# Supplementary material for: The Metabolic Pathway of Bile Secretion Is Vulnerable to Salmonella enterica Exposure in Porcine Intestinal Epithelial Cells
Source: MDPI journal article supplement (doi:10.3390/ani14050789), 2024-03-03
Supplement: s1 [file s1]

**Table S1 Oligonucleotide sequences and size of primers**

| GENE                           | Sequence                                                             | Product length<br>(bp) |
|--------------------------------|----------------------------------------------------------------------|------------------------|
| <i>hilA</i>                    | F: 5'-TCCACGCAGGAAATAACAGG-3'<br>R: 5'-TGGGCAACCAGCACTAACG-3'        | 203                    |
| <i>Inv1</i>                    | F: 5'- GGCGATCCTTGAACAAATAGC -3'<br>R: 5'- CGGCGAACAATAGACTGCTT -3'  | 145                    |
| <i>16S</i>                     | F: 5'- GGCGATCCTTGAACAAATAGC -3'<br>F: 5'- GGCGATCCTTGAACAAATAGC -3' | 180                    |
| <i>TNF-<math>\alpha</math></i> | F: 5'-CGACTCAGTGCCGAGATCAA-3'<br>R: 5'-CTCACAGGGCAATGATCCCA-3'       | 85                     |
| <i>IL-6</i>                    | F: 5'-CTGGGTTCAATCAGGAGACCT-3'<br>R: 5'-TTCCCTTTTGCCTCAGGGTC-3'      | 165                    |
| <i>IL-1<math>\beta</math></i>  | F: 5'-GGCTACTGCCTTCCCTACC -3'<br>R: 5'-CCTGATTGAACCCAGATTGG-3'       | 260                    |
| <i>ABHD2</i>                   | F: 5'- GATCAGTGTGCGCGCTTCTA -3'<br>R: 5'- AGCCATGAAACTTCCGCATC -3    | 193                    |
| <i>AQP8</i>                    | F: 5'- GAGGTCTCCACCTGACGATG -3'<br>F: 5'- CTCCTCAGGACTCACTGCCTTG -3' | 98                     |
| <i>LRFN3</i>                   | F: 5'- ACAGCTGCTCTTGTCCAGTG -3'<br>F: 5'- GCGAGGTCTGTCAACAGGAA -3'   | 146                    |
| <i>THEM6</i>                   | F: 5'- TCCCTGAATCCACCGCTTAC -3'<br>F: 5'- AGATTACGCCTCCGATGTGG-3'    | 203                    |
| <i>DIAPH3</i>                  | F: 5'- CACTGACGGATGATGTGCTG -3'<br>F: 5'- GTCCTTTTCCCGCAATGGTG -3'   | 236                    |
| <i>KLHL3</i>                   | F: 5'- CGAAGAGAATGTCCAGGTGC -3'<br>F: 5'- CGGTCAGCTTGTCACTGGAT-3'    | 272                    |
| <i>GAPDH</i>                   | F: 5'-ACATCATCCCTGCTTCTACTGG-3'<br>R: 5'-CTCGGACGCCTGCTTCAC-3'       | 188                    |
