# Supplementary material for: The Metabolic Pathway of Bile Secretion Is Vulnerable to Salmonella enterica Exposure in Porcine Intestinal Epithelial Cells
Source: Animals (Basel). 2024 Mar 3;14(5):789. doi: 10.3390/ani14050789 (PMC10931422; doi:10.3390/ani14050789)
Supplement: Supplementary file 1 [file animals-14-00789-s001.zip]

Archive with 14 entries (14 files):
- Supplement Figures .pdf
- Table S1 Oligonucleotide sequences and size of primers.pdf
- Table S10. Signaling pathway associated with up- and down-regulated genes that the Salmonella enterica in-fection and LPS groups have in common.xlsx
- Table S11. The differentially expressed genes in IPEC-J2 between the Salmonella-treated and  LPS.xlsx
- Table S12. GO term enriched use up and DOWN-regulated genes between Salmonella infection and LPS treated .xlsx
- Table S13. Signaling pathway associate with  up and DOWN-regulated genes between Salmonella infection and LPS treated .xlsx
- Table S2. The differentially expressed genes in IPEC-J2 between the Salmonella-treated and control groups.xlsx
- Table S3. GO term enrichment in up- and down-regulated genes between Salmonella enterica infection group and control group.xlsx
- Table S4. Signaling pathway associate with  up and DOWN-regulated genes between Salmonella infection and Control group .xlsx
- Table S5. The differentially expressed genes in IPEC-J2 between the LPS-treated and control group .xlsx
- Table S6. GO term enriched use up and DOWN-regulated genes between LPS treated and Control group.xlsx
- Table S7. Signaling pathway associate with  up and DOWN-regulated genes between LPS treated and Control group  .xlsx
- Table S8. The differentially expressed genes in IPEC-J2 between the Salmonella-treated and LPS in commom.xlsx
- Table S9. GO term enrichment in up- and down-regulated genes that the Salmonella enterica infection and LPS .xlsx
