# Supplementary material for: The Metabolic Pathway of Bile Secretion Is Vulnerable to Salmonella enterica Exposure in Porcine Intestinal Epithelial Cells
Source: Animals (Basel). 2024 Mar 3;14(5):789. doi: 10.3390/ani14050789 (PMC10931422; doi:10.3390/ani14050789)
Supplement: Supplementary file 1 [file animals-14-00789-s001.zip › Table S2. The differentially expressed genes in IPEC-J2 between the Salmonella-treated and control groups.xlsx]

## Sheet:  Table S2
gene	baseMean	log2FoldChange	lfcSE	stat	pvalue	padj	change	Nor_1	Nor_2	Nor_3	Nor_4	Sal_1	Sal_2	Sal_3	Sal_4
43891	23.2938	-0.161548	0.448075	-0.360537	0.718445	0.873615	NOT	26	17	18	20	29	18	21	48
43892	175.161	-0.156859	0.313655	-0.500102	0.617003	0.815414	NOT	189	135	174	115	210	291	89	263
43895	208.457	-0.00227139	0.205749	-0.0110396	0.991192	0.996695	NOT	189	137	216	155	291	240	165	396
43896	86.3594	0.274901	0.261966	1.04938	0.294005	0.568031	NOT	59	58	84	60	156	117	62	168
43897	100.555	-0.244566	0.267779	-0.913312	0.361079	0.629959	NOT	72	69	139	89	165	90	66	177
43898	75.7258	0.774518	0.341509	2.26793	0.0233335	0.130541	NOT	45	29	69	46	118	155	59	161
CYP2B22	26.2599	7.88383	1.18102	6.67546	2.46466e-11	4.61596e-09	UP	0	0	0	0	53	110	16	96
44076	483.665	0.00458252	0.204731	0.0223831	0.982142	0.993296	NOT	497	258	463	399	724	550	374	903
44078	197.353	-0.863502	0.292035	-2.95685	0.00310804	0.0320838	NOT	228	260	196	146	287	103	101	283
44079	38.7636	0.733306	0.495349	1.48038	0.138771	0.382829	NOT	35	22	12	26	117	23	28	115
44080	72.4073	0.342631	0.330433	1.03691	0.299776	0.575131	NOT	54	38	44	74	124	84	85	111
44081	269.512	-0.452891	0.234051	-1.93501	0.0529895	0.2193	NOT	331	229	280	191	301	270	198	398
44082	235.834	-0.600945	0.232914	-2.58012	0.00987656	0.0738021	NOT	259	219	282	185	330	142	152	396
44083	1051.26	0.879869	0.169417	5.19352	2.06351e-07	1.34245e-05	NOT	533	511	804	629	2251	1547	935	2563
44084	64.4656	-0.648862	0.378547	-1.71409	0.0865128	0.293576	NOT	62	34	92	79	85	26	51	108
44085	136.016	0.0188094	0.239978	0.0783797	0.937526	0.974693	NOT	111	108	126	103	285	129	95	233
A1CF	468.646	0.685392	0.278471	2.46127	0.0138446	0.0928715	NOT	228	313	348	298	777	982	329	882
A4GALT	70.4477	-0.144453	0.351684	-0.410746	0.681259	0.853139	NOT	57	53	46	86	105	44	70	132
A4GNT	259.278	0.469525	0.217172	2.162	0.0306185	0.155384	NOT	199	151	176	192	500	265	294	497
AAAS	68.5357	-0.631175	0.295115	-2.13874	0.0324568	0.161859	NOT	64	59	69	83	101	58	45	75
AACS	53.1095	-0.188349	0.340929	-0.552457	0.580635	0.793573	NOT	37	49	65	38	85	63	26	96
AAED1	19.6714	-0.461921	0.50332	-0.917749	0.35875	0.628119	NOT	15	11	18	32	26	17	12	34
AAGAB	106.77	0.500526	0.274272	1.82493	0.068012	0.256068	NOT	92	50	93	61	199	136	119	181
AAK1	248.27	0.34625	0.303757	1.13989	0.254331	0.528501	NOT	104	249	199	160	447	371	218	379
AAMDC	85.7641	0.843724	0.285405	2.95623	0.00311421	0.0321193	NOT	42	44	75	45	212	121	86	158
AAMP	130.618	-0.183526	0.267145	-0.68699	0.492089	0.735143	NOT	131	71	124	139	236	131	75	225
AAR2	120.666	0.383479	0.253562	1.51237	0.130441	0.368993	NOT	91	71	101	86	249	178	83	216
AARS	259.703	-0.334544	0.239376	-1.39756	0.162244	0.417973	NOT	292	141	266	272	408	248	150	439
AARS2	125.684	-0.817091	0.298549	-2.73688	0.00620258	0.0528025	NOT	79	112	228	125	160	103	69	147
AARSD1	261.645	-0.230187	0.250043	-0.920593	0.357263	0.626818	NOT	258	158	246	280	526	192	180	415
AASDH	40.6445	-0.877659	0.359465	-2.44157	0.0146234	0.0963921	NOT	36	34	66	42	53	35	17	49
AASDHPPT	47.9322	-0.419589	0.407369	-1.03	0.303011	0.578235	NOT	43	62	40	32	73	27	48	60
AATF	60.4717	-0.418021	0.384845	-1.08621	0.277387	0.552574	NOT	33	37	99	68	99	43	30	121
ABAT	102.13	-0.228773	0.304947	-0.750205	0.453131	0.708924	NOT	129	63	79	94	183	71	78	176
OTOP3	17.4097	7.30207	1.31735	5.54302	2.97305e-08	2.50564e-06	UP	0	0	0	0	105	13	3	106
ABCA2	224.603	0.00840917	0.271029	0.0310268	0.975248	0.989992	NOT	139	216	234	150	328	328	166	324
SLC46A1	779.637	5.65668	0.654499	8.64276	5.48721e-18	4.31624e-15	UP	12	46	17	21	3289	1597	334	3903
ABCA5	112.19	-0.494	0.3135	-1.57576	0.115082	0.344194	NOT	73	100	135	127	114	81	114	151
ABCA7	329.568	0.33267	0.29775	1.11728	0.263874	0.540248	NOT	246	324	255	125	601	344	359	579
ABCB1	92.6277	0.256535	0.360783	0.71105	0.477053	0.726557	NOT	35	60	99	89	127	162	60	174
ABCB10	71.8367	0.253291	0.361751	0.70018	0.483815	0.730926	NOT	27	53	81	59	147	102	39	137
ABCB6	52.1545	0.83113	0.451571	1.84053	0.0656903	0.251497	NOT	13	48	41	21	133	91	32	105
ABCB7	38.526	-0.605993	0.400351	-1.51365	0.130114	0.368775	NOT	54	30	47	25	63	22	21	64
ABCB8	68.1392	-0.390754	0.454858	-0.859069	0.390303	0.657898	NOT	88	15	62	96	109	78	29	105
LOC102158609	58.3263	5.40827	1.05189	5.14149	2.72561e-07	1.64079e-05	UP	0	4	5	0	259	109	20	304
ABCC1	14.4315	0.182062	0.546183	0.333335	0.738881	0.883378	NOT	13	9	15	8	17	19	15	26
ABCC10	130.756	-0.408802	0.308097	-1.32686	0.184554	0.448369	NOT	83	94	196	131	186	89	127	166
ADA	527.834	5.28702	0.409182	12.921	3.42818e-38	4.04491e-34	UP	20	19	45	6	2399	667	516	2457
PLCH2	20.612	5.1041	0.890127	5.73412	9.80172e-09	1.00566e-06	UP	0	0	4	0	74	34	32	77
ABCC5	65.787	0.165582	0.29519	0.560932	0.574844	0.79005	NOT	58	46	63	40	134	63	49	133
ABCC6	27.949	0.904305	0.625664	1.44535	0.148359	0.399199	NOT	15	2	25	25	36	77	15	58
PDX1	200.301	4.84004	0.420676	11.5054	1.23949e-30	3.65618e-27	UP	9	8	22	7	936	235	188	928
ABCD3	172.241	0.815125	0.277217	2.94039	0.003278	0.0332278	NOT	85	124	108	92	329	318	128	384
ABCD4	39.2505	0.729764	0.37057	1.9693	0.0489187	0.208673	NOT	23	18	36	22	63	63	45	75
ABCE1	105.094	-0.719789	0.333185	-2.16033	0.0307473	0.155598	NOT	104	127	76	117	165	54	53	174
ABCF1	200.625	-0.287624	0.247377	-1.16269	0.244953	0.518132	NOT	184	123	245	192	333	147	121	406
ABCF2	86.9963	-0.167918	0.348006	-0.482515	0.62944	0.823823	NOT	121	38	62	85	131	73	70	162
ABCF3	172.815	-0.14798	0.247003	-0.599105	0.549103	0.775285	NOT	113	127	216	155	325	175	103	288
ABCG1	12.824	1.43886	0.741333	1.94091	0.0522687	0.217078	NOT	2	13	6	1	28	25	14	29
ABCG2	73.5938	0.0595603	0.481482	0.123702	0.901551	0.959085	NOT	41	119	26	38	107	106	59	107
ABCG5	102.143	0.51686	0.312289	1.65507	0.0979098	0.314265	NOT	38	65	91	86	166	164	82	217
ABCG8	163.537	0.989973	0.314021	3.15257	0.00161838	0.0193861	NOT	63	91	159	57	333	303	140	365
PDZK1IP1	51.8383	4.66432	0.695129	6.71001	1.94617e-11	3.82715e-09	UP	0	5	4	4	220	89	14	292
ABHD10	29.2715	-0.228519	0.412514	-0.553965	0.579603	0.792988	NOT	24	18	41	24	39	21	25	59
ABHD11	107.295	-0.062628	0.238722	-0.262347	0.793054	0.911366	NOT	92	89	91	89	154	111	85	203
ABTB2	25.12	4.51912	0.701554	6.44158	1.18233e-10	1.83557e-08	UP	4	0	1	2	80	60	30	88
ABHD13	33.2448	0.155798	0.411003	0.379066	0.704639	0.866406	NOT	27	27	37	14	66	44	23	52
ABHD14A	150.111	-0.03619	0.254581	-0.142155	0.886958	0.9528	NOT	116	102	127	158	259	115	142	263
ABHD14B	292.055	0.808084	0.213324	3.78807	0.000151824	0.0030736	NOT	159	188	211	145	631	390	244	759
ABHD16A	164.518	0.476902	0.334724	1.42476	0.154227	0.408468	NOT	77	161	140	72	261	288	121	324
ABHD17A	868.206	0.939241	0.207515	4.52614	6.00709e-06	0.000225852	NOT	424	519	532	485	1770	1533	713	2029
ABHD17B	98.7252	0.43379	0.30532	1.42077	0.155383	0.410332	NOT	88	70	67	52	182	116	63	273
ABHD17C	134.971	0.839518	0.307799	2.72749	0.00638187	0.0539782	NOT	48	70	144	67	295	200	106	340
ABHD18	20.7698	-0.605741	0.521508	-1.16152	0.245432	0.518452	NOT	19	8	28	30	35	13	16	22
LOC100525291	20.9587	4.46371	0.982203	4.54458	5.5044e-06	0.000210401	UP	0	0	0	6	81	68	5	72
SLC2A8	136.558	4.43	1.3744	3.22322	0.00126759	0.0161515	UP	0	26	12	0	381	344	167	493
FRMD1	47.482	4.41614	0.63138	6.99443	2.6634e-12	7.30825e-10	UP	0	4	3	7	152	159	26	155
ABHD5	43.4421	0.565999	0.4146	1.36517	0.1722	0.431836	NOT	21	40	19	33	92	40	36	120
ABHD6	131.186	0.817076	0.370249	2.20683	0.0273262	0.143938	NOT	53	117	96	44	260	265	97	245
ABHD8	14.8386	0.700813	0.675186	1.03796	0.299291	0.574948	NOT	2	6	22	9	21	27	19	21
ABI1	182.4	-0.223321	0.282339	-0.790967	0.428963	0.690873	NOT	231	157	158	101	263	150	136	356
ABI2	14.6067	-0.151136	0.626633	-0.241188	0.80941	0.918749	NOT	14	9	25	5	38	10	9	20
ABI3BP	48.4052	0.0190211	0.48815	0.0389656	0.968918	0.986826	NOT	56	38	13	47	41	58	57	78
ABL1	263.224	-0.245231	0.231948	-1.05727	0.290389	0.565102	NOT	298	191	235	222	457	294	151	384
ABL2	56.8099	0.395548	0.429825	0.920253	0.35744	0.626992	NOT	26	16	78	50	107	94	34	110
ABLIM1	349.649	1.04929	0.28305	3.70708	0.000209661	0.00390805	NOT	204	219	224	104	774	644	270	828
ABLIM2	16.5535	-0.24898	0.645287	-0.385845	0.699612	0.863711	NOT	8	20	17	13	10	20	23	13
ABLIM3	16.4775	-0.364152	0.506019	-0.719641	0.471746	0.723344	NOT	17	14	20	11	24	11	12	31
ABR	426.6	0.0646193	0.189686	0.340665	0.733356	0.879914	NOT	348	266	424	357	663	424	317	965
ABRACL	110.459	-0.50963	0.397444	-1.28227	0.199748	0.467634	NOT	109	75	128	123	173	28	75	246
ABRAXAS1	31.4702	-0.303049	0.441412	-0.686545	0.492369	0.735282	NOT	30	26	19	39	42	30	14	72
ABRAXAS2	40.7425	-0.367472	0.365842	-1.00446	0.315159	0.589966	NOT	27	35	45	46	59	42	19	75
ABT1	89.5961	-0.309548	0.322884	-0.958698	0.337711	0.609274	NOT	101	64	105	62	152	47	79	149
ABTB1	56.1241	-0.491766	0.363641	-1.35234	0.176267	0.436969	NOT	61	67	36	47	67	58	42	68
CYP1A1	753.956	4.21997	0.841697	5.01364	5.34091e-07	2.94474e-05	UP	12	104	71	61	1498	3620	388	1599
ACAA1	578.44	0.439293	0.221576	1.98258	0.0474146	0.205111	NOT	332	500	434	341	1207	666	479	1235
ACAA2	67.7211	0.163295	0.307048	0.531821	0.59485	0.80268	NOT	55	54	46	55	146	69	44	134
ACACA	132.836	0.0489931	0.23972	0.204377	0.838059	0.929658	NOT	114	81	157	88	228	133	112	241
ACACB	23.3025	-0.60621	0.836842	-0.724402	0.468819	0.721015	NOT	35	32	24	0	11	33	24	11
ACAD10	92.5436	-0.314519	0.338475	-0.929224	0.352773	0.622643	NOT	49	79	159	62	128	95	60	155
ACAD11	52.2792	0.00435758	0.373192	0.0116765	0.990684	0.996695	NOT	23	44	49	56	58	62	48	99
ACAD8	134.885	0.0495745	0.274567	0.180556	0.856716	0.939053	NOT	113	111	117	97	212	182	68	287
ACAD9	97.3326	0.211406	0.307714	0.687022	0.492069	0.735143	NOT	55	97	92	52	167	121	90	157
ACADL	111.694	-0.367246	0.333118	-1.10245	0.270266	0.547258	NOT	120	105	117	75	136	72	60	291
ACADM	238.298	-0.181364	0.285608	-0.635009	0.525423	0.759903	NOT	257	148	255	189	359	134	183	567
ACADS	237.235	0.287782	0.234314	1.22819	0.219377	0.49107	NOT	175	140	189	207	483	246	153	575
ACADSB	122.022	-0.022929	0.359021	-0.0638652	0.949078	0.979904	NOT	130	134	63	67	155	151	119	173
ACADVL	475.146	-0.236616	0.230484	-1.0266	0.304608	0.579596	NOT	346	420	404	519	724	519	252	882
MLN	36.0803	4.14459	1.30612	3.1732	0.00150767	0.0184917	UP	0	6	0	6	196	18	17	206
ACAP2	113.72	0.361907	0.24912	1.45274	0.146295	0.39554	NOT	84	59	98	91	188	161	106	200
ACAP3	62.8394	0.360216	0.378237	0.952355	0.340917	0.612156	NOT	65	36	38	42	59	95	60	146
ACAT1	156.474	-0.771695	0.253449	-3.04477	0.00232855	0.0260176	NOT	196	134	176	150	162	147	67	249
ACAT2	118.002	-0.4977	0.253838	-1.9607	0.0499136	0.211314	NOT	123	100	106	127	163	120	59	184
ACBD3	82.8499	-0.890108	0.325668	-2.73317	0.00627272	0.0531374	NOT	48	110	107	89	103	61	42	104
ACBD4	29.9838	-0.378505	0.489299	-0.773566	0.439188	0.699416	NOT	17	42	25	26	46	19	13	73
ACBD5	203.289	0.440812	0.280899	1.56929	0.11658	0.346393	NOT	193	80	134	168	329	234	168	542
ACBD6	85.9207	0.414416	0.327194	1.26658	0.205307	0.475051	NOT	58	28	71	91	174	110	73	162
ACD	76.8412	-0.092979	0.366258	-0.253862	0.799602	0.914673	NOT	51	75	44	86	107	111	60	92
ACE	2306.51	0.878405	0.745808	1.17779	0.23888	0.512204	NOT	745	2136	1028	1275	2049	7817	1843	1731
ACE2	1097.53	0.832515	0.3743	2.22419	0.0261356	0.139767	NOT	333	1060	651	494	1901	2545	849	1753
ACER3	34.0143	-0.16847	0.531311	-0.317084	0.75118	0.888384	NOT	24	26	12	55	68	26	13	80
ACIN1	431.422	-0.16148	0.205252	-0.786743	0.431432	0.693203	NOT	327	358	511	323	600	480	368	619
ACKR3	24.3083	-0.100426	0.562335	-0.178587	0.858262	0.939617	NOT	8	33	30	11	25	23	29	37
RDH5	26.9284	4.06426	0.713498	5.69625	1.22472e-08	1.22461e-06	UP	0	6	4	0	95	57	20	118
ACLY	169.487	-0.296322	0.25187	-1.17649	0.239399	0.512441	NOT	207	128	128	151	221	177	126	264
ACO1	324.712	-0.307598	0.207348	-1.48349	0.137945	0.381621	NOT	341	229	276	341	475	305	251	476
ACO2	859.39	-0.36816	0.234854	-1.56761	0.116971	0.346944	NOT	761	855	648	892	1364	698	461	1656
ACOD1	12.2607	-1.65108	1.04973	-1.57286	0.115751	0.345297	NOT	7	21	0	30	14	0	8	9
ACOT11	246.203	0.360193	0.234329	1.53713	0.124263	0.359886	NOT	129	187	216	181	403	363	216	439
ACOT12	15.163	-0.0310275	0.747419	-0.0415129	0.966887	0.986195	NOT	9	23	5	11	11	36	4	25
ACOT13	86.5704	0.0646531	0.32652	0.198007	0.84304	0.93248	NOT	71	88	56	60	135	82	55	221
ACOT7	74.3441	-0.390803	0.363841	-1.0741	0.282776	0.55917	NOT	60	70	89	62	128	29	51	155
ACOT8	196.551	0.567677	0.306412	1.85266	0.0639315	0.246271	NOT	100	173	177	72	355	303	170	395
ACOT9	90.6862	-0.673614	0.264605	-2.54574	0.0109047	0.0787689	NOT	101	77	85	104	107	72	65	116
ACOX1	593.498	1.00318	0.24279	4.13188	3.59813e-05	0.00097458	NOT	356	317	299	325	1178	1208	468	1278
ACOX2	61.3909	-0.742318	0.379533	-1.95587	0.0504806	0.212418	NOT	31	62	86	77	99	49	37	54
ACOX3	21.3586	-0.413194	0.74823	-0.552229	0.580792	0.7936	NOT	2	43	19	13	23	39	6	26
ACP1	243.892	-0.134505	0.210468	-0.639077	0.522773	0.75865	NOT	215	149	271	222	447	214	183	400
LOC100737755	30.1538	3.86539	0.764314	5.05733	4.25169e-07	2.40027e-05	UP	0	10	0	2	116	38	30	144
ACP5	84.5098	0.682041	0.394021	1.73098	0.0834557	0.288428	NOT	43	74	72	25	176	139	45	215
ACP6	166.307	-0.0719287	0.351434	-0.204672	0.837828	0.929616	NOT	155	198	128	71	308	120	105	382
ACPT	32.759	0.33828	0.39511	0.856165	0.391907	0.658996	NOT	14	26	32	24	64	41	29	57
SLC16A9	14.0078	3.85327	0.961207	4.00879	6.10318e-05	0.00151603	UP	6	0	0	0	36	15	20	78
ACSF2	426.69	-0.179032	0.248085	-0.721655	0.470507	0.722367	NOT	395	439	366	279	588	474	385	551
ACSF3	169.638	0.170792	0.297711	0.573684	0.566182	0.786378	NOT	114	65	212	155	313	214	106	343
ACSL1	31.7178	-0.574983	0.525547	-1.09407	0.273926	0.550247	NOT	22	15	21	67	36	22	30	39
TIMP4	13.7585	3.80644	0.850994	4.47293	7.71533e-06	0.000274196	UP	0	4	2	0	33	28	16	64
ACSL4	70.0648	-0.590992	0.366103	-1.61428	0.106467	0.329055	NOT	69	32	100	85	105	38	60	87
ACSL5	498.305	0.520869	0.282451	1.8441	0.0651683	0.249731	NOT	213	375	350	405	1111	807	302	938
ACSS1	462.112	0.356157	0.198351	1.79559	0.0725595	0.266375	NOT	305	297	466	289	751	663	396	879
ACSS2	174.832	-0.490244	0.262157	-1.87004	0.0614785	0.240114	NOT	190	92	201	203	216	143	141	247
LRFN3	37.7274	3.79684	0.662009	5.73532	9.73266e-09	1.00566e-06	UP	3	3	6	5	100	162	13	91
ACTA2	491.154	-0.985434	0.189767	-5.19287	2.07073e-07	1.34245e-05	NOT	595	378	665	548	495	387	279	537
ACTB	18531.9	0.271689	0.223646	1.21482	0.224436	0.497012	NOT	15361	11009	14298	15017	43106	16245	12100	43208
ACTC1	26.0249	-0.965571	0.525626	-1.83699	0.066211	0.252701	NOT	23	12	68	18	26	20	15	31
ACTG1	7060.44	0.102203	0.175735	0.581576	0.560853	0.782821	NOT	5746	4953	5610	6177	11488	9398	4986	12607
F10	12.2037	3.70654	0.951104	3.89709	9.7355e-05	0.00218798	UP	3	0	3	0	77	11	10	37
ACTL6A	31.3418	0.0825062	0.54932	0.150197	0.880609	0.950188	NOT	43	7	16	35	55	19	39	51
ACTN1	176.794	-0.861613	0.288498	-2.98655	0.00282147	0.0298353	NOT	236	119	175	226	150	137	137	197
ACTN2	37.0611	-0.746151	0.544669	-1.36992	0.170713	0.430209	NOT	56	8	36	56	54	24	33	25
ACTN4	487.383	-0.112692	0.207786	-0.542344	0.587582	0.79831	NOT	543	305	404	428	817	480	337	885
ACTR10	143.621	-0.032583	0.225815	-0.144291	0.885271	0.95191	NOT	129	93	154	111	224	145	100	300
ACTR1A	738.081	0.986331	0.236545	4.16974	3.04947e-05	0.00086306	NOT	442	226	538	467	1752	1166	584	1816
ACTR1B	47.9065	-0.237661	0.330041	-0.720094	0.471467	0.723137	NOT	52	38	37	43	64	46	41	75
ACTR2	733.839	-0.268662	0.314382	-0.854573	0.392788	0.65981	NOT	951	500	585	614	1215	322	547	1660
ACTR3	495.57	-0.274319	0.227652	-1.20499	0.228206	0.501041	NOT	388	502	416	465	712	384	451	765
ACTR3B	20.2836	0.542866	0.468454	1.15885	0.246519	0.519593	NOT	14	9	16	16	43	26	22	32
ACTR5	43.2724	0.104723	0.349087	0.299992	0.764183	0.896181	NOT	35	23	43	39	73	61	27	77
ACTR6	36.2319	-0.659764	0.404489	-1.63111	0.102868	0.322203	NOT	53	30	33	30	43	20	31	51
ACTR8	41.9984	0.282197	0.43997	0.641401	0.521262	0.757902	NOT	29	49	19	24	89	61	26	69
ACVR1	24.0047	-0.204172	0.568744	-0.358988	0.719604	0.874259	NOT	17	18	32	19	41	6	34	29
KCNE1	12.1963	3.64238	0.99004	3.67902	0.00023413	0.00429626	UP	4	0	0	2	39	5	15	77
ACVR2B	17.513	0.208872	0.782819	0.26682	0.789608	0.909734	NOT	8	2	22	24	15	52	6	17
ACVRL1	31.5666	0.374032	0.450744	0.829812	0.406645	0.671708	NOT	15	29	27	20	80	30	16	79
ACY1	137.325	0.064743	0.286371	0.226081	0.821138	0.922802	NOT	99	131	100	108	228	194	75	256
ACYP1	52.7431	0.36665	0.346779	1.0573	0.290375	0.565102	NOT	25	37	44	46	93	52	64	92
ACYP2	18.0255	-0.0252198	0.591915	-0.0426072	0.966015	0.985843	NOT	15	14	26	6	18	30	18	18
LOC110256717	113.232	3.61473	1.18318	3.05509	0.00224989	0.0253306	UP	38	10	1	6	577	22	56	707
ADAL	35.2934	0.167269	0.49336	0.339041	0.734579	0.880638	NOT	43	18	13	35	78	20	28	84
ADAM10	29.547	-0.289415	0.543935	-0.532077	0.594673	0.802668	NOT	19	36	29	22	44	57	9	25
ADAM15	482.459	0.32809	0.291879	1.12406	0.260987	0.537032	NOT	306	478	316	284	788	837	375	717
ADAM17	37.7114	-0.511349	0.415041	-1.23204	0.217932	0.489315	NOT	32	25	40	50	48	21	40	46
ADAM19	35.4486	-0.674549	0.416818	-1.61833	0.105591	0.32812	NOT	30	41	24	46	53	21	25	45
ADAM23	14.0968	-0.484123	0.732675	-0.660761	0.508766	0.748076	NOT	12	16	20	6	10	19	17	4
ADAM33	82.6407	-0.686262	0.480895	-1.42705	0.153565	0.407445	NOT	44	125	46	108	60	113	60	62
ADAMDEC1	289.023	-1.05805	0.219399	-4.8225	1.41774e-06	6.74511e-05	NOT	320	238	442	315	328	225	108	357
ADAMTS1	14.437	-0.0345037	0.739287	-0.0466716	0.962775	0.984891	NOT	31	4	11	3	21	8	15	32
ADAMTS10	20.2604	-0.561044	0.648024	-0.865777	0.386613	0.654399	NOT	5	28	23	23	32	4	15	41
ADAMTS12	17.9054	-0.448029	0.647249	-0.692205	0.488808	0.733086	NOT	12	17	18	21	16	39	4	16
GLTPD2	34.7347	3.56527	1.31226	2.7169	0.00658966	0.0552211	UP	0	6	0	11	58	162	25	64
ADAMTS19	32.5131	-0.638509	0.542766	-1.1764	0.239436	0.512441	NOT	18	58	33	18	41	46	10	36
ADAMTS2	13.2136	0.878439	0.810153	1.08429	0.278237	0.553426	NOT	0	16	4	9	29	18	19	17
ADAMTS5	13.5013	0.15871	0.816766	0.194315	0.845929	0.934212	NOT	13	15	14	0	45	11	10	11
ADAMTS6	17.489	0.117116	0.700876	0.167099	0.867292	0.943411	NOT	5	8	38	8	23	33	17	12
ADAMTS7	18.5691	-0.365278	0.501289	-0.728678	0.466199	0.719513	NOT	11	20	21	17	35	13	14	24
ADAMTS9	22.8115	-0.187029	0.494221	-0.378433	0.705109	0.866637	NOT	24	14	20	22	36	18	28	21
ADAMTSL2	15.58	-0.186188	0.887558	-0.209775	0.833843	0.928053	NOT	3	22	28	2	16	4	31	11
ADAMTSL4	19.6581	0.454541	0.67232	0.676078	0.498991	0.739927	NOT	19	21	10	3	22	49	14	24
ADAMTSL5	36.0305	1.02663	0.665809	1.54193	0.12309	0.357454	NOT	2	32	39	6	53	85	40	54
ADAP1	146.705	-0.0986548	0.302941	-0.325657	0.744684	0.886504	NOT	88	167	141	99	215	186	122	189
ADAP2	45.2264	0.372899	0.350606	1.06359	0.287517	0.563015	NOT	35	29	43	25	108	40	38	93
ADAR	188.822	-0.365573	0.244896	-1.49277	0.135497	0.377441	NOT	156	159	235	159	207	230	138	257
ADARB1	37.5604	0.218694	0.424892	0.514706	0.606758	0.810316	NOT	17	32	41	25	41	61	36	61
ADAT2	39.7575	-0.182388	0.355238	-0.513425	0.607654	0.81062	NOT	29	36	35	39	62	49	25	59
ADCK2	38.2204	0.379438	0.448335	0.846327	0.39737	0.663506	NOT	36	28	30	16	99	61	18	56
ADCK5	791.784	-0.384019	0.288231	-1.33233	0.18275	0.445411	NOT	459	1031	760	659	971	909	614	930
ADCY3	13.7754	-1.27567	0.745159	-1.71195	0.0869065	0.293697	NOT	11	13	15	26	29	1	3	16
ADCY4	167.014	0.0644383	0.40876	0.157643	0.874738	0.947785	NOT	142	125	58	202	230	312	81	259
ADCY5	51.7853	0.187091	0.370144	0.505453	0.613241	0.813357	NOT	54	21	54	34	71	64	58	80
ADCY6	163.015	-0.213859	0.332785	-0.642634	0.520462	0.757485	NOT	68	96	246	187	267	177	111	239
TMEM27	12.7703	3.47116	0.888153	3.90829	9.29517e-05	0.00209317	UP	0	0	1	6	30	34	21	30
ADD1	331.552	0.312105	0.230603	1.35343	0.175917	0.436748	NOT	270	196	263	253	504	545	250	592
ADD3	285.992	-0.579909	0.248656	-2.33217	0.0196916	0.117167	NOT	321	250	364	209	318	178	205	531
ADGRA2	63.8406	0.108857	0.355239	0.306433	0.759275	0.893443	NOT	59	30	42	72	102	84	60	86
ADGRA3	83.9048	0.534667	0.389481	1.37277	0.169824	0.428886	NOT	41	20	111	66	167	124	64	175
ADGRB1	26.4371	0.0899973	0.641744	0.140239	0.888472	0.953464	NOT	3	40	31	9	42	36	24	34
ADGRD1	31.7615	-0.126125	0.427102	-0.295304	0.767762	0.898158	NOT	31	24	30	24	38	42	33	32
ADGRE5	81.1315	-0.0290814	0.3384	-0.0859377	0.931516	0.970919	NOT	52	46	63	111	136	101	49	144
ADGRF1	25.6121	0.65577	0.582467	1.12585	0.26023	0.536229	NOT	6	9	25	27	46	30	44	25
ADGRG1	244.709	0.661772	0.303227	2.18243	0.0290775	0.149635	NOT	78	191	196	160	637	296	188	522
ADGRG6	15.3653	1.18499	0.800395	1.48051	0.138737	0.382824	NOT	3	6	16	7	7	58	14	16
ADGRG7	180.886	0.978214	0.332181	2.94482	0.00323146	0.0329257	NOT	72	57	192	98	338	360	189	314
ADGRL1	99.7277	-0.200807	0.435609	-0.46098	0.644813	0.832675	NOT	71	107	89	80	111	134	118	51
ADGRL2	35.2795	-0.497292	0.421373	-1.18017	0.237932	0.51108	NOT	26	32	60	22	35	30	22	71
THEM6	23.6365	3.47112	0.681854	5.0907	3.5674e-07	2.07348e-05	UP	8	2	3	0	62	75	22	66
BCO1	247.493	3.35137	0.471146	7.11323	1.13358e-12	3.26222e-10	UP	22	76	24	17	837	499	147	1137
ADH5	252.596	-0.61361	0.193524	-3.17071	0.00152066	0.0185187	NOT	264	207	306	242	365	182	167	345
ADI1	415.771	0.0325729	0.222032	0.146703	0.883366	0.951135	NOT	358	268	369	373	804	440	226	873
ADIPOR1	81.1072	0.52113	0.268832	1.93849	0.052563	0.217992	NOT	50	44	70	59	141	104	67	203
ADIPOR2	69.7274	-0.0529716	0.380427	-0.139242	0.889259	0.953901	NOT	45	61	36	88	104	102	42	108
ADIRF	13.5514	-0.531226	0.828963	-0.640832	0.521632	0.758281	NOT	14	8	7	23	7	27	11	2
ADK	62.0823	-0.273966	0.430124	-0.636947	0.52416	0.759214	NOT	68	75	63	16	82	51	52	109
CYP3A29	628.383	3.34076	0.36746	9.0915	9.76799e-20	1.15252e-16	UP	85	115	88	80	1497	2341	429	1618
ADNP	130.727	-0.261335	0.311712	-0.838387	0.401813	0.667088	NOT	94	61	218	118	201	109	99	225
ADNP2	39.2378	0.171345	0.450242	0.380561	0.703529	0.865611	NOT	26	40	45	11	72	48	38	52
ADO	67.1524	-0.228182	0.427361	-0.533933	0.593388	0.801672	NOT	118	23	63	40	110	51	52	119
ADORA2A	15.1008	0.557248	0.687218	0.810876	0.417437	0.681107	NOT	4	18	9	8	22	39	9	18
ADPGK	21.3172	0.257171	0.555574	0.462894	0.643441	0.831357	NOT	11	14	7	31	38	31	14	40
ADPRH	42.6169	0.850016	0.613022	1.3866	0.165564	0.422618	NOT	15	7	66	20	54	129	28	53
ADPRHL2	104.679	0.437588	0.266085	1.64454	0.100065	0.318411	NOT	84	52	81	80	215	147	71	217
ADPRM	276.624	0.374758	0.278077	1.34767	0.177763	0.438517	NOT	132	209	230	224	483	480	211	418
ADRM1	348.141	-0.0378338	0.182747	-0.207028	0.835988	0.928272	NOT	263	234	385	300	561	377	245	655
ADSL	75.2812	-0.0287754	0.330071	-0.0871796	0.930529	0.970418	NOT	37	77	90	48	111	80	62	137
ADSS	72.0084	-0.138208	0.3345	-0.413177	0.679477	0.852253	NOT	88	59	40	59	114	75	46	134
ADTRP	31.4653	-0.206198	0.457564	-0.450643	0.652247	0.836871	NOT	12	28	41	32	37	38	16	68
AEBP1	65.9286	0.213675	0.354281	0.603122	0.546428	0.77394	NOT	34	59	43	63	148	85	44	100
AEBP2	87.0996	-0.00168093	0.264048	-0.006366	0.994921	0.997996	NOT	91	53	83	64	141	96	64	162
AEN	106.963	0.504376	0.339903	1.48388	0.13784	0.38151	NOT	58	29	110	105	210	139	91	229
AES	785.027	0.298319	0.16598	1.79732	0.0722851	0.266139	NOT	611	536	710	485	1423	917	635	1657
AFAP1	28.115	-0.294139	0.51867	-0.567103	0.570644	0.787673	NOT	31	29	36	7	52	34	16	30
AFAP1L1	26.6766	-0.632562	0.544093	-1.1626	0.244992	0.518132	NOT	35	42	12	14	36	22	11	47
AFAP1L2	23.5646	-0.403646	0.540303	-0.747074	0.455019	0.710436	NOT	25	31	17	14	50	25	6	33
AFDN	461.239	0.324168	0.236564	1.37032	0.170587	0.430118	NOT	370	200	523	301	872	572	331	1004
AFF1	93.4131	0.0335743	0.281083	0.119446	0.904922	0.959865	NOT	52	73	101	82	135	110	64	198
AFF4	221.332	0.268587	0.316033	0.849869	0.395398	0.662497	NOT	282	86	151	151	397	247	154	532
AFG1L	29.0019	0.09361	0.488584	0.191594	0.84806	0.934898	NOT	19	8	29	39	41	45	19	51
AFG3L2	172.587	0.0490259	0.228916	0.214166	0.830418	0.92706	NOT	159	110	144	150	285	226	115	302
AFMID	64.8666	-0.748625	0.471285	-1.58848	0.112178	0.338515	NOT	71	19	50	131	84	47	50	63
AFTPH	193.031	0.246506	0.281297	0.876318	0.380857	0.648921	NOT	197	141	103	135	314	185	161	479
AGA	14.3547	0.324119	0.588413	0.550837	0.581746	0.794079	NOT	9	16	8	8	34	11	15	24
AGAP1	125.63	0.145682	0.29554	0.492935	0.622058	0.818654	NOT	151	85	76	79	217	144	110	215
AGAP2	16.1867	1.1192	0.559948	1.99875	0.0456349	0.200613	NOT	5	12	6	10	39	18	19	42
AGAP3	94.0892	0.278849	0.35822	0.778428	0.436317	0.696691	NOT	89	44	112	44	147	169	65	146
AGBL2	13.0146	-0.290602	0.869969	-0.334037	0.738352	0.882835	NOT	18	5	27	0	11	23	10	11
AGBL5	50.1137	0.241485	0.380953	0.633897	0.526148	0.760414	NOT	44	24	63	25	65	78	44	88
AQP8	71.7765	3.32256	0.568672	5.84267	5.13723e-09	5.77238e-07	UP	27	11	2	2	266	109	107	216
AGFG1	274.633	0.160984	0.215845	0.745832	0.455769	0.710972	NOT	268	175	264	159	497	294	223	531
AGFG2	44.403	0.164254	0.381911	0.430086	0.667133	0.845665	NOT	41	14	49	38	73	51	44	72
AGGF1	92.0409	-0.227882	0.317421	-0.717917	0.472809	0.72422	NOT	113	52	114	57	171	74	58	163
AGK	39.4739	-0.293721	0.40368	-0.727609	0.466853	0.719683	NOT	52	20	42	32	51	55	21	58
AGL	47.2857	0.362509	0.381075	0.95128	0.341462	0.612204	NOT	22	42	26	44	93	63	41	79
AGMAT	400.067	-0.0737232	0.276537	-0.266594	0.789781	0.909748	NOT	241	430	467	218	699	332	317	748
AGO1	145.604	0.89285	0.308579	2.89342	0.00381071	0.0371103	NOT	101	87	91	58	315	219	85	447
AGO2	16.0965	-0.732595	0.670462	-1.09267	0.274538	0.550546	NOT	23	7	5	31	25	8	8	27
IFFO2	23.2692	3.31522	0.801496	4.13629	3.52962e-05	0.000961801	UP	12	0	0	2	63	66	20	77
AGO4	54.666	-0.464297	0.366466	-1.26696	0.20517	0.474947	NOT	38	67	64	40	80	34	32	110
AGPAT1	51.2158	-0.117309	0.404932	-0.289701	0.772045	0.900697	NOT	45	54	28	45	51	69	29	113
SLC5A10	24.6039	3.29497	0.729684	4.51561	6.31343e-06	0.000234252	UP	8	0	0	7	61	65	20	98
AGPAT3	124.691	0.777259	0.312454	2.4876	0.0128609	0.0883758	NOT	66	60	98	84	247	238	67	303
AGPAT4	93.9079	0.896191	0.348486	2.57167	0.010121	0.075011	NOT	38	60	74	46	168	209	66	188
AGPAT5	55.8348	-0.546402	0.317719	-1.71977	0.0854746	0.291381	NOT	49	54	70	48	72	57	25	92
AGPS	275.998	-0.464729	0.229154	-2.02802	0.0425584	0.192911	NOT	315	237	246	257	398	185	179	506
AGR2	117.585	-0.153091	0.375909	-0.407256	0.68382	0.854903	NOT	108	35	165	118	231	70	86	232
AGRN	493.707	0.138728	0.280777	0.494087	0.621245	0.817905	NOT	227	363	639	356	724	717	437	713
AGT	30.1141	-0.751407	0.707896	-1.06147	0.288478	0.563629	NOT	3	70	29	17	49	11	13	58
AGTPBP1	14.8598	-0.292082	0.551543	-0.529573	0.596408	0.803957	NOT	16	12	10	16	25	14	6	30
AGTRAP	35.7708	0.606943	0.411478	1.47503	0.140204	0.385071	NOT	12	18	40	26	75	40	40	70
AHCTF1	83.0304	-1.05823	0.344272	-3.07381	0.00211346	0.0240935	NOT	59	75	160	86	86	50	61	72
AHCY	332.95	0.153099	0.278984	0.548774	0.58316	0.794814	NOT	303	154	258	337	572	465	175	702
AHCYL1	466.72	0.720788	0.305912	2.35619	0.0184635	0.111775	NOT	439	290	264	164	1137	527	327	1285
TLL2	49.619	3.28391	0.667859	4.91706	8.7853e-07	4.52654e-05	UP	0	16	3	10	84	188	54	111
AHDC1	23.2473	-0.39102	0.612792	-0.638097	0.523411	0.75865	NOT	11	41	16	15	22	39	16	18
AHI1	21.1157	-0.975803	0.561494	-1.73787	0.0822339	0.286533	NOT	19	21	49	7	24	16	12	22
AHNAK	463.693	-0.110223	0.222823	-0.494667	0.620835	0.817872	NOT	317	447	448	371	699	581	354	645
AHNAK2	17.3214	-0.569311	0.624087	-0.91223	0.361648	0.630365	NOT	12	11	22	25	36	3	10	32
AHR	33.2725	0.458259	0.417104	1.09867	0.271913	0.54872	NOT	31	13	35	16	53	34	36	80
AHRR	139.058	0.118051	0.463785	0.254539	0.799079	0.91454	NOT	84	220	75	39	212	169	152	174
AHSA1	254.495	-0.20742	0.209613	-0.989538	0.3224	0.595491	NOT	256	191	240	218	389	201	184	509
AHSA2	14.4983	0.0591394	0.646392	0.0914916	0.927102	0.969343	NOT	11	19	8	7	28	9	20	15
AICDA	13.3621	1.03303	0.877375	1.17742	0.23903	0.512225	NOT	8	9	7	5	49	3	1	67
AIDA	272.945	-0.371525	0.206073	-1.80288	0.0714066	0.264779	NOT	240	190	343	262	364	224	183	514
AIF1	180.823	-0.279981	0.338785	-0.826427	0.408562	0.673705	NOT	179	189	155	124	265	80	197	300
AIFM1	122.028	-0.519516	0.283336	-1.83357	0.0667184	0.253448	NOT	144	95	159	85	160	124	54	210
AIFM2	124.108	0.549074	0.354538	1.5487	0.121453	0.35427	NOT	88	58	63	123	212	250	74	233
AIFM3	17.2122	-0.71104	0.653295	-1.08839	0.276423	0.551353	NOT	7	34	19	8	11	18	13	22
AIG1	122.252	0.558973	0.412237	1.35595	0.175115	0.435811	NOT	73	34	134	99	368	83	67	348
AIMP1	253.393	-0.134218	0.197409	-0.6799	0.496568	0.738001	NOT	211	163	296	220	366	271	204	413
AIP	105.542	0.0983489	0.291645	0.337221	0.735951	0.881303	NOT	49	84	113	94	179	104	77	235
AJUBA	16.43	-0.7548	0.583572	-1.29341	0.195868	0.462857	NOT	11	23	25	9	13	9	14	27
AK1	60.5151	-0.0501607	0.44577	-0.112526	0.910406	0.962334	NOT	67	71	20	38	127	48	37	120
AK2	726.113	0.467426	0.203944	2.29194	0.0219093	0.125367	NOT	483	392	617	546	1552	919	472	1714
AK3	330.387	-0.124299	0.252148	-0.492962	0.622039	0.818654	NOT	407	199	330	217	511	282	232	704
TM4SF5	702.35	3.25276	0.344452	9.44328	3.61287e-21	4.73647e-18	UP	51	164	104	112	2232	1825	608	2196
AK6	44.0808	-0.293703	0.387641	-0.757666	0.448651	0.705547	NOT	48	37	57	20	59	47	38	55
AKAIN1	102.517	0.584161	0.330476	1.76763	0.077122	0.276984	NOT	46	42	112	80	185	138	68	292
AKAP10	25.0375	-0.440699	0.441029	-0.999252	0.317673	0.591714	NOT	24	26	26	19	32	14	20	48
AKAP11	56.1836	-0.85966	0.345503	-2.48814	0.0128414	0.0883758	NOT	83	55	49	51	57	46	25	88
AKAP12	216.192	-0.557833	0.232613	-2.39812	0.0164796	0.103814	NOT	250	210	246	146	280	169	153	315
AKAP13	180.202	0.254083	0.267065	0.951388	0.341407	0.612198	NOT	164	155	109	107	310	184	149	415
AKAP14	44.0357	0.251829	0.41134	0.612215	0.540396	0.770228	NOT	39	31	52	13	74	63	38	70
AKAP17A	178.427	-0.314685	0.328029	-0.95932	0.337398	0.609149	NOT	82	158	250	173	197	243	130	220
AKAP2	128.799	-0.735664	0.266306	-2.76248	0.00573644	0.0503603	NOT	132	141	109	143	138	87	82	208
AKAP3	13.8627	1.03892	0.635879	1.63383	0.102294	0.321445	NOT	4	9	7	10	40	11	9	50
AKAP7	75.4508	-0.0916757	0.37279	-0.245918	0.805746	0.917398	NOT	35	59	109	60	99	120	44	113
AKAP8L	283.031	-0.18906	0.247691	-0.76329	0.44529	0.703566	NOT	161	244	348	253	357	341	217	438
AKAP9	121.649	0.568953	0.291202	1.95381	0.0507233	0.212908	NOT	56	81	128	64	224	194	95	253
AKIP1	89.865	0.47054	0.328436	1.43267	0.151953	0.405189	NOT	69	37	106	46	195	104	59	225
AKIRIN1	74.7923	-0.576368	0.295331	-1.9516	0.0509858	0.213554	NOT	69	82	87	57	75	65	53	119
AKIRIN2	121.699	-0.323141	0.264491	-1.22175	0.221803	0.494436	NOT	122	81	150	101	167	84	110	203
AKNA	79.1964	0.970183	0.313178	3.09787	0.00194919	0.0226363	NOT	60	33	59	28	187	106	69	211
AKR1A1	864.895	0.0705928	0.262534	0.26889	0.788014	0.90902	NOT	671	629	831	675	1815	589	502	2230
AKR1B1	54.522	-0.586221	0.337806	-1.73538	0.0826741	0.287052	NOT	68	52	60	36	76	40	43	65
AKR1CL1	88.7189	0.677149	0.387655	1.74678	0.0806752	0.28406	NOT	43	65	90	31	219	67	66	279
AKR1E2	437.137	0.352882	0.232597	1.51714	0.129232	0.367601	NOT	362	282	289	332	1007	393	325	1007
AKR7A2	610.063	0.242873	0.276643	0.877932	0.379981	0.648204	NOT	461	505	490	382	1299	502	337	1704
AKT1	471.243	-0.0848785	0.207347	-0.409354	0.68228	0.853729	NOT	405	328	395	478	775	500	278	951
AKT1S1	170.991	0.00824832	0.277472	0.0297267	0.976285	0.990151	NOT	167	73	170	164	333	148	153	268
AKT2	191.179	0.508625	0.305218	1.66643	0.0956273	0.310211	NOT	120	66	185	165	372	313	114	414
AKT3	93.8483	0.092719	0.323176	0.286899	0.77419	0.901388	NOT	100	72	72	54	149	123	94	111
AKTIP	18.113	0.10449	0.62056	0.168381	0.866284	0.943124	NOT	18	21	6	10	24	12	28	25
ALAD	131.505	0.0558182	0.268711	0.207726	0.835443	0.928095	NOT	124	76	147	88	250	159	74	249
ALAS1	138.445	-0.228302	0.24683	-0.924939	0.354998	0.624283	NOT	103	124	118	145	195	119	119	230
ALCAM	53.1632	0.532184	0.428088	1.24317	0.213806	0.484482	NOT	20	35	21	65	103	54	56	119
ALDH16A1	117.776	-0.12907	0.234582	-0.550212	0.582174	0.794388	NOT	97	80	124	109	165	135	95	184
ALDH18A1	393.233	0.125795	0.22329	0.563369	0.573183	0.789039	NOT	268	268	371	346	752	481	217	809
ALDH1A1	1517.67	0.32155	0.293894	1.0941	0.27391	0.550247	NOT	1324	1108	1219	805	3641	1028	940	4234
ALDH1A2	27.3657	0.821098	0.630969	1.30133	0.193146	0.459269	NOT	19	0	29	21	48	37	23	84
ALDH1A3	489.863	-0.934153	0.21435	-4.35808	1.31209e-05	0.000425313	NOT	604	407	506	613	570	290	247	736
ALDH1B1	260.51	-0.0907162	0.218628	-0.414935	0.67819	0.851635	NOT	259	160	259	221	447	226	173	543
CYP2C34	47.6717	3.22505	1.57028	2.05381	0.039994	0.186275	UP	26	0	5	0	68	221	14	137
ALDH1L2	30.5025	-0.386988	0.470527	-0.822457	0.410817	0.675836	NOT	41	34	23	14	33	39	21	40
ALDH2	216.797	-0.786849	0.234867	-3.3502	0.000807543	0.0113974	NOT	280	183	220	225	318	141	134	249
ALDH3A2	522.957	0.30284	0.227341	1.33209	0.18283	0.445411	NOT	359	436	421	323	981	775	349	960
TSPAN1	74.6557	3.19168	0.401056	7.95818	1.74587e-15	9.36341e-13	UP	14	2	17	17	187	148	92	303
ALDH5A1	86.0895	-0.407078	0.385949	-1.05475	0.291541	0.565865	NOT	73	97	93	61	168	50	29	193
ALDH6A1	140.277	0.000490143	0.316782	0.00154726	0.998765	0.999358	NOT	162	95	151	62	267	104	108	292
ALDH7A1	137.413	-0.1384	0.276204	-0.50108	0.616315	0.814961	NOT	160	91	123	105	232	97	99	294
ALDH9A1	980.754	0.0609927	0.263277	0.231667	0.816797	0.921362	NOT	1191	509	828	676	1821	770	714	2266
ALDOA	2528.97	-0.211096	0.181337	-1.16411	0.244379	0.517814	NOT	2460	1841	2235	2444	4226	2017	1776	4739
ALDOB	4102.69	0.575813	0.282528	2.03807	0.0415428	0.190355	NOT	3107	2769	1852	2970	7836	7395	2369	8724
ALDOC	21.6246	-0.935311	0.500419	-1.86906	0.0616152	0.240243	NOT	19	19	27	30	20	22	5	35
ALG1	21.9394	0.285242	0.53285	0.535314	0.592433	0.801343	NOT	7	23	22	13	39	39	14	32
ALG11	17.1172	0.0806149	0.547658	0.147199	0.882975	0.951001	NOT	23	12	7	12	25	18	16	32
ALG12	154.828	0.014463	0.283598	0.0509981	0.959327	0.983249	NOT	68	135	166	142	277	166	127	243
ALG13	27.4067	-0.461085	0.653179	-0.70591	0.480244	0.72861	NOT	5	32	54	16	14	34	30	26
ALG14	62.7705	0.174242	0.339914	0.512605	0.608228	0.81062	NOT	38	46	54	57	69	96	47	133
ALG2	29.4258	0.405232	0.460917	0.879187	0.3793	0.647852	NOT	19	26	30	9	46	48	21	61
ALG3	34.9508	-0.240791	0.425531	-0.565859	0.57149	0.788349	NOT	48	26	32	19	37	46	27	51
ALG5	23.1574	-0.61709	0.52947	-1.16549	0.243823	0.517365	NOT	18	28	35	13	38	21	5	41
ALG6	14.4831	-0.523096	0.661959	-0.790224	0.429397	0.6911	NOT	6	18	8	23	25	5	10	26
ALG8	25.4315	0.0505227	0.517919	0.0975494	0.92229	0.967545	NOT	20	6	41	20	58	20	21	41
ALG9	39.5997	-0.0668132	0.433124	-0.154259	0.877406	0.94864	NOT	27	33	61	16	63	28	41	69
ALKBH1	37.0529	0.0296614	0.469189	0.0632185	0.949593	0.97994	NOT	33	10	45	37	52	64	27	43
ALKBH3	36.0455	0.409446	0.470231	0.870735	0.383899	0.651463	NOT	40	21	13	27	77	22	36	91
ALKBH4	88.4335	-0.0947803	0.291892	-0.324711	0.7454	0.886504	NOT	60	86	102	55	130	106	60	155
ALKBH5	247.569	0.721153	0.258873	2.78574	0.00534061	0.0477016	NOT	140	116	243	134	528	430	180	495
ALKBH6	73.5732	-0.0201451	0.328912	-0.0612476	0.951162	0.980378	NOT	35	45	98	73	118	68	61	142
ALKBH7	51.1951	0.725413	0.397674	1.82414	0.0681311	0.256339	NOT	42	37	14	31	100	66	53	115
ALKBH8	19.3888	-0.311332	0.757989	-0.410734	0.681268	0.853139	NOT	31	0	32	12	39	13	18	19
ALMS1	24.7294	0.291804	0.568574	0.513221	0.607796	0.81062	NOT	15	4	24	33	56	37	11	46
ALOX12	16.4419	-0.838818	0.681226	-1.23134	0.218197	0.48938	NOT	15	33	13	6	25	4	9	29
ALOX5	14.5158	-0.107295	0.72734	-0.147517	0.882724	0.950905	NOT	19	3	18	12	38	3	7	37
ALOX5AP	12.4974	-0.563339	0.753237	-0.747891	0.454526	0.710051	NOT	6	3	34	10	11	17	10	10
ALPK1	49.6908	-0.981242	0.350525	-2.79935	0.00512059	0.0461707	NOT	60	33	52	74	54	35	31	52
ALS2	28.4722	-0.381945	0.473092	-0.807337	0.419472	0.682544	NOT	42	15	32	19	37	40	18	29
ALS2CL	299.77	-0.428989	0.309753	-1.38494	0.166071	0.423394	NOT	138	337	444	228	453	249	234	384
ALYREF	210.988	-0.351343	0.215191	-1.63271	0.102531	0.321776	NOT	185	170	230	202	346	147	156	347
AMACR	35.4557	-0.739943	0.41535	-1.7815	0.0748316	0.271725	NOT	27	25	59	39	27	26	29	53
AMBN	20.5649	0.431211	0.611416	0.705266	0.480644	0.728758	NOT	2	24	12	18	35	26	21	39
AMBRA1	95.5481	0.475296	0.328361	1.44748	0.147762	0.398048	NOT	37	54	108	71	203	97	111	160
AMCF-II	34.8719	-0.287543	0.504327	-0.570151	0.568575	0.786448	NOT	23	36	42	27	80	13	13	84
AMD1	203.121	-0.349842	0.277853	-1.25909	0.207998	0.478279	NOT	224	191	176	156	296	113	164	393
AMDHD2	512.493	0.300412	0.200666	1.49707	0.134374	0.375961	NOT	402	315	387	418	1154	543	374	1020
AMER1	44.7949	-0.480711	0.379712	-1.26599	0.205517	0.475096	NOT	65	35	46	27	69	41	32	51
AMFR	52.464	0.319425	0.36606	0.872604	0.382879	0.650575	NOT	35	34	67	22	86	78	42	97
AMIGO2	18.1973	-1.22614	0.798461	-1.53563	0.12463	0.360568	NOT	21	17	8	36	18	0	20	14
AMMECR1	70.3781	-0.0379608	0.413946	-0.0917047	0.926933	0.969343	NOT	79	18	101	48	77	81	57	149
AMMECR1L	75.2327	-0.0394493	0.34636	-0.113897	0.90932	0.961927	NOT	63	29	72	93	139	60	56	151
AMN	193.487	0.927822	0.488268	1.90023	0.0574026	0.229435	NOT	42	177	143	72	251	583	104	319
AMN1	66.3042	-0.098132	0.296875	-0.33055	0.740984	0.884012	NOT	53	35	75	68	99	70	48	124
AMOT	73.9522	-0.0844622	0.346611	-0.24368	0.807479	0.918215	NOT	99	37	67	51	106	59	76	128
AMOTL1	28.8732	-0.448913	0.546074	-0.822074	0.411035	0.675836	NOT	42	23	6	36	38	25	23	39
AMOTL2	65.3733	-0.209303	0.325454	-0.643112	0.520152	0.757238	NOT	71	61	54	43	77	62	63	104
AMPD2	213.765	0.255723	0.232189	1.10136	0.270741	0.547562	NOT	134	111	202	207	408	240	163	445
AMPD3	70.3058	0.22901	0.337936	0.677671	0.49798	0.739078	NOT	73	30	50	63	108	91	46	167
AMT	60.7103	-0.182417	0.302291	-0.60345	0.54621	0.77394	NOT	60	36	63	57	97	47	50	109
AMZ2	263.063	0.543477	0.247945	2.19193	0.0283846	0.147278	NOT	142	213	216	134	473	404	229	515
ANAPC1	136.491	-0.900458	0.385921	-2.33327	0.0196339	0.117071	NOT	46	178	219	147	141	111	92	133
GPER1	13.667	3.18805	0.930869	3.42481	0.000615221	0.00925892	UP	8	0	1	0	48	9	26	50
ANAPC11	263.178	0.257463	0.221665	1.1615	0.24544	0.518452	NOT	228	143	218	211	580	294	184	502
ANAPC13	86.8499	-0.0515171	0.333944	-0.154269	0.877398	0.94864	NOT	76	46	112	66	161	49	83	165
ANAPC15	142.826	-0.119741	0.283492	-0.42238	0.672748	0.848322	NOT	79	88	202	136	245	141	115	215
ANAPC16	233.055	-0.384777	0.233674	-1.64664	0.0996323	0.317805	NOT	225	145	271	244	285	174	198	397
ANAPC2	119.434	-0.126033	0.291087	-0.432972	0.665035	0.844249	NOT	78	77	124	137	171	167	81	166
ANAPC4	165.793	-0.41437	0.262999	-1.57556	0.115128	0.344246	NOT	116	147	187	177	201	144	156	205
ANAPC5	38.1687	-0.769893	0.419862	-1.83368	0.0667016	0.253448	NOT	30	43	43	41	29	29	38	38
ANAPC7	107.965	-0.457546	0.301988	-1.51512	0.129743	0.368242	NOT	104	66	95	150	160	71	77	182
ANG	24.9656	0.684208	0.478127	1.43102	0.152425	0.405607	NOT	11	14	12	26	61	23	23	62
ANGEL2	62.766	-0.459753	0.387543	-1.18633	0.235492	0.508059	NOT	26	55	78	83	97	39	53	87
ANGPTL2	47.8611	0.481706	0.485162	0.992878	0.32077	0.594819	NOT	71	13	28	21	71	67	59	76
DMBT1	10208.7	3.17069	0.262019	12.101	1.04377e-33	6.15771e-30	UP	1237	1728	1239	2432	29655	23333	13307	29558
ANK2	72.6964	-0.337951	0.369841	-0.913776	0.360835	0.629927	NOT	79	34	117	48	81	91	56	93
LOC102165485	2942.85	3.1574	0.839231	3.76225	0.000168392	0.00333365	UP	660	495	452	338	15926	732	1124	16752
ANKFY1	25.0637	-0.884299	0.555448	-1.59205	0.111374	0.337094	NOT	47	8	18	35	23	14	19	35
SCARB1	281.106	3.15259	0.452592	6.96563	3.2693e-12	8.44898e-10	UP	40	50	63	36	819	968	80	904
ANKHD1	100.773	-0.115624	0.301233	-0.383837	0.701099	0.864298	NOT	119	66	109	57	127	118	68	201
ANKIB1	75.2894	-0.530179	0.308009	-1.72131	0.0851951	0.291179	NOT	97	62	72	62	86	59	67	98
ANKLE1	18.8311	-0.171552	0.615354	-0.278786	0.780409	0.904967	NOT	16	26	16	7	43	11	6	46
ANKLE2	51.1609	0.281632	0.352545	0.798855	0.424374	0.686199	NOT	31	29	55	40	73	86	42	83
ANKMY2	80.277	-0.600341	0.434989	-1.38013	0.167546	0.425593	NOT	81	93	48	89	103	25	88	104
ANKRA2	17.1039	0.132555	0.706742	0.187558	0.851223	0.936853	NOT	13	0	25	19	27	26	12	28
ANKRD10	291.512	-0.287866	0.398944	-0.721572	0.470558	0.722367	NOT	150	247	410	269	236	384	341	203
ANKRD11	307.314	0.229163	0.267476	0.856761	0.391577	0.658709	NOT	244	149	337	227	419	518	216	554
ANKRD12	147.936	0.470034	0.244223	1.92461	0.0542782	0.222294	NOT	98	90	146	82	250	220	117	321
ANKRD13A	399.575	0.532377	0.214785	2.47865	0.0131879	0.0897888	NOT	321	237	273	250	931	477	286	908
ANKRD13B	39.4949	0.354068	0.460763	0.768438	0.442227	0.701211	NOT	19	11	43	45	53	69	34	67
ANKRD13C	65.9249	0.419146	0.334421	1.25335	0.210079	0.480849	NOT	32	59	40	52	118	68	71	135
ANKRD13D	86.7294	-0.102034	0.355484	-0.287028	0.774091	0.901388	NOT	60	89	102	46	97	136	60	128
ANKRD16	21.6197	0.651549	0.650321	1.00189	0.316398	0.590787	NOT	6	31	13	3	40	33	23	37
ANKRD17	137.698	0.027298	0.318183	0.0857932	0.931631	0.970919	NOT	153	57	141	110	238	95	106	335
ANKRD24	109.125	-0.455813	0.388409	-1.17354	0.240579	0.513977	NOT	72	179	98	55	145	122	65	146
ANKRD27	105.126	0.0904491	0.301544	0.299953	0.764213	0.896181	NOT	75	60	87	116	130	157	84	180
ANKRD28	81.4231	0.403559	0.297581	1.35613	0.175057	0.435759	NOT	62	50	83	40	127	125	68	161
ANKRD29	16.5605	-0.494445	0.510028	-0.969447	0.332322	0.604429	NOT	21	12	16	15	16	18	12	24
ANKRD35	38.4237	-1.03215	0.363557	-2.83902	0.0045252	0.0421351	NOT	36	46	45	43	35	31	16	53
ANKRD37	14.2014	1.2502	0.713258	1.7528	0.0796371	0.28192	NOT	3	11	13	1	22	15	19	51
ANKRD39	69.7971	0.175541	0.368747	0.476048	0.63404	0.826178	NOT	47	64	76	30	83	112	61	113
ANKRD40	127.903	-0.187932	0.229791	-0.81784	0.413449	0.678104	NOT	116	90	116	129	177	130	104	209
ANKRD42	27.491	-0.545816	0.49124	-1.1111	0.266526	0.543695	NOT	23	25	38	24	52	9	13	57
ANKRD44	18.4837	0.226297	0.568624	0.397973	0.69065	0.857968	NOT	21	5	20	12	31	10	21	45
ANKRD46	110.97	0.571136	0.270677	2.11003	0.0348557	0.170577	NOT	53	85	81	74	222	138	120	202
ANKRD49	76.9085	0.103009	0.320234	0.321668	0.747704	0.887266	NOT	65	39	63	80	163	62	74	120
ANKRD50	31.3018	-0.313949	0.474853	-0.661151	0.508516	0.748029	NOT	30	20	54	15	30	41	16	62
ANKRD52	20.7689	-1.03133	0.511962	-2.01447	0.0439607	0.196549	NOT	30	14	18	30	16	10	15	30
ANKRD54	43.7954	0.330731	0.408125	0.810368	0.417729	0.681242	NOT	27	36	16	46	82	50	39	86
FOLH1B	14.305	3.07904	0.795994	3.86817	0.000109654	0.0024075	UP	0	5	5	0	36	36	22	33
ANKRD9	108.746	0.381686	0.310109	1.23081	0.218393	0.489611	NOT	60	76	112	69	248	110	61	284
ANKS1A	161.348	0.422751	0.269455	1.56891	0.116669	0.346483	NOT	101	121	159	78	298	251	129	281
ANKS3	20.0693	-0.984819	0.61502	-1.60128	0.109315	0.333715	NOT	27	33	14	11	34	6	15	15
ANKS4B	412.123	0.033241	0.2224	0.149465	0.881187	0.950211	NOT	372	335	415	231	705	437	270	863
SEL1L3	30.1518	3.07568	1.26632	2.42882	0.0151479	0.0989648	UP	10	0	0	11	100	93	12	92
ANO1	37.4732	-0.666835	0.546906	-1.21929	0.222736	0.495783	NOT	58	23	38	33	16	30	50	29
ANO10	114.109	0.990225	0.339048	2.9206	0.00349358	0.0349922	NOT	53	89	73	35	317	170	89	249
ANO6	122.043	-0.07903	0.441647	-0.178944	0.857982	0.939574	NOT	70	114	108	119	131	276	63	97
ANO8	24.1997	-0.927658	0.731954	-1.26737	0.205022	0.474724	NOT	19	2	74	20	48	19	5	23
ANO9	106.384	0.184986	0.316819	0.583884	0.559299	0.781891	NOT	59	74	75	120	167	151	63	229
ANP32A	311.803	-0.115584	0.255279	-0.452777	0.650709	0.83608	NOT	316	146	348	285	510	230	273	581
ANP32B	682.015	-0.361956	0.212186	-1.70585	0.0880367	0.295962	NOT	819	549	522	628	943	612	513	1048
ANP32E	166.313	-0.442268	0.278965	-1.58539	0.112878	0.340116	NOT	200	123	163	150	288	90	130	248
ANPEP	7938.08	0.862463	0.682243	1.26416	0.206173	0.475962	NOT	2626	5849	3183	6469	10699	25984	3181	10418
ANTXR1	61.5486	-0.292687	0.33599	-0.871117	0.38369	0.651231	NOT	61	60	69	34	84	44	56	104
ANTXR2	143.577	0.0612063	0.314135	0.194841	0.845518	0.934107	NOT	102	122	121	116	197	228	133	149
ANXA1	356.222	-0.794856	0.261324	-3.04165	0.00235286	0.02619	NOT	444	274	300	470	396	218	275	444
ANXA11	525.47	-0.0269966	0.168973	-0.159768	0.873064	0.947232	NOT	497	342	510	419	809	533	429	973
ANXA13	866.764	-0.820785	0.204631	-4.01106	6.04479e-05	0.00150469	NOT	793	816	1179	907	1179	508	429	1366
ANXA2	2371.38	-0.493014	0.226365	-2.17796	0.0294092	0.150607	NOT	2854	1680	2285	2386	3853	1485	1385	4252
SLC29A3	33.182	3.05639	0.561969	5.43871	5.36672e-08	4.22146e-06	UP	1	6	11	6	78	104	28	100
ANXA5	415.748	-0.831404	0.210373	-3.95205	7.7486e-05	0.00181761	NOT	501	409	397	442	469	254	259	614
ANXA6	196.644	-0.719997	0.270994	-2.65687	0.00788691	0.0623293	NOT	227	211	197	167	228	106	165	264
ANXA7	139.831	-0.397439	0.233359	-1.70312	0.0885455	0.296888	NOT	154	111	130	131	213	105	98	231
ANXA8	30.5078	-0.894891	0.504726	-1.77302	0.0762249	0.274787	NOT	18	38	45	30	23	43	15	22
ANXA9	16.0025	-1.11556	0.569043	-1.96042	0.0499467	0.211378	NOT	13	14	29	18	9	18	6	19
GZMH	24.1817	3.04194	0.871159	3.49183	0.000479727	0.00756725	UP	3	0	16	0	64	16	72	50
AP1AR	20.5882	-0.945071	0.682682	-1.38435	0.166251	0.423672	NOT	25	17	28	21	31	0	13	37
AP1B1	340.597	0.248896	0.238915	1.04178	0.297514	0.572841	NOT	326	173	279	262	660	386	210	798
AP1G1	219.927	-0.25413	0.248804	-1.02141	0.307061	0.581824	NOT	196	154	234	216	358	167	119	491
AP1G2	26.008	-0.264019	0.46211	-0.571334	0.567773	0.786378	NOT	35	23	14	20	37	30	19	35
AP1M1	195.336	0.0790039	0.23329	0.338651	0.734873	0.880638	NOT	132	177	184	134	348	232	129	370
AP1M2	136.377	-0.138011	0.295245	-0.467444	0.640182	0.829327	NOT	171	59	145	107	194	156	95	240
AP1S1	247.288	0.330737	0.258709	1.27841	0.201104	0.469762	NOT	186	103	224	225	563	229	195	528
AP1S2	68.9159	-0.424602	0.325658	-1.30383	0.192292	0.458113	NOT	46	80	67	65	70	67	48	123
AP1S3	55.7386	-0.629318	0.358955	-1.7532	0.0795685	0.281897	NOT	50	50	73	52	83	45	47	42
AP2A1	602.921	0.265672	0.273892	0.969988	0.332053	0.604332	NOT	486	268	664	440	963	1011	338	1187
AP2A2	383.362	0.121537	0.209869	0.579108	0.562516	0.78353	NOT	261	241	438	296	653	512	267	677
AP2B1	275.833	-0.679945	0.23032	-2.95218	0.00315544	0.0323748	NOT	335	239	260	287	397	166	164	430
AP2M1	457.916	-0.540734	0.270609	-1.99821	0.0456939	0.200723	NOT	559	322	395	520	686	250	267	894
AP2S1	321.079	0.73958	0.207678	3.56118	0.000369186	0.00616128	NOT	201	173	188	232	708	459	259	737
AP3B1	100.567	0.106148	0.277951	0.381895	0.702539	0.865177	NOT	100	74	61	82	180	97	87	188
AP3D1	279.204	0.461476	0.227979	2.0242	0.0429498	0.19394	NOT	157	138	252	241	484	410	249	532
AP3M1	111.685	0.153833	0.268797	0.572302	0.567118	0.786378	NOT	116	67	91	78	192	114	78	262
AP3S1	242.079	-0.603127	0.237368	-2.54089	0.0110569	0.0794038	NOT	263	193	256	256	264	152	201	379
AP3S2	212.531	0.0708142	0.215686	0.328321	0.742669	0.885201	NOT	166	151	206	167	320	288	141	403
AP4B1	123.64	-0.228787	0.252511	-0.90605	0.36491	0.633477	NOT	112	99	120	112	220	88	82	238
AP4E1	22.5365	-0.146113	0.504588	-0.289569	0.772146	0.900697	NOT	22	21	19	16	22	32	9	54
AP4M1	95.1682	-0.0890125	0.318714	-0.279286	0.780025	0.904789	NOT	83	40	87	119	154	115	64	153
CYBRD1	405.66	3.0268	0.277073	10.9242	8.83291e-28	2.08439e-24	UP	86	80	57	66	994	1094	546	998
AP5B1	110.757	0.190101	0.275878	0.689077	0.490775	0.734217	NOT	70	92	121	62	226	108	90	211
AP5M1	68.8963	0.598686	0.308422	1.94113	0.0522426	0.217046	NOT	41	45	53	42	95	81	83	167
AP5Z1	321.86	-0.456826	0.230717	-1.98002	0.0477008	0.20586	NOT	254	369	293	298	465	246	238	479
APAF1	138.769	-0.494313	0.286	-1.72837	0.0839227	0.289533	NOT	74	143	181	141	170	140	92	195
APBA3	59.2388	-0.224999	0.368327	-0.610867	0.541288	0.77032	NOT	26	52	71	64	90	40	45	123
APBB1	39.1067	-0.854548	0.426778	-2.00232	0.04525	0.199572	NOT	42	48	22	50	40	21	26	61
APBB1IP	16.5974	0.352187	0.540121	0.652052	0.514368	0.752459	NOT	9	6	16	18	22	19	19	35
APBB2	58.1117	-0.358068	0.323576	-1.1066	0.268469	0.545764	NOT	51	48	54	62	87	67	42	62
APBB3	15.3617	0.230712	0.594312	0.388199	0.697869	0.862757	NOT	12	4	18	14	19	28	14	20
APC	78.6085	-0.869767	0.271471	-3.20391	0.00135576	0.0170358	NOT	79	82	86	87	87	54	54	91
APCDD1	18.6714	0.185473	0.529547	0.350249	0.726151	0.876777	NOT	18	17	8	13	31	20	22	25
APEH	155.171	-0.212324	0.29122	-0.729086	0.465949	0.719505	NOT	145	82	139	190	268	189	82	230
APEX1	139.506	-0.800361	0.313292	-2.55468	0.0106286	0.0774595	NOT	140	91	193	173	173	56	108	202
APEX2	26.1982	-0.394117	0.482988	-0.815998	0.414501	0.678738	NOT	41	12	22	24	30	17	24	47
APH1A	229.18	0.722402	0.304158	2.37509	0.0175449	0.107819	NOT	146	113	149	166	412	496	134	450
API5	292.72	0.167674	0.251331	0.667142	0.504681	0.7449	NOT	278	167	321	164	499	290	204	721
APIP	56.3204	-0.0513546	0.423815	-0.121172	0.903555	0.959865	NOT	78	40	57	16	89	46	51	106
APITD1	14.8623	-0.239647	0.723516	-0.331225	0.740474	0.883718	NOT	17	24	5	4	13	11	20	20
APLF	119.3	-0.441188	0.312852	-1.41021	0.158477	0.414991	NOT	79	156	120	92	165	137	71	151
APLNR	14.2444	0.815772	0.618138	1.31972	0.186927	0.450938	NOT	7	7	14	7	38	30	6	24
APLP1	28.0748	0.505591	0.471937	1.07131	0.28403	0.560083	NOT	24	20	9	22	46	25	30	75
APLP2	308.89	0.36197	0.356348	1.01578	0.309736	0.584545	NOT	209	291	164	207	414	666	168	527
LOC100525112	96.0195	3.00333	0.418936	7.16894	7.55822e-13	2.28665e-10	UP	8	23	30	10	224	286	120	222
LOC106509607	18.8486	2.98518	0.823672	3.62423	0.000289818	0.00507354	UP	3	6	5	0	52	29	4	125
APOA4	10457.2	1.45949	0.982803	1.48503	0.137535	0.381023	NOT	705	7025	1873	7969	14142	41487	3516	16127
SLC2A1	50.1436	2.94671	0.595867	4.94525	7.60461e-07	4.02362e-05	UP	0	8	17	14	119	167	32	151
APOBEC1	48.5116	0.681119	0.379273	1.79585	0.0725178	0.266375	NOT	32	25	38	30	110	35	41	155
APOBEC3B	37.6167	-0.66435	0.405577	-1.63804	0.101414	0.320144	NOT	44	30	32	46	36	20	28	72
APOBR	14.7123	1.3214	0.987809	1.33771	0.180991	0.442424	NOT	12	14	0	0	71	9	10	34
HBEGF	24.9212	2.9413	0.659887	4.45728	8.30068e-06	0.000291045	UP	5	1	12	2	48	87	20	72
APOE	192.818	0.480273	0.277	1.73384	0.0829468	0.287345	NOT	140	133	177	87	343	270	119	507
APOLD1	15.4815	-0.334378	0.706431	-0.473335	0.635974	0.827145	NOT	15	20	2	17	11	23	13	18
APOM	14.4411	0.0908439	0.641681	0.141572	0.887418	0.952987	NOT	4	13	7	21	22	12	17	24
APOO	39.2271	-0.684336	0.36687	-1.86534	0.0621338	0.241475	NOT	38	42	37	42	42	34	18	70
APOOL	62.774	-0.511902	0.41539	-1.23234	0.217822	0.48926	NOT	105	22	55	65	98	45	49	77
APOPT1	229.369	0.725052	0.246657	2.93951	0.00328726	0.0332819	NOT	206	112	136	118	434	344	223	486
APP	272.45	0.279382	0.254792	1.09651	0.272856	0.549203	NOT	225	193	162	225	420	432	200	496
APPBP2	101.193	-0.320211	0.26864	-1.19197	0.233273	0.506124	NOT	88	104	89	86	150	89	86	136
APPL1	16.5446	-0.393924	0.680101	-0.579213	0.562445	0.78353	NOT	5	18	36	5	15	15	18	21
APPL2	46.4677	-0.0202107	0.369713	-0.0546659	0.956405	0.982515	NOT	51	21	46	40	80	47	25	106
APRT	179.914	0.122326	0.240579	0.508463	0.611128	0.811726	NOT	113	130	214	122	324	225	125	325
APTX	41.1261	0.137396	0.423237	0.324631	0.74546	0.886504	NOT	22	36	26	44	93	55	19	69
AQP1	179.283	-0.135497	0.284439	-0.476364	0.633815	0.826119	NOT	145	165	163	144	218	282	103	275
GPR132	13.3718	2.93451	0.862436	3.40259	0.000667507	0.0098559	UP	8	2	0	0	42	30	20	27
AQP11	31.8931	0.757189	0.511254	1.48104	0.138595	0.382703	NOT	25	6	29	21	53	75	18	62
AQP3	21.4402	1.58778	0.880415	1.80345	0.0713176	0.264699	NOT	2	11	10	12	28	100	12	3
AQP7	23.1396	2.88965	0.796307	3.62881	0.000284729	0.00500673	UP	10	1	0	7	58	89	10	55
SCT	14.6006	2.87577	0.93357	3.0804	0.00206719	0.0237265	UP	0	6	0	5	32	37	4	77
AQR	26.5349	-0.111503	0.450857	-0.247313	0.804666	0.916965	NOT	15	32	27	16	37	23	24	49
ARAF	193.876	0.0280025	0.260658	0.10743	0.914448	0.963811	NOT	160	109	166	205	368	246	108	337
ARAP1	249.255	-0.061326	0.245872	-0.249422	0.803034	0.916519	NOT	257	146	202	241	391	271	144	534
ARAP2	32.7866	0.0913644	0.545712	0.167422	0.867038	0.943308	NOT	59	19	14	12	54	45	17	68
ARAP3	35.0031	0.146912	0.482795	0.304293	0.760904	0.894035	NOT	9	38	40	23	61	48	18	74
ARCN1	649.76	-0.337314	0.192424	-1.75297	0.0796069	0.281897	NOT	725	477	636	571	906	512	457	1222
AREG	24.0875	-0.406808	0.58669	-0.693394	0.488062	0.732928	NOT	12	27	15	34	27	9	33	30
AREL1	333.697	0.887309	0.273993	3.23843	0.00120188	0.0155153	NOT	173	152	304	163	669	679	240	679
ARF1	1225.34	0.0534759	0.160876	0.332404	0.739584	0.883561	NOT	1127	777	1126	976	2140	1262	913	2397
ARF2	40.1713	0.552099	0.541579	1.01942	0.308002	0.58267	NOT	51	5	34	21	99	26	51	75
ARF3	303.916	0.682532	0.329475	2.07157	0.0383053	0.181535	NOT	268	118	141	244	765	238	243	893
ARF4	453.875	-0.55788	0.218825	-2.54944	0.0107897	0.0781988	NOT	511	421	374	465	555	322	310	777
ARF5	146.771	1.19629	0.34164	3.5016	0.000462469	0.007354	NOT	64	82	78	69	278	378	98	297
ARF6	598.361	0.0300889	0.198869	0.1513	0.879739	0.949684	NOT	470	554	488	427	1001	567	483	1182
ARFGAP1	524.676	0.409377	0.235633	1.73735	0.0823258	0.286533	NOT	265	296	468	478	994	761	362	1093
ARFGAP2	236.326	0.418445	0.253518	1.65055	0.0988299	0.316015	NOT	141	167	210	154	409	397	150	477
ARFGAP3	442.45	0.560311	0.230462	2.43125	0.0150468	0.0984811	NOT	253	302	274	344	851	642	304	1070
ARFGEF1	129.819	0.0671116	0.237498	0.282578	0.7775	0.903104	NOT	105	107	119	88	206	118	116	264
ARFGEF2	79.2238	0.0771588	0.330225	0.233655	0.815252	0.920864	NOT	76	34	99	54	110	88	54	192
ARFGEF3	25.0607	-0.928383	0.497191	-1.86726	0.0618659	0.240909	NOT	13	18	52	30	26	14	14	40
ARFIP1	245.708	0.15309	0.208674	0.733634	0.463172	0.717847	NOT	225	171	177	194	442	276	181	491
ARFIP2	253.656	0.34671	0.241168	1.43763	0.15054	0.402862	NOT	130	157	289	177	397	345	218	525
ARFRP1	89.4824	-0.103701	0.319331	-0.324745	0.745374	0.886504	NOT	68	93	83	60	167	119	50	119
ARG2	36.1159	-0.564356	0.559483	-1.00871	0.313114	0.58832	NOT	80	10	29	25	39	47	24	33
ARGLU1	129.805	-0.328283	0.25979	-1.26364	0.206358	0.476201	NOT	103	94	171	117	174	100	122	192
ARHGAP1	172.858	-0.471971	0.257285	-1.83443	0.0665907	0.253329	NOT	201	121	142	199	254	171	115	210
ARHGAP10	81.1852	-0.254418	0.31317	-0.812394	0.416566	0.680191	NOT	77	62	60	91	115	109	49	109
GDPD1	14.5202	2.86186	0.894015	3.20113	0.00136888	0.0171641	UP	0	7	1	3	17	61	9	40
ARHGAP12	94.5279	-0.0543364	0.355106	-0.153015	0.878387	0.949266	NOT	105	45	109	66	153	57	113	147
ARHGAP15	32.0894	-0.264949	0.38357	-0.690743	0.489727	0.733378	NOT	29	23	35	30	47	21	26	63
ARHGAP17	291.874	-0.927112	0.216361	-4.28502	1.82725e-05	0.000561452	NOT	281	259	308	416	314	217	169	349
ARHGAP18	174.47	-0.0607347	0.27325	-0.222268	0.824105	0.924123	NOT	109	167	203	112	267	138	167	321
ARHGAP19	50.1325	-0.695659	0.465385	-1.4948	0.134966	0.376914	NOT	77	13	58	62	78	25	38	61
ARHGAP20	14.857	0.937658	0.644206	1.45553	0.145524	0.394063	NOT	9	9	13	3	26	8	24	44
ARHGAP21	118.957	-0.194292	0.288974	-0.67235	0.501361	0.741949	NOT	115	61	141	111	159	161	85	158
ARHGAP22	25.2868	0.00624874	0.498777	0.0125281	0.990004	0.996678	NOT	10	28	27	18	37	15	25	59
ARHGAP24	26.8625	-0.117103	0.477088	-0.245453	0.806106	0.91763	NOT	18	17	22	35	34	17	34	43
ARHGAP25	66.2925	0.489744	0.34367	1.42504	0.154145	0.408342	NOT	50	36	57	42	143	46	56	193
ARHGAP26	166.877	0.348759	0.288004	1.21095	0.225913	0.498183	NOT	110	91	123	164	315	244	88	381
ARHGAP27	200.764	0.48676	0.239432	2.03298	0.0420543	0.191602	NOT	181	109	148	118	406	193	188	482
SLC9A3	573.632	2.83769	0.592074	4.7928	1.64471e-06	7.67034e-05	UP	38	148	241	50	1605	1446	549	1764
ARHGAP29	57.3411	-0.492335	0.414059	-1.18905	0.234421	0.506734	NOT	84	54	25	53	55	60	42	85
ARHGAP30	52.1015	0.570896	0.475166	1.20146	0.229571	0.502357	NOT	45	50	31	10	126	45	37	147
ARHGAP31	54.9721	-0.572358	0.331689	-1.72559	0.0844217	0.289983	NOT	51	52	50	63	79	61	28	63
ARHGAP32	61.9294	0.303837	0.354674	0.856665	0.39163	0.658709	NOT	66	38	37	42	114	56	43	172
ARHGAP35	295.364	0.357641	0.240463	1.4873	0.136935	0.379824	NOT	271	179	164	236	611	321	239	622
ARHGAP39	43.3094	-0.727565	0.584443	-1.24489	0.213174	0.484258	NOT	44	5	96	45	43	48	34	30
ARHGAP4	139.498	1.00518	0.403263	2.49261	0.0126808	0.0874977	NOT	62	124	87	28	370	149	109	429
ARHGAP42	54.37	0.284391	0.411327	0.6914	0.489314	0.733097	NOT	74	24	40	25	71	72	59	96
ARHGAP45	91.2366	1.05031	0.330257	3.18027	0.00147137	0.0181977	NOT	56	53	42	44	193	119	63	325
ARHGAP5	207.572	-0.170624	0.244384	-0.698181	0.485064	0.731658	NOT	238	142	152	192	271	225	158	365
ARHGAP6	23.7064	-0.505768	0.475077	-1.0646	0.287056	0.562714	NOT	27	22	15	26	20	23	21	33
ARHGAP8	35.1256	-0.274304	0.488108	-0.561974	0.574134	0.78935	NOT	33	7	39	52	56	35	20	62
ARHGAP9	76.6987	1.04554	0.3915	2.67059	0.00757184	0.0606614	NOT	30	58	38	37	214	79	47	264
ARHGDIA	1650.27	0.22812	0.193595	1.17834	0.238661	0.512179	NOT	1271	1012	1401	1372	3531	1576	1142	3638
ARHGDIB	383.944	0.479414	0.244621	1.95982	0.0500166	0.211598	NOT	243	277	282	255	949	315	315	916
ARHGEF1	235.89	-0.185024	0.269879	-0.685582	0.492976	0.735445	NOT	171	144	343	197	339	198	146	546
ARHGEF10	43.9372	-0.472026	0.445066	-1.06057	0.288883	0.563978	NOT	53	60	32	19	68	43	31	46
ARHGEF10L	72.3749	0.381919	0.326827	1.16857	0.242578	0.515801	NOT	54	38	62	55	97	117	79	106
ARHGEF11	134.548	-0.0159131	0.273333	-0.0582185	0.953575	0.981609	NOT	103	125	128	89	178	192	105	202
ARHGEF12	129.867	-0.227033	0.32803	-0.69211	0.488868	0.733086	NOT	142	85	110	128	264	62	90	258
ARHGEF15	16.9158	-0.295178	0.603635	-0.489001	0.624841	0.820078	NOT	18	6	15	24	26	18	4	40
ARHGEF16	1095.39	-0.368681	0.205158	-1.79706	0.0723267	0.266139	NOT	756	1059	1188	1075	1356	1230	747	1595
ARHGEF17	81.4631	-0.362891	0.381429	-0.951399	0.341402	0.612198	NOT	103	98	47	46	100	94	61	104
ARHGEF18	396.793	0.643951	0.244556	2.63314	0.00845997	0.0657138	NOT	206	286	294	234	665	713	314	821
ARHGEF19	121.874	-0.169193	0.438986	-0.385418	0.699927	0.863711	NOT	61	154	162	50	229	76	51	326
ARHGEF2	215.522	-0.015496	0.222467	-0.0696552	0.944468	0.977868	NOT	170	186	213	149	375	240	131	420
ARHGEF25	81.7448	-0.658894	0.384677	-1.71285	0.0867402	0.293697	NOT	92	63	82	93	70	83	82	55
ARHGEF26	51.0441	-0.554399	0.421479	-1.31536	0.188388	0.45243	NOT	78	60	32	26	66	38	35	80
ARHGEF28	75.0168	-0.023706	0.379707	-0.0624322	0.950219	0.980038	NOT	52	48	104	52	112	125	58	69
ARHGEF3	25.6027	0.329714	0.534859	0.616451	0.537597	0.768209	NOT	20	25	8	19	42	40	29	25
ARHGEF33	15.8941	-0.028928	0.690262	-0.0419087	0.966571	0.985996	NOT	17	19	14	2	24	28	12	12
ARHGEF37	212.305	1.03422	0.291991	3.54195	0.000397179	0.00655428	NOT	94	149	132	82	525	352	145	543
ARHGEF39	71.1594	-0.996015	0.447737	-2.22456	0.0261111	0.139767	NOT	41	41	150	94	63	42	67	52
ARHGEF40	53.1098	-0.341621	0.368863	-0.926146	0.35437	0.623969	NOT	50	29	82	41	60	69	39	67
ARHGEF5	208.856	0.372562	0.214832	1.7342	0.0828829	0.287313	NOT	177	104	189	141	420	239	172	435
ARHGEF6	72.7873	0.482149	0.289358	1.66627	0.0956591	0.310211	NOT	52	49	46	52	135	80	84	135
ARHGEF7	222.604	0.316619	0.232654	1.3609	0.173546	0.433461	NOT	122	134	208	199	381	236	183	539
ARID1A	180.906	-0.250152	0.233126	-1.07304	0.283255	0.559538	NOT	196	127	192	140	212	206	135	300
ARID1B	168.675	0.29107	0.240361	1.21097	0.225906	0.498183	NOT	119	90	187	116	307	230	146	276
ARID2	71.8319	0.30497	0.381296	0.799825	0.423812	0.685854	NOT	59	21	101	41	111	98	71	123
ARID3A	62.6333	0.310162	0.406834	0.76238	0.445833	0.703572	NOT	24	26	74	67	114	54	45	179
LOC102166539	15.0952	2.77213	0.842168	3.29165	0.000996003	0.013488	UP	10	0	3	0	43	43	15	35
ARID4A	58.0829	0.14925	0.352068	0.423923	0.671622	0.847696	NOT	62	37	59	26	95	50	61	112
ARID4B	126.297	0.32911	0.290616	1.13246	0.257442	0.532532	NOT	74	88	133	79	184	214	108	201
ARID5A	75.3693	0.174573	0.354278	0.492758	0.622184	0.818654	NOT	57	56	49	70	144	41	81	162
ARID5B	58.1966	0.270716	0.381792	0.709065	0.478284	0.727132	NOT	67	22	32	54	94	63	47	140
ARIH1	110.099	-0.717858	0.333124	-2.15493	0.0311674	0.156962	NOT	170	58	93	134	135	70	75	161
ARIH2	145.038	-0.704814	0.228116	-3.08972	0.00200346	0.0231318	NOT	138	124	163	171	172	100	104	199
ARL1	99.306	-0.331481	0.29449	-1.12561	0.260331	0.536258	NOT	79	78	122	92	158	56	70	203
MZB1	100.453	2.76089	0.915	3.01736	0.00254984	0.0277798	UP	9	44	14	14	520	30	49	524
ARL11	15.5786	0.877851	0.736785	1.19146	0.233472	0.506124	NOT	4	10	1	20	44	12	17	37
ARL13B	14.8105	-0.450008	0.813564	-0.553132	0.580173	0.793217	NOT	17	0	26	17	27	22	3	16
ARL14	45.5846	-0.481021	0.505419	-0.951727	0.341236	0.612198	NOT	24	30	115	18	78	38	28	60
ARL14EP	63.1422	0.0607644	0.507955	0.119626	0.90478	0.959865	NOT	23	106	33	31	63	65	68	129
ARL15	70.8414	0.234638	0.287753	0.815414	0.414835	0.678868	NOT	61	45	70	42	132	67	59	157
ARL16	168.691	0.0894804	0.360818	0.247993	0.80414	0.916771	NOT	51	182	145	154	280	214	155	226
ARL2	141.169	0.21831	0.291723	0.748347	0.454251	0.709989	NOT	92	85	187	79	232	130	158	259
ARL2BP	45.6191	-0.453729	0.343409	-1.32125	0.186417	0.450485	NOT	51	29	63	35	56	37	34	76
ARL3	46.1682	-0.335045	0.447162	-0.749269	0.453695	0.709308	NOT	54	50	39	24	63	37	55	38
ARL4A	127.705	-0.653934	0.257543	-2.53913	0.0111128	0.0797083	NOT	106	107	141	163	147	114	94	147
ARL4C	55.2087	0.284115	0.447525	0.634857	0.525521	0.759903	NOT	15	71	35	38	96	76	44	100
ARL5A	308.855	0.297289	0.239496	1.24131	0.214491	0.485475	NOT	261	199	312	157	584	310	228	760
ARL5B	135.236	0.252353	0.282612	0.892932	0.371894	0.640611	NOT	133	57	105	118	254	124	112	312
ARL6	12.6587	-0.129045	0.668086	-0.193157	0.846836	0.934252	NOT	12	2	13	18	14	10	10	32
ARL6IP1	462.138	0.877075	0.209815	4.18023	2.9122e-05	0.000831988	NOT	194	222	386	293	962	669	429	1133
ARL6IP4	106.068	-0.158711	0.297048	-0.534293	0.593139	0.801656	NOT	53	88	134	99	169	111	89	145
ARL6IP5	16.5323	-0.422134	0.557734	-0.756873	0.449126	0.705906	NOT	15	17	20	11	40	12	9	16
ARL6IP6	102.485	0.00717009	0.298634	0.0240096	0.980845	0.992538	NOT	98	46	134	70	148	122	87	173
ARL8A	54.1278	-0.130195	0.37513	-0.347067	0.728541	0.877847	NOT	66	39	37	43	59	74	49	71
ARL8B	152.167	-0.225835	0.220453	-1.02441	0.30564	0.580468	NOT	127	131	177	111	214	149	116	257
ARMC1	87.935	0.107849	0.311117	0.34665	0.728854	0.878063	NOT	70	39	107	71	135	120	80	124
ARMC10	74.4902	-0.254661	0.349439	-0.728769	0.466143	0.719513	NOT	83	61	71	52	106	46	87	98
ARMC5	24.5434	0.204539	0.494172	0.413902	0.678946	0.852237	NOT	26	11	24	16	51	12	23	60
ARMC6	47.3751	0.28995	0.422985	0.685485	0.493038	0.735445	NOT	45	46	36	12	88	55	44	84
ARMC7	117.145	0.612829	0.294109	2.08368	0.0371893	0.178517	NOT	55	54	93	108	199	188	93	269
ARMC8	31.1411	-0.240011	0.710014	-0.338038	0.735335	0.880834	NOT	50	0	51	17	43	37	25	39
ARMCX3	36.4555	0.127916	0.456998	0.279904	0.779551	0.904328	NOT	26	27	40	23	69	16	50	58
ARMCX5	17.3114	-0.101622	0.724781	-0.140211	0.888493	0.953464	NOT	25	9	26	1	14	15	23	28
ARMT1	32.6355	-0.183484	0.408814	-0.448819	0.653562	0.837323	NOT	42	15	29	30	48	27	27	60
ARNT	61.5696	0.262339	0.370367	0.708322	0.478745	0.727564	NOT	29	67	37	47	95	63	65	123
ARNTL	39.5327	-1.06998	0.448817	-2.384	0.0171256	0.106182	NOT	57	33	24	61	31	20	21	67
ARPC1A	612.593	0.510278	0.22822	2.23591	0.025358	0.136984	NOT	539	303	411	425	1087	874	427	1523
ARPC1B	971.148	0.214092	0.227048	0.94294	0.345712	0.615613	NOT	821	678	572	871	1718	1077	664	2268
ARPC2	801.847	-0.473055	0.184102	-2.56953	0.0101836	0.075192	NOT	725	733	822	799	1141	554	553	1373
ARPC3	623.575	-0.179327	0.20356	-0.880954	0.378343	0.64706	NOT	620	369	593	628	1072	511	466	1097
ARPC4	720.679	0.793857	0.210413	3.77285	0.000161396	0.00322219	NOT	435	365	588	379	1706	1136	522	1575
ARPC5	290.082	-0.416387	0.266823	-1.56054	0.118633	0.349513	NOT	308	305	286	190	465	170	215	496
ARPC5L	78.3906	-0.755762	0.288698	-2.61783	0.0088491	0.0682503	NOT	96	77	87	65	95	47	57	106
ARPIN	104.679	-0.286746	0.313814	-0.913746	0.36085	0.629927	NOT	128	41	119	101	145	109	75	164
ARPP19	230.134	-0.0534933	0.236604	-0.226088	0.821133	0.922802	NOT	154	185	250	191	376	170	217	429
ARRB1	242.778	-0.202213	0.244291	-0.827753	0.407811	0.672785	NOT	272	195	188	197	320	256	221	336
ARRB2	129.456	0.244933	0.306545	0.799012	0.424283	0.686199	NOT	81	138	96	70	235	140	90	306
ARRDC1	248.745	0.627564	0.231297	2.71324	0.00666291	0.0557558	NOT	125	143	228	158	451	374	266	437
ARRDC2	160.475	0.622654	0.256953	2.42322	0.0153837	0.0999515	NOT	79	128	104	102	323	175	159	383
ARRDC3	110.25	0.134802	0.32171	0.419018	0.675203	0.849639	NOT	82	100	102	62	182	69	123	233
ARRDC4	245.609	-0.162807	0.205917	-0.790645	0.429151	0.690936	NOT	226	215	212	200	324	269	181	441
ARSA	93.8243	0.374877	0.514897	0.728062	0.466576	0.719683	NOT	20	100	60	83	111	236	43	140
ARV1	41.9136	0.014184	0.489682	0.0289658	0.976892	0.990151	NOT	16	62	39	17	55	58	35	64
ARVCF	57.3438	-0.198448	0.352025	-0.563734	0.572935	0.788898	NOT	50	61	33	54	77	66	36	104
AS3MT	126.947	-0.230727	0.23199	-0.994553	0.319954	0.59412	NOT	109	101	130	116	186	130	74	244
ASAH1	58.8925	0.449064	0.319781	1.40429	0.160234	0.41634	NOT	47	37	39	42	121	64	40	154
ASAH2	213.152	0.57953	0.465237	1.24567	0.212886	0.483791	NOT	66	226	94	157	294	562	134	251
ASAP1	81.7787	-0.105152	0.45684	-0.230172	0.817958	0.921606	NOT	147	45	31	54	130	54	63	188
ASAP2	71.6132	-0.305409	0.324603	-0.940869	0.346772	0.616292	NOT	72	35	94	67	88	90	50	99
ASAP3	27.3197	-0.973693	0.561627	-1.7337	0.082971	0.287345	NOT	28	15	41	38	34	26	20	7
ASB1	54.2158	0.696559	0.35751	1.94836	0.0513716	0.214764	NOT	45	15	38	41	106	84	49	112
ASB13	754.354	0.753676	0.274071	2.74992	0.0059609	0.0517152	NOT	266	494	725	396	1388	1331	681	1471
ASB14	19.3411	0.411704	0.488019	0.843624	0.398879	0.664461	NOT	16	13	18	8	30	25	22	34
ASB2	57.9364	-0.330271	0.489679	-0.674465	0.500016	0.740701	NOT	87	49	22	50	118	36	59	44
ASB3	25.2851	-0.380099	0.499974	-0.760237	0.447113	0.704599	NOT	11	31	39	14	32	22	22	36
ASB6	39.5694	0.207445	0.388262	0.534292	0.593139	0.801656	NOT	26	29	47	21	60	63	32	60
ASB7	43.0999	-0.149692	0.400533	-0.373733	0.708603	0.868656	NOT	37	30	32	51	67	56	16	87
ASB8	42.4081	-0.0450376	0.45837	-0.0982562	0.921729	0.967311	NOT	11	36	63	35	58	52	41	56
ASCC1	51.4337	-0.109323	0.328827	-0.332463	0.73954	0.883561	NOT	53	36	41	47	97	52	29	93
ASCC2	62.037	-0.214593	0.329747	-0.650782	0.515187	0.752546	NOT	43	39	57	83	101	59	39	112
ASCC3	68.5302	-0.0970044	0.454159	-0.213591	0.830866	0.927209	NOT	72	11	81	79	111	52	47	159
ABHD2	220.688	2.74851	0.452857	6.06926	1.28499e-09	1.648e-07	UP	34	58	21	70	428	825	220	386
ASF1A	54.205	-0.233594	0.351686	-0.664212	0.506554	0.746918	NOT	54	28	65	51	90	71	27	77
B4GALT1	142.659	2.73002	0.319608	8.54178	1.32171e-17	9.74681e-15	UP	14	29	35	46	456	237	167	498
LOC110256649	113.033	2.71573	1.02959	2.63768	0.00834745	0.0652694	UP	34	42	18	1	164	480	40	323
ASH1L	129.187	0.225833	0.316899	0.712633	0.476073	0.725922	NOT	133	62	138	69	183	213	101	210
ASH2L	84.1009	-0.485456	0.33138	-1.46495	0.142934	0.389756	NOT	106	57	107	61	122	53	43	180
ASL	246.891	0.192646	0.261488	0.736728	0.461288	0.716124	NOT	154	223	200	179	586	215	177	477
ASMTL	58.4487	0.388559	0.307096	1.26527	0.205775	0.475321	NOT	42	34	48	44	103	88	53	94
ASNA1	123.797	-0.715373	0.235172	-3.04191	0.00235084	0.02619	NOT	144	109	144	115	175	85	69	178
STIM1	105.909	2.71172	0.363447	7.4611	8.58002e-14	3.16361e-11	UP	31	25	28	9	322	253	99	311
ASNSD1	52.123	0.227936	0.324926	0.701501	0.482991	0.730616	NOT	44	37	49	30	85	49	44	127
ASPH	16.8125	-0.269849	0.557475	-0.484055	0.628347	0.823087	NOT	19	20	15	6	26	20	9	26
ASPM	34.4443	-0.454676	0.437551	-1.03914	0.29874	0.574534	NOT	26	17	45	46	44	34	32	32
ASPN	27.6228	-0.768862	0.475266	-1.61775	0.105716	0.328177	NOT	18	22	39	37	34	19	26	20
ASPRV1	19.8211	-0.3368	0.537129	-0.627038	0.530634	0.763596	NOT	11	19	12	30	37	21	10	26
ASPSCR1	589.633	0.814007	0.214684	3.79165	0.000149652	0.00306021	NOT	326	337	463	299	1209	1023	451	1309
ASRGL1	772.594	0.990027	0.279341	3.54416	0.000393872	0.00651795	NOT	388	374	540	425	1946	1017	401	2609
ASS1	1012.15	-1.32679	0.712003	-1.86346	0.0623982	0.242183	NOT	1117	622	219	2732	907	600	532	921
ASTE1	20.9896	0.0986631	0.494303	0.1996	0.841793	0.932087	NOT	23	6	24	16	35	20	19	41
ASXL1	184.476	0.114505	0.278303	0.41144	0.68075	0.853034	NOT	95	118	173	204	342	243	141	269
ASXL2	134.851	0.593968	0.257088	2.31037	0.0208676	0.12189	NOT	71	95	120	71	242	207	123	269
ATAD1	35.5884	-0.504426	0.403024	-1.2516	0.210714	0.481545	NOT	41	20	35	43	49	42	22	37
ATAD2	49.0422	-0.649376	0.407371	-1.59406	0.110922	0.336233	NOT	67	19	61	55	60	37	43	50
ATAD2B	20.8589	-1.05009	0.550333	-1.90809	0.0563794	0.227223	NOT	31	22	31	10	13	10	12	39
ATAD5	21.0104	-0.798298	0.612767	-1.30278	0.192651	0.458654	NOT	21	12	28	28	11	27	20	9
ATAT1	29.706	-0.375529	0.451755	-0.831266	0.405824	0.670841	NOT	21	16	54	24	35	30	27	37
ATE1	95.111	0.102854	0.326259	0.315254	0.752569	0.888792	NOT	39	65	99	103	164	85	96	166
ATF1	85.2985	-0.114718	0.357527	-0.320864	0.748313	0.887266	NOT	83	39	136	47	114	111	65	129
ATF2	100.149	0.336818	0.261032	1.29033	0.196935	0.463903	NOT	71	65	99	60	160	119	109	180
ATF3	90.8517	1.04381	0.474587	2.19941	0.0278486	0.145694	NOT	112	31	24	27	145	182	106	170
ATF4	1812.07	-0.251613	0.218516	-1.15146	0.249543	0.522511	NOT	1334	1008	2176	2126	2905	1656	1275	2986
ATF5	147.022	0.742871	0.36427	2.03935	0.0414156	0.189993	NOT	70	92	73	125	353	194	62	462
ATF6	56.8453	0.145125	0.383504	0.378418	0.70512	0.866637	NOT	43	33	82	27	134	47	38	115
ATF6B	135.138	0.106306	0.218452	0.486636	0.626517	0.821272	NOT	109	83	133	110	219	162	105	253
ATF7	85.0155	-0.227475	0.285353	-0.797171	0.425352	0.686595	NOT	81	53	112	63	116	77	78	130
ATF7IP	95.8212	-0.0542178	0.2607	-0.20797	0.835252	0.928095	NOT	88	64	89	84	139	83	75	211
ATG10	24.8759	-0.0140711	0.597307	-0.0235575	0.981206	0.992817	NOT	9	25	46	5	35	26	26	37
ATG101	87.8341	-0.0131666	0.286665	-0.0459301	0.963366	0.984979	NOT	69	77	91	55	127	121	65	136
ATG12	45.5863	-0.387182	0.37437	-1.03422	0.301031	0.576602	NOT	51	31	42	48	46	41	25	106
ATG13	245.836	1.16393	0.245643	4.73831	2.15513e-06	9.52373e-05	NOT	122	121	174	90	599	440	206	568
ATG14	19.5158	0.0908833	0.588319	0.15448	0.877232	0.94864	NOT	21	4	16	23	41	29	7	34
ATG16L1	115.334	0.273955	0.28657	0.955976	0.339084	0.610487	NOT	50	83	100	113	194	136	94	249
ATG16L2	21.7332	0.849658	0.531072	1.59989	0.109623	0.334288	NOT	10	9	11	21	25	45	24	43
ATG2A	90.9137	1.12783	0.374264	3.01347	0.00258279	0.0280095	NOT	50	53	59	27	195	211	54	200
ATG2B	58.9188	0.386445	0.35697	1.08257	0.279	0.554306	NOT	58	24	31	56	109	72	49	126
ATG3	123.52	-0.164103	0.289657	-0.566545	0.571024	0.787923	NOT	121	95	94	120	225	76	91	252
ATG4A	44.0338	-0.0420044	0.34754	-0.120862	0.9038	0.959865	NOT	34	25	60	33	74	45	30	86
ATG4B	27.205	-0.511241	0.443493	-1.15276	0.249009	0.522043	NOT	20	20	47	22	33	17	20	51
ATG4C	37.3831	0.0693846	0.512154	0.135476	0.892235	0.955432	NOT	29	53	25	9	52	38	42	58
ATG4D	159.714	0.640651	0.264737	2.41995	0.0155225	0.100577	NOT	112	103	128	72	354	242	108	351
ATG5	102.325	-0.146447	0.328703	-0.445528	0.655938	0.839052	NOT	141	56	98	65	162	74	77	219
ATG7	40.5807	-0.334839	0.423439	-0.79076	0.429084	0.690936	NOT	33	37	42	38	57	63	12	60
TMEM37	261.658	2.70917	0.401236	6.75205	1.45767e-11	2.96535e-09	UP	27	65	76	62	593	917	175	653
ATIC	33.157	-1.1136	0.465365	-2.39297	0.0167127	0.104656	NOT	33	20	79	25	32	20	23	31
ATL2	150.558	0.544092	0.315213	1.72611	0.0843276	0.289829	NOT	132	55	115	109	230	289	109	293
ATL3	66.3929	-0.139996	0.30707	-0.45591	0.648454	0.835001	NOT	46	55	86	47	113	57	44	132
ATM	41.9909	-0.121251	0.403786	-0.300287	0.763959	0.896181	NOT	29	24	39	53	48	37	50	62
ATMIN	72.5951	-0.203366	0.285017	-0.713521	0.475524	0.725741	NOT	56	73	74	53	113	78	50	114
ATN1	244.859	0.0405194	0.219701	0.18443	0.853676	0.937753	NOT	218	170	194	216	397	318	154	456
ATOH1	20.5358	-0.461943	0.575011	-0.803364	0.421765	0.684418	NOT	18	31	7	19	33	11	17	30
ATOH8	29.8736	-0.513173	0.626486	-0.819129	0.412713	0.677179	NOT	40	36	33	6	40	6	34	46
ATOX1	283.657	0.673582	0.24643	2.73336	0.00626925	0.0531374	NOT	169	174	153	221	733	327	223	634
ATP10A	12.982	-0.423149	0.882937	-0.479252	0.63176	0.82491	NOT	15	1	13	21	16	8	21	2
ATP10B	128.469	1.03254	0.266376	3.87626	0.000106074	0.00234816	NOT	72	51	98	63	279	237	104	295
ATP10D	13.1301	1.47744	0.779987	1.89418	0.0582013	0.231921	NOT	4	6	0	12	23	31	17	22
ATP11A	186.243	0.781168	0.444121	1.75891	0.0785932	0.280055	NOT	34	75	221	141	302	424	178	236
ATP11B	74.8443	-0.404529	0.332689	-1.21594	0.224009	0.496633	NOT	87	78	65	48	86	87	58	90
ATP11C	27.9463	-0.522057	0.436472	-1.19608	0.231664	0.503987	NOT	14	24	35	37	35	22	18	48
ATP13A1	141.449	-0.257429	0.264178	-0.974451	0.329832	0.602429	NOT	81	122	167	143	219	159	92	206
ATP13A2	73.5619	0.166026	0.361397	0.459399	0.645947	0.833501	NOT	40	27	103	68	120	85	73	119
ATP13A3	67.0004	0.112201	0.330654	0.339331	0.73436	0.880561	NOT	79	38	52	45	105	57	58	156
ATP1A1	1087.42	0.949062	0.365087	2.59955	0.00933463	0.0707836	NOT	419	583	557	876	1608	3022	715	1765
ATP1A2	39.7338	-0.163879	0.610543	-0.268416	0.788379	0.90902	NOT	57	22	27	32	33	74	43	11
ATP1B1	208.087	0.160448	0.34764	0.461535	0.644415	0.83226	NOT	91	137	190	235	249	388	156	292
ATP1B2	15.4316	0.814293	0.546311	1.49053	0.136085	0.378248	NOT	8	4	14	12	28	23	15	38
TSKU	573.564	2.69596	0.396229	6.80405	1.01721e-11	2.14323e-09	UP	67	156	186	100	1080	2123	455	1311
ATP23	20.9036	-0.637767	0.578306	-1.10282	0.270106	0.54717	NOT	21	21	26	17	25	4	12	55
ATP2A2	252.589	0.692344	0.194128	3.56644	0.000361869	0.00605629	NOT	163	123	201	159	551	352	232	512
ATP2A3	497.797	1.03436	0.256273	4.03617	5.43305e-05	0.00137859	NOT	171	224	427	281	1197	861	474	951
LOC106505208	62.6698	2.69432	0.557956	4.82892	1.37275e-06	6.55754e-05	UP	21	17	15	2	110	236	65	110
ATP2B4	140.918	-0.0905485	0.412891	-0.219304	0.826414	0.925426	NOT	165	65	99	152	148	156	195	113
ATP2C1	70.4582	-0.106952	0.339408	-0.315114	0.752675	0.888792	NOT	58	36	64	85	89	71	76	99
ATP2C2	233.833	-1.02829	0.267351	-3.84622	0.000119956	0.0025875	NOT	202	198	386	271	240	153	171	198
ATP5A1	1481.9	-0.418227	0.247493	-1.68985	0.0910558	0.301958	NOT	1815	1177	1378	1235	2395	826	971	2875
ATP5B	1713.63	-0.36234	0.249823	-1.45038	0.146952	0.39677	NOT	2130	1224	1596	1444	2968	994	1110	3303
ATP5C1	532.954	-0.301427	0.199513	-1.51081	0.130836	0.36949	NOT	607	382	469	490	809	436	376	946
ATP5D	1232.14	0.707568	0.21526	3.28704	0.00101247	0.0136061	NOT	851	782	895	568	2596	1945	909	2757
ATP5E	1081.2	0.173907	0.21193	0.820587	0.411881	0.676474	NOT	767	738	949	919	2348	849	835	2314
ATP5F1	617.003	-0.195669	0.210338	-0.930259	0.352237	0.622256	NOT	642	392	524	628	985	560	389	1214
ATP5G1	733.731	-0.136203	0.251225	-0.542157	0.587711	0.798342	NOT	720	607	562	633	1502	552	399	1524
ATP5G2	479.218	0.0448441	0.199318	0.224987	0.821989	0.922802	NOT	502	316	379	364	787	483	375	959
ATP5G3	995.296	-0.383549	0.2136	-1.79564	0.0725519	0.266375	NOT	1000	914	983	821	1607	671	600	1935
ATP5H	304.892	-0.34121	0.267453	-1.27577	0.202036	0.471017	NOT	297	294	292	238	487	158	253	554
ATP5I	542.721	-0.0997093	0.252284	-0.395226	0.692676	0.858948	NOT	437	333	648	475	1248	386	357	923
ATP5J	285.964	-0.46261	0.2387	-1.93804	0.0526181	0.217992	NOT	323	259	311	205	465	183	211	426
ATP5J2	457.519	-0.239675	0.281094	-0.852653	0.393852	0.661032	NOT	367	396	322	533	858	265	391	732
ATP5L	464.929	-0.0616572	0.192204	-0.32079	0.74837	0.887266	NOT	377	349	450	401	758	369	371	966
ATP5O	609.996	-0.291869	0.186761	-1.5628	0.1181	0.348723	NOT	552	498	609	565	962	445	498	997
ATP5S	43.084	0.306903	0.377569	0.812839	0.41631	0.679962	NOT	41	32	22	31	95	48	28	91
ATP5SL	340.448	0.615743	0.224859	2.73836	0.00617469	0.052641	NOT	255	171	294	183	813	385	259	823
ATP6	1.7888e+06	-0.857739	0.319933	-2.681	0.00734032	0.059255	NOT	2051600	2319689	1545404	1552819	1229105	1452862	1674623	1517340
ATP6AP1	187.705	0.994939	0.243616	4.08404	4.42596e-05	0.00114271	NOT	97	92	145	86	380	346	163	421
ATP6AP2	97.1835	0.276677	0.338893	0.816414	0.414263	0.678738	NOT	62	68	88	74	143	190	51	169
LOC110256841	18.9258	2.68124	0.825436	3.24827	0.00116109	0.015121	UP	0	4	14	0	51	52	13	62
ATP6V0A2	34.2468	-0.358161	0.422802	-0.847112	0.396933	0.663411	NOT	28	29	39	32	41	54	14	47
ATP6V0B	134.738	0.597338	0.404591	1.4764	0.139837	0.384241	NOT	33	94	98	128	245	285	98	189
ATP6V0C	789.19	0.745559	0.21283	3.50307	0.000459928	0.00734329	NOT	408	453	526	563	1662	1329	596	1663
ATP6V0D1	237.74	0.924793	0.213295	4.33575	1.45267e-05	0.000459947	NOT	153	125	136	128	541	369	199	562
ATP6V0E1	193.444	0.623019	0.215596	2.88976	0.00385539	0.0374402	NOT	113	101	149	144	387	276	193	354
ATP6V1A	50.9625	-0.881895	0.546413	-1.61397	0.106534	0.329055	NOT	32	28	51	110	72	10	23	108
ATP6V1B2	149.991	-0.547429	0.264334	-2.07098	0.0383611	0.181535	NOT	127	159	167	135	260	90	94	221
ATP6V1C1	84.444	-0.141548	0.310047	-0.456536	0.648004	0.834877	NOT	59	55	71	108	145	79	74	116
ATP6V1C2	70.2424	-0.0781201	0.355372	-0.219826	0.826007	0.925199	NOT	68	77	57	33	131	84	44	103
ATP6V1D	92.8952	-0.281631	0.315233	-0.893405	0.37164	0.640518	NOT	111	57	121	55	134	68	82	155
ATP6V1E1	371.232	-0.0668891	0.232014	-0.288298	0.773119	0.900827	NOT	408	276	262	302	651	315	272	735
ATP6V1F	169.23	-0.120631	0.30193	-0.399532	0.689501	0.857351	NOT	80	158	173	172	287	131	108	380
ATP6V1G1	267.411	-0.152117	0.192408	-0.790599	0.429178	0.690936	NOT	200	215	291	231	386	249	203	512
ATP6V1H	71.3799	-0.566009	0.295332	-1.91652	0.055299	0.224991	NOT	82	66	71	63	107	47	40	123
MFSD2A	165.835	2.67114	0.460438	5.80131	6.57976e-09	7.18839e-07	UP	16	37	51	46	383	636	89	355
ATP7B	101.223	0.248842	0.288112	0.863697	0.387754	0.655401	NOT	50	62	111	88	160	143	77	197
PVRIG	25.9384	2.67102	0.787795	3.3905	0.000697661	0.0101626	UP	0	13	10	0	94	23	31	109
ATP8A1	69.3623	0.571461	0.336197	1.69978	0.0891724	0.298702	NOT	34	46	68	38	119	115	74	103
ATP8B1	337.81	0.897535	0.266552	3.3672	0.00075935	0.0108865	NOT	147	171	278	195	585	701	298	649
ATP8B2	18.4451	-0.509745	0.662368	-0.769579	0.44155	0.70084	NOT	31	4	17	21	13	7	17	45
ATP9A	304.531	0.696015	0.288009	2.41664	0.0156644	0.100997	NOT	123	173	269	213	565	606	233	526
ATP9B	66.7224	0.354182	0.417667	0.848001	0.396438	0.663014	NOT	19	55	69	52	119	117	32	135
ATPAF1	135.701	-0.407098	0.288635	-1.41042	0.158414	0.414991	NOT	167	99	112	133	181	82	102	268
ATPAF2	165.032	0.881545	0.263188	3.34948	0.00080963	0.0114132	NOT	85	63	127	116	375	277	123	375
ATPIF1	446.53	-0.40026	0.263062	-1.52154	0.128124	0.365548	NOT	499	309	414	464	744	229	342	782
ATR	33.6913	-0.235261	0.475475	-0.494792	0.620747	0.817872	NOT	38	16	55	16	43	20	35	63
ATRAID	46.5041	0.381482	0.376122	1.01425	0.310462	0.585541	NOT	28	29	28	48	64	56	37	128
ATRIP	12.2063	0.118039	0.901073	0.130998	0.895776	0.956606	NOT	29	0	5	5	11	12	16	23
SLC40A1	1014.52	2.65693	0.386371	6.87662	6.12884e-12	1.33915e-09	UP	219	392	191	84	3082	1504	980	4422
ATRX	69.2998	-0.525145	0.294294	-1.78443	0.0743545	0.270979	NOT	83	51	75	63	77	52	53	116
ATXN1	60.9874	-0.13599	0.315928	-0.430445	0.666872	0.845659	NOT	57	57	41	53	87	54	50	116
ATXN10	70.247	-0.52088	0.283525	-1.83715	0.0661872	0.252701	NOT	63	63	94	57	89	70	39	109
ATXN1L	52.4448	-0.342599	0.376389	-0.910227	0.362703	0.631243	NOT	64	39	29	60	85	50	27	91
ATXN2	75.4503	-0.692143	0.302455	-2.28842	0.0221132	0.126167	NOT	91	59	97	64	98	49	62	85
ATXN2L	200.417	-0.109263	0.293214	-0.372639	0.709417	0.86932	NOT	122	181	294	104	316	193	146	379
ATXN3	54.0312	-0.748617	0.341618	-2.19139	0.0284237	0.147397	NOT	60	48	52	63	52	30	42	87
ATXN7	91.0749	0.0123052	0.265782	0.0462982	0.963073	0.984979	NOT	90	53	84	75	157	99	80	136
ATXN7L1	83.9374	-0.488607	0.287348	-1.7004	0.0890557	0.298429	NOT	60	70	88	107	110	63	58	142
ATXN7L2	106.374	-0.681263	0.384353	-1.77249	0.0763126	0.274949	NOT	35	107	153	142	119	73	83	145
ATXN7L3	148.155	0.801093	0.350904	2.28294	0.0224339	0.127171	NOT	116	60	101	84	294	349	93	225
ATXN7L3B	225.013	-0.009221	0.233777	-0.0394436	0.968537	0.986683	NOT	190	155	269	145	327	290	148	424
AUH	43.0732	-0.215345	0.399377	-0.539201	0.589748	0.799913	NOT	42	19	51	44	66	27	47	63
AUP1	407.581	-0.000681895	0.225778	-0.0030202	0.99759	0.998888	NOT	237	311	443	369	685	525	262	687
AURKA	64.1933	-0.977421	0.348331	-2.80601	0.00501591	0.0453162	NOT	76	36	105	73	94	34	35	70
AURKAIP1	449.117	0.35768	0.250517	1.42777	0.153359	0.407267	NOT	267	242	485	337	1065	418	301	1059
AURKB	80.7718	-0.869488	0.316718	-2.74531	0.00604542	0.0519612	NOT	66	52	124	112	94	66	35	115
AUTS2	22.9175	0.146633	0.577686	0.253828	0.799628	0.914673	NOT	16	7	31	21	44	7	22	63
AVEN	32.9559	-0.252085	0.425328	-0.592683	0.553393	0.778498	NOT	39	21	25	33	37	49	22	43
AVIL	280.932	0.23686	0.222715	1.06351	0.287551	0.563015	NOT	237	220	217	174	415	392	228	544
AVL9	105.542	-0.268522	0.327708	-0.819394	0.412562	0.677179	NOT	118	44	154	79	179	115	64	151
AVPI1	125.043	0.229968	0.233708	0.983998	0.325117	0.597795	NOT	95	76	105	107	256	125	104	239
AXIN1	148.912	-0.235175	0.253273	-0.928544	0.353126	0.622723	NOT	113	101	205	126	241	163	83	252
AXIN2	42.0792	-0.620679	0.558206	-1.11192	0.266174	0.54326	NOT	32	12	97	38	48	42	42	21
AXL	35.9517	-0.48426	0.424804	-1.13996	0.254304	0.528501	NOT	31	43	40	23	53	22	36	39
AZGP1	32.8567	-0.177827	0.555371	-0.320195	0.74882	0.887616	NOT	17	31	38	29	28	63	30	17
AZI2	151.237	0.330326	0.241881	1.36566	0.172047	0.431572	NOT	95	77	141	136	239	203	136	296
AZIN1	489.295	0.428203	0.164083	2.60968	0.00906274	0.069263	NOT	328	290	392	377	914	579	428	1073
B2M	571.562	0.348736	0.35991	0.968955	0.332567	0.60471	NOT	279	374	332	661	855	1222	306	888
B3GALNT2	52.2916	0.376481	0.401336	0.938069	0.348209	0.618101	NOT	24	46	59	23	103	81	29	107
B3GALT2	19.8512	0.960384	0.989915	0.970168	0.331963	0.604331	NOT	1	11	24	10	7	88	13	2
SLC35G1	233.34	2.65014	0.262183	10.108	5.09208e-24	1.00136e-20	UP	42	50	79	44	610	521	236	802
B3GALT5	294.321	0.567261	0.294187	1.92823	0.0538264	0.22152	NOT	95	167	323	217	576	425	284	526
B3GALT6	22.1108	0.00744859	0.522442	0.0142573	0.988625	0.995969	NOT	17	7	39	14	37	28	13	42
B3GAT3	201.927	0.57699	0.25639	2.25044	0.0244212	0.134571	NOT	139	100	118	178	318	318	189	419
B3GLCT	15.4562	0.079404	0.739903	0.107317	0.914538	0.963811	NOT	1	11	17	21	8	17	19	34
B3GNT2	28.9231	0.596814	0.477308	1.25037	0.211163	0.481824	NOT	19	15	37	8	73	30	22	69
B3GNT3	39.2168	0.0689143	0.404199	0.170496	0.86462	0.942764	NOT	16	38	44	29	77	49	26	61
B3GNT5	46.1345	0.164951	0.572415	0.288166	0.773219	0.900827	NOT	59	51	26	4	75	47	31	117
SLC16A6	18.3181	2.62544	0.763292	3.43963	0.0005825	0.00883408	UP	0	3	5	9	46	68	16	24
B3GNTL1	96.526	0.497299	0.263348	1.88837	0.0589765	0.234182	NOT	75	48	67	76	179	140	78	200
B4GALNT3	46.6804	-0.456596	0.476899	-0.957427	0.338352	0.609684	NOT	32	18	70	65	68	70	15	55
CLDN2	752.488	2.62535	0.341383	7.69033	1.46761e-14	6.18441e-12	UP	69	108	354	194	2254	1533	919	2137
B4GALT2	103.685	-0.00379782	0.31529	-0.0120455	0.990389	0.996695	NOT	81	99	73	84	152	141	97	118
B4GALT3	46.9644	0.398186	0.408485	0.974788	0.329665	0.602404	NOT	37	15	40	45	88	75	23	107
B4GALT5	220.673	0.0890196	0.239903	0.371066	0.710589	0.869551	NOT	163	191	190	161	408	253	124	471
B4GALT6	14.0629	-0.1898	0.751678	-0.252502	0.800653	0.915043	NOT	7	10	5	26	17	6	24	12
B4GALT7	64.2092	-0.381043	0.410146	-0.929043	0.352867	0.622643	NOT	20	53	110	64	78	63	43	111
B9D1	55.987	0.0826275	0.418711	0.197338	0.843563	0.932821	NOT	16	32	62	73	100	52	47	109
B9D2	40.5782	-0.101329	0.518884	-0.195282	0.845172	0.933987	NOT	14	38	41	46	60	13	32	120
BABAM1	181.26	-0.32972	0.236455	-1.39443	0.163187	0.419487	NOT	200	149	197	126	256	154	113	353
BABAM2	35.409	-0.10319	0.468343	-0.220331	0.825613	0.924935	NOT	15	24	50	35	69	49	25	30
BACE1	38.5108	0.726748	0.463327	1.56854	0.116754	0.346562	NOT	24	36	9	23	83	60	35	71
ATP2B1	665.204	2.61773	0.263785	9.92371	3.28325e-23	5.53415e-20	UP	78	166	185	187	1834	1397	793	2029
BACH1	87.3896	-0.446728	0.369034	-1.21053	0.226074	0.498396	NOT	62	60	90	123	98	42	89	152
BAD	87.7713	-0.0979615	0.315706	-0.310293	0.756338	0.891779	NOT	48	79	82	90	177	94	63	111
BAG1	496.138	0.497982	0.224478	2.2184	0.0265276	0.141118	NOT	307	339	438	285	1123	498	363	1267
BAG3	60.8032	0.31039	0.329793	0.941167	0.346619	0.616289	NOT	40	41	40	58	114	86	36	129
BAG4	87.9758	0.195931	0.298485	0.65642	0.511554	0.750258	NOT	51	43	91	91	169	97	79	146
BAG5	106.822	-0.240419	0.250816	-0.958547	0.337787	0.609318	NOT	87	77	124	99	188	107	76	143
BAG6	269.263	-0.446607	0.242027	-1.84527	0.0649977	0.24927	NOT	180	241	322	291	323	264	144	506
BAHCC1	48.0448	0.267843	0.446077	0.600442	0.548212	0.774953	NOT	20	28	69	32	56	94	29	91
BAHD1	79.837	0.606319	0.304992	1.98798	0.0468138	0.203821	NOT	61	40	67	44	202	113	67	126
BAIAP2	21.0933	0.115444	0.734341	0.157208	0.875081	0.947952	NOT	22	29	2	10	31	46	6	31
BAIAP2L1	338.788	0.0260707	0.194916	0.133754	0.893597	0.955968	NOT	311	242	284	274	549	308	267	722
BAIAP2L2	323.82	0.223243	0.29017	0.76935	0.441685	0.70084	NOT	210	251	292	236	475	598	168	586
BAIAP3	16.0316	0.182741	0.736054	0.248271	0.803925	0.916771	NOT	10	0	20	22	38	14	16	21
PADI2	13.9646	2.61312	0.942845	2.77153	0.00557935	0.0493484	UP	7	0	0	6	61	16	4	69
BANF1	634.773	-0.378649	0.247464	-1.53012	0.125987	0.362742	NOT	757	391	588	652	1118	395	463	1013
BANK1	25.7589	-0.703699	0.535969	-1.31295	0.189201	0.45346	NOT	29	25	28	23	21	6	28	45
BANP	105.969	0.162107	0.332315	0.487811	0.625683	0.82053	NOT	63	118	90	54	161	150	93	161
BAP1	248.625	0.132358	0.245353	0.539459	0.58957	0.799855	NOT	210	131	292	171	475	302	149	494
BARX2	18.3974	-0.227908	0.586193	-0.388793	0.69743	0.862528	NOT	12	18	19	17	32	5	11	52
BASP1	167.246	-0.224133	0.3104	-0.722077	0.470247	0.72236	NOT	99	165	241	98	227	155	162	230
BATF	58.1547	0.72517	0.367276	1.97445	0.0483301	0.207287	NOT	50	43	31	19	111	76	54	146
BATF2	173.051	-0.629215	0.332452	-1.89265	0.0584044	0.232416	NOT	223	97	126	248	238	119	144	187
BATF3	61.3419	0.582189	0.462582	1.25856	0.208188	0.478365	NOT	13	64	59	25	143	65	72	97
BAX	173.653	-0.481237	0.241588	-1.99198	0.0463737	0.202578	NOT	137	175	233	129	246	168	110	236
BAZ1A	1121.67	-0.81254	0.211755	-3.83716	0.000124464	0.00265081	NOT	1198	1271	1207	1014	1056	856	830	1353
BAZ1B	60.2021	-0.18266	0.348029	-0.524842	0.599693	0.805713	NOT	68	56	40	45	89	45	42	134
BAZ2A	208.379	0.161604	0.271149	0.595998	0.551176	0.776703	NOT	159	155	253	95	398	234	141	425
BAZ2B	69.1422	0.168258	0.381512	0.441029	0.659192	0.840935	NOT	86	20	72	43	116	78	67	115
BBIP1	52.0794	0.193598	0.348038	0.556255	0.578036	0.792039	NOT	33	27	69	36	82	53	56	94
BBOX1	30.5066	1.05261	0.496036	2.12204	0.0338348	0.16676	NOT	31	13	16	6	80	43	23	82
BBS1	12.7401	0.342406	0.787647	0.43472	0.663765	0.843412	NOT	10	0	24	6	16	20	14	20
PHOSPHO1	88.5615	2.61002	0.44925	5.80972	6.2577e-09	6.90044e-07	UP	19	19	32	14	257	208	34	381
BBS4	92.6528	-0.463563	0.310406	-1.49341	0.135331	0.377441	NOT	62	83	90	119	140	104	55	104
BBX	86.721	0.125786	0.306115	0.41091	0.681139	0.853139	NOT	73	34	84	88	132	105	80	147
BCAM	83.1044	0.31611	0.414255	0.763081	0.445415	0.703566	NOT	73	30	39	102	115	146	76	116
BCAP29	52.3994	0.0946082	0.393602	0.240365	0.810047	0.918749	NOT	36	21	84	34	68	56	52	103
BCAP31	1118.54	1.14686	0.251521	4.55969	5.1229e-06	0.000198181	NOT	409	613	671	605	2591	2135	771	2845
BCAR1	557.233	0.378091	0.255608	1.47919	0.139091	0.38337	NOT	466	219	546	410	980	826	351	1249
BCAR3	114.144	0.793396	0.348893	2.27404	0.0229639	0.129209	NOT	48	90	51	81	268	195	69	255
BCAS1	72.0066	-0.719299	0.427626	-1.68208	0.092554	0.304507	NOT	76	80	67	69	92	19	78	82
BCAS2	107.375	-0.0908086	0.314516	-0.288724	0.772792	0.900827	NOT	138	70	88	70	163	90	114	158
BCAS3	26.6568	-0.718449	0.519084	-1.38407	0.166337	0.423798	NOT	15	29	54	15	49	22	11	28
BCAS4	20.712	-0.489621	0.60553	-0.808582	0.418756	0.681879	NOT	15	31	6	24	34	10	19	26
BCAT1	29.7708	-0.200587	0.578081	-0.346988	0.728601	0.877847	NOT	9	41	18	34	59	11	19	71
BCAT2	120.452	-0.497921	0.26676	-1.86655	0.0619641	0.241133	NOT	116	119	145	87	171	84	101	159
BCCIP	154.234	-0.375734	0.308395	-1.21835	0.22309	0.4959	NOT	166	101	227	97	244	86	131	254
BCDIN3D	25.4789	0.414296	0.531076	0.780107	0.435328	0.695994	NOT	17	18	8	27	37	37	34	29
BCHE	63.3805	0.33024	0.369794	0.893038	0.371837	0.640611	NOT	59	53	34	36	85	110	51	111
BCKDHA	129.854	0.133105	0.402537	0.330666	0.740897	0.883997	NOT	94	23	164	146	197	166	103	245
BCKDHB	30.6298	-0.152062	0.458058	-0.331972	0.739911	0.883624	NOT	33	27	32	15	68	16	26	47
BCKDK	100.243	-0.352635	0.263093	-1.34035	0.180133	0.441948	NOT	89	80	129	78	147	78	87	143
BCL10	58.0012	-0.0861449	0.399954	-0.215387	0.829465	0.926635	NOT	26	57	66	49	113	29	53	110
BCL11A	31.8554	0.191938	0.430067	0.446298	0.655382	0.838723	NOT	33	19	36	12	53	45	26	51
BCL2	34.9157	-0.0581902	0.393139	-0.148014	0.882332	0.950742	NOT	39	19	28	32	43	47	28	56
BCL2A1	32.1033	-0.37684	0.401456	-0.938684	0.347893	0.617633	NOT	27	28	37	29	68	24	19	41
BCL2L1	164.243	0.802746	0.237245	3.38362	0.000715376	0.0103694	NOT	84	101	102	108	369	200	138	439
VTN	12.0814	2.60597	0.875782	2.97559	0.00292425	0.0305974	UP	0	0	7	5	39	26	6	49
BCL2L12	35.0476	-0.432549	0.405324	-1.06717	0.285896	0.561659	NOT	42	27	34	30	60	34	27	30
BCL2L13	223.312	0.366319	0.239191	1.53149	0.125649	0.362052	NOT	149	101	214	194	463	280	159	461
BCL2L14	68.8301	-0.584307	0.428238	-1.36444	0.172428	0.432315	NOT	77	34	51	112	91	27	50	136
BCL2L15	1934.58	-0.24104	0.354938	-0.679104	0.497072	0.738287	NOT	2357	835	1540	2258	3545	760	1414	4349
BCL3	127.445	-0.295616	0.309897	-0.953917	0.340126	0.611815	NOT	123	65	169	120	218	70	99	239
BCL6	74.6183	0.15928	0.304203	0.523597	0.600559	0.80651	NOT	63	43	57	70	101	105	70	119
BCL6B	15.6093	-0.437316	0.768529	-0.569029	0.569336	0.786943	NOT	11	0	28	24	15	12	10	36
BCL7A	38.6367	-0.940523	0.526448	-1.78655	0.0740109	0.270441	NOT	21	47	89	17	60	21	12	60
BCL7C	177.376	0.545278	0.298239	1.82833	0.0675006	0.254771	NOT	85	105	198	100	339	306	111	368
BCL9	69.2763	-0.0433275	0.351215	-0.123365	0.901818	0.959085	NOT	42	65	94	34	92	74	66	115
BCL9L	109.067	-0.21327	0.311168	-0.685384	0.493102	0.735445	NOT	54	104	147	87	173	119	61	194
BCLAF1	194.356	-0.279924	0.324369	-0.862979	0.388149	0.655658	NOT	300	126	170	112	322	130	136	377
LPGAT1	311.674	2.60207	0.63512	4.09698	4.18581e-05	0.00110141	UP	25	115	72	72	702	1074	170	862
BCO2	56.5314	-0.203449	0.333385	-0.610251	0.541695	0.77065	NOT	61	44	42	51	64	66	50	83
BCOR	25.8935	-0.411984	0.606613	-0.679155	0.49704	0.738287	NOT	42	3	23	32	36	36	11	34
BCORL1	41.9586	1.06334	0.427492	2.4874	0.012868	0.0883758	NOT	18	20	33	20	77	105	30	77
P3H2	21.0654	2.59398	0.598388	4.33495	1.45792e-05	0.000459947	UP	7	5	7	1	69	20	33	75
BCS1L	86.24	-0.0772625	0.336961	-0.229292	0.818642	0.922027	NOT	41	73	113	69	108	82	94	134
BDH1	53.9384	0.187005	0.3966	0.47152	0.637269	0.828034	NOT	56	23	64	29	119	76	27	91
BDH2	273.863	0.401013	0.298503	1.34342	0.179137	0.440434	NOT	216	81	301	210	569	333	184	631
BDP1	78.393	0.0409863	0.288186	0.142222	0.886905	0.9528	NOT	77	42	84	57	111	78	65	170
BECN1	129.149	-0.0492987	0.293455	-0.167994	0.866588	0.943253	NOT	154	101	96	80	213	106	127	210
BEND3	16.1072	-0.577791	0.602153	-0.959542	0.337286	0.609149	NOT	16	4	29	18	16	18	7	29
BEND6	17.795	-0.572038	0.67152	-0.851856	0.394294	0.661286	NOT	7	30	16	15	28	3	18	26
BEND7	123.422	0.0116081	0.260408	0.0445767	0.964445	0.985237	NOT	80	101	134	94	197	169	84	196
BEST4	71.2747	-0.150245	0.473597	-0.317243	0.751059	0.888384	NOT	23	61	99	68	79	94	85	48
BET1	88.4661	-0.368641	0.290569	-1.26868	0.204554	0.47417	NOT	53	78	103	98	127	90	49	150
BET1L	150.325	0.479304	0.244847	1.95757	0.050281	0.212108	NOT	96	85	159	84	312	170	122	349
BEX3	26.1911	-0.447876	0.45468	-0.985036	0.324606	0.597136	NOT	26	16	45	16	31	22	23	37
BFAR	81.2466	-0.347006	0.378835	-0.915982	0.359676	0.6289	NOT	40	56	101	108	117	112	51	80
BGLAP	29.2832	-1.15526	0.646525	-1.78687	0.0739584	0.270379	NOT	25	53	7	41	25	37	12	13
BGN	101.263	-0.347927	0.287125	-1.21176	0.225605	0.497915	NOT	99	65	98	116	159	120	50	147
BHLHA15	31.4413	0.362856	0.66471	0.545886	0.585144	0.796231	NOT	31	28	6	23	96	8	13	104
BHLHB9	12.2085	-0.429342	0.702851	-0.610858	0.541294	0.77032	NOT	18	14	4	9	14	5	8	32
BHLHE40	106.816	-0.314444	0.313828	-1.00196	0.316362	0.590787	NOT	127	86	97	82	156	61	72	244
BICC1	18.1461	-0.225355	0.549512	-0.410101	0.681732	0.853449	NOT	29	11	14	11	20	17	11	44
BICD2	67.7576	-0.00213058	0.335468	-0.00635108	0.994933	0.997996	NOT	53	38	58	76	90	100	56	92
BICDL2	44.6126	0.351607	0.431039	0.815719	0.414661	0.678738	NOT	37	13	42	41	80	81	22	84
BICRA	31.7441	-0.105214	0.481813	-0.21837	0.827141	0.925591	NOT	19	9	45	40	62	34	24	40
BICRAL	39.7588	-0.0556584	0.539986	-0.103074	0.917904	0.965051	NOT	44	38	47	6	92	20	31	74
BID	92.3528	0.0693339	0.293284	0.236405	0.813118	0.920255	NOT	64	73	77	84	200	108	50	160
BIN1	172.225	-0.224015	0.228207	-0.981631	0.326282	0.599097	NOT	164	134	164	151	212	178	157	253
BIN2	54.1884	-0.261636	0.395354	-0.661778	0.508113	0.747776	NOT	52	63	52	27	102	43	24	112
BIN3	71.1442	0.0459913	0.324476	0.14174	0.887285	0.952947	NOT	59	48	68	59	102	88	34	179
BIRC3	570.391	0.695374	0.201404	3.45263	0.000555153	0.00849578	NOT	380	253	412	409	1183	605	665	1231
BIRC5	115.528	-1.05468	0.298203	-3.53678	0.000405042	0.00663763	NOT	179	94	135	112	142	54	53	169
BIRC6	112.906	-0.155656	0.27872	-0.558467	0.576526	0.791232	NOT	124	100	84	82	209	114	69	185
BIVM	53.4568	-0.50508	0.40827	-1.23712	0.216042	0.48711	NOT	67	18	57	69	57	41	48	78
BLCAP	192.441	0.731131	0.254542	2.87234	0.00407449	0.038927	NOT	89	98	189	113	381	298	149	463
BLM	20.1029	-0.511317	0.507235	-1.00805	0.313431	0.58832	NOT	20	17	23	18	31	19	18	13
BLMH	129.757	0.186395	0.248114	0.751247	0.452504	0.708585	NOT	121	84	116	83	239	175	92	223
BLNK	105.332	-0.498421	0.306993	-1.62356	0.104469	0.325632	NOT	130	74	125	84	160	53	84	171
BLOC1S1	181.553	0.448604	0.22291	2.01249	0.044168	0.196805	NOT	120	90	174	133	345	246	140	391
BLOC1S2	71.9568	-0.287875	0.316773	-0.908775	0.363469	0.631912	NOT	58	76	80	47	116	48	60	120
BLOC1S3	21.9167	-0.297785	0.577146	-0.515962	0.605881	0.81004	NOT	20	19	33	10	36	6	14	59
BLOC1S4	44.8952	0.303349	0.341383	0.888589	0.374224	0.642115	NOT	31	22	45	37	92	49	44	73
BLOC1S6	29.1783	0.0373888	0.567603	0.0658715	0.94748	0.979615	NOT	29	34	14	15	24	14	34	85
BLVRA	71.8168	-0.126954	0.456846	-0.277893	0.781094	0.905115	NOT	48	69	119	18	108	109	39	101
BLVRB	117.006	0.423784	0.29139	1.45435	0.145848	0.394649	NOT	74	75	111	75	264	97	83	318
BLZF1	63.7471	-0.341454	0.375153	-0.910173	0.362731	0.631243	NOT	54	71	49	57	83	31	65	113
BMF	62.8926	0.0852767	0.326477	0.261202	0.793936	0.912029	NOT	37	61	57	46	125	52	47	131
BMI1	73.796	-0.854339	0.421526	-2.02678	0.0426854	0.19319	NOT	59	106	99	47	98	28	69	67
BMP1	93.8547	0.720568	0.394784	1.82522	0.0679678	0.256051	NOT	70	40	103	29	157	203	62	182
BMP2	28.6563	-0.284028	0.607908	-0.467223	0.64034	0.829441	NOT	23	7	11	63	51	27	16	47
BMP2K	492.07	0.25436	0.244907	1.0386	0.298993	0.574717	NOT	294	471	407	295	805	674	446	803
BMP4	71.5582	-0.589694	0.317313	-1.8584	0.0631126	0.243753	NOT	95	67	67	54	116	61	43	81
BMP5	19.0901	-0.257948	0.549307	-0.469588	0.63865	0.828323	NOT	13	11	16	29	14	20	14	44
BMP7	31.7144	-0.73925	0.540553	-1.36758	0.171444	0.430742	NOT	9	45	32	43	43	12	19	59
BMPR1A	55.6271	-0.0678429	0.352839	-0.192277	0.847525	0.934749	NOT	51	37	47	53	89	35	64	89
BMPR2	20.2294	-0.886969	0.739052	-1.20014	0.230083	0.502763	NOT	50	1	28	11	25	18	13	15
BMS1	66.7774	-0.839104	0.339511	-2.47151	0.0134545	0.0910259	NOT	58	78	94	55	70	36	35	125
BMT2	27.6005	0.22929	0.537668	0.426452	0.669778	0.84675	NOT	20	35	18	8	38	23	39	45
BNC2	13.2134	0.418224	0.697446	0.59965	0.548739	0.775229	NOT	7	8	22	2	23	26	10	17
BNIP1	54.5988	-0.44986	0.332706	-1.35212	0.176335	0.436969	NOT	56	33	69	54	81	62	34	61
BNIP2	45.3482	-0.39488	0.369422	-1.06891	0.28511	0.560949	NOT	26	34	55	57	65	32	39	68
BNIP3	550.8	1.16902	0.222174	5.26173	1.42703e-07	9.84652e-06	NOT	260	260	315	287	1011	996	724	1032
BNIP3L	172.788	0.207312	0.245434	0.844677	0.398291	0.664292	NOT	146	145	146	91	327	197	150	295
BOD1	187.867	-0.146043	0.278523	-0.524348	0.600036	0.806083	NOT	133	108	172	245	309	142	150	360
BOD1L1	39.066	-0.400247	0.510875	-0.783454	0.433361	0.694299	NOT	66	34	39	8	52	28	31	67
BOK	101.73	-0.0418043	0.427034	-0.0978946	0.922016	0.96744	NOT	103	35	55	148	142	126	109	104
BOLA1	91.7825	0.0610208	0.284278	0.214652	0.830038	0.926836	NOT	96	55	65	81	143	118	64	170
BOLA2B	296.074	0.268667	0.21884	1.22769	0.219565	0.491322	NOT	195	170	230	297	568	347	228	592
BOLA3	102.567	-0.0950639	0.283416	-0.335422	0.737307	0.882211	NOT	56	89	104	101	163	97	95	154
BOP1	177.701	-0.761923	0.237349	-3.21014	0.0013267	0.016742	NOT	203	135	260	156	246	150	84	230
BORA	54.0668	-1.04903	0.461258	-2.27429	0.0229484	0.129183	NOT	72	32	76	66	66	9	39	77
BORCS5	47.9979	-0.346736	0.416745	-0.83201	0.405403	0.670689	NOT	45	17	90	35	73	42	33	78
BORCS6	63.4102	0.623388	0.367581	1.69592	0.0899006	0.300226	NOT	36	37	29	61	152	94	59	91
BORCS7	121.559	0.0448575	0.264637	0.169505	0.865399	0.943052	NOT	117	94	80	100	193	130	117	189
BORCS8	56.7967	0.134871	0.331506	0.406842	0.684124	0.854992	NOT	42	27	59	55	115	64	34	114
BPGM	30.8211	0.206213	0.409581	0.503473	0.614632	0.813988	NOT	16	26	28	25	59	38	17	68
BPHL	192.081	-0.243954	0.273433	-0.892188	0.372292	0.640892	NOT	212	106	272	119	277	189	130	344
LOC106507519	21.3584	2.59334	0.773953	3.35077	0.000805865	0.0113873	UP	0	1	9	11	91	22	12	99
BPNT1	265.081	-0.678267	0.232947	-2.91169	0.00359484	0.0356649	NOT	323	190	318	262	337	194	127	474
BPTF	41.2623	-0.179882	0.466643	-0.385481	0.699881	0.863711	NOT	43	35	30	36	43	18	31	129
BRAF	66.4574	-0.418357	0.330084	-1.26743	0.205003	0.474724	NOT	56	68	75	51	66	76	57	80
BRAP	65.4379	0.557798	0.407899	1.36749	0.171472	0.430742	NOT	31	71	34	33	136	59	87	112
BRAT1	98.0989	-0.4013	0.296912	-1.35158	0.17651	0.436969	NOT	62	93	86	125	145	95	68	132
COL17A1	396.007	2.59006	0.406317	6.37447	1.83593e-10	2.74204e-08	UP	34	121	153	68	1010	1169	264	1184
BRCA2	17.3052	-0.031057	0.609058	-0.0509919	0.959332	0.983249	NOT	17	4	26	13	28	15	23	16
BRCC3	56.9617	-0.084554	0.368042	-0.22974	0.818294	0.921811	NOT	65	29	53	49	59	85	36	107
BRD1	91.9	-0.218981	0.285069	-0.768171	0.442386	0.701291	NOT	55	74	97	102	150	94	71	125
BRD2	480.983	-0.424671	0.20504	-2.07116	0.0383439	0.181535	NOT	493	286	642	443	639	430	321	791
BRD4	302.372	-0.130013	0.18706	-0.695034	0.487034	0.732787	NOT	236	235	333	250	537	294	212	502
BRD7	154.392	-0.525583	0.235117	-2.23541	0.0253906	0.136984	NOT	109	157	188	150	200	134	98	239
BRD8	102.917	-0.125818	0.274287	-0.458707	0.646444	0.833777	NOT	63	78	115	102	173	118	79	138
BRD9	170.314	0.191485	0.260334	0.735538	0.462012	0.716802	NOT	98	131	163	136	294	256	106	305
BRF1	378.974	0.0818514	0.242713	0.337235	0.73594	0.881303	NOT	217	368	355	270	643	496	258	663
BRF2	19.5142	-0.00389259	0.57807	-0.00673378	0.994627	0.997996	NOT	25	10	27	5	34	18	10	49
BRI3	328.032	0.291956	0.17611	1.65781	0.0973563	0.313326	NOT	246	220	262	249	627	372	263	674
BRI3BP	224.695	0.572775	0.206473	2.77409	0.0055356	0.0489982	NOT	151	118	178	156	442	332	175	483
BRIP1	13.7858	-0.919721	0.66358	-1.386	0.165747	0.422844	NOT	18	5	14	23	17	6	14	9
BRIX1	91.4641	-0.38841	0.282149	-1.37661	0.168632	0.427614	NOT	92	69	97	86	138	94	73	94
BRK1	356.12	-0.069323	0.195337	-0.35489	0.722672	0.875274	NOT	291	303	312	295	649	315	292	584
BRMS1	128.459	0.177211	0.242509	0.73074	0.464938	0.718779	NOT	107	95	97	98	258	122	118	220
BRMS1L	22.4119	-0.115463	0.535247	-0.215719	0.829207	0.926567	NOT	23	27	9	15	27	33	18	28
BROX	121.589	-0.293112	0.278396	-1.05286	0.292406	0.566426	NOT	149	63	121	116	188	121	71	211
BRPF1	75.2649	-0.412951	0.429553	-0.961351	0.336376	0.60854	NOT	70	17	118	92	97	91	38	117
BRPF3	61.8981	-0.269358	0.35221	-0.764764	0.444412	0.703087	NOT	63	36	43	82	101	55	35	118
BRWD1	62.5638	-0.233687	0.359485	-0.65006	0.515653	0.752901	NOT	31	55	101	42	96	60	45	104
BRWD3	28.4512	-0.337449	0.513382	-0.657306	0.510984	0.749845	NOT	44	10	24	29	45	18	13	70
BSCL2	118.606	-0.0851476	0.238463	-0.357068	0.721041	0.875141	NOT	92	94	126	95	216	127	74	204
BSDC1	30.5	0.303857	0.433249	0.701344	0.483088	0.73067	NOT	32	21	26	12	57	35	19	76
BSG	469.539	0.630966	0.230249	2.74037	0.00613707	0.052434	NOT	268	283	382	294	1130	725	305	930
BSPRY	119.256	-0.274271	0.294042	-0.932761	0.350943	0.621272	NOT	119	63	172	90	163	139	92	154
TMEM117	13.3076	2.58188	0.935507	2.75987	0.00578238	0.0505755	UP	0	5	0	7	19	53	9	32
BST2	83.5367	-0.725424	0.509772	-1.42304	0.154725	0.40942	NOT	54	76	25	180	130	38	43	146
BTAF1	87.7959	0.391925	0.292594	1.33949	0.180413	0.441948	NOT	77	51	84	42	138	127	81	166
BTBD1	80.465	-0.416951	0.263966	-1.57956	0.114207	0.342709	NOT	79	66	82	77	101	70	67	115
BTBD10	35.8582	-0.873508	0.485626	-1.79873	0.0720619	0.265789	NOT	58	43	35	15	43	19	31	33
BTBD19	33.27	-0.103062	0.466252	-0.221043	0.825059	0.924665	NOT	25	14	45	33	27	53	28	49
BTBD2	424.323	0.440055	0.188057	2.34001	0.019283	0.115626	NOT	318	247	387	253	865	556	332	860
BTBD3	256.55	0.220841	0.195216	1.13127	0.257943	0.533193	NOT	200	148	232	211	403	324	206	524
TMEM104	77.7713	2.58146	0.334228	7.72363	1.13064e-14	4.94088e-12	UP	24	18	12	19	245	150	88	232
BTBD7	123.97	0.158304	0.26822	0.590201	0.555056	0.779655	NOT	85	103	126	75	182	176	86	245
BTBD9	32.0471	-0.686837	0.449145	-1.52921	0.126212	0.363037	NOT	34	29	40	29	55	38	9	30
BTC	15.6302	-1.137	0.741631	-1.5331	0.125251	0.361639	NOT	24	26	5	12	13	8	17	5
BTD	101.371	0.677278	0.302646	2.23786	0.0252303	0.136442	NOT	45	60	112	47	215	140	87	225
BTF3	901.748	-0.0132107	0.177097	-0.0745959	0.940536	0.975852	NOT	893	669	813	625	1388	1033	703	1573
BTF3L4	74.9524	0.0861745	0.290106	0.297045	0.766432	0.897403	NOT	60	42	89	54	129	86	69	112
BTG1	288.1	-0.15219	0.2252	-0.675799	0.499168	0.739971	NOT	254	222	300	232	425	203	277	522
BTG2	96.1216	0.271306	0.346065	0.783974	0.433056	0.694245	NOT	115	69	43	56	165	97	91	202
BTG3	67.5717	-0.481951	0.346779	-1.38979	0.164592	0.4214	NOT	63	52	53	90	76	48	67	90
BTK	25.0384	0.771367	0.554948	1.38998	0.164535	0.4214	NOT	5	8	17	32	46	43	20	58
BTNL2	321.303	-0.407194	0.315172	-1.29197	0.196366	0.4632	NOT	260	288	407	266	334	500	214	284
BTRC	69.0031	0.736259	0.359351	2.04885	0.0404763	0.18736	NOT	52	22	67	36	174	80	45	190
RASAL3	43.6326	2.57386	0.434426	5.92473	3.12805e-09	3.61841e-07	UP	8	9	13	12	153	45	52	174
BUB1B	26.7726	-0.778132	0.467615	-1.66404	0.0961036	0.311186	NOT	31	18	48	18	25	15	23	38
BUB3	137.842	-0.659338	0.32179	-2.04897	0.0404652	0.18736	NOT	187	58	137	184	170	116	83	196
BUD13	81.8569	-0.514817	0.327211	-1.57335	0.115638	0.345185	NOT	66	100	84	65	112	44	61	147
BUD23	126.414	0.119523	0.261997	0.456201	0.648245	0.834968	NOT	99	86	93	122	185	166	83	271
BUD31	86.4733	0.124206	0.330533	0.375775	0.707084	0.867785	NOT	49	44	94	91	112	89	102	145
BYSL	79.9735	-0.0993192	0.309614	-0.320784	0.748374	0.887266	NOT	72	40	76	89	148	60	68	136
BZW1	589.91	-0.260165	0.208117	-1.25009	0.211267	0.481967	NOT	593	459	625	462	919	399	472	1098
BZW2	149.602	-0.282886	0.327385	-0.864075	0.387547	0.655297	NOT	193	112	127	111	261	71	111	309
LOC100621559	79.3867	2.56986	0.48304	5.32019	1.0366e-07	7.47995e-06	UP	14	21	40	3	268	142	63	298
C10H1orf115	2466.31	-0.211493	0.212278	-0.996302	0.319103	0.593068	NOT	2578	2154	1654	2244	3890	2217	1734	4444
ANKH	254.977	2.53682	0.368833	6.87797	6.07114e-12	1.33915e-09	UP	56	64	41	83	894	278	196	1226
C10H9orf3	58.679	-0.0382069	0.335756	-0.113794	0.909401	0.961927	NOT	51	54	47	43	66	60	44	141
C10H9orf64	38.3453	-0.248902	0.45936	-0.541845	0.587925	0.798542	NOT	64	12	34	30	54	31	30	72
C10H9orf72	42.4748	0.195671	0.419643	0.466279	0.641016	0.829814	NOT	46	19	21	44	63	40	50	76
C12H17orf100	34.7534	-0.198345	0.586163	-0.338378	0.735079	0.880706	NOT	10	58	38	13	39	43	38	31
C12H17orf49	28.8396	-0.23545	0.440836	-0.534099	0.593273	0.801672	NOT	18	22	38	27	43	15	24	63
C12H17orf53	12.929	-0.342329	0.731881	-0.467739	0.639971	0.829145	NOT	7	12	5	22	13	6	20	13
C12H17orf62	357.324	0.781988	0.314757	2.48442	0.0129763	0.088825	NOT	98	237	308	232	773	613	238	814
C12H17orf75	22.2393	-0.514944	0.493656	-1.04312	0.296891	0.572015	NOT	35	11	23	19	33	13	14	41
C12H17orf78	31.5281	0.786153	0.65332	1.20332	0.228853	0.501591	NOT	2	13	46	20	71	46	10	108
C12H17orf80	81.6577	-0.166435	0.358706	-0.463987	0.642657	0.831068	NOT	51	72	127	42	102	110	50	141
C13H21orf2	66.9519	0.328973	0.362084	0.908553	0.363586	0.631912	NOT	47	29	81	45	98	123	50	107
C13H21orf33	672.832	0.603631	0.166247	3.63093	0.000282406	0.0049733	NOT	425	345	570	449	1448	833	595	1473
C13H21orf59	59.4289	-0.217093	0.375193	-0.578616	0.562848	0.78379	NOT	28	37	74	76	83	43	54	109
C13H21orf91	51.3478	-0.262733	0.36188	-0.726024	0.467824	0.720232	NOT	45	52	39	46	74	32	53	80
EFNA1	742.039	2.53463	0.368481	6.8786	6.04423e-12	1.33915e-09	UP	104	169	338	132	1998	2149	439	2250
C13H3orf38	201.674	-0.228904	0.221565	-1.03312	0.301547	0.577276	NOT	209	172	160	173	307	177	162	328
C13H3orf52	61.8825	0.425058	0.353259	1.20325	0.228881	0.501591	NOT	31	23	56	68	110	79	57	126
C13H3orf58	34.9519	0.658979	0.580189	1.1358	0.25604	0.530934	NOT	40	21	6	20	48	89	23	51
C13H3orf70	49.697	-0.806872	0.410644	-1.96489	0.0494267	0.209779	NOT	54	27	106	32	51	36	33	69
C14H10orf10	49.3057	0.973381	0.391537	2.48605	0.0129171	0.0885725	NOT	31	22	45	15	113	75	32	145
C14H10orf128	12.6085	0.253203	0.803473	0.315136	0.752658	0.888792	NOT	3	21	9	3	22	8	22	11
C14H10orf76	61.893	0.503577	0.374074	1.34619	0.17824	0.438959	NOT	40	59	43	25	116	92	37	152
C14H12orf43	81.1111	0.277822	0.332861	0.834649	0.403915	0.669166	NOT	71	27	74	76	164	102	51	169
C14H12orf49	130	0.623502	0.346131	1.80135	0.0716479	0.26509	NOT	129	72	96	44	316	145	80	356
C14H12orf65	29.6972	-0.386644	0.570538	-0.677683	0.497973	0.739078	NOT	46	21	16	27	39	6	29	66
C14H1orf131	50.7312	-0.638131	0.313451	-2.03583	0.0417678	0.190645	NOT	49	43	59	54	72	37	37	60
C14H1orf198	171.061	-0.664888	0.229542	-2.89658	0.0037725	0.036878	NOT	179	158	223	140	225	109	109	270
C14H22orf39	93.4568	0.106645	0.378846	0.281499	0.778328	0.903692	NOT	74	35	101	96	164	123	34	229
C15H2orf72	33.2372	0.431184	0.42528	1.01388	0.310639	0.58555	NOT	24	25	26	19	87	24	23	84
C15H2orf76	22.9788	0.70418	0.531627	1.32458	0.185312	0.448972	NOT	18	5	16	20	44	15	26	72
C15H2orf88	13.7424	0.119901	0.785815	0.152582	0.878728	0.94934	NOT	13	10	16	5	21	36	7	3
TMEM127	195.676	2.52793	0.307507	8.22073	2.02268e-16	1.25609e-13	UP	51	31	68	45	442	544	180	579
C16H5orf42	15.6141	0.540219	0.671413	0.8046	0.421051	0.68373	NOT	5	9	27	3	23	18	23	26
C16H5orf49	16.32	-0.553829	0.644971	-0.858687	0.390513	0.657898	NOT	6	10	13	35	12	19	11	25
C16H5orf51	158.573	-0.0654258	0.244688	-0.267385	0.789173	0.90941	NOT	134	126	117	156	259	137	114	335
C17H20orf194	29.7208	-0.778347	0.589118	-1.32121	0.186432	0.450485	NOT	11	58	29	21	23	39	20	21
C17H20orf24	65.7682	-0.411783	0.382901	-1.07543	0.282182	0.558635	NOT	45	95	39	60	83	62	50	95
C17H20orf27	100.853	-0.025969	0.241732	-0.107429	0.914449	0.963811	NOT	82	76	96	84	158	92	79	208
C17H8orf4	37.3359	-0.348272	0.461038	-0.755409	0.450004	0.706721	NOT	54	25	45	16	36	25	38	69
C18H7orf25	38.805	-0.149526	0.434711	-0.343966	0.730872	0.878969	NOT	33	38	22	39	72	19	39	64
C18H7orf49	31.639	0.432995	0.465544	0.930084	0.352327	0.622322	NOT	11	23	27	28	47	64	22	51
C1D	58.4941	0.679833	0.362026	1.87786	0.0604005	0.237793	NOT	40	29	41	39	104	44	88	130
C1GALT1	87.8688	0.909877	0.286323	3.1778	0.00148398	0.0183154	NOT	44	52	65	42	236	96	91	194
C1GALT1C1	30.4206	-0.226133	0.479713	-0.471394	0.63736	0.828034	NOT	18	44	26	18	44	36	13	61
C1H14orf166	285.883	-0.105083	0.218022	-0.481981	0.629819	0.823954	NOT	253	249	261	212	433	274	277	411
C1H14orf28	15.2716	0.437548	0.608466	0.719101	0.472079	0.723611	NOT	7	16	12	7	36	13	21	17
C1H15orf41	27.4679	-0.180169	0.571725	-0.315133	0.752661	0.888792	NOT	32	9	18	38	45	8	31	52
C1H15orf48	508.788	0.0250701	0.232752	0.107712	0.914224	0.963811	NOT	446	383	508	342	1002	411	314	1172
C1H15orf52	40.5876	-0.684715	0.408203	-1.67739	0.0934666	0.306082	NOT	69	28	31	37	61	31	25	47
C1H15orf57	73.5599	-0.379397	0.311565	-1.21772	0.223332	0.496091	NOT	56	57	93	73	142	72	41	87
C1H15orf62	22.2516	-0.254312	0.564207	-0.450742	0.652176	0.836871	NOT	11	15	46	12	39	10	20	41
C1H18orf25	57.5551	-0.403797	0.381821	-1.05756	0.290258	0.565102	NOT	27	58	49	80	73	46	48	89
C1H18orf32	116.175	0.246458	0.314402	0.783895	0.433102	0.694245	NOT	53	84	78	134	215	138	84	243
C1H18orf54	12.2425	0.598055	0.683427	0.875082	0.381529	0.649403	NOT	15	5	7	5	21	8	22	20
C1H6orf120	84.2985	0.250942	0.310102	0.809226	0.418385	0.681423	NOT	50	68	94	45	139	126	61	153
C1H6orf203	107.821	-0.675498	0.291707	-2.31567	0.0205761	0.120545	NOT	105	117	119	96	141	52	75	182
C1H9orf40	81.3225	0.451016	0.327406	1.37754	0.168345	0.427069	NOT	64	48	85	34	146	69	94	185
C1H9orf50	14.547	0.881406	0.879327	1.00236	0.316168	0.590787	NOT	0	1	11	23	29	28	8	38
C1H9orf78	120.207	-0.165679	0.273563	-0.605634	0.544758	0.772973	NOT	90	113	97	117	196	96	77	258
C1H9orf85	12.4735	-0.646061	0.779398	-0.828923	0.407148	0.672162	NOT	20	0	14	18	13	13	6	20
C1QA	309.839	-0.1098	0.211923	-0.518111	0.604381	0.809046	NOT	283	269	265	242	506	319	184	622
C1QB	372.263	0.0296554	0.281158	0.105476	0.915998	0.964208	NOT	295	432	273	190	628	376	293	706
C1QBP	175.751	-0.160425	0.231753	-0.692221	0.488798	0.733086	NOT	182	119	172	145	302	132	140	318
C1QC	343.329	-0.381903	0.240907	-1.58527	0.112904	0.340116	NOT	326	395	292	251	564	303	220	505
C1QTNF1	47.9702	0.531441	0.417963	1.2715	0.20355	0.472773	NOT	19	23	35	53	78	46	70	86
C1QTNF2	20.7631	0.140875	0.595397	0.236607	0.812962	0.920211	NOT	10	17	15	22	32	19	34	13
C1QTNF3	37.1598	-0.16684	0.459522	-0.363074	0.71655	0.872897	NOT	52	29	32	16	40	33	45	51
C1QTNF4	20.0411	-0.516087	0.747788	-0.690152	0.490099	0.733749	NOT	3	13	58	10	14	34	7	30
C1QTNF5	23.4273	-0.50258	0.487115	-1.03175	0.30219	0.577711	NOT	11	26	30	24	26	14	18	46
C1QTNF7	15.3063	-0.525053	0.704006	-0.745808	0.455784	0.710972	NOT	6	33	10	7	13	18	13	16
C1R	367.276	-0.159752	0.218489	-0.73117	0.464675	0.718779	NOT	276	315	344	344	546	481	223	568
C1RL	12.7298	1.06763	0.605563	1.76304	0.0778939	0.278293	NOT	7	4	10	7	39	18	8	32
C1S	175.735	-0.975134	0.306259	-3.18402	0.00145244	0.0180204	NOT	197	200	115	242	238	96	96	207
C2	205.109	-0.0816284	0.384624	-0.212229	0.831928	0.927254	NOT	192	111	162	237	492	113	76	524
C2CD2	27.1504	0.100149	0.466267	0.214788	0.829932	0.926836	NOT	21	26	21	18	38	43	11	61
LOC106506744	81.2601	2.51799	0.504343	4.99262	5.95662e-07	3.22395e-05	UP	24	33	11	9	186	259	45	246
C2CD3	91.2134	-0.0326819	0.310136	-0.105379	0.916075	0.964208	NOT	79	60	104	66	108	145	65	137
C2CD4B	21.8631	1.37536	0.721068	1.9074	0.0564694	0.227255	NOT	9	0	10	22	43	19	48	39
C2CD5	166.649	-0.517512	0.203503	-2.54302	0.0109899	0.0790673	NOT	157	139	180	175	230	152	107	231
LOC102158332	218.766	2.51038	0.780185	3.21767	0.00129236	0.0163964	UP	66	70	41	34	1090	68	109	1114
C2H11orf49	14.4242	-0.226072	0.789768	-0.286251	0.774686	0.901475	NOT	2	12	33	7	11	32	6	16
C2H11orf58	156.046	-0.311468	0.222015	-1.40291	0.160643	0.41634	NOT	157	121	164	132	208	125	130	266
C2H11orf68	82.2032	0.296984	0.329877	0.900286	0.367968	0.6367	NOT	55	51	81	60	115	148	46	169
C2H11orf84	40.194	-0.0977459	0.392164	-0.249248	0.803169	0.916519	NOT	54	22	27	34	58	40	37	64
KIAA1161	279.441	2.50069	0.401564	6.22738	4.743e-10	6.43249e-08	UP	26	76	132	50	659	852	249	675
C2H11orf95	150.459	0.811548	0.219187	3.70254	0.00021345	0.00395368	NOT	79	93	102	87	307	193	152	366
C2H11orf96	299.948	-0.571353	0.273554	-2.08863	0.0367408	0.176861	NOT	371	313	201	277	371	242	244	362
C2H11orf98	75.3985	-0.476666	0.385869	-1.23531	0.216716	0.488171	NOT	75	61	89	68	122	22	59	147
C2H19orf25	250.235	1.17347	0.260009	4.51318	6.38619e-06	0.000236209	NOT	96	108	174	137	517	509	198	609
C2H19orf43	384.597	-0.279323	0.179179	-1.5589	0.119019	0.350289	NOT	341	320	446	299	591	380	248	637
C2H19orf53	215.03	0.333069	0.243394	1.36844	0.171175	0.43047	NOT	124	125	224	168	471	240	142	473
C2H19orf60	61.8624	-0.437248	0.42658	-1.02501	0.30536	0.580468	NOT	45	36	58	98	112	23	53	95
C2H19orf66	163.812	-0.581164	0.236055	-2.46198	0.0138171	0.0928408	NOT	174	164	142	162	210	149	114	201
C2H19orf70	120.967	0.230583	0.30028	0.767893	0.442551	0.701342	NOT	95	88	90	94	260	74	113	269
C2H1orf35	388.007	-0.490661	0.226749	-2.1639	0.0304723	0.154887	NOT	311	407	434	344	531	429	190	572
C2H5orf15	37.7332	0.815164	0.428893	1.90062	0.0573516	0.229309	NOT	8	22	38	24	79	47	43	82
C2H5orf24	126.754	-0.353425	0.264136	-1.33805	0.180882	0.442424	NOT	124	110	157	84	177	90	92	243
C2H5orf30	98.9899	0.199171	0.308056	0.646542	0.517928	0.754542	NOT	119	50	70	67	184	91	90	199
C2H5orf63	30.1482	0.215822	0.665968	0.324073	0.745882	0.886628	NOT	27	0	33	36	49	28	38	46
C3	7787.14	0.304247	0.347579	0.875332	0.381393	0.649359	NOT	6756	3825	5177	7343	20257	3854	4525	22771
C3AR1	24.7042	-0.568917	0.603504	-0.942689	0.34584	0.615656	NOT	16	32	16	30	23	30	26	9
C3H16orf52	20.2829	1.03804	0.762383	1.36157	0.173334	0.433325	NOT	6	0	20	20	25	18	45	37
SLC36A1	68.4453	2.4983	0.357637	6.98559	2.83656e-12	7.60651e-10	UP	17	18	10	22	148	140	97	214
C3H16orf58	14.7862	-0.20992	0.589457	-0.356125	0.721747	0.875274	NOT	12	17	13	10	22	22	4	27
C3H16orf59	44.3791	-0.674459	0.512271	-1.3166	0.187971	0.451981	NOT	41	8	59	78	54	32	38	47
C3H16orf62	78.0123	0.249086	0.2971	0.838392	0.401811	0.667088	NOT	51	51	93	45	111	99	71	159
C3H16orf72	114.137	-0.301263	0.301577	-0.998959	0.317814	0.591746	NOT	92	131	107	82	213	74	80	191
C3H16orf91	72.3479	0.0823666	0.365032	0.225642	0.82148	0.922802	NOT	30	57	53	91	146	74	48	138
C3H2orf42	17.7253	-0.63618	0.563348	-1.12928	0.258778	0.534172	NOT	25	17	23	7	34	10	11	20
C3H2orf49	40.4289	-0.0382477	0.379003	-0.100917	0.919617	0.966039	NOT	32	32	48	25	63	26	39	85
C3H2orf68	163.278	-0.145121	0.257913	-0.562674	0.573657	0.789292	NOT	129	120	226	105	293	145	107	302
C3H7orf26	123.457	0.56955	0.246697	2.3087	0.0209602	0.122249	NOT	72	60	123	80	220	160	128	258
C3H7orf43	87.3093	0.429469	0.382981	1.12138	0.262125	0.538161	NOT	73	17	73	89	147	108	90	172
C3H7orf50	64.9094	0.053147	0.332894	0.159651	0.873156	0.947232	NOT	62	36	82	36	86	81	47	137
C4A	662.013	-0.1788	0.343675	-0.520258	0.602884	0.80832	NOT	751	363	345	849	1379	419	368	1397
C4BPA	1044.35	-0.288405	0.275968	-1.04507	0.295991	0.570561	NOT	1043	1045	631	998	1577	1117	471	2054
C4BPB	108.791	0.779707	0.356149	2.18927	0.0285773	0.147758	NOT	73	34	60	100	267	81	121	282
C4H1orf226	20.2852	0.898128	0.555092	1.61798	0.105667	0.328177	NOT	21	11	6	8	43	17	27	52
C4H1orf43	91.5443	0.480449	0.42316	1.13539	0.256214	0.531201	NOT	54	19	106	85	194	127	42	242
C4H1orf52	37.7855	-0.453212	0.393417	-1.15199	0.249326	0.522336	NOT	49	25	33	37	49	27	37	47
C4H8orf33	137.019	-0.544012	0.267464	-2.03397	0.0419548	0.191425	NOT	113	141	183	105	220	122	64	204
C4H8orf37	28.1952	-0.722406	0.427068	-1.69155	0.090732	0.301503	NOT	19	24	44	31	36	16	22	37
C4H8orf59	68.8825	-0.0919226	0.31466	-0.292133	0.770185	0.899759	NOT	60	54	60	61	143	45	57	115
C4H8orf76	20.4219	-0.537005	0.786912	-0.682421	0.494973	0.737275	NOT	23	11	47	3	5	15	32	18
C4H8orf82	39.0472	0.800103	0.371775	2.15212	0.0313881	0.157796	NOT	30	16	28	21	90	53	45	66
C5	435.393	-0.679443	0.267275	-2.54212	0.0110183	0.079175	NOT	496	297	379	602	577	238	285	719
C5H12orf10	97.6701	-0.219262	0.350606	-0.62538	0.531722	0.76435	NOT	81	31	149	101	149	95	73	159
C5H12orf29	28.2114	-0.0264083	0.479621	-0.0550607	0.95609	0.982515	NOT	16	22	43	16	71	29	14	41
C5H12orf4	57.3821	-0.437672	0.331782	-1.31915	0.187117	0.450938	NOT	71	37	63	49	56	59	46	86
C5H12orf45	68.5212	-0.232983	0.331569	-0.702667	0.482263	0.730176	NOT	53	56	50	83	110	69	60	79
C5H12orf57	186.433	-0.0099381	0.229	-0.0433978	0.965384	0.985659	NOT	166	142	147	161	322	150	169	342
C5H12orf73	71.0321	0.0601555	0.322327	0.186629	0.851952	0.937208	NOT	67	47	69	50	159	57	41	154
C5H12orf75	44.2205	-0.524423	0.430122	-1.21924	0.222752	0.495783	NOT	55	43	37	35	32	26	48	74
P2RY2	137.318	2.48837	0.783917	3.17428	0.00150211	0.0184811	UP	14	50	65	10	286	507	55	374
C6H16orf70	12.0474	-0.29418	0.832881	-0.353208	0.723933	0.875662	NOT	11	15	1	15	26	2	7	29
C6H18orf21	67.6769	-0.384056	0.316376	-1.21392	0.224777	0.497122	NOT	46	79	67	59	94	53	45	125
C6H18orf8	49.6618	-0.526665	0.333993	-1.57687	0.114825	0.343994	NOT	42	40	61	53	63	58	23	72
C6H19orf12	205.979	1.06539	0.430007	2.47762	0.0132263	0.0898944	NOT	31	137	211	70	399	448	174	408
C6H19orf33	133.206	0.348322	0.350764	0.993036	0.320692	0.594819	NOT	74	80	156	87	293	70	114	372
C6H19orf47	43.0055	-0.395455	0.407823	-0.969673	0.33221	0.604339	NOT	34	29	81	24	70	33	32	62
C6H19orf54	118.348	0.0667743	0.261087	0.255755	0.79814	0.913985	NOT	88	59	127	116	222	126	84	221
C6H19orf81	18.2986	0.136047	0.578099	0.235335	0.813948	0.920431	NOT	18	12	23	6	42	8	18	37
C6H1orf109	79.1974	-0.258315	0.347439	-0.743484	0.457189	0.712316	NOT	76	42	89	83	132	39	77	133
C6H1orf122	27.786	0.352933	0.518997	0.680028	0.496486	0.738001	NOT	6	17	22	36	38	31	24	75
C6H1orf123	181.06	-0.275999	0.222449	-1.24073	0.214705	0.485679	NOT	165	153	175	162	282	135	156	284
C6H1orf168	16.566	-0.0159207	0.545342	-0.029194	0.97671	0.990151	NOT	15	15	16	9	31	8	17	32
C6H1orf174	39.5648	0.755619	0.364374	2.07374	0.0381032	0.181209	NOT	23	15	32	29	91	60	35	76
VSIR	402.752	2.48692	0.306093	8.12471	4.48443e-16	2.64559e-13	UP	53	89	176	95	990	1029	485	974
C6H1orf50	145.166	0.310088	0.248559	1.24754	0.212198	0.483039	NOT	118	66	134	118	304	180	109	267
C7	118.677	-0.221668	0.39061	-0.567493	0.57038	0.787518	NOT	98	170	97	46	222	87	71	232
C7H14orf1	154.322	0.336874	0.265059	1.27094	0.203751	0.472867	NOT	118	71	167	106	322	218	114	255
C7H14orf119	70.4285	-0.502531	0.308613	-1.62835	0.10345	0.323682	NOT	71	59	96	50	77	78	51	88
C7H14orf132	29.6366	0.256527	0.456121	0.56241	0.573837	0.789344	NOT	19	32	19	17	56	22	36	51
C7H14orf93	24.051	-0.458769	0.507644	-0.903722	0.366143	0.635105	NOT	26	8	36	25	36	14	24	29
C7H15orf39	96.266	0.862529	0.304309	2.83438	0.00459145	0.0424566	NOT	63	26	81	62	225	111	103	224
C7H15orf40	74.154	0.0830998	0.285778	0.290784	0.771216	0.900147	NOT	49	57	59	72	122	69	70	138
C7H6orf106	1271.08	0.748593	0.180274	4.15253	3.28816e-05	0.000917187	NOT	746	687	888	828	2821	1930	973	2858
C7H6orf125	159.97	0.0307904	0.272643	0.112933	0.910083	0.962193	NOT	95	122	214	102	257	159	156	257
C7H6orf132	193.785	0.544239	0.324421	1.67757	0.0934309	0.30605	NOT	200	87	178	67	365	284	135	462
C7H6orf136	68.7861	-0.12179	0.355501	-0.342587	0.73191	0.879409	NOT	31	52	65	89	89	81	59	105
C7H6orf222	67.1336	0.828508	0.454094	1.82453	0.0680722	0.256199	NOT	52	34	15	56	178	53	48	221
C7H6orf223	16.1486	0.422728	0.618445	0.683534	0.494269	0.736349	NOT	14	6	5	20	31	25	17	18
C7H6orf226	47.6494	-0.360454	0.351678	-1.02495	0.305384	0.580468	NOT	57	28	59	36	71	37	42	65
C7H6orf47	41.9509	0.0353551	0.465784	0.0759046	0.939495	0.975629	NOT	29	59	24	20	64	58	21	87
C7H6orf62	170.424	-0.344055	0.222019	-1.54966	0.121222	0.353859	NOT	189	142	170	131	255	150	108	297
C7H6orf89	155.87	0.464625	0.263965	1.76017	0.0783783	0.27956	NOT	87	129	137	80	301	200	116	363
C8G	44.2947	1.96629	1.12915	1.74139	0.0816147	0.285548	NOT	0	16	13	30	186	30	13	222
C8H4orf19	55.9439	0.346534	0.424247	0.81682	0.414031	0.678695	NOT	44	15	41	66	137	62	30	125
C8H4orf32	54.5505	-0.785843	0.355369	-2.21134	0.027012	0.142666	NOT	43	52	63	70	65	26	46	69
C8H4orf46	15.1819	0.357379	0.656408	0.544447	0.586134	0.797302	NOT	4	5	15	21	32	8	19	31
C8H4orf48	367.013	0.787819	0.414455	1.90086	0.057321	0.229309	NOT	67	263	420	159	752	707	202	853
C9	531.12	0.288274	0.263093	1.09571	0.273206	0.549719	NOT	415	366	428	374	1093	341	429	1441
C9H11orf1	30.1859	-0.222767	0.603196	-0.369311	0.711896	0.87007	NOT	10	18	77	10	37	38	27	35
LAG3	16.2079	2.46716	0.688105	3.58544	0.000336513	0.00571297	UP	4	4	9	0	58	26	13	60
C9H11orf54	141.921	0.387989	0.274094	1.41553	0.156912	0.412563	NOT	116	75	78	136	248	172	116	327
C9H11orf57	87.2798	0.0347592	0.3136	0.110839	0.911744	0.962664	NOT	80	48	94	69	175	60	59	205
C9H1orf116	276.351	0.578512	0.374827	1.54341	0.122732	0.356502	NOT	179	140	288	144	764	108	270	742
C9H1orf21	171.462	-0.717257	0.22921	-3.12926	0.00175248	0.0206775	NOT	167	142	200	199	162	148	121	231
C9H1orf27	77.7424	-0.229239	0.358289	-0.639816	0.522292	0.75862	NOT	65	45	112	62	92	89	83	77
C9H1orf74	22.3905	0.199971	0.51931	0.385071	0.700185	0.863711	NOT	11	10	29	21	37	42	13	31
CA11	32.7904	0.199829	0.506149	0.394802	0.692989	0.859064	NOT	20	38	18	21	44	36	49	32
GDPD2	22.5253	2.46365	0.817204	3.01474	0.00257203	0.0279185	UP	0	15	7	0	81	38	17	81
CLDN4	1159.93	2.46167	0.356257	6.90982	4.85285e-12	1.19289e-09	UP	103	405	404	261	3421	2677	982	3567
CA8	26.7267	-0.220197	0.50388	-0.437002	0.66211	0.842696	NOT	17	15	30	34	17	38	25	39
CA9	78.0849	-0.225375	0.33967	-0.663513	0.507002	0.747064	NOT	65	90	73	46	109	58	81	116
CAAP1	31.366	0.00795911	0.485219	0.0164031	0.986913	0.994891	NOT	33	9	42	23	28	31	34	67
CAB39	302.996	0.375058	0.195448	1.91897	0.0549882	0.224035	NOT	256	155	242	227	553	379	255	628
CAB39L	115.613	-0.0490778	0.264463	-0.185575	0.852778	0.937386	NOT	100	75	139	81	137	137	99	211
CABIN1	169.73	0.0783865	0.303988	0.25786	0.796515	0.913498	NOT	117	99	221	123	202	285	116	285
CABLES1	25.6591	-0.337628	0.496128	-0.680525	0.496172	0.737972	NOT	30	27	17	19	44	37	11	26
CABLES2	63.1013	0.705997	0.397856	1.7745	0.0759798	0.274469	NOT	22	47	68	24	119	111	43	145
CACHD1	21.6345	-0.868851	0.544521	-1.59562	0.110573	0.335557	NOT	11	34	18	27	22	23	7	30
CACNA1C	28.6087	-0.245	0.492673	-0.497287	0.618987	0.816846	NOT	29	25	14	32	37	41	24	24
CACNA1H	195.912	-0.842308	0.436822	-1.92827	0.0538222	0.22152	NOT	215	244	145	207	135	209	189	78
CACNA2D1	30.6297	1.00141	0.419699	2.38602	0.0170316	0.105733	NOT	12	12	21	23	52	54	35	66
CACNB1	14.7381	-0.785637	0.589606	-1.33248	0.182703	0.445411	NOT	17	10	10	24	13	8	13	21
CACNB3	59.4687	0.0696997	0.42016	0.165888	0.868245	0.944012	NOT	43	18	100	41	115	71	52	74
CACTIN	104.85	-0.471778	0.320162	-1.47356	0.1406	0.385711	NOT	111	45	134	123	176	94	69	122
CACUL1	112.212	-0.127014	0.297424	-0.427048	0.669344	0.846434	NOT	132	50	94	115	172	113	91	184
CACYBP	194.777	-0.0548661	0.263652	-0.2081	0.835151	0.928095	NOT	213	112	201	139	318	141	190	354
CAD	19.5855	-0.753631	0.559789	-1.34628	0.178214	0.438959	NOT	11	15	44	15	21	9	14	35
CADM1	23.9424	-0.498022	0.461653	-1.07878	0.280686	0.556515	NOT	23	12	40	21	25	24	15	41
CADM3	24.553	-0.16608	0.610031	-0.272249	0.785431	0.907753	NOT	30	4	41	15	33	15	34	29
CADPS	13.0212	-0.515031	0.611196	-0.842661	0.399418	0.664832	NOT	15	12	14	9	12	10	16	12
CADPS2	21.9435	0.208082	0.483005	0.430807	0.666609	0.84551	NOT	24	13	21	10	30	19	23	52
CALCOCO1	65.9682	-0.52335	0.366107	-1.4295	0.15286	0.406476	NOT	74	84	44	48	73	47	56	102
CALCOCO2	279.719	-0.443663	0.195883	-2.26494	0.0235164	0.131006	NOT	282	247	298	240	360	217	220	441
CALCRL	28.618	0.151124	0.493761	0.306067	0.759553	0.893443	NOT	39	9	26	18	52	28	15	77
CALD1	691.161	-0.554935	0.22728	-2.44164	0.0146208	0.0963921	NOT	788	593	702	635	824	525	632	794
CALM1	2707.77	0.220761	0.152491	1.4477	0.147702	0.397976	NOT	1890	2029	2270	2071	5076	2857	2321	5235
CALM2	1205.43	-0.0509646	0.195236	-0.261041	0.794061	0.912029	NOT	1009	821	1205	1054	1987	890	1103	2310
CALM3	2488.16	0.281433	0.178125	1.57998	0.114111	0.342543	NOT	2255	1331	2213	1716	4543	2904	1925	5320
CALML4	496.188	-0.426437	0.211533	-2.01594	0.0438064	0.196089	NOT	394	382	667	471	838	410	267	815
CALR	1034.98	-0.000171476	0.179886	-0.00095325	0.999239	0.999651	NOT	834	737	978	891	1993	1139	640	1852
CALU	105.598	0.332526	0.349003	0.952787	0.340698	0.612105	NOT	49	102	103	54	176	182	68	188
CALY	16.9165	0.00632194	0.691672	0.00914009	0.992707	0.997104	NOT	23	5	6	21	17	19	26	13
CAMK1	14.5457	-0.269091	0.628155	-0.428384	0.668372	0.84606	NOT	18	6	6	22	22	15	13	16
CAMK1D	21.103	-0.112742	0.497422	-0.226654	0.820693	0.922802	NOT	22	21	19	10	38	29	12	27
CAMK2A	33.183	-0.691158	0.557434	-1.23989	0.215016	0.486103	NOT	47	29	18	38	28	25	42	16
CAMK2D	127.604	-0.0177323	0.34526	-0.0513594	0.959039	0.983205	NOT	69	52	134	178	190	123	122	218
CAMK2G	121.981	-0.444548	0.256436	-1.73356	0.0829961	0.287345	NOT	130	100	123	112	144	146	80	156
KLHL3	57.5988	2.4549	0.508093	4.83159	1.35449e-06	6.4966e-05	UP	11	10	22	17	138	207	25	140
CAMK4	29.8914	0.258193	0.495195	0.521398	0.60209	0.807808	NOT	16	31	10	30	57	23	26	72
CAMKK1	29.724	-0.258435	0.445971	-0.579488	0.56226	0.783517	NOT	29	29	33	17	55	21	13	67
CAMKK2	151.446	-0.00675007	0.313566	-0.0215268	0.982825	0.993455	NOT	147	66	145	151	234	188	153	164
CAMLG	26.9274	0.270431	0.52434	0.515754	0.606026	0.81004	NOT	21	16	38	8	38	51	23	32
CAMSAP1	146.102	0.24734	0.294061	0.841116	0.400283	0.665614	NOT	81	88	165	115	195	213	157	210
CAMSAP2	75.4683	-0.464248	0.312367	-1.48623	0.137219	0.380417	NOT	79	68	86	56	87	70	71	83
CAMSAP3	373.966	-0.236614	0.269087	-0.87932	0.379228	0.647822	NOT	180	302	517	362	520	427	275	547
CAMTA1	67.7494	-0.0809102	0.290638	-0.278388	0.780715	0.905065	NOT	55	38	71	69	96	72	59	113
CAMTA2	308.167	0.468007	0.239208	1.95649	0.0504079	0.212363	NOT	175	225	253	201	469	509	288	537
CAND1	135.819	-0.228023	0.313498	-0.727352	0.467011	0.719688	NOT	174	126	100	79	196	103	97	287
CAND2	24.9463	0.312744	0.613489	0.509779	0.610206	0.811613	NOT	5	9	15	45	45	37	15	52
SGK2	25.451	2.45065	0.805895	3.04091	0.00235866	0.0262051	UP	6	7	14	0	109	25	4	138
CANX	698.873	0.123545	0.243819	0.506707	0.61236	0.812764	NOT	603	619	442	512	1522	699	445	1360
CAP1	667.668	0.00175673	0.212066	0.00828388	0.99339	0.997268	NOT	666	468	606	475	1156	505	568	1382
CAP2	27.6775	0.243201	0.695828	0.349513	0.726704	0.877175	NOT	19	26	12	24	26	72	26	6
CAPG	143.836	-0.135282	0.327577	-0.412979	0.679622	0.852317	NOT	81	153	154	109	311	110	70	294
CAPN1	845.506	0.240244	0.171886	1.3977	0.162204	0.417961	NOT	675	569	766	569	1444	1104	614	1722
CAPN10	123.058	0.0804064	0.337268	0.238405	0.811567	0.919751	NOT	54	143	105	87	243	103	91	258
CAPN13	42.8028	0.257341	0.488177	0.527148	0.598091	0.805028	NOT	29	34	42	24	61	97	32	31
CAPN15	570.977	0.945887	0.210199	4.49996	6.79661e-06	0.00024751	NOT	297	296	452	261	1082	996	514	1354
CAPN2	191.871	-0.374473	0.278876	-1.34279	0.179338	0.440744	NOT	162	210	129	199	259	168	167	252
CAPN5	619.146	0.863369	0.209194	4.12713	3.67322e-05	0.000985006	NOT	308	352	514	294	1215	1033	578	1339
CAPN7	27.3628	-0.481642	0.487179	-0.988634	0.322842	0.595749	NOT	30	37	20	16	29	18	17	62
CAPN9	25.605	-0.181635	0.692458	-0.262305	0.793086	0.911366	NOT	18	36	3	28	23	48	7	49
CAPNS1	826.772	-0.0815688	0.196375	-0.415374	0.677868	0.851414	NOT	837	554	650	769	1408	776	571	1608
CAPRIN1	533.669	-0.25063	0.22943	-1.0924	0.274655	0.550664	NOT	520	388	493	521	762	338	450	1070
CAPZA1	269.992	-0.513785	0.249891	-2.05604	0.0397791	0.185663	NOT	294	256	247	247	367	153	186	511
CAPZA2	128.44	-0.705092	0.291703	-2.41716	0.0156423	0.100909	NOT	135	132	141	118	164	59	79	240
CAPZB	437.72	-0.416567	0.18537	-2.24722	0.0246257	0.135018	NOT	430	364	423	438	603	334	302	777
CARD10	182.678	0.816932	0.323066	2.52869	0.0114489	0.081377	NOT	88	67	213	88	373	316	122	452
CARD11	48.5974	0.433289	0.458735	0.944531	0.344898	0.614721	NOT	44	28	18	45	113	24	45	133
CARD14	75.7683	0.426779	0.308955	1.38136	0.167168	0.425272	NOT	45	43	56	70	143	118	67	115
CARD19	53.4542	-0.120146	0.341984	-0.35132	0.725348	0.876375	NOT	45	43	54	43	109	32	45	91
CARD6	114.531	-0.0665744	0.334157	-0.199231	0.842082	0.932145	NOT	92	58	183	71	200	112	61	255
CARD9	49.8648	-0.184481	0.405539	-0.454902	0.64918	0.835248	NOT	27	69	49	27	76	42	40	89
CARHSP1	239.121	0.430491	0.2419	1.77962	0.0751374	0.272493	NOT	213	100	171	196	487	269	207	510
CARM1	52.1568	-0.48022	0.400104	-1.20024	0.230047	0.502763	NOT	52	60	36	49	63	25	37	116
CARMIL1	92.6984	0.0659037	0.318064	0.207203	0.835852	0.928257	NOT	81	34	103	90	169	93	60	201
CARMIL2	52.3157	0.658385	0.338079	1.94743	0.0514835	0.215084	NOT	26	25	48	38	101	61	42	150
CARNMT1	134.686	0.450118	0.22456	2.00445	0.0450222	0.199107	NOT	98	89	98	91	284	157	124	256
CARS	150.399	-0.41855	0.360576	-1.16078	0.24573	0.518764	NOT	117	49	193	227	238	152	90	201
CARS2	179.575	0.0626488	0.295616	0.211926	0.832165	0.927256	NOT	97	175	140	162	313	215	93	395
CASC1	41.4259	-1.18098	0.43949	-2.68715	0.00720639	0.0586401	NOT	45	59	32	49	47	40	17	24
CASC3	162.378	0.112591	0.238712	0.47166	0.63717	0.828034	NOT	134	97	160	131	271	233	110	269
CASC4	50.7883	0.0470745	0.427932	0.110005	0.912406	0.962781	NOT	60	49	37	17	66	72	31	105
CASD1	28.538	-0.0602931	0.50918	-0.118412	0.905741	0.960082	NOT	10	22	42	24	30	44	28	31
CASK	100.745	0.149462	0.337328	0.443076	0.657711	0.840136	NOT	120	67	77	52	175	69	94	238
CASKIN1	62.9685	1.01738	0.360266	2.82398	0.00474315	0.0434506	NOT	37	19	35	48	121	129	51	138
CASKIN2	92.1711	0.54058	0.318875	1.69527	0.090024	0.300309	NOT	48	55	70	76	130	173	68	194
CASP1	358.867	-0.988452	0.248152	-3.98324	6.79808e-05	0.00165042	NOT	490	277	492	341	386	169	239	476
TRPV6	43.0574	2.44853	0.659205	3.71436	0.000203717	0.00382553	UP	20	16	0	6	124	128	29	102
CASP2	98.7442	0.275849	0.31964	0.862998	0.388138	0.655658	NOT	102	38	103	60	201	85	90	208
CASP3	423.226	-0.896439	0.344003	-2.6059	0.00916319	0.0697076	NOT	700	323	286	496	479	159	263	732
CASP6	283.517	-0.268775	0.261579	-1.02751	0.304181	0.57924	NOT	362	177	282	214	454	197	193	575
CASP7	722.906	-0.102892	0.242523	-0.424257	0.671378	0.847696	NOT	807	473	500	686	1209	566	521	1535
CASP8	67.3981	-0.694686	0.411591	-1.68781	0.0914485	0.302665	NOT	60	31	95	97	86	24	52	117
CASP8AP2	29.6068	0.165359	0.46048	0.359101	0.719519	0.874259	NOT	28	11	38	18	30	39	31	57
CASP9	38.5982	-0.349473	0.395813	-0.882923	0.377278	0.6458	NOT	31	22	66	29	58	31	33	54
CAST	304.856	0.256886	0.269885	0.951836	0.34118	0.612198	NOT	313	187	263	162	506	238	290	767
CASTOR1	32.2723	-0.222583	0.482277	-0.461525	0.644422	0.83226	NOT	9	21	42	45	52	32	26	44
SLC2A6	169.991	2.43718	0.29403	8.28889	1.14308e-16	7.7421e-14	UP	36	33	62	47	422	448	169	454
CASZ1	103.496	0.210623	0.312474	0.674048	0.500281	0.740839	NOT	73	82	110	54	128	164	93	169
CAT	381.15	0.522059	0.202244	2.58134	0.00984178	0.0737758	NOT	274	254	262	242	784	419	304	962
CATSPER2	51.7591	0.000879724	0.358318	0.00245515	0.998041	0.998888	NOT	47	40	57	28	65	76	44	73
CATSPERG	22.5545	0.254248	0.523226	0.485925	0.627021	0.82175	NOT	20	23	17	7	46	36	15	30
CAV1	75.6675	-0.50835	0.385178	-1.31978	0.186909	0.450938	NOT	102	50	47	92	112	43	73	88
CAV2	76.8091	-0.404648	0.388765	-1.04085	0.297943	0.573479	NOT	87	42	71	91	90	34	86	125
CAVIN1	686.35	-0.337234	0.196491	-1.71628	0.086111	0.292778	NOT	673	540	814	531	963	722	540	849
CAVIN2	179.895	-0.438618	0.249503	-1.75797	0.0787533	0.280442	NOT	211	128	158	187	206	145	152	282
CAVIN3	232.61	-0.645767	0.237109	-2.72351	0.0064593	0.054438	NOT	181	234	258	264	282	144	161	383
CBFA2T2	28.8925	-0.200994	0.633146	-0.317453	0.7509	0.888333	NOT	37	23	43	2	59	27	10	59
CBFA2T3	38.7608	0.109961	0.392093	0.280447	0.779135	0.904112	NOT	16	39	39	29	69	41	29	77
CBFB	116.112	-0.0389447	0.305788	-0.127358	0.898657	0.958183	NOT	90	69	114	121	188	72	90	289
CBL	14.6887	0.435079	0.656407	0.662819	0.507447	0.747391	NOT	17	6	13	6	39	5	19	27
CBLB	38.936	-0.110246	0.465978	-0.236591	0.812974	0.920211	NOT	44	30	30	29	75	12	41	73
LOC106509717	12.9652	2.43653	0.812776	2.99779	0.00271949	0.029051	UP	0	4	1	8	48	14	23	28
CBLL1	65.6205	-0.276452	0.32335	-0.854962	0.392572	0.659541	NOT	55	33	83	72	85	52	56	119
CBR3	14.9828	-0.884923	0.711724	-1.24335	0.213738	0.484421	NOT	8	14	39	7	16	4	6	37
CBR4	39.9191	0.100885	0.482021	0.209296	0.834217	0.928053	NOT	17	51	36	21	53	24	38	111
CBX1	175.556	-0.180741	0.253397	-0.713271	0.475678	0.725813	NOT	207	120	156	136	265	132	139	351
CBX2	76.3376	-0.570159	0.40675	-1.40174	0.160992	0.416566	NOT	42	54	163	56	77	89	55	83
CBX3	63.9299	-0.739954	0.28677	-2.5803	0.00987134	0.0738021	NOT	72	51	69	73	69	53	42	84
CBX4	50.7238	0.606456	0.391007	1.55101	0.120899	0.353442	NOT	46	25	42	22	94	90	27	122
CBX5	252.327	-0.462993	0.241391	-1.91802	0.0551084	0.22437	NOT	310	164	281	224	375	163	178	431
CBX6	208.634	-0.0308124	0.258864	-0.119029	0.905252	0.959865	NOT	182	166	167	177	275	263	209	262
ABHD4	105.665	2.42875	0.270657	8.97354	2.87142e-19	2.60615e-16	UP	31	25	32	22	272	207	129	337
CBX8	36.4909	-0.471642	0.545928	-0.863928	0.387628	0.65534	NOT	12	17	51	64	74	19	31	36
CBY1	52.3158	0.0639163	0.425246	0.150304	0.880524	0.950184	NOT	35	36	20	75	98	47	44	96
CC2D1A	203.643	0.459549	0.210002	2.1883	0.0286475	0.147905	NOT	130	114	159	167	343	282	181	428
CC2D1B	118.371	-0.273681	0.273591	-1.00033	0.317151	0.59135	NOT	103	69	126	137	197	94	71	231
CC2D2A	18.2351	-0.22556	0.547268	-0.412156	0.680225	0.852557	NOT	27	7	20	12	20	22	17	24
CCAR1	412.46	-0.9777	0.225938	-4.3273	1.50946e-05	0.000472418	NOT	554	359	545	368	501	213	260	494
CCAR2	421.356	-0.0400285	0.242402	-0.165133	0.86884	0.944311	NOT	257	304	487	384	682	553	226	782
CCBE1	20.723	-0.377095	0.645315	-0.584358	0.558979	0.781723	NOT	22	15	10	29	29	3	26	34
CCDC102A	35.4154	0.122768	0.442708	0.277311	0.781541	0.90521	NOT	32	19	51	14	63	25	34	77
CCDC106	16.6362	-1.08446	0.555438	-1.95244	0.0508857	0.213315	NOT	19	10	32	17	22	7	6	26
CCDC107	147.461	0.509152	0.336575	1.51275	0.130344	0.368896	NOT	95	107	48	142	294	203	125	291
CCDC115	103.679	0.191414	0.252974	0.756656	0.449256	0.705923	NOT	93	74	82	71	158	113	85	235
CCDC117	143.507	-0.0302788	0.254451	-0.118997	0.905278	0.959865	NOT	134	120	112	109	194	133	147	249
CCDC12	199.898	-0.384951	0.234367	-1.64252	0.100483	0.318835	NOT	143	193	234	182	302	185	106	356
PDGFRL	17.6269	2.41953	0.61515	3.93323	8.38121e-05	0.00192229	UP	5	0	8	6	44	35	24	52
CCDC124	153.334	0.0707613	0.23066	0.306777	0.759013	0.893297	NOT	117	96	152	135	217	153	125	347
CCDC125	81.6477	-0.757841	0.343951	-2.20334	0.0275709	0.144711	NOT	83	40	143	85	84	65	64	91
ABHD1	15.4693	2.39614	0.764265	3.13522	0.00171724	0.0203431	UP	0	6	2	8	50	24	9	70
CCDC127	72.9044	-0.0999207	0.396162	-0.252222	0.800869	0.915202	NOT	30	55	124	49	105	104	41	121
CCDC130	67.8902	-0.278179	0.437203	-0.63627	0.5246	0.75948	NOT	32	21	123	83	111	62	50	101
CCDC137	151.724	-0.379293	0.343194	-1.10519	0.269079	0.546072	NOT	70	97	252	167	213	98	132	249
CCDC138	15.507	-0.667155	0.669133	-0.997044	0.318743	0.592633	NOT	20	3	25	17	11	18	15	11
CCDC149	70.6556	0.12077	0.400805	0.30132	0.763171	0.895629	NOT	54	25	71	78	113	91	82	66
CCDC15	14.7851	0.235023	0.752883	0.312165	0.754915	0.890635	NOT	18	0	10	18	21	10	15	41
CCDC150	32.1034	-0.710579	0.422466	-1.68198	0.0925728	0.304507	NOT	36	21	44	33	32	15	27	54
CCDC152	14.1586	1.63278	1.02705	1.58978	0.111885	0.338061	NOT	0	7	2	13	9	71	4	14
CCDC167	74.5515	0.233718	0.37987	0.615257	0.538385	0.76887	NOT	85	48	39	52	160	47	85	130
CCDC174	64.2799	-0.516869	0.321287	-1.60874	0.107673	0.331186	NOT	82	45	78	48	76	45	54	99
CCDC18	13.7746	-1.01216	0.682085	-1.48392	0.137831	0.38151	NOT	9	9	31	14	12	4	16	11
CCDC186	172.556	0.46089	0.245527	1.87715	0.060498	0.237939	NOT	146	93	154	94	328	178	144	446
CCDC189	24.2502	-0.142783	0.59294	-0.240806	0.809706	0.918749	NOT	16	31	29	7	39	15	34	21
CCDC191	13.2511	-0.917999	0.678906	-1.35217	0.176319	0.436969	NOT	11	27	11	6	23	9	6	11
CCDC22	66.9384	-0.573283	0.442324	-1.29607	0.194951	0.461576	NOT	24	83	121	41	68	75	36	103
CCDC24	34.7697	0.891086	0.515299	1.72926	0.0837624	0.28915	NOT	31	11	29	11	43	72	50	43
CCDC25	124.378	-0.12289	0.287292	-0.427752	0.668832	0.846369	NOT	125	65	121	122	155	108	133	203
CCDC28A	50.2071	0.634351	0.368819	1.71995	0.0854413	0.291365	NOT	18	36	41	35	102	46	62	108
CCDC28B	35.1327	0.319657	0.457082	0.699344	0.484337	0.731191	NOT	13	16	49	29	71	51	32	44
CCDC30	46.27	-0.17263	0.48777	-0.353916	0.723402	0.875517	NOT	18	18	56	74	72	60	39	44
CCDC34	243.121	-1.18526	0.208225	-5.6922	1.25416e-08	1.24352e-06	NOT	302	224	318	278	228	162	143	221
CCDC43	62.8565	-0.29779	0.302165	-0.985523	0.324367	0.597069	NOT	51	53	82	46	81	52	50	115
CCDC47	38.3152	-0.243107	0.447477	-0.543285	0.586934	0.797838	NOT	29	47	15	41	50	39	32	58
CCDC50	192.689	0.517217	0.299709	1.72573	0.0843956	0.289978	NOT	141	161	137	79	302	182	239	447
CCDC51	46.8159	-0.113423	0.37974	-0.298687	0.765179	0.897094	NOT	36	29	63	36	68	31	55	73
CCDC57	35.656	0.0650309	0.42448	0.153201	0.87824	0.949194	NOT	27	23	50	19	58	40	17	91
CCDC58	84.5621	-0.935716	0.290111	-3.22538	0.00125808	0.0160476	NOT	83	87	118	82	103	39	53	117
CCDC59	35.0084	-0.620128	0.494416	-1.25426	0.209747	0.480544	NOT	25	22	73	27	59	11	25	58
CCDC6	175.763	0.157239	0.265983	0.591162	0.554412	0.779186	NOT	189	109	153	103	314	175	117	422
CCDC61	120.253	-0.0639708	0.276262	-0.231559	0.816881	0.921362	NOT	79	108	111	106	173	162	98	158
CCDC62	22.9792	-0.457154	0.596195	-0.766787	0.443208	0.702029	NOT	24	7	11	46	35	13	16	42
CCDC66	23.7001	-1.17838	0.525174	-2.2438	0.0248454	0.135342	NOT	22	16	41	32	21	6	21	25
CCDC68	46.3201	-0.359545	0.36927	-0.973663	0.330224	0.602584	NOT	40	50	38	41	48	35	46	76
CCDC69	121.811	1.09497	0.276304	3.96291	7.40417e-05	0.00175074	NOT	74	49	79	58	352	122	131	300
CCDC71	32.4539	-0.739051	0.460274	-1.60568	0.108345	0.332245	NOT	48	29	42	17	52	14	17	54
CCDC71L	51.1615	0.239822	0.384765	0.623293	0.533092	0.764922	NOT	50	41	24	37	69	45	54	123
CCDC77	12.4935	-1.26739	0.74012	-1.71241	0.086821	0.293697	NOT	13	9	21	17	14	0	7	21
CCDC8	27.5914	-0.982054	0.473118	-2.0757	0.0379213	0.180708	NOT	34	19	28	40	24	11	25	33
CCDC80	91.1893	-0.710928	0.295168	-2.40855	0.0160159	0.102424	NOT	97	106	102	66	105	67	72	106
CCDC82	22.1126	-0.173102	0.491956	-0.351865	0.72494	0.87621	NOT	19	14	26	20	23	32	9	49
CCDC84	18.315	0.268422	0.619197	0.433501	0.664651	0.844066	NOT	18	2	28	10	36	15	21	32
CCDC85B	109.23	0.805913	0.245499	3.28275	0.00102801	0.0137234	NOT	70	64	71	58	240	163	94	243
SLC5A4	71.6753	2.37292	0.629191	3.77138	0.000162347	0.0032357	UP	16	29	11	18	94	345	21	125
CCDC86	31.2666	0.307336	0.444552	0.691339	0.489353	0.733097	NOT	27	23	26	16	70	28	39	36
CCDC88A	30.1614	0.0877088	0.493451	0.177746	0.858923	0.939737	NOT	13	32	38	14	58	18	34	52
IL17RA	78.5229	2.36521	0.359346	6.58199	4.6419e-11	8.29845e-09	UP	27	12	20	26	222	197	74	198
CCDC88C	152.68	-0.701651	0.313234	-2.24002	0.0250895	0.136207	NOT	100	90	277	181	167	114	109	213
CCDC9	298.702	-0.286567	0.21466	-1.33498	0.181882	0.444036	NOT	243	285	305	250	368	344	186	522
CCDC90B	45.7954	-0.397704	0.376282	-1.05693	0.290543	0.565136	NOT	49	23	47	55	42	48	36	76
CCDC91	37.6217	-0.550589	0.464258	-1.18596	0.23564	0.508175	NOT	43	27	63	19	71	19	32	37
CCDC92	23.9417	-0.573128	0.548084	-1.04569	0.295703	0.570098	NOT	31	4	40	24	29	21	17	33
CCDC93	48.1665	-0.51226	0.368379	-1.39058	0.164353	0.421398	NOT	46	26	66	54	68	26	35	87
CCDC94	73.6531	-0.0289548	0.368408	-0.0785944	0.937355	0.974693	NOT	66	72	70	37	149	106	35	99
CCDC97	224.05	0.45575	0.24869	1.83261	0.0668612	0.253664	NOT	146	122	237	133	432	354	155	434
CCER2	58.8401	-0.89769	0.442564	-2.02839	0.0425209	0.192889	NOT	47	106	54	37	51	63	37	49
CCHCR1	129.004	-0.60727	0.283539	-2.14175	0.0322133	0.161053	NOT	123	142	129	115	143	90	120	155
PTPRR	13.7967	2.36039	0.778879	3.03049	0.00244158	0.0268038	UP	0	3	5	7	28	49	11	27
CCL11	96.2236	-0.993652	0.292833	-3.39324	0.000690709	0.0101222	NOT	149	77	93	105	114	75	42	113
CCL14	46.8864	-0.0618596	0.500426	-0.123614	0.901621	0.959085	NOT	63	25	49	23	71	27	73	42
LOC106505221	12.6513	2.34324	0.721039	3.24981	0.00115482	0.015056	UP	6	3	5	0	35	16	16	50
CCL2	252.309	-0.712298	0.279813	-2.54562	0.0109084	0.0787689	NOT	301	184	225	326	369	123	178	355
LOC102158002	85.4138	2.33818	0.574859	4.0674	4.754e-05	0.0012194	UP	4	50	18	17	337	71	68	378
CCL21	89.3826	-0.148049	0.267033	-0.554423	0.579289	0.792744	NOT	61	78	90	82	119	101	61	168
CCL24	42.0183	0.138255	0.483851	0.285739	0.775078	0.901475	NOT	33	9	63	34	44	67	27	94
CCL25	1379.21	0.753494	0.22734	3.31439	0.000918437	0.0126426	NOT	662	685	1220	888	3289	2262	1029	2640
SLC5A6	325.516	2.33372	0.313483	7.44451	9.7308e-14	3.37687e-11	UP	60	75	144	85	803	921	281	818
CCL28	18.8165	0.419896	0.662648	0.633664	0.5263	0.760448	NOT	23	11	16	4	61	6	14	45
GALNT6	22.1921	2.31779	0.668057	3.46945	0.000521526	0.0080543	UP	6	4	0	14	58	50	20	71
CCL20	51.9969	2.31317	0.610658	3.78799	0.00015187	0.0030736	UP	9	3	32	17	149	17	96	213
CCM2	162.899	0.447038	0.271297	1.64778	0.0993971	0.317312	NOT	80	104	166	112	297	269	127	279
CCNA2	33.7554	-0.608073	0.474339	-1.28194	0.199865	0.467712	NOT	56	25	39	16	24	32	22	62
MIEF2	45.6774	2.30633	0.491681	4.6907	2.72276e-06	0.000115317	UP	17	11	15	8	106	154	43	70
CCNB1IP1	82.1452	-0.876638	0.341259	-2.56884	0.0102041	0.0752956	NOT	62	50	129	120	84	47	50	131
CCNB2	62.9405	-1.09359	0.43644	-2.50571	0.0122205	0.0851678	NOT	67	41	123	63	90	13	38	81
CCNB3	23.1391	-0.71121	0.822886	-0.864287	0.38743	0.655243	NOT	9	24	39	24	20	0	39	17
CCNC	155.778	-0.0229119	0.26941	-0.0850448	0.932226	0.971158	NOT	142	102	155	126	318	102	113	329
CCND1	463.677	0.319301	0.231099	1.38166	0.167075	0.425128	NOT	262	284	505	338	1067	420	411	878
CCND2	20.0481	-0.244714	0.49755	-0.491839	0.622833	0.818778	NOT	28	14	16	14	41	15	14	29
CCND3	371.936	0.280893	0.227061	1.23709	0.216055	0.48711	NOT	280	203	344	299	849	388	234	805
CCNDBP1	76.6544	0.298786	0.280323	1.06586	0.286485	0.562271	NOT	59	43	73	56	141	83	54	188
CCNF	86.5233	-1.10542	0.381851	-2.8949	0.00379282	0.0370153	NOT	63	42	170	131	71	67	51	89
CCNG1	456.831	-0.2533	0.266159	-0.95169	0.341254	0.612198	NOT	448	501	403	268	628	340	425	763
CCNG2	44.1717	0.944294	0.391224	2.41369	0.0157918	0.101486	NOT	23	13	26	39	79	51	51	129
CCNH	73.4382	-0.0506402	0.309357	-0.163695	0.869971	0.945018	NOT	52	54	98	48	103	97	48	132
CCNI	460.779	0.331586	0.175166	1.89299	0.0583597	0.232395	NOT	330	347	356	311	817	555	400	939
CCNJ	28.7865	-0.587663	0.47212	-1.24473	0.21323	0.484292	NOT	34	31	16	31	40	13	19	55
CCNJL	22.402	-0.889515	0.515538	-1.72541	0.0844533	0.290007	NOT	39	18	28	12	32	11	16	23
CCNK	196.434	0.150942	0.232799	0.648379	0.51674	0.753609	NOT	137	100	205	184	314	226	184	341
CCNL2	320.682	-0.450051	0.253183	-1.77757	0.075474	0.273249	NOT	259	216	410	359	418	374	230	333
CCNT1	58.9188	0.0253065	0.335589	0.0754091	0.939889	0.975702	NOT	31	43	78	45	79	65	46	126
CCNT2	56.0047	0.127888	0.4037	0.316789	0.751404	0.888536	NOT	20	31	78	53	75	79	53	85
CCNY	399.418	0.30283	0.206294	1.46796	0.142116	0.388245	NOT	291	312	344	235	703	538	290	823
CCNYL1	82.6292	-0.100908	0.345687	-0.291906	0.770358	0.89982	NOT	84	62	76	61	146	40	89	143
CCP110	27.6522	-0.0815948	0.49239	-0.165712	0.868384	0.944076	NOT	39	13	27	16	45	37	25	25
CCPG1	39.3169	0.111766	0.43514	0.256851	0.797294	0.91386	NOT	45	16	42	25	66	67	19	64
CCR5	21.5009	0.00403227	0.489388	0.0082394	0.993426	0.997268	NOT	17	11	15	28	41	26	17	27
CCS	236.543	-0.0350269	0.255928	-0.136862	0.89114	0.95484	NOT	142	245	226	173	455	219	162	436
CCSAP	58.1614	1.1549	0.502848	2.29671	0.0216351	0.124402	NOT	46	5	50	24	157	83	32	191
CCSER2	123.229	-0.451185	0.224297	-2.01155	0.0442674	0.197099	NOT	117	103	124	127	161	121	80	184
CCT2	328.767	-0.514289	0.231777	-2.21889	0.0264939	0.141118	NOT	433	269	278	293	383	274	228	542
CCT3	268.801	-0.295602	0.229372	-1.28875	0.197486	0.464912	NOT	276	154	259	300	381	224	197	488
CCT4	305.317	-0.285893	0.17971	-1.59085	0.111642	0.337588	NOT	268	243	340	265	414	305	239	464
CCT5	384.001	-0.543595	0.241451	-2.25137	0.0243624	0.134323	NOT	465	228	464	376	516	272	215	727
CCT6A	280.675	-0.177961	0.317202	-0.561035	0.574774	0.790046	NOT	271	148	216	354	461	147	253	562
CCT7	473.757	-0.502077	0.198616	-2.52788	0.0114755	0.0814677	NOT	575	336	488	450	713	405	276	717
CCT8	169.309	-0.273298	0.216074	-1.26484	0.20593	0.475586	NOT	152	141	148	169	221	173	127	277
CCZ1	75.503	-0.624728	0.295032	-2.11749	0.0342179	0.168158	NOT	59	69	111	69	111	50	43	121
LOC100154873	12.5281	2.28572	0.950467	2.40484	0.0161795	0.102854	UP	3	10	0	0	16	17	16	66
CD14	17.836	-0.0452738	0.572729	-0.0790493	0.936993	0.974404	NOT	5	13	15	27	28	15	13	40
ENPP7	1870.82	2.2791	0.919573	2.47843	0.0131961	0.0897926	UP	181	835	602	451	1705	9328	1558	1007
CD163	46.0032	-0.360945	0.503676	-0.716622	0.473607	0.724867	NOT	41	70	15	36	46	31	50	73
CD164	167.975	0.201978	0.265438	0.760925	0.446702	0.704259	NOT	120	126	188	89	275	246	115	310
CD1D	33.0188	-0.324701	0.435289	-0.745945	0.455701	0.710972	NOT	38	16	24	44	39	28	22	70
CD2	106.55	0.123665	0.262605	0.470915	0.637701	0.828113	NOT	87	81	76	91	177	91	98	226
ONECUT2	590.978	2.27324	0.293307	7.75037	9.16226e-15	4.1579e-12	UP	150	252	157	95	1550	1141	784	1611
CD200R1L	16.68	1.08592	1.6952	0.640587	0.521791	0.758281	NOT	0	30	0	1	57	20	7	50
CD209	80.9799	0.02448	0.334303	0.0732269	0.941626	0.97616	NOT	57	73	90	46	130	57	94	135
BST1	102.359	2.2438	0.454915	4.93234	8.12504e-07	4.24192e-05	UP	16	36	17	46	235	329	76	223
PRDM16	184.452	2.23135	0.373124	5.98017	2.22904e-09	2.65661e-07	UP	43	94	43	27	527	352	172	615
CD248	19.03	-0.236481	0.722986	-0.327089	0.743601	0.885521	NOT	0	16	32	22	26	23	11	33
CD274	15.3844	0.0644383	0.737321	0.0873951	0.930357	0.970403	NOT	30	7	5	7	29	5	22	23
CD276	77.0048	1.15454	0.389098	2.96721	0.00300515	0.0312128	NOT	46	24	53	38	148	195	44	170
CD2AP	392.802	0.241651	0.202612	1.19268	0.232995	0.505979	NOT	385	233	318	260	637	434	350	827
CD2BP2	175.882	0.128522	0.228694	0.561981	0.574129	0.78935	NOT	126	138	145	145	327	230	127	280
CD300A	12.9116	-0.152709	0.733568	-0.208173	0.835094	0.928095	NOT	4	23	7	9	28	6	6	32
CD300LF	14.4331	0.200008	0.633198	0.315869	0.752102	0.888754	NOT	3	13	20	9	23	24	12	18
SLC35D1	62.8676	2.22434	0.399768	5.56408	2.63537e-08	2.30332e-06	UP	16	8	25	26	150	155	51	201
CD34	31.4328	0.941843	0.514112	1.83198	0.0669545	0.253842	NOT	12	16	38	8	70	60	16	82
CD36	47.0916	0.304899	0.466426	0.653692	0.51331	0.75158	NOT	46	20	31	42	46	66	72	50
CD37	48.4073	0.731178	0.397373	1.84003	0.0657638	0.251604	NOT	23	43	34	19	107	41	51	130
CD38	41.9754	-0.298958	0.385642	-0.775223	0.438208	0.698611	NOT	35	26	61	36	65	30	22	97
CD3D	17.2965	0.61987	0.884378	0.70091	0.483359	0.730776	NOT	2	19	25	0	36	8	12	70
CD3E	84.0175	1.1273	0.911589	1.23664	0.216222	0.487337	NOT	2	85	58	25	258	58	77	271
CD3EAP	52.3962	0.0547497	0.364818	0.150074	0.880706	0.950206	NOT	32	32	64	46	80	38	40	140
CD3G	39.305	0.905141	0.492555	1.83765	0.0661145	0.252537	NOT	9	26	31	25	100	20	44	124
CD4	28.5021	0.50274	0.626134	0.802927	0.422017	0.684639	NOT	22	39	10	3	62	37	18	67
CD40	34.1041	-0.0346863	0.524509	-0.066131	0.947274	0.979615	NOT	22	51	13	22	40	51	31	41
CD44	71.77	-0.074792	0.418049	-0.178907	0.858011	0.939574	NOT	29	68	43	98	120	61	78	90
STOM	799.337	2.22382	0.246145	9.03461	1.64585e-19	1.61828e-16	UP	189	186	323	248	2039	1965	987	1637
CD47	174.667	-1.0091	0.261844	-3.85382	0.000116291	0.00252692	NOT	180	156	239	203	220	95	124	151
CD48	40.7818	0.227274	0.353372	0.643157	0.520122	0.757238	NOT	33	28	28	35	63	52	28	94
TMEM65	317.7	2.22182	0.33899	6.55422	5.59329e-11	9.70518e-09	UP	106	124	64	67	894	309	588	915
CD52	124.562	1.19168	0.46473	2.56423	0.0103404	0.0762066	NOT	46	92	90	22	400	66	123	413
CD53	58.7567	0.195112	0.391474	0.498404	0.618199	0.816403	NOT	40	65	43	30	136	40	45	129
CD59	68.7321	-0.181667	0.351612	-0.516669	0.605387	0.809804	NOT	48	71	63	56	87	64	80	79
TBC1D10C	121.598	2.22044	0.276703	8.02462	1.01838e-15	5.72185e-13	UP	40	37	37	28	407	179	142	363
LOC106507664	392.286	2.21577	0.325973	6.79739	1.06534e-11	2.20525e-09	UP	69	85	234	90	1047	950	369	1037
CD63	261.613	0.366912	0.207953	1.7644	0.077665	0.277793	NOT	186	190	193	183	477	372	223	454
CD68	28.5107	0.241362	0.564896	0.427268	0.669184	0.846434	NOT	42	20	5	17	41	40	20	63
CD72	12.4964	-0.104885	0.778666	-0.134698	0.89285	0.955706	NOT	3	14	2	22	26	15	7	16
CD74	3439.04	1.18613	0.248363	4.77579	1.79003e-06	8.15464e-05	NOT	1733	2085	1673	1358	10396	4242	2772	9395
CD81	202.742	0.7351	0.309731	2.37335	0.0176278	0.108003	NOT	133	119	73	169	374	358	160	436
LOC102158192	21.7462	2.21505	0.561814	3.94268	8.05775e-05	0.00187152	UP	5	10	5	5	52	59	18	58
CD83	15.6402	0.831697	0.550944	1.50959	0.131149	0.369933	NOT	13	6	6	12	33	25	15	31
P2RX5	22.161	2.21305	0.831542	2.66139	0.00778198	0.0616653	UP	18	0	9	0	67	61	18	44
CD86	108.796	-0.280636	0.255425	-1.0987	0.271897	0.54872	NOT	118	78	116	87	185	95	63	196
CD8A	46.4728	0.239542	0.433532	0.552536	0.580581	0.793573	NOT	15	23	50	56	83	36	42	114
CD9	106.292	0.0596435	0.330351	0.180546	0.856724	0.939053	NOT	46	113	94	87	190	143	72	163
CD93	33.5552	0.0303391	0.538872	0.0563011	0.955102	0.982155	NOT	44	23	10	30	33	64	26	40
CD96	21.6209	0.692572	0.940158	0.736655	0.461332	0.716124	NOT	1	32	20	0	64	6	18	70
CD99	407.017	0.427214	0.219769	1.94392	0.0519049	0.216328	NOT	259	207	466	247	778	522	336	851
SIDT2	212.528	2.20993	0.390157	5.66421	1.47704e-08	1.41687e-06	UP	29	53	128	49	542	568	146	620
CDA	16.5788	0.540668	0.759108	0.712242	0.476315	0.726131	NOT	2	3	14	27	42	7	15	49
CDADC1	73.347	0.518421	0.300333	1.72615	0.08432	0.289829	NOT	56	57	42	42	141	84	64	176
CST7	36.3453	2.20133	0.493738	4.45851	8.25316e-06	0.000290684	UP	5	4	25	11	110	60	54	85
CDC123	220.89	-0.121636	0.259373	-0.468961	0.639097	0.828455	NOT	146	175	194	246	433	201	123	420
CDC14A	72.8903	-0.245704	0.404222	-0.607844	0.543291	0.772138	NOT	69	66	43	78	69	121	55	74
CDC14B	86.73	0.338018	0.318016	1.06289	0.28783	0.563108	NOT	86	65	42	56	149	120	71	166
CDC16	103.233	0.0873403	0.349219	0.250101	0.802509	0.916459	NOT	38	73	106	116	140	107	116	167
ST6GALNAC4	621.762	2.19249	0.278454	7.87378	3.44071e-15	1.62388e-12	UP	162	208	271	103	1809	1302	570	1835
CDC25A	37.8155	-0.11542	0.475659	-0.242653	0.808275	0.918506	NOT	49	10	58	19	55	36	30	72
CDC25B	106.283	-0.151059	0.335504	-0.450245	0.652534	0.836916	NOT	92	43	138	108	181	65	98	193
CDC25C	12.6604	-0.475738	0.717854	-0.662722	0.507509	0.747391	NOT	7	5	33	7	19	8	14	11
SLC39A11	117.012	2.18924	0.339322	6.45182	1.10518e-10	1.78631e-08	UP	25	36	62	19	350	249	120	299
CDC27	93.9234	-0.0838802	0.358849	-0.233748	0.815181	0.920864	NOT	127	33	110	59	146	96	63	189
CDC34	342.722	0.922715	0.25267	3.65186	0.00026035	0.00468988	NOT	230	183	211	159	736	668	253	704
CDC37	330.437	-0.132933	0.233183	-0.57008	0.568623	0.786448	NOT	319	176	361	308	642	279	216	593
CDC37L1	78.9799	0.41101	0.269576	1.52465	0.127346	0.364515	NOT	61	50	59	54	128	86	84	171
CDC40	64.9897	0.420775	0.314382	1.33842	0.18076	0.442424	NOT	36	34	62	54	101	99	63	114
CDC42	691.996	-0.552695	0.212749	-2.59787	0.00938038	0.0710392	NOT	786	642	662	620	984	423	476	1149
CDC42BPA	109.672	-0.0580304	0.335825	-0.1728	0.862809	0.941684	NOT	132	48	126	72	120	133	108	172
CDC42BPB	436.14	-0.0254162	0.269926	-0.0941599	0.924982	0.968632	NOT	251	333	438	439	582	685	315	588
CDC42BPG	118.389	0.146749	0.298381	0.491816	0.622849	0.818778	NOT	119	77	113	67	246	125	62	268
CDC42EP1	310.891	0.279207	0.276802	1.00869	0.313124	0.58832	NOT	227	117	397	223	563	420	215	630
CDC42EP2	80.8804	-0.701712	0.309145	-2.26985	0.0232169	0.1302	NOT	83	73	66	107	105	48	48	135
CDC42EP3	84.988	-0.715429	0.318831	-2.24391	0.0248379	0.135342	NOT	87	57	102	106	86	74	73	80
CDC42EP4	617.81	0.861345	0.196206	4.39001	1.13345e-05	0.000374609	NOT	404	276	400	380	1182	1063	556	1359
CDC42EP5	341.184	0.230528	0.277948	0.829392	0.406883	0.671912	NOT	254	174	454	192	728	304	237	792
CDC42SE1	321.084	-0.075947	0.188476	-0.402954	0.686982	0.856478	NOT	313	210	302	272	472	316	248	628
CDC45	79.2221	-0.979639	0.310148	-3.15862	0.0015852	0.019066	NOT	69	62	93	126	100	47	45	91
CDC5L	134.476	-0.146745	0.256213	-0.572747	0.566816	0.786378	NOT	148	72	144	111	194	152	89	244
CDC6	19.4434	-1.30194	0.666183	-1.95433	0.0506622	0.212808	NOT	38	2	39	17	14	13	11	19
CDC7	28.848	-1.02943	0.447161	-2.30214	0.0213273	0.123373	NOT	33	23	51	25	40	11	13	43
CDC73	76.6749	0.0754207	0.306157	0.246346	0.805414	0.917355	NOT	84	33	73	61	129	75	66	147
CDCA2	36.4454	-1.19585	0.382729	-3.12454	0.00178086	0.0209495	NOT	52	28	47	43	31	20	16	54
CDCA3	73.2473	-1.08991	0.281126	-3.87693	0.000105782	0.0023461	NOT	87	67	108	71	79	43	45	76
CDCA4	59.2992	-0.866793	0.424295	-2.0429	0.0410622	0.189033	NOT	28	47	76	105	62	65	22	73
LOC100513844	14.4766	2.18121	0.873586	2.49685	0.0125303	0.0866618	UP	0	11	0	5	31	36	16	38
CDCA7	162.667	-0.67558	0.399353	-1.69168	0.0907062	0.301503	NOT	220	47	226	190	241	74	139	195
CDCA7L	41.343	-0.628322	0.491605	-1.2781	0.201213	0.469843	NOT	56	37	30	42	71	10	20	91
CDCA8	79.6144	-0.972406	0.307246	-3.16491	0.00155131	0.018754	NOT	96	47	118	95	84	51	54	87
CDCP1	33.16	0.244084	0.503477	0.484797	0.62782	0.822524	NOT	14	23	49	17	37	64	31	40
LOC100152327	16.505	2.17809	0.938122	2.32176	0.0202461	0.119393	UP	0	3	13	5	62	1	18	84
CDH11	19.555	-0.313845	0.622895	-0.503849	0.614368	0.813866	NOT	14	31	17	7	26	9	26	23
CDH17	809.29	0.725486	0.281168	2.58026	0.00987272	0.0738021	NOT	333	467	614	613	1463	1636	518	1682
DGCR2	407.894	2.17528	0.359152	6.05672	1.38924e-09	1.76254e-07	UP	56	116	225	105	1096	1101	310	1019
CDHR5	2337.32	0.668599	0.369389	1.81002	0.0702932	0.262133	NOT	856	1688	1438	1916	3765	5918	1202	3685
PFKFB3	240.946	2.17391	0.299436	7.26002	3.87035e-13	1.23422e-10	UP	78	30	95	93	567	546	253	711
CASP10	335.172	2.17377	0.246118	8.83224	1.02598e-18	8.64684e-16	UP	121	97	101	82	898	778	353	830
CDK1	68.4749	-0.96692	0.340637	-2.83856	0.00453169	0.0421351	NOT	102	41	96	67	75	34	40	102
CDK10	205.846	0.370019	0.293642	1.2601	0.207633	0.477865	NOT	96	131	232	145	313	319	218	289
CDK11B	216.156	-0.458499	0.232349	-1.97332	0.0484587	0.207612	NOT	166	198	309	166	305	211	137	304
CDK12	89.5247	0.132634	0.269549	0.492061	0.622676	0.818778	NOT	75	65	79	65	189	85	60	182
CDK13	143.277	0.108645	0.303555	0.35791	0.720411	0.874679	NOT	76	107	174	106	207	233	90	241
CDK14	24.479	-0.606131	0.548176	-1.10572	0.268847	0.545764	NOT	20	36	35	6	32	21	18	28
CDK16	512.369	0.347401	0.194632	1.78491	0.0742755	0.270979	NOT	314	342	493	357	927	657	364	1160
CDK17	35.5707	-0.0370274	0.40366	-0.0917292	0.926913	0.969343	NOT	30	30	31	27	42	54	32	43
CDK18	307.837	0.135356	0.338712	0.399619	0.689437	0.857351	NOT	110	165	381	339	477	464	258	418
CDK19	75.8129	-0.307444	0.339352	-0.905975	0.364949	0.633477	NOT	81	84	70	39	97	93	48	113
CDK2	56.555	-0.593806	0.397975	-1.49207	0.135681	0.377441	NOT	82	28	92	31	69	48	33	92
CDK20	12.7583	1.21421	0.892331	1.36071	0.173605	0.433516	NOT	2	0	21	5	34	35	7	16
CDK2AP1	145.635	-0.429517	0.309325	-1.38856	0.164967	0.421728	NOT	206	92	168	94	205	97	131	206
CDK2AP2	282.832	-0.0896062	0.202145	-0.443278	0.657565	0.840136	NOT	292	189	273	218	467	264	199	554
LOC102158125	24.0281	2.16817	0.728424	2.97652	0.00291541	0.0305497	UP	1	5	14	10	77	6	30	120
CDK4	185.912	-0.0345254	0.235886	-0.146365	0.883633	0.951135	NOT	180	141	151	149	333	143	148	373
CDK5	50.3224	0.2326	0.364312	0.638465	0.523171	0.75865	NOT	50	23	59	25	94	66	41	83
CDK5RAP1	16.2576	-0.642424	0.842364	-0.762644	0.445676	0.703572	NOT	9	1	20	38	22	22	1	27
CDK5RAP2	69.8121	-0.403215	0.368186	-1.09514	0.273455	0.54994	NOT	52	58	102	55	77	104	46	68
CDK5RAP3	254.132	0.366118	0.268901	1.36154	0.173344	0.433325	NOT	108	154	292	196	471	363	194	482
CDK6	133.564	-0.618012	0.257863	-2.39666	0.0165451	0.104121	NOT	101	135	141	157	182	108	66	221
CDK7	25.2752	0.176106	0.476575	0.369526	0.711736	0.869965	NOT	14	9	29	29	53	22	18	56
CDK8	52.7667	-0.0801504	0.319722	-0.250688	0.802055	0.916291	NOT	37	31	64	51	90	47	41	97
CDK9	173.221	-0.439768	0.206527	-2.12935	0.0332257	0.164719	NOT	164	142	192	164	234	142	137	249
CDKAL1	16.425	-0.874553	0.64638	-1.353	0.176055	0.436748	NOT	14	33	16	5	21	9	7	28
CDKN1A	248.06	-0.176501	0.305629	-0.577502	0.563601	0.784282	NOT	179	179	170	336	408	153	205	499
CDKN1B	133.343	-0.265165	0.241279	-1.099	0.27177	0.54872	NOT	125	89	136	135	154	142	96	243
CDKN1C	33.7041	-0.07995	0.705279	-0.113359	0.909746	0.962008	NOT	27	52	31	1	41	67	20	31
CDKN2AIP	54.7589	0.397398	0.334918	1.18656	0.235403	0.507959	NOT	40	21	58	41	85	63	58	117
CDKN2AIPNL	118.565	-0.350491	0.251328	-1.39456	0.163149	0.41948	NOT	141	100	107	90	160	113	86	186
CDKN2B	215.96	1.16164	0.257949	4.50338	6.68825e-06	0.000244318	NOT	140	95	135	75	505	235	239	648
CDKN2C	50.9561	-1.06306	0.394506	-2.69467	0.00704583	0.0579329	NOT	49	36	114	39	57	26	28	67
CDKN2D	69.5797	0.106615	0.342999	0.310831	0.755929	0.891621	NOT	41	33	103	53	103	69	61	151
LOC100522404	4835.41	2.16371	0.381321	5.67426	1.39292e-08	1.34714e-06	UP	529	1801	1717	1743	10006	15215	4360	10035
CDON	17.7144	-0.928632	0.775097	-1.19809	0.230884	0.503176	NOT	26	11	11	28	15	33	6	2
TCN1	41.6179	2.15906	0.450981	4.78747	1.68897e-06	7.84575e-05	UP	10	9	7	24	112	87	41	124
CDR2	313.66	0.99309	0.286641	3.46458	0.000531064	0.00816952	NOT	149	114	202	237	706	648	237	584
CDR2L	52.3216	-0.769866	0.403466	-1.90813	0.056374	0.227223	NOT	86	25	56	55	66	31	24	97
CDRT1	65.5406	1.83705	1.08898	1.68695	0.091613	0.302746	NOT	26	52	0	9	145	109	85	198
SMPD3	154.355	2.15752	0.369369	5.8411	5.1858e-09	5.77238e-07	UP	38	40	48	61	317	496	119	350
CDS2	66.2258	1.11927	0.308766	3.62498	0.00028898	0.00506864	NOT	33	33	45	28	126	124	62	162
CDT1	99.7148	-0.0679626	0.320534	-0.212029	0.832084	0.927254	NOT	57	47	135	109	164	87	79	193
CDV3	172.402	-0.217904	0.219035	-0.99484	0.319814	0.593969	NOT	179	135	184	119	272	160	127	286
CDX1	153.509	0.64952	0.32194	2.01752	0.0436411	0.195676	NOT	87	80	147	89	260	302	79	369
CDX2	1443.8	0.67298	0.20958	3.21108	0.00132237	0.0167051	NOT	931	719	1360	744	2705	2318	1132	3271
CDYL	76.9181	-0.0218049	0.345621	-0.063089	0.949696	0.97994	NOT	77	28	74	82	155	68	67	111
CDYL2	27.5362	-0.475941	0.480114	-0.991307	0.321536	0.595106	NOT	31	36	26	11	37	18	23	42
CHPF	47.2814	2.14957	0.453872	4.73606	2.17911e-06	9.59377e-05	UP	9	7	29	15	167	48	53	170
CEACAM18	776.55	0.18672	0.259274	0.720165	0.471423	0.723137	NOT	459	739	638	539	1288	1235	493	1304
CEBPA	472.485	0.833577	0.301787	2.76214	0.00574241	0.0503753	NOT	216	313	436	171	937	868	301	1161
CEBPB	90.9363	-0.937147	0.379775	-2.46764	0.0136007	0.0918572	NOT	125	63	55	148	83	51	64	126
CEBPD	970.076	0.104638	0.240744	0.434645	0.66382	0.843412	NOT	906	604	670	903	1921	699	900	1879
CEBPG	194.693	-0.0207831	0.238018	-0.0873173	0.930419	0.970403	NOT	113	151	183	203	331	201	137	371
CEBPZ	41.1291	-0.532557	0.409823	-1.29948	0.193779	0.459854	NOT	61	43	30	24	56	34	31	52
CEBPZOS	86.2825	-0.141301	0.374716	-0.377088	0.706108	0.867163	NOT	114	62	74	49	142	45	96	140
CELF1	374.68	0.0426311	0.179475	0.237532	0.812244	0.91982	NOT	304	270	398	260	610	426	307	642
CELF2	53.0899	-0.158242	0.438321	-0.361019	0.718085	0.873494	NOT	89	27	51	21	89	48	32	108
CELF3	17.3696	-0.816074	0.583865	-1.39771	0.1622	0.417961	NOT	12	7	25	31	16	20	10	17
CEND1	17.9563	-0.155518	0.588812	-0.264122	0.791686	0.911048	NOT	12	10	17	24	41	7	20	20
CENPA	63.6571	-0.891657	0.345003	-2.5845	0.00975217	0.0731971	NOT	50	54	125	53	80	41	40	73
CENPB	309.88	-0.185846	0.220423	-0.843134	0.399154	0.664543	NOT	350	223	268	251	492	345	182	541
CENPC	26.7293	-0.848744	0.838491	-1.01223	0.311429	0.586521	NOT	76	14	13	10	34	0	21	52
CENPE	40.0108	-1.05973	0.5654	-1.8743	0.0608889	0.238522	NOT	52	17	66	50	78	5	25	35
CENPF	52.8463	-1.0254	0.347281	-2.95267	0.0031504	0.0323748	NOT	43	58	84	52	57	24	32	74
CD6	36.4459	2.14145	0.665478	3.21792	0.00129125	0.0163964	UP	0	23	11	9	138	26	52	112
CENPI	12.4678	-0.480431	0.83184	-0.577552	0.563567	0.784282	NOT	16	3	26	6	31	1	12	12
PGAP3	45.0599	2.13741	0.490378	4.3587	1.30834e-05	0.000425266	UP	11	6	31	10	135	116	30	115
SREBF1	541.241	2.12715	0.373825	5.69024	1.26864e-08	1.24484e-06	UP	83	167	282	148	1208	1502	301	1768
AGPAT2	3733.73	2.12389	0.349433	6.07811	1.21608e-09	1.57676e-07	UP	477	1411	1623	1104	8511	10157	2795	10685
CENPN	33.4153	-0.792784	0.583331	-1.35906	0.174126	0.434267	NOT	48	13	21	58	37	7	33	49
CENPO	37.3682	-0.388414	0.509363	-0.762549	0.445733	0.703572	NOT	65	12	45	22	64	17	32	61
CENPQ	32.1821	-0.640001	0.418415	-1.52958	0.12612	0.362907	NOT	33	23	50	26	43	29	26	27
LOC110259106	96.3784	2.12298	0.548935	3.86745	0.000109979	0.0024075	UP	8	39	63	12	227	264	40	338
CENPU	12.1522	-0.610631	0.761543	-0.801834	0.422649	0.685059	NOT	9	7	17	16	9	2	20	12
CENPV	103.801	-0.049104	0.305107	-0.16094	0.872141	0.94664	NOT	53	63	125	115	187	88	82	192
CENPW	19.9074	-0.318486	0.709127	-0.449123	0.653343	0.837184	NOT	12	12	29	22	19	1	23	53
CENPX	432.459	0.27357	0.271775	1.0066	0.314125	0.588966	NOT	279	209	407	421	1041	313	394	829
CEP104	57.7161	-0.645553	0.38045	-1.69681	0.0897317	0.299843	NOT	33	37	96	73	63	48	48	66
CEP120	76.2497	-0.59664	0.312364	-1.91008	0.056123	0.226732	NOT	70	81	69	79	91	65	66	78
CEP128	12.3327	0.577521	0.831673	0.694409	0.487426	0.732909	NOT	12	6	9	6	35	0	17	29
CEP131	112.788	0.0263272	0.311192	0.0846009	0.932579	0.97144	NOT	104	113	90	57	172	142	103	154
CEP135	15.797	-0.540365	0.736206	-0.733985	0.462958	0.717609	NOT	17	2	37	10	21	11	19	9
PCDH1	120.632	2.12064	0.353986	5.99076	2.08861e-09	2.51465e-07	UP	36	33	45	36	282	365	99	254
CEP162	19.3739	-0.861171	0.651747	-1.32133	0.186392	0.450485	NOT	28	4	12	39	29	14	13	14
CEP164	54.6896	-0.841589	0.427741	-1.96752	0.0491235	0.209019	NOT	87	23	41	82	72	34	37	61
CEP170	27.5707	0.00199046	0.4376	0.00454859	0.996371	0.998486	NOT	18	14	36	25	35	36	27	39
CEP170B	226.619	0.300205	0.213979	1.40296	0.160627	0.41634	NOT	172	126	180	198	450	290	168	427
CEP19	16.8554	-0.0956165	0.807643	-0.11839	0.905759	0.960082	NOT	15	0	7	36	22	12	18	32
CDIP1	469.177	2.11907	0.26681	7.94224	1.98564e-15	1.01863e-12	UP	124	129	202	133	1205	1188	381	1272
CEP250	115.022	-0.423493	0.264259	-1.60257	0.10903	0.333238	NOT	82	91	172	100	149	100	78	196
CEP290	17.6204	-0.344956	0.625762	-0.551257	0.581457	0.793916	NOT	25	23	11	4	22	14	18	23
CEP295	89.0399	-0.66824	0.261636	-2.55408	0.0106469	0.0775283	NOT	80	86	124	75	102	74	54	134
CEP350	133.965	0.4473	0.232573	1.92326	0.0544468	0.222668	NOT	86	82	122	89	272	183	99	275
CEP41	19.2262	0.242612	0.538314	0.450688	0.652214	0.836871	NOT	20	11	17	11	30	35	7	41
LOC100524940	285.83	2.11688	0.439173	4.82015	1.43454e-06	6.79763e-05	UP	14	118	136	87	606	670	345	750
CEP55	20.9785	-0.982122	0.588281	-1.66948	0.0950225	0.309033	NOT	50	17	13	11	25	17	11	20
CEP57	56.7121	-0.765804	0.398032	-1.92398	0.0543576	0.222387	NOT	86	71	40	34	78	36	32	81
CEP63	50.8685	0.283529	0.539278	0.525756	0.599058	0.805599	NOT	33	6	40	76	76	80	55	58
CEP68	157.082	0.938195	0.262343	3.57622	0.000348602	0.00588434	NOT	92	80	84	100	337	224	112	476
CEP70	24.515	-0.463675	0.582726	-0.7957	0.426206	0.687398	NOT	26	4	33	34	38	15	26	23
CEP72	19.7062	-0.856431	0.496962	-1.72333	0.0848284	0.290722	NOT	26	16	16	26	30	12	8	28
CEP76	21.5098	0.54423	0.549816	0.989841	0.322252	0.595491	NOT	14	7	9	28	54	18	18	52
CEP78	16.6253	-0.638269	0.62704	-1.01791	0.308722	0.583284	NOT	27	7	15	19	33	4	10	27
CEP83	24.0345	-0.339983	0.46538	-0.730548	0.465055	0.718779	NOT	17	17	27	28	35	21	25	23
CEP85	19.5538	-0.976079	0.603301	-1.6179	0.105685	0.328177	NOT	20	37	15	10	12	23	10	20
CEP85L	20.3497	-0.570696	0.673818	-0.846958	0.397018	0.663411	NOT	28	2	37	18	15	28	7	38
CEP89	34.8715	-0.274031	0.49912	-0.549027	0.582987	0.794814	NOT	19	15	37	57	47	50	27	30
CEP95	129.302	-0.321717	0.25823	-1.24585	0.212818	0.48373	NOT	106	125	150	94	166	126	114	173
CEPT1	50.2054	-0.94951	0.371128	-2.55845	0.0105141	0.0769099	NOT	46	32	85	61	44	31	40	57
CERCAM	34.7349	0.13176	0.385955	0.341387	0.732812	0.879563	NOT	27	24	41	19	44	41	34	67
CERK	525.335	0.782944	0.27399	2.85756	0.00426905	0.0403578	NOT	241	372	399	263	1044	996	336	1170
CERS2	50.8702	-0.112969	0.487924	-0.23153	0.816903	0.921362	NOT	33	67	41	29	46	104	30	56
CERS4	41.6809	0.825537	0.581905	1.41868	0.155992	0.411022	NOT	27	45	18	5	53	73	65	53
CERS5	159.094	0.783102	0.325661	2.40465	0.0161879	0.102854	NOT	46	89	170	91	280	275	141	352
CERS6	37.4239	1.25465	0.706091	1.7769	0.0755842	0.273412	NOT	23	31	4	11	38	147	21	39
CES1	221.141	0.0832593	0.381802	0.218069	0.827375	0.925707	NOT	92	190	135	281	345	395	111	331
CES3	369.929	0.504123	0.389131	1.29551	0.195145	0.461888	NOT	86	395	339	179	671	645	269	672
CETN2	109.493	-0.289513	0.296252	-0.977251	0.328445	0.601197	NOT	119	63	96	122	168	76	102	164
CETN3	51.4627	0.0718989	0.449137	0.160082	0.872816	0.947176	NOT	53	17	31	65	65	55	66	66
CFAP126	21.8795	0.0346857	0.592657	0.0585258	0.95333	0.98153	NOT	21	3	21	28	33	24	27	22
CFAP20	43.6441	-0.382946	0.385839	-0.992501	0.320953	0.594819	NOT	34	41	40	47	68	22	43	63
CFAP36	35.1927	-0.810893	0.456922	-1.77469	0.0759499	0.274469	NOT	25	62	30	26	44	22	24	43
CFAP69	13.7084	-0.39812	0.672001	-0.59244	0.553556	0.77856	NOT	12	10	14	15	11	15	19	6
SLC13A2	95.3773	2.11573	0.496974	4.25722	2.06981e-05	0.000623004	UP	6	40	33	38	199	245	50	365
CFAP97	68.227	-0.169132	0.443155	-0.381654	0.702718	0.865307	NOT	82	67	76	14	106	51	61	120
CFB	1046.68	0.716755	0.34774	2.06118	0.0392856	0.184747	NOT	854	429	449	874	2982	697	740	3210
CFD	1921.54	0.258709	0.280568	0.92209	0.356482	0.626005	NOT	1493	1158	1781	1414	4726	1342	1061	5159
CFDP1	255.461	-0.389489	0.223195	-1.74506	0.0809748	0.284458	NOT	261	227	250	218	380	170	211	404
CFH	833.902	-0.398956	0.273074	-1.46098	0.14402	0.392084	NOT	956	777	695	681	1413	450	485	1748
CFI	338.247	-0.764821	0.341946	-2.23667	0.0253078	0.136787	NOT	315	291	403	409	541	102	157	674
CFL1	2420.04	-0.297884	0.210916	-1.41233	0.157851	0.4141	NOT	2156	2031	2260	2363	3889	1538	1714	4823
CFL2	124.538	-0.590717	0.344767	-1.71338	0.0866427	0.293697	NOT	144	127	108	109	157	106	122	87
CFLAR	192.627	0.149482	0.23108	0.646884	0.517707	0.754406	NOT	147	149	142	161	265	250	177	339
CFP	301.508	0.221991	0.249458	0.889893	0.373523	0.641981	NOT	225	142	275	293	660	275	216	648
CFTR	33.9061	0.469205	0.430321	1.09036	0.275554	0.551171	NOT	34	9	28	25	76	32	35	66
CGGBP1	309.117	-0.401151	0.229521	-1.74777	0.0805034	0.283625	NOT	259	304	353	247	378	234	282	464
CGN	293.837	-0.207437	0.338872	-0.612139	0.540446	0.770228	NOT	438	166	209	230	537	220	136	685
CGNL1	54.6041	-0.460301	0.319618	-1.44016	0.149823	0.401672	NOT	48	35	58	70	75	54	35	77
CGREF1	55.1239	1.14756	0.980643	1.17022	0.241914	0.515132	NOT	2	69	13	21	136	125	19	140
CGRRF1	26.9965	0.331725	0.580575	0.571373	0.567747	0.786378	NOT	16	32	27	3	58	31	28	36
CHAF1A	53.2106	-0.40436	0.334423	-1.20913	0.226613	0.498909	NOT	63	28	66	48	87	45	32	84
CHAF1B	22.031	-0.913123	0.565045	-1.61602	0.106091	0.328547	NOT	32	12	41	13	24	12	22	15
CHCHD1	81.2707	0.0674836	0.283542	0.238002	0.811879	0.919751	NOT	57	45	98	68	127	76	76	158
CHCHD10	597.586	0.706275	0.222684	3.17165	0.00151578	0.0185141	NOT	342	435	369	340	1364	788	441	1481
CHCHD2	711.788	-0.233814	0.167419	-1.39658	0.162541	0.418555	NOT	639	513	694	710	1109	609	531	1241
CHCHD3	188.336	-0.183347	0.250362	-0.732328	0.463968	0.718514	NOT	226	108	186	150	249	188	132	375
CHCHD4	67.8724	-0.10083	0.430417	-0.234262	0.814782	0.920864	NOT	85	28	89	38	131	29	57	148
CHCHD5	118.018	0.334893	0.281225	1.19084	0.233717	0.506173	NOT	113	61	113	63	189	171	109	202
CHCHD6	166.991	0.132198	0.28507	0.463738	0.642835	0.831068	NOT	89	103	216	133	297	191	97	383
CHCHD7	64.7103	0.0746338	0.375592	0.19871	0.84249	0.932428	NOT	58	47	87	21	104	83	49	111
CHD1	340.557	-0.755193	0.245604	-3.07484	0.00210619	0.0240571	NOT	328	341	504	256	324	326	235	381
CHD1L	104.01	-0.160311	0.381599	-0.420102	0.674411	0.849511	NOT	131	27	124	92	127	113	98	154
CHD2	157.526	-0.147005	0.247688	-0.593511	0.552839	0.778395	NOT	184	99	141	127	282	139	110	277
CHD3	479.269	0.0807509	0.225092	0.358746	0.719785	0.874278	NOT	445	432	350	294	788	583	368	846
CHD4	283.883	-0.0415753	0.189613	-0.219264	0.826444	0.925426	NOT	257	206	253	239	480	304	187	539
CHD5	31.4268	-0.747241	0.531709	-1.40536	0.159915	0.41634	NOT	29	23	46	34	19	52	19	18
CHD6	58.3195	-0.428002	0.387903	-1.10337	0.269865	0.546821	NOT	38	32	76	79	69	50	60	63
CHD7	129.927	-0.741211	0.325624	-2.27628	0.0228294	0.128734	NOT	113	59	177	202	172	90	84	167
CHD8	82.8183	-0.291527	0.337627	-0.86346	0.387885	0.655493	NOT	100	33	87	87	133	92	57	104
CHD9	53.2467	0.0970199	0.454688	0.213377	0.831033	0.92722	NOT	65	19	75	18	89	79	38	78
LOC100625498	23.8185	2.11371	0.630174	3.35417	0.000796039	0.011289	UP	1	8	11	10	63	50	10	101
CHEK2	58.296	-0.499638	0.474108	-1.05385	0.291953	0.565919	NOT	39	30	110	56	48	87	48	40
CHERP	53.998	-0.684146	0.314973	-2.17208	0.0298496	0.152466	NOT	61	56	60	43	80	39	31	72
CHFR	149.23	0.154848	0.25182	0.614918	0.538609	0.769097	NOT	128	103	131	107	238	220	90	289
CHGA	154.62	0.144317	0.284335	0.507559	0.611762	0.812401	NOT	130	76	144	143	264	108	137	382
CHI3L1	15.158	-2.04005	1.68762	-1.20883	0.226727	0.498909	NOT	6	15	0	57	19	0	1	19
CHIC1	13.8824	-0.342889	0.684148	-0.501192	0.616236	0.814948	NOT	6	26	11	6	21	7	14	21
CHIC2	36.7097	-0.16087	0.400429	-0.401745	0.687872	0.857043	NOT	33	28	23	43	76	29	27	54
CHID1	158.709	0.435419	0.265116	1.64238	0.100512	0.318835	NOT	69	112	140	127	325	222	125	292
CHKA	245.471	0.819742	0.296604	2.76376	0.00571397	0.0502504	NOT	100	136	192	164	441	516	163	520
CHKB	356.563	-0.24139	0.236313	-1.02148	0.307025	0.581824	NOT	250	323	361	341	490	460	258	443
CHM	31.3276	-0.857213	0.519671	-1.64953	0.099039	0.31634	NOT	45	20	28	41	29	7	23	64
CHML	13.2635	-0.867252	0.792353	-1.09453	0.273724	0.550247	NOT	11	22	10	12	16	0	8	31
SLC6A19	2098.55	2.11043	0.370955	5.68917	1.2766e-08	1.24484e-06	UP	293	850	1021	458	4304	6311	1861	4801
CHMP1B	294.059	0.11135	0.220745	0.504427	0.613961	0.813673	NOT	293	209	224	207	530	267	230	634
CHMP2A	502.919	-0.291366	0.175964	-1.65582	0.0977574	0.313893	NOT	396	450	511	473	804	443	348	821
CHMP2B	53.7982	-0.518445	0.399913	-1.29639	0.19484	0.461576	NOT	81	38	37	53	61	44	24	120
CHMP3	257.474	0.183341	0.193074	0.949592	0.34232	0.612996	NOT	207	164	227	205	464	257	200	565
CHMP4A	67.8616	0.00690203	0.35208	0.0196036	0.98436	0.994057	NOT	49	27	96	60	115	91	48	100
CHMP4B	456.441	0.118223	0.224871	0.525735	0.599072	0.805599	NOT	290	253	501	431	799	394	398	964
CHMP4C	94.4612	1.05309	0.362234	2.90721	0.00364673	0.0359913	NOT	82	45	40	34	176	167	126	153
CHMP5	253.727	-0.668578	0.223864	-2.98654	0.00282153	0.0298353	NOT	232	260	249	282	323	158	173	391
CHMP6	544.105	0.686198	0.225217	3.04683	0.00231265	0.0258644	NOT	256	252	498	400	1003	857	523	1078
CHMP7	213.982	-0.281251	0.271197	-1.03707	0.299702	0.575131	NOT	256	160	169	188	258	291	131	313
CHN1	12.1688	-0.0771571	0.852854	-0.0904693	0.927914	0.969724	NOT	18	8	16	0	7	23	11	14
CHN2	33.1362	0.452844	0.528568	0.856737	0.39159	0.658709	NOT	17	26	46	6	85	24	33	66
CHORDC1	52.8567	-0.090927	0.393669	-0.230973	0.817336	0.921524	NOT	67	26	48	41	97	31	57	80
CHP1	250.001	0.0637397	0.267713	0.23809	0.811811	0.919751	NOT	252	159	143	248	454	218	196	520
CHP2	669.791	0.376031	0.241626	1.55625	0.119648	0.351313	NOT	594	378	460	498	1517	549	518	1658
ZC3H12D	32.372	2.11024	0.55092	3.8304	0.000127936	0.00270522	UP	10	18	6	5	105	25	39	130
CHPT1	52.8744	-0.00202428	0.482592	-0.0041946	0.996653	0.9986	NOT	24	18	39	96	93	62	28	108
CHRAC1	139.689	-0.664934	0.272163	-2.44315	0.0145596	0.0962403	NOT	105	126	137	197	150	119	81	225
PPP1R1A	274.19	2.11014	0.409846	5.14863	2.62403e-07	1.59592e-05	UP	45	74	129	99	607	898	133	704
CHRDL1	49.0677	-0.215871	0.533179	-0.404876	0.685569	0.8558	NOT	40	64	17	45	35	75	53	41
CHRM3	22.7155	-0.217674	0.490164	-0.444084	0.656981	0.839658	NOT	18	26	24	12	38	13	23	35
CHRNB1	35.5832	0.408088	0.470797	0.866801	0.386051	0.653952	NOT	24	33	36	8	57	31	43	79
CHST10	43.7028	-0.437065	0.369622	-1.18247	0.237021	0.510051	NOT	46	25	42	54	61	32	40	56
CHST11	19.472	0.684517	0.759213	0.901615	0.367262	0.635942	NOT	30	9	0	9	39	31	13	47
CHST15	27.8418	0.196801	0.578952	0.339927	0.733911	0.880215	NOT	50	6	17	14	63	20	23	58
HHAT	14.9604	2.10689	0.882939	2.38622	0.0170226	0.105733	UP	2	0	13	5	24	59	17	10
CHST3	15.6	-0.245713	0.851127	-0.288692	0.772817	0.900827	NOT	23	11	23	0	13	23	19	7
CHST4	20.9613	-0.455447	0.81801	-0.556775	0.577681	0.791893	NOT	13	15	58	0	36	7	18	35
CHSY1	15.9569	-0.609298	0.683286	-0.891718	0.372544	0.641139	NOT	2	12	36	17	25	15	6	24
CHTF18	81.4366	-0.999063	0.42693	-2.34011	0.019278	0.115626	NOT	24	80	152	111	82	48	54	97
CHTF8	211.352	0.116656	0.228116	0.511388	0.609079	0.811121	NOT	196	134	189	157	392	181	158	481
CHTOP	306.991	-0.432381	0.213545	-2.02477	0.0428907	0.193895	NOT	244	274	419	243	404	256	241	454
CHUK	26.0932	-0.338802	0.570458	-0.593912	0.552571	0.77811	NOT	26	28	19	22	54	4	20	53
CHURC1	213.921	-0.0822325	0.218209	-0.376852	0.706283	0.867163	NOT	217	170	201	141	372	217	147	380
CIAO1	118.652	-0.191449	0.29619	-0.646375	0.518037	0.754607	NOT	151	88	81	95	171	92	103	218
CIAPIN1	91.8377	-0.183311	0.26669	-0.687357	0.491858	0.735077	NOT	99	65	95	67	130	85	63	187
CIART	13.4765	0.743242	0.844415	0.880186	0.378759	0.647396	NOT	1	17	1	12	16	30	12	25
CIB1	624.662	0.254893	0.224941	1.13316	0.257149	0.532298	NOT	400	341	532	628	1206	623	451	1475
CIB2	33.9638	-0.360579	0.483681	-0.745489	0.455976	0.711084	NOT	35	16	19	56	43	44	16	55
CIC	266.998	0.244888	0.246803	0.992244	0.321078	0.594819	NOT	187	126	284	229	464	396	184	481
CIDEB	147.315	0.466499	0.311641	1.49691	0.134416	0.375961	NOT	55	113	109	130	280	205	94	357
CIDEC	159.413	1.19431	0.365663	3.26614	0.00109025	0.014357	NOT	84	108	80	44	383	295	82	484
CIITA	34.164	0.332272	0.57494	0.577924	0.563316	0.784255	NOT	42	37	9	8	88	38	22	61
CILP	14.0437	-1.36648	0.702897	-1.94407	0.0518871	0.216328	NOT	5	29	12	18	15	12	6	6
CINP	159.09	0.10293	0.250388	0.41108	0.681014	0.853139	NOT	115	143	159	91	300	167	112	314
CIPC	62.7642	0.493443	0.364422	1.35404	0.175723	0.436748	NOT	31	63	47	29	140	84	44	129
CIR1	610.548	0.191382	0.230667	0.829687	0.406716	0.67173	NOT	420	473	576	421	928	987	414	1040
CIRBP	284.784	-0.0475037	0.2189	-0.217011	0.8282	0.92597	NOT	189	231	293	247	403	367	228	430
CISD1	254.164	-0.0910808	0.264664	-0.344137	0.730743	0.878969	NOT	241	224	226	173	389	176	183	625
CISD2	45.4052	0.172061	0.345357	0.49821	0.618336	0.816403	NOT	30	26	46	41	69	68	33	80
CD320	32.8558	2.10492	0.462542	4.55078	5.34481e-06	0.00020609	UP	8	9	17	8	120	40	30	115
CISH	73.354	-0.866407	0.390553	-2.21841	0.0265268	0.141118	NOT	112	58	83	63	116	22	40	116
CIT	32.2042	-0.954294	0.484377	-1.97015	0.0488213	0.20856	NOT	37	12	54	42	42	17	26	25
CITED2	87.1092	-0.196722	0.28517	-0.68984	0.490295	0.733856	NOT	106	58	88	58	122	95	65	141
CITED4	288.276	0.544404	0.428814	1.26956	0.204242	0.473634	NOT	159	164	343	132	483	600	66	758
CIZ1	169.511	-0.309958	0.284119	-1.09094	0.275298	0.551171	NOT	158	154	117	184	306	115	102	321
CKAP2	36.0696	-0.518502	0.38582	-1.34389	0.178982	0.440236	NOT	38	25	54	27	50	22	25	64
CKAP2L	52.3712	-0.597576	0.476394	-1.25437	0.209707	0.480544	NOT	43	23	71	76	61	22	65	50
CKAP4	23.3032	-1.07667	0.493951	-2.1797	0.0292796	0.150139	NOT	28	34	27	14	26	22	10	19
CKAP5	141.418	-0.810846	0.268165	-3.02368	0.00249723	0.0273329	NOT	205	96	189	116	170	99	81	199
CKB	1301.99	0.35058	0.188699	1.85788	0.0631859	0.243956	NOT	892	896	943	1041	2723	1415	940	2951
CKM	176.779	-0.871278	0.434834	-2.0037	0.045102	0.19931	NOT	244	92	179	247	170	128	187	72
CKMT1A	1367.18	0.0407021	0.212771	0.191296	0.848294	0.934898	NOT	1209	1005	1214	1037	2742	1082	904	3055
CKS1B	59.0484	-0.270336	0.359692	-0.751576	0.452306	0.708451	NOT	47	36	54	78	123	57	36	70
CKS2	108.636	-0.434825	0.350625	-1.24014	0.214923	0.486079	NOT	96	91	136	94	186	39	102	162
CLASP1	88.1665	0.0693354	0.316583	0.219012	0.826641	0.925474	NOT	102	40	94	54	142	104	80	136
CLASP2	74.42	-0.468623	0.369499	-1.26827	0.204702	0.474235	NOT	47	88	50	94	124	45	54	112
CLASRP	137.124	-0.36272	0.253268	-1.43216	0.152098	0.405189	NOT	100	138	162	110	181	134	112	183
CLCA1	123.403	0.169356	0.403744	0.419465	0.674877	0.849605	NOT	41	131	69	133	249	110	70	317
CLCA4	1595.05	1.7236	1.25925	1.36875	0.171077	0.43047	NOT	113	1169	231	788	543	8908	597	487
CLCC1	47.3774	0.545821	0.390304	1.39845	0.161978	0.417927	NOT	36	19	49	26	66	49	69	94
CLCN2	136.999	1.17872	0.35154	3.35301	0.000799372	0.0113227	NOT	31	72	93	83	236	307	121	310
CLCN3	90.378	0.5952	0.353007	1.68609	0.0917793	0.302995	NOT	33	36	104	73	154	151	74	189
CLCN7	142.173	0.551552	0.325869	1.69256	0.0905396	0.301225	NOT	61	104	91	121	220	270	129	221
CLDN12	17.4642	0.444286	0.671992	0.661148	0.508517	0.748029	NOT	5	16	3	23	24	16	17	52
CLDN15	665.367	0.501554	0.252596	1.9856	0.0470783	0.20428	NOT	340	344	807	388	1397	953	498	1318
LOC106504812	175.569	2.10294	1.00629	2.0898	0.0366362	0.176437	UP	4	73	139	12	498	465	64	564
CLDN3	405.2	0.942981	0.189896	4.96578	6.84256e-07	3.65534e-05	NOT	183	215	287	238	890	551	378	1057
TMEM154	12.3234	2.09946	0.712537	2.94645	0.00321444	0.0328089	UP	2	2	9	3	39	25	18	18
CLDN7	581.266	0.724606	0.300015	2.41523	0.0157252	0.101278	NOT	250	363	376	454	1142	1230	365	1027
CLDND1	72.4769	0.433987	0.326326	1.32992	0.183545	0.446525	NOT	46	44	83	35	116	119	59	136
CLEC14A	25.245	-0.654058	0.497485	-1.31473	0.188601	0.452849	NOT	16	41	19	23	31	19	12	46
CLEC16A	140.966	0.628979	0.277782	2.26429	0.0235562	0.131165	NOT	96	114	93	59	304	194	120	292
CLEC2B	24.7598	-1.19469	0.451061	-2.64863	0.00808193	0.0634456	NOT	23	21	31	40	32	17	9	23
PIGV	20.0542	2.09328	0.645945	3.24064	0.00119262	0.0154295	UP	9	0	8	9	48	51	13	65
CLEC3B	80.1315	0.389807	0.346914	1.12364	0.261165	0.537032	NOT	63	25	89	60	145	129	53	155
CLIC1	426.566	-0.794261	0.227291	-3.49447	0.000475009	0.00751291	NOT	480	338	402	567	512	270	299	543
CLIC2	84.102	-0.497059	0.257036	-1.93381	0.0531365	0.219604	NOT	77	69	106	77	127	66	58	118
CLIC4	223.783	-0.50817	0.235463	-2.15817	0.0309143	0.156213	NOT	223	204	241	202	298	131	167	398
CLIC5	664.19	0.125783	0.204627	0.614693	0.538757	0.769216	NOT	595	515	439	530	1200	775	470	1274
CLINT1	577.064	-0.262565	0.297939	-0.881273	0.37817	0.64698	NOT	708	244	677	502	732	408	603	907
CLIP1	52.4266	0.468778	0.337611	1.38851	0.164981	0.421728	NOT	41	33	35	36	94	43	59	127
CLIP2	78.8047	-0.321261	0.369869	-0.868581	0.385076	0.652991	NOT	97	61	95	41	133	48	40	183
CLIP3	33.9996	0.0248708	0.530002	0.0469258	0.962572	0.984811	NOT	25	13	60	19	75	21	43	32
CLK1	62.9972	-0.624098	0.389348	-1.60293	0.10895	0.333203	NOT	33	65	87	69	66	85	34	63
CLK2	136.819	-0.371264	0.243883	-1.5223	0.127933	0.365301	NOT	92	116	176	132	192	112	102	225
CLK3	204.195	-0.437112	0.223196	-1.95842	0.0501809	0.211837	NOT	182	191	226	179	285	232	111	286
CLK4	63.9934	-0.414101	0.41985	-0.986307	0.323982	0.597008	NOT	40	31	120	61	76	63	65	59
CLMN	76.0905	-0.929497	0.422635	-2.19929	0.0278572	0.145694	NOT	41	144	90	46	86	50	41	103
CLMP	82.446	-0.533594	0.390388	-1.36683	0.171679	0.431079	NOT	83	88	57	87	86	98	74	57
CLN3	59.5386	0.613829	0.39416	1.55731	0.119397	0.350788	NOT	29	53	48	25	163	78	32	131
CLN5	64.6504	0.898404	0.390026	2.30345	0.0212538	0.12323	NOT	32	29	28	59	117	136	63	102
CLN6	88.296	0.913489	0.288329	3.16822	0.00153378	0.0186184	NOT	35	58	66	44	191	134	79	211
CLN8	73.1358	0.723334	0.294416	2.45685	0.0140163	0.0937519	NOT	46	37	67	36	170	100	57	168
CLNK	17.4317	-0.14617	0.583864	-0.250349	0.802318	0.916459	NOT	24	16	8	11	24	9	20	32
CLNS1A	168.509	-0.225771	0.220383	-1.02445	0.305622	0.580468	NOT	173	118	186	131	269	147	113	313
CLP1	19.934	-0.729981	0.567982	-1.28522	0.198716	0.466319	NOT	25	23	17	16	32	4	17	27
CLPB	94.9745	0.150455	0.358726	0.419414	0.674913	0.849605	NOT	88	63	123	31	193	79	80	190
CLPP	47.7639	-0.692303	0.485169	-1.42693	0.1536	0.407447	NOT	90	39	32	33	95	35	12	69
CLPTM1	225.248	0.755402	0.289915	2.6056	0.00917135	0.0697247	NOT	115	98	166	182	445	419	134	527
CLPTM1L	473.689	0.682801	0.259205	2.63421	0.00843336	0.0655934	NOT	207	242	493	290	819	819	371	1062
CLPX	104.162	-0.289165	0.274292	-1.05422	0.291781	0.565865	NOT	132	75	85	86	138	107	76	168
SLC27A4	3802.44	2.08969	0.345553	6.04739	1.47209e-09	1.84778e-07	UP	497	1164	2285	977	8886	9683	3417	10268
ADH4	19.1973	2.08786	0.709271	2.94367	0.00324347	0.0329567	UP	3	2	10	10	39	70	7	46
CLSTN1	64.8199	0.151974	0.345073	0.440411	0.659639	0.841233	NOT	46	37	61	62	107	91	29	151
CLSTN3	13.0886	0.00897454	0.643512	0.0139462	0.988873	0.996081	NOT	10	7	12	14	8	19	17	16
CLTA	591.632	-0.11962	0.217399	-0.550232	0.58216	0.794388	NOT	581	424	617	433	978	411	480	1212
CLTB	364.933	0.689768	0.203191	3.39468	0.000687092	0.0100833	NOT	290	188	263	189	748	495	312	865
CLTC	554.131	-0.723776	0.361955	-1.99963	0.0455402	0.200419	NOT	1104	359	428	390	780	289	264	1055
CLU	184.176	-0.1736	0.316756	-0.548056	0.583653	0.795022	NOT	142	134	169	200	238	154	233	195
CLUH	229.525	-0.246549	0.359693	-0.685443	0.493064	0.735445	NOT	192	87	372	210	364	275	81	457
CLYBL	20.2262	-0.325125	0.533758	-0.609124	0.542442	0.771396	NOT	19	14	33	11	31	27	6	35
CMAH	47.9962	-0.145546	0.447725	-0.325079	0.745121	0.886504	NOT	40	55	30	37	70	20	59	83
CMAS	185.193	-0.326447	0.25097	-1.30074	0.193347	0.459278	NOT	171	126	190	201	258	143	108	407
CMBL	103.813	-0.349982	0.385202	-0.908567	0.363579	0.631912	NOT	185	54	67	79	176	84	57	189
CMC1	31.4836	0.00650184	0.608501	0.010685	0.991475	0.996797	NOT	44	10	51	4	62	27	31	43
CMC2	122.792	-0.183315	0.276304	-0.663455	0.507039	0.747064	NOT	93	91	94	152	197	99	95	225
CMIP	436.054	0.540874	0.24048	2.24914	0.0245037	0.134662	NOT	346	238	349	252	790	728	273	988
CMPK1	700.495	0.128043	0.201696	0.634834	0.525537	0.759903	NOT	525	518	535	627	1296	619	532	1570
CMPK2	152.776	-0.641873	0.313041	-2.05044	0.0403211	0.186867	NOT	204	99	204	119	117	133	133	205
CMSS1	25.0789	0.0384446	0.503856	0.0763008	0.93918	0.975449	NOT	18	26	30	8	45	16	26	47
CMTM3	107.303	1.07931	0.383491	2.81445	0.00488612	0.0443813	NOT	39	44	104	48	201	270	73	202
CMTM4	12.8243	-0.227065	0.81653	-0.278086	0.780946	0.905065	NOT	22	4	13	8	21	22	0	24
CMTM6	69.5651	0.306014	0.349512	0.875546	0.381277	0.649355	NOT	35	56	47	65	95	116	61	113
CMTM7	49.6658	0.523958	0.442151	1.18502	0.236009	0.508338	NOT	23	23	30	59	87	100	26	96
CMTR1	63.7786	0.086011	0.439369	0.19576	0.844798	0.933749	NOT	17	39	65	86	88	101	40	113
CMTR2	20.069	0.566448	0.601866	0.941154	0.346626	0.616289	NOT	13	3	30	11	29	23	14	70
CNBP	956.9	-0.220439	0.215977	-1.02066	0.307417	0.582202	NOT	926	722	1081	710	1670	647	836	1518
CNDP1	111.568	0.194032	0.482297	0.402309	0.687457	0.856798	NOT	13	95	115	122	167	191	75	177
CNDP2	1791.77	0.290103	0.204024	1.42191	0.155053	0.409736	NOT	1345	1058	1328	1608	3136	2675	1274	3277
CNEP1R1	52.1895	-0.157577	0.394763	-0.399168	0.689769	0.857351	NOT	67	31	38	45	59	68	52	58
CNIH1	142.843	0.452825	0.215719	2.09915	0.0358039	0.174206	NOT	93	87	110	110	264	189	124	293
CNIH2	266.505	1.04531	0.212738	4.9136	8.94192e-07	4.56735e-05	NOT	148	115	171	147	642	391	212	727
CNIH4	39.0488	-0.216482	0.38723	-0.559053	0.576125	0.791047	NOT	31	19	47	45	46	44	24	80
CNKSR1	54.5378	0.395585	0.370936	1.06645	0.286221	0.562104	NOT	50	25	57	28	109	70	29	140
CNKSR3	40.573	-1.10835	0.402475	-2.75384	0.00589001	0.0513645	NOT	42	30	80	37	34	19	28	53
CNN1	1356.89	-0.662247	0.385261	-1.71896	0.0856225	0.291601	NOT	1571	1019	1090	1793	1143	1297	1506	669
CNN2	335.092	0.139105	0.25218	0.55161	0.581216	0.793907	NOT	274	289	292	196	744	262	253	683
CNN3	255.746	-0.622535	0.256695	-2.4252	0.0153	0.0995178	NOT	224	273	370	167	277	192	181	407
CNNM1	39.2954	-0.659062	0.408152	-1.61474	0.106366	0.329021	NOT	27	56	46	28	60	33	24	42
CNNM3	49.3977	0.166759	0.460496	0.362129	0.717256	0.872902	NOT	27	41	20	62	64	92	31	78
RGN	23.0537	2.08562	0.55186	3.77925	0.0001573	0.00316721	UP	3	11	11	4	51	57	26	56
CNOT1	274.825	0.028272	0.208755	0.135431	0.892271	0.955432	NOT	235	193	317	168	455	301	211	504
CNOT10	38.8709	-0.540248	0.403663	-1.33836	0.180778	0.442424	NOT	28	29	48	50	48	30	16	86
CNOT11	47.3541	-0.459367	0.428072	-1.07311	0.283223	0.559538	NOT	62	42	54	25	67	51	13	95
CNOT2	147.409	-1.19503	0.297872	-4.0119	6.02323e-05	0.00150468	NOT	231	102	233	128	159	66	78	180
CNOT3	126.8	-0.442815	0.248576	-1.78141	0.0748457	0.271725	NOT	144	87	137	120	166	93	87	234
CNOT4	65.1752	-0.216464	0.34068	-0.635388	0.525175	0.759903	NOT	49	35	102	53	96	61	61	88
CNOT6	119.576	-0.43057	0.359845	-1.19654	0.231485	0.503835	NOT	123	69	223	58	147	112	102	151
CNOT6L	144.458	-0.0985324	0.312178	-0.31563	0.752284	0.888775	NOT	208	76	104	107	216	167	110	232
CNOT7	99.7877	-0.253603	0.419826	-0.604067	0.545799	0.77394	NOT	115	113	73	51	204	35	77	194
CNOT8	82.5503	-0.249517	0.334423	-0.746113	0.455599	0.710972	NOT	82	38	99	84	132	50	79	134
CNOT9	75.1753	-0.202284	0.30099	-0.672063	0.501543	0.742033	NOT	52	47	104	70	117	78	44	141
CNP	200.93	0.104761	0.275446	0.380333	0.703698	0.865611	NOT	231	107	187	123	330	163	199	406
CNPPD1	52.0663	-0.405407	0.327661	-1.23728	0.215985	0.48711	NOT	50	41	59	48	73	31	39	100
CNPY2	146.719	-0.226196	0.282575	-0.80048	0.423433	0.685616	NOT	100	102	174	154	201	208	90	194
CNPY3	126.054	0.983861	0.24954	3.9427	8.0568e-05	0.00187152	NOT	55	55	86	87	301	178	116	306
CNRIP1	49.0227	-0.751432	0.443918	-1.69273	0.0905073	0.301225	NOT	38	78	30	49	43	56	32	48
CNST	69.7492	-0.19939	0.314192	-0.634613	0.525681	0.759957	NOT	47	48	99	58	123	61	59	95
CNTLN	15.848	-0.557651	0.678975	-0.821313	0.411468	0.676171	NOT	16	7	32	10	10	26	13	9
CNTN4	15.5952	-0.521904	0.789737	-0.660858	0.508703	0.748076	NOT	20	21	6	11	1	19	16	23
CNTNAP1	36.7078	0.459976	0.443998	1.03599	0.300209	0.575681	NOT	36	17	15	33	76	47	42	47
CNTRL	26.7554	-0.486556	0.550176	-0.884365	0.376499	0.644749	NOT	33	11	34	27	23	37	26	15
CNTROB	20.6236	-0.854626	0.54352	-1.57239	0.11586	0.345297	NOT	39	8	26	17	32	15	10	22
COASY	259.265	-0.527199	0.22866	-2.30561	0.0211327	0.12283	NOT	179	212	383	257	356	215	177	369
COBL	468.632	1.09805	0.261012	4.20688	2.5892e-05	0.000752461	NOT	196	239	347	215	860	1019	402	1001
COBLL1	89.7693	-0.299343	0.289665	-1.03341	0.301412	0.577144	NOT	97	63	116	58	139	72	57	173
COG1	144.723	-0.380992	0.248125	-1.53548	0.124665	0.360568	NOT	101	156	145	135	206	122	108	224
[truncated: 9,800 more rows]
