# Supplementary material for: The Metabolic Pathway of Bile Secretion Is Vulnerable to Salmonella enterica Exposure in Porcine Intestinal Epithelial Cells
Source: Animals (Basel). 2024 Mar 3;14(5):789. doi: 10.3390/ani14050789 (PMC10931422; doi:10.3390/ani14050789)
Supplement: Supplementary file 1 [file animals-14-00789-s001.zip › Table S3. GO term enrichment in up- and down-regulated genes between Salmonella enterica infection group and control group.xlsx]

## Sheet: Up-regulated genes enriched
ID	Description	GeneRatio	BgRatio	pvalue	p.adjust	qvalue	geneID	Count	Ont
GO:0044255	cellular lipid metabolic process	34/253	365/6899	3.66424e-07	3.66424e-07	0.00072822	CYP1A1/BCO1/ABHD2/MFSD2A/LPGAT1/ENPP7/SMPD3/PGAP3/SREBF1/AGPAT2/PIGV/CDS1/P2RX7/APOC3/RETSAT/ORMDL3/ELOVL1/CDIPT/PISD/UGCG/LRAT/SERINC2/B3GALT4/KDSR/PPARG/DGAT1/GPAT3/GAL3ST1/EPHX1/PTGES/GIP/ABHD3/SGMS2/MBOAT7	34	BP
GO:0048878	chemical homeostasis	29/253	325/6899	6.75516e-06	6.75516e-06	0.00450281	PDX1/GPER1/CYBRD1/AQP7/SCT/STIM1/TSKU/SLC40A1/SLC35G1/ATP2B1/CLDN4/SIDT2/VDR/FRRS1/ANGPTL4/C2CD2L/P2RX7/APOC3/ORMDL3/UGCG/EDN3/LRRC8A/SLC11A2/ATP7A/SFTPD/HYAL2/SLC9A2/MYLIP/ATP6V0A1	29	BP
GO:0008610	lipid biosynthetic process	25/253	257/6899	6.79715e-06	6.79715e-06	0.00450281	GPER1/ABHD2/MFSD2A/PGAP3/SREBF1/AGPAT2/PIGV/CDS1/P2RX7/APOC3/ORMDL3/ELOVL1/CDIPT/PISD/UGCG/B3GALT4/KDSR/PPARG/DGAT1/GPAT3/GAL3ST1/PTGES/GIP/SGMS2/MBOAT7	25	BP
GO:0046486	glycerolipid metabolic process	17/253	140/6899	1.24934e-05	1.24934e-05	0.00620723	ABHD2/MFSD2A/LPGAT1/PGAP3/SREBF1/AGPAT2/PIGV/CDS1/APOC3/CDIPT/PISD/SERINC2/DGAT1/GPAT3/GAL3ST1/ABHD3/MBOAT7	17	BP
GO:0008643	carbohydrate transport	9/253	43/6899	1.96554e-05	1.96554e-05	0.0078125	SLC2A8/AQP7/MFSD2A/SLC2A6/SLC35A4/SLC5A1/ZDHHC7/MFSD12/AQP10	9	BP
GO:0006643	membrane lipid metabolic process	12/253	81/6899	3.38615e-05	3.38615e-05	0.00985732	ENPP7/SMPD3/PGAP3/PIGV/P2RX7/ORMDL3/UGCG/SERINC2/B3GALT4/KDSR/GAL3ST1/SGMS2	12	BP
GO:0006665	sphingolipid metabolic process	10/253	57/6899	3.47199e-05	3.47199e-05	0.00985732	ENPP7/SMPD3/P2RX7/ORMDL3/UGCG/SERINC2/B3GALT4/KDSR/GAL3ST1/SGMS2	10	BP
GO:0042592	homeostatic process	36/253	497/6899	5.41626e-05	5.41626e-05	0.0134551	PDX1/GPER1/CYBRD1/AQP7/SCT/STIM1/TSKU/MFSD2A/SLC40A1/SLC35G1/ATP2B1/CLDN4/SIDT2/VDR/FRRS1/ANGPTL4/C2CD2L/GPR55/P2RX7/APOC3/ORMDL3/PIK3CD/UGCG/EDN3/LRRC8A/SLC11A2/SASH3/JAK3/SH2B3/ATP7A/SFTPD/PTGES/HYAL2/SLC9A2/MYLIP/ATP6V0A1	36	BP
GO:0006644	phospholipid metabolic process	16/253	146/6899	8.04542e-05	8.04542e-05	0.0177658	MFSD2A/LPGAT1/ENPP7/SMPD3/PGAP3/AGPAT2/PIGV/CDS1/ORMDL3/CDIPT/PISD/SERINC2/GPAT3/ABHD3/SGMS2/MBOAT7	16	BP
GO:0045017	glycerolipid biosynthetic process	11/253	76/6899	8.97439e-05	8.97439e-05	0.0178354	MFSD2A/PGAP3/SREBF1/AGPAT2/PIGV/CDS1/CDIPT/PISD/DGAT1/GPAT3/MBOAT7	11	BP
GO:0030001	metal ion transport	21/253	236/6899	0.000139759	0.000139759	0.0239122	KCNE1/SLC5A10/GPER1/STIM1/SLC35G1/ATP2B1/SLC5A4/SLC13A2/VDR/ATP1B3/SLC30A10/P2RX7/KCNK5/KCNG1/SLC5A1/KCNJ13/CD84/TCN2/SPINK1/ATP7A/SLC5A12	21	BP
GO:0016485	protein processing	10/253	67/6899	0.000144385	0.000144385	0.0239122	TLL2/DMBT1/CTSZ/P2RX7/FURIN/PISD/GGT1/IHH/RCE1/CPE	10	BP
GO:0050714	positive regulation of protein secretion	7/253	37/6899	0.0003289	0.0003289	0.0502805	PDX1/GPER1/C2CD2L/F2RL1/P2RX7/LRRC8A/PPARG	7	BP
GO:0046467	membrane lipid biosynthetic process	9/253	62/6899	0.000384626	0.000384626	0.0545995	PGAP3/PIGV/P2RX7/ORMDL3/UGCG/B3GALT4/KDSR/GAL3ST1/SGMS2	9	BP
GO:0006811	ion transport	29/253	409/6899	0.000436786	0.000436786	0.0578704	SLC16A9/KCNE1/SLC5A10/GPER1/STIM1/SLC35G1/ATP2B1/SLC5A4/SLC13A2/VDR/SLC43A2/SLC52A2/ATP1B3/SLC30A10/P2RX7/KCNK5/KCNG1/SLC5A1/LRRC8A/SLC37A2/KCNJ13/LRRC8B/CD84/TCN2/SPINK1/ATP7A/PTGES/OSTM1/SLC5A12	29	BP
GO:0055082	cellular chemical homeostasis	18/253	205/6899	0.000494443	0.000494443	0.0608253	PDX1/GPER1/CYBRD1/SCT/STIM1/SLC40A1/SLC35G1/ATP2B1/SIDT2/VDR/FRRS1/C2CD2L/P2RX7/ORMDL3/EDN3/LRRC8A/ATP7A/ATP6V0A1	18	BP
GO:0030148	sphingolipid biosynthetic process	7/253	40/6899	0.000542214	0.000542214	0.0608253	P2RX7/ORMDL3/UGCG/B3GALT4/KDSR/GAL3ST1/SGMS2	7	BP
GO:0051604	protein maturation	11/253	93/6899	0.000550908	0.000550908	0.0608253	TLL2/DMBT1/CTSZ/P2RX7/FURIN/PISD/GGT1/IHH/TSPAN17/RCE1/CPE	11	BP
GO:0033344	cholesterol efflux	5/253	20/6899	0.000628506	0.000628506	0.0657407	SCARB1/TSKU/APOA1/APOC3/PPARG	5	BP
GO:0019432	triglyceride biosynthetic process	4/253	12/6899	0.000692676	0.000692676	0.0688301	MFSD2A/SREBF1/DGAT1/GPAT3	4	BP
GO:0051047	positive regulation of secretion	10/253	83/6899	0.000846317	0.000846317	0.0800925	PDX1/GPER1/SCT/P2RY2/C2CD2L/F2RL1/P2RX7/LRRC8A/PPARG/PTGES	10	BP
GO:0046460	neutral lipid biosynthetic process	4/253	13/6899	0.000971892	0.000971892	0.0814461	MFSD2A/SREBF1/DGAT1/GPAT3	4	BP
GO:0046463	acylglycerol biosynthetic process	4/253	13/6899	0.000971892	0.000971892	0.0814461	MFSD2A/SREBF1/DGAT1/GPAT3	4	BP
GO:0032368	regulation of lipid transport	7/253	44/6899	0.000983565	0.000983565	0.0814461	APOA1/P2RX7/APOC3/FURIN/LRAT/PPARG/PTGES	7	BP
GO:0046513	ceramide biosynthetic process	6/253	33/6899	0.0011024	0.0011024	0.0827235	P2RX7/ORMDL3/UGCG/B3GALT4/GAL3ST1/SGMS2	6	BP
GO:0008654	phospholipid biosynthetic process	10/253	86/6899	0.00111895	0.00111895	0.0827235	PGAP3/AGPAT2/PIGV/CDS1/ORMDL3/CDIPT/PISD/GPAT3/SGMS2/MBOAT7	10	BP
GO:0006869	lipid transport	13/253	133/6899	0.00112387	0.00112387	0.0827235	SCARB1/TSKU/MFSD2A/APOA1/P2RX7/APOC3/FURIN/UGCG/LRAT/PPARG/ATG9A/PTGES/SIGMAR1	13	BP
GO:0006650	glycerophospholipid metabolic process	11/253	102/6899	0.00120395	0.00120395	0.0830811	MFSD2A/LPGAT1/PGAP3/AGPAT2/PIGV/CDS1/CDIPT/PISD/SERINC2/ABHD3/MBOAT7	11	BP
GO:0090277	positive regulation of peptide hormone secretion	5/253	23/6899	0.00124653	0.00124653	0.0830811	PDX1/GPER1/SCT/C2CD2L/LRRC8A	5	BP
GO:0050708	regulation of protein secretion	9/253	73/6899	0.00129598	0.00129598	0.0830811	PDX1/GPER1/SIDT2/C2CD2L/F2RL1/P2RX7/LRRC8A/PPARG/GIP	9	BP
GO:1901264	carbohydrate derivative transport	4/253	14/6899	0.00132175	0.00132175	0.0830811	MFSD2A/LRRC8A/SLC37A2/SLC28A1	4	BP
GO:0018212	peptidyl-tyrosine modification	10/253	88/6899	0.00133775	0.00133775	0.0830811	HBEGF/EFNA1/TPST2/EREG/NEDD9/JAK3/SH2B3/SPINK1/EPHA1/UNC119	10	BP
GO:0006638	neutral lipid metabolic process	7/253	47/6899	0.00147006	0.00147006	0.0841763	ABHD2/MFSD2A/SREBF1/APOC3/DGAT1/GPAT3/MBOAT7	7	BP
GO:0006639	acylglycerol metabolic process	7/253	47/6899	0.00147006	0.00147006	0.0841763	ABHD2/MFSD2A/SREBF1/APOC3/DGAT1/GPAT3/MBOAT7	7	BP
GO:0006812	cation transport	22/253	301/6899	0.00148245	0.00148245	0.0841763	KCNE1/SLC5A10/GPER1/STIM1/SLC35G1/ATP2B1/SLC5A4/SLC13A2/VDR/SLC43A2/ATP1B3/SLC30A10/P2RX7/KCNK5/KCNG1/SLC5A1/KCNJ13/CD84/TCN2/SPINK1/ATP7A/SLC5A12	22	BP
GO:0002793	positive regulation of peptide secretion	5/253	24/6899	0.00152805	0.00152805	0.0843554	PDX1/GPER1/SCT/C2CD2L/LRRC8A	5	BP
GO:0032024	positive regulation of insulin secretion	4/253	15/6899	0.00175091	0.00175091	0.0884273	PDX1/GPER1/C2CD2L/LRRC8A	4	BP
GO:0061098	positive regulation of protein tyrosine kinase activity	4/253	15/6899	0.00175091	0.00175091	0.0884273	HBEGF/EREG/NEDD9/UNC119	4	BP
GO:0015748	organophosphate ester transport	6/253	36/6899	0.00176829	0.00176829	0.0884273	MFSD2A/APOA1/P2RX7/APOC3/LRRC8A/SLC37A2	6	BP
GO:0051222	positive regulation of protein transport	8/253	62/6899	0.00177979	0.00177979	0.0884273	PDX1/GPER1/C2CD2L/F2RL1/P2RX7/LRRC8A/PPARG/HYAL2	8	BP
GO:1902532	negative regulation of intracellular signal transduction	14/253	158/6899	0.00189815	0.00189815	0.0897125	PDX1/GPER1/RGS14/CASTOR2/F2RL1/P2RX7/SEMA6A/PTTG1IP/SH2B3/SPINK1/RNF157/HYAL2/TNFAIP1/SESN3	14	BP
GO:0051050	positive regulation of transport	17/253	213/6899	0.00202791	0.00202791	0.0897125	PDX1/KCNE1/GPER1/SCT/STIM1/ATP2B1/P2RY2/C2CD2L/F2RL1/APOA1/P2RX7/LRAT/LRRC8A/PPARG/SFTPD/PTGES/HYAL2	17	BP
GO:0062012	regulation of small molecule metabolic process	10/253	93/6899	0.00204014	0.00204014	0.0897125	GPER1/MFSD2A/SREBF1/P2RX7/APOC3/FAM3C/TFF3/PPARG/CD244/GIP	10	BP
GO:0006641	triglyceride metabolic process	6/253	37/6899	0.00204688	0.00204688	0.0897125	MFSD2A/SREBF1/APOC3/DGAT1/GPAT3/MBOAT7	6	BP
GO:0030301	cholesterol transport	6/253	37/6899	0.00204688	0.00204688	0.0897125	SCARB1/TSKU/APOA1/APOC3/FURIN/PPARG	6	BP
GO:1903532	positive regulation of secretion by cell	9/253	78/6899	0.0020765	0.0020765	0.0897125	PDX1/GPER1/SCT/C2CD2L/F2RL1/P2RX7/LRRC8A/PPARG/PTGES	9	BP
GO:0019637	organophosphate metabolic process	24/253	351/6899	0.00225071	0.00225071	0.0939018	GPER1/MFSD2A/LPGAT1/ENPP7/SMPD3/PGAP3/AGPAT2/PIGV/GPD1/CDS1/P2RX7/ORMDL3/ELOVL1/CDIPT/PISD/SERINC2/LOC100624541/GPAT3/CD244/ABHD3/NAXD/SGMS2/PFKFB4/MBOAT7	24	BP
GO:0090207	regulation of triglyceride metabolic process	4/253	16/6899	0.00226797	0.00226797	0.0939018	MFSD2A/SREBF1/APOC3/MBOAT7	4	BP
GO:0015918	sterol transport	6/253	38/6899	0.00235741	0.00235741	0.0956129	SCARB1/TSKU/APOA1/APOC3/FURIN/PPARG	6	BP
GO:0019725	cellular homeostasis	18/253	237/6899	0.00261396	0.00261396	0.103384	PDX1/GPER1/CYBRD1/SCT/STIM1/SLC40A1/SLC35G1/ATP2B1/SIDT2/VDR/FRRS1/C2CD2L/P2RX7/ORMDL3/EDN3/LRRC8A/ATP7A/ATP6V0A1	18	BP
GO:0032370	positive regulation of lipid transport	5/253	27/6899	0.00265305	0.00265305	0.103384	APOA1/P2RX7/LRAT/PPARG/PTGES	5	BP
GO:0050878	regulation of body fluid levels	11/253	113/6899	0.0027568	0.0027568	0.105361	F10/AQP7/SCT/P2RY2/CLDN4/VDR/F2RL1/UGCG/SH2B3/LOC100520680/ADM	11	BP
GO:1904951	positive regulation of establishment of protein localization	8/253	67/6899	0.00293342	0.00293342	0.109996	PDX1/GPER1/C2CD2L/F2RL1/P2RX7/LRRC8A/PPARG/HYAL2	8	BP
GO:1905952	regulation of lipid localization	7/253	53/6899	0.00298956	0.00298956	0.110025	APOA1/P2RX7/APOC3/FURIN/LRAT/PPARG/PTGES	7	BP
GO:0034308	primary alcohol metabolic process	5/253	28/6899	0.00313474	0.00313474	0.11327	CYP1A1/ADH4/RETSAT/LRAT/LOC100624541	5	BP
GO:0010876	lipid localization	13/253	151/6899	0.0035136	0.0035136	0.124693	SCARB1/TSKU/MFSD2A/APOA1/P2RX7/APOC3/FURIN/UGCG/LRAT/PPARG/ATG9A/PTGES/SIGMAR1	13	BP
GO:0018108	peptidyl-tyrosine phosphorylation	9/253	86/6899	0.0040623	0.0040623	0.135743	HBEGF/EFNA1/EREG/NEDD9/JAK3/SH2B3/SPINK1/EPHA1/UNC119	9	BP
GO:0055080	cation homeostasis	15/253	190/6899	0.00406959	0.00406959	0.135743	GPER1/CYBRD1/STIM1/SLC40A1/SLC35G1/ATP2B1/VDR/FRRS1/P2RX7/EDN3/SLC11A2/ATP7A/HYAL2/SLC9A2/ATP6V0A1	15	BP
GO:1901615	organic hydroxy compound metabolic process	15/253	190/6899	0.00406959	0.00406959	0.135743	CYP1A1/GPER1/TSKU/SREBF1/ADH4/APOA1/RETSAT/IYD/LRAT/HAGHL/LOC100624541/SPR/MFSD12/CD244/ATP7A	15	BP
GO:0043409	negative regulation of MAPK cascade	7/253	56/6899	0.00409817	0.00409817	0.135743	GPER1/RGS14/F2RL1/P2RX7/SEMA6A/SH2B3/HYAL2	7	BP
GO:0006672	ceramide metabolic process	6/253	43/6899	0.00446868	0.00446868	0.142493	P2RX7/ORMDL3/UGCG/B3GALT4/GAL3ST1/SGMS2	6	BP
GO:0042157	lipoprotein metabolic process	7/253	57/6899	0.00452934	0.00452934	0.142493	PGAP3/PIGV/APOA1/APOC3/UGCG/ZDHHC7/ZDHHC9	7	BP
GO:0030335	positive regulation of cell migration	12/253	138/6899	0.00458606	0.00458606	0.142493	GPER1/HBEGF/CLDN4/RHOD/F2RL1/SEMA6A/PIK3CD/CCL5/NEDD9/HYAL1/EPHA1/CD99L2	12	BP
GO:1903829	positive regulation of protein localization	10/253	104/6899	0.00463741	0.00463741	0.142493	PDX1/GPER1/C2CD2L/F2RL1/P2RX7/ORMDL3/LRRC8A/NEDD9/PPARG/HYAL2	10	BP
GO:0035886	vascular associated smooth muscle cell differentiation	3/253	10/6899	0.00482897	0.00482897	0.142493	GPER1/MESP1/ADM	3	BP
GO:0045742	positive regulation of epidermal growth factor receptor signaling pathway	3/253	10/6899	0.00482897	0.00482897	0.142493	GPER1/HBEGF/EREG	3	BP
GO:1902932	positive regulation of alcohol biosynthetic process	3/253	10/6899	0.00482897	0.00482897	0.142493	GPER1/SREBF1/CD244	3	BP
GO:0098771	inorganic ion homeostasis	15/253	194/6899	0.00494146	0.00494146	0.142493	GPER1/CYBRD1/STIM1/SLC40A1/SLC35G1/ATP2B1/VDR/FRRS1/P2RX7/EDN3/SLC11A2/ATP7A/HYAL2/SLC9A2/ATP6V0A1	15	BP
GO:0090276	regulation of peptide hormone secretion	7/253	58/6899	0.0049939	0.0049939	0.142493	PDX1/GPER1/SCT/SIDT2/C2CD2L/LRRC8A/GIP	7	BP
GO:0050796	regulation of insulin secretion	6/253	44/6899	0.00501896	0.00501896	0.142493	PDX1/GPER1/SIDT2/C2CD2L/LRRC8A/GIP	6	BP
GO:0032371	regulation of sterol transport	4/253	20/6899	0.00537962	0.00537962	0.143651	APOA1/APOC3/FURIN/PPARG	4	BP
GO:0032374	regulation of cholesterol transport	4/253	20/6899	0.00537962	0.00537962	0.143651	APOA1/APOC3/FURIN/PPARG	4	BP
GO:0097006	regulation of plasma lipoprotein particle levels	4/253	20/6899	0.00537962	0.00537962	0.143651	SCARB1/MFSD2A/APOC3/MYLIP	4	BP
GO:0050801	ion homeostasis	15/253	196/6899	0.00543117	0.00543117	0.143651	GPER1/CYBRD1/STIM1/SLC40A1/SLC35G1/ATP2B1/VDR/FRRS1/P2RX7/EDN3/SLC11A2/ATP7A/HYAL2/SLC9A2/ATP6V0A1	15	BP
GO:0002791	regulation of peptide secretion	7/253	59/6899	0.00549344	0.00549344	0.143651	PDX1/GPER1/SCT/SIDT2/C2CD2L/LRRC8A/GIP	7	BP
GO:0090087	regulation of peptide transport	7/253	59/6899	0.00549344	0.00549344	0.143651	PDX1/GPER1/SCT/SIDT2/C2CD2L/LRRC8A/GIP	7	BP
GO:0006066	alcohol metabolic process	11/253	125/6899	0.00598118	0.00598118	0.152234	CYP1A1/GPER1/TSKU/SREBF1/ADH4/APOA1/RETSAT/LRAT/LOC100624541/SPR/CD244	11	BP
GO:0046890	regulation of lipid biosynthetic process	7/253	60/6899	0.00602953	0.00602953	0.152234	GPER1/MFSD2A/SREBF1/APOC3/ORMDL3/PPARG/GIP	7	BP
GO:0010817	regulation of hormone levels	13/253	161/6899	0.00605145	0.00605145	0.152234	PDX1/CYP1A1/GPER1/SCT/SIDT2/C2CD2L/FURIN/RETSAT/IYD/LRAT/LRRC8A/LOC100624541/GIP	13	BP
GO:0002474	antigen processing and presentation of peptide antigen via MHC class I	3/253	11/6899	0.00646156	0.00646156	0.16003	MFSD6/ABCB9/TAPBP	3	BP
GO:1905954	positive regulation of lipid localization	5/253	33/6899	0.0065224	0.0065224	0.16003	APOA1/P2RX7/LRAT/PPARG/PTGES	5	BP
GO:0050679	positive regulation of epithelial cell proliferation	7/253	61/6899	0.00660376	0.00660376	0.16005	PDX1/B4GALT1/PPP1R16B/PIK3CD/CCL5/HYAL1/NRARP	7	BP
GO:0051049	regulation of transport	28/253	471/6899	0.00726673	0.00726673	0.173559	PDX1/KCNE1/GPER1/SCT/STIM1/ATP2B1/P2RY2/SIDT2/SLC43A2/C2CD2L/F2RL1/APOA1/P2RX7/APOC3/FURIN/KCNG1/LRAT/LRRC8A/KCNJ13/CD84/SLC35F6/PPARG/SPINK1/SFTPD/PTGES/HYAL2/GIP/UNC119	28	BP
GO:0009247	glycolipid biosynthetic process	5/253	34/6899	0.00742313	0.00742313	0.173559	PGAP3/PIGV/UGCG/B3GALT4/GAL3ST1	5	BP
GO:0034219	carbohydrate transmembrane transport	5/253	34/6899	0.00742313	0.00742313	0.173559	SLC2A8/AQP7/SLC5A1/ZDHHC7/AQP10	5	BP
GO:0006023	aminoglycan biosynthetic process	4/253	22/6899	0.00766857	0.00766857	0.175176	B3GNT8/GLCE/HYAL1/PXYLP1	4	BP
GO:0019217	regulation of fatty acid metabolic process	4/253	22/6899	0.00766857	0.00766857	0.175176	MFSD2A/APOC3/PPARG/GIP	4	BP
GO:0055065	metal ion homeostasis	13/253	166/6899	0.00778024	0.00778024	0.175707	GPER1/CYBRD1/STIM1/SLC40A1/SLC35G1/ATP2B1/VDR/FRRS1/P2RX7/EDN3/SLC11A2/ATP7A/HYAL2	13	BP
GO:2000147	positive regulation of cell motility	12/253	148/6899	0.0079608	0.0079608	0.175873	GPER1/HBEGF/CLDN4/RHOD/F2RL1/SEMA6A/PIK3CD/CCL5/NEDD9/HYAL1/EPHA1/CD99L2	12	BP
GO:0006688	glycosphingolipid biosynthetic process	3/253	12/6899	0.00838452	0.00838452	0.175873	UGCG/B3GALT4/GAL3ST1	3	BP
GO:0032890	regulation of organic acid transport	3/253	12/6899	0.00838452	0.00838452	0.175873	SLC43A2/P2RX7/PTGES	3	BP
GO:0034381	plasma lipoprotein particle clearance	3/253	12/6899	0.00838452	0.00838452	0.175873	SCARB1/APOC3/MYLIP	3	BP
GO:0061178	regulation of insulin secretion involved in cellular response to glucose stimulus	3/253	12/6899	0.00838452	0.00838452	0.175873	PDX1/SIDT2/C2CD2L	3	BP
GO:1901186	positive regulation of ERBB signaling pathway	3/253	12/6899	0.00838452	0.00838452	0.175873	GPER1/HBEGF/EREG	3	BP
GO:0001678	cellular glucose homeostasis	5/253	35/6899	0.00840708	0.00840708	0.175873	PDX1/GPER1/SIDT2/C2CD2L/LRRC8A	5	BP
GO:0046474	glycerophospholipid biosynthetic process	7/253	64/6899	0.0085712	0.0085712	0.177439	PGAP3/AGPAT2/PIGV/CDS1/CDIPT/PISD/MBOAT7	7	BP
GO:0051223	regulation of protein transport	10/253	114/6899	0.00879433	0.00879433	0.180181	PDX1/GPER1/SIDT2/C2CD2L/F2RL1/P2RX7/LRRC8A/PPARG/HYAL2/GIP	10	BP
GO:0005975	carbohydrate metabolic process	16/253	227/6899	0.00901891	0.00901891	0.181083	PDX1/GPER1/B4GALT1/RGN/GPD1/P2RX7/FUOM/PMM1/MAN1A2/FAM3C/TFF3/B3GNT8/CD244/HYAL1/HYAL2/PFKFB4	16	BP
GO:0061097	regulation of protein tyrosine kinase activity	4/253	23/6899	0.00902058	0.00902058	0.181083	HBEGF/EREG/NEDD9/UNC119	4	BP
GO:0003018	vascular process in circulatory system	7/253	65/6899	0.00931389	0.00931389	0.183438	MFSD2A/ATP2B1/P2RY2/F2RL1/EDN3/SLC5A1/ADM	7	BP
GO:0015833	peptide transport	8/253	81/6899	0.00932915	0.00932915	0.183438	PDX1/GPER1/SCT/SIDT2/C2CD2L/LRRC8A/GIP/ABCB9	8	BP
GO:0043270	positive regulation of ion transport	6/253	50/6899	0.00941479	0.00941479	0.183438	KCNE1/GPER1/STIM1/ATP2B1/P2RX7/PTGES	6	BP
GO:0040017	positive regulation of locomotion	12/253	153/6899	0.0102557	0.0102557	0.193977	GPER1/HBEGF/CLDN4/RHOD/F2RL1/SEMA6A/PIK3CD/CCL5/NEDD9/HYAL1/EPHA1/CD99L2	12	BP
GO:2000106	regulation of leukocyte apoptotic process	4/253	24/6899	0.0105191	0.0105191	0.193977	P2RX7/ORMDL3/PIK3CD/CCL5	4	BP
GO:0002115	store-operated calcium entry	3/253	13/6899	0.0106083	0.0106083	0.193977	STIM1/CD84/SPINK1	3	BP
GO:0006833	water transport	3/253	13/6899	0.0106083	0.0106083	0.193977	AQP7/SLC5A1/AQP10	3	BP
GO:0051898	negative regulation of protein kinase B signaling	3/253	13/6899	0.0106083	0.0106083	0.193977	GPER1/SH2B3/HYAL2	3	BP
GO:0046887	positive regulation of hormone secretion	5/253	37/6899	0.0106389	0.0106389	0.193977	PDX1/GPER1/SCT/C2CD2L/LRRC8A	5	BP
GO:0062013	positive regulation of small molecule metabolic process	5/253	37/6899	0.0106389	0.0106389	0.193977	GPER1/SREBF1/P2RX7/PPARG/CD244	5	BP
GO:0015850	organic hydroxy compound transport	8/253	83/6899	0.0107482	0.0107482	0.194187	SCARB1/AQP7/TSKU/APOA1/APOC3/FURIN/PPARG/AQP10	8	BP
GO:0009306	protein secretion	9/253	101/6899	0.0114865	0.0114865	0.204251	PDX1/GPER1/SIDT2/C2CD2L/F2RL1/P2RX7/LRRC8A/PPARG/GIP	9	BP
GO:0009746	response to hexose	5/253	38/6899	0.0118937	0.0118937	0.204251	PDX1/GPER1/SIDT2/C2CD2L/GIP	5	BP
GO:0009749	response to glucose	5/253	38/6899	0.0118937	0.0118937	0.204251	PDX1/GPER1/SIDT2/C2CD2L/GIP	5	BP
GO:0034284	response to monosaccharide	5/253	38/6899	0.0118937	0.0118937	0.204251	PDX1/GPER1/SIDT2/C2CD2L/GIP	5	BP
GO:0015914	phospholipid transport	4/253	25/6899	0.0121696	0.0121696	0.204251	MFSD2A/APOA1/P2RX7/APOC3	4	BP
GO:0030104	water homeostasis	4/253	25/6899	0.0121696	0.0121696	0.204251	AQP7/SCT/CLDN4/UGCG	4	BP
GO:0035592	establishment of protein localization to extracellular region	9/253	102/6899	0.0122077	0.0122077	0.204251	PDX1/GPER1/SIDT2/C2CD2L/F2RL1/P2RX7/LRRC8A/PPARG/GIP	9	BP
GO:0071375	cellular response to peptide hormone stimulus	7/253	69/6899	0.012761	0.012761	0.204251	SLC2A8/GPER1/MZB1/ATP2B1/ZDHHC7/JAK3/PPARG	7	BP
GO:0006875	cellular metal ion homeostasis	11/253	139/6899	0.0128762	0.0128762	0.204251	GPER1/CYBRD1/STIM1/SLC40A1/SLC35G1/ATP2B1/VDR/FRRS1/P2RX7/EDN3/ATP7A	11	BP
GO:0019216	regulation of lipid metabolic process	9/253	103/6899	0.0129622	0.0129622	0.204251	GPER1/SCT/MFSD2A/SREBF1/APOC3/ORMDL3/PPARG/GIP/MBOAT7	9	BP
GO:0071692	protein localization to extracellular region	9/253	103/6899	0.0129622	0.0129622	0.204251	PDX1/GPER1/SIDT2/C2CD2L/F2RL1/P2RX7/LRRC8A/PPARG/GIP	9	BP
GO:0030003	cellular cation homeostasis	12/253	158/6899	0.0130337	0.0130337	0.204251	GPER1/CYBRD1/STIM1/SLC40A1/SLC35G1/ATP2B1/VDR/FRRS1/P2RX7/EDN3/ATP7A/ATP6V0A1	12	BP
GO:0070201	regulation of establishment of protein localization	10/253	121/6899	0.0130912	0.0130912	0.204251	PDX1/GPER1/SIDT2/C2CD2L/F2RL1/P2RX7/LRRC8A/PPARG/HYAL2/GIP	10	BP
GO:0001523	retinoid metabolic process	3/253	14/6899	0.013141	0.013141	0.204251	CYP1A1/RETSAT/LRAT	3	BP
GO:0016101	diterpenoid metabolic process	3/253	14/6899	0.013141	0.013141	0.204251	CYP1A1/RETSAT/LRAT	3	BP
GO:0035773	insulin secretion involved in cellular response to glucose stimulus	3/253	14/6899	0.013141	0.013141	0.204251	PDX1/SIDT2/C2CD2L	3	BP
GO:0008277	regulation of G protein-coupled receptor signaling pathway	5/253	39/6899	0.0132454	0.0132454	0.204251	GPER1/RGS14/ZDHHC7/RNF157/ADM	5	BP
GO:0055072	iron ion homeostasis	5/253	39/6899	0.0132454	0.0132454	0.204251	CYBRD1/SLC40A1/FRRS1/SLC11A2/HYAL2	5	BP
GO:0051046	regulation of secretion	13/253	178/6899	0.0135308	0.0135308	0.204251	PDX1/GPER1/SCT/P2RY2/SIDT2/C2CD2L/F2RL1/P2RX7/LRRC8A/CD84/PPARG/PTGES/GIP	13	BP
GO:0030073	insulin secretion	6/253	54/6899	0.0135565	0.0135565	0.204251	PDX1/GPER1/SIDT2/C2CD2L/LRRC8A/GIP	6	BP
GO:0055085	transmembrane transport	21/253	342/6899	0.0137288	0.0137288	0.204251	SLC2A8/KCNE1/GPER1/AQP7/STIM1/SLC35G1/SLC43A2/P2RX7/KCNK5/KCNG1/SLC19A3/SLC5A1/LRRC8A/SLC37A2/KCNJ13/LRRC8B/ZDHHC7/TCN2/ATP7A/ABCB9/AQP10	21	BP
GO:0031638	zymogen activation	4/253	26/6899	0.0139773	0.0139773	0.204251	DMBT1/CTSZ/FURIN/GGT1	4	BP
GO:0051145	smooth muscle cell differentiation	4/253	26/6899	0.0139773	0.0139773	0.204251	GPER1/MESP1/EREG/ADM	4	BP
GO:0071326	cellular response to monosaccharide stimulus	4/253	26/6899	0.0139773	0.0139773	0.204251	PDX1/GPER1/SIDT2/C2CD2L	4	BP
GO:0071331	cellular response to hexose stimulus	4/253	26/6899	0.0139773	0.0139773	0.204251	PDX1/GPER1/SIDT2/C2CD2L	4	BP
GO:0071333	cellular response to glucose stimulus	4/253	26/6899	0.0139773	0.0139773	0.204251	PDX1/GPER1/SIDT2/C2CD2L	4	BP
GO:0048871	multicellular organismal homeostasis	11/253	141/6899	0.0142197	0.0142197	0.206275	AQP7/TSKU/MFSD2A/CLDN4/GPR55/P2RX7/UGCG/SASH3/SFTPD/PTGES/HYAL2	11	BP
GO:0009743	response to carbohydrate	5/253	40/6899	0.0146972	0.0146972	0.211657	PDX1/GPER1/SIDT2/C2CD2L/GIP	5	BP
GO:0006873	cellular ion homeostasis	12/253	162/6899	0.0156444	0.0156444	0.215323	GPER1/CYBRD1/STIM1/SLC40A1/SLC35G1/ATP2B1/VDR/FRRS1/P2RX7/EDN3/ATP7A/ATP6V0A1	12	BP
GO:0030072	peptide hormone secretion	7/253	72/6899	0.0158894	0.0158894	0.215323	PDX1/GPER1/SCT/SIDT2/C2CD2L/LRRC8A/GIP	7	BP
GO:0019229	regulation of vasoconstriction	4/253	27/6899	0.0159468	0.0159468	0.215323	ATP2B1/F2RL1/EDN3/ADM	4	BP
GO:0051928	positive regulation of calcium ion transport	4/253	27/6899	0.0159468	0.0159468	0.215323	GPER1/STIM1/ATP2B1/P2RX7	4	BP
GO:0071322	cellular response to carbohydrate stimulus	4/253	27/6899	0.0159468	0.0159468	0.215323	PDX1/GPER1/SIDT2/C2CD2L	4	BP
GO:0042886	amide transport	8/253	89/6899	0.0159652	0.0159652	0.215323	PDX1/GPER1/SCT/SIDT2/C2CD2L/LRRC8A/GIP/ABCB9	8	BP
GO:0006884	cell volume homeostasis	3/253	15/6899	0.0159885	0.0159885	0.215323	SCT/P2RX7/LRRC8A	3	BP
GO:0042304	regulation of fatty acid biosynthetic process	3/253	15/6899	0.0159885	0.0159885	0.215323	APOC3/PPARG/GIP	3	BP
GO:0044070	regulation of anion transport	3/253	15/6899	0.0159885	0.0159885	0.215323	SLC43A2/P2RX7/PTGES	3	BP
GO:0002702	positive regulation of production of molecular mediator of immune response	5/253	41/6899	0.0162519	0.0162519	0.215323	MZB1/F2RL1/P2RX7/SASH3/CD244	5	BP
GO:0006022	aminoglycan metabolic process	5/253	41/6899	0.0162519	0.0162519	0.215323	B3GNT8/GLCE/HYAL1/HYAL2/PXYLP1	5	BP
GO:0006497	protein lipidation	5/253	41/6899	0.0162519	0.0162519	0.215323	PGAP3/PIGV/UGCG/ZDHHC7/ZDHHC9	5	BP
GO:0002790	peptide secretion	7/253	73/6899	0.0170435	0.0170435	0.22284	PDX1/GPER1/SCT/SIDT2/C2CD2L/LRRC8A/GIP	7	BP
GO:0050730	regulation of peptidyl-tyrosine phosphorylation	7/253	73/6899	0.0170435	0.0170435	0.22284	HBEGF/EFNA1/EREG/NEDD9/SH2B3/SPINK1/UNC119	7	BP
GO:0055076	transition metal ion homeostasis	6/253	57/6899	0.017398	0.017398	0.225989	CYBRD1/SLC40A1/FRRS1/SLC11A2/ATP7A/HYAL2	6	BP
GO:0006664	glycolipid metabolic process	5/253	42/6899	0.0179124	0.0179124	0.22889	PGAP3/PIGV/UGCG/B3GALT4/GAL3ST1	5	BP
GO:1903509	liposaccharide metabolic process	5/253	42/6899	0.0179124	0.0179124	0.22889	PGAP3/PIGV/UGCG/B3GALT4/GAL3ST1	5	BP
GO:0001776	leukocyte homeostasis	4/253	28/6899	0.0180821	0.0180821	0.22889	P2RX7/PIK3CD/SASH3/SH2B3	4	BP
GO:0035023	regulation of Rho protein signal transduction	4/253	28/6899	0.0180821	0.0180821	0.22889	GPR55/F2RL1/APOC3/TNFAIP1	4	BP
GO:1902105	regulation of leukocyte differentiation	7/253	74/6899	0.0182556	0.0182556	0.229624	GPR55/TMEM176B/SASH3/NEDD9/CD101/NRARP/IKZF3	7	BP
GO:0042044	fluid transport	3/253	16/6899	0.0191548	0.0191548	0.234986	AQP7/SLC5A1/AQP10	3	BP
GO:0045744	negative regulation of G protein-coupled receptor signaling pathway	3/253	16/6899	0.0191548	0.0191548	0.234986	RGS14/RNF157/ADM	3	BP
GO:0046470	phosphatidylcholine metabolic process	3/253	16/6899	0.0191548	0.0191548	0.234986	MFSD2A/ABHD3/MBOAT7	3	BP
GO:0051353	positive regulation of oxidoreductase activity	3/253	16/6899	0.0191548	0.0191548	0.234986	VDR/EDN3/ATP7A	3	BP
GO:1903530	regulation of secretion by cell	12/253	167/6899	0.0194442	0.0194442	0.237073	PDX1/GPER1/SCT/SIDT2/C2CD2L/F2RL1/P2RX7/LRRC8A/CD84/PPARG/PTGES/GIP	12	BP
GO:0006633	fatty acid biosynthetic process	6/253	59/6899	0.020339	0.020339	0.242614	ABHD2/APOC3/ELOVL1/PPARG/PTGES/GIP	6	BP
GO:0006814	sodium ion transport	6/253	59/6899	0.020339	0.020339	0.242614	SLC5A10/SLC5A4/SLC13A2/ATP1B3/SLC5A1/SLC5A12	6	BP
GO:0006720	isoprenoid metabolic process	4/253	29/6899	0.020387	0.020387	0.242614	CYP1A1/BCO1/RETSAT/LRAT	4	BP
GO:0010977	negative regulation of neuron projection development	4/253	29/6899	0.020387	0.020387	0.242614	TSKU/EFNA1/SEMA6A/MYLIP	4	BP
GO:0006575	cellular modified amino acid metabolic process	7/253	76/6899	0.0208595	0.0208595	0.246759	MFSD2A/IYD/SERINC2/GGT1/LOC100624541/GCLC/GSTK1	7	BP
GO:0042158	lipoprotein biosynthetic process	5/253	44/6899	0.0215611	0.0215611	0.253549	PGAP3/PIGV/UGCG/ZDHHC7/ZDHHC9	5	BP
GO:0051241	negative regulation of multicellular organismal process	17/253	272/6899	0.0217589	0.0217589	0.25365	SCT/TSKU/ATP2B1/RNF128/GPR55/F2RL1/TMEM176B/P2RX7/SEMA6A/APOC3/FURIN/MESP1/CD84/SH2B3/NRARP/MYLIP/ADM	17	BP
GO:0090407	organophosphate biosynthetic process	13/253	190/6899	0.0221088	0.0221088	0.25365	GPER1/PGAP3/AGPAT2/PIGV/CDS1/ORMDL3/ELOVL1/CDIPT/PISD/GPAT3/CD244/SGMS2/MBOAT7	13	BP
GO:0098660	inorganic ion transmembrane transport	13/253	190/6899	0.0221088	0.0221088	0.25365	KCNE1/GPER1/STIM1/SLC35G1/P2RX7/KCNK5/KCNG1/SLC5A1/LRRC8A/SLC37A2/KCNJ13/TCN2/ATP7A	13	BP
GO:0006721	terpenoid metabolic process	3/253	17/6899	0.022642	0.022642	0.25365	CYP1A1/RETSAT/LRAT	3	BP
GO:0042058	regulation of epidermal growth factor receptor signaling pathway	3/253	17/6899	0.022642	0.022642	0.25365	GPER1/HBEGF/EREG	3	BP
GO:0048002	antigen processing and presentation of peptide antigen	3/253	17/6899	0.022642	0.022642	0.25365	MFSD6/ABCB9/TAPBP	3	BP
GO:1902930	regulation of alcohol biosynthetic process	3/253	17/6899	0.022642	0.022642	0.25365	GPER1/SREBF1/CD244	3	BP
GO:0005996	monosaccharide metabolic process	8/253	95/6899	0.0228082	0.0228082	0.25365	PDX1/B4GALT1/RGN/FUOM/PMM1/FAM3C/TFF3/PFKFB4	8	BP
GO:0071887	leukocyte apoptotic process	4/253	30/6899	0.0228647	0.0228647	0.25365	P2RX7/ORMDL3/PIK3CD/CCL5	4	BP
GO:1904064	positive regulation of cation transmembrane transport	4/253	30/6899	0.0228647	0.0228647	0.25365	KCNE1/GPER1/STIM1/P2RX7	4	BP
GO:0007169	transmembrane receptor protein tyrosine kinase signaling pathway	13/253	191/6899	0.0229736	0.0229736	0.25365	SLC2A8/GPER1/HBEGF/MZB1/EFNA1/SEMA6A/PIK3CD/EREG/NEDD9/JAK3/SH2B3/FRK/EPHA1	13	BP
GO:0051896	regulation of protein kinase B signaling	5/253	45/6899	0.023554	0.023554	0.257506	GPER1/HBEGF/PIK3CD/SH2B3/HYAL2	5	BP
GO:0006820	anion transport	9/253	114/6899	0.0237058	0.0237058	0.257506	SLC16A9/SLC43A2/SLC52A2/P2RX7/LRRC8A/SLC37A2/LRRC8B/PTGES/OSTM1	9	BP
GO:0046883	regulation of hormone secretion	7/253	78/6899	0.0237115	0.0237115	0.257506	PDX1/GPER1/SCT/SIDT2/C2CD2L/LRRC8A/GIP	7	BP
GO:0032755	positive regulation of interleukin-6 production	4/253	31/6899	0.0255179	0.0255179	0.274127	F2RL1/P2RX7/EREG/HYAL2	4	BP
GO:0050829	defense response to Gram-negative bacterium	4/253	31/6899	0.0255179	0.0255179	0.274127	DMBT1/F2RL1/BPI/LYPD8	4	BP
GO:0006024	glycosaminoglycan biosynthetic process	3/253	18/6899	0.0264505	0.0264505	0.278132	GLCE/HYAL1/PXYLP1	3	BP
GO:0006687	glycosphingolipid metabolic process	3/253	18/6899	0.0264505	0.0264505	0.278132	UGCG/B3GALT4/GAL3ST1	3	BP
GO:0030888	regulation of B cell proliferation	3/253	18/6899	0.0264505	0.0264505	0.278132	MZB1/SASH3/IKZF3	3	BP
GO:2000403	positive regulation of lymphocyte migration	3/253	18/6899	0.0264505	0.0264505	0.278132	CCL5/NEDD9/CD99L2	3	BP
GO:0140352	export from cell	16/253	258/6899	0.0272682	0.0272682	0.285221	PDX1/KCNE1/GPER1/SCT/SLC35G1/SIDT2/C2CD2L/F2RL1/P2RX7/FURIN/LRRC8A/CD84/PPARG/PTGES/GIP/SCAMP1	16	BP
GO:0055088	lipid homeostasis	5/253	47/6899	0.0278877	0.0278877	0.290174	TSKU/ANGPTL4/APOC3/ORMDL3/MYLIP	5	BP
GO:0034767	positive regulation of ion transmembrane transport	4/253	32/6899	0.0283488	0.0283488	0.293116	KCNE1/GPER1/STIM1/P2RX7	4	BP
GO:1901653	cellular response to peptide	7/253	81/6899	0.0284762	0.0284762	0.293116	SLC2A8/GPER1/MZB1/ATP2B1/ZDHHC7/JAK3/PPARG	7	BP
GO:0071417	cellular response to organonitrogen compound	10/253	137/6899	0.028613	0.028613	0.293116	SLC2A8/KCNE1/GPER1/MZB1/ATP2B1/ZDHHC7/JAK3/PPARG/AOC1/SESN3	10	BP
GO:0010959	regulation of metal ion transport	8/253	100/6899	0.029913	0.029913	0.300855	KCNE1/GPER1/STIM1/ATP2B1/P2RX7/KCNG1/CD84/SPINK1	8	BP
GO:0008361	regulation of cell size	5/253	48/6899	0.0302322	0.0302322	0.300855	SCT/P2RX7/SEMA6A/LRRC8A/ZFYVE27	5	BP
GO:0032869	cellular response to insulin stimulus	5/253	48/6899	0.0302322	0.0302322	0.300855	SLC2A8/MZB1/ATP2B1/ZDHHC7/PPARG	5	BP
GO:0042060	wound healing	9/253	119/6899	0.0302565	0.0302565	0.300855	F10/HBEGF/B4GALT1/TSKU/CLDN4/F2RL1/CHMP1A/SH2B3/LOC100520680	9	BP
GO:0007340	acrosome reaction	3/253	19/6899	0.0305795	0.0305795	0.300855	ABHD2/B4GALT1/SPINK1	3	BP
GO:0007589	body fluid secretion	3/253	19/6899	0.0305795	0.0305795	0.300855	SCT/P2RY2/VDR	3	BP
GO:0019748	secondary metabolic process	3/253	19/6899	0.0305795	0.0305795	0.300855	CYP1A1/MFSD12/ATP7A	3	BP
GO:0050766	positive regulation of phagocytosis	3/253	19/6899	0.0305795	0.0305795	0.300855	F2RL1/APOA1/SFTPD	3	BP
GO:0051924	regulation of calcium ion transport	6/253	65/6899	0.0311376	0.0311376	0.302537	GPER1/STIM1/ATP2B1/P2RX7/CD84/SPINK1	6	BP
GO:0023061	signal release	10/253	139/6899	0.031211	0.031211	0.302537	PDX1/GPER1/SCT/SIDT2/C2CD2L/F2RL1/P2RX7/LRRC8A/PTGES/GIP	10	BP
GO:0033559	unsaturated fatty acid metabolic process	4/253	33/6899	0.0313594	0.0313594	0.302537	ELOVL1/PPARG/EPHX1/PTGES	4	BP
GO:0061041	regulation of wound healing	4/253	33/6899	0.0313594	0.0313594	0.302537	HBEGF/CLDN4/F2RL1/SH2B3	4	BP
GO:0050866	negative regulation of cell activation	5/253	49/6899	0.0326972	0.0326972	0.313919	GPER1/VSIR/CD84/SH2B3/NRARP	5	BP
GO:0050673	epithelial cell proliferation	10/253	141/6899	0.0339716	0.0339716	0.320045	PDX1/B4GALT1/SIDT2/VDR/PPP1R16B/PIK3CD/EREG/CCL5/HYAL1/NRARP	10	BP
GO:0032880	regulation of protein localization	13/253	202/6899	0.0342186	0.0342186	0.320045	PDX1/GPER1/SIDT2/C2CD2L/F2RL1/P2RX7/ORMDL3/LRRC8A/NEDD9/ZDHHC7/PPARG/HYAL2/GIP	13	BP
GO:0000302	response to reactive oxygen species	4/253	34/6899	0.0345509	0.0345509	0.320045	HYAL1/HYAL2/SESN3/SIGMAR1	4	BP
GO:0006939	smooth muscle contraction	4/253	34/6899	0.0345509	0.0345509	0.320045	GPER1/ATP2B1/ORMDL3/EDN3	4	BP
GO:0009636	response to toxic substance	4/253	34/6899	0.0345509	0.0345509	0.320045	ABTB2/CYP1A1/EPHX1/AQP10	4	BP
GO:0120254	olefinic compound metabolic process	4/253	34/6899	0.0345509	0.0345509	0.320045	CYP1A1/RETSAT/LRAT/EPHX1	4	BP
GO:0002683	negative regulation of immune system process	8/253	103/6899	0.0348389	0.0348389	0.320045	GPER1/PVRIG/VSIR/GPR55/TMEM176B/CD46/CD84/NRARP	8	BP
GO:0045913	positive regulation of carbohydrate metabolic process	3/253	20/6899	0.0350266	0.0350266	0.320045	GPER1/P2RX7/CD244	3	BP
GO:1901184	regulation of ERBB signaling pathway	3/253	20/6899	0.0350266	0.0350266	0.320045	GPER1/HBEGF/EREG	3	BP
GO:0032635	interleukin-6 production	5/253	50/6899	0.0352841	0.0352841	0.320045	F2RL1/P2RX7/EREG/CD84/HYAL2	5	BP
GO:0032675	regulation of interleukin-6 production	5/253	50/6899	0.0352841	0.0352841	0.320045	F2RL1/P2RX7/EREG/CD84/HYAL2	5	BP
GO:0009611	response to wounding	10/253	142/6899	0.0354141	0.0354141	0.320045	F10/HBEGF/ABHD2/B4GALT1/TSKU/CLDN4/F2RL1/CHMP1A/SH2B3/LOC100520680	10	BP
GO:1901699	cellular response to nitrogen compound	11/253	162/6899	0.0354288	0.0354288	0.320045	SLC2A8/KCNE1/GPER1/MZB1/ATP2B1/P2RX7/ZDHHC7/JAK3/PPARG/AOC1/SESN3	11	BP
GO:0034220	ion transmembrane transport	15/253	246/6899	0.0363394	0.0363394	0.326787	KCNE1/GPER1/STIM1/SLC35G1/SLC43A2/P2RX7/KCNK5/KCNG1/SLC5A1/LRRC8A/SLC37A2/KCNJ13/LRRC8B/TCN2/ATP7A	15	BP
GO:0006816	calcium ion transport	8/253	104/6899	0.0365963	0.0365963	0.327614	GPER1/STIM1/SLC35G1/ATP2B1/VDR/P2RX7/CD84/SPINK1	8	BP
GO:0030203	glycosaminoglycan metabolic process	4/253	35/6899	0.0379243	0.0379243	0.334108	GLCE/HYAL1/HYAL2/PXYLP1	4	BP
GO:0045834	positive regulation of lipid metabolic process	4/253	35/6899	0.0379243	0.0379243	0.334108	SCT/MFSD2A/SREBF1/PPARG	4	BP
GO:0046903	secretion	16/253	269/6899	0.0379869	0.0379869	0.334108	PDX1/GPER1/SCT/P2RY2/SIDT2/VDR/C2CD2L/F2RL1/P2RX7/FURIN/LRRC8A/CD84/PPARG/PTGES/GIP/SCAMP1	16	BP
GO:0007160	cell-matrix adhesion	5/253	51/6899	0.0379942	0.0379942	0.334108	VTN/RHOD/ITGB7/EPHA1/ITGB8	5	BP
GO:0006940	regulation of smooth muscle contraction	3/253	21/6899	0.0397881	0.0397881	0.340022	GPER1/ATP2B1/ORMDL3	3	BP
GO:0021766	hippocampus development	3/253	21/6899	0.0397881	0.0397881	0.340022	SCT/TSKU/MFSD2A	3	BP
GO:0032757	positive regulation of interleukin-8 production	3/253	21/6899	0.0397881	0.0397881	0.340022	F2RL1/CD244/HYAL2	3	BP
GO:0043407	negative regulation of MAP kinase activity	3/253	21/6899	0.0397881	0.0397881	0.340022	RGS14/SH2B3/HYAL2	3	BP
GO:0046889	positive regulation of lipid biosynthetic process	3/253	21/6899	0.0397881	0.0397881	0.340022	MFSD2A/SREBF1/PPARG	3	BP
GO:1904427	positive regulation of calcium ion transmembrane transport	3/253	21/6899	0.0397881	0.0397881	0.340022	GPER1/STIM1/P2RX7	3	BP
GO:0006874	cellular calcium ion homeostasis	7/253	87/6899	0.0398644	0.0398644	0.340022	GPER1/STIM1/SLC35G1/ATP2B1/VDR/P2RX7/EDN3	7	BP
GO:0002699	positive regulation of immune effector process	6/253	69/6899	0.0400966	0.0400966	0.340542	MZB1/F2RL1/P2RX7/SASH3/CD84/CD244	6	BP
GO:0006109	regulation of carbohydrate metabolic process	5/253	52/6899	0.0408284	0.0408284	0.343904	GPER1/P2RX7/FAM3C/TFF3/CD244	5	BP
GO:0009968	negative regulation of signal transduction	20/253	360/6899	0.0408386	0.0408386	0.343904	PDX1/GPER1/TSKU/PVRIG/RGS14/CASTOR2/F2RL1/P2RX7/SEMA6A/PTTG1IP/MESP1/SLC35F6/SH2B3/SPINK1/RNF157/NRARP/HYAL2/TNFAIP1/SESN3/ADM	20	BP
GO:0042180	cellular ketone metabolic process	6/253	70/6899	0.0425667	0.0425667	0.355444	MFSD2A/APOC3/HAGHL/KDSR/PPARG/GIP	6	BP
GO:0042445	hormone metabolic process	6/253	70/6899	0.0425667	0.0425667	0.355444	CYP1A1/FURIN/RETSAT/IYD/LRAT/LOC100624541	6	BP
GO:0048585	negative regulation of response to stimulus	24/253	453/6899	0.0427663	0.0427663	0.355617	PDX1/GPER1/TSKU/PVRIG/RGS14/CASTOR2/F2RL1/P2RX7/SEMA6A/PTTG1IP/MESP1/CD46/CD84/SLC35F6/PPARG/RNF26/SH2B3/SPINK1/RNF157/NRARP/HYAL2/TNFAIP1/SESN3/ADM	24	BP
GO:0002720	positive regulation of cytokine production involved in immune response	3/253	22/6899	0.0448596	0.0448596	0.366883	F2RL1/P2RX7/SASH3	3	BP
GO:0046148	pigment biosynthetic process	3/253	22/6899	0.0448596	0.0448596	0.366883	MFSD12/ATP7A/PGRMC1	3	BP
GO:0050891	multicellular organismal water homeostasis	3/253	22/6899	0.0448596	0.0448596	0.366883	AQP7/CLDN4/UGCG	3	BP
GO:0050994	regulation of lipid catabolic process	3/253	22/6899	0.0448596	0.0448596	0.366883	SCT/MFSD2A/APOC3	3	BP
GO:0002687	positive regulation of leukocyte migration	4/253	37/6899	0.0452184	0.0452184	0.367813	F2RL1/CCL5/NEDD9/CD99L2	4	BP
GO:1901135	carbohydrate derivative metabolic process	21/253	387/6899	0.0453435	0.0453435	0.367813	B4GALT1/ST6GALNAC4/LOC100513844/PGAP3/PIGV/GPD1/P2RX7/ELOVL1/PMM1/UGCG/MAN1A2/B3GALT4/LOC100624541/B3GNT8/GPAT3/GAL3ST1/GLCE/HYAL1/HYAL2/PFKFB4/PXYLP1	21	BP
GO:0098655	cation transmembrane transport	12/253	190/6899	0.0461826	0.0461826	0.370855	KCNE1/GPER1/STIM1/SLC35G1/SLC43A2/P2RX7/KCNK5/KCNG1/SLC5A1/KCNJ13/TCN2/ATP7A	12	BP
GO:0055074	calcium ion homeostasis	7/253	90/6899	0.046536	0.046536	0.370855	GPER1/STIM1/SLC35G1/ATP2B1/VDR/P2RX7/EDN3	7	BP
GO:0002700	regulation of production of molecular mediator of immune response	5/253	54/6899	0.0468724	0.0468724	0.370855	MZB1/F2RL1/P2RX7/SASH3/CD244	5	BP
GO:0030334	regulation of cell migration	14/253	233/6899	0.0468747	0.0468747	0.370855	GPER1/HBEGF/ABHD2/CLDN4/RHOD/F2RL1/SEMA6A/PIK3CD/CCL5/NEDD9/HYAL1/EPHA1/HYAL2/CD99L2	14	BP
GO:0051240	positive regulation of multicellular organismal process	23/253	436/6899	0.0486792	0.0486792	0.370855	GPER1/SCT/TSKU/ATP2B1/P2RY2/VDR/F2RL1/P2RX7/FURIN/MESP1/PIK3CD/EREG/SASH3/NEDD9/CD84/CD244/CD101/HYAL1/ZFYVE27/EPHA1/HYAL2/FRMD8/ADM	23	BP
GO:0006631	fatty acid metabolic process	9/253	130/6899	0.0489023	0.0489023	0.370855	CYP1A1/ABHD2/MFSD2A/APOC3/ELOVL1/PPARG/EPHX1/PTGES/GIP	9	BP
GO:0043434	response to peptide hormone	7/253	91/6899	0.0489095	0.0489095	0.370855	SLC2A8/GPER1/MZB1/ATP2B1/ZDHHC7/JAK3/PPARG	7	BP
GO:0007586	digestion	4/253	38/6899	0.0491389	0.0491389	0.370855	SCT/VDR/UGCG/CCK	4	BP
GO:0010565	regulation of cellular ketone metabolic process	4/253	38/6899	0.0491389	0.0491389	0.370855	MFSD2A/APOC3/PPARG/GIP	4	BP
GO:0043269	regulation of ion transport	11/253	171/6899	0.0492317	0.0492317	0.370855	KCNE1/GPER1/STIM1/ATP2B1/SLC43A2/P2RX7/KCNG1/KCNJ13/CD84/SPINK1/PTGES	11	BP
GO:0098662	inorganic cation transmembrane transport	11/253	171/6899	0.0492317	0.0492317	0.370855	KCNE1/GPER1/STIM1/SLC35G1/P2RX7/KCNK5/KCNG1/SLC5A1/KCNJ13/TCN2/ATP7A	11	BP
GO:0002043	blood vessel endothelial cell proliferation involved in sprouting angiogenesis	2/253	10/6899	0.0496373	0.0496373	0.370855	PPP1R16B/NRARP	2	BP
GO:0007176	regulation of epidermal growth factor-activated receptor activity	2/253	10/6899	0.0496373	0.0496373	0.370855	HBEGF/EREG	2	BP
GO:0009268	response to pH	2/253	10/6899	0.0496373	0.0496373	0.370855	HYAL1/AQP10	2	BP
GO:0010874	regulation of cholesterol efflux	2/253	10/6899	0.0496373	0.0496373	0.370855	APOA1/PPARG	2	BP
GO:0033561	regulation of water loss via skin	2/253	10/6899	0.0496373	0.0496373	0.370855	CLDN4/UGCG	2	BP
GO:0042438	melanin biosynthetic process	2/253	10/6899	0.0496373	0.0496373	0.370855	MFSD12/ATP7A	2	BP
GO:0043300	regulation of leukocyte degranulation	2/253	10/6899	0.0496373	0.0496373	0.370855	F2RL1/CD84	2	BP
GO:0051180	vitamin transport	2/253	10/6899	0.0496373	0.0496373	0.370855	SLC52A2/TCN2	2	BP
GO:0051482	positive regulation of cytosolic calcium ion concentration involved in phospholipase C-activating G protein-coupled signaling pathway	2/253	10/6899	0.0496373	0.0496373	0.370855	GPR55/F2RL1	2	BP
GO:0051923	sulfation	2/253	10/6899	0.0496373	0.0496373	0.370855	TPST2/LOC100624541	2	BP
GO:0031984	organelle subcompartment	39/317	459/7848	6.78479e-06	6.78479e-06	0.00160692	CYP1A1/CYP3A29/GPER1/B4GALT1/STIM1/SLC35G1/LPGAT1/LOC100513844/SREBF1/PIGV/SCAMP2/CYP3A46/SPPL2B/C2CD2L/FURIN/RETSAT/ELOVL1/SCAMP5/CREB3L2/SLC37A2/TMEM115/MOGAT2/SCAMP4/RNF26/DGAT1/GPAT3/ZDHHC9/ATP7A/POR/ZFYVE27/EPHX1/PGRMC1/ABCB9/RCE1/TMEM170A/CYB5A/SGMS2/SCAMP1/SIGMAR1	39	CC
GO:0031226	intrinsic component of plasma membrane	37/317	450/7848	2.48237e-05	2.48237e-05	0.00179389	SLC2A8/SLC16A9/KCNE1/TSPAN1/HBEGF/AQP7/MFSD2A/ATP2B1/LOC106507519/EFNA1/CLDN4/ENPP7/SLC6A19/SLC52A2/ATP1B3/GPR55/F2RL1/P2RX7/ACVR1B/SEMA6A/KCNK5/KCNG1/IYD/LRRC8A/SLC6A8/CD82/ITGB7/SLC16A1/TSPAN17/EPHA1/HYAL2/ITGB8/SLC28A1/SGMS2/GPA33/TMC5/AQP10	37	CC
GO:0000323	lytic vacuole	19/317	167/7848	4.03717e-05	4.03717e-05	0.00179389	TM4SF5/SLC29A3/CYBRD1/SIDT2/CDIP1/CTSZ/SPPL2B/RNASET2/LRRC8A/CHMP1A/MFSD12/SLC35F6/CTSD/GLMP/HYAL1/HYAL2/ABCB9/PPT2/OSTM1	19	CC
GO:0005764	lysosome	19/317	167/7848	4.03717e-05	4.03717e-05	0.00179389	TM4SF5/SLC29A3/CYBRD1/SIDT2/CDIP1/CTSZ/SPPL2B/RNASET2/LRRC8A/CHMP1A/MFSD12/SLC35F6/CTSD/GLMP/HYAL1/HYAL2/ABCB9/PPT2/OSTM1	19	CC
GO:0005887	integral component of plasma membrane	35/317	426/7848	4.24494e-05	4.24494e-05	0.00179389	SLC2A8/SLC16A9/KCNE1/TSPAN1/HBEGF/AQP7/MFSD2A/ATP2B1/LOC106507519/CLDN4/ENPP7/SLC6A19/SLC52A2/ATP1B3/GPR55/F2RL1/P2RX7/ACVR1B/SEMA6A/KCNK5/KCNG1/IYD/LRRC8A/SLC6A8/CD82/ITGB7/SLC16A1/TSPAN17/EPHA1/ITGB8/SLC28A1/SGMS2/GPA33/TMC5/AQP10	35	CC
GO:0005765	lysosomal membrane	12/317	77/7848	5.30194e-05	5.30194e-05	0.00179389	TM4SF5/SLC29A3/CYBRD1/SIDT2/CDIP1/SPPL2B/LRRC8A/CHMP1A/SLC35F6/GLMP/ABCB9/OSTM1	12	CC
GO:0098852	lytic vacuole membrane	12/317	77/7848	5.30194e-05	5.30194e-05	0.00179389	TM4SF5/SLC29A3/CYBRD1/SIDT2/CDIP1/SPPL2B/LRRC8A/CHMP1A/SLC35F6/GLMP/ABCB9/OSTM1	12	CC
GO:0005773	vacuole	20/317	200/7848	0.000157682	0.000157682	0.00421846	TM4SF5/SLC29A3/CYBRD1/SIDT2/CDIP1/CTSZ/SPPL2B/RNASET2/LRRC8A/CHMP1A/MFSD12/SLC35F6/CTSD/GLMP/HYAL1/HYAL2/ABCB9/PPT2/OSTM1/ATP6V0A1	20	CC
GO:0005774	vacuolar membrane	13/317	99/7848	0.000160302	0.000160302	0.00421846	TM4SF5/SLC29A3/CYBRD1/SIDT2/CDIP1/SPPL2B/LRRC8A/CHMP1A/SLC35F6/GLMP/ABCB9/OSTM1/ATP6V0A1	13	CC
GO:0098827	endoplasmic reticulum subcompartment	29/317	360/7848	0.000277928	0.000277928	0.00658251	CYP1A1/CYP3A29/STIM1/SLC35G1/LPGAT1/SREBF1/PIGV/CYP3A46/SPPL2B/C2CD2L/RETSAT/ELOVL1/CREB3L2/SLC37A2/MOGAT2/RNF26/DGAT1/GPAT3/ZDHHC9/POR/ZFYVE27/EPHX1/PGRMC1/ABCB9/RCE1/TMEM170A/CYB5A/SGMS2/SIGMAR1	29	CC
GO:0005789	endoplasmic reticulum membrane	28/317	356/7848	0.000521651	0.000521651	0.0108975	CYP1A1/CYP3A29/STIM1/SLC35G1/LPGAT1/SREBF1/PIGV/CYP3A46/SPPL2B/RETSAT/ELOVL1/CREB3L2/SLC37A2/MOGAT2/RNF26/DGAT1/GPAT3/ZDHHC9/POR/ZFYVE27/EPHX1/PGRMC1/ABCB9/RCE1/TMEM170A/CYB5A/SGMS2/SIGMAR1	28	CC
GO:0042175	nuclear outer membrane-endoplasmic reticulum membrane network	28/317	358/7848	0.00057035	0.00057035	0.0108975	CYP1A1/CYP3A29/STIM1/SLC35G1/LPGAT1/SREBF1/PIGV/CYP3A46/SPPL2B/RETSAT/ELOVL1/CREB3L2/SLC37A2/MOGAT2/RNF26/DGAT1/GPAT3/ZDHHC9/POR/ZFYVE27/EPHX1/PGRMC1/ABCB9/RCE1/TMEM170A/CYB5A/SGMS2/SIGMAR1	28	CC
GO:0005794	Golgi apparatus	34/317	469/7848	0.000598154	0.000598154	0.0108975	GPER1/B4GALT1/ENPP7/ST6GALNAC4/LOC100513844/PGAP3/SREBF1/SCAMP2/RNF128/GLYCTK/C2H11orf24/FURIN/TPST2/CDIPT/UGCG/SCAMP5/SLC35A4/MAN1A2/FAM3C/B3GALT4/TMEM115/SCAMP4/ZDHHC7/B3GNT8/LOC100152566/ZDHHC9/GLCE/ATP7A/NUCB1/CDH1/CPE/SGMS2/SCAMP1/PXYLP1	34	CC
GO:0055038	recycling endosome membrane	5/317	19/7848	0.000758644	0.000758644	0.0128342	SCAMP2/SCAMP5/SCAMP4/ZFYVE27/SCAMP1	5	CC
GO:0032588	trans-Golgi network membrane	4/317	14/7848	0.00189519	0.00189519	0.0299241	SCAMP2/SCAMP5/SCAMP4/SCAMP1	4	CC
GO:0031300	intrinsic component of organelle membrane	14/317	145/7848	0.00211126	0.00211126	0.0312522	STIM1/ATP2B1/SPPL2B/P2RX7/FURIN/PISD/SLC35A4/LRRC8A/SLC37A2/ZDHHC9/ZFYVE27/ABCB9/RCE1/SGMS2	14	CC
GO:0005768	endosome	21/317	273/7848	0.00336514	0.00336514	0.0468827	GPER1/CDIP1/SCAMP2/TMEM184A/RNF128/SPPL2B/F2RL1/SCAMP5/SLC5A1/STARD3/CHMP1A/SCAMP4/MFSD12/ITGB7/ATP7A/RNF157/SFTPD/ZFYVE27/ITGB8/TNFAIP1/SCAMP1	21	CC
GO:0031301	integral component of organelle membrane	13/317	138/7848	0.00373105	0.00373105	0.0490928	STIM1/ATP2B1/SPPL2B/P2RX7/FURIN/PISD/SLC35A4/LRRC8A/SLC37A2/ZFYVE27/ABCB9/RCE1/SGMS2	13	CC
GO:0016323	basolateral plasma membrane	7/317	54/7848	0.00568319	0.00568319	0.0708431	SCARB1/AQP7/B4GALT1/SLC40A1/ATP2B1/ATP7A/AQP10	7	CC
GO:0031228	intrinsic component of Golgi membrane	4/317	21/7848	0.00906549	0.00906549	0.107354	FURIN/SLC35A4/ZDHHC9/SGMS2	4	CC
GO:0098791	Golgi apparatus subcompartment	10/317	105/7848	0.00967536	0.00967536	0.109121	GPER1/B4GALT1/LOC100513844/SCAMP2/FURIN/SCAMP5/TMEM115/SCAMP4/ATP7A/SCAMP1	10	CC
GO:0009925	basal plasma membrane	7/317	61/7848	0.0110192	0.0110192	0.118627	SCARB1/AQP7/B4GALT1/SLC40A1/ATP2B1/ATP7A/AQP10	7	CC
GO:0000139	Golgi membrane	13/317	159/7848	0.0119802	0.0119802	0.123366	B4GALT1/PGAP3/SREBF1/FURIN/TPST2/UGCG/SLC35A4/MAN1A2/B3GALT4/B3GNT8/LOC100152566/ZDHHC9/SGMS2	13	CC
GO:0030659	cytoplasmic vesicle membrane	17/317	232/7848	0.0126089	0.0126089	0.123662	GPER1/DMBT1/ATP2B1/SREBF1/CDIP1/SCAMP2/TMEM184A/SPPL2B/IYD/SCAMP5/CD46/STARD3/CHMP1A/SCAMP4/ZFYVE27/CPE/SCAMP1	17	CC
GO:0030176	integral component of endoplasmic reticulum membrane	7/317	63/7848	0.0130532	0.0130532	0.123662	STIM1/SPPL2B/SLC37A2/ZFYVE27/ABCB9/RCE1/SGMS2	7	CC
GO:0055037	recycling endosome	6/317	50/7848	0.014735	0.014735	0.125314	GPER1/SCAMP2/SCAMP5/SCAMP4/ZFYVE27/SCAMP1	6	CC
GO:0012506	vesicle membrane	17/317	237/7848	0.0153111	0.0153111	0.125314	GPER1/DMBT1/ATP2B1/SREBF1/CDIP1/SCAMP2/TMEM184A/SPPL2B/IYD/SCAMP5/CD46/STARD3/CHMP1A/SCAMP4/ZFYVE27/CPE/SCAMP1	17	CC
GO:0031227	intrinsic component of endoplasmic reticulum membrane	7/317	65/7848	0.015344	0.015344	0.125314	STIM1/SPPL2B/SLC37A2/ZFYVE27/ABCB9/RCE1/SGMS2	7	CC
GO:0045178	basal part of cell	7/317	65/7848	0.015344	0.015344	0.125314	SCARB1/AQP7/B4GALT1/SLC40A1/ATP2B1/ATP7A/AQP10	7	CC
GO:0010008	endosome membrane	10/317	117/7848	0.0196216	0.0196216	0.154907	CDIP1/SCAMP2/TMEM184A/SPPL2B/SCAMP5/STARD3/CHMP1A/SCAMP4/ZFYVE27/SCAMP1	10	CC
GO:0005802	trans-Golgi network	7/317	72/7848	0.0256043	0.0256043	0.195618	GPER1/SCAMP2/FURIN/SCAMP5/SCAMP4/ATP7A/SCAMP1	7	CC
GO:0005770	late endosome	7/317	77/7848	0.0353054	0.0353054	0.261306	CDIP1/RNF128/STARD3/CHMP1A/MFSD12/ATP7A/SFTPD	7	CC
GO:0030658	transport vesicle membrane	5/317	47/7848	0.0399608	0.0399608	0.2868	DMBT1/ATP2B1/SREBF1/CPE/SCAMP1	5	CC
GO:0016324	apical plasma membrane	7/317	81/7848	0.0446229	0.0446229	0.294241	KCNE1/SCARB1/CYBRD1/C2CD2L/SLC5A1/OCEL1/HYAL2	7	CC
GO:0030173	integral component of Golgi membrane	3/317	20/7848	0.0447247	0.0447247	0.294241	FURIN/SLC35A4/SGMS2	3	CC
GO:0030667	secretory granule membrane	3/317	20/7848	0.0447247	0.0447247	0.294241	DMBT1/CD46/SCAMP1	3	CC
GO:0022857	transmembrane transporter activity	51/256	489/7135	1.62186e-12	1.62186e-12	5.24118e-10	SLC2A8/SLC16A9/KCNE1/AQP8/SLC5A10/SLC29A3/CYBRD1/AQP7/TMEM37/MFSD2A/SLC40A1/ATP2B1/ANKH/SLC2A6/SLC5A4/SIDT2/SLC13A2/SLC6A19/SLC43A2/SLC52A2/SLC30A10/SLC39A5/ABCA1/P2RX7/KCNK5/SLC16A5/KCNG1/SLC19A3/SLC35A4/SLC23A2/SLC5A1/LRRC8A/SLC11A2/TMEM63B/SLC37A2/KCNJ13/MFSD12/SLC35F6/SLC6A8/SLC16A1/ATP7A/ABCA3/MFSD5/SLC28A1/SLC9A2/ABCB9/GJB1/TMC5/ATP6V0A1/SLC5A12/AQP10	51	MF
GO:0015075	ion transmembrane transporter activity	33/256	351/7135	2.76538e-07	2.76538e-07	4.46827e-05	SLC2A8/SLC16A9/KCNE1/TMEM37/MFSD2A/SLC40A1/ATP2B1/ANKH/SLC5A4/SLC52A2/SLC30A10/SLC39A5/P2RX7/KCNK5/KCNG1/SLC19A3/SLC23A2/SLC5A1/LRRC8A/SLC11A2/TMEM63B/SLC37A2/KCNJ13/MFSD12/SLC6A8/SLC16A1/ATP7A/MFSD5/SLC28A1/SLC9A2/TMC5/ATP6V0A1/SLC5A12	33	MF
GO:0022804	active transmembrane transporter activity	18/256	153/7135	8.05728e-06	8.05728e-06	0.000778536	CYBRD1/MFSD2A/ATP2B1/SLC5A4/SLC6A19/ABCA1/SLC23A2/SLC5A1/SLC37A2/MFSD12/SLC6A8/ATP7A/ABCA3/SLC28A1/SLC9A2/ABCB9/ATP6V0A1/SLC5A12	18	MF
GO:0015144	carbohydrate transmembrane transporter activity	6/256	16/7135	1.19032e-05	1.19032e-05	0.000778536	SLC2A8/AQP7/SLC5A4/SLC23A2/SLC5A1/AQP10	6	MF
GO:0015318	inorganic molecular entity transmembrane transporter activity	27/256	307/7135	1.27618e-05	1.27618e-05	0.000778536	KCNE1/AQP7/TMEM37/MFSD2A/SLC40A1/ATP2B1/ANKH/SLC5A4/SLC39A5/P2RX7/KCNK5/KCNG1/SLC23A2/SLC5A1/LRRC8A/SLC11A2/TMEM63B/SLC37A2/KCNJ13/SLC6A8/ATP7A/MFSD5/SLC28A1/SLC9A2/TMC5/ATP6V0A1/AQP10	27	MF
GO:1901505	carbohydrate derivative transmembrane transporter activity	7/256	24/7135	1.44549e-05	1.44549e-05	0.000778536	SLC29A3/MFSD2A/SLC35A4/SLC5A1/LRRC8A/SLC37A2/SLC28A1	7	MF
GO:0008514	organic anion transmembrane transporter activity	10/256	56/7135	2.45874e-05	2.45874e-05	0.00112201	SLC2A8/SLC16A9/MFSD2A/SLC52A2/SLC23A2/LRRC8A/MFSD12/SLC6A8/SLC16A1/SLC5A12	10	MF
GO:0008324	cation transmembrane transporter activity	24/256	267/7135	2.77761e-05	2.77761e-05	0.00112201	SLC16A9/KCNE1/TMEM37/MFSD2A/SLC40A1/ATP2B1/SLC5A4/SLC30A10/SLC39A5/P2RX7/KCNK5/KCNG1/SLC19A3/SLC23A2/SLC5A1/SLC11A2/TMEM63B/KCNJ13/MFSD12/SLC6A8/ATP7A/SLC28A1/SLC9A2/ATP6V0A1	24	MF
GO:0015293	symporter activity	9/256	51/7135	6.94782e-05	6.94782e-05	0.00241947	MFSD2A/SLC5A4/SLC6A19/SLC23A2/SLC5A1/MFSD12/SLC6A8/SLC28A1/SLC5A12	9	MF
GO:0046873	metal ion transmembrane transporter activity	17/256	164/7135	7.48696e-05	7.48696e-05	0.00241947	KCNE1/TMEM37/MFSD2A/SLC40A1/ATP2B1/SLC5A4/SLC39A5/KCNK5/KCNG1/SLC23A2/SLC5A1/SLC11A2/KCNJ13/SLC6A8/ATP7A/SLC28A1/SLC9A2	17	MF
GO:0008509	anion transmembrane transporter activity	13/256	111/7135	0.000156619	0.000156619	0.00460116	SLC2A8/SLC16A9/MFSD2A/ANKH/SLC52A2/SLC23A2/LRRC8A/SLC37A2/MFSD12/SLC6A8/SLC16A1/MFSD5/SLC5A12	13	MF
GO:0008374	O-acyltransferase activity	6/256	27/7135	0.000315411	0.000315411	0.00744241	AGPAT2/LRAT/MOGAT2/DGAT1/GPAT3/MBOAT7	6	MF
GO:0015370	solute:sodium symporter activity	6/256	27/7135	0.000315411	0.000315411	0.00744241	MFSD2A/SLC5A4/SLC23A2/SLC5A1/SLC6A8/SLC28A1	6	MF
GO:0015291	secondary active transmembrane transporter activity	11/256	90/7135	0.000345012	0.000345012	0.00744241	MFSD2A/SLC5A4/SLC6A19/SLC23A2/SLC5A1/SLC37A2/MFSD12/SLC6A8/SLC28A1/SLC9A2/SLC5A12	11	MF
GO:0022890	inorganic cation transmembrane transporter activity	20/256	239/7135	0.000345454	0.000345454	0.00744241	KCNE1/TMEM37/MFSD2A/SLC40A1/ATP2B1/SLC5A4/SLC39A5/P2RX7/KCNK5/KCNG1/SLC23A2/SLC5A1/SLC11A2/TMEM63B/KCNJ13/SLC6A8/ATP7A/SLC28A1/SLC9A2/ATP6V0A1	20	MF
GO:0090482	vitamin transmembrane transporter activity	4/256	11/7135	0.000437672	0.000437672	0.00883982	SLC2A8/SLC52A2/SLC19A3/SLC23A2	4	MF
GO:0046943	carboxylic acid transmembrane transporter activity	8/256	52/7135	0.000470613	0.000470613	0.00894601	SLC16A9/MFSD2A/SLC43A2/SLC16A5/SLC23A2/MFSD12/SLC16A1/SLC5A12	8	MF
GO:0005342	organic acid transmembrane transporter activity	8/256	53/7135	0.000537379	0.000537379	0.00964768	SLC16A9/MFSD2A/SLC43A2/SLC16A5/SLC23A2/MFSD12/SLC16A1/SLC5A12	8	MF
GO:0015932	nucleobase-containing compound transmembrane transporter activity	5/256	21/7135	0.000725493	0.000725493	0.0123394	SLC29A3/SIDT2/SLC35A4/LRRC8A/SLC28A1	5	MF
GO:0008028	monocarboxylic acid transmembrane transporter activity	5/256	22/7135	0.000911677	0.000911677	0.0147308	SLC16A9/MFSD2A/SLC16A5/SLC16A1/SLC5A12	5	MF
GO:0022853	active ion transmembrane transporter activity	11/256	103/7135	0.00109666	0.00109666	0.0168759	MFSD2A/ATP2B1/SLC5A4/SLC23A2/SLC5A1/SLC37A2/SLC6A8/ATP7A/SLC28A1/SLC9A2/ATP6V0A1	11	MF
GO:0120013	lipid transfer activity	4/256	14/7135	0.00121912	0.00121912	0.0179076	GLTPD2/C2CD2L/STARD3/CPTP	4	MF
GO:0016746	acyltransferase activity	12/256	122/7135	0.00136597	0.00136597	0.0187749	LPGAT1/AGPAT2/ELOVL1/LRAT/GGT1/MOGAT2/ZDHHC7/DGAT1/GPAT3/ZDHHC9/CBLC/MBOAT7	12	MF
GO:0008194	UDP-glycosyltransferase activity	8/256	61/7135	0.00139436	0.00139436	0.0187749	B4GALT1/UGCG/B3GALT4/B3GNT8/LOC100152566/UGT1A6/HYAL1/UGT8	8	MF
GO:0015294	solute:cation symporter activity	6/256	38/7135	0.00211355	0.00211355	0.0262773	MFSD2A/SLC5A4/SLC23A2/SLC5A1/SLC6A8/SLC28A1	6	MF
GO:0015081	sodium ion transmembrane transporter activity	7/256	51/7135	0.00211417	0.00211417	0.0262773	MFSD2A/SLC5A4/SLC23A2/SLC5A1/SLC6A8/SLC28A1/SLC9A2	7	MF
GO:0016757	glycosyltransferase activity	12/256	131/7135	0.0025109	0.0025109	0.0300525	B4GALT1/ST6GALNAC4/LOC100513844/PIGV/UGCG/B3GALT4/B3GNT8/LOC100152566/UGT1A6/HYAL1/MGAT4A/UGT8	12	MF
GO:0042626	ATPase-coupled transmembrane transporter activity	6/256	41/7135	0.00314693	0.00314693	0.0363198	ATP2B1/ABCA1/ATP7A/ABCA3/ABCB9/ATP6V0A1	6	MF
GO:0016758	hexosyltransferase activity	9/256	86/7135	0.00352335	0.00352335	0.039262	B4GALT1/LOC100513844/PIGV/UGCG/B3GALT4/B3GNT8/LOC100152566/UGT1A6/HYAL1	9	MF
GO:0005372	water transmembrane transporter activity	3/256	10/7135	0.00454203	0.00454203	0.0489264	AQP7/SLC5A1/AQP10	3	MF
GO:1901618	organic hydroxy compound transmembrane transporter activity	4/256	20/7135	0.00498036	0.00498036	0.0512077	AQP7/SLC16A1/SLC5A12/AQP10	4	MF
GO:0016491	oxidoreductase activity	24/256	382/7135	0.00507073	0.00507073	0.0512077	CYP1A1/BCO1/CYP3A29/CYBRD1/ADH4/CYP2C42/FRRS1/CYP3A46/GPD1/HSD17B2/RETSAT/IYD/MSRB1/KDSR/SPR/OGFOD3/GLRX/GSTK1/POR/PTGES/AOC1/IL4I1/SESN3/ALDH3B1	24	MF
GO:0005319	lipid transporter activity	6/256	47/7135	0.00628391	0.00628391	0.061138	GLTPD2/MFSD2A/APOB/C2CD2L/STARD3/CPTP	6	MF
GO:0015399	primary active transmembrane transporter activity	7/256	62/7135	0.00643243	0.00643243	0.061138	CYBRD1/ATP2B1/ABCA1/ATP7A/ABCA3/ABCB9/ATP6V0A1	7	MF
GO:0004175	endopeptidase activity	14/256	188/7135	0.00750708	0.00750708	0.0693135	F10/TLL2/DMBT1/GZMH/CASP10/CTSZ/SPPL2B/FURIN/PRSS8/BACE2/MME/CD46/CTSD/RCE1	14	MF
GO:0140359	ABC-type transporter activity	3/256	12/7135	0.00789551	0.00789551	0.0708749	ABCA1/ABCA3/ABCB9	3	MF
GO:0008233	peptidase activity	19/256	294/7135	0.00914593	0.00914593	0.0798806	F10/TLL2/DMBT1/FOLH1B/GZMH/CASP10/CTSZ/SPPL2B/FURIN/PRSS8/USP2/BACE2/MME/CD46/GGT1/IHH/CTSD/RCE1/CPE	19	MF
GO:0016747	acyltransferase activity, transferring groups other than amino-acyl groups	9/256	101/7135	0.0100619	0.0100619	0.0855681	AGPAT2/ELOVL1/LRAT/MOGAT2/ZDHHC7/DGAT1/GPAT3/ZDHHC9/MBOAT7	9	MF
GO:0042887	amide transmembrane transporter activity	3/256	15/7135	0.0150822	0.0150822	0.124972	AQP7/ABCB9/AQP10	3	MF
GO:0005496	steroid binding	5/256	42/7135	0.016451	0.016451	0.132784	GPER1/VDR/S100G/STARD3/PGRMC1	5	MF
GO:0004190	aspartic-type endopeptidase activity	3/256	16/7135	0.0180794	0.0180794	0.132784	SPPL2B/BACE2/CTSD	3	MF
GO:0015605	organophosphate ester transmembrane transporter activity	3/256	16/7135	0.0180794	0.0180794	0.132784	MFSD2A/LRRC8A/SLC37A2	3	MF
GO:0016712	oxidoreductase activity, acting on paired donors, with incorporation or reduction of molecular oxygen, reduced flavin or flavoprotein as one donor, and incorporation of one atom of oxygen	3/256	16/7135	0.0180794	0.0180794	0.132784	CYP1A1/CYP3A29/CYP3A46	3	MF
GO:0070001	aspartic-type peptidase activity	3/256	16/7135	0.0180794	0.0180794	0.132784	SPPL2B/BACE2/CTSD	3	MF
GO:0038024	cargo receptor activity	4/256	30/7135	0.0212963	0.0212963	0.148203	DMBT1/SCARB1/VTN/TEX261	4	MF
GO:0004180	carboxypeptidase activity	3/256	17/7135	0.021383	0.021383	0.148203	FOLH1B/CTSZ/CPE	3	MF
GO:0015267	channel activity	13/256	194/7135	0.0220133	0.0220133	0.148203	KCNE1/AQP8/AQP7/TMEM37/P2RX7/KCNK5/KCNG1/LRRC8A/TMEM63B/KCNJ13/GJB1/TMC5/AQP10	13	MF
GO:0022803	passive transmembrane transporter activity	13/256	194/7135	0.0220133	0.0220133	0.148203	KCNE1/AQP8/AQP7/TMEM37/P2RX7/KCNK5/KCNG1/LRRC8A/TMEM63B/KCNJ13/GJB1/TMC5/AQP10	13	MF
GO:0042562	hormone binding	4/256	34/7135	0.0322572	0.0322572	0.209141	GPER1/ABHD2/SLC40A1/C2CD2L	4	MF
GO:0005539	glycosaminoglycan binding	6/256	67/7135	0.0323589	0.0323589	0.209141	HBEGF/VTN/FURIN/LOC100520680/HYAL2/AOC1	6	MF
GO:0005044	scavenger receptor activity	3/256	20/7135	0.0331351	0.0331351	0.209958	DMBT1/SCARB1/VTN	3	MF
GO:0046906	tetrapyrrole binding	7/256	86/7135	0.0341952	0.0341952	0.212509	CYP1A1/CYP3A29/CYP2C42/CYP3A46/TCN2/PGRMC1/CYB5A	7	MF
GO:0008201	heparin binding	5/256	53/7135	0.0404852	0.0404852	0.246851	HBEGF/VTN/FURIN/LOC100520680/AOC1	5	MF
GO:0004181	metallocarboxypeptidase activity	2/256	10/7135	0.0477165	0.0477165	0.270526	FOLH1B/CPE	2	MF
GO:0010181	FMN binding	2/256	10/7135	0.0477165	0.0477165	0.270526	IYD/POR	2	MF
GO:0015929	hexosaminidase activity	2/256	10/7135	0.0477165	0.0477165	0.270526	HYAL1/HYAL2	2	MF
GO:0140358	P-type transmembrane transporter activity	2/256	10/7135	0.0477165	0.0477165	0.270526	ATP2B1/ATP7A	2	MF

## Sheet: Down-regulated genes enriched
ID	Description	GeneRatio	BgRatio	pvalue	p.adjust	qvalue	geneID	Count	Ont
GO:0007059	chromosome segregation	14/108	104/6899	5.57102e-10	5.57102e-10	6.8201e-07	CENPH/TOP2A/KIF22/RMI1/MAD2L1/DLGAP5/PTTG1/KIF4A/HJURP/BRCA1/EME1/CCNB1/NUF2/ZWINT	14	BP
GO:1903047	mitotic cell cycle process	17/108	204/6899	1.33531e-08	1.33531e-08	8.17347e-06	CENPH/KIF22/MAD2L1/DCUN1D3/GINS3/DLGAP5/PTTG1/KIF4A/BRCA1/EME1/CCNB1/CHEK1/KIF20B/NUF2/IQGAP3/ZWINT/E2F7	17	BP
GO:0022402	cell cycle process	21/108	340/6899	4.59984e-08	4.59984e-08	1.87706e-05	CENPH/TOP2A/KIF22/RMI1/MAD2L1/DCUN1D3/GINS3/DLGAP5/PTTG1/KIF4A/BRCA1/EME1/CDC20/CCNB1/CHEK1/KIF20B/NUF2/IQGAP3/ZWINT/E2F7/CEP152	21	BP
GO:0045087	innate immune response	17/108	238/6899	1.31258e-07	1.31258e-07	4.0172e-05	ISG20/ZBP1/TLR6/MX1/STAT1/DUSP10/ISG15/TIFA/RSAD2/IFIT1/CCL8/C6/SPAI-2/CXCL10/GP91-PHOX/SLPI/OASL	17	BP
GO:0000278	mitotic cell cycle	17/108	253/6899	3.17084e-07	3.17084e-07	7.34266e-05	CENPH/KIF22/MAD2L1/DCUN1D3/GINS3/DLGAP5/PTTG1/KIF4A/BRCA1/EME1/CCNB1/CHEK1/KIF20B/NUF2/IQGAP3/ZWINT/E2F7	17	BP
GO:0007049	cell cycle	24/108	490/6899	3.59872e-07	3.59872e-07	7.34266e-05	CENPH/TOP2A/CDCA5/KIF22/RMI1/MAD2L1/DCUN1D3/GINS3/DLGAP5/PTTG1/KIF4A/BRCA1/EME1/CDKN3/ANAPC10/CDC20/CCNB1/CHEK1/KIF20B/NUF2/IQGAP3/ZWINT/E2F7/CEP152	24	BP
GO:0051276	chromosome organization	13/108	148/6899	4.29571e-07	4.29571e-07	7.51265e-05	CENPH/TOP2A/KIF22/MAD2L1/GINS3/DLGAP5/PTTG1/KIF4A/HJURP/CCNB1/CDK3/NUF2/ZWINT	13	BP
GO:0098813	nuclear chromosome segregation	10/108	83/6899	5.44236e-07	5.44236e-07	8.29732e-05	TOP2A/KIF22/RMI1/MAD2L1/PTTG1/KIF4A/EME1/CCNB1/NUF2/ZWINT	10	BP
GO:0000280	nuclear division	12/108	128/6899	6.09992e-07	6.09992e-07	8.29732e-05	TOP2A/KIF22/RMI1/MAD2L1/PTTG1/KIF4A/EME1/CCNB1/CHEK1/KIF20B/NUF2/ZWINT	12	BP
GO:0048285	organelle fission	12/108	140/6899	1.60262e-06	1.60262e-06	0.000196194	TOP2A/KIF22/RMI1/MAD2L1/PTTG1/KIF4A/EME1/CCNB1/CHEK1/KIF20B/NUF2/ZWINT	12	BP
GO:0098542	defense response to other organism	19/108	360/6899	2.4504e-06	2.4504e-06	0.00027271	ISG20/ZBP1/TLR6/MX1/STAT1/DUSP10/ISG15/TIFA/RSAD2/IFIT1/CCL8/C6/IFIT3/SPAI-2/CXCL10/GP91-PHOX/SLPI/CXCL9/OASL	19	BP
GO:0000819	sister chromatid segregation	8/108	59/6899	3.17799e-06	3.17799e-06	0.000279762	TOP2A/KIF22/MAD2L1/PTTG1/KIF4A/CCNB1/NUF2/ZWINT	8	BP
GO:0051607	defense response to virus	11/108	124/6899	3.19934e-06	3.19934e-06	0.000279762	ISG20/ZBP1/MX1/STAT1/ISG15/RSAD2/IFIT1/IFIT3/CXCL10/CXCL9/OASL	11	BP
GO:0140546	defense response to symbiont	11/108	124/6899	3.19934e-06	3.19934e-06	0.000279762	ISG20/ZBP1/MX1/STAT1/ISG15/RSAD2/IFIT1/IFIT3/CXCL10/CXCL9/OASL	11	BP
GO:0051304	chromosome separation	6/108	28/6899	3.64477e-06	3.64477e-06	0.000297464	TOP2A/RMI1/MAD2L1/EME1/CCNB1/ZWINT	6	BP
GO:0034340	response to type I interferon	5/108	17/6899	4.56435e-06	4.56435e-06	0.00032869	ZBP1/MX1/STAT1/ISG15/IFIT1	5	BP
GO:0071357	cellular response to type I interferon	5/108	17/6899	4.56435e-06	4.56435e-06	0.00032869	ZBP1/MX1/STAT1/ISG15/IFIT1	5	BP
GO:0140014	mitotic nuclear division	9/108	87/6899	7.49149e-06	7.49149e-06	0.000509509	KIF22/MAD2L1/PTTG1/KIF4A/CCNB1/CHEK1/KIF20B/NUF2/ZWINT	9	BP
GO:0000070	mitotic sister chromatid segregation	7/108	48/6899	8.22687e-06	8.22687e-06	0.000515855	KIF22/MAD2L1/PTTG1/KIF4A/CCNB1/NUF2/ZWINT	7	BP
GO:0045930	negative regulation of mitotic cell cycle	8/108	67/6899	8.42756e-06	8.42756e-06	0.000515855	MAD2L1/DCUN1D3/BRCA1/EME1/CCNB1/CHEK1/ZWINT/E2F7	8	BP
GO:0009615	response to virus	11/108	139/6899	9.71868e-06	9.71868e-06	0.000566558	ISG20/ZBP1/MX1/STAT1/ISG15/RSAD2/IFIT1/IFIT3/CXCL10/CXCL9/OASL	11	BP
GO:1901991	negative regulation of mitotic cell cycle phase transition	7/108	50/6899	1.08771e-05	1.08771e-05	0.000605269	MAD2L1/DCUN1D3/BRCA1/CCNB1/CHEK1/ZWINT/E2F7	7	BP
GO:0009607	response to biotic stimulus	20/108	446/6899	1.52382e-05	1.52382e-05	0.000811074	ISG20/ZBP1/TLR6/MX1/EME1/STAT1/DUSP10/ISG15/TIFA/RSAD2/IFIT1/CCL8/C6/IFIT3/SPAI-2/CXCL10/GP91-PHOX/SLPI/CXCL9/OASL	20	BP
GO:1901988	negative regulation of cell cycle phase transition	8/108	77/6899	2.38874e-05	2.38874e-05	0.00121847	MAD2L1/DCUN1D3/BRCA1/EME1/CCNB1/CHEK1/ZWINT/E2F7	8	BP
GO:0007346	regulation of mitotic cell cycle	10/108	129/6899	3.02154e-05	3.02154e-05	0.0014796	MAD2L1/DCUN1D3/DLGAP5/BRCA1/EME1/CCNB1/CHEK1/KIF20B/ZWINT/E2F7	10	BP
GO:0051707	response to other organism	19/108	431/6899	3.26512e-05	3.26512e-05	0.00152874	ISG20/ZBP1/TLR6/MX1/STAT1/DUSP10/ISG15/TIFA/RSAD2/IFIT1/CCL8/C6/IFIT3/SPAI-2/CXCL10/GP91-PHOX/SLPI/CXCL9/OASL	19	BP
GO:0043207	response to external biotic stimulus	19/108	432/6899	3.37165e-05	3.37165e-05	0.00152874	ISG20/ZBP1/TLR6/MX1/STAT1/DUSP10/ISG15/TIFA/RSAD2/IFIT1/CCL8/C6/IFIT3/SPAI-2/CXCL10/GP91-PHOX/SLPI/CXCL9/OASL	19	BP
GO:0007093	mitotic cell cycle checkpoint signaling	6/108	42/6899	4.24782e-05	4.24782e-05	0.00185722	MAD2L1/BRCA1/EME1/CCNB1/CHEK1/ZWINT	6	BP
GO:0045132	meiotic chromosome segregation	5/108	28/6899	6.31965e-05	6.31965e-05	0.00266779	TOP2A/RMI1/PTTG1/EME1/NUF2	5	BP
GO:1903046	meiotic cell cycle process	7/108	66/6899	6.90526e-05	6.90526e-05	0.00281783	TOP2A/RMI1/PTTG1/EME1/CDC20/CCNB1/NUF2	7	BP
GO:2001251	negative regulation of chromosome organization	5/108	30/6899	8.93805e-05	8.93805e-05	0.00344582	TOP2A/MAD2L1/CCNB1/CDK3/ZWINT	5	BP
GO:1902850	microtubule cytoskeleton organization involved in mitosis	6/108	48/6899	9.20859e-05	9.20859e-05	0.00344582	CENPH/MAD2L1/DLGAP5/KIF4A/CCNB1/NUF2	6	BP
GO:0006259	DNA metabolic process	15/108	312/6899	9.28859e-05	9.28859e-05	0.00344582	FAM111B/TOP2A/KIF22/ISG20/RMI1/GINS3/TRAIP/BRCA1/EME1/EXO1/CHEK1/CDK3/MLH1/POLE2/E2F7	15	BP
GO:0044419	biological process involved in interspecies interaction between organisms	19/108	467/6899	9.72621e-05	9.72621e-05	0.00350204	ISG20/ZBP1/TLR6/MX1/STAT1/DUSP10/ISG15/TIFA/RSAD2/IFIT1/CCL8/C6/IFIT3/SPAI-2/CXCL10/GP91-PHOX/SLPI/CXCL9/OASL	19	BP
GO:0010948	negative regulation of cell cycle process	8/108	98/6899	0.000136164	0.000136164	0.00476268	MAD2L1/DCUN1D3/BRCA1/EME1/CCNB1/CHEK1/ZWINT/E2F7	8	BP
GO:0019079	viral genome replication	5/108	33/6899	0.000143403	0.000143403	0.00487652	TOP2A/ISG20/MX1/ISG15/CCL8	5	BP
GO:0051321	meiotic cell cycle	7/108	75/6899	0.0001568	0.0001568	0.00518802	TOP2A/RMI1/PTTG1/EME1/CDC20/CCNB1/NUF2	7	BP
GO:0007088	regulation of mitotic nuclear division	5/108	34/6899	0.000166049	0.000166049	0.00534943	MAD2L1/CCNB1/CHEK1/KIF20B/ZWINT	5	BP
GO:0045839	negative regulation of mitotic nuclear division	4/108	20/6899	0.000226842	0.000226842	0.00712058	MAD2L1/CCNB1/CHEK1/ZWINT	4	BP
GO:0000075	cell cycle checkpoint signaling	6/108	57/6899	0.000242961	0.000242961	0.00743588	MAD2L1/BRCA1/EME1/CCNB1/CHEK1/ZWINT	6	BP
GO:1901990	regulation of mitotic cell cycle phase transition	7/108	81/6899	0.000254367	0.000254367	0.0075951	MAD2L1/DCUN1D3/BRCA1/CCNB1/CHEK1/ZWINT/E2F7	7	BP
GO:0007052	mitotic spindle organization	5/108	38/6899	0.000285003	0.000285003	0.00830722	CENPH/DLGAP5/KIF4A/CCNB1/NUF2	5	BP
GO:0006260	DNA replication	7/108	83/6899	0.000296042	0.000296042	0.00842831	FAM111B/RMI1/GINS3/TRAIP/EME1/POLE2/E2F7	7	BP
GO:0044772	mitotic cell cycle phase transition	8/108	111/6899	0.000322997	0.000322997	0.00898672	MAD2L1/DCUN1D3/BRCA1/CCNB1/CHEK1/IQGAP3/ZWINT/E2F7	8	BP
GO:1901987	regulation of cell cycle phase transition	8/108	112/6899	0.000343382	0.000343382	0.00934159	MAD2L1/DCUN1D3/BRCA1/EME1/CCNB1/CHEK1/ZWINT/E2F7	8	BP
GO:0044770	cell cycle phase transition	9/108	142/6899	0.000357044	0.000357044	0.0095021	MAD2L1/DCUN1D3/BRCA1/EME1/CCNB1/CHEK1/IQGAP3/ZWINT/E2F7	9	BP
GO:0007017	microtubule-based process	13/108	278/6899	0.000370044	0.000370044	0.00963856	CENPH/KIF22/MAD2L1/DLGAP5/KIF4A/KIFC1/BRCA1/CCNB1/CHEK1/KIF20B/NUF2/CEP152/KIF2C	13	BP
GO:0007131	reciprocal meiotic recombination	3/108	10/6899	0.000413312	0.000413312	0.0103261	TOP2A/RMI1/EME1	3	BP
GO:0140527	reciprocal homologous recombination	3/108	10/6899	0.000413312	0.000413312	0.0103261	TOP2A/RMI1/EME1	3	BP
GO:0045069	regulation of viral genome replication	4/108	25/6899	0.000557636	0.000557636	0.0134866	TOP2A/ISG20/MX1/ISG15	4	BP
GO:0035825	homologous recombination	3/108	11/6899	0.000561845	0.000561845	0.0134866	TOP2A/RMI1/EME1	3	BP
GO:0045786	negative regulation of cell cycle	8/108	122/6899	0.000611203	0.000611203	0.0143892	MAD2L1/DCUN1D3/BRCA1/EME1/CCNB1/CHEK1/ZWINT/E2F7	8	BP
GO:0006261	DNA-templated DNA replication	5/108	45/6899	0.000635985	0.000635985	0.0146902	GINS3/TRAIP/EME1/POLE2/E2F7	5	BP
GO:0051784	negative regulation of nuclear division	4/108	26/6899	0.000651139	0.000651139	0.0147617	MAD2L1/CCNB1/CHEK1/ZWINT	4	BP
GO:0031396	regulation of protein ubiquitination	6/108	70/6899	0.000744796	0.000744796	0.0165779	MAD2L1/DCUN1D3/BRCA1/CDC20/ISG15/RNF180	6	BP
GO:0051783	regulation of nuclear division	5/108	48/6899	0.000858802	0.000858802	0.0187742	MAD2L1/CCNB1/CHEK1/KIF20B/ZWINT	5	BP
GO:0045071	negative regulation of viral genome replication	3/108	13/6899	0.000951872	0.000951872	0.0200912	ISG20/MX1/ISG15	3	BP
GO:0060337	type I interferon signaling pathway	3/108	13/6899	0.000951872	0.000951872	0.0200912	ZBP1/STAT1/ISG15	3	BP
GO:1903320	regulation of protein modification by small protein conjugation or removal	6/108	75/6899	0.00107385	0.00107385	0.0222817	MAD2L1/DCUN1D3/BRCA1/CDC20/ISG15/RNF180	6	BP
GO:0140013	meiotic nuclear division	5/108	51/6899	0.0011352	0.0011352	0.023162	TOP2A/RMI1/PTTG1/EME1/NUF2	5	BP
GO:0034508	centromere complex assembly	3/108	14/6899	0.00119773	0.00119773	0.0240373	CENPH/DLGAP5/HJURP	3	BP
GO:0010564	regulation of cell cycle process	10/108	207/6899	0.00142075	0.00142075	0.0270458	MAD2L1/DCUN1D3/BRCA1/EME1/CDC20/CCNB1/CHEK1/KIF20B/ZWINT/E2F7	10	BP
GO:0071345	cellular response to cytokine stimulus	11/108	244/6899	0.00143869	0.00143869	0.0270458	ZBP1/TRAIP/BRCA1/MX1/STAT1/ISG15/IFIT1/CCL8/IFIT3/CXCL10/CXCL9	11	BP
GO:0007080	mitotic metaphase plate congression	3/108	15/6899	0.00148019	0.00148019	0.0270458	KIF22/CCNB1/NUF2	3	BP
GO:0007094	mitotic spindle assembly checkpoint signaling	3/108	15/6899	0.00148019	0.00148019	0.0270458	MAD2L1/CCNB1/ZWINT	3	BP
GO:0071173	spindle assembly checkpoint signaling	3/108	15/6899	0.00148019	0.00148019	0.0270458	MAD2L1/CCNB1/ZWINT	3	BP
GO:0071174	mitotic spindle checkpoint signaling	3/108	15/6899	0.00148019	0.00148019	0.0270458	MAD2L1/CCNB1/ZWINT	3	BP
GO:0007127	meiosis I	4/108	33/6899	0.00163848	0.00163848	0.0294977	TOP2A/RMI1/PTTG1/EME1	4	BP
GO:0007051	spindle organization	5/108	56/6899	0.00173524	0.00173524	0.0297969	CENPH/DLGAP5/KIF4A/CCNB1/NUF2	5	BP
GO:0031577	spindle checkpoint signaling	3/108	16/6899	0.00180114	0.00180114	0.0297969	MAD2L1/CCNB1/ZWINT	3	BP
GO:0033046	negative regulation of sister chromatid segregation	3/108	16/6899	0.00180114	0.00180114	0.0297969	MAD2L1/CCNB1/ZWINT	3	BP
GO:0033048	negative regulation of mitotic sister chromatid segregation	3/108	16/6899	0.00180114	0.00180114	0.0297969	MAD2L1/CCNB1/ZWINT	3	BP
GO:0045841	negative regulation of mitotic metaphase/anaphase transition	3/108	16/6899	0.00180114	0.00180114	0.0297969	MAD2L1/CCNB1/ZWINT	3	BP
GO:2000816	negative regulation of mitotic sister chromatid separation	3/108	16/6899	0.00180114	0.00180114	0.0297969	MAD2L1/CCNB1/ZWINT	3	BP
GO:0061982	meiosis I cell cycle process	4/108	34/6899	0.0018348	0.0018348	0.0299491	TOP2A/RMI1/PTTG1/EME1	4	BP
GO:0033047	regulation of mitotic sister chromatid segregation	3/108	17/6899	0.00216234	0.00216234	0.034831	MAD2L1/CCNB1/ZWINT	3	BP
GO:0034097	response to cytokine	11/108	261/6899	0.00245498	0.00245498	0.0387735	ZBP1/TRAIP/BRCA1/MX1/STAT1/ISG15/IFIT1/CCL8/IFIT3/CXCL10/CXCL9	11	BP
GO:0051310	metaphase plate congression	3/108	18/6899	0.00256545	0.00256545	0.0387735	KIF22/CCNB1/NUF2	3	BP
GO:0051985	negative regulation of chromosome segregation	3/108	18/6899	0.00256545	0.00256545	0.0387735	MAD2L1/CCNB1/ZWINT	3	BP
GO:1902100	negative regulation of metaphase/anaphase transition of cell cycle	3/108	18/6899	0.00256545	0.00256545	0.0387735	MAD2L1/CCNB1/ZWINT	3	BP
GO:1905819	negative regulation of chromosome separation	3/108	18/6899	0.00256545	0.00256545	0.0387735	MAD2L1/CCNB1/ZWINT	3	BP
GO:0000226	microtubule cytoskeleton organization	9/108	192/6899	0.00302175	0.00302175	0.0441432	CENPH/MAD2L1/DLGAP5/KIF4A/BRCA1/CCNB1/CHEK1/NUF2/CEP152	9	BP
GO:0019730	antimicrobial humoral response	4/108	39/6899	0.00306497	0.00306497	0.0441432	SPAI-2/CXCL10/SLPI/CXCL9	4	BP
GO:0031398	positive regulation of protein ubiquitination	4/108	39/6899	0.00306497	0.00306497	0.0441432	DCUN1D3/BRCA1/CDC20/RNF180	4	BP
GO:1903900	regulation of viral life cycle	4/108	39/6899	0.00306497	0.00306497	0.0441432	TOP2A/ISG20/MX1/ISG15	4	BP
GO:0019058	viral life cycle	5/108	64/6899	0.00313791	0.00313791	0.0446681	TOP2A/ISG20/MX1/ISG15/CCL8	5	BP
GO:0007091	metaphase/anaphase transition of mitotic cell cycle	3/108	20/6899	0.00350354	0.00350354	0.0471326	MAD2L1/CCNB1/ZWINT	3	BP
GO:0007520	myoblast fusion	3/108	20/6899	0.00350354	0.00350354	0.0471326	ADAMTS15/CXCL10/CXCL9	3	BP
GO:0010965	regulation of mitotic sister chromatid separation	3/108	20/6899	0.00350354	0.00350354	0.0471326	MAD2L1/CCNB1/ZWINT	3	BP
GO:0030071	regulation of mitotic metaphase/anaphase transition	3/108	20/6899	0.00350354	0.00350354	0.0471326	MAD2L1/CCNB1/ZWINT	3	BP
GO:0044773	mitotic DNA damage checkpoint signaling	3/108	20/6899	0.00350354	0.00350354	0.0471326	BRCA1/EME1/CHEK1	3	BP
GO:0033044	regulation of chromosome organization	5/108	66/6899	0.00358848	0.00358848	0.0477505	TOP2A/MAD2L1/CCNB1/CDK3/ZWINT	5	BP
GO:1903322	positive regulation of protein modification by small protein conjugation or removal	4/108	41/6899	0.0036845	0.0036845	0.0485011	DCUN1D3/BRCA1/CDC20/RNF180	4	BP
GO:0006310	DNA recombination	6/108	97/6899	0.00399527	0.00399527	0.0510044	TOP2A/RMI1/BRCA1/EME1/EXO1/CHEK1	6	BP
GO:0044774	mitotic DNA integrity checkpoint signaling	3/108	21/6899	0.00404132	0.00404132	0.0510044	BRCA1/EME1/CHEK1	3	BP
GO:0051306	mitotic sister chromatid separation	3/108	21/6899	0.00404132	0.00404132	0.0510044	MAD2L1/CCNB1/ZWINT	3	BP
GO:0070098	chemokine-mediated signaling pathway	3/108	21/6899	0.00404132	0.00404132	0.0510044	CCL8/CXCL10/CXCL9	3	BP
GO:0044784	metaphase/anaphase transition of cell cycle	3/108	22/6899	0.00462663	0.00462663	0.0566397	MAD2L1/CCNB1/ZWINT	3	BP
GO:0051438	regulation of ubiquitin-protein transferase activity	3/108	22/6899	0.00462663	0.00462663	0.0566397	MAD2L1/DCUN1D3/CDC20	3	BP
GO:1902099	regulation of metaphase/anaphase transition of cell cycle	3/108	22/6899	0.00462663	0.00462663	0.0566397	MAD2L1/CCNB1/ZWINT	3	BP
GO:0006974	cellular response to DNA damage stimulus	11/108	286/6899	0.00494084	0.00494084	0.0598874	TOP2A/KIF22/RMI1/TRAIP/BRCA1/EME1/EXO1/CHEK1/MLH1/POLE2/E2F7	11	BP
GO:0000768	syncytium formation by plasma membrane fusion	3/108	23/6899	0.00526065	0.00526065	0.0619244	ADAMTS15/CXCL10/CXCL9	3	BP
GO:0006949	syncytium formation	3/108	23/6899	0.00526065	0.00526065	0.0619244	ADAMTS15/CXCL10/CXCL9	3	BP
GO:0140253	cell-cell fusion	3/108	23/6899	0.00526065	0.00526065	0.0619244	ADAMTS15/CXCL10/CXCL9	3	BP
GO:0033045	regulation of sister chromatid segregation	3/108	24/6899	0.00594444	0.00594444	0.0661568	MAD2L1/CCNB1/ZWINT	3	BP
GO:0050000	chromosome localization	3/108	24/6899	0.00594444	0.00594444	0.0661568	KIF22/CCNB1/NUF2	3	BP
GO:0051303	establishment of chromosome localization	3/108	24/6899	0.00594444	0.00594444	0.0661568	KIF22/CCNB1/NUF2	3	BP
GO:1905818	regulation of chromosome separation	3/108	24/6899	0.00594444	0.00594444	0.0661568	MAD2L1/CCNB1/ZWINT	3	BP
GO:1990868	response to chemokine	3/108	24/6899	0.00594444	0.00594444	0.0661568	CCL8/CXCL10/CXCL9	3	BP
GO:1990869	cellular response to chemokine	3/108	24/6899	0.00594444	0.00594444	0.0661568	CCL8/CXCL10/CXCL9	3	BP
GO:0050792	regulation of viral process	4/108	48/6899	0.006512	0.006512	0.0718203	TOP2A/ISG20/MX1/ISG15	4	BP
GO:0048525	negative regulation of viral process	3/108	25/6899	0.00667901	0.00667901	0.0730046	ISG20/MX1/ISG15	3	BP
GO:0006281	DNA repair	8/108	180/6899	0.00702933	0.00702933	0.0761538	KIF22/RMI1/BRCA1/EME1/EXO1/CHEK1/MLH1/POLE2	8	BP
GO:0051928	positive regulation of calcium ion transport	3/108	27/6899	0.008304	0.008304	0.0891741	CXCL10/CXCL9/GCG	3	BP
GO:0002237	response to molecule of bacterial origin	5/108	81/6899	0.00855563	0.00855563	0.0910773	TLR6/DUSP10/CXCL10/SLPI/CXCL9	5	BP
GO:0006301	postreplication repair	2/108	10/6899	0.0100665	0.0100665	0.103559	BRCA1/POLE2	2	BP
GO:0031297	replication fork processing	2/108	10/6899	0.0100665	0.0100665	0.103559	TRAIP/EME1	2	BP
GO:0032508	DNA duplex unwinding	2/108	10/6899	0.0100665	0.0100665	0.103559	TOP2A/GINS3	2	BP
GO:0060338	regulation of type I interferon-mediated signaling pathway	2/108	10/6899	0.0100665	0.0100665	0.103559	ZBP1/ISG15	2	BP
GO:0010639	negative regulation of organelle organization	6/108	118/6899	0.0102412	0.0102412	0.104479	TOP2A/MAD2L1/CCNB1/CHEK1/CDK3/ZWINT	6	BP
GO:0016032	viral process	5/108	86/6899	0.0109383	0.0109383	0.109867	TOP2A/ISG20/MX1/ISG15/CCL8	5	BP
GO:0019221	cytokine-mediated signaling pathway	7/108	156/6899	0.0109489	0.0109489	0.109867	ZBP1/TRAIP/STAT1/ISG15/CCL8/CXCL10/CXCL9	7	BP
GO:0010389	regulation of G2/M transition of mitotic cell cycle	3/108	30/6899	0.0111424	0.0111424	0.1109	BRCA1/CCNB1/CHEK1	3	BP
GO:0042770	signal transduction in response to DNA damage	4/108	57/6899	0.0118783	0.0118783	0.113128	BRCA1/EME1/CHEK1/E2F7	4	BP
GO:0051726	regulation of cell cycle	11/108	323/6899	0.0119047	0.0119047	0.113128	MAD2L1/DCUN1D3/DLGAP5/BRCA1/EME1/CDC20/CCNB1/CHEK1/KIF20B/ZWINT/E2F7	11	BP
GO:0007095	mitotic G2 DNA damage checkpoint signaling	2/108	11/6899	0.0121787	0.0121787	0.113128	BRCA1/CHEK1	2	BP
GO:0008608	attachment of spindle microtubules to kinetochore	2/108	11/6899	0.0121787	0.0121787	0.113128	CCNB1/NUF2	2	BP
GO:0044786	cell cycle DNA replication	2/108	11/6899	0.0121787	0.0121787	0.113128	GINS3/E2F7	2	BP
GO:0045648	positive regulation of erythrocyte differentiation	2/108	11/6899	0.0121787	0.0121787	0.113128	STAT1/ISG15	2	BP
GO:0051443	positive regulation of ubiquitin-protein transferase activity	2/108	11/6899	0.0121787	0.0121787	0.113128	DCUN1D3/CDC20	2	BP
GO:0030593	neutrophil chemotaxis	3/108	31/6899	0.012198	0.012198	0.113128	CCL8/CXCL10/CXCL9	3	BP
GO:0051983	regulation of chromosome segregation	3/108	31/6899	0.012198	0.012198	0.113128	MAD2L1/CCNB1/ZWINT	3	BP
GO:0032479	regulation of type I interferon production	3/108	32/6899	0.0133091	0.0133091	0.122505	TRAIP/STAT1/ISG15	3	BP
GO:0032392	DNA geometric change	2/108	12/6899	0.0144663	0.0144663	0.129357	TOP2A/GINS3	2	BP
GO:0045005	DNA-templated DNA replication maintenance of fidelity	2/108	12/6899	0.0144663	0.0144663	0.129357	TRAIP/EME1	2	BP
GO:0015908	fatty acid transport	3/108	33/6899	0.0144762	0.0144762	0.129357	FABP3/PLIN2/FABP6	3	BP
GO:0032606	type I interferon production	3/108	33/6899	0.0144762	0.0144762	0.129357	TRAIP/STAT1/ISG15	3	BP
GO:0045787	positive regulation of cell cycle	5/108	94/6899	0.0156341	0.0156341	0.137267	MAD2L1/CDC20/CCNB1/CHEK1/E2F7	5	BP
GO:0000077	DNA damage checkpoint signaling	3/108	34/6899	0.0156996	0.0156996	0.137267	BRCA1/EME1/CHEK1	3	BP
GO:1902749	regulation of cell cycle G2/M phase transition	3/108	34/6899	0.0156996	0.0156996	0.137267	BRCA1/CCNB1/CHEK1	3	BP
GO:0071356	cellular response to tumor necrosis factor	4/108	62/6899	0.0158099	0.0158099	0.137267	TRAIP/BRCA1/STAT1/CCL8	4	BP
GO:0065004	protein-DNA complex assembly	4/108	63/6899	0.0166832	0.0166832	0.138576	CENPH/DLGAP5/HJURP/ASF1B	4	BP
GO:0001960	negative regulation of cytokine-mediated signaling pathway	2/108	13/6899	0.0169234	0.0169234	0.138576	TRAIP/ISG15	2	BP
GO:0051568	histone H3-K4 methylation	2/108	13/6899	0.0169234	0.0169234	0.138576	BRCA1/GCG	2	BP
GO:0060761	negative regulation of response to cytokine stimulus	2/108	13/6899	0.0169234	0.0169234	0.138576	TRAIP/ISG15	2	BP
GO:0061647	histone H3-K9 modification	2/108	13/6899	0.0169234	0.0169234	0.138576	BRCA1/CHEK1	2	BP
GO:0090329	regulation of DNA-templated DNA replication	2/108	13/6899	0.0169234	0.0169234	0.138576	GINS3/E2F7	2	BP
GO:0001959	regulation of cytokine-mediated signaling pathway	3/108	35/6899	0.0169795	0.0169795	0.138576	ZBP1/TRAIP/ISG15	3	BP
GO:0031570	DNA integrity checkpoint signaling	3/108	35/6899	0.0169795	0.0169795	0.138576	BRCA1/EME1/CHEK1	3	BP
GO:1990266	neutrophil migration	3/108	35/6899	0.0169795	0.0169795	0.138576	CCL8/CXCL10/CXCL9	3	BP
GO:0051301	cell division	7/108	171/6899	0.0174329	0.0174329	0.141335	TOP2A/CDCA5/KIF4A/ANAPC10/CDC20/NUF2/E2F7	7	BP
GO:0009617	response to bacterium	7/108	175/6899	0.0195429	0.0195429	0.152716	TLR6/DUSP10/ISG15/SPAI-2/CXCL10/SLPI/CXCL9	7	BP
GO:0031062	positive regulation of histone methylation	2/108	14/6899	0.0195444	0.0195444	0.152716	BRCA1/GCG	2	BP
GO:0071103	DNA conformation change	2/108	14/6899	0.0195444	0.0195444	0.152716	TOP2A/GINS3	2	BP
GO:1900744	regulation of p38MAPK cascade	2/108	14/6899	0.0195444	0.0195444	0.152716	DUSP10/AGER	2	BP
GO:1901739	regulation of myoblast fusion	2/108	14/6899	0.0195444	0.0195444	0.152716	CXCL10/CXCL9	2	BP
GO:0071621	granulocyte chemotaxis	3/108	37/6899	0.01971	0.01971	0.152716	CCL8/CXCL10/CXCL9	3	BP
GO:1903321	negative regulation of protein modification by small protein conjugation or removal	3/108	37/6899	0.01971	0.01971	0.152716	MAD2L1/DCUN1D3/ISG15	3	BP
GO:0016567	protein ubiquitination	8/108	217/6899	0.0200847	0.0200847	0.154641	MAD2L1/DCUN1D3/TRAIP/BRCA1/CDC20/UBE2L6/ISG15/RNF180	8	BP
GO:0009746	response to hexose	3/108	38/6899	0.0211608	0.0211608	0.158928	RMI1/LPL/GCG	3	BP
GO:0009749	response to glucose	3/108	38/6899	0.0211608	0.0211608	0.158928	RMI1/LPL/GCG	3	BP
GO:0034284	response to monosaccharide	3/108	38/6899	0.0211608	0.0211608	0.158928	RMI1/LPL/GCG	3	BP
GO:0060759	regulation of response to cytokine stimulus	3/108	38/6899	0.0211608	0.0211608	0.158928	ZBP1/TRAIP/ISG15	3	BP
GO:0090068	positive regulation of cell cycle process	4/108	68/6899	0.0215008	0.0215008	0.160497	MAD2L1/CDC20/CCNB1/E2F7	4	BP
GO:0019731	antibacterial humoral response	2/108	15/6899	0.0223235	0.0223235	0.16267	SPAI-2/SLPI	2	BP
GO:0045646	regulation of erythrocyte differentiation	2/108	15/6899	0.0223235	0.0223235	0.16267	STAT1/ISG15	2	BP
GO:0045824	negative regulation of innate immune response	2/108	15/6899	0.0223235	0.0223235	0.16267	DUSP10/ISG15	2	BP
GO:0090183	regulation of kidney development	2/108	15/6899	0.0223235	0.0223235	0.16267	STAT1/WNT2B	2	BP
GO:0034612	response to tumor necrosis factor	4/108	69/6899	0.0225563	0.0225563	0.163395	TRAIP/BRCA1/STAT1/CCL8	4	BP
GO:0006959	humoral immune response	5/108	105/6899	0.0240533	0.0240533	0.168949	C6/SPAI-2/CXCL10/SLPI/CXCL9	5	BP
GO:0000086	G2/M transition of mitotic cell cycle	3/108	40/6899	0.0242339	0.0242339	0.168949	BRCA1/CCNB1/CHEK1	3	BP
GO:0009743	response to carbohydrate	3/108	40/6899	0.0242339	0.0242339	0.168949	RMI1/LPL/GCG	3	BP
GO:0071216	cellular response to biotic stimulus	4/108	71/6899	0.024761	0.024761	0.168949	TLR6/EME1/CXCL10/CXCL9	4	BP
GO:0071824	protein-DNA complex subunit organization	4/108	71/6899	0.024761	0.024761	0.168949	CENPH/DLGAP5/HJURP/ASF1B	4	BP
GO:0006120	mitochondrial electron transport, NADH to ubiquinone	2/108	16/6899	0.0252552	0.0252552	0.168949	ND2/ND1	2	BP
GO:0007062	sister chromatid cohesion	2/108	16/6899	0.0252552	0.0252552	0.168949	KIF22/PTTG1	2	BP
GO:0015909	long-chain fatty acid transport	2/108	16/6899	0.0252552	0.0252552	0.168949	FABP3/PLIN2	2	BP
GO:0038066	p38MAPK cascade	2/108	16/6899	0.0252552	0.0252552	0.168949	DUSP10/AGER	2	BP
GO:0044818	mitotic G2/M transition checkpoint	2/108	16/6899	0.0252552	0.0252552	0.168949	BRCA1/CHEK1	2	BP
GO:0051281	positive regulation of release of sequestered calcium ion into cytosol	2/108	16/6899	0.0252552	0.0252552	0.168949	CXCL10/CXCL9	2	BP
GO:0060142	regulation of syncytium formation by plasma membrane fusion	2/108	16/6899	0.0252552	0.0252552	0.168949	CXCL10/CXCL9	2	BP
GO:1901976	regulation of cell cycle checkpoint	2/108	16/6899	0.0252552	0.0252552	0.168949	MAD2L1/CCNB1	2	BP
GO:2000134	negative regulation of G1/S transition of mitotic cell cycle	2/108	16/6899	0.0252552	0.0252552	0.168949	DCUN1D3/E2F7	2	BP
GO:0097530	granulocyte migration	3/108	41/6899	0.0258563	0.0258563	0.17203	CCL8/CXCL10/CXCL9	3	BP
GO:0007098	centrosome cycle	3/108	42/6899	0.0275357	0.0275357	0.181234	BRCA1/CHEK1/CEP152	3	BP
GO:0014902	myotube differentiation	3/108	42/6899	0.0275357	0.0275357	0.181234	ADAMTS15/CXCL10/CXCL9	3	BP
GO:0002548	monocyte chemotaxis	2/108	17/6899	0.0283343	0.0283343	0.18353	CCL8/CXCL10	2	BP
GO:1903537	meiotic cell cycle process involved in oocyte maturation	2/108	17/6899	0.0283343	0.0283343	0.18353	CDC20/CCNB1	2	BP
GO:1903538	regulation of meiotic cell cycle process involved in oocyte maturation	2/108	17/6899	0.0283343	0.0283343	0.18353	CDC20/CCNB1	2	BP
GO:0030282	bone mineralization	3/108	43/6899	0.029272	0.029272	0.187619	PHEX/ISG15/OSR2	3	BP
GO:0042775	mitochondrial ATP synthesis coupled electron transport	3/108	43/6899	0.029272	0.029272	0.187619	ND2/CCNB1/ND1	3	BP
GO:0032496	response to lipopolysaccharide	4/108	75/6899	0.0295502	0.0295502	0.188415	DUSP10/CXCL10/SLPI/CXCL9	4	BP
GO:0032446	protein modification by small protein conjugation	8/108	235/6899	0.0305232	0.0305232	0.19361	MAD2L1/DCUN1D3/TRAIP/BRCA1/CDC20/UBE2L6/ISG15/RNF180	8	BP
GO:0031060	regulation of histone methylation	2/108	18/6899	0.0315554	0.0315554	0.199126	BRCA1/GCG	2	BP
GO:0007018	microtubule-based movement	5/108	113/6899	0.031729	0.031729	0.199195	KIF22/KIF4A/KIFC1/KIF20B/KIF2C	5	BP
GO:0044839	cell cycle G2/M phase transition	3/108	45/6899	0.032915	0.032915	0.205586	BRCA1/CCNB1/CHEK1	3	BP
GO:0031023	microtubule organizing center organization	3/108	46/6899	0.0348212	0.0348212	0.214781	BRCA1/CHEK1/CEP152	3	BP
GO:0010972	negative regulation of G2/M transition of mitotic cell cycle	2/108	19/6899	0.0349135	0.0349135	0.214781	BRCA1/CHEK1	2	BP
GO:0030501	positive regulation of bone mineralization	2/108	19/6899	0.0349135	0.0349135	0.214781	ISG15/OSR2	2	BP
GO:0070647	protein modification by small protein conjugation or removal	9/108	288/6899	0.0359994	0.0359994	0.219312	MAD2L1/DCUN1D3/TRAIP/BRCA1/CDC20/UBE2L6/ISG15/USP53/RNF180	9	BP
GO:0051129	negative regulation of cellular component organization	7/108	199/6899	0.0360559	0.0360559	0.219312	TOP2A/MAD2L1/CCNB1/CHEK1/CDK3/ZWINT/CXCL10	7	BP
GO:0050776	regulation of immune response	8/108	243/6899	0.0361874	0.0361874	0.219312	ZBP1/TLR6/CD200/DUSP10/ISG15/TIFA/RSAD2/C6	8	BP
GO:0000082	G1/S transition of mitotic cell cycle	3/108	47/6899	0.0367835	0.0367835	0.219662	DCUN1D3/IQGAP3/E2F7	3	BP
GO:0031056	regulation of histone modification	3/108	47/6899	0.0367835	0.0367835	0.219662	BRCA1/CHEK1/GCG	3	BP
GO:0042773	ATP synthesis coupled electron transport	3/108	47/6899	0.0367835	0.0367835	0.219662	ND2/CCNB1/ND1	3	BP
GO:1902750	negative regulation of cell cycle G2/M phase transition	2/108	20/6899	0.0384034	0.0384034	0.228223	BRCA1/CHEK1	2	BP
GO:0043009	chordate embryonic development	7/108	203/6899	0.0395011	0.0395011	0.233612	BRCA1/CCNB1/ASF1B/CHEK1/OSR2/E2F7/HOXC6	7	BP
GO:0071897	DNA biosynthetic process	3/108	49/6899	0.0408752	0.0408752	0.240416	GINS3/CDK3/POLE2	3	BP
GO:0032608	interferon-beta production	2/108	21/6899	0.0420205	0.0420205	0.240416	TRAIP/ISG15	2	BP
GO:0032648	regulation of interferon-beta production	2/108	21/6899	0.0420205	0.0420205	0.240416	TRAIP/ISG15	2	BP
GO:0070169	positive regulation of biomineral tissue development	2/108	21/6899	0.0420205	0.0420205	0.240416	ISG15/OSR2	2	BP
GO:1902807	negative regulation of cell cycle G1/S phase transition	2/108	21/6899	0.0420205	0.0420205	0.240416	DCUN1D3/E2F7	2	BP
GO:1904427	positive regulation of calcium ion transmembrane transport	2/108	21/6899	0.0420205	0.0420205	0.240416	CXCL10/CXCL9	2	BP
GO:0006302	double-strand break repair	4/108	84/6899	0.0422117	0.0422117	0.240416	RMI1/BRCA1/EME1/CHEK1	4	BP
GO:0009792	embryo development ending in birth or egg hatching	7/108	206/6899	0.0422227	0.0422227	0.240416	BRCA1/CCNB1/ASF1B/CHEK1/OSR2/E2F7/HOXC6	7	BP
GO:0043270	positive regulation of ion transport	3/108	50/6899	0.0430038	0.0430038	0.24373	CXCL10/CXCL9/GCG	3	BP
GO:0016311	dephosphorylation	5/108	123/6899	0.0432772	0.0432772	0.24415	PTPN13/PLPP1/CDKN3/DUSP10/PTPMT1	5	BP
GO:0002831	regulation of response to biotic stimulus	4/108	85/6899	0.0437812	0.0437812	0.24586	ZBP1/DUSP10/ISG15/IFIT1	4	BP
GO:0000724	double-strand break repair via homologous recombination	3/108	51/6899	0.0451872	0.0451872	0.25006	RMI1/BRCA1/CHEK1	3	BP
GO:0000725	recombinational repair	3/108	51/6899	0.0451872	0.0451872	0.25006	RMI1/BRCA1/CHEK1	3	BP
GO:0035065	regulation of histone acetylation	2/108	22/6899	0.0457599	0.0457599	0.25006	BRCA1/CHEK1	2	BP
GO:0045778	positive regulation of ossification	2/108	22/6899	0.0457599	0.0457599	0.25006	ISG15/OSR2	2	BP
GO:0097194	execution phase of apoptosis	2/108	22/6899	0.0457599	0.0457599	0.25006	TOP2A/GCG	2	BP
GO:0110151	positive regulation of biomineralization	2/108	22/6899	0.0457599	0.0457599	0.25006	ISG15/OSR2	2	BP
GO:0006954	inflammatory response	8/108	255/6899	0.045959	0.045959	0.25006	TLR6/CD200/DUSP10/AGER/CCL8/CXCL10/GP91-PHOX/CXCL9	8	BP
GO:0006470	protein dephosphorylation	4/108	87/6899	0.0470179	0.0470179	0.25469	PTPN13/CDKN3/DUSP10/PTPMT1	4	BP
GO:0007292	female gamete generation	3/108	52/6899	0.0474249	0.0474249	0.255762	TOP2A/CDC20/CCNB1	3	BP
GO:0002832	negative regulation of response to biotic stimulus	2/108	23/6899	0.049617	0.049617	0.264094	DUSP10/ISG15	2	BP
GO:0032481	positive regulation of type I interferon production	2/108	23/6899	0.049617	0.049617	0.264094	STAT1/ISG15	2	BP
GO:0048247	lymphocyte chemotaxis	2/108	23/6899	0.049617	0.049617	0.264094	CCL8/CXCL10	2	BP
GO:0005694	chromosome	21/105	346/7848	3.99518e-09	3.99518e-09	5.76146e-07	CENPH/FAM111B/TOP2A/CDCA5/KIF22/RMI1/MAD2L1/CENPL/GINS3/HJURP/TRAIP/BRCA1/EME1/CCNB1/ASF1B/CHEK1/CDK3/NUF2/ZWINT/POLE2/ETV4	21	CC
GO:0000793	condensed chromosome	9/105	73/7848	4.6332e-07	4.6332e-07	3.01422e-05	CENPH/TOP2A/MAD2L1/HJURP/BRCA1/CCNB1/CHEK1/NUF2/ZWINT	9	CC
GO:0098687	chromosomal region	10/105	98/7848	6.27046e-07	6.27046e-07	3.01422e-05	CENPH/TOP2A/MAD2L1/CENPL/HJURP/CCNB1/CHEK1/CDK3/NUF2/ZWINT	10	CC
GO:0000775	chromosome, centromeric region	8/105	66/7848	2.3724e-06	2.3724e-06	8.55311e-05	CENPH/TOP2A/MAD2L1/CENPL/HJURP/CCNB1/NUF2/ZWINT	8	CC
GO:0000776	kinetochore	6/105	47/7848	3.41917e-05	3.41917e-05	0.00098616	CENPH/MAD2L1/HJURP/CCNB1/NUF2/ZWINT	6	CC
GO:0000779	condensed chromosome, centromeric region	6/105	49/7848	4.35753e-05	4.35753e-05	0.00104734	CENPH/MAD2L1/HJURP/CCNB1/NUF2/ZWINT	6	CC
GO:0000228	nuclear chromosome	5/105	61/7848	0.00127918	0.00127918	0.0248887	TOP2A/GINS3/BRCA1/CHEK1/POLE2	5	CC
GO:0000152	nuclear ubiquitin ligase complex	3/105	17/7848	0.00138069	0.00138069	0.0248887	BRCA1/ANAPC10/CDC20	3	CC
GO:0000151	ubiquitin ligase complex	5/105	93/7848	0.00798407	0.00798407	0.127932	DCUN1D3/BRCA1/ANAPC10/CDC20/UBE2L6	5	CC
GO:0015630	microtubule cytoskeleton	11/105	367/7848	0.00971658	0.00971658	0.140123	TOP2A/KIF22/MAD2L1/DLGAP5/KIFC1/MX1/CDC20/CCNB1/CHEK1/CEP152/KIF2C	11	CC
GO:0005819	spindle	5/105	110/7848	0.0157459	0.0157459	0.182781	KIF22/MAD2L1/DLGAP5/CDC20/CCNB1	5	CC
GO:0016604	nuclear body	8/105	244/7848	0.0162605	0.0162605	0.182781	KIF22/ISG20/RMI1/BRCA1/DUSP10/ZWINT/POLE2/E2F7	8	CC
GO:0048471	perinuclear region of cytoplasm	6/105	153/7848	0.016477	0.016477	0.182781	PHEX/MAD2L1/DCUN1D3/MX1/CDKN3/S100A4	6	CC
GO:0000922	spindle pole	3/105	45/7848	0.0219947	0.0219947	0.221199	DLGAP5/CDC20/CCNB1	3	CC
GO:0099080	supramolecular complex	10/105	363/7848	0.0230079	0.0230079	0.221199	CENPH/KIF22/MAD2L1/HJURP/KIFC1/MX1/CCNB1/NUF2/ZWINT/KIF2C	10	CC
GO:0000794	condensed nuclear chromosome	2/105	20/7848	0.0288002	0.0288002	0.259581	BRCA1/CHEK1	2	CC
GO:1905348	endonuclease complex	2/105	21/7848	0.0315584	0.0315584	0.267709	TSEN2/EME1	2	CC
GO:0003777	microtubule motor activity	5/103	16/7135	2.18948e-06	2.18948e-06	0.000474771	KIF22/KIF4A/KIFC1/KIF20B/KIF2C	5	MF
GO:0003774	cytoskeletal motor activity	5/103	28/7135	4.29244e-05	4.29244e-05	0.00465391	KIF22/KIF4A/KIFC1/KIF20B/KIF2C	5	MF
GO:0008009	chemokine activity	5/103	33/7135	9.78875e-05	9.78875e-05	0.00707538	CCL19/CCL26/CCL8/CXCL10/CXCL9	5	MF
GO:0008017	microtubule binding	7/103	79/7135	0.000131661	0.000131661	0.00713742	KIF22/DLGAP5/KIF4A/KIFC1/MX1/KIF20B/KIF2C	7	MF
GO:0042379	chemokine receptor binding	5/103	42/7135	0.000316536	0.000316536	0.0137277	CCL19/CCL26/CCL8/CXCL10/CXCL9	5	MF
GO:0001664	G protein-coupled receptor binding	8/103	131/7135	0.000574186	0.000574186	0.0207513	CCL19/CCL26/CCL8/CXCL10/WNT2B/CXCL9/GNA14/GCG	8	MF
GO:0015631	tubulin binding	7/103	111/7135	0.00105873	0.00105873	0.0327968	KIF22/DLGAP5/KIF4A/KIFC1/MX1/KIF20B/KIF2C	7	MF
GO:0008138	protein tyrosine/serine/threonine phosphatase activity	3/103	24/7135	0.00474401	0.00474401	0.128588	CDKN3/DUSP10/PTPMT1	3	MF
GO:0016651	oxidoreductase activity, acting on NAD(P)H	3/103	26/7135	0.00596827	0.00596827	0.143797	ND2/GP91-PHOX/ND1	3	MF
GO:0030515	snoRNA binding	2/103	10/7135	0.00861186	0.00861186	0.145063	ISG20/NUDT4	2	MF
GO:0140657	ATP-dependent activity	8/103	205/7135	0.00933228	0.00933228	0.145063	TOP2A/KIF22/KIF4A/KIFC1/DHX16/KIF20B/MLH1/KIF2C	8	MF
GO:0008237	metallopeptidase activity	5/103	94/7135	0.0113237	0.0113237	0.145063	PHEX/MMP3/ADAMTS15/XPNPEP2/CPO	5	MF
GO:0016462	pyrophosphatase activity	9/103	258/7135	0.0119224	0.0119224	0.145063	PPA1/ARL10/MX1/DHX16/PLPP1/NUDT4/MLH1/MX2/GNA14	9	MF
GO:0003954	NADH dehydrogenase activity	2/103	12/7135	0.0123956	0.0123956	0.145063	ND2/ND1	2	MF
GO:0008137	NADH dehydrogenase (ubiquinone) activity	2/103	12/7135	0.0123956	0.0123956	0.145063	ND2/ND1	2	MF
GO:0031624	ubiquitin conjugating enzyme binding	2/103	12/7135	0.0123956	0.0123956	0.145063	DCUN1D3/RNF180	2	MF
GO:0050136	NADH dehydrogenase (quinone) activity	2/103	12/7135	0.0123956	0.0123956	0.145063	ND2/ND1	2	MF
GO:0016818	hydrolase activity, acting on acid anhydrides, in phosphorus-containing anhydrides	9/103	261/7135	0.0127893	0.0127893	0.145063	PPA1/ARL10/MX1/DHX16/PLPP1/NUDT4/MLH1/MX2/GNA14	9	MF
GO:0016817	hydrolase activity, acting on acid anhydrides	9/103	262/7135	0.0130884	0.0130884	0.145063	PPA1/ARL10/MX1/DHX16/PLPP1/NUDT4/MLH1/MX2/GNA14	9	MF
GO:0016788	hydrolase activity, acting on ester bonds	10/103	309/7135	0.0133796	0.0133796	0.145063	ISG20/PTPN13/TSEN2/EME1/PLPP1/CDKN3/EXO1/DUSP10/PTPMT1/LPL	10	MF
GO:0004721	phosphoprotein phosphatase activity	4/103	66/7135	0.0148967	0.0148967	0.15382	PTPN13/CDKN3/DUSP10/PTPMT1	4	MF
GO:0003955	NAD(P)H dehydrogenase (quinone) activity	2/103	14/7135	0.0167734	0.0167734	0.165327	ND2/ND1	2	MF
GO:0044390	ubiquitin-like protein conjugating enzyme binding	2/103	15/7135	0.0191737	0.0191737	0.180768	DCUN1D3/RNF180	2	MF
GO:0016655	oxidoreductase activity, acting on NAD(P)H, quinone or similar compound as acceptor	2/103	16/7135	0.0217089	0.0217089	0.196142	ND2/ND1	2	MF
GO:0005125	cytokine activity	6/103	154/7135	0.0236045	0.0236045	0.204738	CCL19/CCL26/CCL8/CXCL10/WNT2B/CXCL9	6	MF
GO:0016791	phosphatase activity	5/103	118/7135	0.0275769	0.0275769	0.229993	PTPN13/PLPP1/CDKN3/DUSP10/PTPMT1	5	MF
GO:0004518	nuclease activity	4/103	83/7135	0.0315828	0.0315828	0.24928	ISG20/TSEN2/EME1/EXO1	4	MF
GO:0005504	fatty acid binding	2/103	20/7135	0.0331145	0.0331145	0.24928	FABP3/FABP6	2	MF
GO:0004519	endonuclease activity	3/103	49/7135	0.0333382	0.0333382	0.24928	TSEN2/EME1/EXO1	3	MF
GO:0015453	oxidoreduction-driven active transmembrane transporter activity	2/103	21/7135	0.0362616	0.0362616	0.262102	ND2/ND1	2	MF
GO:0004222	metalloendopeptidase activity	3/103	52/7135	0.0387789	0.0387789	0.267354	PHEX/MMP3/ADAMTS15	3	MF
GO:0016796	exonuclease activity, active with either ribo- or deoxyribonucleic acids and producing 5'-phosphomonoesters	2/103	22/7135	0.0395192	0.0395192	0.267354	ISG20/EXO1	2	MF
GO:0008201	heparin binding	3/103	53/7135	0.0406871	0.0406871	0.267354	ADAMTS15/CXCL10/LPL	3	MF
GO:0004842	ubiquitin-protein transferase activity	5/103	133/7135	0.0428621	0.0428621	0.27	TRAIP/BRCA1/UBE2L6/RNF144B/RNF180	5	MF
GO:0044389	ubiquitin-like protein ligase binding	4/103	92/7135	0.0435801	0.0435801	0.27	BRCA1/CCNB1/UBE2L6/ISG15	4	MF
GO:0008092	cytoskeletal protein binding	9/103	326/7135	0.0452248	0.0452248	0.272407	KIF22/DLGAP5/PLS3/KIF4A/KIFC1/MX1/KIF20B/IQGAP3/KIF2C	9	MF
