# Supplementary material for: The Metabolic Pathway of Bile Secretion Is Vulnerable to Salmonella enterica Exposure in Porcine Intestinal Epithelial Cells
Source: Animals (Basel). 2024 Mar 3;14(5):789. doi: 10.3390/ani14050789 (PMC10931422; doi:10.3390/ani14050789)
Supplement: Supplementary file 1 [file animals-14-00789-s001.zip › Table S4. Signaling pathway associate with up and DOWN-regulated genes between Salmonella infection and Control group .xlsx]

## Sheet: Up-regulated genes enriched
ID	Description	GeneRatio	BgRatio	pvalue	p.adjust	qvalue	geneID	Count
ssc04977	Vitamin digestion and absorption	11/286	25/9206	6.50818e-11	6.50818e-11	1.76748e-08	SLC46A1/SCARB1/FOLH1B/SLC5A6/APOB/SLC19A1/APOA1/SLC19A3/LRAT/TCN2/SLC52A3	11
ssc04978	Mineral absorption	14/286	54/9206	6.04016e-10	6.04016e-10	8.20191e-08	SLC46A1/CYBRD1/SLC9A3/SLC40A1/ATP2B1/TRPV6/SLC6A19/VDR/ATP1B3/S100G/SLC5A1/SLC11A2/ATP7A/SLC39A4	14
ssc00830	Retinol metabolism	14/286	67/9206	1.26632e-08	1.26632e-08	1.14635e-06	CYP1A1/RDH5/BCO1/CYP3A29/ADH4/CYP2C42/CYP3A46/RETSAT/RDH16/LRAT/LOC100623504/DGAT1/UGT1A6/LOC100624788	14
ssc04976	Bile secretion	15/286	85/9206	4.27009e-08	4.27009e-08	2.89916e-06	AQP8/SCARB1/SLC2A1/SCT/SLC9A3/ATP1B3/ABCC2/ABCC3/SLC5A1/LOC100623504/ADCY9/UGT1A6/EPHX1/LOC100153359/LOC100624788	15
ssc04979	Cholesterol metabolism	9/286	50/9206	1.94395e-05	1.94395e-05	0.00105587	SCARB1/ANGPTL4/APOB/ABCA1/APOA1/APOC3/STARD3/SOAT2/MYLIP	9
ssc00600	Sphingolipid metabolism	9/286	54/9206	3.70034e-05	3.70034e-05	0.00158936	ENPP7/SMPD3/SPHK2/UGCG/GLB1/KDSR/GAL3ST1/SGMS2/UGT8	9
ssc00564	Glycerophospholipid metabolism	12/286	97/9206	4.3268e-05	4.3268e-05	0.00158936	LOC102158609/PHOSPHO1/LPGAT1/AGPAT2/GPD1/CDS1/PLA2G15/CDIPT/PISD/LPIN2/GPAT3/MBOAT7	12
ssc04142	Lysosome	14/286	130/9206	4.88005e-05	4.88005e-05	0.00158936	CTNS/CTSZ/IDUA/PLA2G15/LAPTM4B/SLC11A2/GLB1/CTSD/HYAL1/ACP2/HYAL2/ABCB9/PPT2/ATP6V0A1	14
ssc04975	Fat digestion and absorption	8/286	44/9206	5.26708e-05	5.26708e-05	0.00158936	SCARB1/AGPAT2/SLC27A4/APOB/ABCA1/APOA1/MOGAT2/DGAT1	8
ssc05204	Chemical carcinogenesis - DNA adducts	9/286	58/9206	6.64579e-05	6.64579e-05	0.00180486	CYP1A1/CYP3A29/CYP2C42/CYP3A46/LOC100623504/GSTK1/UGT1A6/EPHX1/LOC100624788	9
ssc00980	Metabolism of xenobiotics by cytochrome P450	8/286	58/9206	0.000390892	0.000390892	0.00965073	CYP1A1/ADH4/LOC100623504/GSTK1/UGT1A6/EPHX1/LOC100624788/ALDH3B1	8
ssc00140	Steroid hormone biosynthesis	8/286	63/9206	0.000690713	0.000690713	0.0156319	CYP1A1/CYP3A29/CYP2C42/CYP3A46/HSD17B2/LOC100623504/UGT1A6/LOC100624788	8
ssc02010	ABC transporters	7/286	51/9206	0.000930479	0.000930479	0.0194383	ABCA1/ABCC2/ABCC3/ABCD1/ABCA3/LOC100153359/ABCB9	7
ssc04514	Cell adhesion molecules	13/286	155/9206	0.0010552	0.0010552	0.0204692	CLDN2/LOC100621559/VSIR/CLDN4/CD6/ICOSLG/GLG1/ITGB7/SELPLG/PTPRF/ITGB8/CDH1/CD99L2	13
ssc04911	Insulin secretion	9/286	85/9206	0.0012366	0.0012366	0.0223889	PDX1/SLC2A1/ATP1B3/CREB3L2/TRPM4/ADCY9/CCK/GIP/CREB3L3	9
ssc04974	Protein digestion and absorption	10/286	104/9206	0.00142009	0.00142009	0.0241042	SLC9A3/COL17A1/SLC36A1/SLC6A19/ATP1B3/KCNQ1/SLC7A8/KCNK5/MME/KCNJ13	10
ssc00531	Glycosaminoglycan degradation	4/286	18/9206	0.00197738	0.00197738	0.0315892	IDUA/GLB1/HYAL1/HYAL2	4
ssc01523	Antifolate resistance	5/286	32/9206	0.00282582	0.00282582	0.0426351	SLC46A1/SLC19A1/ABCC2/ABCC3/LOC100153359	5
ssc00982	Drug metabolism - cytochrome P450	6/286	53/9206	0.00574585	0.00574585	0.08054	ADH4/LOC100623504/GSTK1/UGT1A6/LOC100624788/ALDH3B1	6
ssc00053	Ascorbate and aldarate metabolism	4/286	24/9206	0.00593124	0.00593124	0.08054	RGN/LOC100623504/UGT1A6/LOC100624788	4
ssc04931	Insulin resistance	9/286	110/9206	0.00712364	0.00712364	0.0888228	SLC2A1/SREBF1/SLC27A4/TRIB3/PIK3CD/INSR/CREB3L2/PTPRF/CREB3L3	9
ssc04918	Thyroid hormone synthesis	7/286	73/9206	0.00734239	0.00734239	0.0888228	ASGR2/ATP1B3/IYD/CREB3L2/ADCY9/ITPR2/CREB3L3	7
ssc04913	Ovarian steroidogenesis	6/286	56/9206	0.00752239	0.00752239	0.0888228	CYP1A1/SCARB1/HSD17B2/INSR/ADCY9/CYP2J34	6
ssc00604	Glycosphingolipid biosynthesis - ganglio series	3/286	15/9206	0.0102304	0.0102304	0.113496	ST6GALNAC4/B3GALT4/GLB1	3
ssc03320	PPAR signaling pathway	7/286	78/9206	0.0104478	0.0104478	0.113496	AQP7/SLC27A4/ACSL3/ANGPTL4/APOA1/APOC3/PPARG	7
ssc00561	Glycerolipid metabolism	6/286	61/9206	0.0113147	0.0113147	0.117882	AGPAT2/GLYCTK/MOGAT2/LPIN2/DGAT1/GPAT3	6
ssc04972	Pancreatic secretion	8/286	99/9206	0.0117197	0.0117197	0.117882	SCT/ATP2B1/BST1/ATP1B3/KCNQ1/ADCY9/CCK/ITPR2	8
ssc01240	Biosynthesis of cofactors	10/286	143/9206	0.0135482	0.0135482	0.131408	BCO1/LOC100522404/RGN/NME7/PMM1/GCLC/SPR/LOC100623504/UGT1A6/LOC100624788	10
ssc04973	Carbohydrate digestion and absorption	5/286	47/9206	0.0147644	0.0147644	0.13419	ATP1B3/LCT/PIK3CD/SLC5A1/MGAM2	5
ssc00052	Galactose metabolism	4/286	31/9206	0.0148233	0.0148233	0.13419	B4GALT1/LCT/GLB1/MGAM2	4
ssc04146	Peroxisome	7/286	87/9206	0.0182843	0.0182843	0.160181	ACSL3/LOC110255229/ABCD1/MPV17L2/PEX11G/GSTK1/PAOX	7
ssc04750	Inflammatory mediator regulation of TRP channels	8/286	109/9206	0.0199859	0.0199859	0.168463	P2RY2/CYP2C42/F2RL1/PIK3CD/ADCY9/CYP2J34/MAP2K6/ITPR2	8
ssc04211	Longevity regulating pathway	7/286	89/9206	0.0204703	0.0204703	0.168463	PIK3CD/INSR/CREB3L2/ADCY9/PPARG/SESN3/CREB3L3	7
ssc04970	Salivary secretion	7/286	90/9206	0.0216289	0.0216289	0.172763	DMBT1/ATP2B1/TRPV6/BST1/ATP1B3/ADCY9/ITPR2	7
ssc05207	Chemical carcinogenesis - receptor activation	12/286	202/9206	0.0236023	0.0236023	0.18314	CYP1A1/CYP3A29/VDR/CYP3A46/PIK3CD/CREB3L2/LOC100623504/ADCY9/UGT1A6/EPHX1/LOC100624788/CREB3L3	12
ssc04925	Aldosterone synthesis and secretion	7/286	93/9206	0.0253762	0.0253762	0.187556	SCARB1/ATP2B1/ATP1B3/CREB3L2/ADCY9/ITPR2/CREB3L3	7
ssc04360	Axon guidance	11/286	182/9206	0.0264274	0.0264274	0.187556	EFNA1/RHOD/SEMA6A/PLXNA2/PIK3CD/EPHB6/EPHA1/SEMA5A/SSH2/PLXNB2/PLXNA1	11
ssc00350	Tyrosine metabolism	4/286	37/9206	0.0269339	0.0269339	0.187556	ADH4/TH/IL4I1/ALDH3B1	4
ssc00591	Linoleic acid metabolism	4/286	37/9206	0.0269339	0.0269339	0.187556	CYP3A29/CYP2C42/CYP3A46/CYP2J34	4
ssc04152	AMPK signaling pathway	8/286	122/9206	0.0360399	0.0360399	0.244692	PFKFB3/SREBF1/PIK3CD/INSR/CREB3L2/PPARG/CREB3L3/PFKFB4	8
ssc00534	Glycosaminoglycan biosynthesis - heparan sulfate / heparin	3/286	24/9206	0.0370841	0.0370841	0.24564	GLCE/NDST1/HS2ST1	3
ssc04216	Ferroptosis	4/286	42/9206	0.0405076	0.0405076	0.261929	SLC40A1/ACSL3/SLC11A2/GCLC	4
ssc04927	Cortisol synthesis and secretion	5/286	62/9206	0.0429336	0.0429336	0.271159	SCARB1/CREB3L2/ADCY9/ITPR2/CREB3L3	5
ssc00040	Pentose and glucuronate interconversions	3/286	26/9206	0.0455385	0.0455385	0.281075	LOC100623504/UGT1A6/LOC100624788	3

## Sheet: Down-regulated genes enriched
ID	Description	GeneRatio	BgRatio	pvalue	p.adjust	qvalue	geneID	Count
ssc04110	Cell cycle	10/108	154/9206	1.21809e-05	1.21809e-05	0.00197459	CDCA5/MAD2L1/PTTG1/BUB1/ANAPC10/CDC20/CCNB1/SFN/CHEK1/TICRR	10
ssc04814	Motor proteins	10/108	186/9206	6.20682e-05	6.20682e-05	0.00503079	KIF22/KIF4A/TUBB6/KIFC1/KIF23/KIF20B/KIF15/MYO19/ACTG2/KIF2C	10
ssc03460	Fanconi anemia pathway	5/108	49/9206	0.000256091	0.000256091	0.0138379	FANCA/RMI1/BRCA1/EME1/MLH1	5
ssc04061	Viral protein interaction with cytokine and cytokine receptor	6/108	85/9206	0.000467931	0.000467931	0.0189635	ACKR4/CCL19/CCL26/CCL8/CXCL10/CXCL9	6
ssc04120	Ubiquitin mediated proteolysis	7/108	144/9206	0.00148102	0.00148102	0.0480162	TRIM37/BRCA1/ANAPC10/CDC20/UBE2L6/NEDD4/LOC100156381	7
ssc03430	Mismatch repair	3/108	21/9206	0.0017906	0.0017906	0.0483775	EXO1/MLH1/MSH3	3
ssc03320	PPAR signaling pathway	5/108	78/9206	0.0021671	0.0021671	0.0501854	FABP3/ACSBG1/PLIN2/LPL/FABP6	5
ssc04114	Oocyte meiosis	6/108	120/9206	0.00280939	0.00280939	0.0569272	MAD2L1/PTTG1/BUB1/ANAPC10/CDC20/CCNB1	6
ssc04914	Progesterone-mediated oocyte maturation	5/108	92/9206	0.00443674	0.00443674	0.0799132	KIF22/MAD2L1/BUB1/ANAPC10/CCNB1	5
ssc00920	Sulfur metabolism	2/108	10/9206	0.00577073	0.00577073	0.0935465	MPST/PAPSS2	2
ssc03030	DNA replication	3/108	35/9206	0.00782444	0.00782444	0.115308	POLE/POLE2/DNA2	3
ssc01524	Platinum drug resistance	4/108	74/9206	0.0109924	0.0109924	0.137071	TOP2A/BRCA1/MLH1/MSH3	4
ssc04115	p53 signaling pathway	4/108	74/9206	0.0109924	0.0109924	0.137071	GTSE1/CCNB1/SFN/CHEK1	4
ssc00670	One carbon pool by folate	2/108	18/9206	0.018459	0.018459	0.213736	SHMT1/ALDH1L1	2
ssc04062	Chemokine signaling pathway	6/108	182/9206	0.0200016	0.0200016	0.216158	CCL19/CCL26/STAT1/CCL8/CXCL10/CXCL9	6
ssc05171	Coronavirus disease - COVID-19	7/108	251/9206	0.0279766	0.0279766	0.283447	MMP3/MX1/STAT1/ISG15/C6/CXCL10/GP91-PHOX	7
ssc04620	Toll-like receptor signaling pathway	4/108	108/9206	0.0379305	0.0379305	0.342395	TLR6/STAT1/CXCL10/CXCL9	4
ssc05160	Hepatitis C	5/108	158/9206	0.0380191	0.0380191	0.342395	MX1/STAT1/RSAD2/IFIT1/CXCL10	5
ssc05166	Human T-cell leukemia virus 1 infection	6/108	225/9206	0.048735	0.048735	0.4158	TBPL1/MAD2L1/PTTG1/ANAPC10/CDC20/CHEK1	6
