# Supplementary material for: The Metabolic Pathway of Bile Secretion Is Vulnerable to Salmonella enterica Exposure in Porcine Intestinal Epithelial Cells
Source: Animals (Basel). 2024 Mar 3;14(5):789. doi: 10.3390/ani14050789 (PMC10931422; doi:10.3390/ani14050789)
Supplement: Supplementary file 1 [file animals-14-00789-s001.zip › Table S5. The differentially expressed genes in IPEC-J2 between the LPS-treated and control group .xlsx]

## Sheet: saveDEG_LPS_Nor
gene	baseMean	log2FoldChange	lfcSE	stat	pvalue	padj	change	Nor_1	Nor_2	Nor_3	Nor_4	LPS_1	LPS_2	LPS_3	LPS_4
43891	30.9965	-0.242782	0.415478	-0.584345	0.558988	0.751993	NOT	26	17	18	20	53	37	57	44
43892	218.719	-0.443613	0.262687	-1.68875	0.0912671	0.244619	NOT	189	135	174	115	261	313	306	372
43893	8.25649	-2.15918	1.11138	-1.94279	0.0520418	0.165916	NOT	19	5	9	0	7	10	5	0
43895	236.146	-0.598293	0.191443	-3.12517	0.00177703	0.0126643	NOT	189	137	216	155	351	343	306	290
43896	120.934	0.344808	0.229178	1.50454	0.132441	0.313531	NOT	59	58	84	60	262	301	174	207
43897	164.564	0.278106	0.231279	1.20247	0.229181	0.44496	NOT	72	69	139	89	317	409	272	259
43898	65.5994	-0.463897	0.29326	-1.58187	0.11368	0.283322	NOT	45	29	69	46	89	123	91	80
43899	17.0995	0.140056	0.745691	0.18782	0.851018	0.929655	NOT	21	9	1	7	40	50	11	27
44075	93.0483	1.11877	0.439673	2.54456	0.0109416	0.052379	NOT	21	50	42	28	259	139	332	123
44076	628.262	-0.141914	0.219881	-0.645414	0.518659	0.72184	NOT	497	258	463	399	1110	1150	764	1089
44077	6.6545	0.101336	0.94957	0.106718	0.915013	0.96116	NOT	6	3	0	6	12	5	12	16
44078	247.451	-1.24392	0.354783	-3.50615	0.000454644	0.00421971	DOWN	228	260	196	146	241	149	349	233
44079	55.0391	0.812758	0.403265	2.01544	0.0438584	0.147317	NOT	35	22	12	26	122	194	88	92
44080	105.301	0.511378	0.337994	1.51298	0.130285	0.309975	NOT	54	38	44	74	188	215	150	286
44081	318.22	-1.00488	0.217816	-4.61344	3.96066e-06	8.10398e-05	NOT	331	229	280	191	402	429	308	325
44082	350.523	-0.309537	0.198135	-1.56226	0.118227	0.290541	NOT	259	219	282	185	632	556	458	505
44083	1243.67	0.552276	0.181428	3.04406	0.00233412	0.0157548	NOT	533	511	804	629	3276	2779	1952	2240
44084	87.4631	-0.666169	0.296909	-2.24368	0.0248528	0.0971505	NOT	62	34	92	79	132	152	90	99
44085	205.561	0.29685	0.199049	1.49134	0.135872	0.319001	NOT	111	108	126	103	471	423	326	344
44086	5.41595	2.33674	1.65269	1.4139	0.157392	0.351394	NOT	1	3	0	0	1	0	39	15
A1CF	434.883	-0.36194	0.243743	-1.48492	0.137564	0.321461	NOT	228	313	348	298	471	1020	606	562
A2M	15.0602	0.0201436	0.642795	0.0313375	0.975	0.989399	NOT	12	6	6	12	52	14	19	19
A4GALT	127.98	0.622676	0.342401	1.81856	0.0689786	0.200759	NOT	57	53	46	86	288	237	172	354
A4GNT	442.164	0.988721	0.234777	4.21131	2.5389e-05	0.000393726	NOT	199	151	176	192	1256	1205	1030	603
AAAS	128.512	0.341693	0.233804	1.46145	0.143891	0.331292	NOT	64	59	69	83	231	307	208	245
AACS	70.3859	-0.283302	0.285974	-0.990655	0.321854	0.545912	NOT	37	49	65	38	121	115	94	106
AAED1	31.7073	0.0527711	0.515828	0.102304	0.918516	0.962261	NOT	15	11	18	32	79	50	22	71
AAGAB	146.84	0.524558	0.251186	2.08832	0.0367686	0.129996	NOT	92	50	93	61	291	317	315	262
AAK1	269.659	-0.296796	0.35185	-0.843531	0.398932	0.618526	NOT	104	249	199	160	253	403	503	460
AAMDC	161.879	1.52173	0.238932	6.36887	1.90424e-10	1.65519e-08	UP	42	44	75	45	368	501	413	371
AAMP	169.245	-0.354482	0.242592	-1.46123	0.143952	0.331383	NOT	131	71	124	139	260	314	202	252
AAR2	179.712	0.598818	0.196544	3.04674	0.00231336	0.0156503	NOT	91	71	101	86	355	476	337	331
AARS	335.837	-0.521039	0.22689	-2.29644	0.0216505	0.0874613	NOT	292	141	266	272	499	546	448	409
AARS2	183.247	-0.552416	0.298352	-1.85156	0.0640893	0.191242	NOT	79	112	228	125	281	367	233	165
AARSD1	496.126	0.652559	0.197032	3.31195	0.000926493	0.00745434	NOT	258	158	246	280	1150	1187	936	912
AASDH	69.1717	-0.115678	0.281775	-0.410534	0.681414	0.833492	NOT	36	34	66	42	113	125	110	108
AASDHPPT	64.7071	-0.438782	0.35478	-1.23677	0.216172	0.430448	NOT	43	62	40	32	133	98	73	76
AASS	4.72271	1.40538	1.06048	1.32523	0.185094	0.390853	NOT	1	3	0	2	9	24	8	8
AATF	121.684	0.654048	0.312765	2.09118	0.0365122	0.12931	NOT	33	37	99	68	271	277	222	253
AATK	10.7847	-0.42239	1.0622	-0.397655	0.690884	0.839228	NOT	11	0	3	16	16	13	1	32
ABAT	109.712	-1.13837	0.361109	-3.15242	0.00161923	0.0117334	NOT	129	63	79	94	139	70	139	110
ABCA1	50.3965	0.752087	0.568139	1.32377	0.185579	0.391656	NOT	10	23	58	5	78	178	106	83
ABCA2	328.732	0.212639	0.229501	0.92653	0.354171	0.577239	NOT	139	216	234	150	610	656	547	603
ABCA3	161.423	0.991879	0.371892	2.66711	0.00765057	0.0400168	NOT	48	88	97	30	479	543	218	285
ABCA5	216.701	0.521432	0.264768	1.96939	0.0489081	0.159454	NOT	73	100	135	127	398	561	510	297
ABCA6	11.1027	-0.517105	0.851223	-0.607485	0.543529	0.740405	NOT	8	0	11	14	34	11	11	8
ABCA7	357.223	-0.32685	0.328282	-0.995636	0.319427	0.543704	NOT	246	324	255	125	441	490	599	597
ABCB1	129.067	0.321165	0.409606	0.784082	0.432992	0.649215	NOT	35	60	99	89	178	269	398	128
ABCB10	89.6781	0.0152629	0.353645	0.0431589	0.965575	0.984667	NOT	27	53	81	59	171	260	113	100
ABCB6	82.7684	1.16495	0.454948	2.56062	0.0104484	0.0505972	NOT	13	48	41	21	179	320	222	88
ABCB7	66.2225	0.106793	0.320785	0.33291	0.739202	0.867991	NOT	54	30	47	25	138	130	92	114
ABCB8	107.752	0.0519669	0.438771	0.118437	0.905721	0.957464	NOT	88	15	62	96	223	277	161	115
ABCB9	29.2184	0.906543	0.592715	1.52947	0.126147	0.303113	NOT	16	20	4	7	34	71	62	88
ABCC1	22.0396	0.488195	0.458641	1.06444	0.287131	0.509518	NOT	13	9	15	8	43	47	33	53
ABCC10	213.717	0.15104	0.313607	0.481621	0.630075	0.801855	NOT	83	94	196	131	297	445	527	266
ABCC2	180.562	1.55145	0.424129	3.65797	0.000254216	0.00264153	UP	30	76	79	38	381	424	768	239
ABCC3	80.609	1.8606	0.519359	3.58249	0.000340339	0.00334756	UP	5	17	30	34	409	178	198	96
ABCC4	13.0578	1.40292	0.667148	2.10286	0.0354777	0.126798	UP	5	6	3	3	24	28	25	49
ABCC5	114.529	0.7662	0.37142	2.06289	0.039123	0.135781	NOT	58	46	63	40	408	177	272	132
ABCC6	34.8456	0.703169	0.6267	1.12202	0.261855	0.482312	NOT	15	2	25	25	42	101	122	32
ABCC8	4.93264	0.700948	1.14118	0.614229	0.539064	0.73724	NOT	6	0	0	3	9	21	6	8
ABCC9	5.83547	-1.5049	0.958765	-1.56963	0.116502	0.288206	NOT	8	0	9	5	3	7	4	7
ABCD1	602.429	1.26779	0.258816	4.89842	9.66094e-07	2.45845e-05	UP	152	273	257	171	1252	1605	1329	1613
ABCD3	176.935	0.112315	0.257109	0.436836	0.66223	0.822164	NOT	85	124	108	92	406	379	279	217
ABCD4	51.8027	0.668143	0.329974	2.02484	0.0428843	0.145029	NOT	23	18	36	22	109	160	102	76
ABCE1	148.047	-0.605482	0.291428	-2.07764	0.0377426	0.132171	NOT	104	127	76	117	249	258	139	174
ABCF1	266.52	-0.378158	0.199596	-1.89462	0.058143	0.179165	NOT	184	123	245	192	443	507	335	330
ABCF2	90.6766	-1.18516	0.358585	-3.30509	0.000949449	0.007576	NOT	121	38	62	85	118	100	78	86
ABCF3	254.605	0.0780925	0.211661	0.368951	0.712165	0.852971	NOT	113	127	216	155	416	564	429	398
ABCG1	17.9529	1.49861	0.770659	1.94458	0.0518256	0.1655	NOT	2	13	6	1	22	64	24	71
ABCG2	100.551	0.0709982	0.524507	0.135362	0.892326	0.950831	NOT	41	119	26	38	105	205	270	117
ABCG5	158.322	0.824143	0.434941	1.89484	0.0581137	0.179123	NOT	38	65	91	86	148	438	577	209
ABCG8	218.622	0.953065	0.322713	2.95329	0.00314404	0.0200845	NOT	63	91	159	57	398	686	570	346
ABHD1	18.4981	2.16075	0.75272	2.87058	0.00409716	0.0245227	UP	0	6	2	8	60	72	62	18
ABHD10	34.034	-0.778681	0.383016	-2.03302	0.0420501	0.142769	NOT	24	18	41	24	56	46	43	29
ABHD11	121.235	-0.684942	0.224692	-3.04837	0.0023009	0.0155963	NOT	92	89	91	89	151	189	157	142
ABHD12	80.7611	1.3857	0.335018	4.13619	3.53116e-05	0.000520325	UP	30	16	41	24	205	273	119	219
ABHD12B	13.1916	0.61762	0.677121	0.912126	0.361702	0.58416	NOT	3	7	6	9	18	15	31	40
ABHD13	58.946	0.805584	0.331873	2.42739	0.015208	0.0672664	NOT	27	27	37	14	143	140	125	108
ABHD14A	258.934	0.586159	0.215774	2.71653	0.00659693	0.0357713	NOT	116	102	127	158	558	624	554	408
ABHD14B	271.883	-0.187869	0.227615	-0.825382	0.409155	0.628131	NOT	159	188	211	145	585	524	337	330
ABHD15	3.3849	1.24404	1.26474	0.983636	0.325294	0.549569	NOT	0	2	3	0	12	4	6	10
ABHD16A	218.893	0.422518	0.308069	1.3715	0.170218	0.370514	NOT	77	161	140	72	394	565	432	345
ABHD17A	991.914	0.53301	0.167632	3.17964	0.00147459	0.0108539	NOT	424	519	532	485	2247	2464	1769	1660
ABHD17B	105.316	-0.26562	0.290588	-0.914076	0.360677	0.583113	NOT	88	70	67	52	181	221	162	104
ABHD17C	145.585	0.278276	0.340727	0.816712	0.414093	0.632463	NOT	48	70	144	67	416	322	168	216
ABHD18	24.4019	-1.21441	0.466416	-2.6037	0.00922227	0.0459984	DOWN	19	8	28	30	29	29	23	21
ABHD2	144.937	1.44466	0.404351	3.5728	0.000353191	0.00344333	UP	34	58	21	70	309	311	359	440
ABHD3	47.6332	0.736911	0.419535	1.75649	0.079004	0.222124	NOT	19	32	13	20	93	126	123	67
ABHD4	118.426	2.08545	0.278435	7.48988	6.89378e-14	2.00666e-11	UP	31	25	32	22	359	367	360	234
ABHD5	37.4835	-0.834825	0.61345	-1.36087	0.173555	0.374981	NOT	21	40	19	33	53	37	84	8
ABHD6	188.001	0.934403	0.349462	2.67384	0.00749891	0.0393166	NOT	53	117	96	44	508	518	436	256
ABHD8	18.6472	0.53215	0.642871	0.827772	0.4078	0.626958	NOT	2	6	22	9	22	40	37	50
ABI1	211.356	-0.800196	0.280993	-2.84774	0.00440306	0.0258993	NOT	231	157	158	101	315	326	208	224
ABI2	22.5663	0.191021	0.561283	0.340329	0.733609	0.865401	NOT	14	9	25	5	33	45	24	62
ABI3BP	98.7883	1.01245	0.518654	1.95206	0.0509306	0.163621	NOT	56	38	13	47	132	307	95	370
ABL1	361.655	-0.227556	0.230713	-0.986317	0.323977	0.548277	NOT	298	191	235	222	578	677	399	642
ABL2	72.414	0.222471	0.391858	0.567733	0.570216	0.760419	NOT	26	16	78	50	146	147	133	112
ABLIM1	392.7	0.611249	0.300975	2.0309	0.0422655	0.143397	NOT	204	219	224	104	679	889	1047	616
ABLIM2	22.6638	-0.184735	0.564623	-0.327183	0.74353	0.870386	NOT	8	20	17	13	36	44	12	54
ABLIM3	22.1073	-0.426562	0.567813	-0.751236	0.452511	0.666658	NOT	17	14	20	11	42	29	9	49
ABO	14.0621	-0.0420614	1.01147	-0.0415843	0.96683	0.985343	NOT	0	6	3	25	26	17	46	4
ABR	619.256	0.234559	0.153542	1.52766	0.126598	0.303914	NOT	348	266	424	357	1167	1442	983	1047
ABRACL	118.48	-1.57204	0.327072	-4.80641	1.53663e-06	3.69173e-05	DOWN	109	75	128	123	135	76	130	64
ABRAXAS1	44.8346	-0.186219	0.405343	-0.459412	0.645939	0.811659	NOT	30	26	19	39	63	68	97	55
ABRAXAS2	60.173	-0.120374	0.343945	-0.34998	0.726353	0.860896	NOT	27	35	45	46	110	148	96	53
ABT1	105.607	-0.834471	0.303289	-2.75141	0.00593394	0.0329068	NOT	101	64	105	62	182	111	97	130
ABTB1	76.7723	-0.470681	0.339441	-1.38664	0.165553	0.362963	NOT	61	67	36	47	113	163	97	78
ABTB2	16.3127	3.37238	0.758131	4.44828	8.65609e-06	0.000157191	UP	4	0	1	2	60	59	32	55
ACAA1	901.777	0.76207	0.258315	2.95016	0.00317612	0.0202143	NOT	332	500	434	341	1749	2101	2459	1427
ACAA2	72.2679	-0.619416	0.290197	-2.13447	0.0328044	0.119575	NOT	55	54	46	55	98	95	103	91
ACACA	223.093	0.592131	0.238874	2.47885	0.0131808	0.0604604	NOT	114	81	157	88	570	562	314	425
ACACB	30.2303	-0.780411	0.781899	-0.998097	0.318232	0.542615	NOT	35	32	24	0	25	49	17	61
ACAD10	144.228	0.0955673	0.33648	0.284021	0.776394	0.888538	NOT	49	79	159	62	226	346	283	180
ACAD11	63.1278	-0.353571	0.378861	-0.933246	0.350693	0.574111	NOT	23	44	49	56	62	144	105	74
ACAD8	157.675	-0.434832	0.267262	-1.62699	0.10374	0.266898	NOT	113	111	117	97	198	206	280	218
ACAD9	156.002	0.628965	0.294045	2.13901	0.0324351	0.118525	NOT	55	97	92	52	307	464	320	232
ACADL	122.984	-1.22503	0.296479	-4.13193	3.59724e-05	0.00052755	DOWN	120	105	117	75	134	98	147	117
ACADM	244.201	-1.28111	0.313256	-4.08965	4.32019e-05	0.00061043	DOWN	257	148	255	189	328	155	293	184
ACADS	330.305	0.33649	0.227397	1.47975	0.138941	0.323554	NOT	175	140	189	207	766	642	688	438
ACADSB	196.951	0.433145	0.377745	1.14666	0.251523	0.470393	NOT	130	134	63	67	530	398	207	428
ACADVL	762.202	0.232867	0.235008	0.990886	0.321741	0.545891	NOT	346	420	404	519	1324	1503	1701	1090
ACAP1	144.654	1.34323	0.495336	2.71175	0.00669284	0.0361437	UP	25	87	63	20	230	242	542	349
ACAP2	136.416	0.022339	0.258292	0.0864875	0.931079	0.968151	NOT	84	59	98	91	301	291	223	146
ACAP3	71.2658	-0.150374	0.341865	-0.439864	0.660036	0.820576	NOT	65	36	38	42	120	193	87	80
ACAT1	201.007	-1.02788	0.205811	-4.99428	5.90548e-07	1.59086e-05	NOT	196	134	176	150	240	259	189	223
ACAT2	198.805	0.14649	0.244946	0.598051	0.549806	0.745082	NOT	123	100	106	127	495	380	260	313
ACBD3	94.1633	-1.81183	0.35308	-5.1315	2.8744e-07	8.66914e-06	DOWN	48	110	107	89	78	54	81	68
ACBD4	41.9018	-0.306664	0.457903	-0.669714	0.50304	0.70974	NOT	17	42	25	26	53	128	40	48
ACBD5	221.782	-0.182266	0.289961	-0.628587	0.529619	0.730718	NOT	193	80	134	168	448	455	319	233
ACBD6	120.423	0.483197	0.313749	1.54008	0.123542	0.299467	NOT	58	28	71	91	240	338	194	210
ACCS	15.4156	0.695113	0.619025	1.12292	0.261473	0.481838	NOT	15	2	8	4	30	38	32	31
ACCSL	2.82918	2.64256	1.55961	1.69437	0.0901954	0.242907	NOT	0	0	2	0	9	9	13	3
ACD	111.125	0.0846427	0.345597	0.244917	0.806521	0.906291	NOT	51	75	44	86	228	151	211	181
ACE	2162.35	-0.0642314	0.786628	-0.0816542	0.934922	0.969836	NOT	745	2136	1028	1275	363	6200	3628	4369
ACE2	1268.3	0.448153	0.36774	1.21867	0.222969	0.437623	NOT	333	1060	651	494	1920	2538	3399	2026
ACER1	3.1544	-2.34744	1.59701	-1.4699	0.14159	0.327897	NOT	5	0	9	0	2	1	4	0
ACER3	53.877	0.242775	0.462567	0.524844	0.599692	0.781407	NOT	24	26	12	55	91	106	79	121
ACHE	26.1058	1.63731	0.697264	2.34819	0.0188647	0.0789491	UP	11	5	8	7	61	111	7	100
ACIN1	634.359	0.0663056	0.23207	0.285713	0.775098	0.887616	NOT	327	358	511	323	894	1208	1372	937
ACKR1	16.1585	0.656377	0.674462	0.973185	0.330461	0.554244	NOT	12	2	16	2	42	32	22	40
ACKR2	8.73686	1.95408	1.14316	1.70936	0.0873838	0.237938	NOT	0	0	3	6	50	5	32	7
ACKR3	46.3827	0.793526	0.531991	1.49162	0.1358	0.319001	NOT	8	33	30	11	159	82	48	115
ACKR4	50.6041	-0.625815	0.403194	-1.55214	0.120628	0.295076	NOT	22	42	59	28	64	69	93	45
ACLY	278.389	0.243504	0.252147	0.965722	0.334183	0.558609	NOT	207	128	128	151	669	623	426	387
ACO1	391.955	-0.736515	0.201486	-3.65541	0.000256767	0.00266624	NOT	341	229	276	341	543	653	423	427
ACO2	1226	-0.224008	0.250735	-0.893405	0.37164	0.593609	NOT	761	855	648	892	1997	3225	1377	1446
ACOD1	13.8529	-3.42743	1.19197	-2.87544	0.00403465	0.024233	DOWN	7	21	0	30	3	0	11	1
ACOT11	351.169	0.47957	0.308813	1.55295	0.120436	0.294804	NOT	129	187	216	181	392	875	931	585
ACOT12	16.7182	-0.730467	0.72339	-1.00978	0.312599	0.536796	NOT	9	23	5	11	12	42	29	6
ACOT13	116.282	0.014998	0.284822	0.0526573	0.958005	0.980632	NOT	71	88	56	60	213	230	205	156
ACOT6	18.0909	0.352752	0.722264	0.488398	0.625268	0.798705	NOT	20	0	7	12	45	39	35	22
ACOT7	98.2599	-0.50307	0.293112	-1.71631	0.0861057	0.235834	NOT	60	70	89	62	195	119	140	103
ACOT8	282.821	0.701094	0.301078	2.32861	0.0198795	0.0820858	NOT	100	173	177	72	608	744	621	450
ACOT9	127.915	-0.547441	0.336103	-1.62879	0.103357	0.266302	NOT	101	77	85	104	138	163	271	126
ACOX1	572.537	0.169343	0.207491	0.816148	0.414416	0.632643	NOT	356	317	299	325	895	1324	1109	850
ACOX2	108.365	0.107175	0.3663	0.292588	0.769837	0.884382	NOT	31	62	86	77	165	357	167	115
ACOX3	33.529	0.0409644	0.638346	0.0641728	0.948833	0.975957	NOT	2	43	19	13	52	74	55	53
ACP1	434.501	0.581257	0.197714	2.93989	0.00328327	0.0208191	NOT	215	149	271	222	1093	1150	733	670
ACP2	556.286	1.14302	0.285369	4.00542	6.19063e-05	0.000813085	NOT	145	255	295	150	1125	2123	1226	924
ACP5	133.18	1.00652	0.42028	2.39487	0.0166262	0.071937	NOT	43	74	72	25	408	236	409	156
ACP6	226.859	-0.0749584	0.355683	-0.210745	0.833086	0.92193	NOT	155	198	128	71	412	474	437	211
ACPT	41.7532	0.170826	0.397564	0.429683	0.667426	0.825321	NOT	14	26	32	24	74	119	77	42
ACRBP	18.2355	-0.228365	0.665196	-0.343305	0.731369	0.864589	NOT	4	19	14	10	10	35	47	21
ACSBG1	20.6505	-0.681854	0.644942	-1.05723	0.290405	0.513555	NOT	15	12	30	7	7	42	19	41
ACSF2	525.406	-0.50958	0.243179	-2.09549	0.0361272	0.128408	NOT	395	439	366	279	683	957	813	545
ACSF3	294.094	0.767785	0.290451	2.64342	0.00820726	0.0422572	NOT	114	65	212	155	860	762	480	491
ACSL1	46.9056	-0.284704	0.517881	-0.549747	0.582493	0.768852	NOT	22	15	21	67	124	81	50	43
ACSL3	319.996	1.00591	0.302821	3.3218	0.000894389	0.00724502	NOT	73	166	172	105	840	711	833	536
ACSL4	92.9884	-0.683922	0.342282	-1.99812	0.0457034	0.151754	NOT	69	32	100	85	163	126	128	77
ACSL5	813.768	0.941795	0.261797	3.59742	0.000321388	0.0031916	NOT	213	375	350	405	1391	2230	1992	1708
ACSS1	557.741	0.0301355	0.195122	0.154444	0.87726	0.943287	NOT	305	297	466	289	1119	1040	733	988
ACSS2	222.655	-0.736142	0.248881	-2.9578	0.00309839	0.0198338	NOT	190	92	201	203	306	378	258	223
ACSS3	61.8711	-2.20078	0.421387	-5.22271	1.76326e-07	5.61831e-06	DOWN	48	90	70	35	58	37	21	37
ACTA1	9.3282	1.1156	1.18884	0.938391	0.348043	0.571406	NOT	3	10	0	0	2	40	16	30
ACTA2	623.74	-1.31359	0.260836	-5.03607	4.75192e-07	1.32711e-05	DOWN	595	378	665	548	709	627	351	767
ACTB	30239.3	0.71351	0.2003	3.5622	0.000367763	0.00356518	NOT	15361	11009	14298	15017	72736	55172	63296	63397
ACTC1	49.4255	0.149745	0.479717	0.312152	0.754925	0.876761	NOT	23	12	68	18	62	108	75	111
ACTG1	8097.11	-0.427312	0.170284	-2.5094	0.0120935	0.0566487	NOT	5746	4953	5610	6177	13373	13040	9133	12015
ACTG2	3252.24	-0.857268	0.424101	-2.02137	0.043241	0.145852	NOT	2603	1809	2114	3611	2856	5269	1104	6671
ACTL6A	34.0331	-0.64881	0.524852	-1.23618	0.216393	0.430614	NOT	43	7	16	35	59	59	32	36
ACTL6B	8.65043	0.0312263	1.32355	0.0235929	0.981177	0.991946	NOT	0	16	3	0	5	5	4	41
ACTN1	283.054	-0.283733	0.377963	-0.750689	0.45284	0.666874	NOT	236	119	175	226	346	532	183	686
ACTN2	92.5431	0.94339	0.575299	1.63983	0.101041	0.262345	NOT	56	8	36	56	191	226	52	361
ACTN4	703.455	0.0471507	0.230972	0.204141	0.838244	0.924069	NOT	543	305	404	428	1567	1135	1067	1127
ACTR10	160.523	-0.693968	0.221003	-3.14008	0.001689	0.0121432	NOT	129	93	154	111	216	227	171	227
ACTR1A	995.425	0.961078	0.219061	4.38727	1.14783e-05	0.000200945	NOT	442	226	538	467	2524	2695	1836	2058
ACTR1B	48.2899	-1.43971	0.340371	-4.22984	2.33861e-05	0.000368838	DOWN	52	38	37	43	57	54	41	29
ACTR2	891.547	-0.675499	0.254484	-2.65438	0.00794532	0.0411509	NOT	951	500	585	614	1435	1041	1102	1100
ACTR3	601.703	-0.669473	0.217066	-3.08419	0.00204105	0.0141293	NOT	388	502	416	465	965	772	709	735
ACTR3B	33.9478	1.0174	0.390332	2.6065	0.00914715	0.0457713	NOT	14	9	16	16	63	99	84	67
ACTR5	70.2326	0.55226	0.339951	1.62453	0.104263	0.267669	NOT	35	23	43	39	117	176	188	93
ACTR6	57.3438	-0.154087	0.331264	-0.465148	0.641826	0.809648	NOT	53	30	33	30	92	132	71	84
ACTR8	52.2927	0.0295925	0.4403	0.0672098	0.946415	0.974781	NOT	29	49	19	24	87	109	116	51
ACVR1	38.8556	0.300238	0.371193	0.808846	0.418604	0.636775	NOT	17	18	32	19	74	91	48	84
ACVR1B	91.537	1.77951	0.356083	4.99747	5.80885e-07	1.57675e-05	UP	15	27	42	18	300	362	194	150
ACVR1C	5.10521	3.00984	1.44058	2.08932	0.036679	0.129803	UP	0	0	3	0	29	33	3	4
ACVR2A	14.5919	0.773282	0.592623	1.30485	0.191945	0.398573	NOT	6	4	12	5	27	46	39	17
ACVR2B	20.3335	-0.244087	0.635677	-0.38398	0.700993	0.845133	NOT	8	2	22	24	24	59	24	26
ACVRL1	49.1939	0.685597	0.42787	1.60235	0.109078	0.276213	NOT	15	29	27	20	111	79	67	150
ACY1	166.674	-0.287238	0.280273	-1.02485	0.305434	0.529428	NOT	99	131	100	108	306	242	296	181
ACYP1	72.1559	0.388294	0.325645	1.19238	0.233111	0.449307	NOT	25	37	44	46	104	170	123	162
ACYP2	22.8484	-0.213837	0.493352	-0.433436	0.664698	0.823263	NOT	15	14	26	6	44	50	23	32
ADA	864.479	5.56703	0.720621	7.72532	1.11576e-14	3.83622e-12	UP	20	19	45	6	4416	1553	4509	941
ADA2	8.80038	-2.66342	0.870568	-3.05941	0.00221774	0.0151492	DOWN	3	12	20	3	4	2	6	4
ADAL	55.3477	0.512814	0.417589	1.22804	0.219433	0.434351	NOT	43	18	13	35	108	142	116	84
ADAM10	28.1079	-1.88928	0.616777	-3.06314	0.00219026	0.0150145	DOWN	19	36	29	22	39	8	28	6
ADAM11	2.17191	2.99519	1.72485	1.73649	0.0824774	0.228927	NOT	0	0	1	0	9	5	1	12
ADAM15	582.823	0.000888439	0.262988	0.00337825	0.997305	0.998595	NOT	306	478	316	284	915	1042	993	1015
ADAM17	64.8069	0.208877	0.30333	0.688614	0.491066	0.699903	NOT	32	25	40	50	124	130	100	123
ADAM19	55.1806	-0.22059	0.383471	-0.575246	0.565125	0.756761	NOT	30	41	24	46	97	81	61	107
ADAM22	3.26031	-0.187569	1.25291	-0.149706	0.880996	0.945531	NOT	4	0	5	0	4	6	7	4
ADAM23	18.4309	-0.585346	0.513412	-1.14011	0.254241	0.4741	NOT	12	16	20	6	24	24	26	26
ADAM28	13.2686	-0.135559	0.863152	-0.157052	0.875204	0.942104	NOT	3	13	15	3	11	27	45	3
ADAM33	126.422	-0.2734	0.509806	-0.536282	0.591764	0.775847	NOT	44	125	46	108	78	251	121	324
ADAM8	5.41315	0.0955924	1.02223	0.0935139	0.925495	0.965495	NOT	1	5	0	6	7	8	10	12
ADAM9	11.2998	-0.438841	0.712156	-0.616216	0.537752	0.735867	NOT	13	7	5	6	24	11	24	6
ADAMDEC1	318.526	-2.35102	0.218139	-10.7776	4.39041e-27	1.69821e-23	DOWN	320	238	442	315	243	203	149	132
ADAMTS1	20.8246	0.102991	0.815485	0.126294	0.8995	0.954512	NOT	31	4	11	3	37	15	13	76
ADAMTS10	25.799	-0.808281	0.557148	-1.45075	0.14685	0.335785	NOT	5	28	23	23	29	56	17	31
ADAMTS12	26.7486	-0.142508	0.441739	-0.322608	0.746992	0.872116	NOT	12	17	18	21	31	63	31	51
ADAMTS13	2.56845	0.0479684	1.88652	0.0254269	0.979714	0.991454	NOT	6	0	0	0	2	7	0	9
ADAMTS14	8.61278	-0.898749	0.906159	-0.991822	0.321284	0.545419	NOT	16	0	8	4	7	20	7	9
ADAMTS15	104.721	-0.35743	0.306919	-1.16457	0.244192	0.462354	NOT	66	44	97	84	190	118	163	150
ADAMTS16	4.18873	2.66495	1.31053	2.03349	0.0420032	0.142704	UP	0	0	3	0	14	16	8	13
ADAMTS17	4.62866	-0.503887	1.26098	-0.399599	0.689452	0.83855	NOT	4	0	0	9	9	5	2	10
ADAMTS19	52.239	-0.0868583	0.441656	-0.196665	0.84409	0.926875	NOT	18	58	33	18	84	96	80	86
ADAMTS2	17.2194	0.799158	0.791951	1.0091	0.312926	0.53712	NOT	0	16	4	9	49	53	15	37
ADAMTS20	3.08316	-1.39545	1.17851	-1.18408	0.236383	0.453248	NOT	5	0	2	4	4	4	2	2
ADAMTS3	15.4953	0.432369	0.733768	0.589244	0.555697	0.749586	NOT	13	1	4	14	17	34	22	47
ADAMTS4	8.5165	-1.47736	1.10785	-1.33353	0.182357	0.387133	NOT	9	0	13	10	14	1	1	14
ADAMTS5	19.2205	0.272366	0.710946	0.383104	0.701643	0.845732	NOT	13	15	14	0	39	50	17	41
ADAMTS6	36.805	1.16188	0.556622	2.08737	0.0368545	0.13011	NOT	5	8	38	8	57	121	90	84
ADAMTS7	29.7351	0.122097	0.44992	0.271374	0.786103	0.894308	NOT	11	20	21	17	48	53	34	75
ADAMTS8	19.224	2.13186	0.765883	2.78354	0.00537699	0.0304513	UP	9	5	3	0	28	63	29	91
ADAMTS9	24.3642	-1.05906	0.454261	-2.33139	0.0197328	0.0816762	NOT	24	14	20	22	28	19	33	26
ADAMTSL1	9.41476	1.94827	0.973283	2.00175	0.0453112	0.150751	UP	4	0	6	0	27	39	7	33
ADAMTSL2	21.6788	-0.0779966	0.832758	-0.0936606	0.925379	0.965495	NOT	3	22	28	2	19	56	8	63
ADAMTSL3	13.8638	0.540416	1.00089	0.539938	0.58924	0.773993	NOT	5	1	0	21	28	41	6	40
ADAMTSL4	24.7809	0.261307	0.561944	0.465005	0.641928	0.809668	NOT	19	21	10	3	51	50	48	36
ADAMTSL5	35.66	0.289861	0.698303	0.415093	0.678074	0.831246	NOT	2	32	39	6	67	36	86	70
ADAP1	179.758	-0.426845	0.292656	-1.45852	0.144696	0.332454	NOT	88	167	141	99	286	289	294	185
ADAP2	44.3126	-0.633121	0.3578	-1.76949	0.0768129	0.217466	NOT	35	29	43	25	66	68	71	35
ADAR	301.678	0.119448	0.215507	0.554266	0.579397	0.767043	NOT	156	159	235	159	620	493	463	564
ADARB1	50.4473	0.195521	0.367656	0.531804	0.594862	0.777979	NOT	17	32	41	25	86	93	74	113
ADARB2	5.70171	0.253065	1.29723	0.195081	0.845329	0.927452	NOT	0	0	3	10	5	36	4	3
ADAT1	11.2726	-1.01256	0.901006	-1.12382	0.261091	0.481685	NOT	0	13	22	3	14	20	13	6
ADAT2	62.8857	0.241749	0.387036	0.624617	0.532222	0.732155	NOT	29	36	35	39	80	127	177	77
ADAT3	10.938	-0.292562	0.620128	-0.471776	0.637086	0.805969	NOT	4	4	11	11	18	19	18	13
ADCK1	7.24516	0.298307	1.14593	0.260319	0.794618	0.899234	NOT	7	0	10	0	16	17	21	2
ADCK2	59.4914	0.694437	0.344869	2.01362	0.0440489	0.14773	NOT	36	28	30	16	137	150	87	134
ADCK5	1201.97	-0.0412781	0.350844	-0.117654	0.906342	0.957523	NOT	459	1031	760	659	1277	2261	3058	1417
ADCY1	6.20228	0.655962	1.03928	0.631171	0.527929	0.729166	NOT	0	5	7	0	16	16	13	8
ADCY2	5.4801	-0.947547	1.06856	-0.886748	0.375214	0.597091	NOT	10	2	0	5	13	5	3	5
ADCY3	21.0871	-0.803463	0.490225	-1.63897	0.10122	0.262618	NOT	11	13	15	26	30	30	16	30
ADCY4	175.814	-0.795429	0.80906	-0.983153	0.325532	0.549731	NOT	142	125	58	202	63	98	142	514
ADCY5	77.9485	0.451567	0.4034	1.1194	0.262969	0.4835	NOT	54	21	54	34	106	143	118	236
ADCY6	260.569	0.251351	0.325933	0.771174	0.440604	0.656177	NOT	68	96	246	187	464	694	432	391
ADCY7	20.0237	2.1615	0.678155	3.18732	0.00143598	0.0105999	UP	8	0	4	6	78	46	71	29
ADCY8	4.11082	3.13457	1.34019	2.33891	0.0193402	0.0803091	UP	1	1	0	0	11	14	9	16
ADCY9	182.7	1.63219	0.323912	5.039	4.67983e-07	1.31733e-05	UP	25	55	100	42	484	600	414	419
ADCYAP1R1	10.6227	0.834025	0.780701	1.0683	0.285384	0.507415	NOT	8	3	0	7	21	35	22	17
ADD1	427.176	0.161354	0.230193	0.700952	0.483333	0.692916	NOT	270	196	263	253	879	1049	451	779
ADD3	338.265	-1.15988	0.209235	-5.54342	2.96622e-08	1.19514e-06	NOT	321	250	364	209	437	423	296	297
ADGB	5.37481	-0.862722	1.04134	-0.828476	0.407401	0.626696	NOT	9	0	3	5	7	6	11	2
ADGRA2	98.8053	0.446609	0.454579	0.982467	0.32587	0.549944	NOT	59	30	42	72	204	247	56	283
ADGRA3	163.02	1.31659	0.363699	3.61999	0.000294613	0.00297799	UP	41	20	111	66	388	479	417	322
ADGRB1	48.2107	0.834994	0.652167	1.28034	0.200426	0.409643	NOT	3	40	31	9	121	128	34	145
ADGRB2	8.8072	0.697726	1.02819	0.678597	0.497393	0.705313	NOT	3	1	14	0	14	38	4	23
ADGRD1	58.0214	0.667894	0.448281	1.4899	0.136251	0.319648	NOT	31	24	30	24	77	201	49	171
ADGRE1	1.7909	-1.88922	2.11133	-0.894799	0.370895	0.592757	NOT	0	6	0	0	1	1	0	3
ADGRE5	160.883	0.90896	0.310484	2.92756	0.0034163	0.0214343	NOT	52	46	63	111	433	343	295	365
ADGRF1	32.5423	0.511094	0.578621	0.883296	0.377076	0.599047	NOT	6	9	25	27	34	76	110	39
ADGRF2	12.2634	0.617175	0.704138	0.876497	0.38076	0.602409	NOT	8	4	2	9	23	16	20	39
ADGRF5	25.0965	0.893765	0.555951	1.60763	0.107915	0.274094	NOT	12	14	3	12	67	37	52	62
ADGRG1	320.429	0.570328	0.296792	1.92164	0.0546506	0.17193	NOT	78	191	196	160	690	723	735	482
ADGRG3	5.9689	0.464204	1.24303	0.373446	0.708817	0.851416	NOT	0	9	0	2	4	6	18	16
ADGRG5	8.99652	0.291208	0.955348	0.304819	0.760504	0.879674	NOT	5	12	0	1	13	16	20	17
ADGRG6	16.945	0.735011	0.553505	1.32792	0.184204	0.389611	NOT	3	6	16	7	34	42	36	34
ADGRG7	263.555	1.12694	0.31246	3.60666	0.000310169	0.0031061	NOT	72	57	192	98	595	825	678	417
ADGRL1	147.022	0.0455809	0.424637	0.107341	0.914518	0.961098	NOT	71	107	89	80	158	321	103	435
ADGRL2	54.5375	-0.0904143	0.41369	-0.218556	0.826996	0.918805	NOT	26	32	60	22	145	89	48	86
ADGRL3	7.99522	0.150736	1.02647	0.146849	0.883251	0.946572	NOT	12	1	0	5	8	33	14	6
ADGRL4	27.1691	1.01381	0.588908	1.7215	0.0851602	0.23424	NOT	21	2	16	6	45	69	49	84
ADH1C	24.2338	-1.27187	0.889367	-1.43008	0.152694	0.344838	NOT	19	47	0	10	40	10	22	23
ADH4	28.4878	2.22778	0.50779	4.38722	1.14811e-05	0.000200945	UP	3	2	10	10	91	95	61	79
ADH5	315.227	-0.960854	0.183352	-5.2405	1.60142e-07	5.2053e-06	NOT	264	207	306	242	408	469	347	266
ADHFE1	5.69313	0.665869	0.964621	0.690291	0.490011	0.698881	NOT	4	2	5	0	7	20	6	16
ADI1	559.427	-0.00992123	0.163584	-0.0606493	0.951639	0.977495	NOT	358	268	369	373	969	1248	840	817
ADIPOR1	139.986	1.05489	0.267767	3.93957	8.16278e-05	0.00101874	NOT	50	44	70	59	406	271	272	337
ADIPOR2	103.875	0.197541	0.358601	0.550865	0.581726	0.768659	NOT	45	61	36	88	204	175	224	150
ADIRF	26.7365	0.557464	0.529528	1.05276	0.292453	0.515717	NOT	14	8	7	23	87	53	31	50
ADK	73.9947	-0.74281	0.430602	-1.72505	0.0845185	0.233013	NOT	68	75	63	16	122	100	84	76
ADM	35.263	1.01939	0.44144	2.30924	0.0209304	0.0852872	NOT	22	7	15	13	80	67	72	99
ADM5	8.92748	1.17742	0.871422	1.35115	0.176647	0.379398	NOT	2	7	4	0	28	33	8	19
ADNP	199.32	0.0767071	0.309865	0.24755	0.804483	0.905114	NOT	94	61	218	118	401	414	242	362
ADNP2	45.519	-0.289941	0.436999	-0.663483	0.507022	0.712867	NOT	26	40	45	11	88	92	45	62
ADO	75.1091	-0.963838	0.442513	-2.1781	0.0293984	0.110187	NOT	118	23	63	40	113	80	84	72
ADORA2A	21.1152	0.638058	0.561396	1.13656	0.255724	0.47572	NOT	4	18	9	8	42	56	27	52
ADPGK	39.0101	0.962506	0.470071	2.04758	0.0406014	0.139411	NOT	11	14	7	31	92	108	75	81
ADPRH	54.9691	0.732556	0.544629	1.34506	0.178607	0.381739	NOT	15	7	66	20	71	111	157	121
ADPRHL2	140.549	0.391953	0.226908	1.72736	0.0841022	0.232167	NOT	84	52	81	80	319	306	247	230
ADPRM	412.442	0.601516	0.246993	2.43535	0.0148772	0.0662162	NOT	132	209	230	224	691	1016	965	731
ADRA1A	16.6947	-0.0863473	0.945285	-0.0913452	0.927218	0.966285	NOT	0	14	29	1	31	32	10	39
ADRA2A	2.58165	0.74517	1.33101	0.559851	0.575581	0.764083	NOT	2	0	3	0	8	7	3	5
ADRA2C	5.83952	0.689559	1.14582	0.601807	0.547303	0.743187	NOT	0	7	0	3	12	18	4	16
ADRB2	14.6226	0.00327557	0.710845	0.00460799	0.996323	0.998453	NOT	7	5	11	13	24	19	6	49
ADRM1	551.309	0.370908	0.187343	1.97983	0.0477223	0.156598	NOT	263	234	385	300	1073	1228	823	1153
ADSL	113.722	0.264795	0.363751	0.727958	0.466639	0.678778	NOT	37	77	90	48	157	286	278	135
ADSS	79.9993	-0.866698	0.341631	-2.53694	0.0111826	0.053236	NOT	88	59	40	59	120	98	97	74
ADSSL1	6.18599	-1.01006	1.07363	-0.940787	0.346814	0.570164	NOT	0	8	1	10	5	5	6	11
ADTRP	49.3671	0.200073	0.445358	0.44924	0.653259	0.816019	NOT	12	28	41	32	117	81	46	117
AEBP1	107.999	0.675047	0.317067	2.12904	0.0332511	0.120596	NOT	34	59	43	63	252	249	156	255
AEBP2	102.941	-0.453007	0.274253	-1.65178	0.0985788	0.258073	NOT	91	53	83	64	158	203	97	149
AEN	132.958	0.271617	0.338418	0.802608	0.422201	0.639669	NOT	58	29	110	105	276	316	190	231
AES	958.214	-0.00603766	0.195458	-0.0308899	0.975357	0.989579	NOT	611	536	710	485	1798	1909	1133	1763
AFAP1	45.5522	0.209893	0.536996	0.390865	0.695897	0.842007	NOT	31	29	36	7	139	48	99	46
AFAP1L1	36.0559	-0.684	0.530177	-1.29013	0.197004	0.404989	NOT	35	42	12	14	44	62	59	26
AFAP1L2	26.2643	-1.2249	0.512138	-2.39173	0.016769	0.0724113	DOWN	25	31	17	14	41	40	18	13
AFDN	601.082	0.203741	0.243324	0.837325	0.40241	0.622056	NOT	370	200	523	301	896	1447	1070	1028
AFF1	121.978	-0.0881467	0.269794	-0.326719	0.743881	0.870468	NOT	52	73	101	82	202	310	177	144
AFF2	4.20692	-0.557051	1.32323	-0.420977	0.673772	0.82906	NOT	5	0	0	7	13	5	1	5
AFF3	13.2842	0.528856	1.00326	0.527137	0.598098	0.779856	NOT	11	0	0	15	20	20	43	21
AFF4	247.467	-0.32332	0.320438	-1.009	0.312977	0.537147	NOT	282	86	151	151	371	403	383	346
AFG1L	39.4916	0.0936162	0.459443	0.20376	0.838541	0.924134	NOT	19	8	29	39	97	84	64	41
AFG3L2	240.745	0.110023	0.193629	0.568218	0.569887	0.760089	NOT	159	110	144	150	431	526	367	403
AFMID	100.62	-0.295252	0.444059	-0.664894	0.506118	0.712396	NOT	71	19	50	131	173	181	138	133
AFTPH	238.586	-0.0343377	0.280755	-0.122305	0.902658	0.956239	NOT	197	141	103	135	533	459	341	305
AGA	26.6108	1.04786	0.561565	1.86597	0.0620453	0.18731	NOT	9	16	8	8	51	61	102	28
AGAP1	152.033	-0.209351	0.301148	-0.695178	0.486943	0.696104	NOT	151	85	76	79	239	281	192	257
AGAP2	16.6287	0.473657	0.545597	0.868145	0.385315	0.60582	NOT	5	12	6	10	43	31	30	28
AGAP3	134.497	0.401821	0.385953	1.04111	0.297823	0.521561	NOT	89	44	112	44	249	307	123	373
AGBL2	16.7262	-0.472984	0.793212	-0.596289	0.550982	0.746153	NOT	18	5	27	0	20	35	26	17
AGBL3	5.76912	-0.12368	0.933118	-0.132545	0.894553	0.952417	NOT	5	4	0	5	8	17	6	8
AGBL4	6.64181	-0.315979	0.883096	-0.357808	0.720487	0.857754	NOT	0	6	7	5	10	9	7	14
AGBL5	66.6469	0.183701	0.40685	0.451521	0.651614	0.814952	NOT	44	24	63	25	79	194	150	73
AGER	18.4814	-1.06848	0.740966	-1.44201	0.149298	0.339199	NOT	10	21	18	11	3	10	27	36
AGFG1	314.325	-0.366085	0.216449	-1.69132	0.0907752	0.243832	NOT	268	175	264	159	504	537	465	387
AGFG2	55.9109	-0.0522012	0.445485	-0.117178	0.906719	0.957742	NOT	41	14	49	38	71	138	44	129
AGGF1	107.467	-0.779065	0.302165	-2.57828	0.00992942	0.0486472	NOT	113	52	114	57	146	174	132	99
AGK	53.6594	-0.307041	0.373092	-0.822962	0.41053	0.629381	NOT	52	20	42	32	108	110	73	47
AGL	78.4649	0.837867	0.372444	2.24965	0.0244715	0.0961947	NOT	22	42	26	44	144	179	135	223
AGMAT	578.125	0.0993674	0.334783	0.296812	0.76661	0.882777	NOT	241	430	467	218	730	1259	1433	667
AGMO	5.31174	-0.472441	1.30816	-0.361149	0.717988	0.856367	NOT	0	0	14	3	11	19	2	2
AGO1	171.315	0.543827	0.243597	2.23249	0.0255828	0.0995267	NOT	101	87	91	58	334	400	327	333
AGO2	20.9004	-0.957583	0.623502	-1.53581	0.124584	0.300665	NOT	23	7	5	31	29	35	20	16
AGO3	31.0181	1.30704	0.577209	2.26441	0.0235486	0.0933498	UP	4	2	17	22	89	92	76	51
AGO4	75.0769	-0.445769	0.333481	-1.33671	0.181316	0.38577	NOT	38	67	64	40	89	122	131	91
AGPAT1	48.7818	-1.56437	0.430688	-3.63225	0.000280964	0.00286557	DOWN	45	54	28	45	51	31	27	57
AGPAT2	3062.23	1.1607	0.311139	3.7305	0.000191103	0.00208368	NOT	477	1411	1623	1104	8859	7459	6044	6746
AGPAT3	217.686	1.30417	0.20675	6.30795	2.82753e-10	2.26672e-08	UP	66	60	98	84	626	614	427	480
AGPAT4	123.92	0.827324	0.285367	2.89916	0.00374162	0.0229266	NOT	38	60	74	46	333	242	273	233
AGPAT5	76.137	-0.549302	0.338063	-1.62485	0.104195	0.267612	NOT	49	54	70	48	167	137	75	59
AGPS	378.601	-0.450608	0.230954	-1.95108	0.051048	0.163862	NOT	315	237	246	257	639	655	576	350
AGR2	407.647	1.9352	0.48356	4.00199	6.28112e-05	0.000820789	UP	108	35	165	118	2597	698	776	455
AGRN	852.926	0.741113	0.254658	2.91023	0.00361165	0.0224055	NOT	227	363	639	356	2069	2246	1388	1710
AGT	39.6251	-0.883837	0.800121	-1.10463	0.269321	0.490689	NOT	3	70	29	17	117	33	9	37
AGTPBP1	20.4779	-0.286209	0.473975	-0.603848	0.545945	0.742124	NOT	16	12	10	16	33	37	37	20
AGTR1	6.54823	-0.864698	1.17279	-0.737297	0.460942	0.674073	NOT	0	4	14	4	16	12	6	0
AGTRAP	55.443	0.910769	0.370793	2.45628	0.0140386	0.0633863	NOT	12	18	40	26	141	164	120	82
AGXT2	10.4846	-1.14326	2.14515	-0.53295	0.594068	0.777551	NOT	0	13	0	20	37	2	0	7
AHCTF1	158.307	0.111055	0.272313	0.407822	0.683404	0.834557	NOT	59	75	160	86	302	324	249	260
AHCY	376.285	-0.420103	0.258061	-1.62792	0.103542	0.26659	NOT	303	154	258	337	718	670	403	457
AHCYL1	551.821	0.366392	0.305637	1.19878	0.230612	0.446314	NOT	439	290	264	164	1327	1195	1066	718
AHCYL2	92.6587	0.854732	0.48677	1.75593	0.0791011	0.222276	NOT	47	50	34	26	298	117	313	76
AHDC1	37.2946	0.124082	0.613536	0.202241	0.839728	0.924439	NOT	11	41	16	15	49	74	21	119
AHI1	26.6418	-1.31003	0.556677	-2.3533	0.0186074	0.0781896	DOWN	19	21	49	7	23	46	15	25
AHNAK	704.447	0.202711	0.20391	0.994122	0.320164	0.544489	NOT	317	447	448	371	1353	1620	956	1296
AHNAK2	35.5846	0.588533	0.420705	1.39892	0.161837	0.358063	NOT	12	11	22	25	59	84	56	93
AHR	44.8505	0.43214	0.400226	1.07974	0.280258	0.502273	NOT	31	13	35	16	114	118	51	80
AHRR	142.87	-0.799715	0.528438	-1.51336	0.130189	0.309891	NOT	84	220	75	39	122	115	277	170
AHSA1	387.911	0.114339	0.201139	0.568461	0.569722	0.760022	NOT	256	191	240	218	829	650	669	608
AHSA2	13.7764	-1.22518	0.723567	-1.69325	0.0904072	0.243351	NOT	11	19	8	7	19	3	18	14
AICDA	15.1048	0.581393	0.595408	0.97646	0.328837	0.552657	NOT	8	9	7	5	17	39	44	23
AIDA	371.835	-0.374645	0.204317	-1.83365	0.0667065	0.196176	NOT	240	190	343	262	727	565	473	470
AIF1	194.636	-1.18436	0.360701	-3.28349	0.00102529	0.00807288	NOT	179	189	155	124	237	145	304	114
AIF1L	4.02908	-0.628765	1.50894	-0.416694	0.676902	0.830372	NOT	5	6	0	0	5	16	0	3
AIFM1	177.751	-0.306602	0.237338	-1.29184	0.196414	0.404235	NOT	144	95	159	85	310	293	252	239
AIFM2	155.143	0.328455	0.2897	1.13378	0.256888	0.476911	NOT	88	58	63	123	273	346	286	280
AIFM3	22.1082	-0.91298	0.690438	-1.32232	0.186062	0.392199	NOT	7	34	19	8	18	46	37	7
AIG1	262.496	1.52709	0.316763	4.82091	1.42902e-06	3.47093e-05	UP	73	34	134	99	918	680	590	510
AIMP1	375.624	0.112018	0.188236	0.595095	0.55178	0.746571	NOT	211	163	296	220	626	868	664	546
AIMP2	5.39182	-0.0191152	0.926671	-0.0206278	0.983543	0.992635	NOT	3	0	7	4	14	11	6	7
AIP	139.92	0.0219716	0.2979	0.0737548	0.941205	0.972703	NOT	49	84	113	94	244	330	150	259
AIPL1	3.66319	-0.724427	1.3947	-0.519415	0.603471	0.783959	NOT	2	8	0	0	2	12	4	2
AJUBA	19.5884	-1.31863	0.543961	-2.42412	0.0153454	0.0677195	DOWN	11	23	25	9	14	25	13	25
AK1	124.116	0.961601	0.413519	2.32541	0.0200501	0.0826138	NOT	67	71	20	38	242	322	220	335
AK2	891.871	0.195818	0.149739	1.30773	0.190965	0.396964	NOT	483	392	617	546	1676	2011	1524	1380
AK3	317.838	-1.51796	0.270964	-5.60207	2.11805e-08	8.8809e-07	DOWN	407	199	330	217	303	266	322	229
AK4	30.6949	-0.926894	0.572867	-1.61799	0.105664	0.270045	NOT	46	17	7	25	28	38	27	50
AK5	5.21974	-1.9402	1.02877	-1.88594	0.059303	0.181888	NOT	2	12	4	1	3	6	4	2
AK6	68.2175	0.0936541	0.423238	0.22128	0.824874	0.917304	NOT	48	37	57	20	72	126	184	92
AKAIN1	133.316	0.467492	0.293363	1.59356	0.111034	0.27914	NOT	46	42	112	80	297	333	254	194
AKAP1	14.9295	-0.0393861	0.586873	-0.0671117	0.946493	0.974781	NOT	12	4	15	7	31	43	13	19
AKAP10	28.2953	-1.18683	0.429623	-2.76249	0.00573626	0.0320171	NOT	24	26	26	19	29	40	36	15
AKAP11	78.0896	-0.797581	0.325927	-2.44712	0.0144004	0.0646181	NOT	83	55	49	51	98	134	62	103
AKAP12	271.668	-0.868817	0.354167	-2.45313	0.0141621	0.0638076	NOT	250	210	246	146	328	439	123	446
AKAP13	231.858	0.0908187	0.270036	0.336321	0.736629	0.866848	NOT	164	155	109	107	435	441	447	316
AKAP14	60.3709	0.269922	0.412755	0.653952	0.513143	0.718289	NOT	39	31	52	13	77	124	110	136
AKAP17A	291.556	0.227986	0.300835	0.757844	0.448544	0.663417	NOT	82	158	250	173	411	623	524	586
AKAP17B	5.60991	-1.98416	1.14274	-1.73633	0.0825064	0.228927	NOT	4	13	1	2	4	7	0	5
AKAP2	156.412	-1.23517	0.288124	-4.28694	1.81154e-05	0.000294105	DOWN	132	141	109	143	184	192	91	179
AKAP3	17.7198	0.878682	0.551265	1.59394	0.11095	0.27914	NOT	4	9	7	10	26	51	48	32
AKAP5	11.2328	1.92592	0.990324	1.94474	0.0518064	0.165472	NOT	0	4	1	6	12	34	65	8
AKAP6	17.7356	0.348351	0.591659	0.588769	0.556016	0.74995	NOT	4	12	6	15	34	39	19	44
AKAP7	93.1184	-0.393798	0.338556	-1.16317	0.24476	0.46297	NOT	35	59	109	60	151	163	88	155
AKAP8L	397.815	-0.0881001	0.265163	-0.332249	0.739701	0.868239	NOT	161	244	348	253	514	666	762	663
AKAP9	182.974	0.804179	0.297411	2.70393	0.00685247	0.0367492	NOT	56	81	128	64	304	626	399	301
AKIP1	100.559	-0.0688663	0.302904	-0.227353	0.820149	0.914877	NOT	69	37	106	46	202	199	148	134
AKIRIN1	70.5175	-2.67479	0.448337	-5.96604	2.43088e-09	1.39638e-07	DOWN	69	82	87	57	38	21	13	56
AKIRIN2	142.542	-0.870735	0.233923	-3.72232	0.000197402	0.00214098	NOT	122	81	150	101	174	174	176	164
AKNA	90.9936	0.570635	0.374432	1.524	0.127508	0.305576	NOT	60	33	59	28	212	147	256	120
AKNAD1	4.54932	-0.848356	1.44804	-0.585863	0.557967	0.751468	NOT	3	0	0	11	6	1	1	13
AKR1A1	1413.89	0.543668	0.149603	3.63407	0.000278986	0.00284727	NOT	671	629	831	675	3237	3577	2676	2170
AKR1B1	69.9138	-0.814014	0.300226	-2.71134	0.00670125	0.0361695	NOT	68	52	60	36	92	91	86	78
AKR1C1	21.0631	3.97258	1.73929	2.28403	0.02237	0.0896888	UP	0	0	7	0	180	12	71	10
AKR1CL1	136.069	0.941546	0.450817	2.08853	0.0367498	0.129994	NOT	43	65	90	31	489	145	396	175
AKR1E2	569.731	0.229458	0.20799	1.10321	0.269934	0.491	NOT	362	282	289	332	1003	1167	1173	865
AKR7A2	516.606	-1.49554	0.26196	-5.70903	1.13619e-08	5.27901e-07	DOWN	461	505	490	382	472	337	512	489
AKT1	566.91	-0.489562	0.226361	-2.16275	0.0305605	0.113525	NOT	405	328	395	478	823	1032	515	900
AKT1S1	253.905	0.241898	0.252511	0.957969	0.338079	0.56204	NOT	167	73	170	164	460	585	391	466
AKT2	258.52	0.487553	0.283585	1.71925	0.0855689	0.235002	NOT	120	66	185	165	619	676	332	486
AKT3	96.7113	-0.825744	0.313308	-2.63556	0.00839975	0.0430049	NOT	100	72	72	54	128	144	74	136
AKTIP	26.9527	0.361685	0.509741	0.709546	0.477986	0.688585	NOT	18	21	6	10	61	45	49	50
ALAD	192.155	0.23872	0.252141	0.946773	0.343754	0.567502	NOT	124	76	147	88	369	411	406	248
ALAS1	161.79	-0.759583	0.24613	-3.08611	0.00202795	0.0140698	NOT	103	124	118	145	191	208	200	217
ALAS2	4.70483	-0.363998	1.32621	-0.274464	0.783728	0.892722	NOT	7	5	0	0	5	1	8	12
ALCAM	90.2152	1.03627	0.397042	2.60996	0.00905518	0.045471	NOT	20	35	21	65	247	247	162	185
ALDH16A1	188.2	0.320518	0.19626	1.63313	0.102441	0.264871	NOT	97	80	124	109	359	462	338	292
ALDH18A1	622.889	0.514962	0.240718	2.13928	0.0324133	0.118501	NOT	268	268	371	346	1129	1989	1294	752
ALDH1A1	2231.82	0.510002	0.321163	1.58799	0.11229	0.281078	NOT	1324	1108	1219	805	8109	3934	3905	2323
ALDH1A2	26.5864	-0.0442312	0.730801	-0.0605243	0.951738	0.977515	NOT	19	0	29	21	49	20	61	43
ALDH1A3	551.952	-1.96244	0.294724	-6.65856	2.76532e-11	3.10036e-09	DOWN	604	407	506	613	495	240	457	322
ALDH1B1	274.839	-1.00725	0.199326	-5.05327	4.34309e-07	1.23978e-05	NOT	259	160	259	221	352	408	246	268
ALDH1L1	17.2361	-1.53378	0.646316	-2.37311	0.017639	0.0750784	DOWN	5	27	19	10	21	11	19	9
ALDH1L2	40.3498	-0.487939	0.429885	-1.13505	0.256356	0.476389	NOT	41	34	23	14	64	53	49	62
ALDH2	263.711	-1.29463	0.217446	-5.95377	2.62031e-09	1.4531e-07	DOWN	280	183	220	225	284	339	250	190
ALDH3A2	632.323	-0.0264939	0.204331	-0.129662	0.896834	0.953468	NOT	359	436	421	323	1106	1365	1088	787
ALDH3B1	55.2479	0.390359	0.349492	1.11693	0.264023	0.48469	NOT	34	22	26	34	115	179	74	78
ALDH4A1	19.588	0.672826	0.748648	0.898722	0.368801	0.590509	NOT	20	3	2	11	35	39	16	72
ALDH5A1	178.564	0.730049	0.493297	1.47994	0.13889	0.323484	NOT	73	97	93	61	221	609	640	83
ALDH6A1	149.94	-0.825279	0.299668	-2.75397	0.00588765	0.0327087	NOT	162	95	151	62	215	215	156	163
ALDH7A1	206.102	0.126955	0.242412	0.523717	0.600476	0.782034	NOT	160	91	123	105	379	403	295	398
ALDH9A1	1122.59	-0.493549	0.264128	-1.8686	0.0616783	0.186456	NOT	1191	509	828	676	2130	1598	1456	1247
ALDOA	4030.22	0.234956	0.199292	1.17895	0.238417	0.455469	NOT	2460	1841	2235	2444	8102	8454	5165	8290
ALDOB	3852.26	-0.487885	0.311832	-1.56458	0.117682	0.290152	NOT	3107	2769	1852	2970	3860	10724	4455	3916
ALDOC	52.3065	0.756789	0.4258	1.77733	0.0755133	0.214571	NOT	19	19	27	30	119	139	44	153
ALG1	26.1443	-0.0732182	0.502288	-0.145769	0.884104	0.946961	NOT	7	23	22	13	52	73	31	26
ALG10	21.4641	0.380749	0.537026	0.708996	0.478327	0.688755	NOT	8	7	7	23	44	55	41	29
ALG11	22.4201	-0.0341963	0.536896	-0.0636926	0.949215	0.976102	NOT	23	12	7	12	51	56	31	19
ALG12	278.719	0.732907	0.280314	2.6146	0.00893331	0.044974	NOT	68	135	166	142	597	676	681	437
ALG13	55.5992	0.676092	0.514387	1.31436	0.188724	0.394639	NOT	5	32	54	16	100	161	123	91
ALG14	76.8316	-0.127031	0.278378	-0.456327	0.648155	0.812926	NOT	38	46	54	57	114	180	118	100
ALG2	40.2078	0.416701	0.42978	0.96957	0.332261	0.556538	NOT	19	26	30	9	100	113	65	47
ALG3	60.3548	0.424278	0.348188	1.21853	0.223021	0.437669	NOT	48	26	32	19	144	128	96	109
ALG5	40.0218	0.113779	0.385581	0.295083	0.76793	0.883608	NOT	18	28	35	13	79	77	72	58
ALG6	30.6734	0.712801	0.568802	1.25316	0.210147	0.423193	NOT	6	18	8	23	82	102	64	23
ALG8	43.5133	0.628941	0.433067	1.4523	0.146419	0.335187	NOT	20	6	41	20	91	104	93	77
ALG9	62.7271	0.355922	0.392264	0.907352	0.364221	0.586513	NOT	27	33	61	16	146	139	130	74
ALK	4.17492	-0.422997	1.32454	-0.319354	0.749458	0.873416	NOT	4	4	0	3	2	16	0	8
ALKAL2	8.94006	-0.356891	1.02412	-0.348485	0.727476	0.861566	NOT	0	9	13	3	19	16	19	1
ALKBH1	52.6403	0.151823	0.413293	0.367348	0.713359	0.853472	NOT	33	10	45	37	85	150	96	60
ALKBH2	6.50184	-1.80528	1.05089	-1.71786	0.0858224	0.235361	NOT	11	3	1	9	6	10	5	0
ALKBH3	45.1502	0.175107	0.40681	0.430439	0.666876	0.824948	NOT	40	21	13	27	77	107	72	75
ALKBH4	152.209	0.534062	0.252017	2.11915	0.0340776	0.12273	NOT	60	86	102	55	302	356	279	300
ALKBH5	308.252	0.506209	0.225388	2.24595	0.0247075	0.0968926	NOT	140	116	243	134	700	792	446	584
ALKBH6	116.23	0.384477	0.296299	1.2976	0.194426	0.40173	NOT	35	45	98	73	245	250	219	193
ALKBH7	74.7238	0.878011	0.374971	2.34155	0.0192041	0.0798723	NOT	42	37	14	31	176	193	161	136
ALKBH8	34.8839	0.460724	0.667722	0.689995	0.490198	0.699082	NOT	31	0	32	12	60	95	53	73
ALMS1	39.7811	0.688961	0.48521	1.41992	0.15563	0.349175	NOT	15	4	24	33	68	101	87	81
ALOX12	29.2632	0.0399235	0.658177	0.0606576	0.951632	0.977495	NOT	15	33	13	6	17	38	82	56
ALOX15	10.3207	1.02824	1.12793	0.911617	0.361971	0.58435	NOT	0	3	0	13	59	10	16	11
ALOX5	14.4878	-1.33396	0.685798	-1.94512	0.05176	0.165358	NOT	19	3	18	12	7	21	22	7
ALOX5AP	16.8232	-0.573804	0.670947	-0.855215	0.392432	0.612997	NOT	6	3	34	10	16	28	25	24
ALPK1	70.2203	-0.82357	0.376083	-2.18987	0.028534	0.107835	NOT	60	33	52	74	82	151	85	43
ALPK2	3.77734	-0.00810634	1.48067	-0.00547477	0.995632	0.998212	NOT	9	0	0	0	3	10	7	6
ALPL	8.78397	1.51275	1.10554	1.36834	0.171206	0.371837	NOT	0	0	8	4	9	15	9	52
ALS2	37.9783	-0.456879	0.407933	-1.11999	0.26272	0.483272	NOT	42	15	32	19	45	63	60	51
ALS2CL	451.595	-0.0994037	0.341976	-0.290674	0.771301	0.885411	NOT	138	337	444	228	544	978	949	528
ALYREF	289.18	-0.335289	0.195924	-1.71132	0.0870219	0.237419	NOT	185	170	230	202	466	476	336	477
AMACR	35.6571	-2.42662	0.414315	-5.85694	4.71473e-09	2.40747e-07	DOWN	27	25	59	39	21	15	21	19
AMBN	14.9806	-1.94686	0.867025	-2.24545	0.0247391	0.0969119	DOWN	2	24	12	18	26	10	7	1
AMBRA1	137.491	0.615823	0.284754	2.16265	0.0305682	0.113526	NOT	37	54	108	71	298	341	276	236
AMCF-II	36.1322	-1.42578	0.467728	-3.04831	0.00230134	0.0155963	DOWN	23	36	42	27	24	24	56	26
AMD1	211.296	-1.47632	0.235628	-6.26547	3.71698e-10	2.86115e-08	DOWN	224	191	176	156	177	210	183	193
AMDHD1	5.15066	2.3626	1.32958	1.77695	0.075577	0.214687	NOT	4	0	0	0	8	9	10	29
AMDHD2	692.68	0.273792	0.23492	1.16547	0.243829	0.461979	NOT	402	315	387	418	1463	1107	1566	1002
AMER1	56.6526	-0.760609	0.362823	-2.09636	0.0360499	0.128251	NOT	65	35	46	27	72	70	84	60
AMER3	3.89698	0.232064	1.303	0.1781	0.858645	0.934349	NOT	3	5	0	0	7	2	6	12
AMFR	91.5679	0.911949	0.314073	2.90362	0.00368872	0.0227197	NOT	35	34	67	22	245	241	181	164
AMH	6.06466	1.17958	0.915594	1.28832	0.197634	0.406081	NOT	4	2	2	1	8	33	10	10
AMHR2	3.97505	1.39189	1.22218	1.13886	0.254763	0.474788	NOT	2	3	0	0	9	11	15	4
AMIGO1	10.5064	0.199152	0.764816	0.260392	0.794561	0.899234	NOT	2	7	9	6	6	37	11	25
AMIGO2	39.3761	0.354493	0.583793	0.607225	0.543702	0.740506	NOT	21	17	8	36	64	109	21	113
AMMECR1	114.968	0.446377	0.383554	1.16379	0.244508	0.462586	NOT	79	18	101	48	226	287	237	170
AMMECR1L	95.3955	-0.266189	0.326598	-0.815036	0.415052	0.633302	NOT	63	29	72	93	160	186	148	108
AMN	287.351	1.12235	0.38347	2.92682	0.00342443	0.0214766	NOT	42	177	143	72	731	942	573	513
AMN1	93.3063	-0.00732079	0.266441	-0.0274762	0.97808	0.990305	NOT	53	35	75	68	152	188	142	159
AMOT	105.407	0.0415386	0.318749	0.130318	0.896315	0.953244	NOT	99	37	67	51	173	204	155	200
AMOTL1	45.7455	0.0125207	0.557381	0.0224634	0.982078	0.992211	NOT	42	23	6	36	63	84	45	119
AMOTL2	80.8012	-0.524458	0.346064	-1.5155	0.129646	0.308925	NOT	71	61	54	43	133	147	56	126
AMPD2	324.622	0.529721	0.222753	2.37806	0.0174039	0.074303	NOT	134	111	202	207	789	830	541	518
AMPD3	83.3136	-0.183857	0.331041	-0.55539	0.578628	0.766733	NOT	73	30	50	63	164	145	141	89
AMT	90.9333	0.0940711	0.337601	0.278645	0.780517	0.890901	NOT	60	36	63	57	208	246	140	75
AMZ2	340.232	0.417472	0.238559	1.74997	0.0801226	0.224275	NOT	142	213	216	134	717	799	680	495
ANAPC1	202.319	-0.558893	0.384293	-1.45434	0.145852	0.334264	NOT	46	178	219	147	232	350	324	219
ANAPC10	24.213	-1.89145	0.566353	-3.3397	0.000838693	0.00689127	DOWN	40	27	15	8	16	19	19	16
ANAPC11	533.803	1.17608	0.192483	6.11008	9.95842e-10	6.58448e-08	NOT	228	143	218	211	1424	1702	1082	969
ANAPC13	94.8405	-0.801782	0.291607	-2.74953	0.00596813	0.033037	NOT	76	46	112	66	103	139	137	96
ANAPC15	251.292	0.569569	0.258083	2.20692	0.0273193	0.104392	NOT	79	88	202	136	527	643	488	424
ANAPC16	304.798	-0.523962	0.230506	-2.27309	0.0230205	0.0916557	NOT	225	145	271	244	593	454	330	358
ANAPC2	204.749	0.49956	0.292799	1.70615	0.0879797	0.238937	NOT	78	77	124	137	360	416	305	545
ANAPC4	262.945	0.0622159	0.288119	0.215939	0.829036	0.919969	NOT	116	147	187	177	330	470	630	382
ANAPC5	68.1244	0.134908	0.307928	0.438116	0.661302	0.821605	NOT	30	43	43	41	92	155	127	115
ANAPC7	187.83	0.265684	0.266302	0.997676	0.318436	0.542843	NOT	104	66	95	150	343	402	309	354
ANG	45.4254	1.30551	0.41572	3.14036	0.0016874	0.0121373	UP	11	14	12	26	125	110	131	76
ANGEL1	1.7766	1.86315	1.775	1.04966	0.293873	0.517108	NOT	0	0	2	0	3	12	2	4
ANGEL2	116.097	0.435494	0.379335	1.14805	0.25095	0.469775	NOT	26	55	78	83	168	328	284	146
ANGPT1	5.72454	-0.939732	0.9518	-0.987321	0.323485	0.547829	NOT	8	4	3	3	2	15	9	2
ANGPT2	13.3047	-0.18255	0.816302	-0.223631	0.823045	0.916596	NOT	6	8	0	19	28	27	12	20
ANGPT4	15.735	-1.22074	0.69757	-1.74999	0.0801199	0.224275	NOT	7	27	10	7	27	14	6	18
ANGPTL1	15.5153	0.900201	0.764451	1.17758	0.238965	0.456115	NOT	7	14	4	0	41	47	19	34
ANGPTL2	95.6248	1.32368	0.515575	2.56738	0.0102469	0.0498555	UP	71	13	28	21	178	349	95	329
ANGPTL4	270.479	0.284888	0.372928	0.763923	0.444913	0.660438	NOT	97	173	98	210	363	694	307	682
ANGPTL6	14.4387	-0.42491	0.866897	-0.49015	0.624028	0.797996	NOT	20	0	3	17	35	17	19	14
ANGPTL7	12.5605	0.476872	0.707396	0.674124	0.500232	0.707731	NOT	7	4	2	12	22	22	15	39
ANK1	5.25598	-1.65663	1.32375	-1.25146	0.210765	0.423809	NOT	0	11	8	0	7	2	1	7
ANK2	91.0055	-0.622416	0.3779	-1.64704	0.0995499	0.25978	NOT	79	34	117	48	115	179	67	141
ANK3	257.17	1.06017	0.239892	4.41934	9.90007e-06	0.000176468	NOT	113	104	108	78	533	678	687	480
ANKDD1A	7.64009	-1.1112	1.36778	-0.812407	0.416558	0.63496	NOT	0	1	0	24	9	12	12	1
ANKFY1	32.8174	-1.06801	0.617651	-1.72914	0.0837835	0.231606	NOT	47	8	18	35	64	26	44	12
ANKH	509.117	3.1598	0.453461	6.96818	3.21064e-12	5.01768e-10	UP	56	64	41	83	2507	517	2093	988
ANKHD1	131.123	-0.265211	0.307937	-0.861251	0.3891	0.609512	NOT	119	66	109	57	175	277	235	139
ANKIB1	111.503	-0.247425	0.261527	-0.946077	0.344109	0.567778	NOT	97	62	72	62	162	206	152	180
ANKLE1	30.8522	0.326599	0.465139	0.702154	0.482583	0.692243	NOT	16	26	16	7	68	65	60	43
ANKLE2	77.958	0.571715	0.291376	1.96212	0.0497486	0.16096	NOT	31	29	55	40	148	246	128	134
ANKMY1	3.7636	-0.332092	1.49386	-0.222304	0.824077	0.917003	NOT	0	9	0	0	4	9	5	5
ANKMY2	90.647	-1.40838	0.333703	-4.22046	2.43806e-05	0.000382185	DOWN	81	93	48	89	95	86	89	69
ANKRA2	18.0637	-0.669576	0.749127	-0.893809	0.371424	0.593457	NOT	13	0	25	19	29	31	28	10
ANKRD10	533.612	0.539146	0.2698	1.99832	0.0456824	0.151738	NOT	150	247	410	269	902	1593	1064	852
ANKRD11	430.37	0.300338	0.211401	1.42071	0.155402	0.348815	NOT	244	149	337	227	786	1004	829	663
ANKRD12	174.954	0.0970576	0.221672	0.437844	0.6615	0.821717	NOT	98	90	146	82	350	336	255	304
ANKRD13A	578.26	0.669576	0.267861	2.49971	0.0124294	0.0578023	NOT	321	237	273	250	1069	1322	1672	778
ANKRD13B	50.6624	0.204383	0.442905	0.461461	0.644468	0.811327	NOT	19	11	43	45	93	120	53	111
ANKRD13C	76.2756	-0.0160079	0.320991	-0.0498705	0.960226	0.981541	NOT	32	59	40	52	161	153	114	98
ANKRD13D	103.305	-0.52886	0.299734	-1.76443	0.0776597	0.219234	NOT	60	89	102	46	128	179	139	136
ANKRD16	30.3034	0.727303	0.688474	1.0564	0.290786	0.513825	NOT	6	31	13	3	25	83	54	93
ANKRD17	201.376	0.211463	0.276825	0.763887	0.444935	0.660438	NOT	153	57	141	110	345	410	380	344
ANKRD22	11.4196	-0.0380133	0.918888	-0.0413688	0.967002	0.985343	NOT	18	4	6	0	35	11	23	8
ANKRD24	134.203	-0.830683	0.432738	-1.9196	0.0549088	0.172567	NOT	72	179	98	55	115	148	238	144
ANKRD27	157.291	0.344663	0.312311	1.10359	0.269772	0.490879	NOT	75	60	87	116	228	399	388	198
ANKRD28	112.021	0.430426	0.28467	1.51202	0.13053	0.310414	NOT	62	50	83	40	239	296	225	139
ANKRD29	25.5056	-0.0893485	0.47003	-0.190091	0.849238	0.928633	NOT	21	12	16	15	43	69	19	44
ANKRD33B	7.5169	0.642788	1.08769	0.590967	0.554542	0.748485	NOT	1	1	0	12	30	10	8	15
ANKRD34A	3.39754	0.758878	1.56703	0.484278	0.628188	0.800802	NOT	6	0	0	0	1	11	5	12
ANKRD35	61.0129	-0.45348	0.35286	-1.28516	0.198738	0.407375	NOT	36	46	45	43	72	68	106	97
ANKRD37	17.0769	0.997568	0.690023	1.4457	0.14826	0.337734	NOT	3	11	13	1	56	56	31	19
ANKRD39	67.9917	-0.918162	0.400532	-2.29236	0.021885	0.0881782	NOT	47	64	76	30	120	123	49	45
ANKRD40	175.694	-0.160637	0.226034	-0.710678	0.477284	0.688086	NOT	116	90	116	129	256	395	284	219
ANKRD42	48.1284	0.203168	0.326123	0.622978	0.533299	0.733195	NOT	23	25	38	24	97	130	70	66
ANKRD44	21.177	-0.27763	0.554559	-0.500633	0.61663	0.793617	NOT	21	5	20	12	49	52	19	18
ANKRD46	117.554	-0.0948731	0.302525	-0.313604	0.753822	0.876129	NOT	53	85	81	74	190	232	121	239
ANKRD49	106.505	0.146567	0.265129	0.552816	0.580389	0.767634	NOT	65	39	63	80	188	259	165	167
ANKRD50	46.4861	-0.0546716	0.400141	-0.136631	0.891322	0.950285	NOT	30	20	54	15	75	90	60	89
ANKRD52	26.076	-1.4328	0.485572	-2.95075	0.00317007	0.0202007	DOWN	30	14	18	30	32	15	25	23
ANKRD54	56.3015	0.173932	0.410989	0.423204	0.672146	0.827953	NOT	27	36	16	46	75	144	86	107
ANKRD6	50.8778	0.0984966	0.507061	0.19425	0.84598	0.927622	NOT	20	40	53	8	91	134	100	45
ANKRD63	6.90703	-0.60795	1.22377	-0.496785	0.619341	0.795189	NOT	12	7	0	0	4	8	20	4
ANKRD65	8.96921	0.194745	1.07827	0.180609	0.856674	0.933035	NOT	1	1	0	18	26	18	11	12
ANKRD9	130.552	0.0350375	0.323241	0.108394	0.913683	0.960822	NOT	60	76	112	69	375	255	134	166
ANKS1A	202.833	0.215554	0.248956	0.865832	0.386582	0.606736	NOT	101	121	159	78	320	447	363	365
ANKS1B	5.23537	1.19514	1.07319	1.11363	0.265437	0.486073	NOT	0	3	5	0	11	22	8	11
ANKS3	35.0176	-0.100718	0.460635	-0.21865	0.826923	0.91879	NOT	27	33	14	11	54	79	53	48
ANKS4B	510.021	-0.260784	0.235489	-1.10742	0.268114	0.489124	NOT	372	335	415	231	709	813	902	727
ANKS6	7.98775	-0.451582	0.89301	-0.505685	0.613078	0.790648	NOT	5	10	7	0	7	23	11	7
ANKZF1	12.0757	-1.33993	0.646294	-2.07325	0.038149	0.133117	DOWN	14	11	6	10	10	15	17	5
ANLN	60.8528	-0.888211	0.533793	-1.66396	0.0961204	0.253352	NOT	69	20	86	25	133	96	22	55
ANO1	73.7819	0.453345	0.472318	0.95983	0.337141	0.561551	NOT	58	23	38	33	112	269	45	181
ANO10	170.953	1.19065	0.31416	3.78995	0.000150677	0.0017029	NOT	53	89	73	35	424	456	313	439
ANO6	128.736	-0.967212	0.313937	-3.08091	0.00206369	0.014267	NOT	70	114	108	119	137	244	86	148
ANO7	16.1383	1.46976	0.747609	1.96595	0.0493046	0.160108	UP	1	0	11	10	48	43	34	39
ANO8	37.5876	-0.439408	0.681342	-0.644916	0.518982	0.722151	NOT	19	2	74	20	49	93	23	62
ANO9	182.83	0.75913	0.347187	2.18652	0.0287778	0.108492	NOT	59	74	75	120	352	501	534	200
ANOS1	3.40088	-1.03403	1.4263	-0.724978	0.468466	0.680528	NOT	2	8	0	0	7	6	2	1
ANP32A	415.282	-0.189553	0.237853	-0.796935	0.425489	0.642761	NOT	316	146	348	285	760	695	648	563
ANP32B	794.925	-0.949849	0.220726	-4.30328	1.68284e-05	0.000275232	NOT	819	549	522	628	1046	1187	717	826
ANP32E	222.41	-0.51461	0.218914	-2.35074	0.0187359	0.0785197	NOT	200	123	163	150	372	338	260	292
ANPEP	8164.33	0.176018	0.356446	0.493815	0.621437	0.796637	NOT	2626	5849	3183	6469	13981	22507	16853	7538
ANTXR1	87.9615	-0.138828	0.329411	-0.421445	0.67343	0.828771	NOT	61	60	69	34	164	191	79	151
ANTXR2	257.906	0.767079	0.268537	2.85651	0.00428321	0.0254016	NOT	102	122	121	116	467	729	355	690
ANXA1	389.301	-1.92883	0.311145	-6.19913	5.67761e-10	4.10486e-08	DOWN	444	274	300	470	326	342	132	326
ANXA11	604.884	-0.572784	0.169203	-3.38519	0.000711294	0.00604678	NOT	497	342	510	419	870	999	672	819
ANXA13	1159.9	-0.894889	0.163037	-5.48885	4.0455e-08	1.55315e-06	NOT	793	816	1179	907	1552	1598	1384	1070
ANXA2	3110.09	-0.637701	0.212413	-3.00217	0.00268058	0.0177315	NOT	2854	1680	2285	2386	5059	4130	4289	3220
ANXA3	6.28082	0.654689	1.12994	0.579399	0.56232	0.755042	NOT	0	7	0	4	15	28	8	5
ANXA4	746.094	-2.46133	0.337153	-7.30032	2.87085e-13	6.34541e-11	DOWN	978	471	842	803	539	203	476	317
ANXA5	467.023	-1.8093	0.240875	-7.51139	5.85017e-14	1.74065e-11	DOWN	501	409	397	442	414	308	281	405
ANXA6	250.567	-0.991796	0.320939	-3.0903	0.00199956	0.0139232	NOT	227	211	197	167	341	281	138	387
ANXA7	169.454	-0.836012	0.237293	-3.52311	0.00042651	0.00400152	NOT	154	111	130	131	212	209	173	235
ANXA8	42.7641	-0.75836	0.487586	-1.55534	0.119866	0.293722	NOT	18	38	45	30	37	56	27	94
ANXA9	29.5497	-0.0282111	0.455867	-0.0618846	0.950655	0.976957	NOT	13	14	29	18	33	45	67	51
AOAH	6.38082	2.26988	1.42787	1.5897	0.111902	0.280563	NOT	0	0	6	0	23	9	38	1
AOC1	2821.64	1.22459	0.339991	3.60184	0.000315976	0.00315467	UP	576	1550	685	1151	7153	6628	7637	5510
AOC2	6.98601	-0.821417	0.961321	-0.854466	0.392847	0.613394	NOT	5	0	4	13	15	7	9	4
AOX1	3.94664	-2.21133	1.15486	-1.91481	0.0555169	0.173878	NOT	8	0	3	5	3	4	2	1
AP1AR	20.6291	-3.11908	0.664847	-4.69143	2.713e-06	5.88718e-05	DOWN	25	17	28	21	17	11	1	2
AP1B1	488.881	0.375679	0.22391	1.67781	0.0933836	0.24814	NOT	326	173	279	262	1200	972	887	747
AP1G1	288.711	-0.384071	0.19671	-1.95247	0.0508824	0.163534	NOT	196	154	234	216	487	517	429	305
AP1G2	41.2298	0.181091	0.416712	0.434572	0.663873	0.822769	NOT	35	23	14	20	97	103	49	59
AP1M1	258.784	-0.00139017	0.215277	-0.00645759	0.994848	0.997944	NOT	132	177	184	134	501	590	361	355
AP1M2	173.029	-0.372255	0.296639	-1.25491	0.209511	0.422395	NOT	171	59	145	107	244	329	269	202
AP1S1	254.505	-0.510361	0.270735	-1.8851	0.0594169	0.182087	NOT	186	103	224	225	395	359	258	423
AP1S2	74.1815	-1.39267	0.313398	-4.44376	8.83982e-06	0.000160152	DOWN	46	80	67	65	93	80	55	56
AP1S3	75.3874	-0.64086	0.372627	-1.71984	0.0854608	0.234785	NOT	50	50	73	52	165	58	81	96
AP2A1	974.251	0.686022	0.209205	3.27918	0.00104109	0.00816824	NOT	486	268	664	440	2202	2537	1842	1750
AP2A2	669.382	0.745166	0.22302	3.34126	0.000834001	0.00686365	NOT	261	241	438	296	1240	1480	1707	1265
AP2B1	331.333	-1.22432	0.20716	-5.91003	3.42038e-09	1.78182e-07	DOWN	335	239	260	287	400	388	267	318
AP2M1	491.504	-1.62144	0.239385	-6.77335	1.25832e-11	1.63603e-09	DOWN	559	322	395	520	478	392	363	413
AP2S1	387.812	0.44628	0.229406	1.94537	0.0517302	0.165297	NOT	201	173	188	232	1033	919	512	661
AP3B1	122.538	-0.230663	0.285981	-0.806567	0.419916	0.638025	NOT	100	74	61	82	258	194	173	152
AP3D1	343.301	0.197515	0.20623	0.95774	0.338194	0.56204	NOT	157	138	252	241	638	740	576	575
AP3M1	132.078	-0.276937	0.246813	-1.12205	0.261841	0.482312	NOT	116	67	91	78	246	230	179	171
AP3M2	8.8768	0.137617	0.866531	0.158813	0.873816	0.941479	NOT	2	7	10	2	16	38	3	12
AP3S1	262.636	-1.64265	0.244673	-6.71364	1.89823e-11	2.33388e-09	DOWN	263	193	256	256	318	192	177	189
AP3S2	283.377	0.00845172	0.186378	0.0453471	0.963831	0.983667	NOT	166	151	206	167	525	676	426	363
AP4B1	188.996	0.0997089	0.269034	0.370618	0.710922	0.852203	NOT	112	99	120	112	294	322	450	256
AP4E1	27.4921	-0.518139	0.411659	-1.25866	0.208153	0.420528	NOT	22	21	19	16	53	48	31	26
AP4M1	139.946	0.125981	0.304316	0.41398	0.678889	0.831874	NOT	83	40	87	119	224	350	239	204
AP4S1	77.667	-0.877245	0.361045	-2.42974	0.0151098	0.0669469	NOT	52	69	77	46	81	75	74	136
AP5B1	164.252	0.410405	0.333016	1.23239	0.217804	0.432199	NOT	70	92	121	62	303	274	468	217
AP5M1	86.741	0.412992	0.267415	1.54438	0.122495	0.297667	NOT	41	45	53	42	182	223	170	115
AP5S1	10.3154	0.777	0.838831	0.926288	0.354296	0.577383	NOT	2	0	13	5	16	24	32	17
AP5Z1	436.17	-0.474304	0.240169	-1.97488	0.0482821	0.157933	NOT	254	369	293	298	565	692	716	520
APAF1	233.757	0.164228	0.314543	0.522115	0.60159	0.782655	NOT	74	143	181	141	334	739	395	283
APBA1	13.7239	-1.66085	0.909473	-1.82617	0.0678253	0.198523	NOT	18	24	1	4	11	21	2	13
APBA3	74.5602	-0.485057	0.34432	-1.40874	0.158912	0.353847	NOT	26	52	71	64	107	108	125	84
APBB1	58.5656	-0.505547	0.465764	-1.08541	0.277739	0.49973	NOT	42	48	22	50	74	101	33	124
APBB1IP	16.2126	-0.64164	0.54408	-1.17931	0.238273	0.45542	NOT	9	6	16	18	26	21	14	26
APBB2	81.215	-0.265493	0.276822	-0.959073	0.337522	0.561651	NOT	51	48	54	62	154	166	84	112
APBB3	20.4195	0.177534	0.500575	0.35466	0.722844	0.859113	NOT	12	4	18	14	30	52	39	30
APC	96.0008	-1.3571	0.257468	-5.27095	1.35718e-07	4.51576e-06	DOWN	79	82	86	87	91	126	94	64
APC2	9.57241	-2.75708	1.04129	-2.64775	0.00810284	0.0418309	DOWN	1	17	20	3	4	5	8	0
APCDD1	32.6886	0.819034	0.454359	1.80262	0.0714484	0.206125	NOT	18	17	8	13	103	60	65	57
APEH	242.961	0.184301	0.24992	0.737441	0.460854	0.674028	NOT	145	82	139	190	448	554	425	363
APEX1	175.748	-1.13216	0.247801	-4.56883	4.90446e-06	9.75345e-05	NOT	140	91	193	173	208	269	162	135
APEX2	42.1061	0.101295	0.397821	0.254626	0.799012	0.901569	NOT	41	12	22	24	81	87	69	64
APH1A	286.736	0.517249	0.236886	2.18353	0.0289966	0.109131	NOT	146	113	149	166	787	671	524	373
APH1B	11.8254	0.789922	0.756218	1.04457	0.296222	0.5202	NOT	0	6	6	9	31	19	18	33
API5	367.244	-0.0735166	0.239104	-0.307467	0.758488	0.87813	NOT	278	167	321	164	658	663	484	652
APIP	55.8514	-1.22812	0.442406	-2.77601	0.00550307	0.031029	DOWN	78	40	57	16	72	78	43	42
APITD1	27.1668	0.588197	0.59975	0.980737	0.326722	0.550723	NOT	17	24	5	4	63	82	47	37
APLF	147.803	-0.782102	0.368941	-2.11986	0.0340183	0.122631	NOT	79	156	120	92	199	264	222	77
APLN	11.444	-0.646848	0.873563	-0.740471	0.459014	0.672271	NOT	14	0	17	5	29	15	5	14
APLNR	34.0242	1.93122	0.506187	3.81523	0.000136057	0.00156163	UP	7	7	14	7	119	110	35	112
APLP1	48.5053	1.04028	0.586322	1.77425	0.0760221	0.2157	NOT	24	20	9	22	107	152	20	174
APLP2	412.906	0.312736	0.294721	1.06113	0.288632	0.511285	NOT	209	291	164	207	1130	885	662	516
APMAP	115.731	1.42592	0.286062	4.98466	6.20725e-07	1.6587e-05	UP	38	25	52	40	396	365	227	198
APOA1	24352.1	1.60901	0.59929	2.68485	0.0072562	0.038356	UP	1578	10785	4511	11299	29570	101110	64427	59489
APOA4	14166.9	1.45389	0.713571	2.03749	0.0416012	0.141649	UP	705	7025	1873	7969	25000	29223	53262	30558
APOB	3288.79	1.23283	0.672299	1.83376	0.06669	0.196165	NOT	298	2264	758	1216	5003	9512	10982	5899
APOBEC1	46.7225	-0.272168	0.55253	-0.492585	0.622306	0.797178	NOT	32	25	38	30	60	27	150	38
APOBEC2	5.62456	-1.86189	1.5217	-1.22356	0.221117	0.43586	NOT	14	0	0	7	1	4	0	11
APOBEC3B	47.5928	-0.974874	0.424346	-2.29735	0.0215985	0.0873425	NOT	44	30	32	46	42	36	80	54
APOBR	16.3178	0.867435	0.933685	0.929045	0.352866	0.576205	NOT	12	14	0	0	38	43	35	29
APOC3	7461.47	2.16971	0.455981	4.75832	1.95209e-06	4.50115e-05	UP	601	2383	1120	2274	9277	34342	27767	13494
APOD	17.5369	-0.749669	0.637823	-1.17536	0.239853	0.457161	NOT	6	8	34	9	19	42	11	22
APOE	380.81	1.30183	0.316647	4.1113	3.9343e-05	0.000561546	UP	140	133	177	87	1605	833	573	757
APOF	13.0079	0.0354551	0.735101	0.0482316	0.961532	0.982428	NOT	8	0	15	10	30	33	19	12
APOLD1	22.8543	-0.0704007	0.652678	-0.107864	0.914103	0.960933	NOT	15	20	2	17	29	55	18	52
APOM	28.3664	0.999192	0.579603	1.72393	0.0847212	0.233323	NOT	4	13	7	21	53	75	96	34
APOO	50.4867	-0.925771	0.311983	-2.96738	0.00300348	0.0193947	NOT	38	42	37	42	71	62	55	51
APOOL	67.2893	-1.58565	0.472674	-3.35465	0.000794658	0.0065854	DOWN	105	22	55	65	82	42	72	33
APOPT1	328.156	0.831377	0.250107	3.32409	0.00088708	0.0072009	NOT	206	112	136	118	855	917	527	633
APP	365.14	0.231741	0.259934	0.891536	0.372642	0.594689	NOT	225	193	162	225	731	683	470	809
APPBP2	142.191	-0.214338	0.233106	-0.919488	0.35784	0.580655	NOT	88	104	89	86	259	280	181	194
APPL1	16.5304	-1.69309	0.765026	-2.21312	0.0268894	0.103207	DOWN	5	18	36	5	26	17	3	10
APPL2	59.5861	-0.225709	0.344085	-0.655968	0.511845	0.717389	NOT	51	21	46	40	79	104	113	79
APRT	297.295	0.61701	0.2248	2.74471	0.00605652	0.0334188	NOT	113	130	214	122	668	774	444	614
APTX	56.4867	0.151507	0.428529	0.353552	0.723675	0.859328	NOT	22	36	26	44	127	120	125	41
AQP1	358.521	0.852036	0.352277	2.41866	0.015578	0.0685111	NOT	145	165	163	144	675	1518	296	823
AQP10	145.361	0.890593	0.97444	0.913953	0.360742	0.583144	NOT	61	122	31	19	54	952	90	312
AQP11	38.1372	0.440212	0.464291	0.948139	0.343059	0.566813	NOT	25	6	29	21	102	83	82	39
AQP3	9.84793	-1.49709	0.756058	-1.98013	0.0476889	0.156522	DOWN	2	11	10	12	9	4	11	10
AQP7	19.7106	2.07846	0.823935	2.52261	0.0116488	0.0551008	UP	10	1	0	7	41	132	38	24
AQP8	46.8296	2.07298	0.696696	2.97544	0.00292568	0.0190155	UP	27	11	2	2	52	174	145	143
AQR	38.4465	0.07306	0.429159	0.17024	0.864821	0.937076	NOT	15	32	27	16	60	56	85	63
ARAF	238.643	-0.284279	0.265803	-1.06951	0.28484	0.507024	NOT	160	109	166	205	380	555	221	359
ARAP1	311.339	-0.341745	0.220018	-1.55326	0.12036	0.294701	NOT	257	146	202	241	518	517	406	448
ARAP2	41.3207	-0.163061	0.548915	-0.29706	0.766421	0.882624	NOT	59	19	14	12	82	80	75	34
ARAP3	56.0856	0.563627	0.477056	1.18147	0.237417	0.454449	NOT	9	38	40	23	71	109	109	158
ARCN1	767.164	-0.86497	0.211967	-4.08068	4.49043e-05	0.000628173	NOT	725	477	636	571	1061	811	927	892
AREG	40.786	0.257563	0.600035	0.429246	0.667744	0.825516	NOT	12	27	15	34	49	26	135	75
AREL1	431.408	0.769099	0.211539	3.63573	0.000277191	0.00284103	NOT	173	152	304	163	890	1225	901	759
ARF1	1763.35	0.200342	0.165368	1.21149	0.225706	0.440992	NOT	1127	777	1126	976	3873	3428	2874	2813
ARF2	49.2521	0.275091	0.502969	0.546935	0.584423	0.770368	NOT	51	5	34	21	109	107	65	93
ARF3	348.744	0.243918	0.316886	0.769735	0.441457	0.656942	NOT	268	118	141	244	919	593	612	478
ARF4	516.109	-1.32687	0.260035	-5.10265	3.34921e-07	9.9652e-06	DOWN	511	421	374	465	679	392	434	495
ARF5	168.252	0.826788	0.242187	3.41384	0.000640537	0.00556139	NOT	64	82	78	69	375	551	276	310
ARF6	645.524	-0.73873	0.212861	-3.47049	0.000519512	0.00467864	NOT	470	554	488	427	1059	867	762	650
ARFGAP1	823.176	0.750057	0.211687	3.54324	0.000395247	0.003778	NOT	265	296	468	478	1927	1873	1613	1668
ARFGAP2	274.99	-0.00603609	0.197516	-0.03056	0.97562	0.989628	NOT	141	167	210	154	432	650	420	407
ARFGAP3	450.042	-0.241586	0.220199	-1.09713	0.272586	0.493846	NOT	253	302	274	344	771	874	726	490
ARFGEF1	159.768	-0.235505	0.205726	-1.14475	0.252311	0.471583	NOT	105	107	119	88	267	306	225	217
ARFGEF2	132.461	0.597256	0.289648	2.06201	0.0392068	0.136007	NOT	76	34	99	54	241	370	269	228
ARFGEF3	50.2089	0.317916	0.478624	0.664229	0.506544	0.712489	NOT	13	18	52	30	114	188	48	57
ARFIP1	275.575	-0.44588	0.211748	-2.10571	0.0352293	0.126144	NOT	225	171	177	194	496	472	323	330
ARFIP2	358.954	0.447611	0.231482	1.93368	0.053153	0.168444	NOT	130	157	289	177	681	1003	647	563
ARFRP1	113.565	-0.325347	0.267522	-1.21615	0.223926	0.438854	NOT	68	93	83	60	164	223	135	175
ARG2	45.2562	-0.905121	0.528631	-1.7122	0.0868599	0.237186	NOT	80	10	29	25	58	57	45	56
ARGLU1	191.101	-0.0777235	0.238138	-0.32638	0.744137	0.870608	NOT	103	94	171	117	331	493	231	259
ARHGAP1	211.171	-0.886956	0.253692	-3.4962	0.000471942	0.00434119	NOT	201	121	142	199	281	309	181	256
ARHGAP10	110.135	-0.270598	0.276792	-0.977621	0.328262	0.552051	NOT	77	62	60	91	142	211	151	181
ARHGAP11A	146.092	-1.22525	0.281642	-4.35039	1.35894e-05	0.000231304	DOWN	160	79	143	120	144	192	97	173
ARHGAP12	132.87	0.0363672	0.276348	0.131599	0.895301	0.952687	NOT	105	45	109	66	264	295	193	187
ARHGAP15	31.7283	-1.6234	0.477165	-3.40217	0.000668521	0.0057426	DOWN	29	23	35	30	17	15	32	38
ARHGAP17	426.101	-0.656053	0.305773	-2.14555	0.0319087	0.117265	NOT	281	259	308	416	380	538	819	480
ARHGAP18	169.881	-1.31402	0.287092	-4.57699	4.71708e-06	9.4537e-05	DOWN	109	167	203	112	172	160	203	128
ARHGAP19	74.2544	-0.410669	0.434463	-0.945233	0.34454	0.568158	NOT	77	13	58	62	79	140	117	102
ARHGAP20	10.8721	-0.810114	0.700292	-1.15682	0.247345	0.465851	NOT	9	9	13	3	15	13	21	5
ARHGAP21	156.263	-0.305295	0.288876	-1.05684	0.290586	0.513588	NOT	115	61	141	111	301	367	171	156
ARHGAP22	31.9697	-0.215231	0.469508	-0.458419	0.646652	0.812201	NOT	10	28	27	18	57	34	47	60
ARHGAP23	11.5835	-1.68941	0.901591	-1.8738	0.0609573	0.184928	NOT	7	10	6	19	3	8	1	24
ARHGAP24	28.037	-1.04978	0.432748	-2.42585	0.0152726	0.0674944	NOT	18	17	22	35	33	45	31	19
ARHGAP25	73.367	-0.0853112	0.296682	-0.287551	0.77369	0.886903	NOT	50	36	57	42	141	117	141	88
ARHGAP26	192.303	-0.122913	0.230717	-0.532744	0.594211	0.777606	NOT	110	91	123	164	298	389	295	288
ARHGAP27	261.587	0.36626	0.267195	1.37076	0.17045	0.370852	NOT	181	109	148	118	591	426	588	394
ARHGAP28	19.9761	-0.759339	0.575072	-1.32043	0.186693	0.393049	NOT	16	22	10	11	19	35	11	37
ARHGAP29	75.3444	-0.631288	0.401939	-1.57061	0.116274	0.287864	NOT	84	54	25	53	86	103	106	105
ARHGAP30	55.8265	-0.084061	0.47829	-0.175753	0.860488	0.934606	NOT	45	50	31	10	112	72	106	76
ARHGAP31	66.7534	-1.03123	0.291765	-3.53445	0.000408632	0.00387874	NOT	51	52	50	63	91	76	74	60
ARHGAP32	82.4551	0.225628	0.297482	0.75846	0.448176	0.663417	NOT	66	38	37	42	166	177	138	132
ARHGAP33	11.1144	-0.847521	0.790538	-1.07208	0.283684	0.50613	NOT	9	0	18	10	15	23	11	8
ARHGAP35	359.927	0.048013	0.251029	0.191265	0.848318	0.92836	NOT	271	179	164	236	754	684	464	622
ARHGAP39	71.0619	-0.0931887	0.532004	-0.175165	0.86095	0.934753	NOT	44	5	96	45	124	175	75	111
ARHGAP4	151.9	0.487213	0.397931	1.22437	0.220814	0.435658	NOT	62	124	87	28	361	281	305	262
ARHGAP42	77.8144	0.407597	0.373571	1.09108	0.275237	0.496614	NOT	74	24	40	25	158	194	132	132
ARHGAP44	4.00791	0.487117	1.44578	0.336923	0.736175	0.866708	NOT	4	0	0	4	9	16	0	9
ARHGAP45	93.2763	0.369338	0.299652	1.23255	0.217742	0.432199	NOT	56	53	42	44	241	164	169	146
ARHGAP5	266.941	-0.36101	0.237118	-1.52249	0.127886	0.306246	NOT	238	142	152	192	451	446	335	378
ARHGAP6	35.2525	-0.208846	0.554285	-0.376784	0.706334	0.84934	NOT	27	22	15	26	41	45	22	109
ARHGAP8	59.1074	0.319544	0.55205	0.578831	0.562703	0.755042	NOT	33	7	39	52	87	90	205	56
ARHGAP9	84.6249	0.554477	0.417472	1.32818	0.18412	0.389539	NOT	30	58	38	37	140	130	277	122
ARHGDIA	2478.15	0.475624	0.188571	2.52225	0.0116606	0.0551385	NOT	1271	1012	1401	1372	6640	5626	3540	4262
ARHGDIB	350.559	-0.732044	0.260462	-2.81056	0.00494557	0.0284453	NOT	243	277	282	255	649	344	437	366
ARHGDIG	11.8286	0.833615	0.89194	0.934609	0.34999	0.573506	NOT	0	5	15	2	21	46	8	33
ARHGEF1	356.655	0.116719	0.253981	0.459559	0.645833	0.811659	NOT	171	144	343	197	622	644	744	519
ARHGEF10	64.6301	-0.222606	0.432386	-0.514833	0.60667	0.786728	NOT	53	60	32	19	85	104	81	133
ARHGEF10L	138.794	1.17061	0.276119	4.23952	2.24001e-05	0.000355096	NOT	54	38	62	55	270	311	336	378
ARHGEF11	211.045	0.373421	0.243493	1.5336	0.125128	0.301649	NOT	103	125	128	89	389	623	367	295
ARHGEF12	144.561	-0.973938	0.245278	-3.97074	7.16486e-05	0.000919193	NOT	142	85	110	128	200	191	130	154
ARHGEF15	30.2631	0.436787	0.467508	0.934288	0.350155	0.57355	NOT	18	6	15	24	56	53	53	73
ARHGEF16	1746.04	0.108513	0.279174	0.388694	0.697503	0.843129	NOT	756	1059	1188	1075	2437	2944	4489	2323
ARHGEF17	115.024	-0.252868	0.413068	-0.61217	0.540425	0.738449	NOT	103	98	47	46	138	161	144	259
ARHGEF18	473.636	0.318108	0.224228	1.41868	0.155991	0.349813	NOT	206	286	294	234	722	1155	966	774
ARHGEF19	134.313	-0.920267	0.475303	-1.93617	0.0528472	0.167883	NOT	61	154	162	50	67	215	239	112
ARHGEF2	321.13	0.22879	0.202382	1.13048	0.258273	0.47839	NOT	170	186	213	149	645	632	622	478
ARHGEF25	141.984	0.124289	0.422021	0.29451	0.768368	0.883618	NOT	92	63	82	93	154	263	115	462
ARHGEF26	56.8165	-1.44273	0.450777	-3.20054	0.00137171	0.0102034	DOWN	78	60	32	26	40	81	35	57
ARHGEF28	124.342	0.506825	0.385803	1.31369	0.188951	0.395008	NOT	52	48	104	52	160	275	403	150
ARHGEF3	36.3576	0.448369	0.490845	0.913464	0.360999	0.583268	NOT	20	25	8	19	45	101	51	91
ARHGEF33	15.0177	-1.40902	0.731545	-1.92609	0.0540929	0.170731	NOT	17	19	14	2	22	14	17	4
ARHGEF37	243.088	0.640419	0.346233	1.84968	0.0643599	0.19168	NOT	94	149	132	82	386	614	740	286
ARHGEF38	6.12124	-0.704949	0.902626	-0.780998	0.434804	0.65075	NOT	9	0	6	4	7	9	9	7
ARHGEF39	132.754	0.0949635	0.395513	0.240102	0.810251	0.907369	NOT	41	41	150	94	179	324	295	152
ARHGEF4	8.09574	-1.2317	1.28721	-0.956872	0.338632	0.56246	NOT	8	17	0	0	4	12	1	16
ARHGEF40	79.6397	-0.0370996	0.342707	-0.108255	0.913794	0.960822	NOT	50	29	82	41	117	183	86	160
ARHGEF5	249.489	0.0105952	0.20555	0.0515455	0.958891	0.980904	NOT	177	104	189	141	486	472	398	370
ARHGEF6	85.2584	0.089619	0.276515	0.324102	0.745861	0.871598	NOT	52	49	46	52	187	149	149	118
ARHGEF7	318.68	0.442152	0.205826	2.14818	0.0316993	0.116719	NOT	122	134	208	199	624	787	599	531
ARHGEF9	9.46955	-0.302936	0.706978	-0.428493	0.668292	0.825798	NOT	8	7	5	5	12	22	5	20
ARID1A	217.261	-0.68399	0.228681	-2.99102	0.00278043	0.0182825	NOT	196	127	192	140	247	428	242	249
ARID1B	226.204	0.252023	0.220744	1.1417	0.25358	0.473268	NOT	119	90	187	116	425	566	321	402
ARID2	104.247	0.46945	0.359435	1.30608	0.191526	0.39781	NOT	59	21	101	41	227	284	160	178
ARID3A	109.205	0.896034	0.37198	2.40882	0.0160041	0.0699083	NOT	24	26	74	67	291	235	280	168
ARID3B	32.1091	0.718569	0.441025	1.62932	0.103246	0.266194	NOT	15	16	18	10	63	99	82	35
ARID3C	10.3151	1.21203	1.03201	1.17444	0.24022	0.457606	NOT	0	9	0	5	43	27	24	7
ARID4A	65.465	-0.424424	0.332342	-1.27707	0.201577	0.411017	NOT	62	37	59	26	117	119	80	74
ARID4B	180.541	0.458063	0.226567	2.02175	0.043202	0.145784	NOT	74	88	133	79	353	498	301	307
ARID5A	95.1765	-0.0436467	0.300441	-0.145275	0.884493	0.947118	NOT	57	56	49	70	184	129	156	164
ARID5B	68.7988	-0.144095	0.369186	-0.390304	0.696312	0.842259	NOT	67	22	32	54	122	141	102	89
ARIH1	165.556	-0.380828	0.320221	-1.18927	0.234334	0.450503	NOT	170	58	93	134	225	293	218	252
ARIH2	195.61	-0.739225	0.196487	-3.76221	0.000168415	0.00187058	NOT	138	124	163	171	254	336	218	212
ARL1	120.77	-0.738273	0.282944	-2.60925	0.00907397	0.0455109	NOT	79	78	122	92	234	156	139	100
ARL10	20.7456	-1.41022	0.559319	-2.52132	0.0116917	0.0552346	DOWN	25	18	20	10	29	21	23	6
ARL11	11.5985	-0.883283	0.864343	-1.02191	0.306822	0.53112	NOT	4	10	1	20	18	10	22	5
ARL13B	14.6638	-1.97154	0.812447	-2.42667	0.0152383	0.0673811	DOWN	17	0	26	17	7	13	6	15
ARL14	75.0464	0.111496	0.578853	0.192616	0.84726	0.927892	NOT	24	30	115	18	48	142	230	101
ARL14EP	78.7947	-0.186251	0.516511	-0.360594	0.718403	0.856526	NOT	23	106	33	31	125	204	128	64
ARL15	72.4844	-0.665398	0.282292	-2.35712	0.0184172	0.0776431	NOT	61	45	70	42	115	108	95	70
ARL16	236.662	0.179771	0.384149	0.467971	0.639806	0.807956	NOT	51	182	145	154	333	513	576	296
ARL2	167.375	-0.170753	0.307739	-0.554863	0.578988	0.766998	NOT	92	85	187	79	372	298	160	266
ARL2BP	47.5715	-1.62092	0.372393	-4.35271	1.34463e-05	0.00022912	DOWN	51	29	63	35	51	44	45	22
ARL3	54.2562	-0.854481	0.385353	-2.2174	0.0265958	0.102335	NOT	54	50	39	24	81	71	41	73
ARL4A	198.857	-0.195791	0.268729	-0.728581	0.466258	0.678733	NOT	106	107	141	163	267	295	389	298
ARL4C	58.205	-0.476112	0.49536	-0.961142	0.336481	0.560632	NOT	15	71	35	38	133	59	62	78
ARL4D	11.2884	-1.76225	0.744325	-2.36758	0.0179046	0.0759792	DOWN	14	9	8	11	14	19	2	3
ARL5A	323.362	-0.494817	0.26041	-1.90014	0.0574142	0.17784	NOT	261	199	312	157	652	468	424	316
ARL5B	187.811	0.292348	0.325672	0.897677	0.369358	0.591034	NOT	133	57	105	118	420	256	283	433
ARL6	13.6354	-0.958981	0.777368	-1.23363	0.217342	0.431782	NOT	12	2	13	18	14	40	12	3
ARL6IP1	755.301	1.26667	0.239174	5.296	1.18364e-07	4.04266e-06	UP	194	222	386	293	2583	1755	1438	1587
ARL6IP4	173.449	0.359342	0.290065	1.23883	0.215407	0.42943	NOT	53	88	134	99	260	435	373	275
ARL6IP5	22.6434	-0.417356	0.518951	-0.80423	0.421264	0.638937	NOT	15	17	20	11	29	44	13	48
ARL6IP6	158.822	0.356947	0.271812	1.31321	0.189112	0.395184	NOT	98	46	134	70	335	383	262	261
ARL8A	82.6618	0.199809	0.316733	0.630844	0.528143	0.729316	NOT	66	39	37	43	133	174	126	171
ARL8B	190.059	-0.511234	0.199718	-2.55978	0.010474	0.0507051	NOT	127	131	177	111	272	323	243	244
ARL9	12.5684	-0.262673	0.852893	-0.307979	0.758098	0.877875	NOT	3	1	28	5	19	30	7	25
ARMC1	137.661	0.475666	0.263807	1.80308	0.071375	0.206029	NOT	70	39	107	71	287	324	219	277
ARMC10	113.748	0.0910703	0.315912	0.288278	0.773134	0.886397	NOT	83	61	71	52	220	224	111	252
ARMC2	10.9442	-0.584041	0.778351	-0.750357	0.45304	0.667056	NOT	4	9	4	14	14	14	4	27
ARMC5	37.9821	0.515753	0.382536	1.34825	0.177579	0.380541	NOT	26	11	24	16	100	83	57	70
ARMC6	62.4103	0.198936	0.423446	0.469803	0.638496	0.807224	NOT	45	46	36	12	162	119	86	95
ARMC7	190.523	1.01376	0.284821	3.55928	0.00037188	0.00359047	NOT	55	54	93	108	386	523	518	324
ARMC8	38.3372	-0.587971	0.725793	-0.810109	0.417878	0.636108	NOT	50	0	51	17	45	84	44	43
ARMC9	19.9047	0.24416	0.525544	0.464585	0.642228	0.809892	NOT	4	11	18	12	42	29	35	40
ARMCX1	12.0352	-0.0171613	0.616902	-0.0278185	0.977807	0.990158	NOT	4	7	5	13	23	22	16	21
ARMCX2	7.05692	0.73407	0.925538	0.793127	0.427704	0.644722	NOT	2	7	0	3	9	17	17	16
ARMCX3	46.5084	-0.0502304	0.320994	-0.156484	0.875652	0.9422	NOT	26	27	40	23	80	83	69	81
ARMCX4	5.37852	1.30967	0.985319	1.32918	0.183787	0.389048	NOT	1	0	5	2	17	12	8	16
ARMCX5	17.8086	-1.09641	0.774736	-1.41521	0.157007	0.35103	NOT	25	9	26	1	22	44	10	8
ARMT1	44.4653	-0.189645	0.387479	-0.489432	0.624536	0.798185	NOT	42	15	29	30	89	96	44	63
ARNT	58.4833	-0.902693	0.390283	-2.31292	0.0207271	0.084571	NOT	29	67	37	47	84	58	62	72
ARNT2	7.02086	-0.80995	1.20387	-0.67279	0.501081	0.708185	NOT	7	0	17	0	17	4	3	11
ARNTL	59.7374	-0.666384	0.420427	-1.58502	0.112963	0.282215	NOT	57	33	24	61	65	98	105	49
ARNTL2	5.03017	-0.206858	1.20457	-0.171728	0.863652	0.936147	NOT	0	0	7	7	18	6	3	6
ARPC1A	804.345	0.411132	0.211998	1.93932	0.0524628	0.167017	NOT	539	303	411	425	1929	1639	1419	1336
ARPC1B	1055.5	-0.475145	0.238172	-1.99497	0.0460461	0.15249	NOT	821	678	572	871	2008	1488	1362	1224
ARPC2	879.755	-1.37917	0.170133	-8.10642	5.21345e-16	2.30464e-13	DOWN	725	733	822	799	961	828	789	765
ARPC3	1009.7	0.30319	0.205931	1.47229	0.140943	0.326937	NOT	620	369	593	628	2078	2047	2043	1489
ARPC4	890.571	0.563014	0.176376	3.19212	0.00141232	0.0104552	NOT	435	365	588	379	2136	1831	1641	1676
ARPC5	270.786	-2.35003	0.287895	-8.16281	3.27315e-16	1.48948e-13	DOWN	308	305	286	190	159	113	163	161
ARPC5L	88.9383	-1.62325	0.312318	-5.19744	2.02051e-07	6.35019e-06	DOWN	96	77	87	65	96	54	77	68
ARPIN	114.913	-1.10801	0.313979	-3.52894	0.000417231	0.00394825	NOT	128	41	119	101	136	155	108	107
ARPP19	258.945	-0.682125	0.222758	-3.06218	0.00219731	0.0150495	NOT	154	185	250	191	445	321	302	297
ARPP21	12.5554	-0.286805	0.842622	-0.340372	0.733577	0.865401	NOT	6	5	24	1	9	12	18	35
ARRB1	286.561	-0.693717	0.240689	-2.88222	0.00394889	0.0239128	NOT	272	195	188	197	452	373	295	381
ARRB2	148.901	-0.247892	0.296539	-0.835949	0.403184	0.622809	NOT	81	138	96	70	269	248	229	189
ARRDC1	330.786	0.574534	0.209296	2.74507	0.00604978	0.0333936	NOT	125	143	228	158	612	797	712	596
ARRDC2	234.808	0.788424	0.266036	2.96359	0.00304071	0.0195454	NOT	79	128	104	102	526	497	594	406
ARRDC3	109.713	-0.908825	0.290978	-3.12335	0.00178806	0.0127195	NOT	82	100	102	62	110	138	156	114
ARRDC4	316.714	-0.338761	0.242962	-1.3943	0.163228	0.359897	NOT	226	215	212	200	505	644	522	280
ARSA	128.107	0.389648	0.420728	0.926128	0.35438	0.577458	NOT	20	100	60	83	220	291	283	201
ARSB	11.0332	-0.511969	1.03845	-0.493013	0.622004	0.797055	NOT	9	6	17	1	18	45	7	0
ARSG	12.3144	1.71191	0.9735	1.75851	0.0786607	0.221344	NOT	12	0	2	0	20	53	33	26
ARSJ	7.70543	-0.578537	1.18545	-0.488032	0.625527	0.798705	NOT	18	0	0	4	16	19	5	5
ARSK	2.33393	-1.80289	1.87867	-0.959664	0.337225	0.561569	NOT	0	0	8	2	4	4	0	0
ART4	3.88505	-1.26197	2.05365	-0.614499	0.538886	0.737221	NOT	13	0	0	0	7	0	0	8
ARTN	7.74773	-0.480383	1.05269	-0.456341	0.648145	0.812926	NOT	0	10	10	2	14	17	14	1
ARV1	49.7408	-0.397863	0.484149	-0.821777	0.411204	0.629812	NOT	16	62	39	17	99	83	68	48
ARVCF	81.9539	-0.0582824	0.355279	-0.164047	0.869694	0.939354	NOT	50	61	33	54	142	188	77	152
ARX	3.05469	0.225316	1.38521	0.162658	0.870787	0.939943	NOT	5	0	2	0	10	5	7	1
AS3MT	151.988	-0.68221	0.348644	-1.95675	0.0503766	0.162313	NOT	109	101	130	116	145	266	299	94
ASAH1	111.253	1.17627	0.279105	4.21442	2.50416e-05	0.000390174	NOT	47	37	39	42	334	240	269	211
ASAH2	184.559	-0.763779	0.447406	-1.70713	0.087798	0.238611	NOT	66	226	94	157	138	481	166	195
ASAP1	96.2523	-0.614006	0.460258	-1.33405	0.182188	0.386933	NOT	147	45	31	54	139	143	91	149
ASAP2	78.7724	-1.10902	0.337048	-3.29038	0.00100051	0.00791218	NOT	72	35	94	67	97	116	91	46
ASAP3	42.6107	-0.44548	0.411649	-1.08218	0.279171	0.501257	NOT	28	15	41	38	67	58	38	83
ASB1	73.8503	0.692456	0.337528	2.05155	0.0402134	0.138571	NOT	45	15	38	41	153	228	139	120
ASB10	2.2263	3.87586	1.70336	2.27541	0.0228811	0.0912411	UP	0	0	0	0	3	13	7	8
ASB13	1148.08	1.00574	0.306542	3.28094	0.00103461	0.00812564	NOT	266	494	725	396	2754	1924	3219	2375
ASB14	28.0293	0.577112	0.407533	1.41611	0.156743	0.350706	NOT	16	13	18	8	57	75	50	51
ASB15	5.1364	-1.09726	1.33868	-0.81966	0.41241	0.630826	NOT	2	0	1	14	8	11	5	0
ASB16	5.40919	0.230267	1.05448	0.218369	0.827141	0.918901	NOT	4	4	4	0	2	8	11	17
ASB2	95.8542	0.23209	0.451071	0.514531	0.606881	0.78678	NOT	87	49	22	50	110	199	136	254
ASB3	39.4601	0.0542425	0.437945	0.123857	0.901429	0.955464	NOT	11	31	39	14	78	80	51	69
ASB6	41.3542	-0.594986	0.445808	-1.33462	0.181999	0.386746	NOT	26	29	47	21	87	84	22	43
ASB7	52.9749	-0.50302	0.329968	-1.52445	0.127396	0.305404	NOT	37	30	32	51	76	81	82	61
ASB8	49.3769	-0.521728	0.474056	-1.10056	0.271088	0.492516	NOT	11	36	63	35	87	100	68	32
ASB9	6.66759	-0.689197	1.17239	-0.587857	0.556628	0.750318	NOT	4	14	0	0	12	9	8	6
ASCC1	77.7772	0.175603	0.296393	0.592467	0.553538	0.747847	NOT	53	36	41	47	167	207	99	109
ASCC2	94.3818	0.102156	0.319945	0.319292	0.749505	0.873416	NOT	43	39	57	83	181	142	158	180
ASCC3	92.9579	-0.120069	0.442098	-0.27159	0.785937	0.894251	NOT	72	11	81	79	176	218	124	110
ASCL2	51.9297	0.275348	0.505155	0.545077	0.585701	0.771297	NOT	9	14	52	44	67	177	74	86
ASF1A	89.1705	0.295765	0.278939	1.06032	0.288999	0.511776	NOT	54	28	65	51	170	225	127	163
ASF1B	86.6901	-0.0863829	0.354837	-0.243444	0.807662	0.906437	NOT	70	33	54	61	152	217	156	68
ASGR2	15.3793	0.53446	0.807211	0.662107	0.507903	0.71348	NOT	8	0	6	17	16	55	42	15
ASH1L	150.678	-0.224449	0.279599	-0.802754	0.422117	0.639635	NOT	133	62	138	69	239	322	197	211
ASH2L	109.733	-0.660627	0.27651	-2.38916	0.0168869	0.0727782	NOT	106	57	107	61	147	182	110	150
ASIC1	8.41674	0.74326	1.12283	0.661952	0.508002	0.713555	NOT	13	0	0	2	28	21	19	6
ASIC2	5.63568	-0.352185	1.67306	-0.210503	0.833275	0.922007	NOT	15	0	0	0	10	9	0	15
ASIC3	2.9564	4.27888	1.67202	2.55911	0.0104941	0.0507866	UP	0	0	0	0	3	6	8	21
ASIP	4.81232	-1.00734	0.980402	-1.02747	0.304197	0.527875	NOT	3	6	2	4	4	8	1	9
ASL	399.483	0.626295	0.228304	2.74326	0.0060833	0.0335308	NOT	154	223	200	179	948	987	849	575
ASMTL	91.9187	0.741249	0.307904	2.40741	0.0160663	0.0700812	NOT	42	34	48	44	154	296	129	223
ASNA1	158.805	-0.968171	0.224734	-4.30808	1.6468e-05	0.000270193	NOT	144	109	144	115	216	235	127	171
ASNS	115.059	-0.587119	0.450186	-1.30417	0.192176	0.398999	NOT	41	57	62	174	252	159	134	96
ASNSD1	67.0925	0.0620025	0.310633	0.199601	0.841793	0.925541	NOT	44	37	49	30	129	107	136	94
ASPA	12.2614	-2.06771	0.856847	-2.41316	0.0158151	0.0693174	DOWN	11	11	25	3	9	15	0	10
ASPH	24.6552	-0.0495915	0.48339	-0.102591	0.918287	0.962258	NOT	19	20	15	6	52	53	31	33
ASPHD1	2.67432	-0.291547	1.67245	-0.174323	0.861612	0.935039	NOT	7	0	0	0	2	8	1	6
ASPHD2	5.53984	-0.0943274	1.29211	-0.0730026	0.941804	0.972996	NOT	0	6	0	7	8	1	9	16
ASPM	70.1853	0.678346	0.382682	1.77261	0.0762933	0.216272	NOT	26	17	45	46	123	196	191	88
ASPN	57.2443	0.520743	0.456653	1.14035	0.254142	0.473973	NOT	18	22	39	37	125	159	36	152
ASPRV1	30.3489	0.0116214	0.621521	0.0186982	0.985082	0.993317	NOT	11	19	12	30	29	68	96	15
ASPSCR1	761.498	0.69046	0.195428	3.53306	0.000410777	0.00389672	NOT	326	337	463	299	1404	1774	1747	1488
ASRGL1	948.745	0.75677	0.191747	3.94672	7.92288e-05	0.000998231	NOT	388	374	540	425	2551	2568	1870	1345
ASS1	1347.88	-1.45926	0.807306	-1.80757	0.0706742	0.204578	NOT	1117	622	219	2732	690	666	1956	1350
ASTE1	26.3297	-0.143504	0.56947	-0.251996	0.801044	0.903006	NOT	23	6	24	16	46	49	65	13
ASTN2	3.90575	3.88493	1.3929	2.7891	0.00528552	0.0300542	UP	1	0	0	0	15	14	8	14
ASXL1	282.904	0.429506	0.289033	1.48601	0.137277	0.321076	NOT	95	118	173	204	431	632	690	459
ASXL2	154.49	0.157091	0.291103	0.53964	0.589445	0.774143	NOT	71	95	120	71	264	492	212	194
ASXL3	5.00759	3.4349	1.44379	2.37909	0.0173555	0.0741779	UP	0	2	0	0	20	6	27	7
ATAD1	45.287	-0.756875	0.381455	-1.98418	0.0472358	0.155463	NOT	41	20	35	43	61	53	74	41
ATAD2	79.1484	-0.0849228	0.359521	-0.236211	0.813269	0.909646	NOT	67	19	61	55	153	190	90	109
ATAD2B	27.9359	-1.14012	0.510332	-2.23407	0.0254783	0.0991948	NOT	31	22	31	10	39	33	37	12
ATAD5	35.2909	-0.0604648	0.386548	-0.156422	0.8757	0.9422	NOT	21	12	28	28	66	68	40	65
ATAT1	48.1202	0.161036	0.435315	0.369929	0.711435	0.852554	NOT	21	16	54	24	48	133	98	74
ATCAY	11.5579	-0.973142	0.974884	-0.998212	0.318176	0.542611	NOT	18	6	14	0	18	18	1	18
ATE1	112.825	-0.302335	0.341836	-0.884445	0.376456	0.598345	NOT	39	65	99	103	156	200	220	117
ATF1	96.6529	-0.733619	0.351533	-2.08691	0.036896	0.130156	NOT	83	39	136	47	131	122	132	111
ATF2	110.164	-0.261879	0.265522	-0.986281	0.323995	0.548277	NOT	71	65	99	60	216	222	109	155
ATF3	107.608	0.716772	0.513369	1.39621	0.162651	0.359248	NOT	112	31	24	27	225	144	205	313
ATF4	3003.79	0.309357	0.237598	1.30202	0.19291	0.39988	NOT	1334	1008	2176	2126	6661	5329	4928	5765
ATF5	186.038	0.562974	0.312574	1.80109	0.0716889	0.206626	NOT	70	92	73	125	587	371	286	295
ATF6	79.2246	0.200483	0.36591	0.547903	0.583758	0.769852	NOT	43	33	82	27	205	184	85	123
ATF6B	179.959	0.0419697	0.232371	0.180615	0.85667	0.933035	NOT	109	83	133	110	392	402	283	202
ATF7	112.71	-0.306289	0.271791	-1.12693	0.259772	0.480061	NOT	81	53	112	63	194	222	114	173
ATF7IP	111.897	-0.556799	0.238126	-2.33825	0.0193741	0.0804233	NOT	88	64	89	84	170	219	116	130
ATF7IP2	14.9938	0.41184	0.687609	0.598945	0.54921	0.744534	NOT	4	2	16	11	27	65	17	17
ATG10	31.8013	-0.180009	0.576275	-0.312366	0.754763	0.876761	NOT	9	25	46	5	57	77	42	35
ATG101	124.679	0.1069	0.238393	0.44842	0.65385	0.816372	NOT	69	77	91	55	218	250	216	203
ATG12	42.2383	-2.37306	0.427017	-5.55731	2.73968e-08	1.10964e-06	DOWN	51	31	42	48	26	21	11	35
ATG13	284.517	0.808933	0.217627	3.71706	0.000201552	0.00217463	NOT	122	121	174	90	680	836	489	527
ATG14	35.7274	0.808772	0.455419	1.77589	0.0757516	0.215051	NOT	21	4	16	23	70	109	69	69
ATG16L1	173.022	0.520783	0.277152	1.87905	0.0602372	0.183499	NOT	50	83	100	113	337	447	366	262
ATG16L2	27.1499	0.658802	0.468729	1.40551	0.15987	0.355418	NOT	10	9	11	21	52	47	63	61
ATG2A	104.246	0.746608	0.303372	2.46103	0.013854	0.0628313	NOT	50	53	59	27	178	293	225	204
ATG2B	79.406	0.350196	0.414191	0.845494	0.397835	0.617856	NOT	58	24	31	56	154	263	151	67
ATG3	139.031	-0.84093	0.238327	-3.52848	0.000417955	0.00395183	NOT	121	95	94	120	199	194	159	136
ATG4A	52.4519	-0.475861	0.393166	-1.21033	0.226152	0.44119	NOT	34	25	60	33	69	49	84	90
ATG4B	38.9899	-0.341523	0.380714	-0.89706	0.369687	0.591438	NOT	20	20	47	22	48	77	51	62
ATG4C	36.9291	-1.03242	0.516614	-1.99843	0.0456696	0.151738	NOT	29	53	25	9	43	46	44	33
ATG4D	190.498	0.305614	0.250077	1.22208	0.221677	0.436211	NOT	112	103	128	72	439	438	349	240
ATG5	106.764	-1.14908	0.313444	-3.66597	0.000246403	0.00257243	NOT	141	56	98	65	122	136	96	105
ATG7	56.886	-0.252026	0.291373	-0.864959	0.387062	0.607126	NOT	33	37	42	38	82	99	82	92
ATG9A	216.051	0.918987	0.244792	3.75415	0.000173932	0.00192219	NOT	67	91	130	79	576	673	357	382
ATG9B	5.73198	-0.825177	1.2284	-0.671752	0.501741	0.708556	NOT	3	5	0	9	17	9	4	0
ATIC	62.3224	0.0346077	0.409728	0.0844652	0.932687	0.968687	NOT	33	20	79	25	106	148	122	65
ATL2	213.408	0.634428	0.265404	2.39042	0.0168289	0.0725891	NOT	132	55	115	109	409	646	357	403
ATL3	106.598	0.314912	0.301564	1.04426	0.296365	0.520213	NOT	46	55	86	47	273	219	124	204
ATM	75.8912	0.64125	0.306141	2.09462	0.0362046	0.128565	NOT	29	24	39	53	165	166	147	155
ATMIN	84.7985	-0.732414	0.273329	-2.67961	0.00737086	0.0388294	NOT	56	73	74	53	125	117	111	85
ATN1	310.279	-0.180615	0.301678	-0.598701	0.549372	0.744678	NOT	218	170	194	216	533	541	244	677
ATOH1	27.7114	-0.499085	0.700702	-0.712265	0.476301	0.687309	NOT	18	31	7	19	97	21	32	10
ATOH8	31.4625	-1.66805	0.628434	-2.65431	0.00794718	0.0411509	DOWN	40	36	33	6	21	31	8	43
ATOX1	611.937	1.63318	0.256835	6.35888	2.03225e-10	1.72764e-08	UP	169	174	153	221	1680	2252	1643	916
ATP10A	22.3147	0.28223	0.66304	0.42566	0.670355	0.827224	NOT	15	1	13	21	46	36	20	64
ATP10B	197.427	1.28044	0.254928	5.02277	5.09315e-07	1.41055e-05	UP	72	51	98	63	529	412	528	427
ATP10D	24.2079	2.05932	0.638736	3.22406	0.00126388	0.00955754	UP	4	6	0	12	76	77	51	65
ATP11A	279.181	1.0028	0.394518	2.54182	0.0110277	0.0526768	NOT	34	75	221	141	554	832	582	607
ATP11B	85.5016	-1.0757	0.323489	-3.3253	0.000883238	0.00717347	NOT	87	78	65	48	121	122	59	83
ATP11C	45.0538	0.015712	0.454204	0.0345922	0.972405	0.988038	NOT	14	24	35	37	93	128	74	29
ATP13A1	213.146	0.0488916	0.232548	0.210243	0.833478	0.922166	NOT	81	122	167	143	391	479	322	315
ATP13A2	108.273	0.377768	0.338868	1.11479	0.264939	0.485852	NOT	40	27	103	68	241	261	155	196
ATP13A3	101.224	0.375825	0.30442	1.23456	0.216993	0.431311	NOT	79	38	52	45	248	183	181	171
ATP1A1	1227.65	0.516208	0.241464	2.13783	0.0325308	0.118735	NOT	419	583	557	876	2574	2961	2222	2221
ATP1A2	106.433	1.44678	0.49668	2.91291	0.00358082	0.02227	UP	57	22	27	32	123	349	118	468
ATP1A3	17.5872	1.66123	0.919262	1.80714	0.0707403	0.204693	NOT	5	13	1	0	35	64	11	74
ATP1B1	221.601	-0.602367	0.292648	-2.05834	0.0395579	0.136922	NOT	91	137	190	235	310	287	293	306
ATP1B2	23.7771	1.08504	0.574047	1.89015	0.0587377	0.180566	NOT	8	4	14	12	44	76	21	83
ATP1B3	199.633	1.87495	0.308075	6.08602	1.15752e-09	7.46202e-08	UP	47	60	47	51	477	405	626	582
ATP23	37.6082	0.211508	0.349487	0.605197	0.545048	0.741557	NOT	21	21	26	17	79	96	54	54
ATP2A1	4.82521	-0.463946	1.12487	-0.412442	0.680015	0.832505	NOT	2	0	11	2	5	4	14	4
ATP2A2	511.29	1.52767	0.205578	7.43113	1.07673e-13	2.82359e-11	UP	163	123	201	159	1621	1203	1097	1272
ATP2A3	612.911	0.815672	0.245545	3.32188	0.000894129	0.00724502	NOT	171	224	427	281	1708	1638	1069	1044
ATP2B1	889.923	2.58996	0.290024	8.93015	4.25443e-19	4.11403e-16	UP	78	166	185	187	3186	2390	2897	1949
ATP2B2	4.2297	0.548889	1.19717	0.45849	0.6466	0.812201	NOT	0	2	7	0	6	16	5	9
ATP2B3	3.54602	1.5553	1.95135	0.797039	0.425429	0.642733	NOT	0	0	5	0	2	1	0	30
ATP2B4	281.412	0.88111	0.438565	2.00908	0.0445291	0.148835	NOT	165	65	99	152	393	750	248	1086
ATP2C1	116.791	0.438752	0.29934	1.46573	0.142722	0.329532	NOT	58	36	64	85	255	330	148	212
ATP2C2	456.136	0.188105	0.215992	0.870889	0.383815	0.604785	NOT	202	198	386	271	731	1178	740	735
ATP5A1	2181.98	-0.176519	0.201687	-0.875211	0.381459	0.6029	NOT	1815	1177	1378	1235	4022	4220	3379	2593
ATP5B	2068.18	-0.809448	0.218523	-3.70418	0.000212074	0.00226652	NOT	2130	1224	1596	1444	3022	2489	2623	2144
ATP5C1	647.505	-0.710242	0.202645	-3.50486	0.000456847	0.00423761	NOT	607	382	469	490	953	862	824	728
ATP5D	1172.52	-0.25638	0.206823	-1.23961	0.215119	0.429092	NOT	851	782	895	568	2118	2156	1311	1817
ATP5E	2001.55	0.918242	0.19413	4.73003	2.24488e-06	5.09277e-05	NOT	767	738	949	919	5405	4601	4829	3164
ATP5F1	805.715	-0.338235	0.216955	-1.55901	0.118993	0.291954	NOT	642	392	524	628	1567	1483	1018	900
ATP5G1	1229.23	0.425988	0.195485	2.17913	0.0293223	0.109982	NOT	720	607	562	633	3009	2702	2028	2021
ATP5G2	564.08	-0.413417	0.204775	-2.01889	0.0434992	0.1465	NOT	502	316	379	364	979	1009	649	726
ATP5G3	1094.11	-1.24084	0.205172	-6.04783	1.46811e-09	8.99204e-08	DOWN	1000	914	983	821	1363	982	973	1114
ATP5H	378.822	-0.665467	0.19409	-3.42866	0.000606569	0.00531718	NOT	297	294	292	238	577	576	402	469
ATP5I	1086.65	0.878498	0.21076	4.16824	3.06962e-05	0.000463348	NOT	437	333	648	475	2794	2876	2531	1568
ATP5J	377.785	-0.575347	0.203739	-2.82395	0.00474363	0.0275088	NOT	323	259	311	205	512	700	455	444
ATP5J2	674.102	-0.0054775	0.252784	-0.0216687	0.982712	0.992534	NOT	367	396	322	533	1330	1420	1187	741
ATP5L	671.687	0.103776	0.172285	0.602351	0.546941	0.743021	NOT	377	349	450	401	1483	1252	1113	950
ATP5O	718.173	-0.812613	0.158962	-5.11201	3.1875e-07	9.5023e-06	NOT	552	498	609	565	1091	1017	762	740
ATP5S	46.0014	-0.429924	0.365561	-1.17606	0.239569	0.456817	NOT	41	32	22	31	71	92	45	65
ATP5SL	446.437	0.517441	0.198585	2.60564	0.00917039	0.0457839	NOT	255	171	294	183	1008	1061	885	685
ATP6	1.99207e+06	-1.90493	0.318835	-5.97465	2.30583e-09	1.34012e-07	DOWN	2051600	2319689	1545404	1552819	1183471	938101	1687660	1734158
ATP6AP1	238.058	0.836596	0.200778	4.16677	3.08942e-05	0.000465428	NOT	97	92	145	86	600	612	432	470
ATP6AP1L	11.3412	0.492005	0.649909	0.757037	0.449028	0.663993	NOT	8	4	6	5	23	33	28	9
ATP6AP2	122.935	0.0767267	0.23397	0.327934	0.742962	0.869791	NOT	62	68	88	74	263	273	188	157
ATP6V0A1	140.304	1.54192	0.318529	4.84076	1.29344e-06	3.17652e-05	UP	19	52	46	56	361	433	305	342
ATP6V0A2	64.2237	0.536033	0.294621	1.8194	0.0688505	0.200606	NOT	28	29	39	32	161	140	130	94
ATP6V0A4	2.72396	-3.62539	1.84655	-1.96333	0.0496078	0.160785	DOWN	7	0	6	0	2	1	0	0
ATP6V0B	181.915	0.583152	0.346958	1.68076	0.0928101	0.247213	NOT	33	94	98	128	408	488	285	339
ATP6V0C	1162.54	0.921405	0.185801	4.95909	7.08234e-07	1.86357e-05	NOT	408	453	526	563	3301	2894	2070	2275
ATP6V0D1	293.993	0.700341	0.225269	3.10891	0.00187777	0.0132299	NOT	153	125	136	128	856	704	517	457
ATP6V0E1	221.342	0.183013	0.189744	0.964526	0.334783	0.559051	NOT	113	101	149	144	426	479	340	381
ATP6V1A	55.4463	-2.13713	0.499541	-4.27819	1.88421e-05	0.000304943	DOWN	32	28	51	110	30	26	28	53
ATP6V1B2	205.6	-0.530723	0.239999	-2.21135	0.0270115	0.103557	NOT	127	159	167	135	286	304	342	217
ATP6V1C1	107.378	-0.357312	0.323756	-1.10365	0.269747	0.490879	NOT	59	55	71	108	177	129	138	191
ATP6V1C2	163.975	1.22348	0.309252	3.95627	7.61285e-05	0.000964668	UP	68	77	57	33	513	420	337	317
ATP6V1D	95.5146	-1.41516	0.327774	-4.31749	1.5781e-05	0.000261291	DOWN	111	57	121	55	117	88	63	91
ATP6V1E1	457.917	-0.388758	0.238992	-1.62666	0.10381	0.266898	NOT	408	276	262	302	739	632	685	640
ATP6V1E2	2.79551	-0.737343	1.7632	-0.418185	0.675812	0.830004	NOT	0	3	0	5	0	1	1	11
ATP6V1F	231.386	-0.109446	0.279126	-0.392103	0.694982	0.841571	NOT	80	158	173	172	500	399	312	327
ATP6V1G1	255.793	-1.58116	0.197078	-8.023	1.03197e-15	4.20176e-13	DOWN	200	215	291	231	269	259	164	198
ATP6V1G2	8.13403	-1.3	1.27725	-1.01781	0.308767	0.533413	NOT	1	17	9	0	4	11	0	17
ATP6V1H	90.4585	-0.8625	0.263631	-3.27162	0.00106933	0.00834781	NOT	82	66	71	63	111	109	116	101
ATP7A	20.344	0.471132	0.489911	0.961669	0.336216	0.560454	NOT	8	10	8	15	45	51	43	25
ATP7B	215.327	1.27643	0.303558	4.2049	2.61192e-05	0.00040331	UP	50	62	111	88	424	898	504	334
ATP8	21184.8	-2.75829	1.76671	-1.56126	0.118464	0.290839	NOT	36277	44138	1830	426	558	299	32128	499
ATP8A1	120.428	1.12543	0.257985	4.36237	1.28663e-05	0.000220941	NOT	34	46	68	38	273	365	268	239
ATP8B1	371.086	0.391921	0.221839	1.76669	0.0772796	0.21858	NOT	147	171	278	195	661	1097	575	624
ATP8B2	20.2774	-1.44191	0.577424	-2.49715	0.0125197	0.058152	DOWN	31	4	17	21	22	23	18	13
ATP8B3	5.40889	2.94445	1.62388	1.81322	0.0697974	0.202685	NOT	0	0	0	3	8	28	31	0
ATP8B4	6.27496	-0.733921	1.10355	-0.665053	0.506017	0.712383	NOT	6	6	0	6	9	4	1	17
ATP9A	393.906	0.576654	0.225625	2.55581	0.0105941	0.0511268	NOT	123	173	269	213	851	947	653	803
ATP9B	103.533	0.675932	0.362466	1.86481	0.0622075	0.187654	NOT	19	55	69	52	166	271	246	190
ATPAF1	182.565	-0.460644	0.250534	-1.83865	0.0659666	0.194856	NOT	167	99	112	133	309	292	200	259
ATPAF2	257.647	1.17092	0.218594	5.35659	8.48071e-08	3.02335e-06	NOT	85	63	127	116	714	727	498	538
ATPIF1	562.317	-0.687145	0.192917	-3.56186	0.000368234	0.00356751	NOT	499	309	414	464	806	838	694	632
ATR	59.8271	0.49715	0.407105	1.22119	0.222016	0.436693	NOT	38	16	55	16	139	166	116	72
ATRAID	73.894	0.749847	0.326085	2.29955	0.0214738	0.0870234	NOT	28	29	28	48	138	223	165	118
ATRIP	13.6716	-0.50633	0.912983	-0.554589	0.579176	0.766998	NOT	29	0	5	5	23	29	20	8
ATRN	77.7768	1.86415	0.498937	3.73624	0.000186795	0.00204536	UP	17	13	7	43	298	227	215	109
ATRNL1	6.86061	-0.0774878	0.929352	-0.0833783	0.933551	0.969129	NOT	0	8	7	2	8	12	9	16
ATRX	86.5853	-0.852052	0.261512	-3.25818	0.00112131	0.00866148	NOT	83	51	75	63	124	129	80	96
ATXN1	72.7433	-0.581432	0.311866	-1.86436	0.0622708	0.187783	NOT	57	57	41	53	95	94	105	100
ATXN10	96.4407	-0.497034	0.299622	-1.65887	0.0971425	0.255306	NOT	63	63	94	57	143	158	81	169
ATXN1L	66.9548	-0.5868	0.350088	-1.67615	0.0937086	0.248699	NOT	64	39	29	60	86	103	91	86
ATXN2	123.503	-0.0772457	0.232118	-0.332786	0.739296	0.867991	NOT	91	59	97	64	207	252	175	197
ATXN2L	273.847	-0.0958532	0.286835	-0.334176	0.738247	0.867806	NOT	122	181	294	104	446	561	401	422
ATXN3	58.2139	-1.92938	0.330191	-5.84322	5.12003e-09	2.59293e-07	DOWN	60	48	52	63	56	51	24	38
ATXN7	114.731	-0.221269	0.24044	-0.920267	0.357433	0.580295	NOT	90	53	84	75	173	242	169	152
ATXN7L1	115.143	-0.463329	0.273535	-1.69386	0.0902922	0.243084	NOT	60	70	88	107	150	253	141	135
ATXN7L2	188.777	0.167624	0.408012	0.41083	0.681197	0.83333	NOT	35	107	153	142	192	389	397	371
ATXN7L3	164.836	0.304831	0.262631	1.16068	0.245772	0.464035	NOT	116	60	101	84	393	355	210	306
ATXN7L3B	214.828	-1.33447	0.249458	-5.34949	8.82045e-08	3.11575e-06	DOWN	190	155	269	145	246	218	143	232
AUH	48.0515	-0.923321	0.342988	-2.69199	0.00710272	0.0377149	NOT	42	19	51	44	57	62	54	55
AUNIP	3.27865	-1.1558	1.23114	-0.938805	0.347831	0.571227	NOT	5	1	2	3	7	2	5	0
AUP1	740.997	0.740106	0.190214	3.89091	9.98676e-05	0.00120258	NOT	237	311	443	369	1683	1906	1364	1456
AURKA	121.774	0.128791	0.276679	0.465488	0.641582	0.809534	NOT	76	36	105	73	232	272	209	171
AURKAIP1	894.997	1.2227	0.190341	6.42372	1.3298e-10	1.22468e-08	UP	267	242	485	337	2391	2453	1814	1993
AURKB	136.349	-0.129327	0.275604	-0.469251	0.63889	0.807459	NOT	66	52	124	112	210	308	199	191
AUTS2	26.0188	-0.408209	0.505498	-0.807539	0.419356	0.637589	NOT	16	7	31	21	53	58	18	31
AVEN	33.516	-1.42143	0.385707	-3.68526	0.000228467	0.00241286	DOWN	39	21	25	33	31	35	27	32
AVIL	288.782	-0.638253	0.22245	-2.86919	0.00411523	0.0245833	NOT	237	220	217	174	444	493	267	369
AVL9	132.159	-0.555571	0.346774	-1.60212	0.10913	0.276253	NOT	118	44	154	79	238	260	155	105
AVPI1	192.36	0.535958	0.252197	2.12516	0.0335736	0.121431	NOT	95	76	105	107	527	483	238	347
AVPR1A	2.82295	2.51769	1.59562	1.57788	0.114594	0.284804	NOT	0	0	0	2	4	8	4	16
AVPR2	2.65263	0.606911	1.82282	0.332952	0.739171	0.867991	NOT	5	0	0	0	8	5	0	9
AXIN1	199.441	-0.293054	0.218089	-1.34374	0.179034	0.382176	NOT	113	101	205	126	311	366	270	291
AXIN2	69.3923	0.0111341	0.472743	0.0235521	0.98121	0.991946	NOT	32	12	97	38	108	132	81	156
AXL	56.0642	-0.0376482	0.368213	-0.102246	0.918562	0.962261	NOT	31	43	40	23	89	129	55	111
AZGP1	47.0612	-0.00781321	0.442859	-0.0176427	0.985924	0.993501	NOT	17	31	38	29	94	39	84	94
AZI2	180.808	-0.0243265	0.240751	-0.101044	0.919515	0.962628	NOT	95	77	141	136	309	403	317	218
AZIN1	471.683	-0.602917	0.164484	-3.6655	0.000246854	0.00257541	NOT	328	290	392	377	751	728	527	583
AZIN2	4.41439	1.12711	1.14874	0.98117	0.326509	0.550611	NOT	4	0	3	0	8	14	5	15
B2M	883.075	0.659251	0.29469	2.2371	0.0252799	0.0985967	NOT	279	374	332	661	1537	2351	2030	1526
B3GALNT1	11.9697	0.957588	0.690165	1.38748	0.165297	0.36271	NOT	2	5	7	6	28	47	29	9
B3GALNT2	80.1439	0.664095	0.339062	1.95863	0.0501565	0.161772	NOT	24	46	59	23	159	212	141	167
B3GALT1	2.85504	-0.752983	1.57301	-0.478689	0.63216	0.80302	NOT	6	0	3	0	8	3	0	4
B3GALT2	25.9784	0.891325	1.01226	0.880528	0.378574	0.600624	NOT	1	11	24	10	56	42	128	0
B3GALT4	45.9289	1.25231	0.553271	2.26346	0.0236076	0.0935596	UP	25	27	7	4	98	175	91	90
B3GALT5	334.143	0.104026	0.310542	0.334981	0.73764	0.86749	NOT	95	167	323	217	518	892	593	422
B3GALT6	45.5917	1.01463	0.447776	2.26594	0.023455	0.0930502	NOT	17	7	39	14	137	117	65	106
B3GAT2	4.42974	4.86953	1.39907	3.48055	0.000500383	0.00454366	UP	0	0	0	0	23	17	10	12
B3GAT3	291.29	0.711011	0.240899	2.95149	0.00316242	0.0201769	NOT	139	100	118	178	558	805	505	632
B3GLCT	19.4414	-0.128968	0.655297	-0.196809	0.843977	0.926823	NOT	1	11	17	21	43	27	21	36
B3GNT2	45.6496	0.924656	0.429339	2.15367	0.0312658	0.115483	NOT	19	15	37	8	138	116	67	96
B3GNT3	47.6891	-0.269417	0.376502	-0.715581	0.47425	0.685885	NOT	16	38	44	29	79	69	78	68
B3GNT5	53.0577	-0.357845	0.597342	-0.599063	0.549131	0.744493	NOT	59	51	26	4	103	61	88	63
B3GNT6	5.95055	1.62618	1.26759	1.28289	0.199529	0.408295	NOT	0	0	0	7	12	9	23	15
B3GNT8	290.213	1.58458	0.427522	3.70643	0.0002102	0.00225222	UP	26	116	170	48	904	700	672	700
B3GNT9	8.83749	0.45947	0.822969	0.558308	0.576634	0.765136	NOT	9	3	4	2	13	18	6	32
B3GNTL1	163.905	1.00012	0.242707	4.1207	3.77722e-05	0.00054516	NOT	75	48	67	76	332	495	387	299
B4GALNT1	11.6866	2.5599	0.821656	3.11553	0.00183613	0.0129897	UP	3	4	1	0	40	52	33	16
B4GALNT2	9.79956	0.887483	0.839621	1.057	0.290509	0.51357	NOT	5	1	5	6	6	16	41	20
B4GALNT3	72.1187	-0.0613123	0.397266	-0.154336	0.877345	0.943314	NOT	32	18	70	65	140	139	74	136
B4GALNT4	8.48595	-1.45132	0.890228	-1.63028	0.103043	0.265758	NOT	7	0	14	11	12	13	4	4
B4GALT1	137.085	2.13291	0.335664	6.35431	2.09365e-10	1.7701e-08	UP	14	29	35	46	485	474	350	251
B4GALT2	155.106	0.263727	0.256729	1.02726	0.3043	0.527995	NOT	81	99	73	84	317	354	207	293
B4GALT3	55.2258	-0.0104264	0.411609	-0.0253309	0.979791	0.991454	NOT	37	15	40	45	137	108	45	95
B4GALT4	7.47247	-0.812577	0.755214	-1.07596	0.281947	0.50396	NOT	3	7	6	7	10	18	4	7
B4GALT5	300.493	0.0814058	0.300548	0.270858	0.7865	0.894471	NOT	163	191	190	161	546	687	672	243
B4GALT6	20.4659	0.0429413	0.739506	0.0580675	0.953695	0.978875	NOT	7	10	5	26	27	79	6	39
B4GALT7	97.6424	-0.0283726	0.390228	-0.0727077	0.942039	0.973102	NOT	20	53	110	64	199	219	125	135
B4GAT1	10.9192	-0.12309	1.31624	-0.0935166	0.925493	0.965495	NOT	0	11	0	15	24	30	0	21
B9D1	109.267	0.966293	0.382148	2.52858	0.0114524	0.05437	NOT	16	32	62	73	217	320	239	223
B9D2	63.923	0.303051	0.385127	0.786886	0.431348	0.648258	NOT	14	38	41	46	153	138	121	78
BABAM1	249.518	-0.30518	0.231202	-1.31997	0.186844	0.39319	NOT	200	149	197	126	449	439	390	267
BABAM2	35.3968	-1.2417	0.430185	-2.88642	0.00389646	0.0236602	DOWN	15	24	50	35	28	46	28	43
BACE1	63.7047	1.15501	0.422761	2.73207	0.0062938	0.0344456	NOT	24	36	9	23	135	199	150	123
BACE2	144.19	2.26174	0.383608	5.89597	3.72494e-09	1.92107e-07	UP	16	40	35	29	651	360	419	219
BACH1	114.701	-0.569825	0.323456	-1.76168	0.0781237	0.22021	NOT	62	60	90	123	217	158	165	98
BACH2	6.59014	-1.99613	1.3241	-1.50754	0.131672	0.312075	NOT	6	17	0	0	1	3	5	8
BAD	125.387	0.0429638	0.27137	0.158322	0.874203	0.941535	NOT	48	79	82	90	190	258	207	217
BAG1	556.388	-0.023698	0.223829	-0.105876	0.915681	0.961234	NOT	307	339	438	285	1118	905	1066	685
BAG2	19.6968	0.741297	0.784472	0.944962	0.344678	0.568158	NOT	5	0	18	15	35	57	13	66
BAG3	75.8264	0.0615554	0.289486	0.212637	0.83161	0.921154	NOT	40	41	40	58	137	151	104	140
BAG4	171.223	1.04865	0.313616	3.34372	0.000826626	0.00681383	NOT	51	43	91	91	395	524	468	220
BAG5	144.263	-0.268287	0.20321	-1.32024	0.186754	0.393123	NOT	87	77	124	99	237	267	200	201
BAG6	397.451	-0.187195	0.229494	-0.815688	0.414679	0.63292	NOT	180	241	322	291	556	710	723	549
BAHCC1	77.6503	0.694514	0.348028	1.99557	0.0459809	0.152338	NOT	20	28	69	32	161	213	126	167
BAHD1	106.794	0.557901	0.246682	2.26162	0.023721	0.0938647	NOT	61	40	67	44	253	253	174	201
BAIAP2	28.5591	0.0914741	0.630937	0.144981	0.884726	0.947136	NOT	22	29	2	10	58	55	40	49
BAIAP2L1	422.516	-0.245311	0.209095	-1.1732	0.240714	0.458263	NOT	311	242	284	274	806	713	688	461
BAIAP2L2	415.168	0.0566403	0.321115	0.176386	0.85999	0.934365	NOT	210	251	292	236	483	1214	911	366
BAIAP3	25.8828	0.615733	0.753867	0.816766	0.414062	0.632463	NOT	10	0	20	22	17	95	68	39
BAK1	1064.11	1.53332	0.215585	7.11237	1.14064e-12	2.15219e-10	UP	298	284	515	256	3191	2609	2566	2452
BAMBI	10.287	-1.48382	0.727976	-2.03828	0.041522	0.14154	DOWN	9	14	9	4	17	10	8	3
BANF1	1029.27	0.137658	0.229365	0.600168	0.548394	0.743968	NOT	757	391	588	652	2314	2145	1316	1715
BANK1	29.3584	-1.49212	0.378951	-3.9375	8.23346e-05	0.00102567	DOWN	29	25	28	23	31	33	23	20
BANP	155.758	0.36981	0.313699	1.17887	0.23845	0.455469	NOT	63	118	90	54	265	372	241	329
BAP1	326.38	0.0231042	0.219908	0.105063	0.916326	0.961548	NOT	210	131	292	171	572	783	452	493
BARD1	11.0125	-1.02047	0.686983	-1.48543	0.13743	0.321245	NOT	11	2	13	11	6	17	13	14
BARX2	28.7066	0.143828	0.433877	0.331495	0.740271	0.868492	NOT	12	18	19	17	37	48	57	60
BASP1	173.621	-1.25365	0.323377	-3.87674	0.000105865	0.00126093	DOWN	99	165	241	98	169	181	130	219
BATF	76.5414	0.634496	0.405708	1.56392	0.117836	0.290267	NOT	50	43	31	19	215	107	172	134
BATF2	275.698	-0.118252	0.407955	-0.289865	0.77192	0.885594	NOT	223	97	126	248	530	221	370	629
BATF3	60.562	-0.291179	0.488161	-0.59648	0.550854	0.74611	NOT	13	64	59	25	129	66	87	87
BAX	230.44	-0.571565	0.240701	-2.37458	0.0175689	0.0748505	NOT	137	175	233	129	302	317	315	326
BAZ1A	1602.81	-0.631251	0.266794	-2.36606	0.0179786	0.076168	NOT	1198	1271	1207	1014	1693	1769	2157	2766
BAZ1B	66.9932	-0.918562	0.315736	-2.90927	0.00362272	0.0224472	NOT	68	56	40	45	87	95	67	71
BAZ2A	292.647	0.241315	0.267344	0.902639	0.366717	0.588879	NOT	159	155	253	95	595	582	581	420
BAZ2B	107.01	0.493811	0.377093	1.30952	0.190358	0.396128	NOT	86	20	72	43	229	301	211	137
BBC3	11.7021	-0.553117	0.611128	-0.905077	0.365425	0.587596	NOT	8	10	12	4	13	28	14	12
BBIP1	71.2434	0.213148	0.346509	0.615129	0.538469	0.736752	NOT	33	27	69	36	106	133	167	113
BBOX1	38.9735	0.892606	0.566323	1.57614	0.114993	0.285511	NOT	31	13	16	6	62	78	153	46
BBS1	16.4349	0.213025	0.781086	0.272729	0.785061	0.893714	NOT	10	0	24	6	37	31	13	41
BBS10	5.08552	-0.518239	1.26512	-0.409637	0.682072	0.833937	NOT	5	0	11	0	6	13	1	10
BBS12	5.52517	0.937873	1.01685	0.922336	0.356354	0.579089	NOT	2	1	0	6	18	8	12	11
BBS2	23.787	-0.437673	0.504892	-0.866865	0.386016	0.606154	NOT	19	9	10	28	29	48	26	37
BBS4	151.638	0.104263	0.275564	0.378362	0.705162	0.848631	NOT	62	83	90	119	227	344	217	294
BBS5	13.9676	-0.22595	0.598176	-0.377732	0.70563	0.848951	NOT	13	11	8	4	33	26	18	13
BBS9	3.25029	0.935016	1.36491	0.685041	0.493318	0.701463	NOT	1	0	5	0	15	5	2	8
BBX	90.299	-0.737343	0.305148	-2.41634	0.0156774	0.0688701	NOT	73	34	84	88	139	127	91	111
BCAM	204.75	1.61172	0.478286	3.36977	0.0007523	0.0063053	UP	73	30	39	102	574	514	164	849
BCAN	18.5469	2.25967	1.02186	2.21132	0.0270137	0.103557	UP	9	1	6	0	19	47	5	131
BCAP29	78.8224	0.367673	0.39508	0.930629	0.352046	0.575536	NOT	36	21	84	34	102	243	118	159
BCAP31	1698.08	1.37008	0.199664	6.86193	6.79381e-12	9.55581e-10	UP	409	613	671	605	4663	5561	3667	3211
BCAR1	782.577	0.45016	0.224626	2.00405	0.0450652	0.150287	NOT	466	219	546	410	1698	1962	1343	1283
BCAR3	121.535	0.180092	0.339394	0.530629	0.595676	0.778407	NOT	48	90	51	81	309	194	183	198
BCAS1	79.7133	-1.69757	0.363119	-4.67496	2.94013e-06	6.2658e-05	DOWN	76	80	67	69	97	46	74	39
BCAS2	138.165	-0.269218	0.288411	-0.933454	0.350586	0.57405	NOT	138	70	88	70	212	262	227	164
BCAS3	39.5433	-0.412803	0.458657	-0.900025	0.368107	0.589875	NOT	15	29	54	15	52	91	59	37
BCAS4	35.5261	0.215954	0.596522	0.362022	0.717335	0.855978	NOT	15	31	6	24	45	101	25	94
BCAT1	33.9137	-0.833785	0.548448	-1.52026	0.128445	0.307061	NOT	9	41	18	34	73	41	30	26
BCAT2	165.778	-0.458148	0.223401	-2.05078	0.0402881	0.138735	NOT	116	119	145	87	239	275	207	239
BCCIP	199.437	-0.557117	0.268185	-2.07736	0.0377686	0.132177	NOT	166	101	227	97	337	330	209	247
BCDIN3D	35.9303	0.51754	0.478509	1.08157	0.279445	0.501475	NOT	17	18	8	27	100	70	80	41
BCHE	85.5281	0.306006	0.331382	0.923421	0.355788	0.578716	NOT	59	53	34	36	155	215	111	174
BCKDHA	198.884	0.440331	0.407087	1.08166	0.279403	0.501475	NOT	94	23	164	146	340	556	326	373
BCKDHB	40.5628	-0.247091	0.422363	-0.585021	0.558533	0.751794	NOT	33	27	32	15	100	64	35	59
BCKDK	121.534	-0.759379	0.285419	-2.66058	0.00780064	0.0406506	NOT	89	80	129	78	150	217	88	175
BCL10	73.9567	-0.289875	0.4159	-0.696982	0.485814	0.695056	NOT	26	57	66	49	93	71	162	113
BCL11A	45.5537	0.323807	0.41197	0.785996	0.43187	0.648664	NOT	33	19	36	12	94	144	54	69
BCL11B	7.92715	-2.07065	1.04728	-1.97717	0.0480227	0.157251	DOWN	5	16	9	0	4	3	2	11
BCL2	35.8003	-1.06323	0.394105	-2.69784	0.00697913	0.0372734	NOT	39	19	28	32	43	63	33	25
BCL2A1	33.3953	-1.53339	0.434843	-3.52631	0.0004214	0.0039707	DOWN	27	28	37	29	19	31	46	20
BCL2L1	194.937	0.470634	0.226379	2.07896	0.037621	0.132043	NOT	84	101	102	108	407	468	282	407
BCL2L11	70.7364	0.146007	0.335089	0.435727	0.663035	0.822455	NOT	28	32	51	54	115	219	98	96
BCL2L12	49.9892	-0.276154	0.3114	-0.886812	0.37518	0.597091	NOT	42	27	34	30	91	90	70	62
BCL2L13	253.895	-0.138587	0.232713	-0.595528	0.551491	0.746384	NOT	149	101	214	194	480	552	359	302
BCL2L14	81.85	-1.15332	0.413022	-2.7924	0.00523189	0.0297942	NOT	77	34	51	112	118	69	101	58
BCL2L15	2052.86	-1.2074	0.393642	-3.06727	0.00216024	0.0148482	DOWN	2357	835	1540	2258	2199	944	2117	2883
BCL3	157.927	-0.627978	0.271321	-2.31452	0.0206392	0.0843948	NOT	123	65	169	120	240	195	221	190
BCL6	96.1331	0.00726667	0.280832	0.0258755	0.979357	0.991209	NOT	63	43	57	70	195	159	127	178
BCL6B	28.3293	0.389075	0.698636	0.556906	0.577592	0.765701	NOT	11	0	28	24	77	37	40	64
BCL7A	63.7513	-0.251131	0.457749	-0.548621	0.583265	0.76953	NOT	21	47	89	17	129	110	73	92
BCL7C	205.093	0.122942	0.25193	0.488	0.625549	0.798705	NOT	85	105	198	100	362	499	307	323
BCL9	96.1582	0.0218298	0.339383	0.064322	0.948714	0.975957	NOT	42	65	94	34	144	199	129	193
BCL9L	143.257	-0.326213	0.335331	-0.972809	0.330648	0.554437	NOT	54	104	147	87	225	297	116	249
BCLAF1	270.27	-0.230584	0.315592	-0.73064	0.464999	0.677701	NOT	300	126	170	112	502	572	354	315
BCO1	277.522	3.04145	0.45537	6.67908	2.40455e-11	2.79723e-09	UP	22	76	24	17	1022	1364	631	513
BCO2	85.028	0.0942131	0.346757	0.271698	0.785854	0.894222	NOT	61	44	42	51	107	224	185	94
BCOR	34.7548	-0.48315	0.560837	-0.861479	0.388974	0.609377	NOT	42	3	23	32	56	51	53	39
BCORL1	53.1989	0.910026	0.355259	2.56158	0.0104196	0.0504891	NOT	18	20	33	20	147	129	72	132
BCR	1090.57	0.581061	0.218002	2.66539	0.00768991	0.0401682	NOT	383	515	831	430	2524	2581	1936	1993
BCS1L	166.076	0.821211	0.282516	2.90678	0.00365172	0.0225637	NOT	41	73	113	69	308	458	355	340
BDH1	69.1761	0.00924446	0.390502	0.0236733	0.981113	0.991946	NOT	56	23	64	29	147	186	103	59
BDH2	269.165	-0.57401	0.304511	-1.88502	0.0594268	0.182087	NOT	216	81	301	210	347	545	342	282
BDKRB2	13.3578	0.91193	0.836721	1.08989	0.275764	0.497275	NOT	0	3	15	6	26	15	50	24
BDP1	111.178	0.146833	0.257943	0.569246	0.569189	0.759789	NOT	77	42	84	57	203	223	211	166
BECN1	157.825	-0.394682	0.276812	-1.42581	0.153923	0.346611	NOT	154	101	96	80	261	241	231	201
BEGAIN	2.57124	-0.141076	1.40632	-0.100316	0.920094	0.962847	NOT	2	4	0	0	5	2	4	5
BEND3	26.2576	-0.0173877	0.49309	-0.0352628	0.97187	0.987738	NOT	16	4	29	18	50	47	36	47
BEND5	21.616	1.27672	0.72703	1.75607	0.0790758	0.222245	NOT	4	16	3	6	30	65	18	94
BEND6	19.4147	-1.52807	0.609081	-2.50881	0.0121137	0.0567137	DOWN	7	30	16	15	28	24	9	10
BEND7	166.085	-0.0217271	0.227318	-0.0955803	0.923854	0.964824	NOT	80	101	134	94	287	323	301	223
BEST1	6.84587	-1.10502	0.947114	-1.16672	0.243322	0.461358	NOT	9	0	4	10	4	15	6	6
BEST4	78.7262	-0.854966	0.444053	-1.92537	0.0541834	0.170912	NOT	23	61	99	68	73	128	138	48
BET1	99.0521	-1.12593	0.281841	-3.9949	6.47223e-05	0.000842206	NOT	53	78	103	98	122	133	104	74
BET1L	193.26	0.329259	0.231622	1.42154	0.155161	0.348486	NOT	96	85	159	84	461	415	315	302
BEX1	13.415	0.0827065	0.683151	0.121066	0.903639	0.956626	NOT	5	3	7	17	24	43	10	22
BEX3	31.9404	-0.843947	0.463886	-1.8193	0.0688658	0.200606	NOT	26	16	45	16	33	38	27	57
BEX4	3.5137	1.39882	1.36653	1.02363	0.306011	0.530131	NOT	0	0	3	2	14	2	3	15
BFAR	144.284	0.416629	0.333884	1.24783	0.212095	0.424984	NOT	40	56	101	108	226	392	324	202
BGLAP	46.9726	-0.493373	0.625474	-0.788798	0.43023	0.647143	NOT	25	53	7	41	20	94	91	60
BGN	174.314	0.322906	0.460561	0.701115	0.483231	0.692851	NOT	99	65	98	116	531	322	67	426
BHLHA15	38.3428	0.0414276	0.569822	0.0727027	0.942043	0.973102	NOT	31	28	6	23	130	60	34	48
BHLHB9	16.6632	-0.44649	0.594072	-0.751575	0.452307	0.666658	NOT	18	14	4	9	24	38	21	16
BHLHE40	131.98	-0.669654	0.2584	-2.59154	0.00955476	0.0472455	NOT	127	86	97	82	150	210	187	152
BHLHE41	10.9803	-1.8674	0.791574	-2.35909	0.0183197	0.0772745	DOWN	16	4	2	19	7	8	10	7
BICC1	19.8999	-1.05581	0.511252	-2.06515	0.0389087	0.13528	NOT	29	11	14	11	24	25	23	17
BICD1	5.33066	5.13152	1.47002	3.49079	0.000481595	0.00441163	UP	0	0	0	0	8	15	8	39
BICD2	109.239	0.453484	0.277039	1.6369	0.101652	0.263399	NOT	53	38	58	76	188	253	191	233
BICDL1	11.5335	-0.0405182	1.03016	-0.039332	0.968626	0.986348	NOT	12	0	0	16	27	29	15	10
BICDL2	66.0296	0.546959	0.356417	1.53461	0.124881	0.301193	NOT	37	13	42	41	118	137	140	138
BICRA	47.0949	0.141493	0.441056	0.320805	0.748358	0.872927	NOT	19	9	45	40	98	98	92	55
BICRAL	46.2173	-0.581221	0.503264	-1.1549	0.248131	0.46663	NOT	44	38	47	6	51	74	68	60
BID	163.168	0.722505	0.241163	2.99592	0.00273622	0.0180224	NOT	64	73	77	84	410	339	364	277
BIN1	232.906	-0.242436	0.221859	-1.09275	0.274504	0.495718	NOT	164	134	164	151	470	349	284	361
BIN2	57.0512	-1.29042	0.364224	-3.54293	0.000395709	0.003778	DOWN	52	63	52	27	67	54	48	57
BIN3	103.363	0.21028	0.254913	0.824908	0.409424	0.628184	NOT	59	48	68	59	202	220	211	132
BIRC3	749.015	0.606517	0.218907	2.77066	0.00559436	0.031395	NOT	380	253	412	409	1530	1387	1719	1475
BIRC5	193.434	-0.299711	0.263493	-1.13746	0.255348	0.475458	NOT	179	94	135	112	356	426	225	216
BIRC6	151.387	-0.218364	0.355424	-0.614376	0.538967	0.737221	NOT	124	100	84	82	157	289	357	150
BIVM	74.1976	-0.438947	0.393573	-1.11529	0.264728	0.485523	NOT	67	18	57	69	100	165	109	69
BLCAP	278.189	0.86549	0.225942	3.83058	0.00012784	0.00147829	NOT	89	98	189	113	604	741	616	518
BLM	36.1167	0.337254	0.373719	0.902427	0.36683	0.588999	NOT	20	17	23	18	83	106	48	49
BLMH	172.01	0.106986	0.228559	0.46809	0.63972	0.807914	NOT	121	84	116	83	282	437	278	248
BLNK	135.726	-0.708082	0.344722	-2.05407	0.0399689	0.138005	NOT	130	74	125	84	177	205	247	81
BLOC1S1	287.759	0.805774	0.217524	3.70429	0.000211982	0.00226652	NOT	120	90	174	133	702	792	433	621
BLOC1S2	91.228	-0.528996	0.315627	-1.67602	0.0937352	0.248713	NOT	58	76	80	47	151	124	152	84
BLOC1S3	21.0825	-1.85636	0.643114	-2.88652	0.00389533	0.0236602	DOWN	20	19	33	10	28	24	12	2
BLOC1S4	51.4804	-0.179581	0.305744	-0.587355	0.556965	0.750641	NOT	31	22	45	37	95	93	76	70
BLOC1S5	11.7663	-1.82174	0.838234	-2.17331	0.0297571	0.11102	DOWN	15	4	10	16	8	16	13	0
BLOC1S6	23.436	-2.40265	0.620852	-3.86992	0.000108871	0.00129176	DOWN	29	34	14	15	15	4	19	11
BLVRA	107.863	0.158357	0.438697	0.36097	0.718122	0.856367	NOT	48	69	119	18	161	244	240	138
BLVRB	285.201	1.66616	0.232823	7.15633	8.28668e-13	1.64909e-10	UP	74	75	111	75	944	765	763	519
BLZF1	76.5069	-0.788846	0.332877	-2.36978	0.0177986	0.0756285	NOT	54	71	49	57	143	95	84	66
BMF	84.4213	0.0395287	0.276436	0.142994	0.886295	0.94809	NOT	37	61	57	46	157	180	121	134
BMI1	84.0701	-1.71822	0.360287	-4.76904	1.85108e-06	4.31975e-05	DOWN	59	106	99	47	82	76	41	72
BMP1	152.632	1.10809	0.337394	3.28425	0.00102254	0.0080595	NOT	70	40	103	29	336	355	326	400
BMP2	37.7658	-0.40545	0.617246	-0.65687	0.511264	0.716861	NOT	23	7	11	63	76	54	64	30
BMP2K	645.004	0.153321	0.25183	0.60883	0.542637	0.739919	NOT	294	471	407	295	935	1399	1049	1265
BMP3	10.2652	0.932956	0.918894	1.0153	0.309961	0.534691	NOT	2	0	15	2	14	38	13	30
BMP4	89.4646	-0.935756	0.296428	-3.15678	0.00159523	0.0115712	NOT	95	67	67	54	92	117	96	114
BMP5	18.9244	-1.58119	0.529593	-2.98567	0.00282954	0.0185111	DOWN	13	11	16	29	13	15	20	16
BMP6	4.44714	-0.746586	1.27734	-0.584483	0.558895	0.751993	NOT	1	5	8	0	9	9	6	0
BMP7	65.8442	0.525757	0.443518	1.18543	0.235849	0.452531	NOT	9	45	32	43	160	123	141	106
BMP8B	6.74904	0.351391	0.971089	0.361852	0.717462	0.856038	NOT	0	5	2	7	26	8	7	11
BMPER	11.8414	0.028602	0.715258	0.0399883	0.968102	0.985999	NOT	15	3	9	2	29	29	11	16
BMPR1A	96.8644	0.590007	0.300738	1.96186	0.0497783	0.161022	NOT	51	37	47	53	246	276	111	186
BMPR1B	10.2058	0.419663	0.743824	0.564196	0.572621	0.76205	NOT	4	4	3	10	12	43	10	19
BMPR2	22.1931	-2.08402	0.767786	-2.71432	0.00664119	0.0359275	DOWN	50	1	28	11	22	19	11	8
BMS1	99.8433	-0.497727	0.263021	-1.89235	0.0584444	0.179879	NOT	58	78	94	55	161	179	127	109
BMT2	29.066	-0.543397	0.552836	-0.982927	0.325643	0.549819	NOT	20	35	18	8	28	50	24	59
BMX	8.54022	-0.289489	0.78496	-0.368795	0.712281	0.853007	NOT	6	7	9	1	18	13	5	17
BNC2	17.5774	0.372883	0.692801	0.538226	0.590421	0.774766	NOT	7	8	22	2	30	54	11	45
BNIP1	72.1097	-0.557146	0.329756	-1.68957	0.0911096	0.244391	NOT	56	33	69	54	98	112	130	61
BNIP2	62.4569	-0.348863	0.323894	-1.07709	0.28144	0.503462	NOT	26	34	55	57	110	110	91	70
BNIP3	673.11	0.938276	0.182563	5.13947	2.75511e-07	8.34188e-06	NOT	260	260	315	287	1720	1466	1304	1549
BNIP3L	187.589	-0.482205	0.239096	-2.01678	0.0437181	0.146949	NOT	146	145	146	91	286	328	215	254
BOC	19.349	-0.106211	0.658679	-0.161248	0.871898	0.940502	NOT	23	12	10	3	24	46	13	46
BOD1	312.201	0.400933	0.250744	1.59898	0.109826	0.27738	NOT	133	108	172	245	643	694	576	534
BOD1L1	46.893	-0.879906	0.525054	-1.67584	0.0937694	0.248723	NOT	66	34	39	8	73	79	50	31
BOK	172.851	0.542899	0.524528	1.03503	0.300657	0.524603	NOT	103	35	55	148	257	465	92	595
BOLA1	91.4594	-1.03016	0.289906	-3.55341	0.000380274	0.00365895	NOT	96	55	65	81	89	130	86	109
BOLA2B	460.33	0.598183	0.229906	2.60186	0.00927205	0.046202	NOT	195	170	230	297	1196	1125	884	654
BOLA3	129.351	-0.326145	0.269464	-1.21035	0.226146	0.44119	NOT	56	89	104	101	228	212	147	203
BOP1	290.806	-0.143841	0.22274	-0.645779	0.518423	0.721836	NOT	203	135	260	156	487	503	382	520
BORA	93.8256	-0.176673	0.294221	-0.600478	0.548188	0.743932	NOT	72	32	76	66	155	204	150	106
BORCS5	55.2743	-0.971035	0.416709	-2.33025	0.0197931	0.0818166	NOT	45	17	90	35	60	69	57	70
BORCS6	63.8714	-0.186912	0.349362	-0.535009	0.592644	0.77654	NOT	36	37	29	61	93	142	105	75
BORCS7	143.13	-0.402398	0.255476	-1.57509	0.115236	0.285864	NOT	117	94	80	100	250	268	188	153
BORCS8	77.2751	0.120787	0.295552	0.408683	0.682772	0.83423	NOT	42	27	59	55	126	203	126	109
BPGM	38.6412	-0.0363146	0.351254	-0.103386	0.917657	0.961923	NOT	16	26	28	25	77	80	51	57
BPHL	289.448	0.0530637	0.319611	0.166026	0.868136	0.93902	NOT	212	106	272	119	642	585	561	263
BPI	299	1.89419	0.412312	4.59407	4.34686e-06	8.75711e-05	UP	118	44	40	102	1377	969	580	413
BPIFC	2.47376	2.29996	1.68374	1.36598	0.171944	0.373116	NOT	0	0	0	2	13	11	5	1
BPNT1	326.955	-1.10057	0.247061	-4.45463	8.40364e-06	0.000153689	NOT	323	190	318	262	330	457	423	229
BPTF	54.2593	-0.305719	0.311037	-0.982902	0.325656	0.549819	NOT	43	35	30	36	86	94	70	83
BRAF	79.7702	-0.871767	0.316484	-2.75454	0.00587746	0.0326755	NOT	56	68	75	51	69	97	114	100
BRAP	100.584	0.846982	0.391756	2.16201	0.0306171	0.113654	NOT	31	71	34	33	162	284	275	165
BRAT1	153.404	0.0287884	0.265864	0.108282	0.913772	0.960822	NOT	62	93	86	125	277	332	228	236
BRCA1	59.5884	-0.177068	0.361416	-0.48993	0.624184	0.798075	NOT	31	37	38	47	130	125	46	92
BRCA2	31.3303	0.715044	0.497703	1.43669	0.150807	0.341488	NOT	17	4	26	13	70	79	84	37
BRCC3	86.2306	0.20934	0.309291	0.676838	0.498509	0.706183	NOT	65	29	53	49	161	239	106	145
BRD1	143.996	0.192583	0.284724	0.676385	0.498796	0.706461	NOT	55	74	97	102	232	361	177	296
BRD2	584.194	-0.850969	0.214292	-3.97107	7.155e-05	0.000918691	NOT	493	286	642	443	720	836	758	558
BRD4	407.426	-0.165228	0.160106	-1.03199	0.302075	0.525962	NOT	236	235	333	250	700	816	550	597
BRD7	195.743	-0.791693	0.244093	-3.24341	0.00118107	0.00904184	NOT	109	157	188	150	277	226	260	213
BRD8	178.815	0.535047	0.262087	2.04149	0.0412026	0.140881	NOT	63	78	115	102	285	495	398	286
BRD9	238.533	0.265479	0.232323	1.14272	0.253156	0.472647	NOT	98	131	163	136	436	493	345	509
BRF1	527.475	0.143914	0.235645	0.610724	0.541382	0.739166	NOT	217	368	355	270	802	1223	929	864
BRF2	26.2628	-0.0592918	0.556345	-0.106574	0.915127	0.96116	NOT	25	10	27	5	61	67	35	21
BRI3	351.828	-0.41738	0.208865	-1.99833	0.0456808	0.151738	NOT	246	220	262	249	577	734	475	331
BRI3BP	319.638	0.672023	0.18625	3.60817	0.000308366	0.00309607	NOT	151	118	178	156	822	725	558	606
BRIP1	20.0382	-0.643661	0.545573	-1.17979	0.238084	0.455219	NOT	18	5	14	23	22	35	17	34
BRIX1	134.753	-0.131578	0.258874	-0.508271	0.611264	0.789379	NOT	92	69	97	86	292	304	144	168
BRK1	462.95	-0.21329	0.201756	-1.05717	0.290435	0.513555	NOT	291	303	312	295	871	810	520	757
BRMS1	163.837	-0.0105579	0.232528	-0.0454048	0.963785	0.983667	NOT	107	95	97	98	250	344	308	221
BRMS1L	29.7451	-0.186433	0.474156	-0.393188	0.69418	0.841441	NOT	23	27	9	15	58	47	47	38
BROX	145.537	-0.763185	0.289255	-2.63845	0.00832857	0.0427537	NOT	149	63	121	116	192	202	214	133
BRPF1	120.461	0.0762256	0.398062	0.191492	0.84814	0.92836	NOT	70	17	118	92	228	240	200	185
BRPF3	71.7051	-0.868891	0.352306	-2.4663	0.0136518	0.0621236	NOT	63	36	43	82	114	77	78	78
BRSK1	17.5882	-0.317602	0.623792	-0.509146	0.61065	0.789041	NOT	13	9	9	16	15	36	10	46
BRSK2	8.90012	0.54563	0.857653	0.636189	0.524653	0.726578	NOT	9	0	5	4	14	28	7	25
BRWD1	101.83	0.281872	0.344108	0.819139	0.412707	0.631094	NOT	31	55	101	42	185	257	206	130
BRWD3	42.6071	-0.0770958	0.420414	-0.183381	0.854499	0.931765	NOT	44	10	24	29	80	83	63	61
BSCL2	178.466	0.190835	0.201759	0.945853	0.344224	0.567906	NOT	92	94	126	95	385	363	267	299
BSDC1	23.1754	-2.07283	0.577996	-3.58623	0.000335494	0.00331255	DOWN	32	21	26	12	27	14	17	4
BSG	930.806	1.43663	0.180755	7.94797	1.89597e-15	7.33362e-13	UP	268	283	382	294	2955	2902	1814	1831
BSN	1.91466	1.82197	1.96324	0.928044	0.353384	0.576626	NOT	2	0	0	0	6	11	0	5
BSPRY	169.053	-0.148453	0.277691	-0.534599	0.592927	0.77678	NOT	119	63	172	90	297	284	217	301
BST1	107.097	1.77242	0.37348	4.74567	2.07816e-06	4.7564e-05	UP	16	36	17	46	299	369	251	232
BST2	234.918	1.20533	0.789762	1.5262	0.12696	0.304594	NOT	54	76	25	180	1296	432	170	412
BTAF1	146.975	0.880591	0.256183	3.43736	0.000587416	0.00516686	NOT	77	51	84	42	351	374	330	259
BTBD1	94.7189	-0.95996	0.236981	-4.05078	5.10468e-05	0.000700174	NOT	79	66	82	77	127	116	99	100
BTBD10	46.0153	-1.12975	0.446231	-2.53175	0.0113494	0.0539473	NOT	58	43	35	15	63	44	51	39
BTBD11	8.28951	5.01298	1.34795	3.71896	0.000200047	0.00216291	UP	1	0	0	0	52	13	37	8
BTBD18	2.78714	-0.423792	1.65592	-0.255926	0.798008	0.900896	NOT	0	0	9	0	1	4	8	3
BTBD19	47.7559	0.0579805	0.396554	0.146211	0.883755	0.946915	NOT	25	14	45	33	84	72	109	65
BTBD2	535.96	0.24186	0.173374	1.39502	0.16301	0.359767	NOT	318	247	387	253	1014	1341	826	867
BTBD3	280.671	-0.439314	0.174864	-2.51232	0.011994	0.0562335	NOT	200	148	232	211	435	481	374	356
BTBD6	546.206	0.920302	0.187715	4.90264	9.45557e-07	2.41414e-05	NOT	176	230	274	239	1377	1552	1103	943
BTBD7	157.766	-0.0314966	0.298786	-0.105415	0.916046	0.961473	NOT	85	103	126	75	272	479	204	163
BTBD9	45.7234	-0.529218	0.346386	-1.52783	0.126555	0.303905	NOT	34	29	40	29	67	91	36	68
BTC	34.0115	0.426045	0.714988	0.595878	0.551257	0.746197	NOT	24	26	5	12	39	70	13	139
BTD	132.614	0.584559	0.342456	1.70696	0.0878293	0.238654	NOT	45	60	112	47	306	334	325	141
BTF3	934.472	-0.965296	0.193377	-4.99179	5.98224e-07	1.6069e-05	NOT	893	669	813	625	1327	1250	808	1004
BTF3L4	110.055	0.293127	0.263496	1.11245	0.265944	0.486756	NOT	60	42	89	54	206	242	159	228
BTG1	334.067	-0.695466	0.258502	-2.69037	0.00713724	0.0378678	NOT	254	222	300	232	534	550	221	475
BTG2	146.134	0.538402	0.385178	1.3978	0.162172	0.358513	NOT	115	69	43	56	382	274	169	359
BTG3	104.637	-0.0631254	0.297701	-0.212043	0.832074	0.921347	NOT	63	52	53	90	165	239	123	184
BTK	25.1502	-0.00208599	0.610212	-0.00341847	0.997272	0.998595	NOT	5	8	17	32	57	37	58	20
BTN2A2	2.7207	0.218769	1.89922	0.115189	0.908295	0.958213	NOT	4	0	0	2	14	0	6	0
BTNL2	525.689	0.150565	0.319572	0.471144	0.637538	0.806342	NOT	260	288	407	266	640	1691	1109	475
BTNL9	7.96322	2.72453	1.16744	2.33376	0.0196082	0.0812257	UP	5	0	0	0	21	14	15	41
BTRC	87.6017	0.555643	0.317394	1.75064	0.0800078	0.224132	NOT	52	22	67	36	163	232	188	140
BUB1	63.9799	-0.181645	0.363797	-0.499303	0.617566	0.793989	NOT	31	39	36	58	112	176	78	62
BUB1B	56.3127	0.536617	0.38915	1.37895	0.167911	0.36692	NOT	31	18	48	18	117	174	118	62
BUB3	243.888	0.156062	0.337966	0.461769	0.644247	0.811247	NOT	187	58	137	184	439	467	542	310
BUD13	108.223	-0.624102	0.304359	-2.05055	0.0403109	0.138783	NOT	66	100	84	65	138	164	180	101
BUD23	135.693	-0.643336	0.233818	-2.75143	0.00593349	0.0329068	NOT	99	86	93	122	172	223	157	178
BUD31	101.025	-0.32347	0.293132	-1.10349	0.269813	0.490892	NOT	49	44	94	91	163	156	136	159
BYSL	105.29	-0.20817	0.272871	-0.762888	0.44553	0.660842	NOT	72	40	76	89	198	193	134	152
BZW1	711.857	-0.682541	0.190837	-3.57656	0.000348149	0.00340491	NOT	593	459	625	462	1097	871	915	846
BZW2	202.314	-0.318778	0.276868	-1.15137	0.249579	0.468002	NOT	193	112	127	111	410	401	241	213
C10H1orf106	249.039	0.892904	0.213613	4.18	2.91507e-05	0.000443916	NOT	94	84	136	114	588	682	583	391
C10H1orf115	2432.61	-1.52992	0.254031	-6.02258	1.71664e-09	1.02547e-07	DOWN	2578	2154	1654	2244	1999	1870	2182	2372
C10H1orf53	57.7728	1.26477	0.434674	2.9097	0.00361773	0.0224343	UP	25	5	30	25	132	214	147	82
C10H9orf153	3.16293	2.70087	1.60471	1.68309	0.0923583	0.246416	NOT	2	0	0	0	5	11	2	19
C10H9orf3	54.8443	-1.51275	0.347262	-4.35623	1.32321e-05	0.000226218	DOWN	51	54	47	43	37	65	60	34
C10H9orf64	61.9677	0.22952	0.445822	0.514826	0.606675	0.786728	NOT	64	12	34	30	78	168	119	99
C10H9orf72	67.1724	0.577659	0.386131	1.49602	0.134648	0.317138	NOT	46	19	21	44	169	187	124	85
C12H17orf100	49.1519	-0.061679	0.567867	-0.108615	0.913508	0.960764	NOT	10	58	38	13	61	60	115	82
C12H17orf105	2.63336	-0.0959543	1.41637	-0.0677465	0.945987	0.97465	NOT	0	1	4	2	5	6	7	0
C12H17orf49	32.8906	-0.872985	0.415423	-2.10144	0.0356027	0.127069	NOT	18	22	38	27	36	44	25	54
C12H17orf53	20.2204	0.116991	0.574378	0.203683	0.838601	0.924134	NOT	7	12	5	22	40	58	26	25
C12H17orf58	9.79981	-0.556674	0.948644	-0.58681	0.557331	0.751004	NOT	5	8	0	14	18	12	3	21
C12H17orf62	495.007	0.824891	0.286556	2.87864	0.00399397	0.0240915	NOT	98	237	308	232	1222	1331	913	928
C12H17orf75	24.0622	-1.55458	0.613731	-2.53301	0.0113089	0.0537712	DOWN	35	11	23	19	23	22	35	4
C12H17orf78	35.2848	0.310089	0.605949	0.511741	0.608832	0.788154	NOT	2	13	46	20	87	68	41	74
C12H17orf80	105.291	-0.334728	0.384989	-0.869447	0.384603	0.605451	NOT	51	72	127	42	87	192	180	173
C12H17orf97	5.91526	0.658455	1.08195	0.608583	0.542801	0.740061	NOT	3	0	0	8	13	11	13	12
C12H17orf98	6.03701	-0.00806339	1.14721	-0.0070287	0.994392	0.997775	NOT	3	0	3	9	27	12	1	4
C13H21orf2	99.7233	0.554915	0.297831	1.86319	0.0624362	0.188087	NOT	47	29	81	45	189	302	155	187
C13H21orf33	950.95	0.688783	0.159278	4.3244	1.52946e-05	0.000254176	NOT	425	345	570	449	1999	2491	1640	1985
C13H21orf59	110.188	0.619592	0.343488	1.80382	0.0712589	0.205809	NOT	28	37	74	76	187	275	181	272
C13H21orf91	64.2849	-0.534762	0.30734	-1.73997	0.0818644	0.227684	NOT	45	52	39	46	104	115	62	84
C13H3orf14	2.6181	1.05213	1.2831	0.81999	0.412222	0.630663	NOT	2	1	0	1	7	6	3	8
C13H3orf18	9.44749	0.707174	1.02423	0.690446	0.489913	0.698847	NOT	0	11	0	5	14	19	22	23
C13H3orf33	12.3165	0.792306	0.988614	0.801431	0.422882	0.640324	NOT	6	14	0	0	30	34	16	28
C13H3orf35	3.90715	1.56074	1.22496	1.27411	0.202623	0.412553	NOT	0	0	2	3	10	18	3	11
C13H3orf38	289.186	-0.0765304	0.209852	-0.364688	0.715345	0.854657	NOT	209	172	160	173	559	521	421	436
C13H3orf52	84.2514	0.425775	0.341281	1.24758	0.212186	0.424984	NOT	31	23	56	68	213	178	133	145
C13H3orf58	43.093	0.407506	0.541703	0.752268	0.45189	0.666378	NOT	40	21	6	20	96	117	37	94
C13H3orf62	2.7254	1.60775	1.51807	1.05908	0.289565	0.512369	NOT	0	3	0	0	8	12	6	3
C13H3orf67	13.773	-0.865628	0.665867	-1.3	0.1936	0.400727	NOT	14	6	14	10	17	26	23	3
C13H3orf70	74.2489	-0.462886	0.418504	-1.10605	0.268705	0.489856	NOT	54	27	106	32	91	132	65	142
C13H3orf80	2.41931	-0.300756	1.60248	-0.187681	0.851126	0.92966	NOT	0	0	4	3	4	4	0	7
C14H10orf10	57.2459	0.600311	0.397003	1.51211	0.130507	0.310408	NOT	31	22	45	15	104	180	66	134
C14H10orf107	4.78798	0.889706	1.40158	0.634789	0.525566	0.727266	NOT	8	0	0	0	21	15	5	4
C14H10orf128	16.1472	0.118669	0.713113	0.16641	0.867834	0.938974	NOT	3	21	9	3	29	21	38	24
C14H10orf35	3.63485	1.21452	1.26816	0.957696	0.338216	0.56204	NOT	0	3	0	2	3	15	7	10
C14H10orf62	4.68891	-3.1269	1.58731	-1.96993	0.048846	0.159339	DOWN	0	2	0	18	1	4	2	0
C14H10orf76	77.9405	0.298082	0.346171	0.861083	0.389192	0.609595	NOT	40	59	43	25	118	206	147	124
C14H10orf99	2.98274	-0.0916106	1.4178	-0.0646145	0.948481	0.975854	NOT	0	2	6	0	1	4	5	9
C14H12orf43	120.46	0.487264	0.307851	1.58279	0.113469	0.283023	NOT	71	27	74	76	239	307	177	252
C14H12orf49	141.678	0.0309073	0.315851	0.0978538	0.922048	0.96373	NOT	129	72	96	44	295	286	207	205
C14H12orf65	57.4477	0.581872	0.394937	1.47333	0.140663	0.326482	NOT	46	21	16	27	95	142	119	115
C14H1orf131	65.1344	-0.866298	0.287277	-3.01555	0.00256517	0.0170996	NOT	49	43	59	54	73	76	81	83
C14H1orf198	228.643	-0.74217	0.265795	-2.79227	0.00523402	0.0297942	NOT	179	158	223	140	280	353	176	369
C14H22orf39	139.339	0.336549	0.296088	1.13665	0.255683	0.475701	NOT	74	35	101	96	230	357	225	266
C15H2orf54	5.4945	1.57148	1.09093	1.44049	0.149729	0.339777	NOT	0	0	3	4	7	17	22	10
C15H2orf66	10.2966	1.87718	1.00991	1.85876	0.0630606	0.189341	NOT	0	0	3	8	25	58	28	7
C15H2orf72	49.4011	0.628343	0.359267	1.74896	0.080298	0.224619	NOT	24	25	26	19	133	119	107	58
C15H2orf76	31.4734	0.707204	0.530748	1.33247	0.182707	0.387344	NOT	18	5	16	20	87	73	87	24
C15H2orf88	16.7554	-0.193786	0.609258	-0.318069	0.750432	0.87397	NOT	13	10	16	5	23	39	9	38
C15H4orf47	5.3519	-1.67904	0.99427	-1.68872	0.0912735	0.244619	NOT	10	6	2	1	3	4	3	7
C16H5orf22	12.002	1.07749	0.604808	1.78154	0.0748244	0.213162	NOT	5	4	7	3	37	30	22	24
C16H5orf34	25.6364	-0.104483	0.458824	-0.227718	0.819865	0.914676	NOT	15	22	13	13	38	42	54	33
C16H5orf42	21.1329	0.546688	0.597547	0.914888	0.36025	0.582595	NOT	5	9	27	3	43	52	41	38
C16H5orf49	22.3934	-0.519778	0.610419	-0.85151	0.394486	0.614931	NOT	6	10	13	35	27	21	34	40
C16H5orf51	171.14	-0.87348	0.263242	-3.31816	0.000906133	0.00730954	NOT	134	126	117	156	217	329	173	136
C17H20orf194	40.8932	-0.710978	0.579031	-1.22788	0.219494	0.434371	NOT	11	58	29	21	41	70	21	81
C17H20orf196	6.52861	0.266211	1.09829	0.242386	0.808481	0.906665	NOT	9	0	6	0	6	17	8	18
C17H20orf24	68.6741	-1.5477	0.457538	-3.38267	0.000717849	0.00608245	DOWN	45	95	39	60	56	35	55	85
C17H20orf27	118.779	-0.491701	0.293066	-1.67778	0.0933892	0.24814	NOT	82	76	96	84	268	177	104	140
C17H20orf96	8.78019	-1.04934	0.963967	-1.08856	0.276346	0.497921	NOT	14	2	0	12	10	6	12	10
C17H8orf4	46.9258	-0.631249	0.450925	-1.3999	0.161544	0.357645	NOT	54	25	45	16	66	42	59	79
C18H7orf25	52.463	-0.170842	0.348945	-0.489595	0.62442	0.798168	NOT	33	38	22	39	74	110	75	81
C18H7orf49	34.1073	-0.203491	0.451415	-0.450786	0.652144	0.815225	NOT	11	23	27	28	51	92	55	27
C1D	62.4823	0.064284	0.363069	0.177057	0.859463	0.934349	NOT	40	29	41	39	173	96	62	110
C1GALT1	110.353	0.724059	0.34078	2.12471	0.033611	0.121502	NOT	44	52	65	42	402	206	202	144
C1GALT1C1	51.7855	0.396797	0.407076	0.974751	0.329684	0.553539	NOT	18	44	26	18	137	108	80	82
C1H14orf166	392.41	-0.0790403	0.186761	-0.423216	0.672138	0.827953	NOT	253	249	261	212	699	880	575	509
C1H14orf28	17.9096	0.0649431	0.536157	0.121127	0.90359	0.956626	NOT	7	16	12	7	40	45	18	26
C1H14orf37	2.45861	-0.252072	1.70055	-0.14823	0.882161	0.946194	NOT	0	0	4	3	1	4	0	10
C1H15orf41	36.9342	-0.225966	0.453418	-0.498362	0.618229	0.794521	NOT	32	9	18	38	67	77	51	43
C1H15orf48	502.306	-1.12263	0.240815	-4.66177	3.13497e-06	6.61722e-05	NOT	446	383	508	342	760	508	551	359
C1H15orf52	61.051	-0.354512	0.440534	-0.804733	0.420974	0.638748	NOT	69	28	31	37	49	115	72	128
C1H15orf57	92.7772	-0.655167	0.269454	-2.43146	0.0150381	0.0667393	NOT	56	57	93	73	105	144	141	104
C1H15orf61	15.2183	-0.564496	0.866558	-0.651423	0.514773	0.719279	NOT	5	26	11	0	16	27	12	29
C1H15orf62	30.1668	-0.263813	0.481372	-0.548044	0.583662	0.769791	NOT	11	15	46	12	51	62	37	42
C1H18orf25	81.7838	-0.257229	0.368732	-0.697604	0.485425	0.694644	NOT	27	58	49	80	111	158	95	148
C1H18orf32	140.336	-0.0922711	0.303303	-0.304221	0.76096	0.879851	NOT	53	84	78	134	258	286	199	199
C1H18orf54	12.2195	-0.229638	0.721204	-0.31841	0.750174	0.873798	NOT	15	5	7	5	22	27	26	4
C1H6orf120	115.568	0.269489	0.286387	0.940997	0.346707	0.570118	NOT	50	68	94	45	245	206	184	227
C1H6orf183	7.98169	0.604587	1.01474	0.595807	0.551304	0.746197	NOT	0	8	5	2	17	3	27	15
C1H6orf203	170.126	-0.183663	0.276505	-0.664231	0.506543	0.712489	NOT	105	117	119	96	253	255	360	209
C1H9orf152	8.50899	-1.0062	0.844884	-1.19093	0.23368	0.449968	NOT	6	7	10	5	18	19	4	1
C1H9orf16	9.03745	0.31846	0.89951	0.354037	0.723311	0.859265	NOT	7	1	13	0	22	23	10	16
C1H9orf40	95.3568	0.0551721	0.305052	0.180861	0.856476	0.933035	NOT	64	48	85	34	181	231	112	157
C1H9orf50	15.5829	0.308368	0.884772	0.348528	0.727443	0.861566	NOT	0	1	11	23	24	42	22	32
C1H9orf78	121.159	-1.34019	0.282439	-4.74506	2.0844e-06	4.76364e-05	DOWN	90	113	97	117	158	110	118	85
C1H9orf85	14.6334	-1.30093	0.778189	-1.67174	0.0945754	0.25026	NOT	20	0	14	18	21	20	8	11
C1QA	335.149	-0.928336	0.278571	-3.33249	0.000860713	0.00702371	NOT	283	269	265	242	571	271	346	378
C1QB	408.073	-0.678687	0.346047	-1.96126	0.0498491	0.161166	NOT	295	432	273	190	827	394	532	390
C1QBP	195.363	-0.882118	0.221085	-3.98996	6.60848e-05	0.00085781	NOT	182	119	172	145	296	247	186	219
C1QC	402.446	-0.94729	0.300821	-3.14902	0.00163822	0.0118331	NOT	326	395	292	251	661	359	338	512
C1QL1	5.40051	3.57825	1.4292	2.50366	0.0122915	0.0572815	UP	0	0	0	2	6	32	6	26
C1QL3	3.37358	-1.33013	1.35143	-0.984243	0.324996	0.549185	NOT	0	0	9	4	4	6	3	1
C1QL4	6.6965	1.54794	0.952093	1.62583	0.103987	0.267168	NOT	5	2	0	1	17	15	12	23
C1QTNF1	113.531	1.70949	0.463669	3.68687	0.000227025	0.00240125	UP	19	23	35	53	214	334	122	509
C1QTNF12	10.2606	0.85207	0.867279	0.982464	0.325871	0.549944	NOT	5	0	11	3	7	26	24	32
C1QTNF2	36.9606	0.832519	0.522523	1.59327	0.1111	0.27914	NOT	10	17	15	22	63	97	30	133
C1QTNF3	68.0299	0.630599	0.579069	1.08899	0.276159	0.497756	NOT	52	29	32	16	133	227	20	203
C1QTNF4	26.6077	-0.587289	0.685407	-0.856846	0.39153	0.612141	NOT	3	13	58	10	25	45	49	27
C1QTNF5	42.2902	0.339127	0.412688	0.821752	0.411218	0.629812	NOT	11	26	30	24	109	86	47	85
C1QTNF7	21.0737	-0.466118	0.786321	-0.592783	0.553326	0.74771	NOT	6	33	10	7	19	18	10	68
C1R	515.259	-0.0721429	0.219532	-0.328621	0.742443	0.869574	NOT	276	315	344	344	1081	762	696	888
C1RL	25.7732	1.83097	0.519273	3.52603	0.00042184	0.00397244	UP	7	4	10	7	72	111	72	31
C1S	225.225	-1.26514	0.35753	-3.53856	0.000402313	0.00383052	DOWN	197	200	115	242	273	219	116	297
C2	531.976	1.42648	0.296687	4.80802	1.52431e-06	3.66783e-05	UP	192	111	162	237	1972	1012	1247	1065
C2CD2	38.0356	0.164402	0.383476	0.428714	0.668132	0.825798	NOT	21	26	21	18	72	62	83	55
C2CD2L	137.262	0.672189	0.412056	1.6313	0.102826	0.265376	NOT	21	85	114	41	357	373	222	229
C2CD3	144.913	0.387241	0.279118	1.38737	0.165328	0.362727	NOT	79	60	104	66	338	234	215	328
C2CD4B	33.8554	1.6328	0.74441	2.19341	0.0282778	0.107104	UP	9	0	10	22	128	27	63	121
C2CD5	237.685	-0.362143	0.180909	-2.00179	0.0453071	0.150751	NOT	157	139	180	175	344	468	318	313
C2H11orf24	851.467	1.03914	0.268153	3.87517	0.000106551	0.00126715	NOT	193	379	470	320	1900	2566	1341	2137
C2H11orf49	25.702	0.525896	0.627999	0.837415	0.402359	0.622056	NOT	2	12	33	7	43	72	35	61
C2H11orf58	174.382	-1.05568	0.216516	-4.87577	1.08386e-06	2.73119e-05	NOT	157	121	164	132	249	199	162	171
C2H11orf68	91.7553	-0.276063	0.255418	-1.08083	0.279774	0.501932	NOT	55	51	81	60	159	197	100	126
C2H11orf74	4.05481	-1.02697	1.27058	-0.808269	0.418936	0.637139	NOT	0	6	4	3	5	12	3	0
C2H11orf84	52.2748	-0.24155	0.407752	-0.592393	0.553587	0.747848	NOT	54	22	27	34	103	117	41	77
C2H11orf86	1414.95	1.41796	0.253463	5.59433	2.21476e-08	9.20519e-07	UP	266	513	602	496	4225	4089	3511	2452
C2H11orf95	285.234	1.5025	0.269419	5.5768	2.44989e-08	1.00543e-06	UP	79	93	102	87	991	994	399	598
C2H11orf96	450.172	-0.25156	0.392356	-0.641153	0.521424	0.724089	NOT	371	313	201	277	573	849	269	1121
C2H11orf98	100.14	-0.573534	0.229693	-2.49696	0.0125263	0.058152	NOT	75	61	89	68	163	161	118	116
C2H19orf25	290.932	0.831173	0.205095	4.05262	5.06473e-05	0.000695928	NOT	96	108	174	137	716	805	578	494
C2H19orf38	2.2873	-1.40853	2.58659	-0.544551	0.586063	0.771642	NOT	0	0	0	8	9	0	0	0
C2H19orf43	523.273	-0.285936	0.162963	-1.75461	0.0793263	0.222747	NOT	341	320	446	299	917	932	692	719
C2H19orf44	10.3958	-1.08873	0.631899	-1.72294	0.0848991	0.233605	NOT	8	11	9	6	12	19	6	10
C2H19orf53	383.287	0.965744	0.224929	4.29354	1.75843e-05	0.000286083	NOT	124	125	224	168	1085	1167	705	608
C2H19orf57	4.40146	0.43144	1.43834	0.299957	0.76421	0.881528	NOT	0	0	0	9	4	6	10	13
C2H19orf60	138.709	0.895464	0.317786	2.81782	0.00483511	0.027945	NOT	45	36	58	98	285	459	259	261
C2H19orf66	254.954	-0.143686	0.265042	-0.542128	0.587731	0.772983	NOT	174	164	142	162	357	359	463	446
C2H19orf70	185.087	0.524025	0.226371	2.31489	0.0206188	0.0843877	NOT	95	88	90	94	469	478	309	271
C2H1orf35	577.394	-0.201867	0.233354	-0.865066	0.387002	0.607126	NOT	311	407	434	344	808	1055	1133	679
C2H5orf15	53.3485	0.909175	0.424503	2.14174	0.0322142	0.118025	NOT	8	22	38	24	159	167	71	96
C2H5orf24	137.529	-1.25847	0.256576	-4.90488	9.34841e-07	2.39072e-05	DOWN	124	110	157	84	167	157	97	140
C2H5orf30	118.745	-0.176927	0.322741	-0.548202	0.583554	0.769751	NOT	119	50	70	67	254	235	169	122
C2H5orf63	41.9602	0.273932	0.644872	0.424785	0.670993	0.82752	NOT	27	0	33	36	68	99	89	61
C3	16564.4	1.31129	0.244484	5.36349	8.1628e-08	2.91674e-06	UP	6756	3825	5177	7343	52928	39520	39587	30429
C3AR1	28.0518	-1.29745	0.605552	-2.14259	0.0321464	0.117876	DOWN	16	32	16	30	53	8	20	28
C3H16orf45	11.0679	0.276077	1.12491	0.245421	0.80613	0.906033	NOT	8	0	0	16	18	40	3	26
C3H16orf52	21.1978	0.449512	0.757495	0.593419	0.552901	0.747508	NOT	6	0	20	20	73	50	17	34
C3H16orf54	19.3598	1.57271	0.804055	1.95598	0.0504676	0.162505	NOT	0	13	7	3	81	39	63	16
C3H16orf58	26.8827	0.568429	0.47165	1.20519	0.228129	0.443977	NOT	12	17	13	10	72	80	26	49
C3H16orf59	80.1435	0.212599	0.465194	0.457011	0.647663	0.812526	NOT	41	8	59	78	157	190	108	144
C3H16orf62	86.609	-0.346027	0.279147	-1.23959	0.215128	0.429092	NOT	51	51	93	45	117	157	124	127
C3H16orf71	13.5417	-0.0953738	0.765444	-0.124599	0.900841	0.955233	NOT	3	3	5	23	35	22	23	11
C3H16orf72	133.076	-0.867471	0.274679	-3.15813	0.00158784	0.0115323	NOT	92	131	107	82	199	163	157	128
C3H16orf91	98.6998	0.0854012	0.349281	0.244506	0.806839	0.90642	NOT	30	57	53	91	188	241	162	120
C3H16orf96	5.43085	0.561214	0.978786	0.573377	0.566389	0.757536	NOT	6	0	4	1	9	11	15	9
C3H2orf40	10.7621	2.10812	1.04897	2.0097	0.0444628	0.14873	UP	1	8	0	0	39	36	9	37
C3H2orf42	22.7432	-0.885177	0.509034	-1.73893	0.0820465	0.228026	NOT	25	17	23	7	41	24	22	23
C3H2orf49	66.7507	0.475908	0.304584	1.56248	0.118174	0.290541	NOT	32	32	48	25	142	143	101	147
C3H2orf68	220.158	-0.178853	0.248562	-0.719549	0.471803	0.68388	NOT	129	120	226	105	347	506	334	259
C3H7orf26	160.049	0.45308	0.243217	1.86286	0.0624814	0.188103	NOT	72	60	123	80	348	442	225	283
C3H7orf43	139.557	0.806865	0.37325	2.16173	0.0306391	0.113708	NOT	73	17	73	89	291	327	309	287
C3H7orf50	67.3349	-0.855754	0.372095	-2.29983	0.0214581	0.087002	NOT	62	36	82	36	111	129	46	57
C4A	1251.94	0.682277	0.324535	2.10232	0.0355252	0.126884	NOT	751	363	345	849	3677	2835	2177	2023
C4BPA	1373.36	-0.41113	0.306534	-1.34122	0.179849	0.383536	NOT	1043	1045	631	998	2982	1947	2088	1141
C4BPB	305.587	2.19738	0.376349	5.83868	5.26147e-09	2.65164e-07	UP	73	34	60	100	1425	767	872	417
C4H1orf112	23.504	-0.231344	0.544236	-0.42508	0.670779	0.827417	NOT	25	10	23	5	50	55	25	24
C4H1orf162	6.87474	-1.30818	1.04248	-1.25487	0.209525	0.422395	NOT	0	10	11	3	12	8	7	1
C4H1orf194	2.44559	-2.34758	1.69018	-1.38895	0.164847	0.361987	NOT	0	5	5	0	1	4	1	0
C4H1orf226	25.5916	0.711739	0.587833	1.21079	0.225978	0.441134	NOT	21	11	6	8	40	51	92	30
C4H1orf43	109.637	0.140226	0.402708	0.348208	0.727684	0.861676	NOT	54	19	106	85	271	265	127	150
C4H1orf52	52.259	-0.393614	0.32178	-1.22324	0.221239	0.435937	NOT	49	25	33	37	86	90	67	69
C4H1orf54	9.0443	-0.156505	0.952274	-0.164349	0.869456	0.939336	NOT	9	0	1	13	19	23	8	11
C4H1orf56	4.75351	0.866953	1.66211	0.521597	0.601951	0.782655	NOT	8	0	0	0	10	12	0	20
C4H8orf33	209.033	-0.17617	0.22226	-0.792632	0.427992	0.644863	NOT	113	141	183	105	328	413	284	330
C4H8orf34	7.68838	-1.78213	1.18558	-1.50316	0.132797	0.314164	NOT	6	14	8	0	2	10	12	0
C4H8orf37	34.0439	-1.21718	0.462697	-2.63063	0.00852271	0.0434762	DOWN	19	24	44	31	21	61	19	43
C4H8orf59	131.572	0.777321	0.254199	3.05792	0.00222879	0.015218	NOT	60	54	60	61	376	325	194	260
C4H8orf76	38.6283	0.44547	0.582486	0.764774	0.444406	0.659973	NOT	23	11	47	3	87	88	90	44
C4H8orf82	38.3989	-0.0213035	0.408815	-0.0521104	0.958441	0.980734	NOT	30	16	28	21	77	107	32	56
C4H8orf89	11.4907	-0.740362	1.01354	-0.730472	0.465102	0.677722	NOT	1	11	25	0	16	19	4	21
C5	798.665	0.241728	0.261565	0.92416	0.355403	0.578577	NOT	496	297	379	602	1916	1716	1416	973
C5AR1	8.46126	-0.379814	1.22038	-0.311226	0.755629	0.876856	NOT	0	16	0	5	19	10	2	19
C5H12orf10	169.722	0.454396	0.332101	1.36825	0.171235	0.371837	NOT	81	31	149	101	332	404	307	312
C5H12orf29	46.6693	0.481913	0.365958	1.31685	0.187888	0.39412	NOT	16	22	43	16	99	116	79	84
C5H12orf4	88.7282	-0.0355114	0.293027	-0.121188	0.903542	0.956626	NOT	71	37	63	49	120	214	152	123
C5H12orf45	80.2529	-0.750867	0.309075	-2.4294	0.0151237	0.0669692	NOT	53	56	50	83	130	98	97	85
C5H12orf57	262.108	0.0762543	0.265159	0.287579	0.773669	0.886903	NOT	166	142	147	161	687	374	384	398
C5H12orf66	6.61793	0.112413	0.926987	0.121267	0.90348	0.956626	NOT	5	2	0	8	12	9	13	12
C5H12orf73	92.5198	-0.0884843	0.256322	-0.345208	0.729938	0.863359	NOT	67	47	69	50	133	201	153	133
C5H12orf75	57.6002	-0.675844	0.375702	-1.79888	0.0720371	0.207437	NOT	55	43	37	35	113	80	40	75
C5H22orf23	3.98647	-0.423008	1.25704	-0.336511	0.736486	0.866797	NOT	3	0	7	2	8	11	0	6
C6	240.382	-0.267792	0.338498	-0.791118	0.428875	0.645671	NOT	147	180	163	142	373	754	286	171
C6H16orf46	3.82954	0.968806	1.61428	0.600149	0.548407	0.743968	NOT	0	2	0	4	2	7	24	0
C6H16orf70	12.6365	-1.37549	0.819248	-1.67897	0.0931584	0.247807	NOT	11	15	1	15	25	10	4	10
C6H16orf74	14.2059	0.584878	0.560607	1.04329	0.296812	0.520607	NOT	5	7	11	5	26	38	20	34
C6H18orf21	86.7304	-0.596169	0.31484	-1.89356	0.0582834	0.179526	NOT	46	79	67	59	106	194	100	87
C6H18orf8	79.5613	-0.0165483	0.29411	-0.0562658	0.95513	0.979579	NOT	42	40	61	53	134	147	167	94
C6H19orf12	199.405	0.272913	0.424497	0.642907	0.520284	0.723061	NOT	31	137	211	70	362	519	300	341
C6H19orf33	167.497	0.133527	0.306351	0.435863	0.662936	0.822442	NOT	74	80	156	87	361	408	313	150
C6H19orf47	65.6239	-0.0389478	0.361566	-0.10772	0.914218	0.960988	NOT	34	29	81	24	125	141	92	94
C6H19orf54	159.083	0.0252404	0.249419	0.101197	0.919394	0.962628	NOT	88	59	127	116	286	397	216	228
C6H19orf68	5.11509	-0.384611	1.00075	-0.384321	0.700741	0.844974	NOT	0	3	3	8	9	6	5	10
C6H19orf81	39.5937	1.21224	0.421007	2.87937	0.00398471	0.0240638	UP	18	12	23	6	91	119	106	67
C6H19orf84	3.25183	-1.08408	1.38826	-0.780888	0.434868	0.650767	NOT	5	0	3	3	6	1	7	0
C6H1orf109	112.849	-0.123771	0.272758	-0.453777	0.64999	0.813973	NOT	76	42	89	83	171	192	170	203
C6H1orf122	32.3716	-0.0726386	0.510665	-0.142243	0.886888	0.948302	NOT	6	17	22	36	61	78	30	53
C6H1orf123	270.822	0.0079496	0.18759	0.0423776	0.966198	0.985108	NOT	165	153	175	162	574	528	389	390
C6H1orf168	24.5764	0.221902	0.558722	0.397159	0.69125	0.839339	NOT	15	15	16	9	52	64	59	11
C6H1orf174	44.329	0.277359	0.367151	0.755435	0.449988	0.664907	NOT	23	15	32	29	72	128	55	86
C6H1orf210	160.343	0.83599	0.273173	3.0603	0.00221117	0.015111	NOT	53	45	89	97	415	482	282	265
C6H1orf216	13.6117	-1.65598	0.90848	-1.8228	0.0683338	0.199483	NOT	26	2	19	5	10	9	1	24
C6H1orf228	20.6356	1.22044	0.840697	1.4517	0.146584	0.335397	NOT	2	18	9	0	69	37	70	20
C6H1orf50	194.334	0.258749	0.240397	1.07634	0.281774	0.503767	NOT	118	66	134	118	359	473	377	262
C7	113.381	-1.7371	0.419119	-4.14464	3.40354e-05	0.000504885	DOWN	98	170	97	46	72	109	61	116
C7H14orf1	311.946	1.234	0.226746	5.44221	5.26247e-08	1.97316e-06	UP	118	71	167	106	902	854	703	575
C7H14orf119	84.5128	-0.980084	0.287628	-3.40747	0.00065569	0.00564858	NOT	71	59	96	50	131	99	75	88
C7H14orf132	38.8283	0.160416	0.475828	0.33713	0.736019	0.866708	NOT	19	32	19	17	63	105	28	90
C7H14orf93	34.0598	-0.321947	0.468636	-0.686988	0.49209	0.700361	NOT	26	8	36	25	43	61	72	32
C7H15orf39	117.851	0.61316	0.311537	1.96818	0.0490474	0.159727	NOT	63	26	81	62	294	255	173	260
C7H15orf40	104.584	0.182385	0.251355	0.725607	0.46808	0.68014	NOT	49	57	59	72	221	214	155	177
C7H15orf59	11.7899	1.46802	1.0366	1.41619	0.15672	0.350706	NOT	1	8	6	0	25	38	2	54
C7H6orf106	1513.08	0.422355	0.147766	2.85826	0.00425971	0.0253096	NOT	746	687	888	828	3349	3307	2429	2858
C7H6orf125	281.224	0.691915	0.243495	2.8416	0.00448877	0.026287	NOT	95	122	214	102	683	705	537	484
C7H6orf132	256.558	0.465409	0.320499	1.45214	0.146463	0.335219	NOT	200	87	178	67	616	648	379	436
C7H6orf136	131.671	0.769539	0.369223	2.08421	0.0371409	0.130868	NOT	31	52	65	89	218	257	398	240
C7H6orf222	82.6001	0.573491	0.47823	1.1992	0.230452	0.446314	NOT	52	34	15	56	158	132	271	100
C7H6orf223	23.9777	0.640343	0.534756	1.19745	0.231132	0.446721	NOT	14	6	5	20	65	58	47	33
C7H6orf226	62.9865	-0.461853	0.331173	-1.3946	0.163136	0.359864	NOT	57	28	59	36	88	86	107	79
C7H6orf47	61.1603	0.220771	0.413585	0.533799	0.593481	0.77711	NOT	29	59	24	20	112	149	99	96
C7H6orf52	2.96341	2.09984	1.4613	1.43696	0.150729	0.341446	NOT	0	0	3	0	7	16	5	7
C7H6orf62	180.309	-1.37706	0.233517	-5.89704	3.70078e-09	1.915e-07	DOWN	189	142	170	131	181	248	152	122
C7H6orf89	245.588	0.808977	0.262146	3.08598	0.00202881	0.0140698	NOT	87	129	137	80	612	745	489	349
C8B	8.71484	0.539486	1.13017	0.477349	0.633114	0.803557	NOT	8	0	0	9	35	14	20	3
C8G	38.3624	1.0895	0.674431	1.61544	0.106215	0.271047	NOT	0	16	13	30	142	73	79	65
C8H4orf19	106.038	1.09915	0.381861	2.87839	0.00399712	0.0241011	NOT	44	15	41	66	365	255	206	179
C8H4orf22	3.88723	-0.270251	1.3006	-0.20779	0.835393	0.923031	NOT	5	0	6	0	5	2	4	12
C8H4orf32	65.1114	-1.36428	0.333022	-4.09668	4.19119e-05	0.000595465	DOWN	43	52	63	70	83	58	40	69
C8H4orf33	14.3913	0.790419	0.621802	1.27117	0.203667	0.414078	NOT	6	2	7	11	33	32	42	18
C8H4orf46	15.6041	-0.461347	0.612429	-0.753308	0.451265	0.666045	NOT	4	5	15	21	25	22	25	18
C8H4orf48	399.409	0.246857	0.415473	0.594158	0.552406	0.7471	NOT	67	263	420	159	802	654	553	927
C9	1256.09	1.51086	0.287904	5.24779	1.53938e-07	5.02476e-06	UP	415	366	428	374	3477	5082	3319	1332
C9H11orf1	31.517	-1.1925	0.638205	-1.86852	0.0616901	0.186456	NOT	10	18	77	10	19	64	25	29
C9H11orf52	56.5544	1.7155	0.478089	3.58825	0.000332904	0.00328908	UP	4	17	32	13	160	244	133	81
C9H11orf54	145.021	-0.461428	0.278014	-1.65973	0.0969686	0.255075	NOT	116	75	78	136	244	226	172	198
C9H11orf57	97.9567	-0.6021	0.274503	-2.19342	0.0282772	0.107104	NOT	80	48	94	69	145	124	113	148
C9H11orf65	5.85332	-0.183109	0.920235	-0.19898	0.842278	0.925746	NOT	5	0	8	3	7	8	10	12
C9H11orf70	3.71036	0.280294	1.41401	0.198226	0.842868	0.926124	NOT	4	0	0	4	1	8	2	16
C9H11orf97	2.27716	3.90969	1.66451	2.34886	0.0188312	0.0788514	UP	0	0	0	0	7	12	9	4
C9H1orf116	365.643	0.505211	0.288121	1.75347	0.079521	0.223213	NOT	179	140	288	144	1158	625	659	517
C9H1orf186	4.99121	-1.04034	1.40534	-0.740272	0.459135	0.672384	NOT	0	0	12	6	7	7	9	0
C9H1orf21	248.783	-0.483145	0.264847	-1.82424	0.0681156	0.199109	NOT	167	142	200	199	384	419	196	434
C9H1orf27	155.561	0.792804	0.276882	2.86333	0.0041922	0.0249756	NOT	65	45	112	62	312	471	359	234
C9H1orf74	31.0673	0.24983	0.4353	0.573926	0.566018	0.757366	NOT	11	10	29	21	44	67	66	54
CA10	4.07587	1.49921	1.30784	1.14632	0.251662	0.47054	NOT	4	1	0	0	14	9	2	16
CA11	47.7817	0.397784	0.500009	0.795553	0.426292	0.643472	NOT	20	38	18	21	73	114	37	147
CA12	93.7692	0.420118	0.914174	0.45956	0.645832	0.811659	NOT	8	69	72	46	31	166	101	403
CA14	11.5354	2.37158	0.854986	2.77383	0.00554009	0.0311696	UP	0	4	3	2	13	40	24	53
CA4	10.9594	-3.15787	1.10124	-2.86755	0.00413662	0.0246825	DOWN	6	0	4	38	2	9	2	3
CA5A	11.8283	0.188051	0.943176	0.199381	0.841965	0.925639	NOT	0	16	2	7	40	25	17	7
CA5B	3.52545	-0.657888	1.29307	-0.50878	0.610906	0.789241	NOT	0	0	4	7	6	9	3	2
CA7	57.8448	-6.60314	1.20965	-5.4587	4.79622e-08	1.81762e-06	DOWN	30	21	99	138	0	8	1	0
CA8	31.3692	-0.702592	0.575697	-1.22042	0.222306	0.436986	NOT	17	15	30	34	93	35	12	29
CA9	119.806	0.129867	0.347925	0.373261	0.708954	0.851416	NOT	65	90	73	46	219	151	272	194
CAAP1	40.1309	-0.171567	0.479459	-0.357835	0.720467	0.857754	NOT	33	9	42	23	88	72	28	75
CAB39	408.463	0.343366	0.217614	1.57787	0.114597	0.284804	NOT	256	155	242	227	1046	790	648	669
CAB39L	142.802	-0.349453	0.246455	-1.41792	0.156215	0.350149	NOT	100	75	139	81	264	201	196	199
CABIN1	220.365	-0.0554267	0.313593	-0.176747	0.859707	0.934349	NOT	117	99	221	123	394	469	179	459
CABLES1	28.7443	-1.08569	0.480452	-2.25972	0.0238387	0.0942486	NOT	30	27	17	19	42	54	16	20
CABLES2	71.7681	0.263044	0.368286	0.714239	0.475079	0.686243	NOT	22	47	68	24	144	161	135	102
CABP1	12.6486	-0.519498	0.589399	-0.881402	0.3781	0.60013	NOT	8	6	14	9	10	22	16	23
CABYR	5.91154	1.33656	1.09237	1.22354	0.221124	0.43586	NOT	6	0	0	2	12	10	14	20
CACHD1	39.9666	0.137843	0.462396	0.298107	0.765622	0.882392	NOT	11	34	18	27	104	59	71	52
CACNA1A	16.404	-0.140164	0.527689	-0.265617	0.790534	0.896711	NOT	11	10	14	7	32	18	26	29
CACNA1C	36.2484	-0.477321	0.482421	-0.989427	0.322454	0.546741	NOT	29	25	14	32	38	45	37	82
CACNA1D	8.47139	0.89753	0.777194	1.15483	0.248159	0.46663	NOT	1	6	3	4	14	15	24	20
CACNA1E	20.0827	0.120463	0.747122	0.161236	0.871907	0.940502	NOT	8	18	0	18	50	32	29	32
CACNA1F	3.14564	0.211367	1.66155	0.127211	0.898774	0.954156	NOT	0	0	0	7	6	2	1	13
CACNA1G	9.16636	-0.621217	1.07668	-0.576972	0.563958	0.756115	NOT	0	17	3	5	11	6	3	27
CACNA1H	336.433	-0.0511217	0.501405	-0.101957	0.918791	0.962324	NOT	215	244	145	207	258	560	179	1199
CACNA1I	4.96149	0.407144	1.48527	0.274122	0.783991	0.892842	NOT	0	0	12	0	17	2	4	15
CACNA2D1	61.1752	1.7742	0.393431	4.50957	6.49606e-06	0.000123321	UP	12	12	21	23	137	255	91	182
CACNA2D2	6.30907	1.0083	1.05293	0.957613	0.338258	0.56204	NOT	0	0	7	4	7	27	13	13
CACNA2D3	2.97841	1.49099	1.69076	0.881843	0.377862	0.599926	NOT	2	0	2	0	1	19	0	12
CACNB1	20.5175	-0.698573	0.536262	-1.30267	0.192687	0.399739	NOT	17	10	10	24	21	20	34	29
CACNB2	7.89836	0.93173	0.920676	1.01201	0.311535	0.535802	NOT	0	1	8	5	14	20	9	28
CACNB3	86.0359	0.239397	0.421346	0.568171	0.569919	0.760089	NOT	43	18	100	41	142	176	104	215
CACNG4	1.89665	3.64634	2.0954	1.74016	0.0818302	0.22763	NOT	0	0	0	0	10	9	0	8
CACTIN	123.78	-1.02775	0.328384	-3.12971	0.0017498	0.0125048	NOT	111	45	134	123	170	174	143	82
CACUL1	146.198	-0.271653	0.302211	-0.898886	0.368713	0.59047	NOT	132	50	94	115	251	300	218	156
CACYBP	266.24	-0.0491646	0.226379	-0.217178	0.828069	0.91947	NOT	213	112	201	139	531	544	367	378
CAD	28.9797	-0.450485	0.479855	-0.938795	0.347836	0.571227	NOT	11	15	44	15	45	46	29	49
CADM1	32.9628	-0.463233	0.476115	-0.972944	0.330581	0.554385	NOT	23	12	40	21	55	38	26	69
CADM2	4.79555	-1.52366	0.984272	-1.548	0.121622	0.296196	NOT	2	5	3	7	7	8	1	2
CADM3	46.9781	0.734562	0.586347	1.25278	0.210287	0.423365	NOT	30	4	41	15	93	105	37	165
CADM4	16.0861	1.19844	0.966714	1.2397	0.215085	0.429092	NOT	1	14	8	0	32	46	6	69
CADPS	19.3348	-0.19213	0.532488	-0.360816	0.718237	0.856393	NOT	15	12	14	9	34	30	14	45
CADPS2	26.5795	-0.129085	0.45903	-0.281213	0.778547	0.889833	NOT	24	13	21	10	66	38	34	37
CAGE1	5.87192	0.0198149	1.0303	0.0192322	0.984656	0.993129	NOT	0	4	10	1	5	19	11	7
CALCB	24.868	1.04127	0.618027	1.68483	0.092021	0.245856	NOT	4	15	19	2	44	50	64	66
CALCOCO1	68.4825	-1.7754	0.383855	-4.62519	3.7426e-06	7.72178e-05	DOWN	74	84	44	48	77	62	33	44
CALCOCO2	297.66	-1.49554	0.22535	-6.63651	3.21206e-11	3.52461e-09	DOWN	282	247	298	240	304	223	288	241
CALCRL	41.048	0.263702	0.526336	0.501015	0.616361	0.793504	NOT	39	9	26	18	109	77	26	98
CALD1	854.662	-0.9311	0.260974	-3.56779	0.000360002	0.00349871	NOT	788	593	702	635	1043	1183	543	1283
CALM1	3142.67	-0.244406	0.170097	-1.43687	0.150755	0.341456	NOT	1890	2029	2270	2071	4584	5232	4618	5174
CALM2	1409.69	-0.543571	0.158928	-3.42024	0.00062566	0.00546287	NOT	1009	821	1205	1054	2329	2216	1513	1873
CALM3	2882.54	-0.183599	0.178271	-1.02989	0.303061	0.526435	NOT	2255	1331	2213	1716	5398	5513	3912	3907
CALML4	770.862	-0.0176388	0.24588	-0.0717372	0.942811	0.973452	NOT	394	382	667	471	1255	1139	1690	1080
CALN1	10.9514	-0.546917	0.894025	-0.611747	0.540705	0.738571	NOT	8	13	10	0	6	11	13	28
CALR	2376.35	1.24315	0.184926	6.72245	1.78694e-11	2.24776e-09	UP	834	737	978	891	7895	6181	4701	4426
CALU	157.201	0.560005	0.315975	1.77231	0.0763434	0.216334	NOT	49	102	103	54	402	428	213	272
CALY	32.2462	0.864833	0.674506	1.28217	0.199782	0.408703	NOT	23	5	6	21	34	124	21	112
CAMK1	20.045	-0.229431	0.671469	-0.341684	0.732588	0.865024	NOT	18	6	6	22	46	37	7	39
CAMK1D	26.4301	-0.385491	0.478651	-0.805369	0.420607	0.638425	NOT	22	21	19	10	38	45	21	53
CAMK1G	6.75871	1.56489	0.990501	1.5799	0.114129	0.284166	NOT	0	5	2	1	7	18	22	20
CAMK2A	72.466	0.687231	0.534665	1.28535	0.19867	0.407345	NOT	47	29	18	38	86	161	56	296
CAMK2D	164.103	-0.183527	0.363809	-0.504459	0.613939	0.791176	NOT	69	52	134	178	319	411	182	182
CAMK2G	156.853	-0.646466	0.29583	-2.18526	0.0288697	0.108732	NOT	130	100	123	112	180	347	113	223
CAMK2N1	174.115	1.39344	0.383281	3.63556	0.000277375	0.00284103	UP	57	60	95	25	657	386	463	235
CAMK4	36.6167	-0.0475216	0.512069	-0.0928031	0.92606	0.965824	NOT	16	31	10	30	31	78	70	65
CAMKK1	42.6429	-0.126217	0.351083	-0.359508	0.719215	0.857168	NOT	29	29	33	17	67	73	74	64
CAMKK2	234.363	0.342143	0.353711	0.967296	0.333396	0.557665	NOT	147	66	145	151	360	544	230	660
CAMKMT	20.2372	-0.0304476	0.617635	-0.0492971	0.960683	0.981814	NOT	7	3	15	26	48	51	21	23
CAMKV	9.42957	1.3413	0.98425	1.36277	0.172956	0.373948	NOT	0	0	9	5	12	23	39	17
CAMLG	36.5079	0.272349	0.49933	0.54543	0.585458	0.771042	NOT	21	16	38	8	99	99	29	58
CAMSAP1	218.847	0.498767	0.255506	1.95208	0.050929	0.163621	NOT	81	88	165	115	358	572	351	487
CAMSAP2	92.1416	-0.854982	0.264716	-3.22981	0.0012387	0.00940855	NOT	79	68	86	56	97	158	110	91
CAMSAP3	533.965	-0.085319	0.263059	-0.324334	0.745685	0.871524	NOT	180	302	517	362	810	1102	887	774
CAMTA1	86.3377	-0.27963	0.262259	-1.06624	0.286317	0.508482	NOT	55	38	71	69	145	179	111	110
CAMTA2	338.405	-0.113381	0.19162	-0.591697	0.554054	0.748258	NOT	175	225	253	201	638	707	456	463
CAND1	182.631	-0.281864	0.303951	-0.927334	0.353753	0.576896	NOT	174	126	100	79	333	306	209	287
CAND2	35.016	0.387462	0.627154	0.617809	0.536701	0.735348	NOT	5	9	15	45	55	60	43	108
CANT1	324.272	1.27974	0.229197	5.58359	2.35606e-08	9.69492e-07	UP	112	109	159	84	980	970	549	706
CANX	1162.72	0.629287	0.245292	2.56546	0.0103038	0.0500692	NOT	603	619	442	512	3312	2383	1892	2153
CAP1	793.717	-0.428854	0.179762	-2.38567	0.0170479	0.0732681	NOT	666	468	606	475	1316	1251	1012	1075
CAP2	32.7126	-0.143065	0.48933	-0.292369	0.770004	0.884382	NOT	19	26	12	24	42	72	26	74
CAPG	162.049	-0.791344	0.335233	-2.36057	0.0182466	0.0770713	NOT	81	153	154	109	260	192	252	110
CAPN1	1072.01	0.0395536	0.1773	0.223089	0.823466	0.916719	NOT	675	569	766	569	2128	1998	1411	1936
CAPN10	193.46	0.459996	0.334511	1.37513	0.169092	0.368639	NOT	54	143	105	87	293	485	319	439
CAPN13	53.3205	0.0242339	0.629625	0.0384894	0.969297	0.986708	NOT	29	34	42	24	11	251	70	63
CAPN15	703.048	0.718286	0.178587	4.02205	5.76946e-05	0.000768863	NOT	297	296	452	261	1456	1842	1332	1408
CAPN2	280.243	-0.150596	0.276387	-0.544873	0.585841	0.771416	NOT	162	210	129	199	508	546	304	480
CAPN3	3.55942	-0.497974	1.21756	-0.408994	0.682544	0.834153	NOT	1	0	7	3	1	6	5	8
CAPN5	766.964	0.646676	0.21585	2.99595	0.00273595	0.0180224	NOT	308	352	514	294	1775	1850	1732	1109
CAPN7	32.4745	-1.04091	0.496352	-2.09711	0.0359836	0.128074	NOT	30	37	20	16	43	23	50	26
CAPN9	26.8477	-1.16556	0.687297	-1.69586	0.0899129	0.242484	NOT	18	36	3	28	31	53	26	9
CAPNS1	973.412	-0.56316	0.202311	-2.78363	0.00537545	0.0304513	NOT	837	554	650	769	1592	1476	1047	1305
CAPRIN1	596.372	-0.978087	0.169176	-5.78148	7.40456e-09	3.61399e-07	NOT	520	388	493	521	757	806	564	648
CAPRIN2	20.4771	-0.0723682	0.61341	-0.117977	0.906086	0.957464	NOT	8	16	24	4	31	47	47	14
CAPS	8.27811	-0.487648	1.31354	-0.371247	0.710454	0.851959	NOT	21	0	0	2	15	26	1	9
CAPZA1	267.899	-2.08911	0.337204	-6.19539	5.81405e-10	4.14539e-08	DOWN	294	256	247	247	193	95	247	142
CAPZA2	138.299	-1.88386	0.265321	-7.1003	1.24482e-12	2.32046e-10	DOWN	135	132	141	118	110	80	112	96
CAPZB	592.114	-0.445292	0.188157	-2.3666	0.0179524	0.0760807	NOT	430	364	423	438	750	1197	693	844
CARD10	263.721	0.945892	0.290634	3.25458	0.00113559	0.00874554	NOT	88	67	213	88	574	778	484	575
CARD11	74.4447	0.704457	0.376268	1.87222	0.0611758	0.1853	NOT	44	28	18	45	183	153	179	115
CARD14	88.3151	0.0106397	0.381729	0.0278723	0.977764	0.990158	NOT	45	43	56	70	118	137	245	95
CARD19	78.7988	0.10573	0.280403	0.377062	0.706127	0.849285	NOT	45	43	54	43	153	203	90	128
CARD6	112.794	-1.28031	0.322305	-3.97237	7.11603e-05	0.00091459	DOWN	92	58	183	71	135	135	83	105
CARD9	73.1535	0.0371569	0.429363	0.0865396	0.931037	0.968151	NOT	27	69	49	27	113	86	142	150
CARF	8.7683	0.278926	0.729734	0.38223	0.702291	0.846315	NOT	4	8	6	1	19	22	13	13
CARHSP1	394.978	0.878889	0.247509	3.55093	0.000383865	0.00369121	NOT	213	100	171	196	979	1255	690	675
CARM1	60.2944	-1.15008	0.433501	-2.653	0.00797799	0.041269	NOT	52	60	36	49	63	63	28	100
CARMIL1	106.628	-0.467749	0.300732	-1.55537	0.119859	0.293722	NOT	81	34	103	90	157	208	129	131
CARMIL2	69.9286	0.604327	0.368604	1.6395	0.101108	0.262431	NOT	26	25	48	38	147	107	201	111
CARMIL3	1.91363	3.65809	2.17096	1.68501	0.0919868	0.245849	NOT	0	0	0	0	2	13	0	12
CARNMT1	149.26	-0.114221	0.242378	-0.471251	0.637461	0.806311	NOT	98	89	98	91	284	358	163	205
CARNS1	8.23587	-0.104351	0.836519	-0.124744	0.900726	0.955177	NOT	0	6	8	7	14	21	6	15
CARS	278.908	0.463018	0.351981	1.31546	0.188354	0.394338	NOT	117	49	193	227	691	603	443	499
CARS2	308.46	0.656882	0.251869	2.60803	0.00910659	0.0456126	NOT	97	175	140	162	671	737	527	660
CARTPT	8.32302	1.33451	1.08716	1.22752	0.219628	0.434371	NOT	4	1	6	1	3	22	3	51
CASC1	49.3473	-1.93107	0.404062	-4.77916	1.76032e-06	4.14542e-05	DOWN	45	59	32	49	46	53	19	27
CASC3	233.524	0.257401	0.193095	1.33303	0.182523	0.387311	NOT	134	97	160	131	423	596	388	365
CASC4	61.3573	-0.326607	0.411437	-0.793819	0.427301	0.644303	NOT	60	49	37	17	127	112	69	72
CASD1	47.9229	0.523027	0.412919	1.26666	0.205278	0.416423	NOT	10	22	42	24	129	134	70	67
CASK	145.282	0.291882	0.308788	0.945249	0.344532	0.568158	NOT	120	67	77	52	309	335	288	178
CASKIN1	70.5425	0.57209	0.368669	1.55177	0.120717	0.29524	NOT	37	19	35	48	132	262	92	117
CASKIN2	124.877	0.529967	0.329405	1.60886	0.107647	0.273709	NOT	48	55	70	76	264	373	116	284
CASP1	495.946	-0.934599	0.210293	-4.44427	8.81905e-06	0.000159963	NOT	490	277	492	341	676	589	543	528
CASP10	295.348	1.35635	0.20932	6.47982	9.18322e-11	8.88951e-09	UP	121	97	101	82	821	794	654	653
CASP2	148.717	0.522826	0.299203	1.7474	0.0805688	0.225123	NOT	102	38	103	60	328	413	274	214
CASP3	450.491	-2.35614	0.482759	-4.88056	1.05785e-06	2.6779e-05	DOWN	700	323	286	496	252	62	385	254
CASP6	325.477	-0.898816	0.251003	-3.5809	0.000342418	0.00336171	NOT	362	177	282	214	484	402	307	372
CASP7	689.084	-1.52836	0.309732	-4.93446	8.03743e-07	2.08756e-05	DOWN	807	473	500	686	801	370	640	572
CASP8	75.8359	-1.577	0.424087	-3.71858	0.000200346	0.00216463	DOWN	60	31	95	97	87	37	83	49
CASP8AP2	39.6001	0.123615	0.400768	0.308445	0.757744	0.877531	NOT	28	11	38	18	66	100	73	50
CASP9	36.7744	-1.97483	0.420012	-4.70184	2.57823e-06	5.67431e-05	DOWN	31	22	66	29	37	27	18	22
CASQ1	9.01553	5.13848	1.24375	4.13146	3.60469e-05	0.000527706	UP	0	0	0	1	36	35	13	38
CASQ2	6.28727	2.01082	1.07144	1.87675	0.0605526	0.184146	NOT	2	0	0	4	15	13	11	28
CASS4	8.93188	0.712463	0.903058	0.788945	0.430144	0.647077	NOT	5	7	4	0	22	12	33	7
CAST	349.553	-0.247916	0.263631	-0.94039	0.347018	0.570387	NOT	313	187	263	162	652	481	586	456
CASTOR1	54.1502	0.372099	0.452306	0.822672	0.410695	0.629447	NOT	9	21	42	45	101	94	87	131
CASTOR2	240.271	1.26841	0.33992	3.7315	0.000190344	0.00207688	UP	85	47	72	139	442	912	403	619
CASZ1	130.943	0.0123693	0.251795	0.0491245	0.96082	0.98189	NOT	73	82	110	54	212	281	216	199
CAT	324.182	-0.95211	0.20271	-4.69691	2.64133e-06	5.75587e-05	NOT	274	254	262	242	435	384	392	303
CATSPER1	1.97853	2.81435	1.75502	1.6036	0.108803	0.275703	NOT	1	0	0	0	1	5	9	8
CATSPER2	98.4912	0.849544	0.402156	2.11247	0.0346459	0.1244	NOT	47	40	57	28	137	225	358	133
CATSPER4	4.30784	-2.6096	1.33582	-1.95356	0.0507535	0.163154	NOT	5	9	3	0	2	1	5	0
CATSPERE	3.32563	4.44907	1.60322	2.77509	0.00551862	0.0311053	UP	0	0	0	0	4	7	22	10
CATSPERG	33.9927	0.510078	0.461907	1.10429	0.269469	0.490728	NOT	20	23	17	7	54	76	55	86
CAV1	110.101	-0.29143	0.414464	-0.70315	0.481962	0.691637	NOT	102	50	47	92	175	246	64	209
CAV2	101.055	-0.523572	0.323698	-1.61747	0.105776	0.270186	NOT	87	42	71	91	146	161	89	174
CAVIN1	858.524	-0.632638	0.309131	-2.04651	0.0407066	0.139648	NOT	673	540	814	531	1112	1382	503	1636
CAVIN2	213.01	-0.973981	0.333548	-2.92006	0.00349961	0.0218242	NOT	211	128	158	187	193	329	124	345
CAVIN3	374.087	-0.0966936	0.427571	-0.226146	0.821088	0.915462	NOT	181	234	258	264	370	752	205	1127
CBFA2T2	41.7779	-0.0374741	0.586056	-0.0639428	0.949016	0.97608	NOT	37	23	43	2	79	112	56	46
CBFA2T3	50.2386	-0.0314019	0.381666	-0.0822758	0.934427	0.969454	NOT	16	39	39	29	102	87	58	94
CBFB	132.129	-0.633396	0.30529	-2.07473	0.0380113	0.132786	NOT	90	69	114	121	289	160	134	135
CBL	12.4304	-1.12601	0.670264	-1.67995	0.0929667	0.247485	NOT	17	6	13	6	22	11	16	5
CBLB	44.5082	-0.710787	0.422742	-1.68138	0.09269	0.247088	NOT	44	30	30	29	72	38	79	38
CBLC	132.375	0.691744	0.298244	2.31939	0.020374	0.0835703	NOT	72	62	53	56	198	369	330	226
CBLL1	86.4827	-0.383918	0.295629	-1.29865	0.194065	0.401199	NOT	55	33	83	72	116	143	137	118
CBLN2	13.5243	1.82239	0.963678	1.89107	0.0586146	0.180331	NOT	0	0	5	10	24	52	11	59
CBLN3	5.50327	-0.956977	1.17645	-0.813447	0.415962	0.634315	NOT	8	0	11	0	4	5	9	7
CBR2	2.89941	-1.62225	1.30898	-1.23932	0.215225	0.42923	NOT	1	1	4	5	0	5	1	4
CBR3	23.5075	-0.38542	0.615457	-0.626234	0.531161	0.73174	NOT	8	14	39	7	45	24	19	50
CBR4	49.1874	-0.186871	0.428205	-0.436406	0.662543	0.822254	NOT	17	51	36	21	81	126	61	57
CBS	8.68566	0.59601	0.923149	0.645627	0.518521	0.72184	NOT	2	6	0	8	32	26	8	9
CBX1	197.221	-0.869005	0.257612	-3.37331	0.000742693	0.00624169	NOT	207	120	156	136	271	295	155	248
CBX2	115.602	-0.202147	0.366374	-0.551749	0.58112	0.768207	NOT	42	54	163	56	231	205	145	165
CBX3	72.7155	-1.58096	0.306879	-5.15176	2.58052e-07	7.89047e-06	DOWN	72	51	69	73	68	49	60	69
CBX4	68.8203	0.584247	0.359164	1.62669	0.103804	0.266898	NOT	46	25	42	22	208	116	114	128
CBX5	314.181	-0.803271	0.236596	-3.39511	0.000686009	0.00586729	NOT	310	164	281	224	513	434	285	356
CBX6	365.231	0.628299	0.366996	1.71201	0.0868957	0.237242	NOT	182	166	167	177	436	937	389	1250
CBX7	90.2416	1.25226	0.314936	3.97625	7.00117e-05	0.000901932	UP	47	18	37	29	216	322	192	163
CBX8	59.5517	0.0934874	0.466078	0.200583	0.841025	0.92505	NOT	12	17	51	64	115	130	74	108
CBY1	60.7219	-0.436673	0.428132	-1.01995	0.307752	0.532373	NOT	35	36	20	75	87	94	70	101
CC2D1A	282.774	0.507769	0.203977	2.48935	0.0127977	0.0591064	NOT	130	114	159	167	593	825	457	456
CC2D1B	176.027	-0.0178743	0.26698	-0.06695	0.946621	0.974849	NOT	103	69	126	137	260	361	357	224
CC2D2A	31.5429	0.445144	0.455071	0.978185	0.327983	0.551882	NOT	27	7	20	12	54	98	55	49
CCAR1	670.074	-0.33067	0.201261	-1.64299	0.100385	0.261253	NOT	554	359	545	368	940	1191	1079	866
CCAR2	721.173	0.564407	0.194921	2.89556	0.00378477	0.0231363	NOT	257	304	487	384	1412	1802	1462	1260
CCBE1	28.218	-0.375014	0.473057	-0.792746	0.427926	0.644863	NOT	22	15	10	29	34	47	35	51
CCDC102A	41.9416	-0.291268	0.569707	-0.511258	0.60917	0.788289	NOT	32	19	51	14	71	88	12	93
CCDC102B	4.72232	-1.49038	1.35229	-1.10211	0.270413	0.491579	NOT	13	0	3	1	5	0	7	4
CCDC106	27.0208	-0.437299	0.518131	-0.843992	0.398674	0.618403	NOT	19	10	32	17	40	40	16	61
CCDC107	245.059	0.965464	0.334311	2.88792	0.00387796	0.0236	NOT	95	107	48	142	616	764	470	419
CCDC112	12.4501	-0.457881	0.648581	-0.705974	0.480205	0.690559	NOT	8	13	6	7	11	38	13	13
CCDC114	2.16817	0.683328	1.69053	0.404209	0.686059	0.836396	NOT	0	0	0	4	1	6	4	7
CCDC115	119.396	-0.308463	0.2571	-1.19978	0.230225	0.446147	NOT	93	74	82	71	177	281	132	160
CCDC117	158.371	-0.724649	0.221874	-3.26604	0.00109063	0.00849231	NOT	134	120	112	109	225	259	169	176
CCDC12	298.123	-0.102671	0.23474	-0.43738	0.661836	0.821824	NOT	143	193	234	182	551	581	539	319
CCDC120	648.486	0.961761	0.254902	3.77306	0.000161256	0.00180532	NOT	203	282	426	174	1658	1570	1223	1439
CCDC121	3.69259	-0.726724	1.48092	-0.490726	0.62362	0.797871	NOT	7	0	0	4	5	9	0	6
CCDC122	8.313	-1.81664	1.01094	-1.79699	0.0723379	0.207955	NOT	13	10	8	0	11	12	1	3
CCDC124	196.342	-0.111583	0.21682	-0.514635	0.606808	0.78677	NOT	117	96	152	135	355	405	330	222
CCDC125	118.571	-0.511725	0.331982	-1.54143	0.123213	0.299008	NOT	83	40	143	85	152	242	181	109
CCDC126	16.9851	0.965039	0.569283	1.69518	0.0900408	0.242668	NOT	5	9	10	4	39	39	23	52
CCDC127	128.981	0.599175	0.353038	1.6972	0.0896595	0.242054	NOT	30	55	124	49	268	271	287	235
CCDC13	4.66956	0.909285	1.49982	0.606262	0.544341	0.741116	NOT	0	7	0	0	3	3	12	20
CCDC130	98.3132	-0.0831463	0.451164	-0.184293	0.853784	0.931707	NOT	32	21	123	83	123	193	212	125
CCDC136	9.38019	0.801822	1.1665	0.687376	0.491846	0.70031	NOT	2	12	0	1	7	15	4	51
CCDC137	245.246	0.143684	0.322221	0.445917	0.655657	0.817853	NOT	70	97	252	167	437	601	320	437
CCDC138	26.5345	0.0831965	0.553368	0.150346	0.880492	0.945312	NOT	20	3	25	17	25	69	53	42
CCDC14	23.2747	1.64297	0.752154	2.18435	0.0289364	0.108957	UP	2	1	22	5	45	102	80	23
CCDC141	6.22393	-1.14242	1.0375	-1.10113	0.270841	0.492126	NOT	0	11	5	4	4	11	10	2
CCDC142	2.24409	1.35783	1.87841	0.72286	0.469766	0.681822	NOT	3	0	0	0	0	9	7	6
CCDC146	5.95486	-0.223351	1.28698	-0.173548	0.862221	0.935557	NOT	0	0	4	12	9	4	2	21
CCDC149	101.579	0.272483	0.315667	0.863197	0.388029	0.608266	NOT	54	25	71	78	185	214	166	198
CCDC15	19.76	0.166113	0.729339	0.227759	0.819834	0.914676	NOT	18	0	10	18	27	31	54	28
CCDC150	54.5987	0.0172662	0.32953	0.0523963	0.958213	0.980689	NOT	36	21	44	33	73	139	94	77
CCDC151	3.31288	-0.777637	1.37267	-0.566514	0.571044	0.760925	NOT	3	0	0	7	2	3	3	8
CCDC152	8.30726	-0.363995	1.118	-0.325576	0.744745	0.871018	NOT	0	7	2	13	10	40	2	4
CCDC157	7.50207	1.16022	0.95268	1.21785	0.223283	0.437905	NOT	5	0	7	0	18	25	14	16
CCDC159	17.7721	-0.189946	0.647404	-0.293397	0.769219	0.884136	NOT	14	17	5	8	12	24	40	33
CCDC160	4.23867	0.818002	1.25156	0.653587	0.513378	0.718432	NOT	3	0	5	0	4	12	3	18
CCDC166	4.66002	-1.34039	1.34509	-0.996507	0.319004	0.543272	NOT	0	12	3	0	5	5	1	7
CCDC167	157.603	1.24552	0.341294	3.6494	0.000262853	0.00272395	UP	85	48	39	52	531	537	276	229
CCDC170	9.63274	-0.58239	0.831428	-0.70047	0.483634	0.693043	NOT	9	6	14	0	14	14	7	18
CCDC173	2.16851	1.46133	1.83255	0.797428	0.425203	0.64258	NOT	1	0	2	0	3	0	2	15
CCDC174	91.0637	-0.385002	0.285818	-1.34702	0.177974	0.380912	NOT	82	45	78	48	147	131	122	139
CCDC18	28.1889	0.343166	0.506734	0.677211	0.498272	0.706029	NOT	9	9	31	14	37	73	73	35
CCDC183	11.8262	-1.88616	1.27349	-1.4811	0.13858	0.3232	NOT	0	36	0	4	2	8	12	11
CCDC184	4.35553	0.340398	1.37707	0.24719	0.804761	0.905114	NOT	1	2	0	6	4	11	0	18
CCDC186	203.343	0.0700909	0.246241	0.284643	0.775917	0.88814	NOT	146	93	154	94	424	421	364	237
CCDC187	4.42122	2.74935	1.28282	2.14321	0.032096	0.117731	UP	0	0	3	0	15	16	11	12
CCDC189	30.5737	-0.363385	0.512524	-0.70901	0.478318	0.688755	NOT	16	31	29	7	44	39	60	37
CCDC191	23.5401	-0.000501631	0.566306	-0.000885795	0.999293	0.99959	NOT	11	27	11	6	40	70	27	30
CCDC22	102.158	-0.185066	0.440843	-0.4198	0.674632	0.829636	NOT	24	83	121	41	126	143	182	189
CCDC24	42.7591	0.663521	0.41465	1.6002	0.109555	0.276921	NOT	31	11	29	11	89	96	73	101
CCDC25	184.388	0.122566	0.253456	0.483577	0.628686	0.801	NOT	125	65	121	122	330	330	367	283
CCDC28A	46.753	-0.411519	0.357781	-1.1502	0.250062	0.46863	NOT	18	36	41	35	77	99	56	50
CCDC28B	42.7994	0.0296525	0.453561	0.065377	0.947874	0.975366	NOT	13	16	49	29	67	101	40	93
CCDC30	86.5459	0.678129	0.460843	1.4715	0.141156	0.327168	NOT	18	18	56	74	121	214	249	141
CCDC34	437.973	-0.144418	0.267007	-0.540877	0.588593	0.773406	NOT	302	224	318	278	536	651	635	966
CCDC38	14.9198	1.1432	0.606183	1.8859	0.0593088	0.181888	NOT	4	2	7	10	49	30	33	29
CCDC40	3.93382	0.411342	1.64539	0.249997	0.80259	0.904221	NOT	8	0	0	0	1	2	6	19
CCDC42	5.32902	0.0249836	1.18189	0.0211386	0.983135	0.992534	NOT	10	0	3	0	7	8	6	15
CCDC43	95.8334	0.0451005	0.258645	0.174372	0.861573	0.935039	NOT	51	53	82	46	190	214	152	123
CCDC47	50.1556	-0.36689	0.421668	-0.870092	0.38425	0.605162	NOT	29	47	15	41	88	82	64	67
CCDC50	182.986	-0.524745	0.279839	-1.87517	0.0607695	0.184611	NOT	141	161	137	79	318	303	216	205
CCDC51	89.3392	0.768447	0.296954	2.58777	0.00966004	0.0476747	NOT	36	29	63	36	146	244	192	192
CCDC57	41.3248	-0.447377	0.383936	-1.16524	0.243923	0.462043	NOT	27	23	50	19	49	95	50	52
CCDC58	164.589	0.231666	0.224661	1.03118	0.302456	0.526153	NOT	83	87	118	82	326	350	327	223
CCDC59	48.8878	-0.532758	0.39678	-1.3427	0.179368	0.382732	NOT	25	22	73	27	84	90	52	55
CCDC6	232.612	0.06496	0.265773	0.244419	0.806906	0.90642	NOT	189	109	153	103	564	426	305	353
CCDC61	192.437	0.384317	0.241584	1.59082	0.111649	0.280247	NOT	79	108	111	106	332	497	402	278
CCDC62	33.2825	-0.269691	0.56164	-0.480185	0.631096	0.802393	NOT	24	7	11	46	62	59	58	30
CCDC65	11.2113	0.145497	1.06113	0.137116	0.890939	0.950008	NOT	0	13	0	11	13	21	34	11
CCDC66	42.6078	-0.136957	0.374487	-0.365721	0.714574	0.854404	NOT	22	16	41	32	58	75	84	60
CCDC68	62.3976	-0.38652	0.327997	-1.17843	0.238627	0.455695	NOT	40	50	38	41	94	81	107	83
CCDC69	149.47	0.86097	0.247367	3.48054	0.000500413	0.00454366	NOT	74	49	79	58	303	405	250	370
CCDC71	52.0746	-0.198411	0.367097	-0.540488	0.588861	0.77368	NOT	48	29	42	17	94	107	60	77
CCDC71L	55.803	-0.430413	0.364972	-1.1793	0.238277	0.45542	NOT	50	41	24	37	71	96	66	92
CCDC73	6.72012	-4.2384	1.63708	-2.589	0.00962538	0.0475491	DOWN	27	0	4	0	3	2	0	0
CCDC77	19.7919	-0.654199	0.47577	-1.37503	0.169122	0.368647	NOT	13	9	21	17	19	34	31	22
CCDC78	2.15149	0.965815	1.59646	0.604974	0.545196	0.74163	NOT	0	0	4	0	3	7	6	4
CCDC8	33.7867	-1.4761	0.402206	-3.67002	0.000242536	0.0025372	DOWN	34	19	28	40	29	41	20	34
CCDC80	112.859	-1.09929	0.40836	-2.69197	0.00710323	0.0377149	NOT	97	106	102	66	205	131	39	128
CCDC81	17.9833	-0.21847	0.769666	-0.283851	0.776525	0.888538	NOT	12	23	10	0	19	31	29	33
CCDC82	34.0175	0.167089	0.36927	0.452486	0.650919	0.81461	NOT	19	14	26	20	61	92	44	56
CCDC84	25.7615	0.357194	0.634074	0.563332	0.573209	0.762177	NOT	18	2	28	10	44	88	57	18
CCDC85A	13.0942	-0.445974	0.70562	-0.632032	0.527366	0.728862	NOT	2	11	7	16	12	26	11	27
CCDC85B	133.391	0.544901	0.260785	2.08946	0.0366662	0.129787	NOT	70	64	71	58	281	363	170	288
CCDC85C	285.422	0.924896	0.306525	3.01736	0.00254989	0.0170125	NOT	131	80	218	66	695	868	594	459
CCDC86	36.4221	-0.119247	0.390985	-0.30499	0.760374	0.879589	NOT	27	23	26	16	71	71	34	66
CCDC88A	40.2244	0.0416632	0.455435	0.0914801	0.927111	0.966285	NOT	13	32	38	14	65	109	39	74
CCDC88B	77.2757	1.25959	0.397952	3.16518	0.00154989	0.0113113	UP	28	18	20	44	263	164	210	111
CCDC88C	246.299	-0.125772	0.303755	-0.414056	0.678833	0.831874	NOT	100	90	277	181	336	522	381	387
CCDC89	10.0356	-1.75206	1.32585	-1.32146	0.186347	0.392587	NOT	18	0	0	19	14	11	8	0
CCDC9	398.089	-0.359524	0.255429	-1.40753	0.15927	0.35436	NOT	243	285	305	250	403	643	703	607
CCDC90B	52.8725	-1.02663	0.363702	-2.82272	0.00476184	0.0275834	NOT	49	23	47	55	62	48	61	64
CCDC91	47.53	-0.836194	0.393163	-2.12684	0.0334335	0.121115	NOT	43	27	63	19	57	55	56	64
CCDC92	37.4937	-0.118551	0.56799	-0.20872	0.834667	0.922628	NOT	31	4	40	24	55	80	25	89
CCDC93	68.7312	-0.363839	0.320462	-1.13536	0.256226	0.476342	NOT	46	26	66	54	122	102	113	76
CCDC94	117.697	0.400041	0.297168	1.34618	0.178246	0.381307	NOT	66	72	70	37	233	298	157	241
CCDC96	5.56454	0.769203	0.990538	0.776551	0.437424	0.65295	NOT	3	0	1	6	15	11	15	7
CCDC97	281.877	0.251147	0.239213	1.04989	0.293769	0.517108	NOT	146	122	237	133	664	708	352	432
CCER2	76.6189	-1.07547	0.401655	-2.67759	0.00741534	0.0389708	NOT	47	106	54	37	74	102	93	69
CCHCR1	198.956	-0.183646	0.237333	-0.773788	0.439056	0.654477	NOT	123	142	129	115	285	348	361	276
CCK	48.4906	2.26477	0.702529	3.22374	0.00126529	0.00956304	UP	4	5	3	28	228	48	171	90
CCL11	101.183	-2.70421	0.377901	-7.15588	8.31364e-13	1.64909e-10	DOWN	149	77	93	105	27	38	58	56
CCL14	56.8076	-0.423215	0.599103	-0.706414	0.479931	0.69023	NOT	63	25	49	23	135	48	15	131
CCL19	465.79	-2.33272	0.399904	-5.8332	5.43737e-09	2.72255e-07	DOWN	307	526	266	738	398	150	241	252
CCL2	282.319	-1.64756	0.313448	-5.25625	1.47025e-07	4.81943e-06	DOWN	301	184	225	326	233	165	203	311
CCL20	75.4679	2.42036	0.535442	4.52031	6.17497e-06	0.000118241	UP	9	3	32	17	357	125	246	137
CCL21	265.707	1.65542	0.470309	3.51986	0.000431771	0.00404625	UP	61	78	90	82	610	619	163	1318
CCL24	41.6299	-0.916897	0.527686	-1.73758	0.0822848	0.228525	NOT	33	9	63	34	83	38	24	54
CCL25	2430.23	1.30819	0.210658	6.21005	5.29672e-10	3.86561e-08	UP	662	685	1220	888	6218	8979	5084	4140
CCL26	45.3008	-0.955345	0.582436	-1.64026	0.100952	0.2622	NOT	22	25	63	40	18	89	17	90
CCL28	35.602	1.14784	0.482605	2.37842	0.0173871	0.0742722	NOT	23	11	16	4	117	80	65	76
CCL3L1	4.54451	-1.4501	3.26515	-0.444113	0.656961	0.818566	NOT	0	0	19	0	7	0	9	0
CCL4	3.02552	1.31954	1.37158	0.962058	0.33602	0.560348	NOT	0	2	0	2	17	5	3	5
CCL5	367.533	0.483564	0.356627	1.35594	0.175119	0.377044	NOT	107	186	183	264	1088	524	870	436
CCL8	39.3682	-3.30329	0.627927	-5.26062	1.43568e-07	4.72614e-06	DOWN	55	56	33	25	32	4	9	5
CCM2	196.159	0.1275	0.233391	0.546295	0.584863	0.770528	NOT	80	104	166	112	431	406	298	287
CCM2L	16.0761	0.676898	0.781656	0.865979	0.386502	0.606671	NOT	3	2	18	9	27	22	12	70
CCNA2	41.7044	-1.0068	0.466924	-2.15625	0.0310644	0.114955	NOT	56	25	39	16	72	42	27	50
CCNB1	81.2155	-0.618598	0.307724	-2.01024	0.0444058	0.148583	NOT	61	44	64	71	161	106	74	102
CCNB1IP1	116.353	-0.723729	0.318654	-2.27121	0.0231344	0.0920141	NOT	62	50	129	120	135	149	161	151
CCNB2	139.089	0.458649	0.277996	1.64984	0.0989752	0.258848	NOT	67	41	123	63	281	328	275	229
CCNB3	39.0278	0.0188611	0.423821	0.0445025	0.964504	0.983964	NOT	9	24	39	24	74	87	68	45
CCNC	221.182	0.0859333	0.22884	0.375516	0.707277	0.850073	NOT	142	102	155	126	458	444	419	255
CCND1	645.04	0.37473	0.233111	1.60752	0.107941	0.274094	NOT	262	284	505	338	1532	1267	863	1345
CCND2	23.7731	-0.749817	0.526166	-1.42506	0.15414	0.346888	NOT	28	14	16	14	48	21	36	16
CCND3	574.188	0.589198	0.217807	2.70514	0.00682754	0.0366409	NOT	280	203	344	299	1601	1148	1138	867
CCNDBP1	96.253	0.0661097	0.330869	0.199806	0.841632	0.925541	NOT	59	43	73	56	181	172	231	90
CCNE1	14.2882	0.597683	0.759818	0.786614	0.431508	0.648324	NOT	15	0	6	7	32	27	17	41
CCNE2	8.16608	-0.453746	0.995763	-0.455677	0.648622	0.813223	NOT	14	0	3	6	13	19	15	2
CCNF	162.465	0.0340162	0.351209	0.0968547	0.922842	0.964256	NOT	63	42	170	131	240	373	246	279
CCNG1	443.382	-1.69276	0.252074	-6.71534	1.87631e-11	2.33388e-09	DOWN	448	501	403	268	417	407	313	310
CCNG2	43.669	0.166374	0.378118	0.440005	0.659934	0.820576	NOT	23	13	26	39	88	110	61	65
CCNH	101.723	-0.00118473	0.302358	-0.00391829	0.996874	0.998487	NOT	52	54	98	48	133	224	204	139
CCNI	485.432	-0.424051	0.185949	-2.28048	0.0225794	0.0902843	NOT	330	347	356	311	821	849	527	677
CCNJ	46.6298	-0.0375203	0.386792	-0.0970038	0.922723	0.964256	NOT	34	31	16	31	100	104	56	62
CCNJL	36.1587	-0.284364	0.419171	-0.678395	0.497521	0.705365	NOT	39	18	28	12	68	64	47	47
CCNK	250.932	-0.0283303	0.219604	-0.129007	0.897352	0.953636	NOT	137	100	205	184	426	474	424	382
CCNL1	4.26826	4.81002	1.47447	3.26221	0.00110548	0.00857836	UP	0	0	0	0	7	11	25	13
CCNL2	548.691	0.2355	0.203342	1.15815	0.246803	0.465505	NOT	259	216	410	359	909	1214	935	1018
CCNT1	91.037	0.369679	0.30009	1.23189	0.217989	0.432512	NOT	31	43	78	45	193	252	128	149
CCNT2	103.925	0.899269	0.367035	2.45009	0.014282	0.0642173	NOT	20	31	78	53	255	365	188	153
CCNY	473.781	-0.084714	0.241054	-0.351431	0.725265	0.860331	NOT	291	312	344	235	872	877	495	921
CCNYL1	85.028	-1.12406	0.267693	-4.19905	2.68039e-05	0.000410603	NOT	84	62	76	61	112	95	72	89
CCP110	37.9944	-0.0497176	0.451798	-0.110044	0.912374	0.96029	NOT	39	13	27	16	93	92	42	39
CCPG1	47.8521	-0.231097	0.369351	-0.625684	0.531522	0.731842	NOT	45	16	42	25	84	96	74	53
CCR1	6.99401	-0.484807	1.14838	-0.422167	0.672903	0.828386	NOT	0	13	0	5	9	9	14	7
CCR10	13.1407	5.69475	1.31028	4.34622	1.38506e-05	0.000234975	UP	0	0	0	1	117	39	14	16
CCR2	3.57901	-1.93602	1.34292	-1.44165	0.149401	0.339334	NOT	7	0	3	4	4	1	5	0
CCR5	23.7748	-0.680664	0.538597	-1.26377	0.206311	0.417972	NOT	17	11	15	28	44	14	31	33
CCR6	3.52881	4.54077	1.48904	3.04946	0.00229257	0.0155573	UP	0	0	0	0	20	11	11	7
CCR7	3.40887	1.16797	1.46284	0.798421	0.424626	0.642148	NOT	5	0	0	0	11	6	12	3
CCR9	3.78339	-1.72931	1.41239	-1.22439	0.220807	0.435658	NOT	0	4	10	1	1	4	7	0
CCRL2	11.2654	2.03943	0.921919	2.21216	0.0269556	0.103411	UP	0	7	0	3	30	37	40	17
CCS	362.459	0.290293	0.265593	1.093	0.274394	0.495672	NOT	142	245	226	173	590	961	744	478
CCSAP	60.8718	0.5521	0.4883	1.13066	0.258199	0.478312	NOT	46	5	50	24	152	177	103	80
CCSER1	8.36022	-0.621918	0.96087	-0.647245	0.517474	0.721293	NOT	8	2	0	14	15	6	12	11
CCSER2	155.582	-0.726681	0.200207	-3.62965	0.000283811	0.002887	NOT	117	103	124	127	216	248	166	182
CCT2	420.496	-0.756031	0.246759	-3.06384	0.00218516	0.0149862	NOT	433	269	278	293	688	671	376	452
CCT3	350.635	-0.444754	0.23357	-1.90416	0.05689	0.176848	NOT	276	154	259	300	556	711	368	447
CCT4	425.78	-0.209254	0.166471	-1.257	0.208754	0.421397	NOT	268	243	340	265	732	868	516	631
CCT5	608.88	-0.063415	0.226741	-0.27968	0.779723	0.890796	NOT	465	228	464	376	1292	1260	823	785
CCT6A	455.863	0.312124	0.281481	1.10886	0.267489	0.488404	NOT	271	148	216	354	1156	964	594	794
CCT7	818.353	0.210939	0.207785	1.01518	0.31002	0.534691	NOT	575	336	488	450	1768	1580	1157	1532
CCT8	267.187	0.160564	0.187537	0.856168	0.391905	0.612493	NOT	152	141	148	169	540	581	418	414
CCZ1	99.1032	-0.770534	0.283631	-2.71668	0.00659408	0.0357713	NOT	59	69	111	69	102	181	133	94
CD1.1	4.73811	-0.672658	1.3296	-0.505912	0.612919	0.790586	NOT	1	8	0	4	4	9	0	12
CD101	17.6944	0.91719	0.697052	1.31581	0.188236	0.394312	NOT	8	12	7	2	47	19	66	21
CD109	10.8317	0.189762	0.635084	0.298798	0.765094	0.882081	NOT	4	8	4	8	18	24	14	23
CD14	24.5321	-0.0177629	0.595139	-0.0298467	0.976189	0.989819	NOT	5	13	15	27	83	37	29	22
CD151	456.344	1.38441	0.228425	6.06068	1.35551e-09	8.45665e-08	UP	100	156	210	153	1129	1577	859	1044
CD163	52.0404	-1.0622	0.518512	-2.04855	0.0405063	0.139177	NOT	41	70	15	36	57	70	78	27
CD164	245.825	0.390343	0.276183	1.41335	0.157553	0.351654	NOT	120	126	188	89	684	545	299	420
CD180	2.21048	2.08239	1.63315	1.27508	0.202281	0.411928	NOT	2	0	0	0	4	6	9	5
CD1D	34.9033	-1.36153	0.584149	-2.33079	0.0197642	0.0817187	DOWN	38	16	24	44	49	31	49	6
CD1E	6.71618	-1.64869	0.99877	-1.65072	0.0987948	0.258464	NOT	7	3	0	14	6	5	4	7
CD2	102.645	-1.07683	0.290486	-3.70701	0.000209719	0.00224862	NOT	87	81	76	91	132	100	134	83
CD200	245.292	-1.247	0.282439	-4.41511	1.0096e-05	0.000179546	DOWN	171	175	226	268	182	274	333	198
CD200R1	5.6089	-0.103609	1.05029	-0.0986479	0.921418	0.96345	NOT	0	7	6	1	13	4	12	7
CD200R1L	15.2268	0.132657	1.96924	0.0673644	0.946292	0.974769	NOT	0	30	0	1	14	22	68	1
CD209	77.4544	-1.24722	0.504536	-2.47202	0.0134352	0.0613909	DOWN	57	73	90	46	173	68	19	64
CD22	8.40495	-0.490017	1.09279	-0.44841	0.653857	0.816372	NOT	0	13	0	9	15	13	7	13
CD226	7.51965	-0.884245	1.27771	-0.692053	0.488904	0.697798	NOT	7	1	18	0	16	4	16	0
CD244	17.9222	0.747787	0.633628	1.18017	0.237934	0.454988	NOT	2	13	9	8	58	36	44	17
CD247	252.486	0.779338	0.416203	1.87249	0.0611385	0.185259	NOT	84	177	141	43	658	498	714	307
CD248	36.8326	0.712297	0.763928	0.932414	0.351123	0.57451	NOT	0	16	32	22	131	80	16	93
CD27	11.452	1.70559	0.925859	1.84217	0.0654505	0.193857	NOT	5	0	9	0	13	36	41	29
CD274	26.3235	0.637932	0.676226	0.943372	0.345491	0.569147	NOT	30	7	5	7	39	26	74	69
CD276	87.7611	0.761546	0.329097	2.31405	0.020665	0.0844725	NOT	46	24	53	38	275	256	126	126
CD2AP	415.426	-0.533794	0.203508	-2.62296	0.00871692	0.0441034	NOT	385	233	318	260	657	706	529	463
CD2BP2	236.463	0.0900196	0.207567	0.433689	0.664514	0.823233	NOT	126	138	145	145	377	463	438	387
CD300A	14.1718	-0.937564	0.677884	-1.38307	0.166642	0.365093	NOT	4	23	7	9	23	22	12	11
CD300C	12.5191	-0.232777	0.658452	-0.353522	0.723697	0.859328	NOT	11	12	7	2	24	17	15	22
CD300LF	21.9788	0.5016	0.596839	0.840428	0.400668	0.620366	NOT	3	13	20	9	42	27	65	37
CD300LG	9.09414	1.39179	1.0879	1.27933	0.20078	0.410158	NOT	1	10	0	0	23	15	23	26
CD302	12.6485	-0.845922	0.852364	-0.992443	0.320981	0.54514	NOT	3	22	11	2	17	25	19	3
CD320	41.4224	1.95814	0.484399	4.04241	5.29045e-05	0.000717387	UP	8	9	17	8	210	120	75	61
CD34	45.285	1.05784	0.474695	2.22846	0.02585	0.100339	NOT	12	16	38	8	138	84	71	124
CD36	51.2417	-0.332475	0.369222	-0.900475	0.367867	0.589875	NOT	46	20	31	42	108	80	54	72
CD37	44.5228	-0.335201	0.381062	-0.879648	0.37905	0.601011	NOT	23	43	34	19	73	70	57	69
CD38	52.8344	-0.59094	0.356321	-1.65845	0.0972271	0.255467	NOT	35	26	61	36	67	63	92	63
CD3D	11.3989	-2.13242	1.03423	-2.06184	0.0392233	0.136007	DOWN	2	19	25	0	10	2	8	8
CD3E	77.9946	0.23961	0.691463	0.346526	0.728948	0.862584	NOT	2	85	58	25	163	122	227	60
CD3EAP	94.0719	0.744364	0.288236	2.58248	0.00980917	0.0482107	NOT	32	32	64	46	220	190	177	216
CD3G	28.5628	-0.91233	0.525458	-1.73626	0.0825185	0.228927	NOT	9	26	31	25	38	31	51	15
CD4	41.42	0.650416	0.631647	1.02971	0.303144	0.52648	NOT	22	39	10	3	141	64	80	61
CD40	45.6999	-0.0750579	0.544798	-0.137772	0.890421	0.949982	NOT	22	51	13	22	49	64	125	57
CD44	125.861	0.604158	0.377755	1.59934	0.109745	0.277221	NOT	29	68	43	98	345	303	207	202
CD46	439.141	0.92324	0.250704	3.68259	0.000230878	0.00243335	NOT	146	213	140	223	1051	1094	937	869
CD47	336.273	0.161504	0.18386	0.878409	0.379722	0.601564	NOT	180	156	239	203	708	763	555	448
CD48	44.7465	-0.434071	0.390212	-1.1124	0.265967	0.486756	NOT	33	28	28	35	99	49	68	44
CD5	60.7955	1.01456	0.516337	1.96492	0.0494236	0.160311	NOT	8	37	39	14	158	117	205	71
CD52	156.949	1.02694	0.458202	2.24125	0.0250101	0.0977408	NOT	46	92	90	22	352	308	570	189
CD53	55.6807	-1.03801	0.377424	-2.75025	0.00595505	0.0330002	NOT	40	65	43	30	85	66	58	43
CD55	21.7072	0.647853	0.503762	1.28603	0.198432	0.407127	NOT	5	6	15	16	58	50	32	44
CD58	16.188	0.206053	0.837433	0.246053	0.805641	0.90575	NOT	11	0	27	2	39	25	29	26
CD59	129.671	0.69715	0.425574	1.63814	0.101392	0.262827	NOT	48	71	63	56	230	365	86	426
CD5L	23.1284	-3.02289	0.728029	-4.15215	3.29361e-05	0.000490933	DOWN	58	17	19	5	3	14	8	10
CD6	42.896	1.88216	0.675515	2.78626	0.00533207	0.03023	UP	0	23	11	9	110	100	179	65
CD63	496.12	1.12946	0.215055	5.25196	1.50489e-07	4.92256e-06	NOT	186	190	193	183	1398	1514	742	1106
CD68	29.6445	-0.615139	0.606286	-1.0146	0.310295	0.534812	NOT	42	20	5	17	68	39	33	23
CD69	3.44674	-1.45545	1.30288	-1.1171	0.26395	0.48469	NOT	0	5	3	4	7	3	3	0
CD7	5.29339	0.40452	1.11044	0.364287	0.715644	0.854882	NOT	4	0	8	0	6	11	14	10
CD72	14.3802	-0.675894	0.785513	-0.860449	0.389542	0.609957	NOT	3	14	2	22	15	13	18	27
CD74	4835.58	1.2498	0.29439	4.24539	2.18212e-05	0.000346987	UP	1733	2085	1673	1358	16167	7454	12532	9789
CD79A	7.843	0.641473	1.15963	0.55317	0.580147	0.767542	NOT	0	4	12	0	41	8	13	5
CD79B	13.9097	3.98378	1.02179	3.89882	9.66611e-05	0.00117205	UP	1	0	0	3	95	30	39	18
CD81	341.326	1.1937	0.302434	3.94697	7.91465e-05	0.00099822	NOT	133	119	73	169	852	1078	538	838
CD82	694.798	1.16691	0.211549	5.51602	3.46762e-08	1.35482e-06	NOT	184	223	406	248	1774	1920	1574	1371
CD83	15.8632	0.0885021	0.64828	0.136518	0.891411	0.950315	NOT	13	6	6	12	57	14	22	19
CD84	16.9231	1.53161	0.613246	2.49755	0.0125054	0.0581034	UP	5	3	12	2	58	34	39	41
CD86	148.044	-0.298246	0.268016	-1.11279	0.265797	0.486619	NOT	118	78	116	87	317	215	224	159
CD8A	43.6108	-0.989438	0.495602	-1.99644	0.0458864	0.152187	NOT	15	23	50	56	73	35	63	28
CD8B	16.4938	1.13601	0.786746	1.44394	0.148757	0.338466	NOT	2	9	9	5	41	9	77	20
CD9	165.178	0.415551	0.333896	1.24455	0.213296	0.426206	NOT	46	113	94	87	367	375	189	373
CD93	69.3085	1.04534	0.485885	2.15141	0.0314435	0.115942	NOT	44	23	10	30	166	159	77	233
CD96	19.1858	-0.501356	1.00906	-0.496857	0.61929	0.795189	NOT	1	32	20	0	21	15	54	14
[truncated: 13,473 more rows]
