# Supplementary material for: The Metabolic Pathway of Bile Secretion Is Vulnerable to Salmonella enterica Exposure in Porcine Intestinal Epithelial Cells
Source: Animals (Basel). 2024 Mar 3;14(5):789. doi: 10.3390/ani14050789 (PMC10931422; doi:10.3390/ani14050789)
Supplement: Supplementary file 1 [file animals-14-00789-s001.zip › Table S6. GO term enriched use up and DOWN-regulated genes between LPS treated and Control group.xlsx]

## Sheet: Up-regulated genes enriched
ID	Description	GeneRatio	BgRatio	pvalue	p.adjust	qvalue	geneID	Count	Ont
GO:0051049	regulation of transport	50/358	471/6899	6.43777e-07	6.43777e-07	0.00139869	ACVR1C/ANG/APOA1/APOA4/APOC3/ATP2A2/ATP2B1/BCAP31/BICD1/C3/CACNA2D1/CALR/CASQ1/CD84/CHGA/CNTN1/DERL3/EPHA3/FURIN/GHRL/GIP/GPER1/HPCA/HRC/HYAL2/KCNG1/KCNJ13/KCNQ5/LRAT/LRRC8A/MYOM1/P2RY2/PDX1/PPARG/RAB3B/RAB3C/RHBDD3/SARAF/SCN3B/SCT/SFTPD/SIDT2/SLC35F6/SPINK1/SSTR1/STIM1/SYT12/SYT13/SYT3/VPS18	50	BP
GO:0048878	chemical homeostasis	38/358	325/6899	1.6048e-06	1.6048e-06	0.00174332	APOA4/APOC3/AQP7/ATP1A2/ATP2A2/ATP2B1/ATP6V0A1/BCAP31/CASQ1/CLDN4/CYBRD1/EDN3/FRRS1/GPER1/HRC/HYAL2/LRRC8A/MET/MT-2B/PDX1/RAB38/RHAG/RHBG/SCT/SFTPD/SIDT2/SLC11A2/SLC31A2/SLC35G1/SLC37A4/SLC40A1/SLC8A3/SOAT1/STEAP3/STIM1/TSKU/UGCG/VDR	38	BP
GO:0033344	cholesterol efflux	8/358	20/6899	3.53575e-06	3.53575e-06	0.00256063	APOA1/APOA4/APOC3/APOE/PPARG/SCARB1/SOAT1/TSKU	8	BP
GO:0055080	cation homeostasis	25/358	190/6899	1.42093e-05	1.42093e-05	0.00618426	ATP1A2/ATP2A2/ATP2B1/ATP6V0A1/BCAP31/CASQ1/CYBRD1/EDN3/FRRS1/GPER1/HRC/HYAL2/MT-2B/RAB38/RHAG/RHBG/SLC11A2/SLC31A2/SLC35G1/SLC37A4/SLC40A1/SLC8A3/STEAP3/STIM1/VDR	25	BP
GO:0006638	neutral lipid metabolic process	11/358	47/6899	2.02777e-05	2.02777e-05	0.00618426	ABHD2/ANG/APOA4/APOC3/C3/GPAT3/MBOAT7/MFSD2A/PNLIPRP2/SLC37A4/SREBF1	11	BP
GO:0006639	acylglycerol metabolic process	11/358	47/6899	2.02777e-05	2.02777e-05	0.00618426	ABHD2/ANG/APOA4/APOC3/C3/GPAT3/MBOAT7/MFSD2A/PNLIPRP2/SLC37A4/SREBF1	11	BP
GO:0098771	inorganic ion homeostasis	25/358	194/6899	2.04583e-05	2.04583e-05	0.00618426	ATP1A2/ATP2A2/ATP2B1/ATP6V0A1/BCAP31/CASQ1/CYBRD1/EDN3/FRRS1/GPER1/HRC/HYAL2/MT-2B/RAB38/RHAG/RHBG/SLC11A2/SLC31A2/SLC35G1/SLC37A4/SLC40A1/SLC8A3/STEAP3/STIM1/VDR	25	BP
GO:0050801	ion homeostasis	25/358	196/6899	2.44359e-05	2.44359e-05	0.00618426	ATP1A2/ATP2A2/ATP2B1/ATP6V0A1/BCAP31/CASQ1/CYBRD1/EDN3/FRRS1/GPER1/HRC/HYAL2/MT-2B/RAB38/RHAG/RHBG/SLC11A2/SLC31A2/SLC35G1/SLC37A4/SLC40A1/SLC8A3/STEAP3/STIM1/VDR	25	BP
GO:0006811	ion transport	41/358	409/6899	2.9149e-05	2.9149e-05	0.00618426	ATOX1/ATP1A2/ATP1B3/ATP2A2/ATP2B1/CACNA2D1/CASQ1/CD84/CNTN1/GABRA4/GPER1/HPCA/HRC/KCNG1/KCNJ13/KCNK1/KCNK5/KCNQ5/LRRC8A/OSTM1/RHAG/RHBG/SARAF/SCN3B/SLC16A9/SLC30A10/SLC35G1/SLC37A2/SLC52A2/SLC5A10/SLC5A4/SLC5A8/SLC8A3/SLCO3A1/SPINK1/STEAP3/STIM1/SYT12/SYT13/SYT3/VDR	41	BP
GO:0030001	metal ion transport	28/358	236/6899	3.09088e-05	3.09088e-05	0.00618426	ATOX1/ATP1A2/ATP1B3/ATP2A2/ATP2B1/CASQ1/CD84/CNTN1/GPER1/HPCA/HRC/KCNG1/KCNJ13/KCNK1/KCNK5/KCNQ5/SARAF/SCN3B/SLC30A10/SLC35G1/SLC5A10/SLC5A4/SLC5A8/SLC8A3/SPINK1/STEAP3/STIM1/VDR	28	BP
GO:0006812	cation transport	33/358	301/6899	3.13108e-05	3.13108e-05	0.00618426	ATOX1/ATP1A2/ATP1B3/ATP2A2/ATP2B1/CASQ1/CD84/CNTN1/GPER1/HPCA/HRC/KCNG1/KCNJ13/KCNK1/KCNK5/KCNQ5/RHAG/RHBG/SARAF/SCN3B/SLC30A10/SLC35G1/SLC5A10/SLC5A4/SLC5A8/SLC8A3/SPINK1/STEAP3/STIM1/SYT12/SYT13/SYT3/VDR	33	BP
GO:0051046	regulation of secretion	23/358	178/6899	4.21565e-05	4.21565e-05	0.00763255	ACVR1C/ANG/ATP2A2/CD84/CHGA/GHRL/GIP/GPER1/LRRC8A/MYOM1/P2RY2/PDX1/PPARG/RAB3B/RAB3C/RHBDD3/SCT/SIDT2/SSTR1/SYT12/SYT13/SYT3/VPS18	23	BP
GO:1903530	regulation of secretion by cell	22/358	167/6899	4.59506e-05	4.59506e-05	0.00767952	ACVR1C/ANG/ATP2A2/CD84/CHGA/GHRL/GIP/GPER1/LRRC8A/MYOM1/PDX1/PPARG/RAB3B/RAB3C/RHBDD3/SCT/SIDT2/SSTR1/SYT12/SYT13/SYT3/VPS18	22	BP
GO:0055082	cellular chemical homeostasis	25/358	205/6899	5.2444e-05	5.2444e-05	0.00813867	ATP1A2/ATP2A2/ATP2B1/ATP6V0A1/BCAP31/CASQ1/CYBRD1/EDN3/FRRS1/GPER1/HRC/LRRC8A/MT-2B/PDX1/RAB38/RHAG/SCT/SIDT2/SLC31A2/SLC35G1/SLC37A4/SLC40A1/SLC8A3/STIM1/VDR	25	BP
GO:0140352	export from cell	29/358	258/6899	6.10498e-05	6.10498e-05	0.00884258	ACVR1C/ANG/ATP1A2/ATP2A2/CD84/CHGA/FURIN/GHRL/GIP/GPER1/LRRC8A/MYOM1/PDX1/PPARG/PTGDS/RAB3B/RAB3C/RHBDD3/SCAMP1/SCT/SIDT2/SLC35G1/SSTR1/SYT12/SYT13/SYT3/TYRO3/VIP/VPS18	29	BP
GO:0015850	organic hydroxy compound transport	14/358	83/6899	7.98711e-05	7.98711e-05	0.00991664	APOA1/APOA4/APOC3/APOE/AQP7/CHGA/FURIN/PPARG/SCARB1/SOAT1/SYT12/SYT13/SYT3/TSKU	14	BP
GO:0006641	triglyceride metabolic process	9/358	37/6899	8.40578e-05	8.40578e-05	0.00991664	APOA4/APOC3/C3/GPAT3/MBOAT7/MFSD2A/PNLIPRP2/SLC37A4/SREBF1	9	BP
GO:0030301	cholesterol transport	9/358	37/6899	8.40578e-05	8.40578e-05	0.00991664	APOA1/APOA4/APOC3/APOE/FURIN/PPARG/SCARB1/SOAT1/TSKU	9	BP
GO:0006873	cellular ion homeostasis	21/358	162/6899	8.67225e-05	8.67225e-05	0.00991664	ATP1A2/ATP2A2/ATP2B1/ATP6V0A1/BCAP31/CASQ1/CYBRD1/EDN3/FRRS1/GPER1/HRC/MT-2B/RAB38/RHAG/SLC31A2/SLC35G1/SLC37A4/SLC40A1/SLC8A3/STIM1/VDR	21	BP
GO:0032940	secretion by cell	27/358	238/6899	9.38864e-05	9.38864e-05	0.0099519	ACVR1C/ANG/ATP2A2/CD84/CHGA/FURIN/GHRL/GIP/GPER1/LRRC8A/MYOM1/PDX1/PPARG/PTGDS/RAB3B/RAB3C/RHBDD3/SCAMP1/SCT/SIDT2/SSTR1/SYT12/SYT13/SYT3/TYRO3/VIP/VPS18	27	BP
GO:0090207	regulation of triglyceride metabolic process	6/358	16/6899	9.6192e-05	9.6192e-05	0.0099519	APOA4/APOC3/C3/MBOAT7/MFSD2A/SREBF1	6	BP
GO:0015918	sterol transport	9/358	38/6899	0.00010518	0.00010518	0.0103872	APOA1/APOA4/APOC3/APOE/FURIN/PPARG/SCARB1/SOAT1/TSKU	9	BP
GO:0055065	metal ion homeostasis	21/358	166/6899	0.00012367	0.00012367	0.0108967	ATP1A2/ATP2A2/ATP2B1/BCAP31/CASQ1/CYBRD1/EDN3/FRRS1/GPER1/HRC/HYAL2/MT-2B/SLC11A2/SLC31A2/SLC35G1/SLC37A4/SLC40A1/SLC8A3/STEAP3/STIM1/VDR	21	BP
GO:0046903	secretion	29/358	269/6899	0.000129489	0.000129489	0.0108967	ACVR1C/ANG/ATP2A2/CD84/CHGA/FURIN/GHRL/GIP/GPER1/LRRC8A/MYOM1/P2RY2/PDX1/PPARG/PTGDS/RAB3B/RAB3C/RHBDD3/SCAMP1/SCT/SIDT2/SSTR1/SYT12/SYT13/SYT3/TYRO3/VDR/VIP/VPS18	29	BP
GO:0002474	antigen processing and presentation of peptide antigen via MHC class I	5/358	11/6899	0.000130401	0.000130401	0.0108967	CALR/MFSD6/TAP1/TAP2/TAPBP	5	BP
GO:0006957	complement activation, alternative pathway	5/358	11/6899	0.000130401	0.000130401	0.0108967	C3/C9/CFB/CFD/CFP	5	BP
GO:0042592	homeostatic process	45/358	497/6899	0.000141076	0.000141076	0.0113521	APOA4/APOC3/AQP7/ATP1A2/ATP2A2/ATP2B1/ATP6V0A1/BCAP31/CASQ1/CLDN4/CLDN5/CYBRD1/EDN3/FRRS1/GPER1/GPR55/HRC/HYAL2/ISG15/JAK3/LRRC8A/MET/MFSD2A/MT-2B/PDX1/PIK3CD/RAB38/RHAG/RHBG/SCT/SFTPD/SIDT2/SLC11A2/SLC31A2/SLC35G1/SLC37A4/SLC40A1/SLC8A3/SOAT1/STEAP3/STIM1/TSKU/TYRO3/UGCG/VDR	45	BP
GO:0030003	cellular cation homeostasis	20/358	158/6899	0.00017745	0.00017745	0.013769	ATP1A2/ATP2A2/ATP2B1/ATP6V0A1/BCAP31/CASQ1/CYBRD1/EDN3/FRRS1/GPER1/HRC/MT-2B/RAB38/SLC31A2/SLC35G1/SLC37A4/SLC40A1/SLC8A3/STIM1/VDR	20	BP
GO:0009306	protein secretion	15/358	101/6899	0.000198555	0.000198555	0.0148754	ACVR1C/ANG/CHGA/GHRL/GIP/GPER1/LRRC8A/MYOM1/PDX1/PPARG/RAB3B/RAB3C/RHBDD3/SIDT2/VIP	15	BP
GO:0019725	cellular homeostasis	26/358	237/6899	0.000218908	0.000218908	0.0155603	ATP1A2/ATP2A2/ATP2B1/ATP6V0A1/BCAP31/CASQ1/CYBRD1/EDN3/FRRS1/GPER1/HRC/LRRC8A/MT-2B/PDX1/RAB38/RHAG/SCT/SIDT2/SLC31A2/SLC35G1/SLC37A4/SLC40A1/SLC8A3/STIM1/TYRO3/VDR	26	BP
GO:0035592	establishment of protein localization to extracellular region	15/358	102/6899	0.00022202	0.00022202	0.0155603	ACVR1C/ANG/CHGA/GHRL/GIP/GPER1/LRRC8A/MYOM1/PDX1/PPARG/RAB3B/RAB3C/RHBDD3/SIDT2/VIP	15	BP
GO:0071692	protein localization to extracellular region	15/358	103/6899	0.000247847	0.000247847	0.0168275	ACVR1C/ANG/CHGA/GHRL/GIP/GPER1/LRRC8A/MYOM1/PDX1/PPARG/RAB3B/RAB3C/RHBDD3/SIDT2/VIP	15	BP
GO:0031638	zymogen activation	7/358	26/6899	0.000266413	0.000266413	0.0175399	CLEC3B/CTSZ/DHCR24/DMBT1/F12/FURIN/GGT1	7	BP
GO:0006875	cellular metal ion homeostasis	18/358	139/6899	0.000279729	0.000279729	0.017875	ATP1A2/ATP2A2/ATP2B1/BCAP31/CASQ1/CYBRD1/EDN3/FRRS1/GPER1/HRC/MT-2B/SLC31A2/SLC35G1/SLC37A4/SLC40A1/SLC8A3/STIM1/VDR	18	BP
GO:0050708	regulation of protein secretion	12/358	73/6899	0.000330006	0.000330006	0.0180953	ACVR1C/ANG/CHGA/GHRL/GIP/GPER1/LRRC8A/MYOM1/PDX1/PPARG/RHBDD3/SIDT2	12	BP
GO:0002115	store-operated calcium entry	5/358	13/6899	0.00033315	0.00033315	0.0180953	CASQ1/CD84/SARAF/SPINK1/STIM1	5	BP
GO:0046460	neutral lipid biosynthetic process	5/358	13/6899	0.00033315	0.00033315	0.0180953	ANG/C3/GPAT3/MFSD2A/SREBF1	5	BP
GO:0046463	acylglycerol biosynthetic process	5/358	13/6899	0.00033315	0.00033315	0.0180953	ANG/C3/GPAT3/MFSD2A/SREBF1	5	BP
GO:0071825	protein-lipid complex subunit organization	5/358	13/6899	0.00033315	0.00033315	0.0180953	APOA4/APOC3/APOE/MFSD2A/SOAT1	5	BP
GO:0071827	plasma lipoprotein particle organization	5/358	13/6899	0.00033315	0.00033315	0.0180953	APOA4/APOC3/APOE/MFSD2A/SOAT1	5	BP
GO:0097006	regulation of plasma lipoprotein particle levels	6/358	20/6899	0.000389983	0.000389983	0.0206656	APOA4/APOC3/APOE/MFSD2A/SCARB1/SOAT1	6	BP
GO:0010817	regulation of hormone levels	19/358	161/6899	0.00062924	0.00062924	0.0325502	ACVR1C/CHGA/CLCN2/CYP1A1/DIO1/FURIN/GHRL/GIP/GPER1/IYD/LRAT/LRRC8A/PDX1/RETSAT/SCT/SDR16C5/SIDT2/SSTR1/VIP	19	BP
GO:0006956	complement activation	7/358	30/6899	0.000688862	0.000688862	0.0344557	C2/C3/C9/CFB/CFD/CFP/MASP1	7	BP
GO:0090276	regulation of peptide hormone secretion	10/358	58/6899	0.000697795	0.000697795	0.0344557	ACVR1C/CHGA/GHRL/GIP/GPER1/LRRC8A/PDX1/SCT/SIDT2/SSTR1	10	BP
GO:0051223	regulation of protein transport	15/358	114/6899	0.000752022	0.000752022	0.0363082	ACVR1C/ANG/BCAP31/CHGA/DERL3/GHRL/GIP/GPER1/HYAL2/LRRC8A/MYOM1/PDX1/PPARG/RHBDD3/SIDT2	15	BP
GO:0002791	regulation of peptide secretion	10/358	59/6899	0.000802261	0.000802261	0.0370855	ACVR1C/CHGA/GHRL/GIP/GPER1/LRRC8A/PDX1/SCT/SIDT2/SSTR1	10	BP
GO:0090087	regulation of peptide transport	10/358	59/6899	0.000802261	0.000802261	0.0370855	ACVR1C/CHGA/GHRL/GIP/GPER1/LRRC8A/PDX1/SCT/SIDT2/SSTR1	10	BP
GO:0030072	peptide hormone secretion	11/358	72/6899	0.0010961	0.0010961	0.0496128	ACVR1C/CHGA/GHRL/GIP/GPER1/LRRC8A/PDX1/SCT/SIDT2/SSTR1/VIP	11	BP
GO:0044255	cellular lipid metabolic process	33/358	365/6899	0.00116531	0.00116531	0.0516692	ABHD2/ANG/APOA4/APOC3/B3GALT4/BCO1/C3/CDS2/CYP1A1/DPAGT1/ELOVL1/FADS3/GIP/GPAT3/LPGAT1/LRAT/MBOAT7/MFSD2A/MPDU1/PGAP3/PIGU/PIGV/PNLIPRP2/PPARG/PTGDS/PTGIS/RETSAT/SDR16C5/SLC37A4/SMPD3/SOAT1/SREBF1/UGCG	33	BP
GO:0002790	peptide secretion	11/358	73/6899	0.00123202	0.00123202	0.0535344	ACVR1C/CHGA/GHRL/GIP/GPER1/LRRC8A/PDX1/SCT/SIDT2/SSTR1/VIP	11	BP
GO:0048002	antigen processing and presentation of peptide antigen	5/358	17/6899	0.00134817	0.00134817	0.0574327	CALR/MFSD6/TAP1/TAP2/TAPBP	5	BP
GO:0070201	regulation of establishment of protein localization	15/358	121/6899	0.00140019	0.00140019	0.0585018	ACVR1C/ANG/BCAP31/CHGA/DERL3/GHRL/GIP/GPER1/HYAL2/LRRC8A/MYOM1/PDX1/PPARG/RHBDD3/SIDT2	15	BP
GO:0051050	positive regulation of transport	22/358	213/6899	0.00148436	0.00148436	0.0608485	ANG/APOA1/ATP2B1/BCAP31/BICD1/C3/CALR/CASQ1/CNTN1/GHRL/GPER1/HYAL2/LRAT/LRRC8A/MYOM1/P2RY2/PDX1/PPARG/SCN3B/SCT/SFTPD/STIM1	22	BP
GO:0006874	cellular calcium ion homeostasis	12/358	87/6899	0.00165509	0.00165509	0.0647546	ATP2A2/ATP2B1/BCAP31/CASQ1/EDN3/GPER1/HRC/SLC35G1/SLC37A4/SLC8A3/STIM1/VDR	12	BP
GO:0050796	regulation of insulin secretion	8/358	44/6899	0.00166458	0.00166458	0.0647546	ACVR1C/CHGA/GHRL/GIP/GPER1/LRRC8A/PDX1/SIDT2	8	BP
GO:0008610	lipid biosynthetic process	25/358	257/6899	0.00169817	0.00169817	0.0647546	ABHD2/ANG/APOA4/APOC3/B3GALT4/C3/CDS2/CLCN2/DHCR24/EBP/ELOVL1/FADS3/GIP/GPAT3/GPER1/MBOAT7/MFSD2A/PGAP3/PIGU/PIGV/PPARG/PTGDS/PTGIS/SREBF1/UGCG	25	BP
GO:0072503	cellular divalent inorganic cation homeostasis	13/358	99/6899	0.00170007	0.00170007	0.0647546	ATP2A2/ATP2B1/BCAP31/CASQ1/EDN3/GPER1/HRC/MT-2B/SLC35G1/SLC37A4/SLC8A3/STIM1/VDR	13	BP
GO:0034377	plasma lipoprotein particle assembly	4/358	11/6899	0.00175848	0.00175848	0.0647546	APOA4/APOE/MFSD2A/SOAT1	4	BP
GO:0065005	protein-lipid complex assembly	4/358	11/6899	0.00175848	0.00175848	0.0647546	APOA4/APOE/MFSD2A/SOAT1	4	BP
GO:0009101	glycoprotein biosynthetic process	15/358	124/6899	0.00179561	0.00179561	0.0650202	B3GALT4/B3GAT2/B3GNT8/B4GALT1/DERL3/DPAGT1/GALNT15/GCNT7/ITM2A/KRTCAP2/LOC100513844/MPDU1/PXYLP1/SOAT1/ST6GALNAC4	15	BP
GO:0098660	inorganic ion transmembrane transport	20/358	190/6899	0.00191943	0.00191943	0.0672616	ATP1A2/ATP2A2/CASQ1/GABRA4/GPER1/HPCA/HRC/KCNG1/KCNJ13/KCNK1/KCNK5/KCNQ5/LRRC8A/RHAG/RHBG/SCN3B/SLC35G1/SLC37A2/SLC8A3/STIM1	20	BP
GO:1901615	organic hydroxy compound metabolic process	20/358	190/6899	0.00191943	0.00191943	0.0672616	ADH4/APOA1/APOA4/CLCN2/CYP1A1/DHCR24/DIO1/EBP/GPER1/HAGHL/IYD/LRAT/MFSD12/PDXK/RETSAT/SDR16C5/SLC37A4/SOAT1/SREBF1/TSKU	20	BP
GO:0050878	regulation of body fluid levels	14/358	113/6899	0.00201339	0.00201339	0.0685175	AQP7/CLDN4/F10/F12/F7/HABP2/MET/P2RY2/PROC/SCT/THBD/TYRO3/UGCG/VDR	14	BP
GO:0010876	lipid localization	17/358	151/6899	0.00201835	0.00201835	0.0685175	ACVR1C/APOA1/APOA4/APOC3/APOE/C3/FURIN/LRAT/MFSD2A/PPARG/SCARB1/SIGMAR1/SLC5A8/SLCO3A1/SOAT1/TSKU/UGCG	17	BP
GO:0023061	signal release	16/358	139/6899	0.00215653	0.00215653	0.0720694	ACVR1C/ATP2A2/CHGA/GHRL/GIP/GPER1/LRRC8A/PDX1/SCT/SIDT2/SSTR1/SYT12/SYT13/SYT3/VIP/VPS18	16	BP
GO:0016485	protein processing	10/358	67/6899	0.00218976	0.00218976	0.0720694	CLEC3B/CPE/CTSZ/DHCR24/DMBT1/F12/FURIN/GGT1/MMP16/TLL2	10	BP
GO:0055074	calcium ion homeostasis	12/358	90/6899	0.00222249	0.00222249	0.0720694	ATP2A2/ATP2B1/BCAP31/CASQ1/EDN3/GPER1/HRC/SLC35G1/SLC37A4/SLC8A3/STIM1/VDR	12	BP
GO:0046486	glycerolipid metabolic process	16/358	140/6899	0.00232247	0.00232247	0.074204	ABHD2/ANG/APOA4/APOC3/C3/CDS2/GPAT3/LPGAT1/MBOAT7/MFSD2A/PGAP3/PIGU/PIGV/PNLIPRP2/SLC37A4/SREBF1	16	BP
GO:0009100	glycoprotein metabolic process	16/358	141/6899	0.00249893	0.00249893	0.0777049	B3GALT4/B3GAT2/B3GNT8/B4GALT1/DERL3/DPAGT1/GALNT15/GCNT7/ITM2A/KRTCAP2/LOC100513844/MAN1A2/MPDU1/PXYLP1/SOAT1/ST6GALNAC4	16	BP
GO:0019432	triglyceride biosynthetic process	4/358	12/6899	0.00253068	0.00253068	0.0777049	C3/GPAT3/MFSD2A/SREBF1	4	BP
GO:0050714	positive regulation of protein secretion	7/358	37/6899	0.00254702	0.00254702	0.0777049	ANG/GHRL/GPER1/LRRC8A/MYOM1/PDX1/PPARG	7	BP
GO:0006816	calcium ion transport	13/358	104/6899	0.00266078	0.00266078	0.0777049	ATP2A2/ATP2B1/CASQ1/CD84/GPER1/HPCA/HRC/SARAF/SLC35G1/SLC8A3/SPINK1/STIM1/VDR	13	BP
GO:0072507	divalent inorganic cation homeostasis	13/358	104/6899	0.00266078	0.00266078	0.0777049	ATP2A2/ATP2B1/BCAP31/CASQ1/EDN3/GPER1/HRC/MT-2B/SLC35G1/SLC37A4/SLC8A3/STIM1/VDR	13	BP
GO:0034308	primary alcohol metabolic process	6/358	28/6899	0.00266509	0.00266509	0.0777049	ADH4/CLCN2/CYP1A1/LRAT/RETSAT/SDR16C5	6	BP
GO:0010975	regulation of neuron projection development	12/358	92/6899	0.0026824	0.0026824	0.0777049	CNTN1/EFNA1/EPHA3/EPHB3/LPAR3/MFSD2A/NTN1/RETREG3/SEMA6A/SFRP2/TSKU/ZFYVE27	12	BP
GO:0015833	peptide transport	11/358	81/6899	0.0028973	0.0028973	0.0827252	ACVR1C/CHGA/GHRL/GIP/GPER1/LRRC8A/PDX1/SCT/SIDT2/SSTR1/VIP	11	BP
GO:0032371	regulation of sterol transport	5/358	20/6899	0.00296993	0.00296993	0.0827252	APOA1/APOA4/APOC3/FURIN/PPARG	5	BP
GO:0032374	regulation of cholesterol transport	5/358	20/6899	0.00296993	0.00296993	0.0827252	APOA1/APOA4/APOC3/FURIN/PPARG	5	BP
GO:0006633	fatty acid biosynthetic process	9/358	59/6899	0.00309529	0.00309529	0.0851256	ABHD2/APOA4/APOC3/ELOVL1/FADS3/GIP/PPARG/PTGDS/PTGIS	9	BP
GO:0043269	regulation of ion transport	18/358	171/6899	0.00318346	0.00318346	0.0856966	ATP2B1/CACNA2D1/CASQ1/CD84/CNTN1/GPER1/HPCA/HRC/KCNG1/KCNJ13/KCNQ5/SARAF/SCN3B/SPINK1/STIM1/SYT12/SYT13/SYT3	18	BP
GO:0040013	negative regulation of locomotion	11/358	82/6899	0.00319494	0.00319494	0.0856966	ABHD2/ACVR1C/CALR/CCL25/CLDN5/GPER1/HYAL2/SEMA6A/SFRP2/SPINT2/WNT11	11	BP
GO:0046890	regulation of lipid biosynthetic process	9/358	60/6899	0.00347929	0.00347929	0.0913514	APOA4/APOC3/C3/CLCN2/GIP/GPER1/MFSD2A/PPARG/SREBF1	9	BP
GO:0000902	cell morphogenesis	25/358	271/6899	0.00348986	0.00348986	0.0913514	BSG/CALR/CCK/CDH24/CLDN4/CNTN1/EFNA1/EPHA3/EPHB3/LPAR3/MET/MFSD2A/NTN1/RHOD/SEMA4F/SEMA6A/SIDT2/SPINT2/ST14/SYT3/TSKU/TYRO3/UCHL1/VDR/ZFYVE27	25	BP
GO:0006869	lipid transport	15/358	133/6899	0.00357763	0.00357763	0.0925341	APOA1/APOA4/APOC3/APOE/FURIN/LRAT/MFSD2A/PPARG/SCARB1/SIGMAR1/SLC5A8/SLCO3A1/SOAT1/TSKU/UGCG	15	BP
GO:0000904	cell morphogenesis involved in differentiation	19/358	187/6899	0.00368282	0.00368282	0.0941342	BSG/CALR/CCK/CNTN1/EFNA1/EPHA3/EPHB3/LPAR3/MET/MFSD2A/NTN1/SEMA4F/SEMA6A/SPINT2/ST14/TSKU/TYRO3/UCHL1/ZFYVE27	19	BP
GO:0007409	axonogenesis	13/358	110/6899	0.00435815	0.00435815	0.108856	BSG/CCK/CNTN1/EFNA1/EPHA3/EPHB3/LPAR3/NTN1/SEMA4F/SEMA6A/TSKU/UCHL1/ZFYVE27	13	BP
GO:0051222	positive regulation of protein transport	9/358	62/6899	0.004359	0.004359	0.108856	ANG/BCAP31/GHRL/GPER1/HYAL2/LRRC8A/MYOM1/PDX1/PPARG	9	BP
GO:0072330	monocarboxylic acid biosynthetic process	10/358	74/6899	0.00459901	0.00459901	0.108903	ABHD2/APOA4/APOC3/ELOVL1/FADS3/GIP/PPARG/PTGDS/PTGIS/SDS	10	BP
GO:0001885	endothelial cell development	5/358	22/6899	0.00463113	0.00463113	0.108903	CLDN5/MET/PPP1R16B/PROC/ROBO4	5	BP
GO:0019217	regulation of fatty acid metabolic process	5/358	22/6899	0.00463113	0.00463113	0.108903	APOA4/APOC3/GIP/MFSD2A/PPARG	5	BP
GO:0001523	retinoid metabolic process	4/358	14/6899	0.00471176	0.00471176	0.108903	CYP1A1/LRAT/RETSAT/SDR16C5	4	BP
GO:0016101	diterpenoid metabolic process	4/358	14/6899	0.00471176	0.00471176	0.108903	CYP1A1/LRAT/RETSAT/SDR16C5	4	BP
GO:0050432	catecholamine secretion	4/358	14/6899	0.00471176	0.00471176	0.108903	CHGA/SYT12/SYT13/SYT3	4	BP
GO:0050433	regulation of catecholamine secretion	4/358	14/6899	0.00471176	0.00471176	0.108903	CHGA/SYT12/SYT13/SYT3	4	BP
GO:0006066	alcohol metabolic process	14/358	125/6899	0.0051241	0.0051241	0.117187	ADH4/APOA1/APOA4/CLCN2/CYP1A1/DHCR24/EBP/GPER1/LRAT/RETSAT/SDR16C5/SOAT1/SREBF1/TSKU	14	BP
GO:0006486	protein glycosylation	12/358	100/6899	0.00535537	0.00535537	0.118727	B3GALT4/B3GAT2/B3GNT8/B4GALT1/DERL3/DPAGT1/GALNT15/GCNT7/KRTCAP2/LOC100513844/MPDU1/ST6GALNAC4	12	BP
GO:0010959	regulation of metal ion transport	12/358	100/6899	0.00535537	0.00535537	0.118727	ATP2B1/CASQ1/CD84/CNTN1/GPER1/HPCA/HRC/KCNG1/SARAF/SCN3B/SPINK1/STIM1	12	BP
GO:0043413	macromolecule glycosylation	12/358	100/6899	0.00535537	0.00535537	0.118727	B3GALT4/B3GAT2/B3GNT8/B4GALT1/DERL3/DPAGT1/GALNT15/GCNT7/KRTCAP2/LOC100513844/MPDU1/ST6GALNAC4	12	BP
GO:0045017	glycerolipid biosynthetic process	10/358	76/6899	0.00557537	0.00557537	0.120685	ANG/C3/CDS2/GPAT3/MBOAT7/MFSD2A/PGAP3/PIGU/PIGV/SREBF1	10	BP
GO:2000146	negative regulation of cell motility	10/358	76/6899	0.00557537	0.00557537	0.120685	ABHD2/ACVR1C/CALR/CCL25/CLDN5/GPER1/HYAL2/SFRP2/SPINT2/WNT11	10	BP
GO:0006636	unsaturated fatty acid biosynthetic process	5/358	23/6899	0.00567042	0.00567042	0.120685	ELOVL1/FADS3/PPARG/PTGDS/PTGIS	5	BP
GO:0090277	positive regulation of peptide hormone secretion	5/358	23/6899	0.00567042	0.00567042	0.120685	GHRL/GPER1/LRRC8A/PDX1/SCT	5	BP
GO:0055085	transmembrane transport	29/358	342/6899	0.00580481	0.00580481	0.120685	AQP7/ATP1A2/ATP2A2/C3/CACNA2D1/CASQ1/GABRA4/GPER1/HPCA/HRC/KCNG1/KCNJ13/KCNK1/KCNK5/KCNQ5/LRRC8A/RHAG/RHBG/SCN3B/SEC61A1/SEC61A2/SLC19A3/SLC25A53/SLC2A8/SLC35G1/SLC37A2/SLC8A3/SLCO3A1/STIM1	29	BP
GO:0051924	regulation of calcium ion transport	9/358	65/6899	0.00599308	0.00599308	0.120685	ATP2B1/CASQ1/CD84/GPER1/HPCA/HRC/SARAF/SPINK1/STIM1	9	BP
GO:0042886	amide transport	11/358	89/6899	0.00603154	0.00603154	0.120685	ACVR1C/CHGA/GHRL/GIP/GPER1/LRRC8A/PDX1/SCT/SIDT2/SSTR1/VIP	11	BP
GO:0008643	carbohydrate transport	7/358	43/6899	0.00610424	0.00610424	0.120685	AQP7/C3/MFSD12/MFSD2A/SLC17A5/SLC2A6/SLC2A8	7	BP
GO:0040011	locomotion	31/358	374/6899	0.0061282	0.0061282	0.120685	ABHD2/ACVR1C/BSG/CALR/CCL25/CCR10/CCRL2/CD99L2/CHGA/CLDN4/CLDN5/CNTN1/EFNA1/EPHA3/EPHB3/GPER1/HBEGF/HYAL2/JAML/MET/NTN1/PHLDA2/PIK3CD/RHOD/SEMA4F/SEMA6A/SFRP2/SLC37A4/SPINT2/SST/WNT11	31	BP
GO:0017158	regulation of calcium ion-dependent exocytosis	4/358	15/6899	0.00616583	0.00616583	0.120685	ATP2A2/SYT12/SYT13/SYT3	4	BP
GO:0032024	positive regulation of insulin secretion	4/358	15/6899	0.00616583	0.00616583	0.120685	GHRL/GPER1/LRRC8A/PDX1	4	BP
GO:0042304	regulation of fatty acid biosynthetic process	4/358	15/6899	0.00616583	0.00616583	0.120685	APOA4/APOC3/GIP/PPARG	4	BP
GO:0045576	mast cell activation	4/358	15/6899	0.00616583	0.00616583	0.120685	CD84/CHGA/NECTIN2/PTGDS	4	BP
GO:0030073	insulin secretion	8/358	54/6899	0.00622411	0.00622411	0.120738	ACVR1C/CHGA/GHRL/GIP/GPER1/LRRC8A/PDX1/SIDT2	8	BP
GO:0046883	regulation of hormone secretion	10/358	78/6899	0.00670672	0.00670672	0.12746	ACVR1C/CHGA/GHRL/GIP/GPER1/LRRC8A/PDX1/SCT/SIDT2/SSTR1	10	BP
GO:0070085	glycosylation	12/358	103/6899	0.00678398	0.00678398	0.12746	B3GALT4/B3GAT2/B3GNT8/B4GALT1/DERL3/DPAGT1/GALNT15/GCNT7/KRTCAP2/LOC100513844/MPDU1/ST6GALNAC4	12	BP
GO:0002793	positive regulation of peptide secretion	5/358	24/6899	0.00686392	0.00686392	0.12746	GHRL/GPER1/LRRC8A/PDX1/SCT	5	BP
GO:0042632	cholesterol homeostasis	5/358	24/6899	0.00686392	0.00686392	0.12746	APOA4/APOC3/SLC37A4/SOAT1/TSKU	5	BP
GO:0055092	sterol homeostasis	5/358	24/6899	0.00686392	0.00686392	0.12746	APOA4/APOC3/SLC37A4/SOAT1/TSKU	5	BP
GO:0098662	inorganic cation transmembrane transport	17/358	171/6899	0.00727796	0.00727796	0.132541	ATP1A2/ATP2A2/CASQ1/GPER1/HPCA/HRC/KCNG1/KCNJ13/KCNK1/KCNK5/KCNQ5/RHAG/RHBG/SCN3B/SLC35G1/SLC8A3/STIM1	17	BP
GO:1903305	regulation of regulated secretory pathway	6/358	34/6899	0.00731927	0.00731927	0.132541	ATP2A2/CD84/SYT12/SYT13/SYT3/VPS18	6	BP
GO:1904951	positive regulation of establishment of protein localization	9/358	67/6899	0.00732057	0.00732057	0.132541	ANG/BCAP31/GHRL/GPER1/HYAL2/LRRC8A/MYOM1/PDX1/PPARG	9	BP
GO:0002064	epithelial cell development	9/358	68/6899	0.00806325	0.00806325	0.144781	B4GALT1/CLDN5/MET/PPP1R16B/PROC/ROBO4/SIDT2/SPINT2/ST14	9	BP
GO:0030104	water homeostasis	5/358	25/6899	0.00822258	0.00822258	0.146432	AQP7/CLDN4/MET/SCT/UGCG	5	BP
GO:0046879	hormone secretion	11/358	93/6899	0.00837477	0.00837477	0.147929	ACVR1C/CHGA/GHRL/GIP/GPER1/LRRC8A/PDX1/SCT/SIDT2/SSTR1/VIP	11	BP
GO:0017157	regulation of exocytosis	8/358	57/6899	0.00863927	0.00863927	0.148968	ATP2A2/CD84/RAB3B/RAB3C/SYT12/SYT13/SYT3/VPS18	8	BP
GO:0042157	lipoprotein metabolic process	8/358	57/6899	0.00863927	0.00863927	0.148968	APOA1/APOA4/APOC3/APOE/PGAP3/PIGU/PIGV/UGCG	8	BP
GO:0055076	transition metal ion homeostasis	8/358	57/6899	0.00863927	0.00863927	0.148968	CYBRD1/FRRS1/HYAL2/MT-2B/SLC11A2/SLC31A2/SLC40A1/STEAP3	8	BP
GO:0008203	cholesterol metabolic process	7/358	46/6899	0.00887712	0.00887712	0.151864	APOA1/APOA4/DHCR24/EBP/SOAT1/SREBF1/TSKU	7	BP
GO:0044283	small molecule biosynthetic process	20/358	218/6899	0.00909918	0.00909918	0.154447	ABHD2/APOA4/APOC3/CLCN2/DHCR24/EBP/ELOVL1/FADS3/GGT1/GIP/GPER1/PCK2/PDXK/PPARG/PTGDS/PTGIS/RGN/SDS/SLC37A4/SREBF1	20	BP
GO:0015748	organophosphate ester transport	6/358	36/6899	0.00971684	0.00971684	0.163652	APOA1/APOA4/APOC3/LRRC8A/MFSD2A/SLC37A2	6	BP
GO:0006721	terpenoid metabolic process	4/358	17/6899	0.00990281	0.00990281	0.165501	CYP1A1/LRAT/RETSAT/SDR16C5	4	BP
GO:0009914	hormone transport	11/358	96/6899	0.0105543	0.0105543	0.172476	ACVR1C/CHGA/GHRL/GIP/GPER1/LRRC8A/PDX1/SCT/SIDT2/SSTR1/VIP	11	BP
GO:0006814	sodium ion transport	8/358	59/6899	0.0105998	0.0105998	0.172476	ATP1A2/ATP1B3/CNTN1/SCN3B/SLC5A10/SLC5A4/SLC5A8/SLC8A3	8	BP
GO:0031348	negative regulation of defense response	8/358	59/6899	0.0105998	0.0105998	0.172476	GHRL/GPER1/ISG15/PPARG/PROC/PTGIS/RNF26/TYRO3	8	BP
GO:0030336	negative regulation of cell migration	9/358	71/6899	0.0106377	0.0106377	0.172476	ABHD2/ACVR1C/CALR/CCL25/CLDN5/GPER1/HYAL2/SFRP2/WNT11	9	BP
GO:1902652	secondary alcohol metabolic process	7/358	48/6899	0.0111781	0.0111781	0.179896	APOA1/APOA4/DHCR24/EBP/SOAT1/SREBF1/TSKU	7	BP
GO:0061564	axon development	13/358	124/6899	0.011757	0.011757	0.187821	BSG/CCK/CNTN1/EFNA1/EPHA3/EPHB3/LPAR3/NTN1/SEMA4F/SEMA6A/TSKU/UCHL1/ZFYVE27	13	BP
GO:0051952	regulation of amine transport	4/358	18/6899	0.0122213	0.0122213	0.18962	CHGA/SYT12/SYT13/SYT3	4	BP
GO:0016125	sterol metabolic process	7/358	49/6899	0.012478	0.012478	0.18962	APOA1/APOA4/DHCR24/EBP/SOAT1/SREBF1/TSKU	7	BP
GO:0007586	digestion	6/358	38/6899	0.0126268	0.0126268	0.18962	APOA4/CCK/GHRL/SCT/UGCG/VDR	6	BP
GO:0010565	regulation of cellular ketone metabolic process	6/358	38/6899	0.0126268	0.0126268	0.18962	APOA4/APOC3/CLCN2/GIP/MFSD2A/PPARG	6	BP
GO:0003382	epithelial cell morphogenesis	3/358	10/6899	0.0126551	0.0126551	0.18962	MET/SPINT2/ST14	3	BP
GO:0014046	dopamine secretion	3/358	10/6899	0.0126551	0.0126551	0.18962	SYT12/SYT13/SYT3	3	BP
GO:0014059	regulation of dopamine secretion	3/358	10/6899	0.0126551	0.0126551	0.18962	SYT12/SYT13/SYT3	3	BP
GO:0033561	regulation of water loss via skin	3/358	10/6899	0.0126551	0.0126551	0.18962	CLDN4/MET/UGCG	3	BP
GO:0070296	sarcoplasmic reticulum calcium ion transport	3/358	10/6899	0.0126551	0.0126551	0.18962	ATP2A2/CASQ1/HRC	3	BP
GO:0007411	axon guidance	8/358	61/6899	0.012872	0.012872	0.190246	BSG/CNTN1/EFNA1/EPHA3/EPHB3/NTN1/SEMA4F/SEMA6A	8	BP
GO:0045055	regulated exocytosis	8/358	61/6899	0.012872	0.012872	0.190246	ATP2A2/CD84/CHGA/PTGDS/SYT12/SYT13/SYT3/VPS18	8	BP
GO:0007267	cell-cell signaling	33/358	427/6899	0.0131237	0.0131237	0.192656	ACVR1C/ATP2A2/CHGA/CHRDL1/CHRM2/CPE/DKK3/FRZB/FURIN/GABRA4/GHRL/GIP/GJB1/GPER1/LRRC8A/PDX1/RGS14/SCN3B/SCT/SFRP2/SIDT2/SLC8A3/SOSTDC1/SSTR1/SYT12/SYT13/SYT3/TAC1/TM2D3/TSKU/VIP/VPS18/WNT11	33	BP
GO:0043065	positive regulation of apoptotic process	14/358	140/6899	0.0135201	0.0135201	0.197143	ACVR1C/B4GALT1/BAK1/BCAP31/FRZB/HYAL2/PHLDA2/PIK3CD/PTGIS/RNF183/SFRP2/TNFRSF12A/VDR/WNT11	14	BP
GO:0097485	neuron projection guidance	8/358	62/6899	0.0141332	0.0141332	0.201787	BSG/CNTN1/EFNA1/EPHA3/EPHB3/NTN1/SEMA4F/SEMA6A	8	BP
GO:0030307	positive regulation of cell growth	6/358	39/6899	0.0142897	0.0142897	0.201787	LPAR3/MFSD2A/NTN1/SFRP2/SYT3/ZFYVE27	6	BP
GO:0055072	iron ion homeostasis	6/358	39/6899	0.0142897	0.0142897	0.201787	CYBRD1/FRRS1/HYAL2/SLC11A2/SLC40A1/STEAP3	6	BP
GO:0060627	regulation of vesicle-mediated transport	14/358	141/6899	0.0143279	0.0143279	0.201787	APOA1/APOC3/ATP2A2/BICD1/CALR/CD84/EPHA3/RAB3B/RAB3C/SFTPD/SYT12/SYT13/SYT3/VPS18	14	BP
GO:0046394	carboxylic acid biosynthetic process	12/358	114/6899	0.0147388	0.0147388	0.201787	ABHD2/APOA4/APOC3/ELOVL1/FADS3/GGT1/GIP/PPARG/PTGDS/PTGIS/RGN/SDS	12	BP
GO:0015837	amine transport	4/358	19/6899	0.0148603	0.0148603	0.201787	CHGA/SYT12/SYT13/SYT3	4	BP
GO:0017156	calcium-ion regulated exocytosis	4/358	19/6899	0.0148603	0.0148603	0.201787	ATP2A2/SYT12/SYT13/SYT3	4	BP
GO:0046461	neutral lipid catabolic process	4/358	19/6899	0.0148603	0.0148603	0.201787	ABHD2/APOA4/APOC3/PNLIPRP2	4	BP
GO:0046464	acylglycerol catabolic process	4/358	19/6899	0.0148603	0.0148603	0.201787	ABHD2/APOA4/APOC3/PNLIPRP2	4	BP
GO:0051937	catecholamine transport	4/358	19/6899	0.0148603	0.0148603	0.201787	CHGA/SYT12/SYT13/SYT3	4	BP
GO:0061028	establishment of endothelial barrier	4/358	19/6899	0.0148603	0.0148603	0.201787	CLDN5/PPP1R16B/PROC/ROBO4	4	BP
GO:0006720	isoprenoid metabolic process	5/358	29/6899	0.015513	0.015513	0.205513	BCO1/CYP1A1/LRAT/RETSAT/SDR16C5	5	BP
GO:0030433	ubiquitin-dependent ERAD pathway	5/358	29/6899	0.015513	0.015513	0.205513	BCAP31/CALR/DERL3/DNAJB12/RNF121	5	BP
GO:0070830	bicellular tight junction assembly	5/358	29/6899	0.015513	0.015513	0.205513	CLDN4/CLDN5/ESAM/OCEL1/WNT11	5	BP
GO:0120192	tight junction assembly	5/358	29/6899	0.015513	0.015513	0.205513	CLDN4/CLDN5/ESAM/OCEL1/WNT11	5	BP
GO:0016053	organic acid biosynthetic process	12/358	115/6899	0.0157148	0.0157148	0.206924	ABHD2/APOA4/APOC3/ELOVL1/FADS3/GGT1/GIP/PPARG/PTGDS/PTGIS/RGN/SDS	12	BP
GO:0002253	activation of immune response	10/358	89/6899	0.0164104	0.0164104	0.213952	BTNL9/C2/C3/C9/CFB/CFD/CFP/MASP1/NECTIN2/PVRIG	10	BP
GO:0034220	ion transmembrane transport	21/358	246/6899	0.0164455	0.0164455	0.213952	ATP1A2/ATP2A2/CACNA2D1/CASQ1/GABRA4/GPER1/HPCA/HRC/KCNG1/KCNJ13/KCNK1/KCNK5/KCNQ5/LRRC8A/RHAG/RHBG/SCN3B/SLC35G1/SLC37A2/SLC8A3/STIM1	21	BP
GO:0031639	plasminogen activation	3/358	11/6899	0.0167413	0.0167413	0.216226	CLEC3B/CTSZ/DHCR24	3	BP
GO:0043068	positive regulation of programmed cell death	14/358	144/6899	0.0169758	0.0169758	0.216226	ACVR1C/B4GALT1/BAK1/BCAP31/FRZB/HYAL2/PHLDA2/PIK3CD/PTGIS/RNF183/SFRP2/TNFRSF12A/VDR/WNT11	14	BP
GO:0048667	cell morphogenesis involved in neuron differentiation	14/358	144/6899	0.0169758	0.0169758	0.216226	BSG/CCK/CNTN1/EFNA1/EPHA3/EPHB3/LPAR3/MFSD2A/NTN1/SEMA4F/SEMA6A/TSKU/UCHL1/ZFYVE27	14	BP
GO:0032880	regulation of protein localization	18/358	202/6899	0.0170979	0.0170979	0.216226	ACVR1C/ANG/BCAP31/BICD1/CHGA/DERL3/EPHA3/GHRL/GIP/GPER1/HYAL2/LRRC8A/MYOM1/PDX1/PPARG/RHBDD3/SIDT2/VIP	18	BP
GO:1901137	carbohydrate derivative biosynthetic process	21/358	247/6899	0.017142	0.017142	0.216226	B3GALT4/B3GAT2/B3GNT8/B4GALT1/CHST1/DERL3/DPAGT1/ELOVL1/GALNT15/GCNT7/ITM2A/KRTCAP2/LOC100513844/MPDU1/PGAP3/PIGU/PIGV/PXYLP1/SOAT1/ST6GALNAC4/UGCG	21	BP
GO:0019216	regulation of lipid metabolic process	11/358	103/6899	0.017317	0.017317	0.216226	APOA4/APOC3/C3/CLCN2/GIP/GPER1/MBOAT7/MFSD2A/PPARG/SCT/SREBF1	11	BP
GO:0032102	negative regulation of response to external stimulus	11/358	103/6899	0.017317	0.017317	0.216226	F12/GHRL/GPER1/ISG15/PPARG/PROC/PTGIS/RNF26/SEMA6A/THBD/TYRO3	11	BP
GO:0006935	chemotaxis	17/358	188/6899	0.0176886	0.0176886	0.216448	BSG/CALR/CCL25/CCR10/CCRL2/CHGA/CNTN1/EFNA1/EPHA3/EPHB3/HBEGF/JAML/MET/NTN1/SEMA4F/SEMA6A/SLC37A4	17	BP
GO:0006695	cholesterol biosynthetic process	4/358	20/6899	0.0178329	0.0178329	0.216448	APOA4/DHCR24/EBP/SREBF1	4	BP
GO:0045600	positive regulation of fat cell differentiation	4/358	20/6899	0.0178329	0.0178329	0.216448	AAMDC/FRZB/PPARG/SFRP2	4	BP
GO:1901019	regulation of calcium ion transmembrane transporter activity	4/358	20/6899	0.0178329	0.0178329	0.216448	CASQ1/HPCA/HRC/STIM1	4	BP
GO:1902653	secondary alcohol biosynthetic process	4/358	20/6899	0.0178329	0.0178329	0.216448	APOA4/DHCR24/EBP/SREBF1	4	BP
GO:0070588	calcium ion transmembrane transport	8/358	65/6899	0.0184558	0.0184558	0.221313	ATP2A2/CASQ1/GPER1/HPCA/HRC/SLC35G1/SLC8A3/STIM1	8	BP
GO:1903829	positive regulation of protein localization	11/358	104/6899	0.0184992	0.0184992	0.221313	ANG/BCAP31/BICD1/EPHA3/GHRL/GPER1/HYAL2/LRRC8A/MYOM1/PDX1/PPARG	11	BP
GO:0042330	taxis	17/358	189/6899	0.0185457	0.0185457	0.221313	BSG/CALR/CCL25/CCR10/CCRL2/CHGA/CNTN1/EFNA1/EPHA3/EPHB3/HBEGF/JAML/MET/NTN1/SEMA4F/SEMA6A/SLC37A4	17	BP
GO:0048812	neuron projection morphogenesis	15/358	160/6899	0.0186411	0.0186411	0.221313	BSG/CCK/CNTN1/EFNA1/EPHA3/EPHB3/LPAR3/MFSD2A/NTN1/SEMA4F/SEMA6A/SYT3/TSKU/UCHL1/ZFYVE27	15	BP
GO:1905952	regulation of lipid localization	7/358	53/6899	0.0187748	0.0187748	0.221689	APOA1/APOA4/APOC3/C3/FURIN/LRAT/PPARG	7	BP
GO:0098655	cation transmembrane transport	17/358	190/6899	0.0194345	0.0194345	0.228237	ATP1A2/ATP2A2/CASQ1/GPER1/HPCA/HRC/KCNG1/KCNJ13/KCNK1/KCNK5/KCNQ5/RHAG/RHBG/SCN3B/SLC35G1/SLC8A3/STIM1	17	BP
GO:0019882	antigen processing and presentation	6/358	42/6899	0.0201811	0.0201811	0.233267	CALR/CD74/MFSD6/TAP1/TAP2/TAPBP	6	BP
GO:0006487	protein N-linked glycosylation	5/358	31/6899	0.0203996	0.0203996	0.233267	B4GALT1/DERL3/DPAGT1/KRTCAP2/MPDU1	5	BP
GO:0043297	apical junction assembly	5/358	31/6899	0.0203996	0.0203996	0.233267	CLDN4/CLDN5/ESAM/OCEL1/WNT11	5	BP
GO:0050829	defense response to Gram-negative bacterium	5/358	31/6899	0.0203996	0.0203996	0.233267	BPI/CHGA/DMBT1/LYPD8/ROMO1	5	BP
GO:0120193	tight junction organization	5/358	31/6899	0.0203996	0.0203996	0.233267	CLDN4/CLDN5/ESAM/OCEL1/WNT11	5	BP
GO:0006887	exocytosis	11/358	106/6899	0.0210422	0.0210422	0.235678	ATP2A2/CD84/CHGA/PTGDS/RAB3B/RAB3C/SCAMP1/SYT12/SYT13/SYT3/VPS18	11	BP
GO:0043407	negative regulation of MAP kinase activity	4/358	21/6899	0.0211501	0.0211501	0.235678	HYAL2/RGS14/SFRP2/UCHL1	4	BP
GO:0046889	positive regulation of lipid biosynthetic process	4/358	21/6899	0.0211501	0.0211501	0.235678	APOA4/MFSD2A/PPARG/SREBF1	4	BP
GO:0006904	vesicle docking involved in exocytosis	3/358	12/6899	0.0214782	0.0214782	0.235678	RAB3B/RAB3C/VPS18	3	BP
GO:0010559	regulation of glycoprotein biosynthetic process	3/358	12/6899	0.0214782	0.0214782	0.235678	ITM2A/PXYLP1/SOAT1	3	BP
GO:0034381	plasma lipoprotein particle clearance	3/358	12/6899	0.0214782	0.0214782	0.235678	APOC3/APOE/SCARB1	3	BP
GO:0043303	mast cell degranulation	3/358	12/6899	0.0214782	0.0214782	0.235678	CD84/CHGA/PTGDS	3	BP
GO:0071634	regulation of transforming growth factor beta production	3/358	12/6899	0.0214782	0.0214782	0.235678	FURIN/TSKU/WNT11	3	BP
GO:0051604	protein maturation	10/358	93/6899	0.0217437	0.0217437	0.237392	CLEC3B/CPE/CTSZ/DHCR24/DMBT1/F12/FURIN/GGT1/MMP16/TLL2	10	BP
GO:0031175	neuron projection development	20/358	238/6899	0.022089	0.022089	0.239957	BSG/CCK/CNTN1/EFNA1/EPHA3/EPHB3/GHRL/LPAR3/MANF/MFSD2A/NTN1/RETREG3/SEMA4F/SEMA6A/SFRP2/STMN4/SYT3/TSKU/UCHL1/ZFYVE27	20	BP
GO:0050728	negative regulation of inflammatory response	6/358	43/6899	0.0224639	0.0224639	0.242814	GHRL/GPER1/PPARG/PROC/PTGIS/TYRO3	6	BP
GO:0048858	cell projection morphogenesis	15/358	164/6899	0.0227918	0.0227918	0.243932	BSG/CCK/CNTN1/EFNA1/EPHA3/EPHB3/LPAR3/MFSD2A/NTN1/SEMA4F/SEMA6A/SYT3/TSKU/UCHL1/ZFYVE27	15	BP
GO:0120039	plasma membrane bounded cell projection morphogenesis	15/358	164/6899	0.0227918	0.0227918	0.243932	BSG/CCK/CNTN1/EFNA1/EPHA3/EPHB3/LPAR3/MFSD2A/NTN1/SEMA4F/SEMA6A/SYT3/TSKU/UCHL1/ZFYVE27	15	BP
GO:0036503	ERAD pathway	5/358	32/6899	0.0231808	0.0231808	0.245675	BCAP31/CALR/DERL3/DNAJB12/RNF121	5	BP
GO:0050770	regulation of axonogenesis	5/358	32/6899	0.0231808	0.0231808	0.245675	EPHB3/LPAR3/NTN1/SEMA6A/ZFYVE27	5	BP
GO:0050727	regulation of inflammatory response	11/358	108/6899	0.0238338	0.0238338	0.25137	CD74/GGT1/GHRL/GPER1/HYAL2/PPARG/PROC/PTGIS/RHBDD3/TLR9/TYRO3	11	BP
GO:0009725	response to hormone	17/358	195/6899	0.0243786	0.0243786	0.25454	ABHD2/ACVR1C/ANG/ATP2B1/CALR/GHRL/GPER1/JAK3/MZB1/POR/PPARG/SLC2A4/SLC2A8/STAT4/TIMP2/UGCG/VPS18	17	BP
GO:0010942	positive regulation of cell death	14/358	151/6899	0.0245965	0.0245965	0.25454	ACVR1C/B4GALT1/BAK1/BCAP31/FRZB/HYAL2/PHLDA2/PIK3CD/PTGIS/RNF183/SFRP2/TNFRSF12A/VDR/WNT11	14	BP
GO:0016126	sterol biosynthetic process	4/358	22/6899	0.024821	0.024821	0.25454	APOA4/DHCR24/EBP/SREBF1	4	BP
GO:0050891	multicellular organismal water homeostasis	4/358	22/6899	0.024821	0.024821	0.25454	AQP7/CLDN4/MET/UGCG	4	BP
GO:0050994	regulation of lipid catabolic process	4/358	22/6899	0.024821	0.024821	0.25454	APOA4/APOC3/MFSD2A/SCT	4	BP
GO:0032368	regulation of lipid transport	6/358	44/6899	0.0249143	0.0249143	0.25454	APOA1/APOA4/APOC3/FURIN/LRAT/PPARG	6	BP
GO:0051241	negative regulation of multicellular organismal process	22/358	272/6899	0.0249545	0.0249545	0.25454	ACVR1C/APOC3/ATP2A2/ATP2B1/CALR/CD84/CLDN5/F12/FURIN/GHRL/GPR55/PROC/RNF128/SCT/SEMA6A/SFRP2/SLC37A4/THBD/THBS2/TMEM176B/TSKU/WNT11	22	BP
GO:0022600	digestive system process	5/358	33/6899	0.0261959	0.0261959	0.264152	APOA4/GHRL/SCT/UGCG/VDR	5	BP
GO:0033559	unsaturated fatty acid metabolic process	5/358	33/6899	0.0261959	0.0261959	0.264152	ELOVL1/FADS3/PPARG/PTGDS/PTGIS	5	BP
GO:0001516	prostaglandin biosynthetic process	3/358	13/6899	0.0268695	0.0268695	0.264152	PPARG/PTGDS/PTGIS	3	BP
GO:0002279	mast cell activation involved in immune response	3/358	13/6899	0.0268695	0.0268695	0.264152	CD84/CHGA/PTGDS	3	BP
GO:0002448	mast cell mediated immunity	3/358	13/6899	0.0268695	0.0268695	0.264152	CD84/CHGA/PTGDS	3	BP
GO:0019433	triglyceride catabolic process	3/358	13/6899	0.0268695	0.0268695	0.264152	APOA4/APOC3/PNLIPRP2	3	BP
GO:0046457	prostanoid biosynthetic process	3/358	13/6899	0.0268695	0.0268695	0.264152	PPARG/PTGDS/PTGIS	3	BP
GO:0071604	transforming growth factor beta production	3/358	13/6899	0.0268695	0.0268695	0.264152	FURIN/TSKU/WNT11	3	BP
GO:0051047	positive regulation of secretion	9/358	83/6899	0.0273459	0.0273459	0.264538	ANG/GHRL/GPER1/LRRC8A/MYOM1/P2RY2/PDX1/PPARG/SCT	9	BP
GO:0051896	regulation of protein kinase B signaling	6/358	45/6899	0.027537	0.027537	0.264538	GPER1/HBEGF/HYAL2/IL26/MET/PIK3CD	6	BP
GO:0098742	cell-cell adhesion via plasma-membrane adhesion molecules	6/358	45/6899	0.027537	0.027537	0.264538	CDH1/CDH24/CLDN2/ESAM/JAML/NECTIN2	6	BP
GO:0032990	cell part morphogenesis	15/358	168/6899	0.0276034	0.0276034	0.264538	BSG/CCK/CNTN1/EFNA1/EPHA3/EPHB3/LPAR3/MFSD2A/NTN1/SEMA4F/SEMA6A/SYT3/TSKU/UCHL1/ZFYVE27	15	BP
GO:0042180	cellular ketone metabolic process	8/358	70/6899	0.0276394	0.0276394	0.264538	APOA4/APOC3/CLCN2/GIP/HAGHL/MFSD2A/PPARG/VKORC1L1	8	BP
GO:0042445	hormone metabolic process	8/358	70/6899	0.0276394	0.0276394	0.264538	CLCN2/CYP1A1/DIO1/FURIN/IYD/LRAT/RETSAT/SDR16C5	8	BP
GO:0015844	monoamine transport	4/358	23/6899	0.0288526	0.0288526	0.274939	CHGA/SYT12/SYT13/SYT3	4	BP
GO:0009247	glycolipid biosynthetic process	5/358	34/6899	0.0294505	0.0294505	0.276992	B3GALT4/PGAP3/PIGU/PIGV/UGCG	5	BP
GO:0034754	cellular hormone metabolic process	5/358	34/6899	0.0294505	0.0294505	0.276992	CLCN2/CYP1A1/LRAT/RETSAT/SDR16C5	5	BP
GO:0120254	olefinic compound metabolic process	5/358	34/6899	0.0294505	0.0294505	0.276992	CLCN2/CYP1A1/LRAT/RETSAT/SDR16C5	5	BP
GO:0015872	dopamine transport	3/358	14/6899	0.0329125	0.0329125	0.297865	SYT12/SYT13/SYT3	3	BP
GO:0030199	collagen fibril organization	3/358	14/6899	0.0329125	0.0329125	0.297865	FMOD/SFRP2/TNXB	3	BP
GO:1901264	carbohydrate derivative transport	3/358	14/6899	0.0329125	0.0329125	0.297865	LRRC8A/MFSD2A/SLC37A2	3	BP
GO:1903018	regulation of glycoprotein metabolic process	3/358	14/6899	0.0329125	0.0329125	0.297865	ITM2A/PXYLP1/SOAT1	3	BP
GO:0045834	positive regulation of lipid metabolic process	5/358	35/6899	0.0329494	0.0329494	0.297865	APOA4/MFSD2A/PPARG/SCT/SREBF1	5	BP
GO:0002792	negative regulation of peptide secretion	4/358	24/6899	0.0332504	0.0332504	0.297865	ACVR1C/CHGA/GHRL/SSTR1	4	BP
GO:0007156	homophilic cell adhesion via plasma membrane adhesion molecules	4/358	24/6899	0.0332504	0.0332504	0.297865	CDH1/CDH24/ESAM/NECTIN2	4	BP
GO:0071277	cellular response to calcium ion	4/358	24/6899	0.0332504	0.0332504	0.297865	HPCA/SYT12/SYT13/SYT3	4	BP
GO:0090278	negative regulation of peptide hormone secretion	4/358	24/6899	0.0332504	0.0332504	0.297865	ACVR1C/CHGA/GHRL/SSTR1	4	BP
GO:0030178	negative regulation of Wnt signaling pathway	6/358	47/6899	0.033315	0.033315	0.297865	DKK3/FRZB/SFRP2/SOSTDC1/TSKU/WNT11	6	BP
GO:0050680	negative regulation of epithelial cell proliferation	6/358	47/6899	0.033315	0.033315	0.297865	B4GALT1/GHRL/IL26/PDX1/SFRP2/VDR	6	BP
GO:0051048	negative regulation of secretion	6/358	47/6899	0.033315	0.033315	0.297865	ACVR1C/CD84/CHGA/GHRL/SCT/SSTR1	6	BP
GO:0034329	cell junction assembly	11/358	114/6899	0.0338229	0.0338229	0.301167	CDH24/CLDN4/CLDN5/EPHA3/EPHB3/ESAM/GHRL/LINGO4/OCEL1/RHOD/WNT11	11	BP
GO:0003013	circulatory system process	13/358	144/6899	0.0357909	0.0357909	0.317236	ATP2A2/ATP2B1/CHGA/CHRM2/CLDN5/EDN3/HBEGF/HRC/KCNK6/MFSD2A/P2RY2/PTGIS/SCN3B	13	BP
GO:0008202	steroid metabolic process	10/358	101/6899	0.0360088	0.0360088	0.317236	APOA1/APOA4/CLCN2/CYP1A1/DHCR24/EBP/SLC37A4/SOAT1/SREBF1/TSKU	10	BP
GO:0007043	cell-cell junction assembly	6/358	48/6899	0.0364774	0.0364774	0.317236	CDH24/CLDN4/CLDN5/ESAM/OCEL1/WNT11	6	BP
GO:0008361	regulation of cell size	6/358	48/6899	0.0364774	0.0364774	0.317236	LPAR3/LRRC8A/NTN1/SCT/SEMA6A/ZFYVE27	6	BP
GO:0051592	response to calcium ion	5/358	36/6899	0.0366965	0.0366965	0.317236	HPCA/KCNMB1/SYT12/SYT13/SYT3	5	BP
GO:0071901	negative regulation of protein serine/threonine kinase activity	5/358	36/6899	0.0366965	0.0366965	0.317236	HYAL2/RGS14/SFRP2/SLC8A3/UCHL1	5	BP
GO:2001257	regulation of cation channel activity	5/358	36/6899	0.0366965	0.0366965	0.317236	CASQ1/HPCA/HRC/KCNG1/STIM1	5	BP
GO:0006631	fatty acid metabolic process	12/358	130/6899	0.0368934	0.0368934	0.317236	ABHD2/APOA4/APOC3/C3/CYP1A1/ELOVL1/FADS3/GIP/MFSD2A/PPARG/PTGDS/PTGIS	12	BP
GO:0010038	response to metal ion	8/358	74/6899	0.0369644	0.0369644	0.317236	AOC1/CYBRD1/HPCA/KCNMB1/MT-2B/SYT12/SYT13/SYT3	8	BP
GO:0016477	cell migration	30/358	413/6899	0.0370877	0.0370877	0.317236	ABHD2/ACVR1C/ANG/B4GALT1/CALR/CCK/CCL25/CCR10/CCRL2/CD99L2/CHGA/CLDN4/CLDN5/EPHB3/GPER1/HBEGF/HYAL2/JAML/MBOAT7/MET/NTN1/PHLDA2/PIK3CD/RHOD/SEMA6A/SFRP2/SLC37A4/SST/TYRO3/WNT11	30	BP
GO:0043491	protein kinase B signaling	7/358	61/6899	0.0374417	0.0374417	0.318521	GPER1/HBEGF/HYAL2/IL26/MET/PIK3CD/TYRO3	7	BP
GO:2000145	regulation of cell motility	20/358	252/6899	0.0375312	0.0375312	0.318521	ABHD2/ACVR1C/CALR/CCL25/CD99L2/CLDN4/CLDN5/GPER1/HBEGF/HYAL2/MET/NTN1/PHLDA2/PIK3CD/RHOD/SEMA6A/SFRP2/SPINT2/SST/WNT11	20	BP
GO:0006766	vitamin metabolic process	4/358	25/6899	0.0380176	0.0380176	0.318912	LRAT/PDXK/RGN/VKORC1L1	4	BP
GO:0015914	phospholipid transport	4/358	25/6899	0.0380176	0.0380176	0.318912	APOA1/APOA4/APOC3/MFSD2A	4	BP
GO:0061387	regulation of extent of cell growth	4/358	25/6899	0.0380176	0.0380176	0.318912	LPAR3/NTN1/SEMA6A/ZFYVE27	4	BP
GO:0030514	negative regulation of BMP signaling pathway	3/358	15/6899	0.0395992	0.0395992	0.323438	CHRDL1/SFRP2/SOSTDC1	3	BP
GO:0043299	leukocyte degranulation	3/358	15/6899	0.0395992	0.0395992	0.323438	CD84/CHGA/PTGDS	3	BP
GO:0046928	regulation of neurotransmitter secretion	3/358	15/6899	0.0395992	0.0395992	0.323438	ATP2A2/SYT12/VPS18	3	BP
GO:0048546	digestive tract morphogenesis	3/358	15/6899	0.0395992	0.0395992	0.323438	EPHB3/SFRP2/WNT11	3	BP
GO:0050772	positive regulation of axonogenesis	3/358	15/6899	0.0395992	0.0395992	0.323438	LPAR3/NTN1/ZFYVE27	3	BP
GO:0050819	negative regulation of coagulation	3/358	15/6899	0.0395992	0.0395992	0.323438	F12/PROC/THBD	3	BP
GO:0050892	intestinal absorption	3/358	15/6899	0.0395992	0.0395992	0.323438	APOA4/UGCG/VDR	3	BP
GO:0001558	regulation of cell growth	10/358	103/6899	0.0404043	0.0404043	0.325058	FRZB/HYAL2/LPAR3/MFSD2A/NTN1/SEMA6A/SFRP2/SYT3/WNT11/ZFYVE27	10	BP
GO:0002683	negative regulation of immune system process	10/358	103/6899	0.0404043	0.0404043	0.325058	CCL25/CD84/GPER1/GPR55/ISG15/PVRIG/RHBDD3/TMEM176B/TYRO3/VSIR	10	BP
GO:0007167	enzyme-linked receptor protein signaling pathway	22/358	286/6899	0.0405677	0.0405677	0.325058	ACVR1B/ACVR1C/CHRDL1/CLDN5/EFNA1/EPHA3/EPHB3/FRK/GPER1/HBEGF/JAK3/LOC100152566/MET/MUC20/MZB1/PIK3CD/PMEPA1/SEMA6A/SFRP2/SLC2A8/SOSTDC1/TYRO3	22	BP
GO:0010466	negative regulation of peptidase activity	5/358	37/6899	0.0406953	0.0406953	0.325058	DHCR24/SERPINA1/SFRP2/SPINK1/TIMP2	5	BP
GO:0010951	negative regulation of endopeptidase activity	5/358	37/6899	0.0406953	0.0406953	0.325058	DHCR24/SERPINA1/SFRP2/SPINK1/TIMP2	5	BP
GO:0046887	positive regulation of hormone secretion	5/358	37/6899	0.0406953	0.0406953	0.325058	GHRL/GPER1/LRRC8A/PDX1/SCT	5	BP
GO:0001818	negative regulation of cytokine production	8/358	76/6899	0.0423376	0.0423376	0.335325	ATP2B1/CD84/FURIN/GHRL/RNF128/SLC37A4/TSKU/WNT11	8	BP
GO:0006081	cellular aldehyde metabolic process	4/358	26/6899	0.0431559	0.0431559	0.335325	CLCN2/HAGHL/PDXK/SDR16C5	4	BP
GO:0046503	glycerolipid catabolic process	4/358	26/6899	0.0431559	0.0431559	0.335325	ABHD2/APOA4/APOC3/PNLIPRP2	4	BP
GO:0051897	positive regulation of protein kinase B signaling	4/358	26/6899	0.0431559	0.0431559	0.335325	HBEGF/IL26/MET/PIK3CD	4	BP
GO:0060191	regulation of lipase activity	4/358	26/6899	0.0431559	0.0431559	0.335325	ANG/APOA4/APOC3/GPR55	4	BP
GO:0032989	cellular component morphogenesis	17/358	209/6899	0.0432702	0.0432702	0.335325	BSG/CASQ1/CCK/CNTN1/EFNA1/EPHA3/EPHB3/LPAR3/MFSD2A/NECTIN2/NTN1/SEMA4F/SEMA6A/SYT3/TSKU/UCHL1/ZFYVE27	17	BP
GO:0043270	positive regulation of ion transport	6/358	50/6899	0.0433639	0.0433639	0.335325	ATP2B1/CASQ1/CNTN1/GPER1/SCN3B/STIM1	6	BP
GO:0006813	potassium ion transport	7/358	63/6899	0.0435241	0.0435241	0.335325	ATP1A2/ATP1B3/KCNG1/KCNJ13/KCNK1/KCNK5/KCNQ5	7	BP
GO:0007204	positive regulation of cytosolic calcium ion concentration	7/358	63/6899	0.0435241	0.0435241	0.335325	BCAP31/CCR10/CCRL2/GHRL/GPER1/GPR55/TAC1	7	BP
GO:0060560	developmental growth involved in morphogenesis	7/358	63/6899	0.0435241	0.0435241	0.335325	LPAR3/NTN1/SEMA6A/SFRP2/SYT3/WNT11/ZFYVE27	7	BP
GO:0042060	wound healing	11/358	119/6899	0.0441625	0.0441625	0.339042	B4GALT1/CLDN4/F10/F12/F7/HABP2/HBEGF/PROC/THBD/TSKU/TYRO3	11	BP
GO:0048585	negative regulation of response to stimulus	32/358	453/6899	0.0443861	0.0443861	0.339559	CALR/CASTOR2/CD84/CHRDL1/DKK3/F12/FRZB/GHRL/GPER1/HYAL2/ISG15/MET/PDX1/PMEPA1/PPARG/PROC/PTGIS/PTTG1IP/PVRIG/RGS14/RNF26/SEMA6A/SFRP2/SLC35F6/SOSTDC1/SPINK1/THBD/TSKU/TYRO3/UCHL1/VPS18/WNT11	32	BP
GO:0009746	response to hexose	5/358	38/6899	0.0449481	0.0449481	0.340264	ACVR1C/GIP/GPER1/PDX1/SIDT2	5	BP
GO:0009749	response to glucose	5/358	38/6899	0.0449481	0.0449481	0.340264	ACVR1C/GIP/GPER1/PDX1/SIDT2	5	BP
GO:0034284	response to monosaccharide	5/358	38/6899	0.0449481	0.0449481	0.340264	ACVR1C/GIP/GPER1/PDX1/SIDT2	5	BP
GO:0043434	response to peptide hormone	9/358	91/6899	0.0456012	0.0456012	0.344009	ACVR1C/ATP2B1/GPER1/JAK3/MZB1/PPARG/SLC2A4/SLC2A8/STAT4	9	BP
GO:0048666	neuron development	21/358	274/6899	0.0462135	0.0462135	0.347422	BSG/CCK/CNTN1/EFNA1/EPHA3/EPHB3/GHRL/LPAR3/MANF/MFSD2A/NTN1/RETREG3/SEMA4F/SEMA6A/SFRP2/STMN4/SYT3/TSKU/UCHL1/UGCG/ZFYVE27	21	BP
GO:0045123	cellular extravasation	3/358	16/6899	0.0469167	0.0469167	0.349085	CCL25/CD99L2/JAML	3	BP
GO:0046470	phosphatidylcholine metabolic process	3/358	16/6899	0.0469167	0.0469167	0.349085	APOA4/MBOAT7/MFSD2A	3	BP
GO:0046676	negative regulation of insulin secretion	3/358	16/6899	0.0469167	0.0469167	0.349085	ACVR1C/CHGA/GHRL	3	BP
GO:0005975	carbohydrate metabolic process	18/358	227/6899	0.0472176	0.0472176	0.350125	B3GAT2/B3GNT8/B4GALT1/CHST1/GPD1/GPER1/GUSB/HEXA/HYAL2/LCTL/MAN1A2/MPDU1/PCK2/PDX1/PHLDA2/RGN/SLC37A4/TFF3	18	BP
GO:1903532	positive regulation of secretion by cell	8/358	78/6899	0.0482045	0.0482045	0.356227	ANG/GHRL/GPER1/LRRC8A/MYOM1/PDX1/PPARG/SCT	8	BP
GO:0051928	positive regulation of calcium ion transport	4/358	27/6899	0.0486652	0.0486652	0.357201	ATP2B1/CASQ1/GPER1/STIM1	4	BP
GO:0140056	organelle localization by membrane tethering	4/358	27/6899	0.0486652	0.0486652	0.357201	ATP2A2/RAB3B/RAB3C/VPS18	4	BP
GO:0031984	organelle subcompartment	62/442	459/7848	4.71848e-11	4.71848e-11	1.2417e-08	AGPAT3/ATP2A2/B4GALT1/BCAP31/BICD1/BSG/CALR/CHST1/CYP1A1/CYP3A29/CYP3A46/DERL3/DIO1/DNAJB12/DPAGT1/EBP/ELOVL1/FADS3/FURIN/GPAT3/GPER1/HSD11B1/LOC100513844/LPGAT1/MLEC/MOGAT2/PIGU/PIGV/POR/PTGIS/RAB38/RETSAT/RNF121/RNF183/RNF26/RTN1/SARAF/SCAMP1/SCAMP2/SCAMP4/SDR16C5/SEC61A1/SEC61A2/SIGMAR1/SLC35G1/SLC37A2/SLC37A4/SLC8A3/SOAT1/SPPL2B/SREBF1/STIM1/TAP1/TAP2/TLR9/TMEM115/TMEM39A/TYRO3/UCHL1/VKORC1L1…	62	CC
GO:0005789	endoplasmic reticulum membrane	51/442	356/7848	3.6463e-10	3.6463e-10	3.59924e-08	AGPAT3/ATP2A2/BCAP31/BSG/CALR/CYP1A1/CYP3A29/CYP3A46/DERL3/DIO1/DNAJB12/DPAGT1/EBP/ELOVL1/FADS3/GPAT3/HSD11B1/LPGAT1/MLEC/MOGAT2/PIGU/PIGV/POR/PTGIS/RETSAT/RNF121/RNF183/RNF26/RTN1/SARAF/SDR16C5/SEC61A1/SEC61A2/SIGMAR1/SLC35G1/SLC37A2/SLC37A4/SLC8A3/SOAT1/SPPL2B/SREBF1/STIM1/TAP1/TAP2/TLR9/TMEM39A/TYRO3/UCHL1/VKORC1L1/XK/ZFYVE27	51	CC
GO:0042175	nuclear outer membrane-endoplasmic reticulum membrane network	51/442	358/7848	4.47053e-10	4.47053e-10	3.59924e-08	AGPAT3/ATP2A2/BCAP31/BSG/CALR/CYP1A1/CYP3A29/CYP3A46/DERL3/DIO1/DNAJB12/DPAGT1/EBP/ELOVL1/FADS3/GPAT3/HSD11B1/LPGAT1/MLEC/MOGAT2/PIGU/PIGV/POR/PTGIS/RETSAT/RNF121/RNF183/RNF26/RTN1/SARAF/SDR16C5/SEC61A1/SEC61A2/SIGMAR1/SLC35G1/SLC37A2/SLC37A4/SLC8A3/SOAT1/SPPL2B/SREBF1/STIM1/TAP1/TAP2/TLR9/TMEM39A/TYRO3/UCHL1/VKORC1L1/XK/ZFYVE27	51	CC
GO:0098827	endoplasmic reticulum subcompartment	51/442	360/7848	5.47085e-10	5.47085e-10	3.59924e-08	AGPAT3/ATP2A2/BCAP31/BSG/CALR/CYP1A1/CYP3A29/CYP3A46/DERL3/DIO1/DNAJB12/DPAGT1/EBP/ELOVL1/FADS3/GPAT3/HSD11B1/LPGAT1/MLEC/MOGAT2/PIGU/PIGV/POR/PTGIS/RETSAT/RNF121/RNF183/RNF26/RTN1/SARAF/SDR16C5/SEC61A1/SEC61A2/SIGMAR1/SLC35G1/SLC37A2/SLC37A4/SLC8A3/SOAT1/SPPL2B/SREBF1/STIM1/TAP1/TAP2/TLR9/TMEM39A/TYRO3/UCHL1/VKORC1L1/XK/ZFYVE27	51	CC
GO:0031226	intrinsic component of plasma membrane	50/442	450/7848	2.19064e-06	2.19064e-06	0.000115297	ACVR1B/ACVR1C/AQP7/ATP1A2/ATP1B3/ATP2B1/BCAP31/C9/CCRL2/CHRM2/CLDN4/CNTN1/CYBA/EFNA1/EPHA3/EPHB3/GABRA4/GPC1/GPR55/HBEGF/HYAL2/IL6R/ITGB5/IYD/KCNG1/KCNK1/KCNK5/KCNMB1/KCNQ5/LOC106507519/LRRC8A/MET/MFSD2A/MMP16/RHAG/RHBG/SCN3B/SEMA6A/SLC16A1/SLC16A9/SLC2A8/SLC52A2/SLC6A8/SLC8A3/SLCO3A1/SSTR1/SYT13/THBD/TSPAN1/TYRO3	50	CC
GO:0005887	integral component of plasma membrane	46/442	426/7848	1.23123e-05	1.23123e-05	0.000540012	ACVR1B/ACVR1C/AQP7/ATP1A2/ATP1B3/ATP2B1/BCAP31/C9/CCRL2/CHRM2/CLDN4/CYBA/EPHA3/EPHB3/GABRA4/GPR55/HBEGF/IL6R/ITGB5/IYD/KCNG1/KCNK1/KCNK5/KCNMB1/KCNQ5/LOC106507519/LRRC8A/MET/MFSD2A/MMP16/RHAG/RHBG/SCN3B/SEMA6A/SLC16A1/SLC16A9/SLC2A8/SLC52A2/SLC6A8/SLC8A3/SLCO3A1/SSTR1/SYT13/THBD/TSPAN1/TYRO3	46	CC
GO:0030176	integral component of endoplasmic reticulum membrane	13/442	63/7848	3.78205e-05	3.78205e-05	0.00142182	CALR/DERL3/DNAJB12/HSD11B1/PIGU/SARAF/SEC61A1/SLC37A2/SPPL2B/STIM1/TAP1/TAP2/ZFYVE27	13	CC
GO:0031227	intrinsic component of endoplasmic reticulum membrane	13/442	65/7848	5.35073e-05	5.35073e-05	0.00176011	CALR/DERL3/DNAJB12/HSD11B1/PIGU/SARAF/SEC61A1/SLC37A2/SPPL2B/STIM1/TAP1/TAP2/ZFYVE27	13	CC
GO:0000323	lytic vacuole	22/442	167/7848	0.000158842	0.000158842	0.00418006	CALR/CDIP1/CTSF/CTSL/CTSZ/CYBRD1/GUSB/HEXA/HYAL2/LRRC8A/MFSD12/OSTM1/RAB38/RNASET2/SIDT2/SLC17A5/SLC29A3/SLC35F6/SPPL2B/TLR9/TM4SF5/VPS18	22	CC
GO:0005764	lysosome	22/442	167/7848	0.000158842	0.000158842	0.00418006	CALR/CDIP1/CTSF/CTSL/CTSZ/CYBRD1/GUSB/HEXA/HYAL2/LRRC8A/MFSD12/OSTM1/RAB38/RNASET2/SIDT2/SLC17A5/SLC29A3/SLC35F6/SPPL2B/TLR9/TM4SF5/VPS18	22	CC
GO:0005773	vacuole	23/442	200/7848	0.000828897	0.000828897	0.0198301	ATP6V0A1/CALR/CDIP1/CTSF/CTSL/CTSZ/CYBRD1/GUSB/HEXA/HYAL2/LRRC8A/MFSD12/OSTM1/RAB38/RNASET2/SIDT2/SLC17A5/SLC29A3/SLC35F6/SPPL2B/TLR9/TM4SF5/VPS18	23	CC
GO:0043296	apical junction complex	10/442	59/7848	0.00151066	0.00151066	0.0331284	AOC1/CLDN15/CLDN2/CLDN4/CLDN5/ESAM/JAML/MPP3/NECTIN2/OCEL1	10	CC
GO:0031301	integral component of organelle membrane	17/442	138/7848	0.00184155	0.00184155	0.0372783	ATP2B1/CALR/DERL3/DNAJB12/FURIN/HSD11B1/LRRC8A/PET100/PIGU/SARAF/SEC61A1/SLC37A2/SPPL2B/STIM1/TAP1/TAP2/ZFYVE27	17	CC
GO:0005923	bicellular tight junction	9/442	53/7848	0.00254018	0.00254018	0.0477478	AOC1/CLDN15/CLDN2/CLDN4/CLDN5/ESAM/JAML/MPP3/OCEL1	9	CC
GO:0031300	intrinsic component of organelle membrane	17/442	145/7848	0.00313	0.00313	0.0549122	ATP2B1/CALR/DERL3/DNAJB12/FURIN/HSD11B1/LRRC8A/PET100/PIGU/SARAF/SEC61A1/SLC37A2/SPPL2B/STIM1/TAP1/TAP2/ZFYVE27	17	CC
GO:0034364	high-density lipoprotein particle	4/442	12/7848	0.00341959	0.00341959	0.0562432	APOA1/APOA4/APOC3/APOE	4	CC
GO:0070160	tight junction	9/442	56/7848	0.00374034	0.00374034	0.0579	AOC1/CLDN15/CLDN2/CLDN4/CLDN5/ESAM/JAML/MPP3/OCEL1	9	CC
GO:0016529	sarcoplasmic reticulum	4/442	14/7848	0.00632079	0.00632079	0.0864151	ATP2A2/CALR/CASQ1/RASD1	4	CC
GO:0031225	anchored component of membrane	7/442	40/7848	0.00633242	0.00633242	0.0864151	CNTN1/EFNA1/GFRA1/GPC1/HYAL2/LOC100522404/RHBG	7	CC
GO:0046658	anchored component of plasma membrane	5/442	22/7848	0.00656755	0.00656755	0.0864151	CNTN1/EFNA1/GPC1/HYAL2/RHBG	5	CC
GO:0030133	transport vesicle	13/442	109/7848	0.00799827	0.00799827	0.0958313	ATP2B1/CHGA/CPE/DMBT1/FURIN/NRSN1/RAB3B/RAB3C/SCAMP1/SREBF1/SYT12/SYT13/SYT3	13	CC
GO:0005788	endoplasmic reticulum lumen	5/442	23/7848	0.0080115	0.0080115	0.0958313	CALR/CASQ1/MZB1/PDIA3/TOR3A	5	CC
GO:0044232	organelle membrane contact site	4/442	16/7848	0.0105085	0.0105085	0.112743	BCAP31/MBOAT7/RAB38/SARAF	4	CC
GO:0005765	lysosomal membrane	10/442	77/7848	0.0107106	0.0107106	0.112743	CDIP1/CYBRD1/LRRC8A/OSTM1/SIDT2/SLC17A5/SLC29A3/SLC35F6/SPPL2B/TM4SF5	10	CC
GO:0098852	lytic vacuole membrane	10/442	77/7848	0.0107106	0.0107106	0.112743	CDIP1/CYBRD1/LRRC8A/OSTM1/SIDT2/SLC17A5/SLC29A3/SLC35F6/SPPL2B/TM4SF5	10	CC
GO:0030312	external encapsulating structure	14/442	128/7848	0.0126541	0.0126541	0.115285	ANG/ANGPTL2/APOE/COL9A2/DMP1/FMOD/GPC1/LINGO1/LINGO4/MMP16/NTN1/TIMP2/TNXB/WNT11	14	CC
GO:0031012	extracellular matrix	14/442	128/7848	0.0126541	0.0126541	0.115285	ANG/ANGPTL2/APOE/COL9A2/DMP1/FMOD/GPC1/LINGO1/LINGO4/MMP16/NTN1/TIMP2/TNXB/WNT11	14	CC
GO:0032994	protein-lipid complex	4/442	17/7848	0.0131425	0.0131425	0.115285	APOA1/APOA4/APOC3/APOE	4	CC
GO:0034358	plasma lipoprotein particle	4/442	17/7848	0.0131425	0.0131425	0.115285	APOA1/APOA4/APOC3/APOE	4	CC
GO:1990777	lipoprotein particle	4/442	17/7848	0.0131425	0.0131425	0.115285	APOA1/APOA4/APOC3/APOE	4	CC
GO:0044233	mitochondria-associated endoplasmic reticulum membrane	3/442	10/7848	0.0158192	0.0158192	0.134289	BCAP31/MBOAT7/RAB38	3	CC
GO:0140534	endoplasmic reticulum protein-containing complex	8/442	59/7848	0.0168145	0.0168145	0.135297	CALR/DERL3/MZB1/PIGU/SEC61A1/SEC61A2/TAP1/TAP2	8	CC
GO:0000139	Golgi membrane	16/442	159/7848	0.0169662	0.0169662	0.135297	B3GALT4/B3GAT2/B3GNT8/B4GALT1/BCAP31/CHST1/FURIN/GALNT15/GCNT7/LOC100152566/MAN1A2/PGAP3/RNF121/SREBF1/TPST2/UGCG	16	CC
GO:0055038	recycling endosome membrane	4/442	19/7848	0.0195826	0.0195826	0.147424	SCAMP1/SCAMP2/SCAMP4/ZFYVE27	4	CC
GO:0005768	endosome	24/442	273/7848	0.0196074	0.0196074	0.147424	CDIP1/EPHA3/GPER1/KCNK1/MFSD12/PMEPA1/RAB38/RAB3B/RAB3C/RNF128/SCAMP1/SCAMP2/SCAMP4/SFTPD/SNX32/SPPL2B/STARD3/STEAP3/SYT3/TLR9/TMEM184A/TRAPPC5/VPS18/ZFYVE27	24	CC
GO:0009925	basal plasma membrane	8/442	61/7848	0.0202619	0.0202619	0.148113	AQP7/ATP2B1/B4GALT1/BSG/MET/RHBG/SCARB1/SLC40A1	8	CC
GO:0005774	vacuolar membrane	11/442	99/7848	0.0229315	0.0229315	0.16217	ATP6V0A1/CDIP1/CYBRD1/LRRC8A/OSTM1/SIDT2/SLC17A5/SLC29A3/SLC35F6/SPPL2B/TM4SF5	11	CC
GO:0016528	sarcoplasm	4/442	20/7848	0.0234174	0.0234174	0.16217	ATP2A2/CALR/CASQ1/RASD1	4	CC
GO:0045178	basal part of cell	8/442	65/7848	0.02861	0.02861	0.188312	AQP7/ATP2B1/B4GALT1/BSG/MET/RHBG/SCARB1/SLC40A1	8	CC
GO:0098797	plasma membrane protein complex	18/442	197/7848	0.0286234	0.0286234	0.188312	ACVR1B/ACVR1C/ATP1A2/ATP1B3/C9/CACNA2D1/CATSPERE/CDH24/CYBA/GJB1/IL6R/ITGB5/KCNG1/KCNK1/KCNMB1/KCNQ5/SCN3B/SSTR1	18	CC
GO:0016323	basolateral plasma membrane	7/442	54/7848	0.0307086	0.0307086	0.197103	AQP7/ATP2B1/B4GALT1/BSG/RHBG/SCARB1/SLC40A1	7	CC
GO:0098791	Golgi apparatus subcompartment	11/442	105/7848	0.0336334	0.0336334	0.210729	B4GALT1/BICD1/CHST1/FURIN/GPER1/LOC100513844/RAB38/SCAMP1/SCAMP2/SCAMP4/TMEM115	11	CC
GO:0005911	cell-cell junction	14/442	146/7848	0.0352338	0.0352338	0.210729	AOC1/B4GALT1/CD99L2/CDH24/CLDN15/CLDN2/CLDN4/CLDN5/ESAM/GJB1/JAML/MPP3/NECTIN2/OCEL1	14	CC
GO:1902495	transmembrane transporter complex	14/442	146/7848	0.0352338	0.0352338	0.210729	ATP1A2/ATP1B3/CACNA2D1/CATSPERE/GABRA4/KCNG1/KCNK1/KCNMB1/KCNQ5/LRRC8A/NDUFA11/NDUFA3/OSTM1/SCN3B	14	CC
GO:0099503	secretory vesicle	14/442	148/7848	0.0388856	0.0388856	0.227401	ABHD2/ATP2B1/BICD1/CALR/CFP/CHGA/DMBT1/RAB3B/RAB3C/SCAMP1/SYT12/SYT13/SYT3/TFF3	14	CC
GO:0032588	trans-Golgi network membrane	3/442	14/7848	0.0405993	0.0405993	0.228497	SCAMP1/SCAMP2/SCAMP4	3	CC
GO:1990351	transporter complex	14/442	149/7848	0.0408095	0.0408095	0.228497	ATP1A2/ATP1B3/CACNA2D1/CATSPERE/GABRA4/KCNG1/KCNK1/KCNMB1/KCNQ5/LRRC8A/NDUFA11/NDUFA3/OSTM1/SCN3B	14	CC
GO:0034702	ion channel complex	10/442	97/7848	0.0456903	0.0456903	0.24981	CACNA2D1/CATSPERE/GABRA4/KCNG1/KCNK1/KCNMB1/KCNQ5/LRRC8A/OSTM1/SCN3B	10	CC
GO:0005791	rough endoplasmic reticulum	6/442	47/7848	0.0468412	0.0468412	0.24981	F12/LRAT/PTGDS/SEC61A1/SEC61A2/SFTPD	6	CC
GO:0043235	receptor complex	11/442	111/7848	0.0474639	0.0474639	0.24981	ACVR1B/ACVR1C/EPHA3/EPHB3/GABRA4/IL6R/ITGB5/MET/SSTR1/TYRO3/VDR	11	CC
GO:0005802	trans-Golgi network	8/442	72/7848	0.0484214	0.0484214	0.249852	BICD1/CHST1/FURIN/GPER1/RAB38/SCAMP1/SCAMP2/SCAMP4	8	CC
GO:0022857	transmembrane transporter activity	64/363	489/7135	6.93644e-13	6.93644e-13	2.46061e-10	ANKH/AQP7/AQP8/ASIC3/ATP1A2/ATP2A2/ATP2B1/ATP6V0A1/ATP6V1C2/CACNA2D1/CLCN2/CYBRD1/GABRA4/GJB1/KCNAB1/KCNG1/KCNJ13/KCNK1/KCNK5/KCNK6/KCNMB1/KCNQ5/LRRC8A/MFSD12/MFSD2A/MFSD5/RHAG/RHBG/SCN3B/SEC61A1/SEC61A2/SIDT2/SLC11A2/SLC15A2/SLC16A1/SLC16A9/SLC17A5/SLC19A3/SLC22A15/SLC23A2/SLC25A53/SLC29A3/SLC2A4/SLC2A6/SLC2A8/SLC30A10/SLC31A2/SLC35F6/SLC37A2/SLC37A4/SLC39A5/SLC40A1/SLC52A2/SLC5A10/SLC5A4/SLC5A8…	64	MF
GO:0015075	ion transmembrane transporter activity	46/363	351/7135	1.73777e-09	1.73777e-09	3.08225e-07	ANKH/ASIC3/ATP1A2/ATP2A2/ATP2B1/ATP6V0A1/ATP6V1C2/CACNA2D1/CLCN2/GABRA4/KCNAB1/KCNG1/KCNJ13/KCNK1/KCNK5/KCNK6/KCNMB1/KCNQ5/LRRC8A/MFSD12/MFSD2A/MFSD5/RHAG/RHBG/SCN3B/SEC61A1/SLC11A2/SLC16A1/SLC16A9/SLC19A3/SLC23A2/SLC2A8/SLC30A10/SLC31A2/SLC37A2/SLC37A4/SLC39A5/SLC40A1/SLC52A2/SLC5A4/SLC5A8/SLC6A8/SLC8A3/SLCO3A1/TMEM37/TMEM63B	46	MF
GO:0015318	inorganic molecular entity transmembrane transporter activity	39/363	307/7135	7.93261e-08	7.93261e-08	9.37996e-06	ANKH/AQP7/ASIC3/ATP1A2/ATP2A2/ATP2B1/ATP6V0A1/ATP6V1C2/CACNA2D1/CLCN2/GABRA4/KCNAB1/KCNG1/KCNJ13/KCNK1/KCNK5/KCNK6/KCNMB1/KCNQ5/LRRC8A/MFSD2A/MFSD5/RHAG/RHBG/SCN3B/SEC61A1/SLC11A2/SLC23A2/SLC31A2/SLC37A2/SLC37A4/SLC39A5/SLC40A1/SLC5A4/SLC5A8/SLC6A8/SLC8A3/TMEM37/TMEM63B	39	MF
GO:0008324	cation transmembrane transporter activity	35/363	267/7135	1.77605e-07	1.77605e-07	1.26337e-05	ASIC3/ATP1A2/ATP2A2/ATP2B1/ATP6V0A1/ATP6V1C2/CACNA2D1/KCNAB1/KCNG1/KCNJ13/KCNK1/KCNK5/KCNK6/KCNMB1/KCNQ5/MFSD12/MFSD2A/RHAG/RHBG/SCN3B/SEC61A1/SLC11A2/SLC16A9/SLC19A3/SLC23A2/SLC30A10/SLC31A2/SLC39A5/SLC40A1/SLC5A4/SLC5A8/SLC6A8/SLC8A3/TMEM37/TMEM63B	35	MF
GO:0046873	metal ion transmembrane transporter activity	26/363	164/7135	1.78071e-07	1.78071e-07	1.26337e-05	ASIC3/ATP1A2/ATP2A2/ATP2B1/CACNA2D1/KCNAB1/KCNG1/KCNJ13/KCNK1/KCNK5/KCNK6/KCNMB1/KCNQ5/MFSD2A/SCN3B/SEC61A1/SLC11A2/SLC23A2/SLC31A2/SLC39A5/SLC40A1/SLC5A4/SLC5A8/SLC6A8/SLC8A3/TMEM37	26	MF
GO:0022890	inorganic cation transmembrane transporter activity	31/363	239/7135	1.17399e-06	1.17399e-06	6.94096e-05	ASIC3/ATP1A2/ATP2A2/ATP2B1/ATP6V0A1/ATP6V1C2/CACNA2D1/KCNAB1/KCNG1/KCNJ13/KCNK1/KCNK5/KCNK6/KCNMB1/KCNQ5/MFSD2A/RHAG/RHBG/SCN3B/SEC61A1/SLC11A2/SLC23A2/SLC31A2/SLC39A5/SLC40A1/SLC5A4/SLC5A8/SLC6A8/SLC8A3/TMEM37/TMEM63B	31	MF
GO:0005509	calcium ion binding	30/363	257/7135	1.52082e-05	1.52082e-05	0.000770699	AOC1/ATP2A2/CALR/CASQ1/CDH1/CDH24/CLEC3B/EGFL8/F10/F12/F7/HABP2/HPCA/HRC/KCNIP2/KCNIP4/MAN1A2/MASP1/NUCB1/PADI2/PROC/RGN/S100G/STIM1/SYT12/SYT13/SYT3/THBD/THBS2/TLL2	30	MF
GO:0004252	serine-type endopeptidase activity	14/363	79/7135	3.66851e-05	3.66851e-05	0.00156189	C2/CFB/CFD/DMBT1/F10/F12/F7/FURIN/HABP2/MASP1/PROC/PRSS8/RHBDD3/ST14	14	MF
GO:0008509	anion transmembrane transporter activity	17/363	111/7135	3.96265e-05	3.96265e-05	0.00156189	ANKH/CLCN2/GABRA4/LRRC8A/MFSD12/MFSD2A/MFSD5/SLC16A1/SLC16A9/SLC23A2/SLC2A8/SLC37A2/SLC37A4/SLC52A2/SLC5A8/SLC6A8/SLCO3A1	17	MF
GO:0008236	serine-type peptidase activity	14/363	82/7135	5.64007e-05	5.64007e-05	0.00200074	C2/CFB/CFD/DMBT1/F10/F12/F7/FURIN/HABP2/MASP1/PROC/PRSS8/RHBDD3/ST14	14	MF
GO:0017171	serine hydrolase activity	14/363	83/7135	6.47689e-05	6.47689e-05	0.00208872	C2/CFB/CFD/DMBT1/F10/F12/F7/FURIN/HABP2/MASP1/PROC/PRSS8/RHBDD3/ST14	14	MF
GO:0022804	active transmembrane transporter activity	20/363	153/7135	8.70572e-05	8.70572e-05	0.00257353	ATP1A2/ATP2A2/ATP2B1/ATP6V0A1/ATP6V1C2/CYBRD1/MFSD12/MFSD2A/SLC15A2/SLC23A2/SLC37A2/SLC37A4/SLC5A4/SLC5A8/SLC6A14/SLC6A8/SLC8A3/SLCO3A1/TAP1/TAP2	20	MF
GO:0008514	organic anion transmembrane transporter activity	11/363	56/7135	9.55986e-05	9.55986e-05	0.00260864	LRRC8A/MFSD12/MFSD2A/SLC16A1/SLC16A9/SLC23A2/SLC2A8/SLC52A2/SLC5A8/SLC6A8/SLCO3A1	11	MF
GO:0030246	carbohydrate binding	16/363	112/7135	0.000155897	0.000155897	0.00395016	BCAN/BSG/CALR/CLEC1A/CLEC3B/CNTN1/GALNT15/GUSB/LOC106507519/MLEC/OGFOD3/P3H3/REG4/SELP/SFTPD/SLC2A8	16	MF
GO:0008233	peptidase activity	30/363	294/7135	0.000189445	0.000189445	0.00427925	BACE2/C2/CASP10/CFB/CFD/CPE/CTSF/CTSL/CTSZ/DMBT1/ERMP1/F10/F12/F7/FOLH1B/FURIN/GGT1/HABP2/MASP1/MMP16/PGPEP1L/PROC/PRSS8/PSMB7/RHBDD3/SPPL2B/ST14/TIMP2/TLL2/UCHL1	30	MF
GO:0015081	sodium ion transmembrane transporter activity	10/363	51/7135	0.000201611	0.000201611	0.00427925	ASIC3/ATP1A2/KCNK1/MFSD2A/SCN3B/SLC23A2/SLC5A4/SLC5A8/SLC6A8/SLC8A3	10	MF
GO:0004175	endopeptidase activity	22/363	188/7135	0.000205074	0.000205074	0.00427925	BACE2/C2/CASP10/CFB/CFD/CTSZ/DMBT1/F10/F12/F7/FURIN/HABP2/MASP1/MMP16/PROC/PRSS8/PSMB7/RHBDD3/SPPL2B/ST14/TLL2/UCHL1	22	MF
GO:0015267	channel activity	22/363	194/7135	0.000321847	0.000321847	0.00600899	AQP7/AQP8/ASIC3/CACNA2D1/CLCN2/GABRA4/GJB1/KCNAB1/KCNG1/KCNJ13/KCNK1/KCNK5/KCNK6/KCNMB1/KCNQ5/LRRC8A/RHAG/RHBG/SCN3B/SEC61A1/TMEM37/TMEM63B	22	MF
GO:0022803	passive transmembrane transporter activity	22/363	194/7135	0.000321847	0.000321847	0.00600899	AQP7/AQP8/ASIC3/CACNA2D1/CLCN2/GABRA4/GJB1/KCNAB1/KCNG1/KCNJ13/KCNK1/KCNK5/KCNK6/KCNMB1/KCNQ5/LRRC8A/RHAG/RHBG/SCN3B/SEC61A1/TMEM37/TMEM63B	22	MF
GO:0005539	glycosaminoglycan binding	11/363	67/7135	0.000498953	0.000498953	0.00884985	ANG/AOC1/APOE/BCAN/CLEC3B/FURIN/HBEGF/HYAL2/LRPAP1/REG4/THBS2	11	MF
GO:0005261	cation channel activity	16/363	126/7135	0.000609842	0.000609842	0.0103016	ASIC3/CACNA2D1/KCNAB1/KCNG1/KCNJ13/KCNK1/KCNK5/KCNK6/KCNMB1/KCNQ5/RHAG/RHBG/SCN3B/SEC61A1/TMEM37/TMEM63B	16	MF
GO:0022853	active ion transmembrane transporter activity	14/363	103/7135	0.000667717	0.000667717	0.0107665	ATP1A2/ATP2A2/ATP2B1/ATP6V0A1/ATP6V1C2/MFSD2A/SLC23A2/SLC37A2/SLC37A4/SLC5A4/SLC5A8/SLC6A8/SLC8A3/SLCO3A1	14	MF
GO:0015144	carbohydrate transmembrane transporter activity	5/363	16/7135	0.000908789	0.000908789	0.0134325	AQP7/SLC23A2/SLC2A4/SLC2A8/SLC5A4	5	MF
GO:0015605	organophosphate ester transmembrane transporter activity	5/363	16/7135	0.000908789	0.000908789	0.0134325	LRRC8A/MFSD2A/SLC25A53/SLC37A2/SLC37A4	5	MF
GO:1901505	carbohydrate derivative transmembrane transporter activity	6/363	24/7135	0.00102467	0.00102467	0.0145395	LRRC8A/MFSD2A/SLC17A5/SLC29A3/SLC37A2/SLC37A4	6	MF
GO:0005216	ion channel activity	19/363	172/7135	0.00112132	0.00112132	0.015299	ASIC3/CACNA2D1/CLCN2/GABRA4/KCNAB1/KCNG1/KCNJ13/KCNK1/KCNK5/KCNK6/KCNMB1/KCNQ5/LRRC8A/RHAG/RHBG/SCN3B/SEC61A1/TMEM37/TMEM63B	19	MF
GO:0008201	heparin binding	9/363	53/7135	0.00125203	0.00125203	0.0164496	ANG/AOC1/APOE/CLEC3B/FURIN/HBEGF/LRPAP1/REG4/THBS2	9	MF
GO:0090482	vitamin transmembrane transporter activity	4/363	11/7135	0.00163453	0.00163453	0.0207081	SLC19A3/SLC23A2/SLC2A8/SLC52A2	4	MF
GO:0015291	secondary active transmembrane transporter activity	12/363	90/7135	0.00188737	0.00188737	0.0230869	MFSD12/MFSD2A/SLC15A2/SLC23A2/SLC37A2/SLC37A4/SLC5A4/SLC5A8/SLC6A14/SLC6A8/SLC8A3/SLCO3A1	12	MF
GO:0008374	O-acyltransferase activity	6/363	27/7135	0.00198009	0.00198009	0.0234137	AGPAT3/GPAT3/LRAT/MBOAT7/MOGAT2/SOAT1	6	MF
GO:0005244	voltage-gated ion channel activity	10/363	69/7135	0.00237461	0.00237461	0.027173	CACNA2D1/CLCN2/KCNAB1/KCNG1/KCNJ13/KCNK1/KCNK5/KCNQ5/SCN3B/TMEM37	10	MF
GO:0022832	voltage-gated channel activity	10/363	70/7135	0.00264826	0.00264826	0.0293573	CACNA2D1/CLCN2/KCNAB1/KCNG1/KCNJ13/KCNK1/KCNK5/KCNQ5/SCN3B/TMEM37	10	MF
GO:0008194	UDP-glycosyltransferase activity	9/363	61/7135	0.00342476	0.00342476	0.0358439	B3GALT4/B3GAT2/B3GNT8/B4GALT1/GALNT15/GCNT7/LOC100152566/UGCG/UGT2B31	9	MF
GO:0016491	oxidoreductase activity	32/363	382/7135	0.00343549	0.00343549	0.0358439	ADH4/AKR1C1/AOC1/BCO1/BLVRB/CYBA/CYBRD1/CYP1A1/CYP2C42/CYP3A29/CYP3A46/DHCR24/DIO1/FADS3/FRRS1/GPD1/GSTK1/HSD11B1/IL4I1/IYD/KCNAB1/LOC100622246/MSRB1/OGFOD3/P3H3/POR/PTGIS/RETSAT/SDR16C5/SOD3/STEAP3/VKORC1L1	32	MF
GO:0022836	gated channel activity	14/363	123/7135	0.00372712	0.00372712	0.0371141	ASIC3/CACNA2D1/CLCN2/GABRA4/KCNAB1/KCNG1/KCNJ13/KCNK1/KCNK5/KCNMB1/KCNQ5/SCN3B/TMEM37/TMEM63B	14	MF
GO:0005267	potassium channel activity	8/363	51/7135	0.0038711	0.0038711	0.0371141	KCNAB1/KCNG1/KCNJ13/KCNK1/KCNK5/KCNK6/KCNMB1/KCNQ5	8	MF
GO:0015293	symporter activity	8/363	51/7135	0.0038711	0.0038711	0.0371141	MFSD12/MFSD2A/SLC15A2/SLC23A2/SLC5A4/SLC5A8/SLC6A14/SLC6A8	8	MF
GO:0016758	hexosyltransferase activity	11/363	86/7135	0.00400462	0.00400462	0.0373839	B3GALT4/B3GAT2/B3GNT8/B4GALT1/GALNT15/GCNT7/LOC100152566/LOC100513844/PIGV/UGCG/UGT2B31	11	MF
GO:0042626	ATPase-coupled transmembrane transporter activity	7/363	41/7135	0.00417909	0.00417909	0.0379118	ATP1A2/ATP2A2/ATP2B1/ATP6V0A1/ATP6V1C2/TAP1/TAP2	7	MF
GO:0015079	potassium ion transmembrane transporter activity	9/363	63/7135	0.00427492	0.00427492	0.0379118	ATP1A2/KCNAB1/KCNG1/KCNJ13/KCNK1/KCNK5/KCNK6/KCNMB1/KCNQ5	9	MF
GO:0042887	amide transmembrane transporter activity	4/363	15/7135	0.00574975	0.00574975	0.0495071	AQP7/SLC15A2/TAP1/TAP2	4	MF
GO:1901681	sulfur compound binding	10/363	78/7135	0.00586152	0.00586152	0.0495071	ANG/AOC1/APOE/CLEC3B/FURIN/HBEGF/LRPAP1/REG4/SOAT1/THBS2	10	MF
GO:0005179	hormone activity	10/363	83/7135	0.00905548	0.00905548	0.074705	CCK/EDN3/GAST/GHRL/GIP/MLN/RETN/SCT/SST/VIP	10	MF
GO:0019199	transmembrane receptor protein kinase activity	6/363	37/7135	0.0101346	0.0101346	0.0817073	ACVR1B/ACVR1C/EPHA3/EPHB3/MET/TYRO3	6	MF
GO:0015370	solute:sodium symporter activity	5/363	27/7135	0.010595	0.010595	0.0835209	MFSD2A/SLC23A2/SLC5A4/SLC5A8/SLC6A8	5	MF
GO:0030215	semaphorin receptor binding	3/363	10/7135	0.0119921	0.0119921	0.0898764	SEMA4F/SEMA6A/SEMA6C	3	MF
GO:0140358	P-type transmembrane transporter activity	3/363	10/7135	0.0119921	0.0119921	0.0898764	ATP1A2/ATP2A2/ATP2B1	3	MF
GO:0019829	ATPase-coupled cation transmembrane transporter activity	5/363	28/7135	0.0123735	0.0123735	0.0898764	ATP1A2/ATP2A2/ATP2B1/ATP6V0A1/ATP6V1C2	5	MF
GO:0015399	primary active transmembrane transporter activity	8/363	62/7135	0.012668	0.012668	0.0898764	ATP1A2/ATP2A2/ATP2B1/ATP6V0A1/ATP6V1C2/CYBRD1/TAP1/TAP2	8	MF
GO:0019955	cytokine binding	8/363	62/7135	0.012668	0.012668	0.0898764	CCR10/CCRL2/CD74/CHRDL1/HYAL2/IL6R/SOSTDC1/TSKU	8	MF
GO:0015085	calcium ion transmembrane transporter activity	6/363	40/7135	0.0147296	0.0147296	0.102454	ATP2A2/ATP2B1/CACNA2D1/SEC61A1/SLC8A3/TMEM37	6	MF
GO:0016757	glycosyltransferase activity	13/363	131/7135	0.0155366	0.0155366	0.104294	B3GALT4/B3GAT2/B3GNT8/B4GALT1/DPAGT1/GALNT15/GCNT7/LOC100152566/LOC100513844/PIGV/ST6GALNAC4/UGCG/UGT2B31	13	MF
GO:0001618	virus receptor activity	3/363	11/7135	0.0158762	0.0158762	0.104294	HYAL2/SLC52A2/TYRO3	3	MF
GO:0140272	exogenous protein binding	3/363	11/7135	0.0158762	0.0158762	0.104294	HYAL2/SLC52A2/TYRO3	3	MF
GO:0022843	voltage-gated cation channel activity	7/363	53/7135	0.0170292	0.0170292	0.109834	CACNA2D1/KCNAB1/KCNG1/KCNJ13/KCNK1/KCNK5/KCNQ5	7	MF
GO:0005249	voltage-gated potassium channel activity	6/363	42/7135	0.0184945	0.0184945	0.113115	KCNAB1/KCNG1/KCNJ13/KCNK1/KCNK5/KCNQ5	6	MF
GO:0005496	steroid binding	6/363	42/7135	0.0184945	0.0184945	0.113115	APOA4/GPER1/S100G/SOAT1/STARD3/VDR	6	MF
GO:0019838	growth factor binding	6/363	42/7135	0.0184945	0.0184945	0.113115	ACVR1C/CHRDL1/FURIN/HYAL2/IL6R/TSKU	6	MF
GO:0015932	nucleobase-containing compound transmembrane transporter activity	4/363	21/7135	0.0198166	0.0198166	0.119147	LRRC8A/SIDT2/SLC25A53/SLC29A3	4	MF
GO:0050431	transforming growth factor beta binding	3/363	12/7135	0.0203835	0.0203835	0.120513	CHRDL1/HYAL2/TSKU	3	MF
GO:0008028	monocarboxylic acid transmembrane transporter activity	4/363	22/7135	0.0232742	0.0232742	0.135348	MFSD2A/SLC16A1/SLC16A9/SLC5A8	4	MF
GO:0005272	sodium channel activity	3/363	13/7135	0.025519	0.025519	0.143691	ASIC3/KCNK1/SCN3B	3	MF
GO:0022884	macromolecule transmembrane transporter activity	3/363	13/7135	0.025519	0.025519	0.143691	SEC61A1/SEC61A2/SIDT2	3	MF
GO:0016860	intramolecular oxidoreductase activity	4/363	23/7135	0.0270756	0.0270756	0.150074	EBP/PDIA3/PTGDS/PTGIS	4	MF
GO:0004867	serine-type endopeptidase inhibitor activity	6/363	47/7135	0.030655	0.030655	0.167299	FURIN/SERPINA1/SPINK1/SPINK4/SPINT1/SPINT2	6	MF
GO:0061135	endopeptidase regulator activity	9/363	87/7135	0.0320328	0.0320328	0.17217	C3/FURIN/SERPINA1/SFRP2/SPINK1/SPINK4/SPINT1/SPINT2/TIMP2	9	MF
GO:0001664	G protein-coupled receptor binding	12/363	131/7135	0.0341472	0.0341472	0.180795	C3/CCL20/CCL21/CCL25/CCRL2/EDN3/GHRL/MLN/P2RY2/SCT/TAC1/UCHL1	12	MF
GO:0004714	transmembrane receptor protein tyrosine kinase activity	4/363	25/7135	0.035731	0.035731	0.186399	EPHA3/EPHB3/MET/TYRO3	4	MF
GO:0048020	CCR chemokine receptor binding	3/363	15/7135	0.0376642	0.0376642	0.193636	CCL21/CCL25/CCRL2	3	MF
GO:0050839	cell adhesion molecule binding	8/363	77/7135	0.0410308	0.0410308	0.207931	CALR/CDH24/CNTN1/CPE/ESAM/ISG15/JAML/NECTIN2	8	MF
GO:0015294	solute:cation symporter activity	5/363	38/7135	0.0418592	0.0418592	0.209141	MFSD2A/SLC23A2/SLC5A4/SLC5A8/SLC6A8	5	MF
GO:0015103	inorganic anion transmembrane transporter activity	7/363	64/7135	0.0428247	0.0428247	0.210993	ANKH/CLCN2/GABRA4/LRRC8A/MFSD5/SLC37A2/SLC37A4	7	MF
GO:0042277	peptide binding	9/363	92/7135	0.0435879	0.0435879	0.211625	ANG/APOE/DHCR24/FURIN/ITM2A/SEC61A1/SEC61A2/SLC40A1/SSTR1	9	MF
GO:0016712	oxidoreductase activity, acting on paired donors, with incorporation or reduction of molecular oxygen, reduced flavin or flavoprotein as one donor, and incorporation of one atom of oxygen	3/363	16/7135	0.0446567	0.0446567	0.211625	CYP1A1/CYP3A29/CYP3A46	3	MF
GO:0016746	acyltransferase activity	11/363	122/7135	0.0456755	0.0456755	0.211625	AGPAT3/ELOVL1/GGT1/GPAT3/LPCAT3/LPGAT1/LRAT/MBOAT7/MOGAT2/NAT8/SOAT1	11	MF
GO:0000149	SNARE binding	4/363	27/7135	0.045808	0.045808	0.211625	SYT12/SYT13/SYT3/VPS18	4	MF
GO:0004553	hydrolase activity, hydrolyzing O-glycosyl compounds	5/363	39/7135	0.0460939	0.0460939	0.211625	GUSB/HEXA/HYAL2/LCTL/MAN1A2	5	MF
GO:0004713	protein tyrosine kinase activity	6/363	52/7135	0.0471289	0.0471289	0.211625	EPHA3/EPHB3/FRK/JAK3/MET/TYRO3	6	MF
GO:0046943	carboxylic acid transmembrane transporter activity	6/363	52/7135	0.0471289	0.0471289	0.211625	MFSD12/MFSD2A/SLC16A1/SLC16A9/SLC23A2/SLC5A8	6	MF

## Sheet: Sheet1
ID	Description	GeneRatio	BgRatio	pvalue	p.adjust	qvalue	geneID	Count	Ont
GO:0047496	vesicle transport along microtubule	6/454	11/6899	2.73284e-05	2.73284e-05	0.0423284	BLOC1S3/BLOC1S5/BLOC1S6/FYCO1/RAB1A/SNAPIN	6	BP
GO:0042773	ATP synthesis coupled electron transport	12/454	47/6899	3.58151e-05	3.58151e-05	0.0423284	CHCHD2/COX1/COX2/COX3/CYTB/ND1/ND2/ND3/ND4/ND4L/ND5/ND6	12	BP
GO:0072384	organelle transport along microtubule	8/454	22/6899	4.64699e-05	4.64699e-05	0.0423284	BLOC1S3/BLOC1S5/BLOC1S6/FYCO1/MAP1B/RAB1A/SNAPIN/UBB	8	BP
GO:0022900	electron transport chain	13/454	59/6899	9.03721e-05	9.03721e-05	0.0617384	CHCHD2/COX1/COX2/COX3/CYTB/ND1/ND2/ND3/ND4/ND4L/ND5/ND6/THAP11	13	BP
GO:0009060	aerobic respiration	15/454	77/6899	0.000118796	0.000118796	0.0649253	CHCHD2/COX1/COX2/COX3/CS/CYTB/IDH3A/ND1/ND2/ND3/ND4/ND4L/ND5/ND6/TRPV4	15	BP
GO:0022904	respiratory electron transport chain	12/454	55/6899	0.0001856	0.0001856	0.0810095	CHCHD2/COX1/COX2/COX3/CYTB/ND1/ND2/ND3/ND4/ND4L/ND5/ND6	12	BP
GO:0033993	response to lipid	26/454	187/6899	0.000207517	0.000207517	0.0810095	AMCF-II/ANXA1/AQP3/CASP9/CCL2/CEBPB/CHMP5/CTNNB1/CXCL10/CXCL9/DUSP10/FOXA1/HEYL/HMGB2/IL10/KLF9/LY96/MGST1/PDCD4/PID1/PLSCR4/SLPI/SNAI2/TAF7/TBX2/TNIP3	26	BP
GO:0032496	response to lipopolysaccharide	14/454	75/6899	0.000318368	0.000318368	0.091417	AMCF-II/CCL2/CEBPB/CHMP5/CXCL10/CXCL9/DUSP10/HMGB2/IL10/LY96/PDCD4/PLSCR4/SLPI/TNIP3	14	BP
GO:0015980	energy derivation by oxidation of organic compounds	19/454	122/6899	0.000349928	0.000349928	0.091417	ACADM/CHCHD2/COX1/COX2/COX3/CS/CYTB/IDH3A/ND1/ND2/ND3/ND4/ND4L/ND5/ND6/PPP1CB/PPP1CC/TRPV4/UGP2	19	BP
GO:0006120	mitochondrial electron transport, NADH to ubiquinone	6/454	16/6899	0.000356497	0.000356497	0.091417	ND1/ND2/ND3/ND4/ND5/ND6	6	BP
GO:0042775	mitochondrial ATP synthesis coupled electron transport	10/454	43/6899	0.000367992	0.000367992	0.091417	CHCHD2/COX1/COX3/CYTB/ND1/ND2/ND3/ND4/ND5/ND6	10	BP
GO:0006119	oxidative phosphorylation	12/454	60/6899	0.0004382	0.0004382	0.0997866	CHCHD2/COX1/COX2/COX3/CYTB/ND1/ND2/ND3/ND4/ND4L/ND5/ND6	12	BP
GO:0006091	generation of precursor metabolites and energy	23/454	166/6899	0.000502231	0.000502231	0.10557	ACADM/CHCHD2/COX1/COX2/COX3/CS/CYTB/IDH3A/ND1/ND2/ND3/ND4/ND4L/ND5/ND6/OXCT1/PGK1/PPP1CB/PPP1CC/RPIA/THAP11/TRPV4/UGP2	23	BP
GO:0043473	pigmentation	8/454	31/6899	0.000677294	0.000677294	0.118625	BLOC1S3/BLOC1S5/BLOC1S6/DCT/RAB11A/RAB32/SNAI2/TBX2	8	BP
GO:0045333	cellular respiration	15/454	90/6899	0.000699285	0.000699285	0.118625	CHCHD2/COX1/COX2/COX3/CS/CYTB/IDH3A/ND1/ND2/ND3/ND4/ND4L/ND5/ND6/TRPV4	15	BP
GO:0002237	response to molecule of bacterial origin	14/454	81/6899	0.000719856	0.000719856	0.118625	AMCF-II/CCL2/CEBPB/CHMP5/CXCL10/CXCL9/DUSP10/HMGB2/IL10/LY96/PDCD4/PLSCR4/SLPI/TNIP3	14	BP
GO:0099518	vesicle cytoskeletal trafficking	6/454	18/6899	0.000737982	0.000737982	0.118625	BLOC1S3/BLOC1S5/BLOC1S6/FYCO1/RAB1A/SNAPIN	6	BP
GO:0002682	regulation of immune system process	44/454	414/6899	0.000917895	0.000917895	0.134093	ADAM10/ANXA1/APPL1/AQP3/ATG12/BLOC1S6/BMI1/C1S/C7/CASP8/CCL2/CD1D/CD200/CEBPB/CXCL10/DUSP10/EVI2B/HOXB8/IGF2/IL10/LEO1/LOC100520491/LOX/LSM14A/LY96/MAPKAPK3/MS4A2/MTURN/MYD88/P2RY12/PLSCR1/PRDM1/PSMA1/RAB7B/RHOG/SIT1/SLA-DMB/STAT1/STAT3/TFRC/TIFA/TLR10/TLR3/TRPV4	44	BP
GO:0019646	aerobic electron transport chain	9/454	40/6899	0.00093235	0.00093235	0.134093	COX1/COX3/CYTB/ND1/ND2/ND3/ND4/ND5/ND6	9	BP
GO:1901700	response to oxygen-containing compound	41/454	381/6899	0.00107517	0.00107517	0.137242	AMCF-II/APPL1/AQP3/CASP9/CCL2/CEBPB/CHMP5/CTNNB1/CXCL10/CXCL9/DUSP10/FOXA1/GCG/GNA11/GNA14/GPX1/GRB2/HMGB2/IGF2/IL10/KLF9/LPL/LY96/MGST1/OXR1/P2RY12/PDCD4/PID1/PIP4K2A/PLSCR4/RGS10/RHOQ/RRAGA/SLC1A1/SLPI/SNAI2/STAT1/STAT3/TBX2/TNIP3/TRPV4	41	BP
GO:0045597	positive regulation of cell differentiation	28/454	230/6899	0.00107837	0.00107837	0.137242	ANXA1/ARPC2/BAMBI/BEND6/BLOC1S5/BLOC1S6/BMPR2/CASP8/CDC42/CEBPB/CTNNB1/CXCL9/DCT/DUSP10/EVI2B/FOXA1/HEYL/IL10/MAML1/MEDAG/MTURN/MYOCD/PROX1/RAB7B/SAV1/STAT1/STAT3/ZBED2	28	BP
GO:0030833	regulation of actin filament polymerization	10/454	49/6899	0.00110492	0.00110492	0.137242	ARPC2/ARPC5/ARPC5L/CAPZA1/CAPZA2/GRB2/PFN2/RASA1/RDX/TMOD3	10	BP
GO:0009719	response to endogenous stimulus	41/454	386/6899	0.00138606	0.00138606	0.164678	ANXA1/APPL1/BAMBI/BMP5/BMPR2/CASP9/CCL2/CEBPB/CHMP5/CTNNB1/FGF21/FGF9/FOXA1/GNA14/GRB2/HEYL/HMGB2/HPGD/IGF2/IL10/ING2/KLF9/LMO2/LOX/P2RY12/PDCD4/PID1/PIP4K2A/RASL11B/RERG/RHOQ/RRAGA/SLC1A1/SMAD3/SMAD9/SNAI2/STAT1/STAT3/TAF7/TBX2/TRPV4	41	BP
GO:0033059	cellular pigmentation	5/454	14/6899	0.00146938	0.00146938	0.167303	BLOC1S3/BLOC1S5/BLOC1S6/RAB11A/RAB32	5	BP
GO:0071495	cellular response to endogenous stimulus	37/454	340/6899	0.0015335	0.0015335	0.16762	ANXA1/APPL1/BAMBI/BMP5/BMPR2/CASP9/CCL2/CEBPB/CHMP5/CTNNB1/FGF21/FGF9/FOXA1/GNA14/GRB2/HEYL/HPGD/IGF2/ING2/KLF9/LMO2/LOX/P2RY12/PDCD4/PID1/PIP4K2A/RASL11B/RHOQ/RRAGA/SLC1A1/SMAD3/SMAD9/SNAI2/STAT1/STAT3/TAF7/TBX2	37	BP
GO:0042127	regulation of cell population proliferation	48/454	476/6899	0.00168631	0.00168631	0.169297	ADAM10/ANXA1/APC/BAMBI/BMI1/BMP5/BMPR2/CCL2/CD1D/CDCA7L/CDKN2C/CEBPB/CHEK1/CNOT8/CTNNB1/CXCL10/CXCL9/DCT/DUSP10/EAPP/EGFR/FGF21/FGF9/GRK5/HMGB2/IGF2/IL10/ING2/KLF9/LOC100520491/MAP3K3/NRAS/OSR2/PDCD4/PID1/PRDM1/PROX1/PTEN/RERG/RPRD1B/SAV1/SLC25A5/SNAI2/STAT1/STAT3/TBX2/TFRC/TOB1	48	BP
GO:0071396	cellular response to lipid	19/454	139/6899	0.00178037	0.00178037	0.169297	AMCF-II/ANXA1/CASP9/CCL2/CHMP5/CXCL10/CXCL9/FOXA1/HEYL/IL10/KLF9/LY96/MGST1/PDCD4/PID1/PLSCR4/SNAI2/TAF7/TNIP3	19	BP
GO:0051301	cell division	22/454	171/6899	0.00178677	0.00178677	0.169297	ANAPC10/APC/BMI1/CCNG1/CDC42/CDCA7L/CHMP2B/CHMP5/DCT/EPB41/EVI2B/FGF9/IGF2/ING2/PARD6G/PMF1/PPP1CB/PPP1CC/RAB11A/SGO2/TOP2A/TXNIP	22	BP
GO:0060840	artery development	7/454	28/6899	0.00179666	0.00179666	0.169297	AP2B1/BMPR2/HPGD/LOX/PRDM1/PROX1/TBX2	7	BP
GO:0045595	regulation of cell differentiation	43/454	418/6899	0.00200172	0.00200172	0.182332	ANXA1/AP1AR/ARPC2/BAMBI/BEND6/BLOC1S5/BLOC1S6/BMPR2/CASP8/CDC42/CEBPB/CTNNB1/CXCL10/CXCL9/DCT/DUSP10/EVI2B/FGF9/FOXA1/HEYL/HMGB2/HOXB8/IGF2/IL10/LEO1/LOX/LSM1/MAML1/MEDAG/MTURN/MYOCD/PDCD4/PRDM1/PROX1/RAB7B/RFLNB/SAV1/SNAI2/STAT1/STAT3/TRPV4/ZBED2/ZFPM2	43	BP
GO:0071216	cellular response to biotic stimulus	12/454	71/6899	0.00207346	0.00207346	0.182774	AMCF-II/CCL2/CHMP5/CXCL10/CXCL9/IL10/LY96/PDCD4/PLSCR4/TMCO1/TNIP3/TXNIP	12	BP
GO:0008360	regulation of cell shape	9/454	45/6899	0.00225348	0.00225348	0.192435	ANXA1/BAMBI/CCL2/HEXB/LOC733637/MRLC2/RDX/RHOG/RHOQ	9	BP
GO:0030041	actin filament polymerization	10/454	54/6899	0.00239427	0.00239427	0.198262	ARPC2/ARPC5/ARPC5L/CAPZA1/CAPZA2/GRB2/PFN2/RASA1/RDX/TMOD3	10	BP
GO:0008064	regulation of actin polymerization or depolymerization	10/454	55/6899	0.00275869	0.00275869	0.207623	ARPC2/ARPC5/ARPC5L/CAPZA1/CAPZA2/GRB2/PFN2/RASA1/RDX/TMOD3	10	BP
GO:0030832	regulation of actin filament length	10/454	55/6899	0.00275869	0.00275869	0.207623	ARPC2/ARPC5/ARPC5L/CAPZA1/CAPZA2/GRB2/PFN2/RASA1/RDX/TMOD3	10	BP
GO:1901701	cellular response to oxygen-containing compound	32/454	292/6899	0.002816	0.002816	0.207623	AMCF-II/APPL1/CASP9/CCL2/CEBPB/CHMP5/CTNNB1/CXCL10/CXCL9/GCG/GNA11/GNA14/GRB2/IGF2/IL10/KLF9/LY96/MGST1/OXR1/P2RY12/PDCD4/PID1/PIP4K2A/PLSCR4/RGS10/RHOQ/RRAGA/SLC1A1/SNAI2/STAT1/STAT3/TNIP3	32	BP
GO:0007010	cytoskeleton organization	44/454	438/6899	0.00282108	0.00282108	0.207623	ANXA1/AP1AR/APC/ARPC2/ARPC5/ARPC5L/CAPZA1/CAPZA2/CCDC8/CCL2/CDC42/CHEK1/CHMP2B/CHMP5/CHORDC1/CNN3/CTNNB1/DCTN6/EPB41/GRB2/LSM14A/MAD2L1/MAP1B/MEF2A/PARD6G/PFN2/PLEK/PROX1/RAB11A/RAP2B/RASA1/RDX/RFLNB/RHOG/RHOQ/RNF4/SDCBP/SMTNL2/SPEF2/TMOD3/TRPV4/TTL/TUBA1B/TUBE1	44	BP
GO:0051254	positive regulation of RNA metabolic process	45/454	451/6899	0.00288721	0.00288721	0.207623	BAMBI/BMP5/BMPR2/CEBPB/CHCHD2/CNOT8/CTNNB1/DIMT1/EAPP/FHL5/FOXA1/HEXB/HMGB2/IGF2/IL10/ING2/LEO1/LMO2/LSM1/MAML1/MDFIC/MED30/MEF2A/MSL3/MYOCD/NCOA3/NFIL3/NR2C2/PID1/PLSCR1/PRDX6/PROX1/RHOQ/RIDA/RNF4/RPRD1B/SLC30A9/STAT1/STAT3/TAF7/TBX2/TFAM/TOP2A/ZFP36L2/ZFPM2	45	BP
GO:0071222	cellular response to lipopolysaccharide	10/454	56/6899	0.00316615	0.00316615	0.221844	AMCF-II/CCL2/CHMP5/CXCL10/CXCL9/IL10/LY96/PDCD4/PLSCR4/TNIP3	10	BP
GO:0046907	intracellular transport	46/454	467/6899	0.0033416	0.0033416	0.225924	AP1AR/AP1S2/AP2B1/AP2M1/APPL1/ARF4/ARL4D/BLOC1S3/BLOC1S5/BLOC1S6/CHMP2B/CHMP5/CLTC/COPB2/DENND2A/FGF9/FYCO1/HIKESHI/HNRNPA2B1/INPP5F/KPNA1/MAP1B/NXT2/PIP4K2A/RAB11A/RAB1A/RAB32/RAB35/RAB7B/RDX/SEC24C/SLC1A1/SLC25A5/SNAPIN/SNX27/SRP54/SRP9/STAT3/STRADB/STX11/STYX/TBC1D20/TOMM22/TRPV4/TXNIP/UBB	46	BP
GO:1990868	response to chemokine	6/454	24/6899	0.00381703	0.00381703	0.225924	AMCF-II/CCL2/CCL8/CXCL10/CXCL9/LOX	6	BP
GO:1990869	cellular response to chemokine	6/454	24/6899	0.00381703	0.00381703	0.225924	AMCF-II/CCL2/CCL8/CXCL10/CXCL9/LOX	6	BP
GO:0035904	aorta development	5/454	17/6899	0.00385227	0.00385227	0.225924	AP2B1/LOX/PRDM1/PROX1/TBX2	5	BP
GO:0003279	cardiac septum development	8/454	40/6899	0.00391685	0.00391685	0.225924	AP2B1/BMPR2/HEYL/MAML1/PRDM1/PROX1/SAV1/TBX2	8	BP
GO:0010970	transport along microtubule	8/454	40/6899	0.00391685	0.00391685	0.225924	BLOC1S3/BLOC1S5/BLOC1S6/FYCO1/MAP1B/RAB1A/SNAPIN/UBB	8	BP
GO:0044106	cellular amine metabolic process	8/454	40/6899	0.00391685	0.00391685	0.225924	ALDH2/AMD1/HNMT/IDO1/OAZ2/RNF180/SLC1A1/SLC7A7	8	BP
GO:0051094	positive regulation of developmental process	37/454	359/6899	0.00394331	0.00394331	0.225924	ANXA1/ARPC2/BAMBI/BEND6/BLOC1S5/BLOC1S6/BMP5/BMPR2/CASP8/CDC42/CEBPB/CHI3L1/CTNNB1/CXCL9/DCT/DUSP10/EVI2B/FGF9/FOXA1/HEYL/IL10/MAML1/MAPK6/MEDAG/MTURN/MYOCD/NR2C2/OSR2/PROX1/RAB7B/SAV1/STAT1/STAT3/TBX2/TFRC/WNT2B/ZBED2	37	BP
GO:0030323	respiratory tube development	11/454	67/6899	0.00396846	0.00396846	0.225924	BMPR2/CHI3L1/FGF9/FOXA1/HIKESHI/LOX/PROX1/SAV1/TBX2/TULP3/WNT2B	11	BP
GO:0051650	establishment of vesicle localization	8/454	41/6899	0.00459332	0.00459332	0.251037	AP1AR/BLOC1S3/BLOC1S5/BLOC1S6/FYCO1/RAB11A/RAB1A/SNAPIN	8	BP
GO:0097530	granulocyte migration	8/454	41/6899	0.00459332	0.00459332	0.251037	AMCF-II/ANXA1/CCL2/CCL8/CXCL10/CXCL9/RHOG/TRPV4	8	BP
GO:0071219	cellular response to molecule of bacterial origin	10/454	60/6899	0.00529792	0.00529792	0.281462	AMCF-II/CCL2/CHMP5/CXCL10/CXCL9/IL10/LY96/PDCD4/PLSCR4/TNIP3	10	BP
GO:0009308	amine metabolic process	8/454	42/6899	0.00535601	0.00535601	0.281462	ALDH2/AMD1/HNMT/IDO1/OAZ2/RNF180/SLC1A1/SLC7A7	8	BP
GO:0022604	regulation of cell morphogenesis	12/454	80/6899	0.0057046	0.0057046	0.2933	ANXA1/AP1AR/ARPC2/BAMBI/CCL2/CDC42/HEXB/LOC733637/MRLC2/RDX/RHOG/RHOQ	12	BP
GO:0006576	cellular biogenic amine metabolic process	7/454	34/6899	0.00579594	0.00579594	0.2933	ALDH2/AMD1/HNMT/IDO1/OAZ2/RNF180/SLC1A1	7	BP
GO:0043244	regulation of protein-containing complex disassembly	8/454	43/6899	0.00621171	0.00621171	0.297294	APC/ATG12/CAPZA1/CAPZA2/FYCO1/MAP1B/RDX/TMOD3	8	BP
GO:0051648	vesicle localization	8/454	43/6899	0.00621171	0.00621171	0.297294	AP1AR/BLOC1S3/BLOC1S5/BLOC1S6/FYCO1/RAB11A/RAB1A/SNAPIN	8	BP
GO:0030036	actin cytoskeleton organization	25/454	224/6899	0.00625352	0.00625352	0.297294	ANXA1/AP1AR/ARPC2/ARPC5/ARPC5L/CAPZA1/CAPZA2/CDC42/CNN3/EPB41/GRB2/MEF2A/PFN2/PLEK/PROX1/RAP2B/RASA1/RDX/RFLNB/RHOG/RHOQ/SDCBP/SMTNL2/TMOD3/TRPV4	25	BP
GO:0032984	protein-containing complex disassembly	12/454	81/6899	0.00631005	0.00631005	0.297294	APC/ATG12/CAPZA1/CAPZA2/CHMP2B/CHMP5/FYCO1/MAP1B/MTRF1/RDX/SNAPIN/TMOD3	12	BP
GO:1903706	regulation of hemopoiesis	14/454	102/6899	0.00662223	0.00662223	0.306714	ANXA1/CASP8/CEBPB/DUSP10/EVI2B/HOXB8/IL10/LEO1/LOX/MTURN/PRDM1/RAB7B/STAT1/STAT3	14	BP
GO:0045637	regulation of myeloid cell differentiation	10/454	63/6899	0.00753084	0.00753084	0.342983	CASP8/CEBPB/EVI2B/HOXB8/LEO1/LOX/MTURN/RAB7B/STAT1/STAT3	10	BP
GO:0060541	respiratory system development	11/454	73/6899	0.00770603	0.00770603	0.345209	BMPR2/CHI3L1/FGF9/FOXA1/HIKESHI/LOX/PROX1/SAV1/TBX2/TULP3/WNT2B	11	BP
GO:0048844	artery morphogenesis	5/454	20/6899	0.00819405	0.00819405	0.35387	BMPR2/HPGD/PRDM1/PROX1/TBX2	5	BP
GO:0008089	anterograde axonal transport	4/454	13/6899	0.00820995	0.00820995	0.35387	BLOC1S3/BLOC1S5/BLOC1S6/SNAPIN	4	BP
GO:0008154	actin polymerization or depolymerization	10/454	64/6899	0.00841736	0.00841736	0.35387	ARPC2/ARPC5/ARPC5L/CAPZA1/CAPZA2/GRB2/PFN2/RASA1/RDX/TMOD3	10	BP
GO:0032271	regulation of protein polymerization	10/454	64/6899	0.00841736	0.00841736	0.35387	ARPC2/ARPC5/ARPC5L/CAPZA1/CAPZA2/GRB2/PFN2/RASA1/RDX/TMOD3	10	BP
GO:0045944	positive regulation of transcription by RNA polymerase II	30/454	290/6899	0.00858933	0.00858933	0.355628	BMP5/BMPR2/CEBPB/CHCHD2/CTNNB1/EAPP/FHL5/FOXA1/HEXB/HMGB2/IGF2/IL10/LMO2/MAML1/MED30/MEF2A/MYOCD/NCOA3/NR2C2/PID1/PLSCR1/PROX1/RHOQ/RNF4/RPRD1B/SLC30A9/TAF7/TBX2/TOP2A/ZFPM2	30	BP
GO:0071621	granulocyte chemotaxis	7/454	37/6899	0.00935517	0.00935517	0.381556	AMCF-II/ANXA1/CCL2/CCL8/CXCL10/CXCL9/TRPV4	7	BP
GO:0070098	chemokine-mediated signaling pathway	5/454	21/6899	0.0101855	0.0101855	0.403514	AMCF-II/CCL2/CCL8/CXCL10/CXCL9	5	BP
GO:1901879	regulation of protein depolymerization	6/454	29/6899	0.0101889	0.0101889	0.403514	APC/CAPZA1/CAPZA2/MAP1B/RDX/TMOD3	6	BP
GO:0030324	lung development	10/454	66/6899	0.0104288	0.0104288	0.407116	BMPR2/CHI3L1/FGF9/FOXA1/HIKESHI/LOX/PROX1/SAV1/TBX2/WNT2B	10	BP
GO:0050673	epithelial cell proliferation	17/454	141/6899	0.0108158	0.0108158	0.416275	BMP5/BMPR2/CCL2/CEBPB/DUSP10/FGF9/IGF2/IL10/KLF9/LOC100154044/NRAS/OSR2/PROX1/SAV1/SNAI2/STAT1/TBX2	17	BP
GO:0003281	ventricular septum development	6/454	30/6899	0.0120473	0.0120473	0.44786	AP2B1/BMPR2/HEYL/PRDM1/PROX1/SAV1	6	BP
GO:0030705	cytoskeleton-dependent intracellular transport	8/454	48/6899	0.0121281	0.0121281	0.44786	BLOC1S3/BLOC1S5/BLOC1S6/FYCO1/MAP1B/RAB1A/SNAPIN/UBB	8	BP
GO:0099111	microtubule-based transport	8/454	48/6899	0.0121281	0.0121281	0.44786	BLOC1S3/BLOC1S5/BLOC1S6/FYCO1/MAP1B/RAB1A/SNAPIN/UBB	8	BP
GO:0006919	activation of cysteine-type endopeptidase activity involved in apoptotic process	5/454	22/6899	0.012485	0.012485	0.450784	CASP8/CASP9/DAP/SLC1A1/STAT1	5	BP
GO:0071496	cellular response to external stimulus	11/454	78/6899	0.0125457	0.0125457	0.450784	AQP3/BMPR2/CASP8/CHEK1/DAP/PLIN2/PRKAG3/RRAGA/SNAI2/TMEM150C/WNT2B	11	BP
GO:0014706	striated muscle tissue development	9/454	58/6899	0.0127022	0.0127022	0.450784	ACADM/FGF9/LOX/MAML1/MEF2A/MYOCD/PROX1/SAV1/TBX2	9	BP
GO:0007049	cell cycle	45/454	490/6899	0.0128833	0.0128833	0.45135	ANAPC10/APC/APPL1/CCDC8/CCL2/CCNG1/CDC42/CDKN2C/CDKN3/CHEK1/CHMP2B/CHMP5/CHORDC1/CLTC/CTNNB1/DCTN6/EPB41/FOXA1/GRK5/HPGD/IL10/ING2/LSM14A/MAD2L1/MCMBP/MORF4L1/PARD6G/PMF1/PPP1CB/PRKAR2A/PROX1/PSMC3IP/RAB11A/RAD1/RNF4/RPRD1B/SGO2/SPIN1/STAT3/TBX2/TOP2A/TUBA1B/TUBE1/TXNIP/UBB	45	BP
GO:0045087	innate immune response	25/454	238/6899	0.0131184	0.0131184	0.453767	ANXA1/APPL1/ATG12/C1S/C7/CCL2/CCL8/CXCL10/DUSP10/GP91-PHOX/HMGB2/LOC100738479/LSM14A/LY96/MYD88/PLSCR1/RAB7B/RELA/SLPI/SPAI-2/STAT1/TIFA/TLR10/TLR3/TRIM26	25	BP
GO:0071363	cellular response to growth factor stimulus	20/454	179/6899	0.0135075	0.0135075	0.456584	APPL1/BAMBI/BMP5/BMPR2/CCL2/CTNNB1/FGF21/FGF9/GRB2/HEYL/HPGD/IL10/ING2/LOX/PDCD4/RASL11B/SMAD3/SMAD9/SNAI2/TBX2	20	BP
GO:0006886	intracellular protein transport	27/454	263/6899	0.013534	0.013534	0.456584	AP1S2/AP2B1/AP2M1/APPL1/ARF4/ARL4D/CLTC/COPB2/FGF9/HIKESHI/KPNA1/NXT2/RAB11A/RAB32/SEC24C/SLC1A1/SNAPIN/SNX27/SRP54/SRP9/STAT3/STRADB/STX11/STYX/TOMM22/TRPV4/TXNIP	27	BP
GO:0034612	response to tumor necrosis factor	10/454	69/6899	0.0141056	0.0141056	0.459627	ADAM10/CASP8/CCL2/CCL8/CHI3L1/ENDOG/PID1/RRAGA/STAT1/UBD	10	BP
GO:0070509	calcium ion import	4/454	15/6899	0.0141135	0.0141135	0.459627	CCL2/CTNNB1/GCG/TRPV4	4	BP
GO:0008286	insulin receptor signaling pathway	6/454	31/6899	0.014132	0.014132	0.459627	APPL1/GRB2/IGF2/PID1/PIP4K2A/RHOQ	6	BP
GO:1904019	epithelial cell apoptotic process	7/454	40/6899	0.014297	0.014297	0.459627	BMPR2/CASP9/CCL2/IL10/PDCD4/SAV1/USP53	7	BP
GO:0050678	regulation of epithelial cell proliferation	14/454	112/6899	0.0147078	0.0147078	0.467338	BMP5/BMPR2/CCL2/DUSP10/FGF9/IGF2/IL10/KLF9/NRAS/OSR2/PROX1/SAV1/SNAI2/STAT1	14	BP
GO:0097352	autophagosome maturation	5/454	23/6899	0.0151119	0.0151119	0.474188	ATG12/CHMP2B/CHMP5/FYCO1/SNAPIN	5	BP
GO:0043270	positive regulation of ion transport	8/454	50/6899	0.0153888	0.0153888	0.474188	CCL2/CEBPB/CXCL10/CXCL9/GCG/P2RY12/PDZK1/TRPV4	8	BP
GO:0051493	regulation of cytoskeleton organization	18/454	158/6899	0.015444	0.015444	0.474188	AP1AR/APC/ARPC2/ARPC5/ARPC5L/CAPZA1/CAPZA2/CHMP2B/CHMP5/GRB2/MAP1B/PFN2/PROX1/RASA1/RDX/RHOG/RNF4/TMOD3	18	BP
GO:0051656	establishment of organelle localization	13/454	102/6899	0.015801	0.015801	0.47976	AP1AR/BLOC1S3/BLOC1S5/BLOC1S6/CHMP2B/CHMP5/FYCO1/MAD2L1/MAP1B/RAB11A/RAB1A/SNAPIN/UBB	13	BP
GO:0009890	negative regulation of biosynthetic process	37/454	393/6899	0.0161956	0.0161956	0.483512	BASP1/BMI1/BMP5/BMPR2/CBX3/CDK3/CEBPB/CNOT11/CNOT8/CTNNB1/DAP/EAPP/FGF9/FOXA1/IGF2/IL10/LSM1/LSM14A/MDFIC/MEF2A/OSR2/PAIP2/PDCD4/PID1/PPHLN1/PROX1/RFX5/RIDA/SNAI2/SRP9/TAF7/TAF9B/TRPV4/TXNIP/WDTC1/ZBTB33/ZFPM2	37	BP
GO:0110053	regulation of actin filament organization	11/454	81/6899	0.0163934	0.0163934	0.483512	AP1AR/ARPC2/ARPC5/ARPC5L/CAPZA1/CAPZA2/GRB2/PFN2/RASA1/RDX/TMOD3	11	BP
GO:0048660	regulation of smooth muscle cell proliferation	6/454	32/6899	0.0164554	0.0164554	0.483512	BMPR2/CTNNB1/FGF9/IL10/PDCD4/STAT1	6	BP
GO:1902903	regulation of supramolecular fiber organization	14/454	114/6899	0.0169851	0.0169851	0.488061	AP1AR/APC/ARPC2/ARPC5/ARPC5L/CAPZA1/CAPZA2/GRB2/MAP1B/PFN2/PROX1/RASA1/RDX/TMOD3	14	BP
GO:0097529	myeloid leukocyte migration	9/454	61/6899	0.0173915	0.0173915	0.488061	AMCF-II/ANXA1/CCL2/CCL8/CXCL10/CXCL9/P2RY12/RHOG/TRPV4	9	BP
GO:0045893	positive regulation of DNA-templated transcription	38/454	408/6899	0.0174949	0.0174949	0.488061	BAMBI/BMP5/BMPR2/CEBPB/CHCHD2/CTNNB1/EAPP/FHL5/FOXA1/HEXB/HMGB2/IGF2/IL10/ING2/LMO2/MAML1/MDFIC/MED30/MEF2A/MSL3/MYOCD/NCOA3/NFIL3/NR2C2/PID1/PLSCR1/PROX1/RHOQ/RNF4/RPRD1B/SLC30A9/STAT1/STAT3/TAF7/TBX2/TFAM/TOP2A/ZFPM2	38	BP
GO:1903508	positive regulation of nucleic acid-templated transcription	38/454	408/6899	0.0174949	0.0174949	0.488061	BAMBI/BMP5/BMPR2/CEBPB/CHCHD2/CTNNB1/EAPP/FHL5/FOXA1/HEXB/HMGB2/IGF2/IL10/ING2/LMO2/MAML1/MDFIC/MED30/MEF2A/MSL3/MYOCD/NCOA3/NFIL3/NR2C2/PID1/PLSCR1/PROX1/RHOQ/RNF4/RPRD1B/SLC30A9/STAT1/STAT3/TAF7/TBX2/TFAM/TOP2A/ZFPM2	38	BP
GO:0008284	positive regulation of cell population proliferation	27/454	269/6899	0.0177716	0.0177716	0.488061	ADAM10/ANXA1/BAMBI/BMI1/BMP5/BMPR2/CD1D/CDCA7L/CNOT8/DCT/EAPP/FGF21/FGF9/GRK5/IGF2/IL10/LOC100520491/MAP3K3/NRAS/OSR2/PID1/PROX1/RPRD1B/SLC25A5/STAT1/TBX2/TFRC	27	BP
GO:0070848	response to growth factor	20/454	184/6899	0.0178415	0.0178415	0.488061	APPL1/BAMBI/BMP5/BMPR2/CCL2/CTNNB1/FGF21/FGF9/GRB2/HEYL/HPGD/IL10/ING2/LOX/PDCD4/RASL11B/SMAD3/SMAD9/SNAI2/TBX2	20	BP
GO:0051693	actin filament capping	4/454	16/6899	0.0178605	0.0178605	0.488061	CAPZA1/CAPZA2/RDX/TMOD3	4	BP
GO:1901880	negative regulation of protein depolymerization	5/454	24/6899	0.0180843	0.0180843	0.489283	APC/CAPZA1/CAPZA2/RDX/TMOD3	5	BP
GO:0007015	actin filament organization	16/454	138/6899	0.01863	0.01863	0.490388	AP1AR/ARPC2/ARPC5/ARPC5L/CAPZA1/CAPZA2/CDC42/GRB2/PFN2/PROX1/RASA1/RDX/RFLNB/RHOG/TMOD3/TRPV4	16	BP
GO:0045639	positive regulation of myeloid cell differentiation	6/454	33/6899	0.0190295	0.0190295	0.490388	CASP8/EVI2B/MTURN/RAB7B/STAT1/STAT3	6	BP
GO:0022411	cellular component disassembly	17/454	150/6899	0.0191544	0.0191544	0.490388	APC/ATG12/CAPZA1/CAPZA2/CHMP2B/CHMP5/ENDOG/FYCO1/MAP1B/MTRF1/PLIN2/RDX/SLC25A5/SNAI2/SNAPIN/TMOD3/TOP2A	17	BP
GO:0030029	actin filament-based process	25/454	246/6899	0.0191897	0.0191897	0.490388	ANXA1/AP1AR/ARPC2/ARPC5/ARPC5L/CAPZA1/CAPZA2/CDC42/CNN3/EPB41/GRB2/MEF2A/PFN2/PLEK/PROX1/RAP2B/RASA1/RDX/RFLNB/RHOG/RHOQ/SDCBP/SMTNL2/TMOD3/TRPV4	25	BP
GO:0046434	organophosphate catabolic process	8/454	52/6899	0.0192417	0.0192417	0.490388	HINT1/INPP5F/NUDT4/PDE4B/PLA2G4A/PLPP1/PRDX6/PTEN	8	BP
GO:0031327	negative regulation of cellular biosynthetic process	36/454	385/6899	0.0193392	0.0193392	0.490388	BASP1/BMI1/BMP5/BMPR2/CBX3/CDK3/CEBPB/CNOT11/CNOT8/CTNNB1/DAP/EAPP/FGF9/FOXA1/IGF2/LSM1/LSM14A/MDFIC/MEF2A/OSR2/PAIP2/PDCD4/PID1/PPHLN1/PROX1/RFX5/RIDA/SNAI2/SRP9/TAF7/TAF9B/TRPV4/TXNIP/WDTC1/ZBTB33/ZFPM2	36	BP
GO:1902680	positive regulation of RNA biosynthetic process	38/454	411/6899	0.0194523	0.0194523	0.490388	BAMBI/BMP5/BMPR2/CEBPB/CHCHD2/CTNNB1/EAPP/FHL5/FOXA1/HEXB/HMGB2/IGF2/IL10/ING2/LMO2/MAML1/MDFIC/MED30/MEF2A/MSL3/MYOCD/NCOA3/NFIL3/NR2C2/PID1/PLSCR1/PROX1/RHOQ/RNF4/RPRD1B/SLC30A9/STAT1/STAT3/TAF7/TBX2/TFAM/TOP2A/ZFPM2	38	BP
GO:0060485	mesenchyme development	12/454	94/6899	0.0197294	0.0197294	0.490388	ACTA2/BAMBI/BMPR2/CTNNB1/FGF9/FOXA1/HEYL/RADIL/RFLNB/SNAI2/STAT1/TBX2	12	BP
GO:0032956	regulation of actin cytoskeleton organization	13/454	105/6899	0.0197402	0.0197402	0.490388	AP1AR/ARPC2/ARPC5/ARPC5L/CAPZA1/CAPZA2/GRB2/PFN2/PROX1/RASA1/RDX/RHOG/TMOD3	13	BP
GO:0009617	response to bacterium	19/454	175/6899	0.0208469	0.0208469	0.500697	AMCF-II/CCL2/CEBPB/CHMP5/CXCL10/CXCL9/DUSP10/HMGB2/IL10/LY96/LYZ/MYD88/PDCD4/PLSCR4/RAB1A/RNASE4/SLPI/SPAI-2/TNIP3	19	BP
GO:0006606	protein import into nucleus	7/454	43/6899	0.0208685	0.0208685	0.500697	APPL1/FGF9/HIKESHI/KPNA1/NXT2/STAT3/TXNIP	7	BP
GO:0002221	pattern recognition receptor signaling pathway	9/454	63/6899	0.0211495	0.0211495	0.500697	APPL1/LSM14A/LY96/MAPKAPK3/MYD88/RAB7B/TIFA/TLR10/TLR3	9	BP
GO:0032535	regulation of cellular component size	13/454	106/6899	0.0212047	0.0212047	0.500697	ARPC2/ARPC5/ARPC5L/BMPR2/CAPZA1/CAPZA2/GRB2/PFN2/RAB11A/RASA1/RDX/TMOD3/TRPV4	13	BP
GO:0010257	NADH dehydrogenase complex assembly	5/454	25/6899	0.0214181	0.0214181	0.500697	ND1/ND2/ND4/ND5/ND6	5	BP
GO:0032981	mitochondrial respiratory chain complex I assembly	5/454	25/6899	0.0214181	0.0214181	0.500697	ND1/ND2/ND4/ND5/ND6	5	BP
GO:0034097	response to cytokine	26/454	261/6899	0.0215685	0.0215685	0.500697	ADAM10/AMCF-II/APPL1/CASP8/CCL2/CCL8/CHI3L1/CXCL10/CXCL9/ENDOG/JAK1/LOX/LSM14A/MAPKAPK3/MAT2A/NFIL3/PID1/RAB7B/RELA/RRAGA/SLC1A1/SLC25A5/STAT1/STAT3/UBD/VRK2	26	BP
GO:0048659	smooth muscle cell proliferation	6/454	34/6899	0.0218652	0.0218652	0.500697	BMPR2/CTNNB1/FGF9/IL10/PDCD4/STAT1	6	BP
GO:0002548	monocyte chemotaxis	4/454	17/6899	0.0221707	0.0221707	0.500697	ANXA1/CCL2/CCL8/CXCL10	4	BP
GO:0046839	phospholipid dephosphorylation	4/454	17/6899	0.0221707	0.0221707	0.500697	EPHX2/INPP5F/PLPP1/PTEN	4	BP
GO:0060420	regulation of heart growth	4/454	17/6899	0.0221707	0.0221707	0.500697	FGF9/PROX1/SAV1/TBX2	4	BP
GO:0007179	transforming growth factor beta receptor signaling pathway	8/454	54/6899	0.0237379	0.0237379	0.531697	APPL1/BAMBI/HPGD/ING2/LOX/RASL11B/SMAD3/SMAD9	8	BP
GO:0060669	embryonic placenta morphogenesis	3/454	10/6899	0.0239885	0.0239885	0.53294	GRB2/IGF2/IL10	3	BP
GO:1990266	neutrophil migration	6/454	35/6899	0.024973	0.024973	0.550338	AMCF-II/CCL2/CCL8/CXCL10/CXCL9/RHOG	6	BP
GO:0033002	muscle cell proliferation	8/454	55/6899	0.0262422	0.0262422	0.568856	BMPR2/CTNNB1/FGF9/IL10/PDCD4/SAV1/STAT1/TBX2	8	BP
GO:0030835	negative regulation of actin filament depolymerization	4/454	18/6899	0.0270623	0.0270623	0.568856	CAPZA1/CAPZA2/RDX/TMOD3	4	BP
GO:0034314	Arp2/3 complex-mediated actin nucleation	4/454	18/6899	0.0270623	0.0270623	0.568856	AP1AR/ARPC2/ARPC5/ARPC5L	4	BP
GO:0046324	regulation of glucose import	4/454	18/6899	0.0270623	0.0270623	0.568856	APPL1/FGF21/PID1/RHOQ	4	BP
GO:0048524	positive regulation of viral process	4/454	18/6899	0.0270623	0.0270623	0.568856	ATG12/MDFIC/TBC1D20/TOP2A	4	BP
GO:0098930	axonal transport	4/454	18/6899	0.0270623	0.0270623	0.568856	BLOC1S3/BLOC1S5/BLOC1S6/SNAPIN	4	BP
GO:0015748	organophosphate ester transport	6/454	36/6899	0.028362	0.028362	0.585149	ATP8B2/PLSCR1/PLSCR4/PRELID3B/SLC25A5/TRPV4	6	BP
GO:0006954	inflammatory response	25/454	255/6899	0.0284559	0.0284559	0.585149	AMCF-II/ANXA1/APPL1/CCL2/CCL8/CD200/CEBPB/CHI3L1/CXCL10/CXCL9/DUSP10/GP91-PHOX/HMGB2/IL10/MS4A2/MYD88/NLRP3/OLR1/PDCD4/PSMA1/RELA/STAT3/TLR10/TLR3/TRPV4	25	BP
GO:0031669	cellular response to nutrient levels	8/454	56/6899	0.0289247	0.0289247	0.585149	AQP3/BMPR2/DAP/PLIN2/PRKAG3/RRAGA/SNAI2/WNT2B	8	BP
GO:0048738	cardiac muscle tissue development	8/454	56/6899	0.0289247	0.0289247	0.585149	ACADM/FGF9/MAML1/MEF2A/MYOCD/PROX1/SAV1/TBX2	8	BP
GO:0051170	import into nucleus	7/454	46/6899	0.0292925	0.0292925	0.585149	APPL1/FGF9/HIKESHI/KPNA1/NXT2/STAT3/TXNIP	7	BP
GO:0080135	regulation of cellular response to stress	20/454	194/6899	0.0296958	0.0296958	0.585149	CASP9/CHCHD2/CHEK1/DEK/DUSP10/EFHD1/ENDOG/IL10/INPP5F/MAGI3/MAP3K3/MDFIC/MORF4L1/MTURN/OXR1/PARPBP/PPP4R3B/RAP2B/SNAI2/TRPV4	20	BP
GO:0016311	dephosphorylation	14/454	123/6899	0.0306913	0.0306913	0.585149	CDKN3/DUSP10/EPHX2/INPP5F/PLPP1/PPP1CB/PPP1R8/PPP4R3B/PSPH/PTEN/PTP4A1/PTPN13/RPRD1B/STYX	14	BP
GO:0036475	neuron death in response to oxidative stress	3/454	11/6899	0.0314053	0.0314053	0.585149	IL10/OXR1/SLC1A1	3	BP
GO:0042119	neutrophil activation	3/454	11/6899	0.0314053	0.0314053	0.585149	AMCF-II/ANXA1/FCGR3A	3	BP
GO:0070050	neuron cellular homeostasis	3/454	11/6899	0.0314053	0.0314053	0.585149	CHMP2B/HEXB/SNAPIN	3	BP
GO:1901623	regulation of lymphocyte chemotaxis	3/454	11/6899	0.0314053	0.0314053	0.585149	ADAM10/CCL2/CXCL10	3	BP
GO:1905517	macrophage migration	3/454	11/6899	0.0314053	0.0314053	0.585149	CCL2/P2RY12/TRPV4	3	BP
GO:0003205	cardiac chamber development	8/454	57/6899	0.0317906	0.0317906	0.585149	AP2B1/BMPR2/HEYL/MAML1/PRDM1/PROX1/SAV1/TBX2	8	BP
GO:0001936	regulation of endothelial cell proliferation	7/454	47/6899	0.0325456	0.0325456	0.585149	BMPR2/CCL2/IGF2/IL10/NRAS/PROX1/STAT1	7	BP
GO:0007254	JNK cascade	7/454	47/6899	0.0325456	0.0325456	0.585149	DUSP10/MAGI3/MDFIC/MTURN/RAP2B/STRADB/TRPV4	7	BP
GO:0008088	axo-dendritic transport	4/454	19/6899	0.0325484	0.0325484	0.585149	BLOC1S3/BLOC1S5/BLOC1S6/SNAPIN	4	BP
GO:0009395	phospholipid catabolic process	4/454	19/6899	0.0325484	0.0325484	0.585149	INPP5F/PLA2G4A/PLPP1/PRDX6	4	BP
GO:0048066	developmental pigmentation	4/454	19/6899	0.0325484	0.0325484	0.585149	BLOC1S3/BLOC1S5/BLOC1S6/DCT	4	BP
GO:0051384	response to glucocorticoid	4/454	19/6899	0.0325484	0.0325484	0.585149	ANXA1/CASP9/IL10/KLF9	4	BP
GO:0060412	ventricular septum morphogenesis	4/454	19/6899	0.0325484	0.0325484	0.585149	BMPR2/HEYL/PROX1/SAV1	4	BP
GO:0072523	purine-containing compound catabolic process	4/454	19/6899	0.0325484	0.0325484	0.585149	ADA2/HINT1/NUDT4/PDE4B	4	BP
GO:1902600	proton transmembrane transport	4/454	19/6899	0.0325484	0.0325484	0.585149	ATP6V1A/COX1/ND4/ND5	4	BP
GO:0090066	regulation of anatomical structure size	17/454	160/6899	0.0334389	0.0334389	0.597229	ARPC2/ARPC5/ARPC5L/BMPR2/CAPZA1/CAPZA2/COX1/COX2/GRB2/OLR1/PFN2/RAB11A/RASA1/RDX/SMTNL2/TMOD3/TRPV4	17	BP
GO:0032970	regulation of actin filament-based process	13/454	113/6899	0.0338194	0.0338194	0.600103	AP1AR/ARPC2/ARPC5/ARPC5L/CAPZA1/CAPZA2/GRB2/PFN2/PROX1/RASA1/RDX/RHOG/TMOD3	13	BP
GO:0071417	cellular response to organonitrogen compound	15/454	137/6899	0.0350559	0.0350559	0.608762	APPL1/CEBPB/CHMP5/CTNNB1/GNA14/GRB2/IGF2/P2RY12/PID1/PIP4K2A/RHOQ/RRAGA/SLC1A1/STAT1/STAT3	15	BP
GO:0002062	chondrocyte differentiation	6/454	38/6899	0.0360166	0.0360166	0.608762	BMPR2/FGF9/OSR2/RFLNB/SNAI2/WNT2B	6	BP
GO:0031503	protein-containing complex localization	6/454	38/6899	0.0360166	0.0360166	0.608762	ADAM10/AP2B1/FCGR3A/RAB11A/SLC1A1/SNAPIN	6	BP
GO:0043280	positive regulation of cysteine-type endopeptidase activity involved in apoptotic process	6/454	38/6899	0.0360166	0.0360166	0.608762	CASP8/CASP9/DAP/NLRP3/SLC1A1/STAT1	6	BP
GO:1903313	positive regulation of mRNA metabolic process	6/454	38/6899	0.0360166	0.0360166	0.608762	CNOT8/LEO1/LSM1/PRDX6/RIDA/ZFP36L2	6	BP
GO:0032869	cellular response to insulin stimulus	7/454	48/6899	0.0360315	0.0360315	0.608762	APPL1/GRB2/IGF2/PID1/PIP4K2A/RHOQ/STAT1	7	BP
GO:0050792	regulation of viral process	7/454	48/6899	0.0360315	0.0360315	0.608762	ATG12/LOC100738479/MDFIC/PLSCR1/PROX1/TBC1D20/TOP2A	7	BP
GO:1901699	cellular response to nitrogen compound	17/454	162/6899	0.0370508	0.0370508	0.608762	APPL1/CEBPB/CHMP5/CTNNB1/GNA11/GNA14/GRB2/IGF2/P2RY12/PID1/PIP4K2A/RGS10/RHOQ/RRAGA/SLC1A1/STAT1/STAT3	17	BP
GO:0000819	sister chromatid segregation	8/454	59/6899	0.0380916	0.0380916	0.608762	CHMP2B/CHMP5/CTNNB1/MAD2L1/MCMBP/RAB11A/SGO2/TOP2A	8	BP
GO:0001892	embryonic placenta development	5/454	29/6899	0.0386242	0.0386242	0.608762	CEBPB/GRB2/IGF2/IL10/PRDM1	5	BP
GO:0006749	glutathione metabolic process	5/454	29/6899	0.0386242	0.0386242	0.608762	CLIC2/GPX1/GSTA1/LOC100153094/SLC1A1	5	BP
GO:0043242	negative regulation of protein-containing complex disassembly	5/454	29/6899	0.0386242	0.0386242	0.608762	APC/CAPZA1/CAPZA2/RDX/TMOD3	5	BP
GO:0090307	mitotic spindle assembly	4/454	20/6899	0.0386369	0.0386369	0.608762	CHMP2B/CHMP5/LSM14A/RAB11A	4	BP
GO:0030099	myeloid cell differentiation	14/454	127/6899	0.0388639	0.0388639	0.608762	CASP3/CASP8/CEBPB/EVI2B/HOXB8/LEO1/LOX/MTURN/RAB7B/SLC25A5/SRP54/STAT1/STAT3/TMOD3	14	BP
GO:0042692	muscle cell differentiation	14/454	127/6899	0.0388639	0.0388639	0.608762	ACADM/BMPR2/CXCL10/CXCL9/IGF2/LOX/MAML1/MEF2A/MYOCD/PDCD4/PROX1/RIPOR2/TBX2/TMOD3	14	BP
GO:0001935	endothelial cell proliferation	7/454	49/6899	0.0397555	0.0397555	0.608762	BMPR2/CCL2/IGF2/IL10/NRAS/PROX1/STAT1	7	BP
GO:0002224	toll-like receptor signaling pathway	7/454	49/6899	0.0397555	0.0397555	0.608762	APPL1/LY96/MAPKAPK3/MYD88/RAB7B/TLR10/TLR3	7	BP
GO:0001881	receptor recycling	3/454	12/6899	0.0398767	0.0398767	0.608762	AP1AR/CHMP5/INPP5F	3	BP
GO:0010894	negative regulation of steroid biosynthetic process	3/454	12/6899	0.0398767	0.0398767	0.608762	BMP5/PROX1/SNAI2	3	BP
GO:0017145	stem cell division	3/454	12/6899	0.0398767	0.0398767	0.608762	BMI1/EVI2B/ING2	3	BP
GO:0034605	cellular response to heat	3/454	12/6899	0.0398767	0.0398767	0.608762	HIKESHI/SUMO1/TRPV4	3	BP
GO:0036230	granulocyte activation	3/454	12/6899	0.0398767	0.0398767	0.608762	AMCF-II/ANXA1/FCGR3A	3	BP
GO:0045939	negative regulation of steroid metabolic process	3/454	12/6899	0.0398767	0.0398767	0.608762	BMP5/PROX1/SNAI2	3	BP
GO:0090224	regulation of spindle organization	3/454	12/6899	0.0398767	0.0398767	0.608762	CHMP2B/CHMP5/RNF4	3	BP
GO:0090279	regulation of calcium ion import	3/454	12/6899	0.0398767	0.0398767	0.608762	CCL2/CTNNB1/GCG	3	BP
GO:0035051	cardiocyte differentiation	6/454	39/6899	0.0402959	0.0402959	0.611743	ACADM/MAML1/MEF2A/MYOCD/PROX1/TBX2	6	BP
GO:0150063	visual system development	11/454	93/6899	0.0408826	0.0408826	0.617221	BMPR2/FGF9/OSR2/P2RY12/PRDM1/PROX1/SLC1A1/STAT3/TBC1D20/TBX2/TULP3	11	BP
GO:0061448	connective tissue development	10/454	82/6899	0.0417362	0.0417362	0.61937	BMPR2/FGF9/FOXA1/LOX/OSR2/RFLNB/SNAI2/TRPV4/UBB/WNT2B	10	BP
GO:0007017	microtubule-based process	26/454	278/6899	0.0426773	0.0426773	0.61937	APC/BLOC1S3/BLOC1S5/BLOC1S6/CCDC8/CHEK1/CHMP2B/CHMP5/CHORDC1/CTNNB1/DCTN6/FYCO1/ING2/LSM14A/MAD2L1/MAP1B/PARD6G/RAB11A/RAB1A/RNF4/SNAPIN/SPEF2/TTL/TUBA1B/TUBE1/UBB	26	BP
GO:0031667	response to nutrient levels	11/454	94/6899	0.043686	0.043686	0.61937	ACADM/AQP3/BMPR2/DAP/PLIN2/PRKAG3/RRAGA/SNAI2/STAT1/TRPV4/WNT2B	11	BP
GO:0008584	male gonad development	7/454	50/6899	0.0437222	0.0437222	0.61937	FGF9/HMGB2/ING2/LOC100154044/TBC1D20/UBB/WNT2B	7	BP
GO:0034764	positive regulation of transmembrane transport	7/454	50/6899	0.0437222	0.0437222	0.61937	APPL1/CXCL10/CXCL9/FGF21/PDZK1/RHOQ/TRPV4	7	BP
GO:0046546	development of primary male sexual characteristics	7/454	50/6899	0.0437222	0.0437222	0.61937	FGF9/HMGB2/ING2/LOC100154044/TBC1D20/UBB/WNT2B	7	BP
GO:0001938	positive regulation of endothelial cell proliferation	5/454	30/6899	0.0439395	0.0439395	0.61937	BMPR2/IGF2/IL10/NRAS/PROX1	5	BP
GO:0060411	cardiac septum morphogenesis	5/454	30/6899	0.0439395	0.0439395	0.61937	BMPR2/HEYL/PROX1/SAV1/TBX2	5	BP
GO:0051258	protein polymerization	10/454	83/6899	0.0447947	0.0447947	0.61937	ARPC2/ARPC5/ARPC5L/CAPZA1/CAPZA2/GRB2/PFN2/RASA1/RDX/TMOD3	10	BP
GO:0098813	nuclear chromosome segregation	10/454	83/6899	0.0447947	0.0447947	0.61937	CDC42/CHMP2B/CHMP5/CTNNB1/MAD2L1/MCMBP/PSMC3IP/RAB11A/SGO2/TOP2A	10	BP
GO:0042102	positive regulation of T cell proliferation	6/454	40/6899	0.0448839	0.0448839	0.61937	ANXA1/BMI1/CD1D/IGF2/LOC100520491/TFRC	6	BP
GO:0051261	protein depolymerization	6/454	40/6899	0.0448839	0.0448839	0.61937	APC/CAPZA1/CAPZA2/MAP1B/RDX/TMOD3	6	BP
GO:2001056	positive regulation of cysteine-type endopeptidase activity	6/454	40/6899	0.0448839	0.0448839	0.61937	CASP8/CASP9/DAP/NLRP3/SLC1A1/STAT1	6	BP
GO:0048545	response to steroid hormone	8/454	61/6899	0.0451798	0.0451798	0.61937	ANXA1/CASP9/FOXA1/HEYL/HMGB2/IL10/KLF9/TAF7	8	BP
GO:0050679	positive regulation of epithelial cell proliferation	8/454	61/6899	0.0451798	0.0451798	0.61937	BMP5/BMPR2/FGF9/IGF2/IL10/NRAS/OSR2/PROX1	8	BP
GO:0030834	regulation of actin filament depolymerization	4/454	21/6899	0.0453314	0.0453314	0.61937	CAPZA1/CAPZA2/RDX/TMOD3	4	BP
GO:0045010	actin nucleation	4/454	21/6899	0.0453314	0.0453314	0.61937	AP1AR/ARPC2/ARPC5/ARPC5L	4	BP
GO:0046323	glucose import	4/454	21/6899	0.0453314	0.0453314	0.61937	APPL1/FGF21/PID1/RHOQ	4	BP
GO:0060419	heart growth	4/454	21/6899	0.0453314	0.0453314	0.61937	FGF9/PROX1/SAV1/TBX2	4	BP
GO:0048880	sensory system development	11/454	95/6899	0.0466189	0.0466189	0.633793	BMPR2/FGF9/OSR2/P2RY12/PRDM1/PROX1/SLC1A1/STAT3/TBC1D20/TBX2/TULP3	11	BP
GO:0017148	negative regulation of translation	7/454	51/6899	0.0479356	0.0479356	0.643292	CNOT11/CNOT8/LSM1/LSM14A/PAIP2/RIDA/SRP9	7	BP
GO:0051090	regulation of DNA-binding transcription factor activity	14/454	131/6899	0.0484846	0.0484846	0.643292	CEBPB/DAP/FOXA1/HEYL/IL10/LOC100738479/MTURN/NTS/PROX1/RAB7B/RELA/SAV1/THAP11/TRIM26	14	BP
GO:0098542	defense response to other organism	32/454	360/6899	0.048513	0.048513	0.643292	AMCF-II/ANXA1/APPL1/ATG12/C1S/C7/CCL2/CCL8/CEBPB/CXCL10/CXCL9/DUSP10/GP91-PHOX/HMGB2/IL10/LOC100738479/LSM14A/LY96/LYZ/MYD88/PLSCR1/RAB1A/RAB7B/RELA/RNASE4/SLPI/SPAI-2/STAT1/TIFA/TLR10/TLR3/TRIM26	32	BP
GO:0034142	toll-like receptor 4 signaling pathway	3/454	13/6899	0.0493768	0.0493768	0.643292	APPL1/LY96/RAB7B	3	BP
GO:0046326	positive regulation of glucose import	3/454	13/6899	0.0493768	0.0493768	0.643292	APPL1/FGF21/RHOQ	3	BP
GO:0097009	energy homeostasis	3/454	13/6899	0.0493768	0.0493768	0.643292	STAT3/TRPV4/UBB	3	BP
GO:0099072	regulation of postsynaptic membrane neurotransmitter receptor levels	3/454	13/6899	0.0493768	0.0493768	0.643292	ADAM10/AP2B1/RAB11A	3	BP
GO:0030593	neutrophil chemotaxis	5/454	31/6899	0.0496718	0.0496718	0.643292	AMCF-II/CCL2/CCL8/CXCL10/CXCL9	5	BP
GO:0055007	cardiac muscle cell differentiation	5/454	31/6899	0.0496718	0.0496718	0.643292	ACADM/MAML1/MEF2A/MYOCD/PROX1	5	BP
GO:0062014	negative regulation of small molecule metabolic process	5/454	31/6899	0.0496718	0.0496718	0.643292	BMP5/PID1/PROX1/SNAI2/WDTC1	5	BP
GO:0005905	clathrin-coated pit	6/465	17/7848	0.000295739	0.000295739	0.097127	AP1S2/AP2B1/AP2M1/BMPR2/CLTC/INPP5F	6	CC
GO:1990204	oxidoreductase complex	11/465	65/7848	0.00136399	0.00136399	0.129145	COX1/CYTB/GP91-PHOX/IDH3A/NCF2/ND1/ND2/ND3/ND4/ND5/ND6	11	CC
GO:0005740	mitochondrial envelope	30/465	284/7848	0.00138299	0.00138299	0.129145	ACADM/APOOL/ARL2BP/ATP6/BCL2A1/CHCHD2/COX1/COX2/COX3/CYTB/EFHD1/ENDOG/FUNDC1/LOC100154044/MGST1/ND1/ND2/ND3/ND4/ND4L/ND5/ND6/PRELID3B/RAB32/RNF144B/SLC25A24/SLC25A5/TOMM22/UBB/VRK2	30	CC
GO:0070469	respirasome	11/465	67/7848	0.00175984	0.00175984	0.129145	COX1/COX2/COX3/CYTB/ND1/ND2/ND3/ND4/ND4L/ND5/ND6	11	CC
GO:0005746	mitochondrial respirasome	10/465	59/7848	0.00220459	0.00220459	0.129145	COX1/COX2/COX3/CYTB/ND1/ND2/ND3/ND4/ND5/ND6	10	CC
GO:0098803	respiratory chain complex	10/465	61/7848	0.00284624	0.00284624	0.129145	COX1/COX2/COX3/CYTB/ND1/ND2/ND3/ND4/ND5/ND6	10	CC
GO:0031082	BLOC complex	4/465	11/7848	0.00287405	0.00287405	0.129145	BLOC1S3/BLOC1S5/BLOC1S6/SNAPIN	4	CC
GO:0031966	mitochondrial membrane	27/465	261/7848	0.00317989	0.00317989	0.129145	ACADM/APOOL/ATP6/BCL2A1/COX1/COX2/COX3/CYTB/EFHD1/ENDOG/FUNDC1/LOC100154044/MGST1/ND1/ND2/ND3/ND4/ND4L/ND5/ND6/RAB32/RNF144B/SLC25A24/SLC25A5/TOMM22/UBB/VRK2	27	CC
GO:0000793	condensed chromosome	11/465	73/7848	0.00353908	0.00353908	0.129145	CEBPB/CHEK1/CHMP2B/CHMP5/HMGB2/MAD2L1/PMF1/PSMC3IP/RAD1/SGO2/TOP2A	11	CC
GO:0030665	clathrin-coated vesicle membrane	5/465	20/7848	0.00527236	0.00527236	0.131025	AP1S2/AP2B1/ATP6V1A/ATP6V1D/CLTC	5	CC
GO:0098800	inner mitochondrial membrane protein complex	12/465	88/7848	0.00545256	0.00545256	0.131025	APOOL/ATP6/COX1/COX2/COX3/CYTB/ND1/ND2/ND3/ND4/ND5/ND6	12	CC
GO:0031967	organelle envelope	38/465	421/7848	0.00577054	0.00577054	0.131025	ACADM/APOOL/ARL2BP/ATP6/BCL2A1/CHCHD2/CHMP2B/CHMP5/COX1/COX2/COX3/CYTB/EFHD1/ENDOG/FUNDC1/GRK5/LOC100154044/MAD2L1/MGST1/ND1/ND2/ND3/ND4/ND4L/ND5/ND6/NUP54/NXT2/PRELID3B/RAB32/RNF144B/SLC25A24/SLC25A5/SUMO1/TBC1D20/TOMM22/UBB/VRK2	38	CC
GO:0031975	envelope	38/465	421/7848	0.00577054	0.00577054	0.131025	ACADM/APOOL/ARL2BP/ATP6/BCL2A1/CHCHD2/CHMP2B/CHMP5/COX1/COX2/COX3/CYTB/EFHD1/ENDOG/FUNDC1/GRK5/LOC100154044/MAD2L1/MGST1/ND1/ND2/ND3/ND4/ND4L/ND5/ND6/NUP54/NXT2/PRELID3B/RAB32/RNF144B/SLC25A24/SLC25A5/SUMO1/TBC1D20/TOMM22/UBB/VRK2	38	CC
GO:0015630	microtubule cytoskeleton	34/465	367/7848	0.005965	0.005965	0.131025	ACTA2/APC/APC2/ARL2BP/CBX3/CCDC8/CDC42/CHEK1/CHMP2B/CHMP5/CLTC/CTNNB1/DCTN6/HNMT/IFT22/LEO1/LSM14A/MAD2L1/MAP1B/PPP4R3B/PRPF19/PSMA1/RAB11A/RADIL/RILPL2/RNF4/SLC25A5/SMTNL2/SNAPIN/SPEF2/TOP2A/TTL/TUBA1B/TUBE1	34	CC
GO:0015629	actin cytoskeleton	16/465	135/7848	0.00598431	0.00598431	0.131025	ACTA2/ARPC2/ARPC5/ARPC5L/CAPZA1/CAPZA2/DCTN6/DENND2A/LOC733637/MRLC2/RFLNB/RHOQ/SMTNL2/TMOD3/TNNI3/ZNF185	16	CC
GO:0030662	coated vesicle membrane	7/465	39/7848	0.00720876	0.00720876	0.147969	AP1S2/AP2B1/ATP6V1A/ATP6V1D/CLTC/COPB2/SEC24C	7	CC
GO:0030120	vesicle coat	5/465	22/7848	0.00812034	0.00812034	0.156876	AP1S2/AP2B1/CLTC/COPB2/SEC24C	5	CC
GO:0030136	clathrin-coated vesicle	7/465	41/7848	0.00951683	0.00951683	0.170809	ADAM10/AP1S2/AP2B1/ATP6V1A/ATP6V1D/CLTC/INPP5F	7	CC
GO:0005643	nuclear pore	5/465	23/7848	0.00988171	0.00988171	0.170809	CHMP2B/CHMP5/MAD2L1/NUP54/NXT2	5	CC
GO:0005747	mitochondrial respiratory chain complex I	6/465	33/7848	0.0118171	0.0118171	0.176409	ND1/ND2/ND3/ND4/ND5/ND6	6	CC
GO:0030964	NADH dehydrogenase complex	6/465	33/7848	0.0118171	0.0118171	0.176409	ND1/ND2/ND3/ND4/ND5/ND6	6	CC
GO:0045271	respiratory chain complex I	6/465	33/7848	0.0118171	0.0118171	0.176409	ND1/ND2/ND3/ND4/ND5/ND6	6	CC
GO:0030118	clathrin coat	4/465	16/7848	0.0125155	0.0125155	0.178711	AP1S2/AP2B1/AP2M1/CLTC	4	CC
GO:0098796	membrane protein complex	41/465	491/7848	0.0151904	0.0151904	0.198018	ADAM10/AP1S2/AP2B1/AP2M1/APOOL/ATP6/ATP6V1A/ATP6V1D/ATP6V1G1/BLOC1S6/C7/CASP8/CD3D/CHMP2B/CISH/CLIC2/CLTC/COPB2/COX1/COX2/COX3/CTNNB1/CYTB/GNA14/GP91-PHOX/GRB2/LY96/MS4A2/NCF2/ND1/ND2/ND3/ND4/ND5/ND6/SEC24C/SLA-DMB/SLA-DQA1/SLA-DRA/SLC25A5/STX11	41	CC
GO:0030117	membrane coat	6/465	35/7848	0.0156764	0.0156764	0.198018	AP1S2/AP2B1/AP2M1/CLTC/COPB2/SEC24C	6	CC
GO:0048475	coated membrane	6/465	35/7848	0.0156764	0.0156764	0.198018	AP1S2/AP2B1/AP2M1/CLTC/COPB2/SEC24C	6	CC
GO:0042611	MHC protein complex	3/465	10/7848	0.0181372	0.0181372	0.209746	SLA-DMB/SLA-DQA1/SLA-DRA	3	CC
GO:0042613	MHC class II protein complex	3/465	10/7848	0.0181372	0.0181372	0.209746	SLA-DMB/SLA-DQA1/SLA-DRA	3	CC
GO:0032154	cleavage furrow	4/465	18/7848	0.0191595	0.0191595	0.209746	PPP1CC/RAB11A/RDX/STAMBP	4	CC
GO:1904115	axon cytoplasm	4/465	18/7848	0.0191595	0.0191595	0.209746	BLOC1S3/BLOC1S5/BLOC1S6/SNAPIN	4	CC
GO:0090575	RNA polymerase II transcription regulator complex	11/465	94/7848	0.022611	0.022611	0.223265	CBX3/CEBPB/CTNNB1/ING2/MED30/NFIL3/RFX5/SMAD3/SMAD9/TAF7/TAF9B	11	CC
GO:0097731	9+0 non-motile cilium	5/465	28/7848	0.022641	0.022641	0.223265	C10H1orf115/GNA11/MAP1B/PIP4K2A/TULP3	5	CC
GO:0070062	extracellular exosome	4/465	19/7848	0.0231612	0.0231612	0.223265	ANXA1/RAB11A/RAP2B/XPNPEP2	4	CC
GO:0140513	nuclear protein-containing complex	39/465	476/7848	0.0232318	0.0232318	0.223265	ANAPC10/BMI1/C1H9orf78/CBX3/CDK3/CEBPB/CHMP2B/CHMP5/CTNNB1/GRB2/HINT1/ING2/LEO1/LGALS3/LSM3/MAD2L1/MED30/MORF4L1/MSL3/NFIL3/NHP2/NOP10/NUDT21/NUP54/NXT2/PMF1/POLR2K/PRPF19/RAD1/RELA/RFX5/RPRD1B/SF3B6/SMAD3/SMAD9/SNRPB2/SRSF2/TAF7/TAF9B	39	CC
GO:0012506	vesicle membrane	22/465	237/7848	0.0237934	0.0237934	0.223265	ANXA1/AP1S2/AP2B1/APPL1/ATP6V1A/ATP6V1D/CHMP2B/CHMP5/CLTC/COPB2/DCT/GRB2/LAMTOR3/MPEG1/RAB11A/RAB32/RAB35/RAP2B/SEC24C/SLA-DMB/SLC1A1/SNAPIN	22	CC
GO:0098798	mitochondrial protein-containing complex	15/465	146/7848	0.0258297	0.0258297	0.235639	APOOL/ATP6/COX1/COX2/COX3/CYTB/IDH3A/MRPL3/ND1/ND2/ND3/ND4/ND5/ND6/SLC25A5	15	CC
GO:0005743	mitochondrial inner membrane	17/465	173/7848	0.0271502	0.0271502	0.235728	APOOL/ATP6/COX1/COX2/COX3/CYTB/EFHD1/ENDOG/ND1/ND2/ND3/ND4/ND4L/ND5/ND6/SLC25A24/SLC25A5	17	CC
GO:0030133	transport vesicle	12/465	109/7848	0.027275	0.027275	0.235728	AP1AR/AP1S2/ATP6V1A/BLOC1S3/BLOC1S5/BLOC1S6/CLTC/NTS/RAB11A/SEC24C/SNAPIN/STX11	12	CC
GO:0030131	clathrin adaptor complex	3/465	12/7848	0.0304441	0.0304441	0.248875	AP1S2/AP2B1/AP2M1	3	CC
GO:0032153	cell division site	4/465	21/7848	0.032585	0.032585	0.248875	PPP1CC/RAB11A/RDX/STAMBP	4	CC
GO:0043230	extracellular organelle	4/465	21/7848	0.032585	0.032585	0.248875	ANXA1/RAB11A/RAP2B/XPNPEP2	4	CC
GO:0065010	extracellular membrane-bounded organelle	4/465	21/7848	0.032585	0.032585	0.248875	ANXA1/RAB11A/RAP2B/XPNPEP2	4	CC
GO:1903561	extracellular vesicle	4/465	21/7848	0.032585	0.032585	0.248875	ANXA1/RAB11A/RAP2B/XPNPEP2	4	CC
GO:0030659	cytoplasmic vesicle membrane	21/465	232/7848	0.0340575	0.0340575	0.253917	ANXA1/AP1S2/AP2B1/APPL1/ATP6V1A/ATP6V1D/CHMP2B/CHMP5/CLTC/COPB2/DCT/LAMTOR3/MPEG1/RAB11A/RAB32/RAB35/RAP2B/SEC24C/SLA-DMB/SLC1A1/SNAPIN	21	CC
GO:0030135	coated vesicle	9/465	76/7848	0.0347915	0.0347915	0.253917	ADAM10/AP1S2/AP2B1/ATP6V1A/ATP6V1D/CLTC/COPB2/INPP5F/SEC24C	9	CC
GO:0032432	actin filament bundle	3/465	13/7848	0.0378782	0.0378782	0.261805	LOC733637/MRLC2/RFLNB	3	CC
GO:0120111	neuron projection cytoplasm	4/465	22/7848	0.0380216	0.0380216	0.261805	BLOC1S3/BLOC1S5/BLOC1S6/SNAPIN	4	CC
GO:0097730	non-motile cilium	5/465	32/7848	0.0382639	0.0382639	0.261805	C10H1orf115/GNA11/MAP1B/PIP4K2A/TULP3	5	CC
GO:0000775	chromosome, centromeric region	8/465	66/7848	0.0401252	0.0401252	0.268938	CBX3/CEBPB/CHMP2B/CHMP5/MAD2L1/PMF1/SGO2/TOP2A	8	CC
GO:0015453	oxidoreduction-driven active transmembrane transporter activity	11/455	21/7135	1.24033e-08	1.24033e-08	5.27465e-06	COX1/COX2/COX3/CYTB/ND1/ND2/ND3/ND4/ND4L/ND5/ND6	11	MF
GO:0009055	electron transfer activity	12/455	29/7135	7.50614e-08	7.50614e-08	1.59604e-05	COX1/COX2/COX3/CYTB/ETFA/ND1/ND2/ND3/ND4/ND4L/ND5/ND6	12	MF
GO:0003954	NADH dehydrogenase activity	7/455	12/7135	2.45223e-06	2.45223e-06	0.000208569	ND1/ND2/ND3/ND4/ND4L/ND5/ND6	7	MF
GO:0008137	NADH dehydrogenase (ubiquinone) activity	7/455	12/7135	2.45223e-06	2.45223e-06	0.000208569	ND1/ND2/ND3/ND4/ND4L/ND5/ND6	7	MF
GO:0050136	NADH dehydrogenase (quinone) activity	7/455	12/7135	2.45223e-06	2.45223e-06	0.000208569	ND1/ND2/ND3/ND4/ND4L/ND5/ND6	7	MF
GO:0003955	NAD(P)H dehydrogenase (quinone) activity	7/455	14/7135	9.4947e-06	9.4947e-06	0.000672958	ND1/ND2/ND3/ND4/ND4L/ND5/ND6	7	MF
GO:0015399	primary active transmembrane transporter activity	14/455	62/7135	2.57159e-05	2.57159e-05	0.00150353	ATP6V1A/ATP6V1D/ATP6V1G1/COX1/COX2/COX3/CYTB/ND1/ND2/ND3/ND4/ND4L/ND5/ND6	14	MF
GO:0016655	oxidoreductase activity, acting on NAD(P)H, quinone or similar compound as acceptor	7/455	16/7135	2.82842e-05	2.82842e-05	0.00150353	ND1/ND2/ND3/ND4/ND4L/ND5/ND6	7	MF
GO:0019001	guanyl nucleotide binding	29/455	206/7135	4.09219e-05	4.09219e-05	0.00193362	AK3/ARF4/ARL10/ARL13B/ARL4D/CDC42/EIF2S3/GIMAP8/GNA11/GNA14/IFI44/NRAS/RAB11A/RAB1A/RAB1B/RAB32/RAB35/RAB7B/RAP2B/RASL11B/RERG/RHOG/RHOJ/RHOQ/RP2/RRAGA/SRP54/TUBA1B/TUBE1	29	MF
GO:0005525	GTP binding	28/455	197/7135	4.6634e-05	4.6634e-05	0.00198317	AK3/ARF4/ARL10/ARL13B/ARL4D/CDC42/EIF2S3/GIMAP8/GNA11/IFI44/NRAS/RAB11A/RAB1A/RAB1B/RAB32/RAB35/RAB7B/RAP2B/RASL11B/RERG/RHOG/RHOJ/RHOQ/RP2/RRAGA/SRP54/TUBA1B/TUBE1	28	MF
GO:0003925	G protein activity	6/455	13/7135	7.5965e-05	7.5965e-05	0.00275213	CDC42/NRAS/RAB11A/RAB1A/RAB1B/RAP2B	6	MF
GO:0032561	guanyl ribonucleotide binding	28/455	203/7135	8.02285e-05	8.02285e-05	0.00275213	AK3/ARF4/ARL10/ARL13B/ARL4D/CDC42/EIF2S3/GIMAP8/GNA11/IFI44/NRAS/RAB11A/RAB1A/RAB1B/RAB32/RAB35/RAB7B/RAP2B/RASL11B/RERG/RHOG/RHOJ/RHOQ/RP2/RRAGA/SRP54/TUBA1B/TUBE1	28	MF
GO:0003924	GTPase activity	23/455	152/7135	8.41308e-05	8.41308e-05	0.00275213	ARF4/ARL10/ARL13B/ARL4D/CDC42/EIF2S3/GNA11/GNA14/NRAS/RAB11A/RAB1A/RAB1B/RAB32/RAB35/RAB7B/RAP2B/RASL11B/RERG/RHOG/RHOJ/RHOQ/RRAGA/SRP54	23	MF
GO:0019904	protein domain specific binding	24/455	166/7135	0.00012356	0.00012356	0.00375326	ADAM10/BMI1/CASP8/CASP9/CBX3/CHEK1/CHMP2B/CLTC/DAP/DAZAP2/FOXA1/GRB2/HEYL/HMGB2/LOC100154044/MYD88/PDZK1/PLSCR1/PROX1/RAP2B/RHOQ/STYX/TRPV4/VRK2	24	MF
GO:0016651	oxidoreductase activity, acting on NAD(P)H	8/455	26/7135	0.000144429	0.000144429	0.00409468	GP91-PHOX/ND1/ND2/ND3/ND4/ND4L/ND5/ND6	8	MF
GO:0016462	pyrophosphatase activity	29/455	258/7135	0.00190899	0.00190899	0.0507388	ARF4/ARL10/ARL13B/ARL4D/ATP6V1G1/ATP8B2/CDC42/EIF2S3/GNA11/GNA14/NRAS/NUDT4/PLPP1/PPA1/RAB11A/RAB1A/RAB1B/RAB32/RAB35/RAB7B/RAP2B/RASL11B/RERG/RFC5/RHOG/RHOJ/RHOQ/RRAGA/SRP54	29	MF
GO:0016491	oxidoreductase activity	39/455	382/7135	0.00212341	0.00212341	0.053118	ACADL/ACADM/AKR7A2/ALDH2/CMAH/COX1/COX2/COX3/CP/CRYZL1/CYTB/DCT/ETFA/FAR2/FTO/GLYR1/GP91-PHOX/GPX1/GPX8/HMGCR/HPGD/IDH3A/IDO1/KIAA1191/LOX/MGST1/ND1/ND2/ND3/ND4/ND4L/ND5/ND6/OXR1/P4HA1/PHYHD1/PRDX6/SC5D/TET1	39	MF
GO:0016818	hydrolase activity, acting on acid anhydrides, in phosphorus-containing anhydrides	29/455	261/7135	0.00227452	0.00227452	0.0537373	ARF4/ARL10/ARL13B/ARL4D/ATP6V1G1/ATP8B2/CDC42/EIF2S3/GNA11/GNA14/NRAS/NUDT4/PLPP1/PPA1/RAB11A/RAB1A/RAB1B/RAB32/RAB35/RAB7B/RAP2B/RASL11B/RERG/RFC5/RHOG/RHOJ/RHOQ/RRAGA/SRP54	29	MF
GO:0016817	hydrolase activity, acting on acid anhydrides	29/455	262/7135	0.00240902	0.00240902	0.0539194	ARF4/ARL10/ARL13B/ARL4D/ATP6V1G1/ATP8B2/CDC42/EIF2S3/GNA11/GNA14/NRAS/NUDT4/PLPP1/PPA1/RAB11A/RAB1A/RAB1B/RAB32/RAB35/RAB7B/RAP2B/RASL11B/RERG/RFC5/RHOG/RHOJ/RHOQ/RRAGA/SRP54	29	MF
GO:0017111	ribonucleoside triphosphate phosphatase activity	26/455	230/7135	0.00297877	0.00297877	0.0633381	ARF4/ARL10/ARL13B/ARL4D/ATP6V1G1/ATP8B2/CDC42/EIF2S3/GNA11/GNA14/NRAS/RAB11A/RAB1A/RAB1B/RAB32/RAB35/RAB7B/RAP2B/RASL11B/RERG/RFC5/RHOG/RHOJ/RHOQ/RRAGA/SRP54	26	MF
GO:0004602	glutathione peroxidase activity	4/455	11/7135	0.00375672	0.00375672	0.0760759	GPX1/GPX8/MGST1/PRDX6	4	MF
GO:0008009	chemokine activity	7/455	33/7135	0.00409863	0.00409863	0.0792271	AMCF-II/CCL11/CCL19/CCL2/CCL8/CXCL10/CXCL9	7	MF
GO:0019900	kinase binding	22/455	196/7135	0.00658558	0.00658558	0.121765	ADAM10/APPL1/BMPR2/CASP9/CDKN2C/CEBPB/DAZAP2/DUSP10/GRB2/JAKMIP1/LOC100738479/MAML1/MAPK6/MAPKAPK3/PARD6G/PRKAG3/RHOG/SIT1/STAT3/TOP2A/TRPV4/VRK2	22	MF
GO:0017018	myosin phosphatase activity	6/455	28/7135	0.00735662	0.00735662	0.130354	CDKN3/CTDSP2/DUSP10/PPP1CB/PPP1CC/PTEN	6	MF
GO:0022804	active transmembrane transporter activity	18/455	153/7135	0.00834705	0.00834705	0.141988	ATP6V1A/ATP6V1D/ATP6V1G1/COX1/COX2/COX3/CYTB/ND1/ND2/ND3/ND4/ND4L/ND5/ND6/SLC13A1/SLC1A1/SLC25A5/SLC26A3	18	MF
GO:0015078	proton transmembrane transporter activity	9/455	58/7135	0.0104779	0.0104779	0.17138	ATP6/ATP6V1A/ATP6V1D/ATP6V1G1/COX1/COX2/COX3/CYTB/SLC25A5	9	MF
GO:0016788	hydrolase activity, acting on ester bonds	30/455	309/7135	0.0132894	0.0132894	0.209315	ALDH2/ASPA/CDKN3/CNOT8/CTDSP2/DCLRE1A/DUSP10/ENDOG/EPHX2/EXO1/INPP5F/KHNYN/LIPA/LOC100736962/LPL/PDE4B/PLA2G4A/PLPP1/PPP1CB/PPP1CC/PRDX6/PSPH/PTEN/PTP4A1/PTPN13/PTRH1/RAD1/RNASE4/RNASEL/STYX	30	MF
GO:0042379	chemokine receptor binding	7/455	42/7135	0.0157926	0.0157926	0.239858	AMCF-II/CCL11/CCL19/CCL2/CCL8/CXCL10/CXCL9	7	MF
GO:0019901	protein kinase binding	19/455	177/7135	0.0173155	0.0173155	0.253918	ADAM10/APPL1/BMPR2/CASP9/CDKN2C/DAZAP2/DUSP10/GRB2/LOC100738479/MAML1/MAPK6/MAPKAPK3/PARD6G/PRKAG3/RHOG/STAT3/TOP2A/TRPV4/VRK2	19	MF
GO:0042826	histone deacetylase binding	5/455	25/7135	0.0189416	0.0189416	0.257382	CEBPB/MEF2A/PRDM1/TBX2/TOP2A	5	MF
GO:0001664	G protein-coupled receptor binding	15/455	131/7135	0.0191901	0.0191901	0.257382	ADA2/AMCF-II/BAMBI/CCL11/CCL19/CCL2/CCL8/CXCL10/CXCL9/GCG/GNA11/GNA14/NTS/TULP3/WNT2B	15	MF
GO:0001227	DNA-binding transcription repressor activity, RNA polymerase II-specific	10/455	75/7135	0.0199726	0.0199726	0.257382	HEYL/HOXB8/NFIL3/PRDM1/PROX1/SNAI2/TBX2/THAP11/ZBED2/ZBTB33	10	MF
GO:0003713	transcription coactivator activity	10/455	75/7135	0.0199726	0.0199726	0.257382	ARL2BP/CTNNB1/FHL5/LMO2/MAML1/MED30/MYOCD/NCOA3/PSMC3IP/SLC30A9	10	MF
GO:0004722	protein serine/threonine phosphatase activity	6/455	35/7135	0.0217598	0.0217598	0.268152	CDKN3/CTDSP2/DUSP10/PPP1CB/PPP1CC/PTEN	6	MF
GO:0030515	snoRNA binding	3/455	10/7135	0.0220694	0.0220694	0.268152	NHP2/NOP10/NUDT4	3	MF
GO:0004721	phosphoprotein phosphatase activity	9/455	66/7135	0.023281	0.023281	0.271459	CDKN3/CTDSP2/DUSP10/PPP1CB/PPP1CC/PTEN/PTP4A1/PTPN13/STYX	9	MF
GO:0001217	DNA-binding transcription repressor activity	10/455	77/7135	0.0236183	0.0236183	0.271459	HEYL/HOXB8/NFIL3/PRDM1/PROX1/SNAI2/TBX2/THAP11/ZBED2/ZBTB33	10	MF
GO:0016765	transferase activity, transferring alkyl or aryl (other than methyl) groups	6/455	36/7135	0.0247541	0.0247541	0.277026	GSTA1/LOC100153094/MAT2A/MGST1/PDSS2/TRMT12	6	MF
GO:0019207	kinase regulator activity	10/455	79/7135	0.0277218	0.0277218	0.302284	BMPR2/CCNG1/CDKN2C/CISH/DAZAP2/IGF2/PKIB/PRKAG3/PRKAR2A/STRADB	10	MF
GO:0140303	intramembrane lipid transporter activity	3/455	11/7135	0.0289367	0.0289367	0.305148	ATP8B2/PLSCR1/PLSCR4	3	MF
GO:0043539	protein serine/threonine kinase activator activity	4/455	19/7135	0.0294196	0.0294196	0.305148	BMPR2/DAZAP2/IGF2/STRADB	4	MF
GO:0019887	protein kinase regulator activity	9/455	70/7135	0.0327459	0.0327459	0.331562	BMPR2/CCNG1/CDKN2C/DAZAP2/IGF2/PKIB/PRKAG3/PRKAR2A/STRADB	9	MF
GO:0030276	clathrin binding	4/455	20/7135	0.0349779	0.0349779	0.345926	AP1S2/AP2B1/CLTC/NCALD	4	MF
GO:0097153	cysteine-type endopeptidase activity involved in apoptotic process	3/455	12/7135	0.0367975	0.0367975	0.349058	CASP3/CASP8/CASP9	3	MF
GO:0016791	phosphatase activity	13/455	118/7135	0.0369363	0.0369363	0.349058	CDKN3/CTDSP2/DUSP10/EPHX2/INPP5F/PLPP1/PPP1CB/PPP1CC/PSPH/PTEN/PTP4A1/PTPN13/STYX	13	MF
GO:0005544	calcium-dependent phospholipid binding	4/455	22/7135	0.0477949	0.0477949	0.441857	ANXA1/ANXA4/ANXA5/CPNE8	4	MF
