# Supplementary material for: The Metabolic Pathway of Bile Secretion Is Vulnerable to Salmonella enterica Exposure in Porcine Intestinal Epithelial Cells
Source: Animals (Basel). 2024 Mar 3;14(5):789. doi: 10.3390/ani14050789 (PMC10931422; doi:10.3390/ani14050789)
Supplement: Supplementary file 1 [file animals-14-00789-s001.zip › Table S7. Signaling pathway associate with up and DOWN-regulated genes between LPS treated and Control group .xlsx]

## Sheet: Up-regulated genes enriched
ID	Description	GeneRatio	BgRatio	pvalue	p.adjust	qvalue	geneID	Count
ssc04978	Mineral absorption	16/389	54/9206	3.68004e-10	3.68004e-10	9.56811e-08	ATOX1/ATP1A2/ATP1B3/ATP2B1/ATP7B/CLCN2/CYBRD1/MT-2B/S100G/SLC11A2/SLC40A1/SLC46A1/SLC8A3/SLC9A3/TRPV6/VDR	16
ssc04977	Vitamin digestion and absorption	10/389	25/9206	2.99426e-08	2.99426e-08	3.89253e-06	APOA1/APOA4/FOLH1B/LRAT/SCARB1/SLC19A1/SLC19A3/SLC46A1/SLC52A3/SLC5A6	10
ssc04976	Bile secretion	16/389	85/9206	4.118e-07	4.118e-07	3.56894e-05	ABCC2/ABCC3/ABCC4/ADCY7/ADCY8/ADCY9/AQP8/ATP1A2/ATP1B3/LOC100153359/NR0B2/SCARB1/SCT/SLC2A1/SLC9A3/UGT2B31	16
ssc04610	Complement and coagulation cascades	14/389	80/9206	5.4078e-06	5.4078e-06	0.000297002	C2/C3/C4BPB/C9/CFB/CFD/F10/F12/F7/MASP1/PROC/SERPINA1/SERPINF2/THBD	14
ssc04141	Protein processing in endoplasmic reticulum	21/389	165/9206	5.71157e-06	5.71157e-06	0.000297002	BAK1/BCAP31/CALR/DERL1/DERL3/DNAJB12/DNAJC3/ERO1B/HSPA4L/MAN1A2/MAPK10/PDIA3/PDIA4/RRBP1/SEC61A1/SEC61A2/SIL1/SYVN1/TUSC3/TXNDC5/WFS1	21
ssc04514	Cell adhesion molecules	20/389	155/9206	7.7396e-06	7.7396e-06	0.000335383	CD6/CD99L2/CDH1/CLDN15/CLDN2/CLDN4/CLDN5/CNTN1/ESAM/GLG1/ICOSLG/JAM3/LOC100621559/NCAM1/NECTIN2/NFASC/PTPRM/SDC3/SELP/VSIR	20
ssc00830	Retinol metabolism	12/389	67/9206	1.99293e-05	1.99293e-05	0.000740232	ADH4/BCO1/CYP1A1/CYP2C42/CYP3A22/CYP3A29/CYP3A46/LRAT/RDH5/RETSAT/SDR16C5/UGT2B31	12
ssc04972	Pancreatic secretion	14/389	99/9206	6.55805e-05	6.55805e-05	0.00213137	ADCY7/ADCY8/ADCY9/ATP1A2/ATP1B3/ATP2A2/ATP2B1/BST1/CCK/KCNQ1/PLA2G3/PLCB2/PNLIPRP2/SCT	14
ssc04145	Phagosome	17/389	145/9206	0.00012593	0.00012593	0.00356103	ATP6V0A1/ATP6V1C2/C3/CALR/CTSL/CYBA/ITGB5/LOC100624785/LOC396781/SCARB1/SEC61A1/SEC61A2/SFTPD/TAP1/TAP2/THBS2/THBS4	17
ssc05204	Chemical carcinogenesis - DNA adducts	10/389	58/9206	0.000136963	0.000136963	0.00356103	CYP1A1/CYP2C42/CYP3A22/CYP3A29/CYP3A46/GSTK1/HSD11B1/LOC100526118/LOC100622246/UGT2B31	10
ssc04911	Insulin secretion	12/389	85/9206	0.000220065	0.000220065	0.00520154	ADCY7/ADCY8/ADCY9/ATP1A2/ATP1B3/CCK/CREB3L3/GIP/KCNMB1/PDX1/PLCB2/SLC2A1	12
ssc04974	Protein digestion and absorption	13/389	104/9206	0.000415862	0.000415862	0.00901034	ATP1A2/ATP1B3/COL17A1/COL4A2/COL4A4/COL4A5/COL9A2/KCNJ13/KCNK5/KCNQ1/SLC36A1/SLC8A3/SLC9A3	13
ssc04024	cAMP signaling pathway	21/389	225/9206	0.00053775	0.00053775	0.010755	ABCC4/ADCY7/ADCY8/ADCY9/ATP1A2/ATP1B3/ATP2A2/ATP2B1/CHRM2/CREB3L3/EDN2/EDN3/GHRL/GIP/GIPR/LOC100153359/MAPK10/PIK3CD/SST/SSTR1/VIP	21
ssc04979	Cholesterol metabolism	8/389	50/9206	0.00106797	0.00106797	0.0198338	APOA1/APOA4/APOC3/APOE/LRPAP1/SCARB1/SOAT1/STARD3	8
ssc04142	Lysosome	14/389	130/9206	0.00115028	0.00115028	0.0199382	ATP6V0A1/CTNS/CTSF/CTSL/CTSZ/GUSB/HEXA/HYAL2/IDUA/LAPTM4B/MFSD8/SLC11A2/SLC17A5/SMPD1	14
ssc04512	ECM-receptor interaction	11/389	90/9206	0.00137402	0.00137402	0.0223279	COL4A2/COL4A4/COL4A5/COL9A2/DMP1/ITGA3/ITGB5/LAMC1/THBS2/THBS4/TNXB	11
ssc04080	Neuroactive ligand-receptor interaction	28/389	368/9206	0.00181425	0.00181425	0.0277474	APLNR/C3/CCK/CHRM2/EDN2/EDN3/GABRA4/GHRL/GIP/GIPR/GPR35/GRP/LPAR3/LPAR6/MLN/P2RX4/P2RX5/P2RY2/P2RY8/PENK/PGRMC2/PTGER1/SCT/SST/SSTR1/TAC1/UCN3/VIP	28
ssc01523	Antifolate resistance	6/389	32/9206	0.00194923	0.00194923	0.0281555	ABCC2/ABCC3/ABCC4/LOC100153359/SLC19A1/SLC46A1	6
ssc00564	Glycerophospholipid metabolism	11/389	97/9206	0.00252455	0.00252455	0.0345465	ACHE/AGPAT3/CDS2/GPAT3/GPD1/LOC102158609/LPCAT3/LPGAT1/MBOAT7/PHOSPHO1/PLA2G3	11
ssc00604	Glycosphingolipid biosynthesis - ganglio series	4/389	15/9206	0.00295612	0.00295612	0.0384296	B3GALT4/B4GALNT1/HEXA/ST6GALNAC4	4
ssc04918	Thyroid hormone synthesis	9/389	73/9206	0.00346509	0.00346509	0.0429012	ADCY7/ADCY8/ADCY9/ATP1A2/ATP1B3/CREB3L3/IYD/PDIA4/PLCB2	9
ssc04971	Gastric acid secretion	9/389	74/9206	0.00380175	0.00380175	0.0449298	ADCY7/ADCY8/ADCY9/ATP1A2/ATP1B3/GAST/KCNQ1/PLCB2/SST	9
ssc04970	Salivary secretion	10/389	90/9206	0.00452902	0.00452902	0.0478318	ADCY7/ADCY8/ADCY9/ATP1A2/ATP1B3/ATP2B1/BST1/DMBT1/PLCB2/TRPV6	10
ssc04961	Endocrine and other factor-regulated calcium reabsorption	7/389	50/9206	0.00473369	0.00473369	0.0478318	ADCY9/ATP1A2/ATP1B3/ATP2B1/PLCB2/SLC8A3/VDR	7
ssc00140	Steroid hormone biosynthesis	8/389	63/9206	0.00478318	0.00478318	0.0478318	AKR1C1/CYP1A1/CYP2C42/CYP3A22/CYP3A29/CYP3A46/HSD11B1/UGT2B31	8
ssc04612	Antigen processing and presentation	8/389	63/9206	0.00478318	0.00478318	0.0478318	CALR/CD74/CTSL/LOC100621559/PDIA3/TAP1/TAP2/TAPBP	8
ssc02010	ABC transporters	7/389	51/9206	0.00529254	0.00529254	0.0509652	ABCC2/ABCC3/ABCC4/ABCD1/LOC100153359/TAP1/TAP2	7
ssc04020	Calcium signaling pathway	20/389	256/9206	0.005908	0.005908	0.05374	ADCY7/ADCY8/ADCY9/ATP2A2/ATP2B1/CASQ1/CHRM2/ERBB3/FLT1/HRC/LOC100621559/LOC396781/MET/P2RX4/P2RX5/PLCB2/PTGER1/SLC8A3/STIM1/STIM2	20
ssc00531	Glycosaminoglycan degradation	4/389	18/9206	0.00599408	0.00599408	0.05374	GUSB/HEXA/HYAL2/IDUA	4
ssc04151	PI3K-Akt signaling pathway	25/389	351/9206	0.00728452	0.00728452	0.0631325	CHRM2/COL4A2/COL4A4/COL4A5/COL9A2/CREB3L3/EFNA1/EFNA5/ERBB3/FLT1/IL6R/ITGA3/ITGB5/JAK3/LAMC1/LOC396781/LPAR3/LPAR6/MET/PCK2/PIK3CD/SGK2/THBS2/THBS4/TNXB	25
ssc05144	Malaria	7/389	55/9206	0.00803332	0.00803332	0.0658427	LOC100621559/LOC110259958/MET/SELP/THBS2/THBS4/TLR9	7
ssc04725	Cholinergic synapse	11/389	113/9206	0.00810372	0.00810372	0.0658427	ACHE/ADCY7/ADCY8/ADCY9/CHRM2/CREB3L3/KCNQ1/KCNQ5/PIK3CD/PLCB2/SLC18A3	11
ssc04913	Ovarian steroidogenesis	7/389	56/9206	0.00885712	0.00885712	0.0697834	ADCY7/ADCY8/ADCY9/AKR1C1/CYP1A1/LOC110255332/SCARB1	7
ssc04975	Fat digestion and absorption	6/389	44/9206	0.00992422	0.00992422	0.0758911	APOA1/APOA4/MOGAT2/PLA2G3/PNLIPRP2/SCARB1	6
ssc04261	Adrenergic signaling in cardiomyocytes	13/389	149/9206	0.0103079	0.0103079	0.0765728	ADCY7/ADCY8/ADCY9/ATP1A2/ATP1B3/ATP2A2/ATP2B1/CACNA2D1/CREB3L3/KCNQ1/PLCB2/PPP1R1A/SLC8A3	13
ssc00980	Metabolism of xenobiotics by cytochrome P450	7/389	58/9206	0.0106882	0.0106882	0.0771923	ADH4/CYP1A1/GSTK1/HSD11B1/LOC100526118/LOC100622246/UGT2B31	7
ssc04964	Proximal tubule bicarbonate reclamation	4/389	22/9206	0.0125434	0.0125434	0.0881426	ATP1A2/ATP1B3/PCK2/SLC9A3	4
ssc05150	Staphylococcus aureus infection	9/389	92/9206	0.0154162	0.0154162	0.105479	C2/C3/CFB/CFD/KRT18/LOC100621559/LOC396781/MASP1/SELP	9
ssc04925	Aldosterone synthesis and secretion	9/389	93/9206	0.016455	0.016455	0.109326	ADCY7/ADCY8/ADCY9/ATP1A2/ATP1B3/ATP2B1/CREB3L3/PLCB2/SCARB1	9
ssc05340	Primary immunodeficiency	5/389	36/9206	0.0168195	0.0168195	0.109326	ADA/JAK3/LOC396781/TAP1/TAP2	5
ssc04672	Intestinal immune network for IgA production	6/389	50/9206	0.0180936	0.0180936	0.111052	CCL25/CCR10/ICOSLG/LOC100621559/LOC396781/TNFSF13	6
ssc05414	Dilated cardiomyopathy	9/389	95/9206	0.0186849	0.0186849	0.111052	ADCY7/ADCY8/ADCY9/ATP2A2/CACNA2D1/ITGA3/ITGB5/LOC396781/SLC8A3	9
ssc00591	Linoleic acid metabolism	5/389	37/9206	0.0187934	0.0187934	0.111052	CYP2C42/CYP3A22/CYP3A29/CYP3A46/PLA2G3	5
ssc05143	African trypanosomiasis	5/389	37/9206	0.0187934	0.0187934	0.111052	APOA1/LOC110259958/LOC396781/PLCB2/TLR9	5
ssc04360	Axon guidance	14/389	182/9206	0.0219865	0.0219865	0.127033	EFNA1/EFNA5/EPHA3/EPHB3/MET/NTN1/PIK3CD/PLXNA1/PLXNA2/RHOD/SEMA4F/SEMA5A/SEMA6A/SEMA6C	14
ssc05146	Amoebiasis	9/389	99/9206	0.0237899	0.0237899	0.134465	C9/COL4A2/COL4A4/COL4A5/LAMC1/LOC396781/MUC2/PIK3CD/PLCB2	9
ssc00600	Sphingolipid metabolism	6/389	54/9206	0.0255692	0.0255692	0.141447	B4GALNT1/HEXA/SGPP2/SMPD1/SMPD3/UGCG	6
ssc04935	Growth hormone synthesis, secretion and action	10/389	118/9206	0.027406	0.027406	0.148449	ADCY7/ADCY8/ADCY9/CREB3L3/GHRL/MAPK10/PIK3CD/PLCB2/SST/SSTR1	10
ssc04216	Ferroptosis	5/389	42/9206	0.0309296	0.0309296	0.161753	GCLC/LPCAT3/SLC11A2/SLC40A1/STEAP3	5
ssc04148	Efferocytosis	12/389	155/9206	0.0311063	0.0311063	0.161753	ATP2A2/BSG/CALR/CX3CL1/DUSP8/ITGB5/P2RY2/PPARG/SLC16A1/SLC2A1/TYRO3/VPS18	12
ssc04015	Rap1 signaling pathway	15/389	213/9206	0.0362384	0.0362384	0.184745	ADCY7/ADCY8/ADCY9/CDH1/EFNA1/EFNA5/FLT1/LAT/LOC100621559/LPAR3/MET/PIK3CD/PLCB2/RGS14/SKAP1	15
ssc00590	Arachidonic acid metabolism	7/389	75/9206	0.0385291	0.0385291	0.192646	AKR1C1/CYP2C42/GGT1/LOC100622246/PLA2G3/PTGDS/PTGIS	7
ssc00790	Folate biosynthesis	4/389	31/9206	0.0401195	0.0401195	0.196203	AKR1C1/LOC100522404/LOC100622246/TH	4
ssc04750	Inflammatory mediator regulation of TRP channels	9/389	109/9206	0.0407499	0.0407499	0.196203	ADCY7/ADCY8/ADCY9/ASIC3/CYP2C42/MAPK10/P2RY2/PIK3CD/PLCB2	9
ssc05323	Rheumatoid arthritis	8/389	93/9206	0.0425053	0.0425053	0.200934	ATP6V0A1/ATP6V1C2/CCL20/CTSL/FLT1/LOC100621559/LOC396781/TNFSF13	8
ssc04510	Focal adhesion	14/389	200/9206	0.0439231	0.0439231	0.20339	COL4A2/COL4A4/COL4A5/COL9A2/FLT1/ITGA3/ITGB5/LAMC1/MAPK10/MET/PIK3CD/THBS2/THBS4/TNXB	14
ssc04062	Chemokine signaling pathway	13/389	182/9206	0.0445894	0.0445894	0.20339	ADCY7/ADCY8/ADCY9/CCL20/CCL21/CCL25/CCR10/CCR6/CX3CL1/JAK3/NFKBIB/PIK3CD/PLCB2	13
ssc04927	Cortisol synthesis and secretion	6/389	62/9206	0.0460912	0.0460912	0.203775	ADCY7/ADCY8/ADCY9/CREB3L3/PLCB2/SCARB1	6
ssc04926	Relaxin signaling pathway	10/389	129/9206	0.0462412	0.0462412	0.203775	ADCY7/ADCY8/ADCY9/COL4A2/COL4A4/COL4A5/CREB3L3/MAPK10/PIK3CD/PLCB2	10
ssc04973	Carbohydrate digestion and absorption	5/389	47/9206	0.0470871	0.0470871	0.204044	ATP1A2/ATP1B3/PIK3CD/PLCB2/SLC37A4	5

## Sheet: Down-regulated genes enriched
ID	Description	GeneRatio	BgRatio	pvalue	p.adjust	qvalue	geneID	Count
ssc05132	Salmonella infection	35/448	253/9206	1.75278e-08	1.75278e-08	3.74542e-06	ACBD3/ACTR1B/ARHGEF26/ARPC2/ARPC5/ARPC5L/CASP3/CASP7/CASP8/CDC42/CHUK/CTNNB1/CYTH4/DCTN6/DYNLRB2/FYCO1/KPNA1/LOC733637/LY96/MAP2K1/MRLC2/MYD88/NFKB1/NLRP3/PFN2/RAB5B/RAB7B/RAF1/RELA/RHOG/RHOJ/TCF7L1/TUBA1B/TUBAL3/WASF3	35
ssc05016	Huntington disease	37/448	308/9206	2.8392e-07	2.8392e-07	3.03347e-05	ACTR1B/AP2B1/AP2M1/ATP6/CASP3/CASP8/CASP9/CLTC/COX1/COX2/COX3/CREB5/CYTB/DCTN6/DNAH9/GPX1/GPX8/HDAC1/ND1/ND2/ND3/ND4/ND4L/ND5/ND6/POLR2K/PSMA1/PSMA3/PSMA4/PSMD6/SLC25A5/SOD2/TBP/TBPL1/TFAM/TUBA1B/TUBAL3	37
ssc05164	Influenza A	24/448	163/9206	1.04658e-06	1.04658e-06	7.01379e-05	CALCOCO2/CASP3/CASP8/CASP9/CCL2/CHUK/CXCL10/JAK1/KPNA1/MAP2K1/MYD88/NFKB1/NLRP3/NXT2/RAB11A/RAF1/RELA/RNASEL/SLA-DMB/SLA-DQA1/SLA-DRA/SLC25A5/STAT1/TLR3	24
ssc05165	Human papillomavirus infection	37/448	328/9206	1.35523e-06	1.35523e-06	7.01379e-05	APC/APC2/ATP6V0A4/ATP6V1A/ATP6V1D/ATP6V1G1/CASP3/CASP8/CDC42/CHUK/COL6A5/CREB5/CTNNB1/EGFR/GRB2/HDAC1/HES7/HEYL/JAK1/LAMA1/MAML1/MAP2K1/NFKB1/NRAS/PARD6G/PPP2CB/PPP2R3C/PPP2R5D/PTEN/RAF1/RELA/STAT1/TBP/TBPL1/TCF7L1/TLR3/WNT2B	37
ssc05208	Chemical carcinogenesis - reactive oxygen species	29/448	227/9206	1.64116e-06	1.64116e-06	7.01379e-05	ATP6/CHUK/COX1/COX2/COX3/CYTB/EGFR/EPHX2/GRB2/GSTA1/HIF1A/LOC100153094/MAP2K1/MGST1/NCF2/ND1/ND2/ND3/ND4/ND4L/ND5/ND6/NFKB1/NRAS/PTEN/RAF1/RELA/SLC25A5/SOD2	29
ssc05235	PD-L1 expression and PD-1 checkpoint pathway in cancer	17/448	95/9206	2.71191e-06	2.71191e-06	9.65821e-05	CD3D/CHUK/EGFR/HIF1A/JAK1/MAP2K1/MAP3K3/MYD88/NFATC3/NFKB1/NRAS/PPP3R1/PTEN/RAF1/RELA/STAT1/STAT3	17
ssc05022	Pathways of neurodegeneration - multiple diseases	46/448	474/9206	4.83179e-06	4.83179e-06	0.000147497	ACTR1B/APC/APC2/ATP6/ATXN3/CASP3/CASP7/CASP8/CASP9/CHMP2B/COX1/COX2/COX3/CTNNB1/CYTB/DCTN6/DNAH9/GP91-PHOX/GPX1/GPX8/MAP2K1/MAPT/ND1/ND2/ND3/ND4/ND4L/ND5/ND6/NFKB1/NRAS/PPP3R1/PSMA1/PSMA3/PSMA4/PSMD6/RAB1A/RAF1/RELA/RYR2/SLC25A5/TUBA1B/TUBAL3/UBB/UBE2L6/WNT2B	46
ssc05415	Diabetic cardiomyopathy	26/448	205/9206	6.52677e-06	6.52677e-06	0.000174333	ATP6/COX1/COX2/COX3/CYTB/GP91-PHOX/GSR/LOC100511343/NCF2/ND1/ND2/ND3/ND4/ND4L/ND5/ND6/NFKB1/PPP1CB/PPP1CC/PTEN/RELA/RYR2/SLC25A5/SMAD3/TBC1D4/TNNI3	26
ssc05010	Alzheimer disease	38/448	384/9206	2.17678e-05	2.17678e-05	0.000516827	ADAM10/APC/APC2/ATP6/CASP3/CASP7/CASP8/CASP9/CHUK/COX1/COX2/COX3/CTNNB1/CYTB/GP91-PHOX/LPL/MAP2K1/MAPT/ND1/ND2/ND3/ND4/ND4L/ND5/ND6/NFKB1/NRAS/PPP3R1/PSMA1/PSMA3/PSMA4/PSMD6/RAF1/RELA/SLC25A5/TUBA1B/TUBAL3/WNT2B	38
ssc05145	Toxoplasmosis	16/448	106/9206	4.87773e-05	4.87773e-05	0.00104229	CASP3/CASP8/CASP9/CHUK/IL10/JAK1/LAMA1/LY96/MYD88/NFKB1/RELA/SLA-DMB/SLA-DQA1/SLA-DRA/STAT1/STAT3	16
ssc05215	Prostate cancer	15/448	96/9206	5.55622e-05	5.55622e-05	0.00107934	CASP9/CHUK/CREB5/CTNNB1/EGFR/ETV5/GRB2/MAP2K1/MMP3/NFKB1/NRAS/PTEN/RAF1/RELA/TCF7L1	15
ssc04062	Chemokine signaling pathway	22/448	182/9206	7.02385e-05	7.02385e-05	0.00110492	AMCF-II/CCL11/CCL19/CCL2/CCL8/CDC42/CHUK/CXCL10/CXCL9/GNG10/GNG11/GNG2/GRB2/GRK5/MAP2K1/NFKB1/NRAS/RAF1/RELA/STAT1/STAT3/VAV1	22
ssc04145	Phagosome	19/448	145/9206	7.33669e-05	7.33669e-05	0.00110492	ATP6V0A4/ATP6V1A/ATP6V1D/ATP6V1G1/CD209/FCGR3A/GP91-PHOX/LOC100511343/MSR1/NCF2/OLR1/RAB5B/RAB7B/SLA-DMB/SLA-DQA1/SLA-DRA/TFRC/TUBA1B/TUBAL3	19
ssc05167	Kaposi sarcoma-associated herpesvirus infection	23/448	196/9206	7.67957e-05	7.67957e-05	0.00110492	CASP3/CASP8/CASP9/CHUK/CLEC2B/CTNNB1/GNG10/GNG11/GNG2/HIF1A/JAK1/MAP2K1/NFATC3/NFKB1/NRAS/PPP3R1/RAF1/RELA/STAT1/STAT3/TCF7L1/TLR3/UBB	23
ssc05160	Hepatitis C	20/448	158/9206	7.81465e-05	7.81465e-05	0.00110492	CASP3/CASP8/CASP9/CHUK/CTNNB1/CXCL10/EGFR/GRB2/JAK1/MAP2K1/NFKB1/NRAS/PPP2CB/RAF1/RELA/RNASEL/STAT1/STAT3/TLR3/YWHAB	20
ssc05014	Amyotrophic lateral sclerosis	35/448	364/9206	8.3426e-05	8.3426e-05	0.00110492	ACTR1B/ATP6/CASP3/CASP9/CHMP2B/COX1/COX2/COX3/CYTB/DCTN6/DNAH9/GPX1/GPX8/HNRNPA2B1/NCBP1/ND1/ND2/ND3/ND4/ND4L/ND5/ND6/NUP54/NUP62/NXT2/PFN2/PPP3R1/PSMA1/PSMA3/PSMA4/PSMD6/RAB1A/SRSF3/TUBA1B/TUBAL3	35
ssc05213	Endometrial cancer	11/448	58/9206	9.15518e-05	9.15518e-05	0.00110492	APC/APC2/CASP9/CTNNB1/EGFR/GRB2/MAP2K1/NRAS/PTEN/RAF1/TCF7L1	11
ssc05166	Human T-cell leukemia virus 1 infection	25/448	225/9206	9.30747e-05	9.30747e-05	0.00110492	ANAPC10/CD3D/CDKN2C/CHEK1/CHUK/CREB5/JAK1/MAD2L1/MAP2K1/MAP3K3/NFATC3/NFKB1/NRAS/PPP3R1/PTEN/RAN/RELA/SLA-DMB/SLA-DQA1/SLA-DRA/SLC25A5/SMAD3/SPI1/TBP/TBPL1	25
ssc04144	Endocytosis	26/448	240/9206	0.000103208	0.000103208	0.00116073	AP2B1/AP2M1/ARF4/ARPC2/ARPC5/ARPC5L/CAPZA1/CAPZA2/CDC42/CHMP1B/CHMP2B/CHMP5/CLTC/CYTH4/EGFR/GRK5/NEDD4/PARD6G/RAB11A/RAB35/RAB5B/SMAD3/SNX3/STAMBP/TFRC/TSG101	26
ssc04810	Regulation of actin cytoskeleton	25/448	228/9206	0.000115295	0.000115295	0.00123184	APC/APC2/ARPC2/ARPC5/ARPC5L/C7/CDC42/DIAPH3/EGFR/EZR/FGF21/FGF9/GNA12/LOC733637/MAP2K1/MRLC2/NRAS/PFN2/PIP4K2A/PPP1CB/PPP1CC/RAF1/RDX/SCIN/VAV1	25
ssc04390	Hippo signaling pathway	19/448	155/9206	0.00018042	0.00018042	0.00181405	AJUBA/APC/APC2/BMP5/BMPR2/CTNNB1/NKD1/PARD6G/PPP1CB/PPP1CC/PPP2CB/SAV1/SMAD3/SNAI2/TCF7L1/TEAD1/TEAD4/WNT2B/YWHAB	19
ssc05140	Leishmaniasis	12/448	73/9206	0.000186767	0.000186767	0.00181405	FCGR3A/GP91-PHOX/IL10/JAK1/MYD88/NCF2/NFKB1/RELA/SLA-DMB/SLA-DQA1/SLA-DRA/STAT1	12
ssc05212	Pancreatic cancer	12/448	74/9206	0.000213294	0.000213294	0.00198163	CASP9/CDC42/CHUK/EGFR/JAK1/MAP2K1/NFKB1/RAF1/RELA/SMAD3/STAT1/STAT3	12
ssc05221	Acute myeloid leukemia	11/448	66/9206	0.000303951	0.000303951	0.00260292	BCL2A1/CHUK/GRB2/MAP2K1/NFKB1/NRAS/RAF1/RELA/SPI1/STAT3/TCF7L1	11
ssc05020	Prion disease	27/448	272/9206	0.000325925	0.000325925	0.00260292	ATP6/C7/CASP3/CASP9/COX1/COX2/COX3/CREB5/CYTB/GP91-PHOX/NCF2/ND1/ND2/ND3/ND4/ND4L/ND5/ND6/PPP3R1/PSMA1/PSMA3/PSMA4/PSMD6/RYR2/SLC25A5/TUBA1B/TUBAL3	27
ssc00190	Oxidative phosphorylation	17/448	137/9206	0.000337574	0.000337574	0.00260292	ATP6/ATP6V0A4/ATP6V1A/ATP6V1D/ATP6V1G1/COX1/COX2/COX3/CYTB/ND1/ND2/ND3/ND4/ND4L/ND5/ND6/PPA1	17
ssc05210	Colorectal cancer	13/448	89/9206	0.000343392	0.000343392	0.00260292	APC/APC2/APPL1/CASP3/CASP9/CTNNB1/EGFR/GRB2/MAP2K1/NRAS/RAF1/SMAD3/TCF7L1	13
ssc04660	T cell receptor signaling pathway	16/448	125/9206	0.000352213	0.000352213	0.00260292	CD3D/CDC42/CHUK/GRB2/IL10/MAP2K1/NFATC3/NFKB1/NRAS/PPP2CB/PPP2R3C/PPP2R5D/PPP3R1/RAF1/RELA/VAV1	16
ssc05417	Lipid and atherosclerosis	23/448	217/9206	0.000353254	0.000353254	0.00260292	CASP3/CASP7/CASP8/CASP9/CCL2/CDC42/CHUK/GP91-PHOX/LOC100511343/LY96/MMP3/MYD88/NCF2/NFATC3/NFKB1/NLRP3/NRAS/OLR1/PPP3R1/RELA/SOD2/STAT3/VAV1	23
ssc05161	Hepatitis B	19/448	167/9206	0.000472671	0.000472671	0.00336674	CASP3/CASP8/CASP9/CHUK/CREB5/GRB2/JAK1/MAP2K1/MYD88/NFATC3/NFKB1/NRAS/RAF1/RELA/SMAD3/STAT1/STAT3/TLR3/YWHAB	19
ssc04658	Th1 and Th2 cell differentiation	13/448	93/9206	0.000531138	0.000531138	0.00366116	CD3D/CHUK/JAK1/MAF/MAML1/NFATC3/NFKB1/PPP3R1/RELA/SLA-DMB/SLA-DQA1/SLA-DRA/STAT1	13
ssc05152	Tuberculosis	20/448	185/9206	0.000656938	0.000656938	0.00438679	ATP6V0A4/CASP3/CASP8/CASP9/CD209/CEBPB/FCGR3A/IL10/JAK1/MYD88/NFKB1/PPP3R1/RAB5B/RAF1/RELA/RFX5/SLA-DMB/SLA-DQA1/SLA-DRA/STAT1	20
ssc05163	Human cytomegalovirus infection	23/448	228/9206	0.000711937	0.000711937	0.00460999	CASP3/CASP8/CASP9/CCL2/CHUK/CREB5/CTNNB1/EGFR/GNA11/GNA12/GNG10/GNG11/GNG2/GRB2/JAK1/MAP2K1/NFATC3/NFKB1/NRAS/PPP3R1/RAF1/RELA/STAT3	23
ssc04659	Th17 cell differentiation	14/448	111/9206	0.00094167	0.00094167	0.00591823	CD3D/CHUK/HIF1A/JAK1/NFATC3/NFKB1/PPP3R1/RELA/SLA-DMB/SLA-DQA1/SLA-DRA/SMAD3/STAT1/STAT3	14
ssc04657	IL-17 signaling pathway	12/448	89/9206	0.00119241	0.00119241	0.00727999	AMCF-II/CASP3/CASP8/CCL11/CCL2/CEBPB/CHUK/CXCL10/MAPK6/MMP3/NFKB1/RELA	12
ssc04218	Cellular senescence	17/448	154/9206	0.00129821	0.00129821	0.00770574	CHEK1/LIN54/MAP2K1/NFATC3/NFKB1/NRAS/PPP1CB/PPP1CC/PPP3R1/PTEN/RAD1/RAF1/RELA/SLC25A5/SMAD3/TRPV4/ZFP36L2	17
ssc05321	Inflammatory bowel disease	10/448	67/9206	0.0013781	0.0013781	0.0079589	IL10/MAF/NFKB1/RELA/SLA-DMB/SLA-DQA1/SLA-DRA/SMAD3/STAT1/STAT3	10
ssc04662	B cell receptor signaling pathway	11/448	79/9206	0.00144831	0.00144831	0.00814424	BANK1/CHUK/GRB2/MAP2K1/NFATC3/NFKB1/NRAS/PPP3R1/RAF1/RELA/VAV1	11
ssc04068	FoxO signaling pathway	15/448	130/9206	0.00157881	0.00157881	0.00865041	ATG12/CHUK/EGFR/GRB2/IL10/IL7R/MAP2K1/NRAS/PRKAG3/PTEN/RAF1/SKP2/SMAD3/SOD2/STAT3	15
ssc04666	Fc gamma R-mediated phagocytosis	12/448	94/9206	0.0019265	0.0019265	0.0102916	ARPC2/ARPC5/ARPC5L/CDC42/FCGR3A/MAP2K1/PLA2G4A/PLPP1/RAF1/SCIN/VAV1/WASF3	12
ssc05134	Legionellosis	9/448	60/9206	0.00228517	0.00228517	0.0119099	CASP3/CASP7/CASP8/CASP9/MYD88/NFKB1/RAB1A/RAB1B/RELA	9
ssc05205	Proteoglycans in cancer	20/448	206/9206	0.00245797	0.00245797	0.0122947	CASP3/CDC42/CTNNB1/EGFR/EZR/FRS2/GRB2/HIF1A/HPSE2/IGF2/MAP2K1/NRAS/PDCD4/PPP1CB/PPP1CC/RAF1/RDX/STAT3/VAV1/WNT2B	20
ssc04210	Apoptosis	15/448	136/9206	0.00247408	0.00247408	0.0122947	BCL2A1/CASP3/CASP7/CASP8/CASP9/CHUK/ENDOG/MAP2K1/NFKB1/NRAS/PTPN13/RAF1/RELA/TUBA1B/TUBAL3	15
ssc04014	Ras signaling pathway	22/448	236/9206	0.00255142	0.00255142	0.0123909	CDC42/CHUK/EGFR/FGF21/FGF9/GNG10/GNG11/GNG2/GRB2/IGF2/MAP2K1/NFKB1/NRAS/PLA2G4A/RAB5B/RAF1/RALGAPA2/RASA1/RASA3/RASGRF2/RELA/RGL1	22
ssc04668	TNF signaling pathway	13/448	111/9206	0.00277938	0.00277938	0.0128421	AMCF-II/CASP3/CASP7/CASP8/CCL2/CEBPB/CHUK/CREB5/CXCL10/MAP2K1/MMP3/NFKB1/RELA	13
ssc05310	Asthma	6/448	30/9206	0.00281238	0.00281238	0.0128421	CCL11/IL10/MS4A2/SLA-DMB/SLA-DQA1/SLA-DRA	6
ssc05012	Parkinson disease	24/448	268/9206	0.00282463	0.00282463	0.0128421	ATP6/CASP3/CASP9/COX1/COX2/COX3/CYTB/MAPT/ND1/ND2/ND3/ND4/ND4L/ND5/ND6/PSMA1/PSMA3/PSMA4/PSMD6/SLC25A5/TUBA1B/TUBAL3/UBB/UBE2L6	24
ssc05133	Pertussis	10/448	74/9206	0.00294891	0.00294891	0.0131278	AMCF-II/C1S/CASP3/CASP7/IL10/LY96/MYD88/NFKB1/NLRP3/RELA	10
ssc04150	mTOR signaling pathway	16/448	153/9206	0.00310563	0.00310563	0.0135433	ATP6V1A/ATP6V1D/ATP6V1G1/CHUK/GRB2/LAMTOR3/MAP2K1/NRAS/PTEN/RAF1/RNF152/RRAGA/RRAGB/SKP2/STRADB/WNT2B	16
ssc04623	Cytosolic DNA-sensing pathway	10/448	76/9206	0.003594	0.003594	0.0153596	CASP3/CASP7/CASP8/CHUK/CXCL10/NFKB1/NLRP3/POLR2K/POLR3K/RELA	10
ssc05135	Yersinia infection	15/448	144/9206	0.00428561	0.00428561	0.0178414	ARPC2/ARPC5/ARPC5L/CCL2/CDC42/CHUK/IL10/MAP2K1/MYD88/NFATC3/NFKB1/NLRP3/RELA/RHOG/VAV1	15
ssc03320	PPAR signaling pathway	10/448	78/9206	0.00434627	0.00434627	0.0178414	ACADL/ACADM/FABP2/FABP5/FABP6/LOC100511343/LPL/OLR1/PLIN2/SCP2	10
ssc05416	Viral myocarditis	9/448	66/9206	0.0044252	0.0044252	0.0178414	CASP3/CASP8/CASP9/EIF4G2/LAMA1/SGCG/SLA-DMB/SLA-DQA1/SLA-DRA	9
ssc05224	Breast cancer	15/448	145/9206	0.0045734	0.0045734	0.0180975	APC/APC2/CTNNB1/EGFR/FGF21/FGF9/GRB2/HEYL/MAP2K1/NCOA3/NRAS/PTEN/RAF1/TCF7L1/WNT2B	15
ssc04010	MAPK signaling pathway	25/448	295/9206	0.00481023	0.00481023	0.0185723	CASP3/CDC42/CHUK/DUSP10/EGFR/FGF21/FGF9/GNA12/GRB2/IGF2/LAMTOR3/MAP2K1/MAP3K3/MAPKAPK3/MAPT/MYD88/NFATC3/NFKB1/NRAS/PLA2G4A/PPP3R1/RAF1/RASA1/RASGRF2/RELA	25
ssc04625	C-type lectin receptor signaling pathway	12/448	105/9206	0.00486722	0.00486722	0.0185723	CASP8/CD209/CHUK/IL10/NFATC3/NFKB1/NLRP3/NRAS/PPP3R1/RAF1/RELA/STAT1	12
ssc05203	Viral carcinogenesis	18/448	192/9206	0.00571839	0.00571839	0.0212908	CASP3/CASP8/CDC42/CHEK1/CREB5/GRB2/GTF2E1/HDAC1/JAK1/NFKB1/NRAS/RELA/SCIN/SKP2/STAT3/TBP/TBPL1/YWHAB	18
ssc05225	Hepatocellular carcinoma	16/448	163/9206	0.00577894	0.00577894	0.0212908	APC/APC2/CTNNB1/EGFR/GRB2/GSTA1/IGF2/LOC100153094/MAP2K1/MGST1/NRAS/PTEN/RAF1/SMAD3/TCF7L1/WNT2B	16
ssc00480	Glutathione metabolism	8/448	57/9206	0.00598603	0.00598603	0.0213187	GPX1/GPX8/GSR/GSTA1/LAP3/LOC100153094/MGST1/PRDX6	8
ssc04370	VEGF signaling pathway	8/448	57/9206	0.00598603	0.00598603	0.0213187	CASP9/CDC42/MAP2K1/MAPKAPK3/NRAS/PLA2G4A/PPP3R1/RAF1	8
ssc04620	Toll-like receptor signaling pathway	12/448	108/9206	0.00610189	0.00610189	0.021375	CASP8/CHUK/CXCL10/CXCL9/JAK1/LY96/MAP2K1/MYD88/NFKB1/RELA/STAT1/TLR3	12
ssc05169	Epstein-Barr virus infection	19/448	209/9206	0.00637769	0.00637769	0.0219808	CASP3/CASP8/CASP9/CD3D/CHUK/CXCL10/HDAC1/JAK1/MYD88/NEDD4/NFKB1/PSMD6/RELA/SKP2/SLA-DMB/SLA-DQA1/SLA-DRA/STAT1/STAT3	19
ssc04917	Prolactin signaling pathway	9/448	71/9206	0.00719269	0.00719269	0.0243963	CISH/GRB2/MAP2K1/NFKB1/NRAS/RAF1/RELA/STAT1/STAT3	9
ssc05146	Amoebiasis	11/448	99/9206	0.00847478	0.00847478	0.0282957	CASP3/CD1D/GNA11/GNA14/IL10/LAMA1/NFKB1/RAB5B/RAB7B/RELA/SERPINB9	11
ssc05202	Transcriptional misregulation in cancer	17/448	185/9206	0.00865221	0.00865221	0.0284437	BCL11B/BCL2A1/BMI1/CDK14/CDKN2C/CEBPB/ETV5/HDAC1/HPGD/LMO2/LOC100627410/MAF/MLF1/MMP3/NFKB1/RELA/SPI1	17
ssc04714	Thermogenesis	20/448	232/9206	0.00923722	0.00923722	0.0299068	ATP6/COX1/COX2/COX3/CREB5/CYTB/FGF21/FRS2/GCG/GRB2/ND1/ND2/ND3/ND4/ND4L/ND5/ND6/NDUFAF1/NRAS/PRKAG3	20
ssc04550	Signaling pathways regulating pluripotency of stem cells	14/448	143/9206	0.0097105	0.0097105	0.0309699	APC/APC2/BMI1/BMPR2/CTNNB1/GRB2/JAK1/MAP2K1/NRAS/RAF1/SMAD3/SMAD9/STAT3/WNT2B	14
ssc05220	Chronic myeloid leukemia	9/448	75/9206	0.0102313	0.0102313	0.0319836	CHUK/GRB2/HDAC1/MAP2K1/NFKB1/NRAS/RAF1/RELA/SMAD3	9
ssc05170	Human immunodeficiency virus 1 infection	19/448	219/9206	0.0103277	0.0103277	0.0319836	AP1S2/CASP3/CASP8/CASP9/CD3D/CHEK1/CHUK/GNA11/GNG10/GNG11/GNG2/MAP2K1/MYD88/NFATC3/NFKB1/NRAS/PPP3R1/RAF1/RELA	19
ssc00920	Sulfur metabolism	3/448	10/9206	0.0106311	0.0106311	0.0324527	PAPSS1/PAPSS2/SUOX	3
ssc04919	Thyroid hormone signaling pathway	12/448	120/9206	0.0136941	0.0136941	0.0412142	CASP9/CTNNB1/DIO2/HDAC1/HIF1A/MAP2K1/MED30/NCOA3/NRAS/RAF1/STAT1/TBC1D4	12
ssc04520	Adherens junction	10/448	93/9206	0.0146567	0.0146567	0.0429028	CDC42/CTNNB1/EGFR/LOC733637/MRLC2/RADIL/SMAD3/SNAI2/TCF7L1/WASF3	10
ssc05323	Rheumatoid arthritis	10/448	93/9206	0.0146567	0.0146567	0.0429028	AMCF-II/ATP6V0A4/ATP6V1A/ATP6V1D/ATP6V1G1/CCL2/MMP3/SLA-DMB/SLA-DQA1/SLA-DRA	10
ssc04530	Tight junction	15/448	166/9206	0.015205	0.015205	0.0439062	ARPC2/ARPC5/ARPC5L/CD1D/CDC42/EZR/LOC733637/MRLC2/NEDD4/PARD6G/PPP2CB/PRKAG3/RDX/TUBA1B/TUBAL3	15
ssc05142	Chagas disease	11/448	108/9206	0.0157323	0.0157323	0.0448232	CASP8/CCL2/CD3D/CHUK/GNA11/GNA14/IL10/MYD88/NFKB1/PPP2CB/RELA	11
ssc05418	Fluid shear stress and atherosclerosis	13/448	139/9206	0.0177071	0.0177071	0.0497858	BMPR2/CCL2/CHUK/CTNNB1/GSTA1/LOC100153094/MEF2A/MGST1/NCF2/NFKB1/RELA/SUMO1/TRPV4	13
ssc04936	Alcoholic liver disease	13/448	140/9206	0.0186892	0.0186892	0.0512331	ACADM/ALDH2/C3AR1/CASP3/CASP8/CHUK/CTNNB1/LY96/MYD88/NFKB1/PRKAG3/RELA/TCF7L1	13
ssc04148	Efferocytosis	14/448	155/9206	0.0187014	0.0187014	0.0512331	ADAM10/CASP3/CEBPB/GULP1/HIF1A/IL10/LIPA/LOC100511343/LOC100513863/MAP2K1/NFATC3/P2RY12/RAB5B/RAB7B	14
ssc05206	MicroRNAs in cancer	21/448	267/9206	0.0202723	0.0202723	0.0545563	APC/APC2/BMI1/BMPR2/CASP3/CCNG1/EGFR/EZR/GRB2/HDAC1/LOC100154044/MAP2K1/NFKB1/NRAS/PDCD4/PTEN/RAF1/RDX/STAT3/ZEB2/ZFPM2	21
ssc05171	Coronavirus disease - COVID-19	20/448	251/9206	0.020425	0.020425	0.0545563	C1S/C3AR1/C7/CCL2/CHUK/CXCL10/EGFR/F13A1/GP91-PHOX/JAK1/LOC100525613/MMP3/MYD88/NFKB1/NLRP3/RELA/RPS27/STAT1/STAT3/TLR3	20
ssc04137	Mitophagy - animal	8/448	71/9206	0.0214081	0.0214081	0.0564762	CALCOCO2/CITED2/FUNDC1/HIF1A/NRAS/RAB7B/RELA/UBB	8
ssc04926	Relaxin signaling pathway	12/448	129/9206	0.0230223	0.0230223	0.0594545	ACTA2/CREB5/EGFR/GNG10/GNG11/GNG2/GRB2/MAP2K1/NFKB1/NRAS/RAF1/RELA	12
ssc04933	AGE-RAGE signaling pathway in diabetic complications	10/448	100/9206	0.0232963	0.0232963	0.0594545	CASP3/CCL2/CDC42/GP91-PHOX/NFKB1/NRAS/RELA/SMAD3/STAT1/STAT3	10
ssc04621	NOD-like receptor signaling pathway	15/448	175/9206	0.0234191	0.0234191	0.0594545	ATG12/CARD6/CASP8/CCL2/CHUK/GP91-PHOX/JAK1/MYD88/NAMPT/NFKB1/NLRP3/RELA/RNASEL/STAT1/TXNIP	15
ssc04730	Long-term depression	7/448	59/9206	0.02365	0.02365	0.0594545	GNA11/GNA12/MAP2K1/NRAS/PLA2G4A/PPP2CB/RAF1	7
ssc01524	Platinum drug resistance	8/448	74/9206	0.02676	0.02676	0.0664907	CASP3/CASP8/CASP9/GSTA1/LOC100153094/MGST1/SLC31A1/TOP2A	8
ssc05216	Thyroid cancer	5/448	36/9206	0.028973	0.028973	0.0711618	CTNNB1/MAP2K1/NRAS/TCF7L1/TFG	5
ssc05226	Gastric cancer	13/448	149/9206	0.029465	0.029465	0.0715479	APC/APC2/CTNNB1/EGFR/FGF21/FGF9/GRB2/MAP2K1/NRAS/RAF1/SMAD3/TCF7L1/WNT2B	13
ssc04912	GnRH signaling pathway	9/448	90/9206	0.030512	0.030512	0.072985	CDC42/EGFR/GNA11/GRB2/MAP2K1/MAP3K3/NRAS/PLA2G4A/RAF1	9
ssc04721	Synaptic vesicle cycle	8/448	76/9206	0.0308055	0.0308055	0.072985	AP2B1/AP2M1/ATP6V0A4/ATP6V1A/ATP6V1D/ATP6V1G1/CLTC/SLC1A1	8
ssc04966	Collecting duct acid secretion	4/448	25/9206	0.0310816	0.0310816	0.072985	ATP6V0A4/ATP6V1A/ATP6V1D/ATP6V1G1	4
ssc04071	Sphingolipid signaling pathway	11/448	120/9206	0.0316357	0.0316357	0.0734789	GNA12/MAP2K1/MS4A2/NFKB1/NRAS/PPP2CB/PPP2R3C/PPP2R5D/PTEN/RAF1/RELA	11
ssc03015	mRNA surveillance pathway	9/448	91/9206	0.032467	0.032467	0.0745988	CPSF7/NCBP1/NUDT21/NXT2/PPP1CB/PPP1CC/PPP2CB/PPP2R3C/PPP2R5D	9
ssc05100	Bacterial invasion of epithelial cells	8/448	77/9206	0.0329775	0.0329775	0.0749657	ARHGEF26/ARPC2/ARPC5/ARPC5L/CDC42/CLTC/CTNNB1/RHOG	8
ssc01521	EGFR tyrosine kinase inhibitor resistance	8/448	78/9206	0.0352516	0.0352516	0.079263	EGFR/GRB2/JAK1/MAP2K1/NRAS/PTEN/RAF1/STAT3	8
ssc04151	PI3K-Akt signaling pathway	25/448	351/9206	0.0356098	0.0356098	0.079263	CASP9/CHUK/COL6A5/CREB5/EGFR/FGF21/FGF9/GNG10/GNG11/GNG2/GRB2/IGF2/IL7R/JAK1/LAMA1/MAP2K1/NFKB1/NRAS/PPP2CB/PPP2R3C/PPP2R5D/PTEN/RAF1/RELA/YWHAB	25
ssc04371	Apelin signaling pathway	12/448	138/9206	0.036367	0.036367	0.080114	ACTA2/GNG10/GNG11/GNG2/MAP2K1/MEF2A/NRAS/PRKAG3/RAF1/RYR2/SMAD3/TFAM	12
ssc05207	Chemical carcinogenesis - receptor activation	16/448	202/9206	0.037336	0.037336	0.0809976	CREB5/EGFR/EPHX2/FGF9/GRB2/GSTA1/KLF5/KPNA1/LOC100153094/MAP2K1/MGST1/NFKB1/NRAS/RAF1/RELA/STAT3	16
ssc04814	Motor proteins	15/448	186/9206	0.0375262	0.0375262	0.0809976	ACTA2/ACTR1B/CAPZA1/CAPZA2/DCTN6/DNAH9/DYNLRB2/KIF13B/LOC733637/MRLC2/MYO16/TNNI3/TUBA1B/TUBAL3/TUBE1	15
ssc04350	TGF-beta signaling pathway	10/448	109/9206	0.0391623	0.0391623	0.0836837	BAMBI/BMP5/BMPR2/FBN1/HDAC1/PITX2/PPP2CB/SMAD3/SMAD9/TFRC	10
ssc04664	Fc epsilon RI signaling pathway	7/448	66/9206	0.0405203	0.0405203	0.0857282	GRB2/MAP2K1/MS4A2/NRAS/PLA2G4A/RAF1/VAV1	7
ssc04931	Insulin resistance	10/448	110/9206	0.0412945	0.0412945	0.0865097	CREB5/LOC100511343/NFKB1/PPP1CB/PPP1CC/PRKAG3/PTEN/RELA/STAT3/TBC1D4	10
ssc05231	Choline metabolism in cancer	9/448	96/9206	0.0435482	0.0435482	0.0903452	EGFR/GRB2/HIF1A/MAP2K1/NRAS/PLA2G4A/PLPP1/RAF1/WASF3	9
ssc04392	Hippo signaling pathway - multiple species	4/448	28/9206	0.0449113	0.0449113	0.0922772	AJUBA/SAV1/TEAD1/TEAD4	4
ssc05211	Renal cell carcinoma	7/448	68/9206	0.0464873	0.0464873	0.0946057	CDC42/EPAS1/GRB2/HIF1A/MAP2K1/NRAS/RAF1	7
ssc04120	Ubiquitin mediated proteolysis	12/448	144/9206	0.0478539	0.0478539	0.0964682	ANAPC10/HERC4/LOC100156381/LOC102160336/NEDD4/PRPF19/SKP2/UBB/UBE2D3/UBE2L6/UBE2N/UBE2Q2	12
ssc05218	Melanoma	7/448	69/9206	0.0496706	0.0496706	0.0988996	EGFR/FGF21/FGF9/MAP2K1/NRAS/PTEN/RAF1	7
ssc05162	Measles	12/448	145/9206	0.0499857	0.0499857	0.0988996	CASP3/CASP8/CASP9/CD209/CD3D/CHUK/JAK1/MYD88/NFKB1/RELA/STAT1/STAT3	12
