# Supplementary material for: The Metabolic Pathway of Bile Secretion Is Vulnerable to Salmonella enterica Exposure in Porcine Intestinal Epithelial Cells
Source: Animals (Basel). 2024 Mar 3;14(5):789. doi: 10.3390/ani14050789 (PMC10931422; doi:10.3390/ani14050789)
Supplement: Supplementary file 1 [file animals-14-00789-s001.zip › Table S8. The differentially expressed genes in IPEC-J2 between the Salmonella-treated and LPS in commom.xlsx]

## Sheet: up_LPS_Nor
baseMean	log2FoldChange	lfcSE	stat	pvalue	padj	change	gene
864.479	5.56703	0.720621	7.72532	1.11576e-14	3.83622e-12	UP	ADA
11828.9	2.9086	0.333721	8.71568	2.89022e-18	2.1294e-15	UP	DMBT1
1991.56	1.35631	0.175765	7.71657	1.19503e-14	4.01947e-12	UP	VDR
292.316	4.94829	0.538857	9.18294	4.19484e-20	5.40855e-17	UP	PDX1
363.417	2.32645	0.243455	9.55596	1.22443e-21	1.89443e-18	UP	CYBRD1
189.865	1.74271	0.249477	6.98546	2.8392e-12	4.48246e-10	UP	SLC35G1
889.923	2.58996	0.290024	8.93015	4.25443e-19	4.11403e-16	UP	ATP2B1
726.741	2.81039	0.332206	8.45977	2.67907e-17	1.48038e-14	UP	TM4SF5
435.415	2.21959	0.427828	5.18804	2.12517e-07	6.62915e-06	UP	CYP3A29
527.209	1.90505	0.215259	8.85005	8.74833e-19	7.96201e-16	UP	DTX3L
1003.62	2.08083	0.207274	10.039	1.02672e-23	2.26934e-20	UP	STOM
118.426	2.08545	0.278435	7.48988	6.89378e-14	2.00666e-11	UP	ABHD4
295.348	1.35635	0.20932	6.47982	9.18322e-11	8.88951e-09	UP	CASP10
710.209	5.072	0.438015	11.5795	5.23418e-31	4.04916e-27	UP	SLC46A1
137.085	2.13291	0.335664	6.35431	2.09365e-10	1.7701e-08	UP	B4GALT1
156.205	1.73905	0.485402	3.5827	0.000340064	0.00334699	UP	SLC2A6
697.435	1.73395	0.233956	7.41143	1.24946e-13	3.16911e-11	UP	NME7
220.659	2.20052	0.282023	7.80261	6.06374e-15	2.23377e-12	UP	TMEM127
393.664	1.90831	0.3348	5.69985	1.1991e-08	5.52157e-07	UP	VSIR
135.684	1.85349	0.366619	5.05564	4.28951e-07	1.23131e-05	UP	TBC1D10C
63.6795	2.4212	0.499154	4.8506	1.23086e-06	3.04703e-05	UP	TSPAN1
413.121	1.29577	0.21279	6.08942	1.13319e-09	7.36666e-08	UP	CDIP1
310.106	1.84731	0.251022	7.35916	1.85074e-13	4.47416e-11	UP	RNF186
654.204	1.72447	0.291587	5.9141	3.33689e-09	1.75252e-07	UP	ST6GALNAC4
771.597	2.19903	0.31062	7.07948	1.44694e-12	2.61462e-10	UP	ONECUT2
84.1761	2.17959	0.337563	6.45684	1.06909e-10	1.01478e-08	UP	TMEM104
907.926	2.4258	0.362245	6.69657	2.1337e-11	2.55911e-09	UP	CLDN2
1064.11	1.53332	0.215585	7.11237	1.14064e-12	2.15219e-10	UP	BAK1
106.334	2.18664	0.35136	6.22338	4.86572e-10	3.63683e-08	UP	STIM1
244.509	1.28873	0.216288	5.95838	2.54752e-09	1.43374e-07	UP	SPPL2B
313.511	1.71262	0.284043	6.02946	1.64509e-09	9.86544e-08	UP	SLC5A6
821.585	2.05944	0.36627	5.62274	1.87956e-08	7.96726e-07	UP	TMEM238
198.411	1.22142	0.434897	2.80853	0.00497676	0.0285928	UP	PFKFB3
347.948	1.34886	0.196083	6.87905	6.02537e-12	8.6319e-10	UP	FAM109A
101.131	2.58544	0.467182	5.53411	3.12818e-08	1.24101e-06	UP	LOC100525112
296.045	2.40043	0.237927	10.0889	6.1836e-24	1.59454e-20	UP	IDUA
277.522	3.04145	0.45537	6.67908	2.40455e-11	2.79723e-09	UP	BCO1
3754.25	2.24928	0.243031	9.25509	2.14043e-20	3.01062e-17	UP	CTSZ
28.1419	3.11737	0.984301	3.16709	0.00153973	0.0112631	UP	FRMD1
63.2573	1.80428	0.457604	3.94289	8.05066e-05	0.00101022	UP	SLC36A1
253.575	2.47321	0.298818	8.27662	1.26716e-16	6.32433e-14	UP	SCARB1
1229.91	2.0292	0.359279	5.64799	1.62334e-08	7.05442e-07	UP	CLDN4
199.633	1.87495	0.308075	6.08602	1.15752e-09	7.46202e-08	UP	ATP1B3
674.694	1.35849	0.483958	2.80704	0.00499993	0.0287046	UP	SLC40A1
534.325	1.37865	0.352996	3.90557	9.40018e-05	0.00114519	UP	EFNA1
509.117	3.1598	0.453461	6.96818	3.21064e-12	5.01768e-10	UP	ANKH
601.991	1.76986	0.228418	7.74834	9.3101e-15	3.27377e-12	UP	SLC19A1
503.122	1.93706	0.281088	6.89131	5.52813e-12	8.22415e-10	UP	TSKU
505.068	2.12117	0.365175	5.80864	6.29824e-09	3.12328e-07	UP	LOC106507664
234.758	1.99156	0.352929	5.64296	1.67153e-08	7.22398e-07	UP	TMEM37
1149.07	1.32675	0.193727	6.84856	7.45966e-12	1.03978e-09	UP	MSRB1
105.326	5.24925	1.11505	4.70763	2.50609e-06	5.54837e-05	UP	PDZK1IP1
26.9104	7.46944	1.20219	6.21317	5.19252e-10	3.82565e-08	UP	CYP2B22
536.117	1.30333	0.294627	4.42366	9.7041e-06	0.000173574	UP	LOC100519643
1240.74	1.67506	0.228465	7.33181	2.2707e-13	5.16651e-11	UP	PRSS8
195.812	3.35479	0.306733	10.9371	7.65723e-28	3.94909e-24	UP	IL17RA
1847.53	1.58692	0.254322	6.23981	4.38109e-10	3.31534e-08	UP	PTTG1IP
358.804	1.88227	0.399205	4.71505	2.41656e-06	5.37972e-05	UP	TMEM65
841.097	1.44012	0.182962	7.87112	3.51473e-15	1.32634e-12	UP	KDELR2
153.716	2.12789	0.357169	5.95766	2.55869e-09	1.43374e-07	UP	SLC39A11
493.735	1.30327	0.248883	5.23648	1.63664e-07	5.29751e-06	UP	KCNQ1
16.3127	3.37238	0.758131	4.44828	8.65609e-06	0.000157191	UP	ABTB2
324.272	1.27974	0.229197	5.58359	2.35606e-08	9.69492e-07	UP	CANT1
148.619	1.48485	0.360122	4.1232	3.73652e-05	0.000541305	UP	SCAMP2
386.309	2.01574	0.372831	5.40659	6.42361e-08	2.36634e-06	UP	COL17A1
583.99	1.21747	0.340336	3.57726	0.000347214	0.00339791	UP	ELOVL1
1398.23	1.93291	0.325981	5.92954	3.03793e-09	1.62079e-07	UP	TFF3
3494.74	1.48414	0.241275	6.15125	7.68753e-10	5.30989e-08	UP	SMIM24
238.977	1.67647	0.372155	4.50476	6.64484e-06	0.000125837	UP	KIAA1161
262.388	1.27347	0.22626	5.62835	1.81944e-08	7.7979e-07	UP	GRAP
144.937	1.44466	0.404351	3.5728	0.000353191	0.00344333	UP	ABHD2
408.265	1.61573	0.320191	5.04615	4.50801e-07	1.28083e-05	UP	DGCR2
6003.05	2.04321	0.277599	7.36029	1.8351e-13	4.47416e-11	UP	LYPD8
120.833	1.55274	0.260577	5.95884	2.54038e-09	1.43374e-07	UP	PCDH1
282.043	2.4308	0.368105	6.60353	4.01469e-11	4.25447e-09	UP	PRDM16
1414.95	1.41796	0.253463	5.59433	2.21476e-08	9.20519e-07	UP	C2H11orf86
59.7034	2.57244	0.476314	5.40073	6.63715e-08	2.43341e-06	UP	RASAL3
686.662	1.29835	0.212015	6.12389	9.13165e-10	6.11623e-08	UP	SREBF2
240.271	1.26841	0.33992	3.7315	0.000190344	0.00207688	UP	CASTOR2
161.094	1.67284	0.239419	6.98709	2.80639e-12	4.47633e-10	UP	SMPD3
46.8296	2.07298	0.696696	2.97544	0.00292568	0.0190155	UP	AQP8
62.2353	1.41119	0.428176	3.29581	0.000981388	0.00777871	UP	PHOSPHO1
149.826	1.96286	0.346527	5.66438	1.47553e-08	6.6294e-07	UP	MFSD2A
392.203	1.70716	0.246263	6.93226	4.14156e-12	6.28218e-10	UP	ZDHHC12
1163.85	1.79351	0.280586	6.39204	1.63692e-10	1.46396e-08	UP	LRP10
1578.69	1.54331	0.226365	6.81777	9.24648e-12	1.25493e-09	UP	STAP2
205.071	1.41946	0.314941	4.50705	6.57353e-06	0.000124639	UP	GCLC
8.65323	3.38694	1.26635	2.67456	0.00748275	0.0392621	UP	PLCH2
23.3403	2.52603	0.536793	4.70577	2.52908e-06	5.58998e-05	UP	LRFN3
805.13	1.61165	0.264899	6.084	1.1722e-09	7.49432e-08	UP	SLC39A5
40.5957	4.21461	0.738909	5.70384	1.17139e-08	5.42628e-07	UP	RDH5
569.641	1.65892	0.347903	4.76836	1.85736e-06	4.32788e-05	UP	SREBF1
6292.27	2.08748	0.334436	6.24178	4.32608e-10	3.2972e-08	UP	LOC100522404
231.962	1.8144	0.340135	5.33437	9.58764e-08	3.32601e-06	UP	SIDT2
617.832	1.53103	0.232339	6.58967	4.40819e-11	4.6397e-09	UP	NUCB1
410.633	1.55136	0.27596	5.62166	1.8913e-08	7.99516e-07	UP	FURIN
387.088	1.51199	0.248334	6.08853	1.13952e-09	7.37684e-08	UP	METRNL
292.998	1.815	0.343084	5.29026	1.22142e-07	4.14425e-06	UP	TMEM184A
1494.63	2.34043	0.427044	5.48055	4.24015e-08	1.62385e-06	UP	SLC30A10
235.257	1.21536	0.241678	5.02885	4.93427e-07	1.37308e-05	UP	STARD3
181.963	1.20694	0.267046	4.5196	6.19573e-06	0.000118492	UP	LAPTM4B
51.7796	1.27752	0.374535	3.41095	0.00064737	0.00559872	UP	SLC35D1
743.468	1.43815	0.276635	5.19875	2.00634e-07	6.34078e-06	UP	CLRN3
69.7644	8.84527	1.95052	4.53483	5.76494e-06	0.000111773	UP	OTOP3
143.843	1.32506	0.29983	4.41935	9.89972e-06	0.000176468	UP	SUSD6
803.321	1.66463	0.278823	5.9702	2.36958e-09	1.36799e-07	UP	GRINA
194.386	1.65121	0.309	5.34372	9.10578e-08	3.19466e-06	UP	LOC100525140
28.2792	2.27494	0.521155	4.36518	1.27016e-05	0.000218354	UP	SLC29A3
423.607	1.56904	0.403309	3.89041	0.000100073	0.00120258	UP	CYP2D25
105.468	1.42039	0.353308	4.02027	5.81324e-05	0.000773366	UP	EEFSEC
315.208	1.61309	0.283191	5.69611	1.22574e-08	5.59429e-07	UP	GLG1
2124.32	1.47045	0.200099	7.34864	2.0024e-13	4.76633e-11	UP	TAPBP
172.751	1.9264	0.295955	6.50908	7.56136e-11	7.54704e-09	UP	PLXNA2
373.906	1.33721	0.254153	5.26145	1.42926e-07	4.71502e-06	UP	OCEL1
6442.55	2.1179	0.308363	6.86822	6.50087e-12	9.22766e-10	UP	PRAP1
483.604	1.51076	0.19497	7.74869	9.28454e-15	3.27377e-12	UP	PRADC1
98.4585	2.41116	0.550299	4.38153	1.17847e-05	0.000205561	UP	LOC100621559
471.896	1.56779	0.248238	6.31567	2.6899e-10	2.17896e-08	UP	LMF1
514.846	2.01719	0.392321	5.14169	2.72275e-07	8.26007e-06	UP	FAM234A
180.407	2.92955	0.342707	8.54827	1.24949e-17	7.43543e-15	UP	CYP2C42
794.043	1.84298	0.286053	6.44279	1.173e-10	1.09992e-08	UP	TMEM176B
213.677	1.74951	0.308946	5.66282	1.48903e-08	6.63929e-07	UP	SEMA6A
426.157	1.39957	0.260533	5.37193	7.7898e-08	2.80941e-06	UP	TEX261
281.233	1.59029	0.378301	4.20376	2.62515e-05	0.00040374	UP	PPP1R1A
20.4508	3.34731	0.766718	4.36576	1.2668e-05	0.000218137	UP	LOC102158609
163.265	1.35438	0.329151	4.11475	3.87595e-05	0.000555265	UP	MPV17L2
167.811	1.25897	0.310505	4.05459	5.02218e-05	0.000691926	UP	KIF21B
90.7165	1.48912	0.375165	3.96923	7.21046e-05	0.000923512	UP	CTNS
377.328	1.65309	0.317851	5.20085	1.98378e-07	6.28955e-06	UP	RHOD
124.086	1.27913	0.379831	3.36763	0.000758184	0.00634431	UP	JAML
14.9822	2.2019	1.00191	2.19771	0.02797	0.106432	UP	THEM6
207.562	1.35185	0.286313	4.72158	2.34025e-06	5.27818e-05	UP	RALGPS1
46.6276	3.9964	1.99002	2.00822	0.0446198	0.149073	UP	LOC100737755
363.958	1.90763	0.308964	6.17428	6.64654e-10	4.67433e-08	UP	GSTK1
242.141	1.56625	0.222233	7.04779	1.81784e-12	3.23282e-10	UP	TMEM63B
511.017	1.95429	0.384908	5.07729	3.82865e-07	1.11347e-05	UP	CEACAM1
515.958	3.15459	0.67241	4.69147	2.71243e-06	5.88718e-05	UP	CYP1A1
12561.9	1.61575	0.42908	3.76562	0.000166137	0.00184793	UP	S100G
186.743	1.64276	0.263288	6.23939	4.39274e-10	3.31534e-08	UP	TTYH3
255.634	1.69228	0.293773	5.76052	8.38535e-09	4.04169e-07	UP	MGAT3
55.5915	2.60794	0.511429	5.09933	3.40856e-07	1.01029e-05	UP	SLC2A1
50.1058	1.74905	0.424057	4.12457	3.71431e-05	0.000539097	UP	MLC1
107.097	1.77242	0.37348	4.74567	2.07816e-06	4.7564e-05	UP	BST1
198.773	1.44354	0.235546	6.1285	8.87097e-10	5.99507e-08	UP	SLC35F6
55.3892	2.96523	0.719681	4.1202	3.78544e-05	0.000545329	UP	TLL2
349.54	1.60424	0.342914	4.67826	2.89324e-06	6.20003e-05	UP	LOC110261008
140.874	1.51972	0.290524	5.23096	1.6863e-07	5.44684e-06	UP	TMEM115
40.1626	1.21191	0.409015	2.96299	0.00304668	0.0195727	UP	KLHL3
61.7758	2.13649	0.580255	3.68198	0.000231426	0.0024358	UP	LOC106505208
196.799	1.99352	0.284975	6.99541	2.6448e-12	4.35322e-10	UP	UGCG
627.836	2.47886	0.443896	5.58433	2.34606e-08	9.6896e-07	UP	SLC9A3
53.0217	2.03201	0.572895	3.54691	0.000389772	0.00373409	UP	TCN1
137.976	1.28764	0.312162	4.12493	3.70848e-05	0.000538757	UP	SCAMP4
1645.77	1.67025	0.288338	5.79269	6.92672e-09	3.40223e-07	UP	SPINT1
145.598	2.14646	0.335999	6.38829	1.67749e-10	1.47593e-08	UP	SLC52A2
180.562	1.55145	0.424129	3.65797	0.000254216	0.00264153	UP	ABCC2
49.3748	1.66867	0.568743	2.93396	0.00334663	0.0211188	UP	CHPF
153.015	1.70946	0.38387	4.45323	8.4589e-06	0.000154335	UP	GLYCTK
115.731	1.42592	0.286062	4.98466	6.20725e-07	1.6587e-05	UP	APMAP
117.363	1.65553	0.268949	6.15557	7.48091e-10	5.19035e-08	UP	LRAT
44.9665	1.72357	0.376262	4.58076	4.63279e-06	9.29682e-05	UP	MIEF2
144.19	2.26174	0.383608	5.89597	3.72494e-09	1.92107e-07	UP	BACE2
96.441	1.45684	0.394442	3.69342	0.000221259	0.00234911	UP	DUSP8
173.056	1.37838	0.27658	4.98365	6.23961e-07	1.66447e-05	UP	LRRC8A
224.39	1.6732	0.339092	4.93436	8.04154e-07	2.08756e-05	UP	KCNK5
1136.54	1.8534	0.367302	5.04599	4.5117e-07	1.28083e-05	UP	FCGBP
579.078	1.22845	0.220825	5.56301	2.65164e-08	1.0768e-06	UP	ERBB3
602.429	1.26779	0.258816	4.89842	9.66094e-07	2.45845e-05	UP	ABCD1
568.827	1.5962	0.355644	4.48821	7.18244e-06	0.000134699	UP	RNASET2
41.4224	1.95814	0.484399	4.04241	5.29045e-05	0.000717387	UP	CD320
90.6252	1.77185	0.378933	4.67589	2.92677e-06	6.24593e-05	UP	GPR146
456.344	1.38441	0.228425	6.06068	1.35551e-09	8.45665e-08	UP	CD151
17.1756	2.16383	0.871442	2.48305	0.0130265	0.0598789	UP	SLC5A10
221.259	1.70069	0.398849	4.26401	2.00794e-05	0.000322605	UP	GPD1
17.387	3.69202	0.807059	4.57466	4.76999e-06	9.51048e-05	UP	TIMP4
91.537	1.77951	0.356083	4.99747	5.80885e-07	1.57675e-05	UP	ACVR1B
18.5326	1.90635	0.657072	2.90128	0.00371647	0.0228172	UP	HBEGF
219.553	1.2307	0.342027	3.59827	0.00032034	0.00318324	UP	MOGAT2
239.807	1.53635	0.211459	7.26549	3.71697e-13	7.98736e-11	UP	MFSD11
122.405	1.80488	0.345157	5.22916	1.7028e-07	5.48869e-06	UP	TMEM253
174.115	1.39344	0.383281	3.63556	0.000277375	0.00284103	UP	CAMK2N1
61.7553	2.13922	0.404529	5.28817	1.23549e-07	4.17369e-06	UP	PGAP3
1213.44	1.6298	0.288306	5.65303	1.57643e-08	6.94888e-07	UP	POR
19.6863	1.93317	0.588922	3.28255	0.00102872	0.00809171	UP	P3H2
90.2416	1.25226	0.314936	3.97625	7.00117e-05	0.000901932	UP	CBX7
125.915	1.3239	0.300364	4.40766	1.04494e-05	0.000184981	UP	PCNX1
3442.99	1.66798	0.325487	5.12458	2.98209e-07	8.959e-06	UP	CREB3L3
3859.41	1.32288	0.282515	4.68253	2.83351e-06	6.10587e-05	UP	REEP6
49.9964	1.31969	0.409816	3.22021	0.00128095	0.00963952	UP	SLC23A2
89.7425	1.64578	0.35196	4.67603	2.92484e-06	6.24593e-05	UP	RNF128
84.9986	1.34826	0.366176	3.682	0.000231414	0.0024358	UP	HAGHL
1431.91	1.53649	0.335786	4.57579	4.74421e-06	9.49398e-05	UP	SLC6A8
97.0027	1.60012	0.5613	2.85075	0.00436166	0.0257081	UP	CYP3A46
115.678	2.16695	0.451988	4.79427	1.6327e-06	3.89732e-05	UP	NOXO1
182.7	1.63219	0.323912	5.039	4.67983e-07	1.31733e-05	UP	ADCY9
661.766	1.67456	0.312862	5.35241	8.67902e-08	3.07281e-06	UP	MFSD12
49.2067	1.45195	0.394679	3.67881	0.000234328	0.00246132	UP	MFSD6L
144.654	1.34323	0.495336	2.71175	0.00669284	0.0361437	UP	ACAP1
164.799	1.58698	0.249903	6.35037	2.14802e-10	1.79644e-08	UP	KIAA0319L
37.7434	1.22252	0.375306	3.25741	0.00112434	0.00868051	UP	MAGIX
32.7977	3.35194	0.764162	4.38643	1.15225e-05	0.000201248	UP	IFFO2
56.5544	1.7155	0.478089	3.58825	0.000332904	0.00328908	UP	C9H11orf52
174.56	1.41368	0.393611	3.59158	0.000328684	0.0032557	UP	ICOSLG
228.101	1.49253	0.382038	3.90675	9.3546e-05	0.00114144	UP	LPGAT1
60.1533	1.27928	0.370137	3.45624	0.000547762	0.00490167	UP	LOC110257453
65.8122	1.27886	0.584625	2.18749	0.0287065	0.108329	UP	LOC102158002
31.283	4.57571	1.52216	3.00607	0.00264645	0.0175508	UP	SLC16A9
122.507	1.45304	0.374762	3.87724	0.000105647	0.0012593	UP	SLC11A2
57.2882	1.87183	0.416135	4.49813	6.85544e-06	0.000129193	UP	PIK3CD
17.4344	1.20393	0.606871	1.98383	0.0472751	0.155559	UP	LOC102158192
80.7611	1.3857	0.335018	4.13619	3.53116e-05	0.000520325	UP	ABHD12
20.2255	2.12542	0.607065	3.50115	0.000463258	0.00428423	UP	PDGFRL
10.1402	2.60638	0.930591	2.80078	0.00509791	0.0292129	UP	TMEM27
16.6704	3.69028	0.911254	4.04967	5.12891e-05	0.000702043	UP	F10
147.751	1.38206	0.328066	4.21275	2.52277e-05	0.00039189	UP	PGRMC2
120.402	1.95836	0.354863	5.51862	3.41671e-08	1.33831e-06	UP	LOC100152566
110.758	1.82078	0.490069	3.71535	0.000202925	0.00218487	UP	LOC110259106
42.753	4.31442	0.684387	6.30407	2.89926e-10	2.31223e-08	UP	FOLH1B
127.419	1.93089	0.349076	5.53144	3.17605e-08	1.25677e-06	UP	OGFOD3
185.009	1.5779	0.513918	3.07033	0.0021382	0.0147097	UP	RETSAT
183.36	1.63799	0.25999	6.30021	2.97238e-10	2.35034e-08	UP	SYVN1
30.3064	1.39465	0.557444	2.50186	0.0123543	0.0575219	UP	ZC3H12D
77.2757	1.25959	0.397952	3.16518	0.00154989	0.0113113	UP	CCDC88B
81.4868	1.23248	0.287744	4.28325	1.84183e-05	0.000298708	UP	GPR35
92.13	1.51816	0.444952	3.41198	0.000644935	0.00558078	UP	JAK3
75.4679	2.42036	0.535442	4.52031	6.17497e-06	0.000118241	UP	CCL20
21.2773	1.36376	0.572376	2.38263	0.0171895	0.0737127	UP	RGN
66.0859	1.67066	0.584883	2.8564	0.00428473	0.0254016	UP	SLC5A4
11115.6	4.72466	0.865579	5.45839	4.80484e-08	1.81762e-06	UP	LOC102165485
109.616	1.23836	0.47548	2.60445	0.00920226	0.0459134	UP	LAT
49.1155	1.45102	0.447038	3.24585	0.00117099	0.008978	UP	SKAP1
181.086	1.39401	0.390812	3.56696	0.000361151	0.00350767	UP	PTPRCAP
53.9716	2.29351	0.683182	3.3571	0.000787646	0.0065378	UP	TRPV6
92.691	1.82854	0.455981	4.01011	6.06904e-05	0.000800513	UP	SLC19A3
203.91	1.59294	0.228806	6.96198	3.35528e-12	5.13989e-10	UP	PLBD2
37.6596	1.61272	0.406474	3.96759	7.26045e-05	0.000929146	UP	FRRS1
19.7106	2.07846	0.823935	2.52261	0.0116488	0.0551008	UP	AQP7
18.8942	2.46648	0.683046	3.61099	0.000305028	0.00307052	UP	LOC106509607
173.671	1.33518	0.346986	3.84793	0.000119122	0.00139203	UP	LOC100624648
137.928	1.78007	0.315181	5.64775	1.62561e-08	7.05442e-07	UP	PITX1
20.146	2.29998	0.71152	3.23249	0.00122719	0.00933481	UP	LAG3
299	1.89419	0.412312	4.59407	4.34686e-06	8.75711e-05	UP	BPI
127.434	1.22305	0.403135	3.03384	0.00241465	0.0162362	UP	ZBTB42
190.146	1.33102	0.408478	3.2585	0.00112005	0.00866148	UP	FRK
292.455	1.30838	0.395677	3.30669	0.000944061	0.00754709	UP	ZFYVE27
319.24	2.16041	0.303381	7.12111	1.0706e-12	2.07053e-10	UP	SIGMAR1
346.165	1.44115	0.314967	4.57556	4.74944e-06	9.49398e-05	UP	PLLP
80.609	1.8606	0.519359	3.58249	0.000340339	0.00334756	UP	ABCC3
74.8139	1.50661	0.290588	5.18469	2.1637e-07	6.72225e-06	UP	LOC102159820
431.749	1.70255	0.365777	4.65462	3.24579e-06	6.82321e-05	UP	HYAL2
27.0115	2.11414	0.642102	3.29253	0.000992905	0.00786194	UP	GALNT6
86.6085	1.53678	0.441253	3.48275	0.000496283	0.00451676	UP	TMEM185A
29.5087	1.38899	0.586646	2.36768	0.0178999	0.0759792	UP	SYNE4
44.292	4.51123	1.2859	3.50821	0.00045113	0.00419895	UP	GPER1
290.213	1.58458	0.427522	3.70643	0.0002102	0.00225222	UP	B3GNT8
25.3244	1.93073	0.52443	3.68158	0.000231789	0.00243796	UP	RGS14
54.9481	1.62794	0.459907	3.53971	0.000400572	0.00381864	UP	EEPD1
93.9316	1.2698	0.411562	3.08532	0.00203331	0.0140947	UP	GPAT3
69.5385	1.47441	0.362631	4.06587	4.78543e-05	0.000661073	UP	LMTK2
22.1318	1.85706	0.821012	2.26192	0.0237025	0.0938269	UP	PVRIG
943.713	1.50344	0.27302	5.50669	3.65643e-08	1.41078e-06	UP	CDH1
368.721	1.50759	0.432306	3.48731	0.000487899	0.00445881	UP	GGT1
32.9549	2.1323	0.545208	3.911	9.19161e-05	0.0011251	UP	LOC100625498
28.6783	2.56528	0.848842	3.02209	0.00251033	0.016763	UP	LOC106507519
2821.64	1.22459	0.339991	3.60184	0.000315976	0.00315467	UP	AOC1
52.4842	1.65282	0.566079	2.91976	0.00350297	0.0218364	UP	MFSD6
198.013	1.42416	0.262598	5.42332	5.8501e-08	2.17057e-06	UP	MBOAT7
32.1035	3.47799	0.904555	3.84497	0.000120568	0.00140787	UP	LOC102166539
210.294	2.46675	0.271274	9.0932	9.61685e-20	1.0628e-16	UP	SLC16A1
35.1419	1.45845	0.49071	2.97212	0.0029575	0.0191458	UP	LOC106510565
293.948	2.25097	0.317359	7.09281	1.3142e-12	2.42063e-10	UP	TMEM140
28.5861	1.45367	0.590888	2.46014	0.0138883	0.0629041	UP	PPP1R16B
195.673	1.49754	0.414899	3.60941	0.000306896	0.00308531	UP	LOC100153359
11.0531	1.51962	0.758178	2.00431	0.045037	0.150272	UP	LOC106505221
20.1184	2.26681	0.809661	2.79971	0.00511491	0.0292786	UP	LOC110256841
18.1259	1.30973	0.61736	2.1215	0.0338795	0.122216	UP	PIGV
64.5029	1.51353	0.310849	4.869	1.12162e-06	2.8126e-05	UP	MFSD5
36.809	1.40448	0.400816	3.50407	0.00045821	0.00424517	UP	RHBDD1
179.107	4.3811	1.44622	3.02934	0.00245093	0.0164444	UP	SLC2A8
958.16	4.35613	0.806146	5.40365	6.52999e-08	2.39981e-06	UP	LOC102158332
42.896	1.88216	0.675515	2.78626	0.00533207	0.03023	UP	CD6
140.304	1.54192	0.318529	4.84076	1.29344e-06	3.17652e-05	UP	ATP6V0A1
80.2402	1.37824	0.287836	4.78829	1.68205e-06	3.99151e-05	UP	PLXNA1
37.6206	1.23355	0.41693	2.95866	0.00308983	0.0197872	UP	MTX3
228.03	1.24215	0.34612	3.58878	0.000332227	0.00328449	UP	SEMA5A
22.2228	1.44803	0.52893	2.73766	0.00618779	0.0339615	UP	GPR55
110.285	1.5413	0.493689	3.12201	0.00179624	0.0127582	UP	P2RY2
137.145	5.68263	1.15743	4.90971	9.12096e-07	2.34418e-05	UP	MLN
18.4981	2.16075	0.75272	2.87058	0.00409716	0.0245227	UP	ABHD1
57.7728	1.26477	0.434674	2.9097	0.00361773	0.0224343	UP	C10H1orf53
39.4353	3.97472	0.728389	5.45686	4.8462e-08	1.82879e-06	UP	SCT
415.692	5.1013	1.16298	4.3864	1.15244e-05	0.000201248	UP	LOC110256717
61.4875	3.37717	0.715123	4.7225	2.32967e-06	5.26198e-05	UP	SGK2
39.513	1.99949	0.473632	4.22161	2.42566e-05	0.000381013	UP	MAN1A2
12.2677	1.60107	0.745586	2.1474	0.0317617	0.116837	UP	PTPRR
76.3336	2.19681	0.593113	3.70386	0.000212343	0.00226734	UP	LOC110261491
300.993	4.01453	0.746081	5.38083	7.41446e-08	2.69288e-06	UP	MZB1
25.1968	2.11984	0.88669	2.39073	0.0168148	0.0725482	UP	GDPD2
25.5438	1.97552	0.560754	3.52297	0.000426739	0.00400152	UP	TPST2
15.266	2.19316	0.76259	2.87594	0.00402823	0.0242132	UP	LOC106509717
407.332	3.30132	0.374526	8.81465	1.20062e-18	1.032e-15	UP	GIP
30.6595	2.0439	0.579321	3.52809	0.000418569	0.00395366	UP	LOC102158125
46.1517	1.24177	0.435349	2.85236	0.00433958	0.0256071	UP	CD99L2
77.3871	1.51206	0.477175	3.16877	0.00153086	0.0112094	UP	KCNJ13
77.7768	1.86415	0.498937	3.73624	0.000186795	0.00204536	UP	ATRN
16.3855	2.06114	0.652666	3.15803	0.00158837	0.0115323	UP	TMEM154
28.4878	2.22778	0.50779	4.38722	1.14811e-05	0.000200945	UP	ADH4
18.1386	1.84809	0.639079	2.8918	0.0038304	0.0233599	UP	RGS11
214.85	1.92457	0.476041	4.04287	5.28014e-05	0.000716617	UP	SFTPD
70.8958	1.21027	0.426018	2.84089	0.00449885	0.0263261	UP	SCAMP1
7461.47	2.16971	0.455981	4.75832	1.95209e-06	4.50115e-05	UP	APOC3
14.163	2.08023	0.836771	2.48602	0.012918	0.0595481	UP	PADI2
48.529	1.77804	0.527521	3.37056	0.000750148	0.00629067	UP	EDN3
32.5985	1.20758	0.494182	2.44359	0.0145418	0.0651205	UP	LOC100152206
28.382	1.69179	0.632555	2.67453	0.00748344	0.0392621	UP	TMC7
28.6291	2.77792	0.791896	3.50794	0.000451594	0.00419895	UP	GLTPD2
51.1712	1.66682	0.653782	2.54951	0.0107876	0.0518822	UP	LOC100739325
42.2775	2.10999	0.5665	3.7246	0.000195623	0.00212698	UP	LOC110258799
45.9289	1.25231	0.553271	2.26346	0.0236076	0.0935596	UP	B3GALT4
2655.75	3.35064	0.754991	4.43798	9.08055e-06	0.000163577	UP	LOC100736878
23.9099	1.77814	0.863221	2.05989	0.0394087	0.136529	UP	P2RX5
81.6205	2.0638	0.634299	3.25367	0.00113924	0.0087693	UP	LOC102158889
30.8454	1.20425	0.422571	2.84981	0.00437453	0.0257643	UP	EMID1
53.9684	1.24765	0.590453	2.11304	0.0345974	0.12428	UP	PCP4L1
31.8192	1.32868	0.530279	2.50562	0.0122238	0.057069	UP	DUSP23
55.2802	1.3317	0.345014	3.85983	0.000113467	0.00133503	UP	LOC110258092
16.1955	1.82804	0.890336	2.05321	0.0400525	0.138246	UP	LOC100513844
35.753	1.59458	0.795824	2.00369	0.0451036	0.150322	UP	VMO1
85.789	1.47067	0.538398	2.73156	0.00630344	0.0344861	UP	RNF26
41.5767	2.21194	0.744406	2.97142	0.00296426	0.0191815	UP	TH
24.7861	1.92629	0.618476	3.11458	0.00184209	0.0130222	UP	SH3TC2
37.914	2.93296	1.32488	2.21375	0.0268462	0.103094	UP	SEL1L3
57.2418	1.2353	0.430034	2.87256	0.0040716	0.0243981	UP	OSTM1
72.4079	1.92685	0.57732	3.33758	0.000845107	0.00692192	UP	SLC35A2
47.3999	1.21855	0.541045	2.25221	0.0243091	0.0957023	UP	HS2ST1
14.3947	1.46959	0.74642	1.96885	0.0489698	0.159575	UP	HHAT
27.0473	1.73969	0.671164	2.59205	0.00954071	0.0472062	UP	SVOP
18.8741	1.94354	0.702656	2.76599	0.00567497	0.0317437	UP	P2RY8
32.9042	1.674	0.50374	3.32314	0.000890091	0.00722154	UP	ROM1
21.3661	1.77708	0.540097	3.29031	0.00100078	0.00791218	UP	LOC102164731
32.8272	2.82266	0.939695	3.00381	0.00266624	0.0176582	UP	LOC100152327
33.3857	1.91638	0.627564	3.05368	0.00226054	0.0153872	UP	CPLX2
66.5616	1.40194	0.524998	2.67038	0.00757651	0.0396965	UP	TMX2
38.5622	1.47006	0.682586	2.15366	0.0312666	0.115483	UP	SLC37A2
31.0181	1.30704	0.577209	2.26441	0.0235486	0.0933498	UP	AGO3
1308.44	3.84082	0.629902	6.09749	1.07745e-09	7.03388e-08	UP	LOC100739218
41.1543	1.99816	0.518622	3.85282	0.000116764	0.00136861	UP	LOC110261640
16.9231	1.53161	0.613246	2.49755	0.0125054	0.0581034	UP	CD84
17.7262	1.26671	0.568193	2.22936	0.0257899	0.100181	UP	PDZD4
33.1099	1.25884	0.621385	2.02586	0.0427794	0.144705	UP	SLC52A3
16433.9	3.82552	0.366018	10.4517	1.43866e-25	4.4518e-22	UP	SPINK1
36.5473	1.96747	0.415365	4.73671	2.17215e-06	4.94955e-05	UP	CPE
59.4609	1.28972	0.635453	2.02962	0.0423956	0.143753	UP	VSIG10
39.7211	1.49081	0.536694	2.77777	0.00547333	0.0308838	UP	IL4I1
34.6047	1.87361	0.713482	2.62601	0.0086392	0.0438177	UP	PPARG
293.692	2.93242	0.800367	3.66385	0.000248454	0.00259035	UP	LOC110258440
29.4097	1.71116	0.492878	3.47177	0.000517032	0.00466444	UP	PAOX
48.4906	2.26477	0.702529	3.22374	0.00126529	0.00956304	UP	CCK
17.4427	1.85999	0.819163	2.2706	0.0231713	0.0921181	UP	KCNG1
18.7292	1.84792	0.804511	2.29695	0.0216217	0.0874135	UP	FOXQ1
28.5158	1.35303	0.62333	2.17064	0.029958	0.111582	UP	TMC8
22.3732	1.47013	0.573247	2.56457	0.0103304	0.050151	UP	TBKBP1
26.3674	1.36514	0.617618	2.21033	0.0270825	0.103721	UP	LOC100739518
74.4632	2.55412	0.446174	5.7245	1.03741e-08	4.87865e-07	UP	GJB1
30.0547	1.60617	0.586951	2.73646	0.00621033	0.0340717	UP	LOC102158193
26.3868	1.36805	0.471294	2.90275	0.00369901	0.0227649	UP	PXYLP1
24352.1	1.60901	0.59929	2.68485	0.0072562	0.038356	UP	APOA1
34.7959	1.57573	0.78256	2.01356	0.0440554	0.14773	UP	IYD

## Sheet: down_LPS_Nor
baseMean	log2FoldChange	lfcSE	stat	pvalue	padj	change	gene
105.035	-3.40316	0.442414	-7.69224	1.44582e-14	4.66037e-12	DOWN	LOC100152714
60.5407	-4.40364	0.500144	-8.80475	1.31149e-18	1.06797e-15	DOWN	TMIGD1
57.8448	-6.60314	1.20965	-5.4587	4.79622e-08	1.81762e-06	DOWN	CA7
183.706	-1.69707	0.572771	-2.96291	0.00304749	0.0195727	DOWN	LOC100156062
22.0794	-3.44682	0.72311	-4.76666	1.87305e-06	4.3448e-05	DOWN	HOXC8
146.092	-1.22525	0.281642	-4.35039	1.35894e-05	0.000231304	DOWN	ARHGAP11A
443.06	-1.9298	0.280251	-6.88597	5.73933e-12	8.45704e-10	DOWN	FUNDC1
466.787	-1.74999	0.289607	-6.04263	1.51626e-09	9.19986e-08	DOWN	PPA1
30.2283	-3.7018	0.590628	-6.26757	3.66714e-10	2.8369e-08	DOWN	GCG
41.8045	-5.78089	0.682455	-8.47072	2.43871e-17	1.39747e-14	DOWN	RNF180
35.9143	-3.50757	0.689992	-5.08348	3.70574e-07	1.08589e-05	DOWN	FABP6
116.964	-1.32214	0.25025	-5.28329	1.26883e-07	4.25843e-06	DOWN	CEP192
746.094	-2.46133	0.337153	-7.30032	2.87085e-13	6.34541e-11	DOWN	ANXA4
99.3846	-1.99325	0.41011	-4.86028	1.17218e-06	2.92044e-05	DOWN	FLVCR2
76.195	-1.48893	0.318941	-4.66837	3.03596e-06	6.42577e-05	DOWN	PLIN2
25.0281	-1.28608	0.549699	-2.3396	0.0193042	0.0802028	DOWN	DIAPH3
84.4017	-1.66378	0.332254	-5.00756	5.51234e-07	1.51218e-05	DOWN	NNT
1077.67	-1.81434	0.364137	-4.98256	6.27472e-07	1.67095e-05	DOWN	STAT1
2859.75	-1.28815	0.284084	-4.53438	5.7773e-06	0.000111873	DOWN	LUC7L3
66.7933	-1.65672	0.310269	-5.33961	9.3148e-08	3.24592e-06	DOWN	PTPN13
21.4357	-1.8758	0.5212	-3.59901	0.000319428	0.00317826	DOWN	FSTL3
70.9345	-1.55025	0.386107	-4.01508	5.94268e-05	0.000787876	DOWN	LPL
52.3728	-1.99227	0.450807	-4.41935	9.89998e-06	0.000176468	DOWN	WNT2B
36.1878	-2.49431	0.481398	-5.18138	2.20249e-07	6.82903e-06	DOWN	LOC100156381
80.5023	-2.60002	0.43201	-6.01842	1.76132e-09	1.04812e-07	DOWN	LOC110256043
40.823	-1.66346	0.505605	-3.29003	0.00100176	0.00791587	DOWN	SRBD1
56.3213	-2.02817	0.394247	-5.1444	2.68377e-07	8.17387e-06	DOWN	NEDD4
331.101	-1.46218	0.445934	-3.27891	0.0010421	0.008172	DOWN	CXCL10
465.79	-2.33272	0.399904	-5.8332	5.43737e-09	2.72255e-07	DOWN	CCL19
274.21	-1.86166	0.394515	-4.71885	2.37182e-06	5.31068e-05	DOWN	UBE2L6
127.507	-2.40006	0.32344	-7.42042	1.16745e-13	3.01047e-11	DOWN	LOC100524999
72.8554	-1.3302	0.513015	-2.5929	0.00951705	0.0471645	DOWN	KANK1
62.9331	-1.37149	0.336907	-4.07082	4.68486e-05	0.000650665	DOWN	CENPM
136.951	-1.26471	0.312731	-4.04407	5.25305e-05	0.00071535	DOWN	TOP2A
27.4728	-2.89559	0.498588	-5.80759	6.33794e-09	3.13293e-07	DOWN	SMCO3
466345	-2.28766	0.396392	-5.77121	7.87045e-09	3.80536e-07	DOWN	ND2
92.2672	-1.30225	0.33992	-3.83106	0.000127594	0.00147654	DOWN	TIFA
338764	-2.39549	0.771091	-3.10663	0.00189234	0.0133023	DOWN	ND1
80.2182	-1.64228	0.386742	-4.24644	2.17195e-05	0.000345724	DOWN	LOC100516390
77.9888	-1.39417	0.36042	-3.86819	0.000109645	0.00129895	DOWN	LOC102165634
68.1201	-1.40479	0.365656	-3.84182	0.000122124	0.00142175	DOWN	NCBP1
45.521	-1.42507	0.501487	-2.84168	0.00448762	0.026287	DOWN	HOXC6
48.0271	-1.22361	0.560582	-2.18275	0.0290542	0.109294	DOWN	NKD1
59.2313	-1.67398	0.575479	-2.90885	0.00362759	0.0224555	DOWN	XPNPEP2
27.1785	-1.67325	0.44835	-3.73202	0.00018995	0.00207403	DOWN	SPRTN
48.8984	-1.45912	0.670037	-2.17766	0.0294311	0.110233	DOWN	LOC110255209
37.5525	-2.08694	0.493543	-4.22849	2.35262e-05	0.000370669	DOWN	ECT2
40.9768	-2.03981	0.455781	-4.47542	7.62599e-06	0.000141688	DOWN	PLPP1
61.8248	-1.74781	0.689789	-2.53384	0.0112821	0.05369	DOWN	CXCL9
31.0542	-1.40298	0.545266	-2.57303	0.0100814	0.0491891	DOWN	LOC106507220
54.8516	-2.56202	0.390486	-6.56109	5.34148e-11	5.47307e-09	DOWN	FOXF1
61.8711	-2.20078	0.421387	-5.22271	1.76326e-07	5.61831e-06	DOWN	ACSS3
53.7777	-2.00427	0.47617	-4.20916	2.56326e-05	0.00039671	DOWN	RNF144B
29.795	-1.41675	0.532575	-2.6602	0.00780948	0.0406798	DOWN	COLEC10
42.805	-1.55355	0.391649	-3.9667	7.2876e-05	0.000931849	DOWN	CDKN3
52.9489	-1.4034	0.372118	-3.77138	0.00016235	0.00181494	DOWN	GPX8
245.292	-1.247	0.282439	-4.41511	1.0096e-05	0.000179546	DOWN	CD200
38.6399	-2.3801	0.744455	-3.1971	0.00138816	0.010306	DOWN	SLC26A3
48.0082	-1.51372	0.457629	-3.30775	0.000940488	0.00752391	DOWN	SLPI
39.3682	-3.30329	0.627927	-5.26062	1.43568e-07	4.72614e-06	DOWN	CCL8
38.92	-2.13367	0.44458	-4.79929	1.59229e-06	3.8136e-05	DOWN	RNF152
92.255	-1.28558	0.356076	-3.61041	0.00030571	0.00307538	DOWN	MAD2L1
54.8515	-2.69466	0.4679	-5.75906	8.45842e-09	4.04913e-07	DOWN	NUDT4
29.5333	-2.3562	0.616745	-3.82038	0.000133248	0.00153313	DOWN	LOC102167874
98.1826	-1.45777	0.502473	-2.9012	0.00371742	0.0228172	DOWN	LOC100151816
21.3712	-1.53411	0.623991	-2.45855	0.01395	0.0630953	DOWN	FAHD2B
135.01	-5.80482	0.936005	-6.20169	5.58595e-10	4.05755e-08	DOWN	PAPSS2
29.0048	-1.28408	0.490079	-2.62015	0.00878916	0.0443673	DOWN	RRAGB
94.1119	-1.49285	0.48926	-3.05125	0.00227893	0.0154861	DOWN	IFI44
30.5894	-1.32457	0.52324	-2.53148	0.0113583	0.053973	DOWN	PRDM5
22.959	-1.98502	0.506451	-3.91946	8.87476e-05	0.00109317	DOWN	LOC106509343
24.2398	-8.81964	2.42103	-3.64294	0.000269546	0.00278398	DOWN	CPO
53.4135	-2.4854	0.395737	-6.28043	3.37643e-10	2.62513e-08	DOWN	KIAA1211
31.565	-1.35902	0.446857	-3.04128	0.00235577	0.0158609	DOWN	HDHD5
21.2527	-1.83767	0.762165	-2.41112	0.0159037	0.069559	DOWN	GNA14
20.598	-1.68654	0.560251	-3.01033	0.00260964	0.0173512	DOWN	SAMD11
36.3165	-1.6268	0.497061	-3.27285	0.0010647	0.00831973	DOWN	DUSP10
23.7503	-1.86098	0.561634	-3.31352	0.000921296	0.00742025	DOWN	USP53
25.6255	-2.07042	0.501315	-4.12998	3.62796e-05	0.000530046	DOWN	LOC100525237
19.4251	-1.41036	0.529053	-2.66582	0.00768011	0.0401577	DOWN	HOXD8
18.0562	-1.30452	0.571402	-2.28302	0.0224294	0.0898569	DOWN	CHEK1
20.7468	-1.35751	0.637992	-2.12779	0.0333544	0.120857	DOWN	KDELC1
3352.44	-2.68334	0.443614	-6.04882	1.45912e-09	8.99204e-08	DOWN	SPAI-2
25.2865	-1.48794	0.551638	-2.69732	0.00699006	0.0372854	DOWN	EXO1
43.395	-1.35826	0.57387	-2.36685	0.0179403	0.0760685	DOWN	KCNK2
46.671	-1.2722	0.449998	-2.82712	0.00469683	0.0273296	DOWN	MMP3
24.213	-1.89145	0.566353	-3.3397	0.000838693	0.00689127	DOWN	ANAPC10
21.3049	-1.94673	0.516929	-3.76596	0.000165912	0.00184676	DOWN	PHEX
20.5151	-2.18658	0.550453	-3.97233	7.11716e-05	0.00091459	DOWN	TBPL1
26.2073	-1.21933	0.556205	-2.19222	0.0283636	0.107296	DOWN	HUNK
22.4593	-1.51025	0.523124	-2.88699	0.00388951	0.0236458	DOWN	CDK3
20.7456	-1.41022	0.559319	-2.52132	0.0116917	0.0552346	DOWN	ARL10
35.6893	-2.88598	0.708009	-4.07619	4.57788e-05	0.000638099	DOWN	OSR2
207.525	-5.00042	1.78639	-2.79918	0.0051233	0.029315	DOWN	LOC100621352
14.1753	-3.4537	0.88589	-3.89856	9.67663e-05	0.00117241	DOWN	GP91-PHOX
17.1427	-2.87566	0.832534	-3.45411	0.000552122	0.00493223	DOWN	PDRG1
23.1284	-3.02289	0.728029	-4.15215	3.29361e-05	0.000490933	DOWN	CD5L
17.2361	-1.53378	0.646316	-2.37311	0.017639	0.0750784	DOWN	ALDH1L1
26.9895	-1.43957	0.5902	-2.43911	0.0147233	0.0657429	DOWN	LOC100520512
16.7459	-2.67905	0.74108	-3.61507	0.000300271	0.00303053	DOWN	LOC100522040
60.0628	-3.8814	0.486812	-7.97309	1.54754e-15	6.13939e-13	DOWN	PLB1
