# Supplementary material for: The Metabolic Pathway of Bile Secretion Is Vulnerable to Salmonella enterica Exposure in Porcine Intestinal Epithelial Cells
Source: Animals (Basel). 2024 Mar 3;14(5):789. doi: 10.3390/ani14050789 (PMC10931422; doi:10.3390/ani14050789)
Supplement: Supplementary file 1 [file animals-14-00789-s001.zip › Table S9. GO term enrichment in up- and down-regulated genes that the Salmonella enterica infection and LPS .xlsx]

## Sheet: Up-regulated genes enriched
ID	Description	GeneRatio	BgRatio	pvalue	p.adjust	qvalue	geneID	Count	Ont
GO:0048878	chemical homeostasis	22/151	325/6899	1.89123e-06	1.89123e-06	0.00272934	APOC3/AQP7/ATP2B1/ATP6V0A1/CLDN4/CYBRD1/EDN3/FRRS1/GPER1/HYAL2/LRRC8A/PDX1/SCT/SFTPD/SIDT2/SLC11A2/SLC35G1/SLC40A1/STIM1/TSKU/UGCG/VDR	22	BP
GO:0042592	homeostatic process	26/151	497/6899	2.36444e-05	2.36444e-05	0.0170613	APOC3/AQP7/ATP2B1/ATP6V0A1/CLDN4/CYBRD1/EDN3/FRRS1/GPER1/GPR55/HYAL2/JAK3/LRRC8A/MFSD2A/PDX1/PIK3CD/SCT/SFTPD/SIDT2/SLC11A2/SLC35G1/SLC40A1/STIM1/TSKU/UGCG/VDR	26	BP
GO:0033344	cholesterol efflux	5/151	20/6899	5.58867e-05	5.58867e-05	0.0268845	APOA1/APOC3/PPARG/SCARB1/TSKU	5	BP
GO:0030301	cholesterol transport	6/151	37/6899	0.00013208	0.00013208	0.037051	APOA1/APOC3/FURIN/PPARG/SCARB1/TSKU	6	BP
GO:0055082	cellular chemical homeostasis	14/151	205/6899	0.000146246	0.000146246	0.037051	ATP2B1/ATP6V0A1/CYBRD1/EDN3/FRRS1/GPER1/LRRC8A/PDX1/SCT/SIDT2/SLC35G1/SLC40A1/STIM1/VDR	14	BP
GO:0015918	sterol transport	6/151	38/6899	0.000154041	0.000154041	0.037051	APOA1/APOC3/FURIN/PPARG/SCARB1/TSKU	6	BP
GO:0090207	regulation of triglyceride metabolic process	4/151	16/6899	0.000326943	0.000326943	0.0640267	APOC3/MBOAT7/MFSD2A/SREBF1	4	BP
GO:0044255	cellular lipid metabolic process	19/151	365/6899	0.000354925	0.000354925	0.0640267	ABHD2/APOC3/B3GALT4/BCO1/CYP1A1/ELOVL1/GIP/GPAT3/LPGAT1/LRAT/MBOAT7/MFSD2A/PGAP3/PIGV/PPARG/RETSAT/SMPD3/SREBF1/UGCG	19	BP
GO:0006638	neutral lipid metabolic process	6/151	47/6899	0.000509498	0.000509498	0.0720587	ABHD2/APOC3/GPAT3/MBOAT7/MFSD2A/SREBF1	6	BP
GO:0006639	acylglycerol metabolic process	6/151	47/6899	0.000509498	0.000509498	0.0720587	ABHD2/APOC3/GPAT3/MBOAT7/MFSD2A/SREBF1	6	BP
GO:0030001	metal ion transport	14/151	236/6899	0.000622376	0.000622376	0.0720587	ATP1B3/ATP2B1/CD84/GPER1/KCNG1/KCNJ13/KCNK5/SLC30A10/SLC35G1/SLC5A10/SLC5A4/SPINK1/STIM1/VDR	14	BP
GO:0006869	lipid transport	10/151	133/6899	0.000631458	0.000631458	0.0720587	APOA1/APOC3/FURIN/LRAT/MFSD2A/PPARG/SCARB1/SIGMAR1/TSKU/UGCG	10	BP
GO:0019725	cellular homeostasis	14/151	237/6899	0.000649106	0.000649106	0.0720587	ATP2B1/ATP6V0A1/CYBRD1/EDN3/FRRS1/GPER1/LRRC8A/PDX1/SCT/SIDT2/SLC35G1/SLC40A1/STIM1/VDR	14	BP
GO:0010817	regulation of hormone levels	11/151	161/6899	0.000763123	0.000763123	0.0733258	CYP1A1/FURIN/GIP/GPER1/IYD/LRAT/LRRC8A/PDX1/RETSAT/SCT/SIDT2	11	BP
GO:0032371	regulation of sterol transport	4/151	20/6899	0.000812948	0.000812948	0.0733258	APOA1/APOC3/FURIN/PPARG	4	BP
GO:0032374	regulation of cholesterol transport	4/151	20/6899	0.000812948	0.000812948	0.0733258	APOA1/APOC3/FURIN/PPARG	4	BP
GO:0055080	cation homeostasis	12/151	190/6899	0.000888252	0.000888252	0.074436	ATP2B1/ATP6V0A1/CYBRD1/EDN3/FRRS1/GPER1/HYAL2/SLC11A2/SLC35G1/SLC40A1/STIM1/VDR	12	BP
GO:0055065	metal ion homeostasis	11/151	166/6899	0.000983443	0.000983443	0.074436	ATP2B1/CYBRD1/EDN3/FRRS1/GPER1/HYAL2/SLC11A2/SLC35G1/SLC40A1/STIM1/VDR	11	BP
GO:0015748	organophosphate ester transport	5/151	36/6899	0.00102478	0.00102478	0.074436	APOA1/APOC3/LRRC8A/MFSD2A/SLC37A2	5	BP
GO:0098771	inorganic ion homeostasis	12/151	194/6899	0.00106602	0.00106602	0.074436	ATP2B1/ATP6V0A1/CYBRD1/EDN3/FRRS1/GPER1/HYAL2/SLC11A2/SLC35G1/SLC40A1/STIM1/VDR	12	BP
GO:0006641	triglyceride metabolic process	5/151	37/6899	0.00116427	0.00116427	0.074436	APOC3/GPAT3/MBOAT7/MFSD2A/SREBF1	5	BP
GO:0050801	ion homeostasis	12/151	196/6899	0.00116545	0.00116545	0.074436	ATP2B1/ATP6V0A1/CYBRD1/EDN3/FRRS1/GPER1/HYAL2/SLC11A2/SLC35G1/SLC40A1/STIM1/VDR	12	BP
GO:0019217	regulation of fatty acid metabolic process	4/151	22/6899	0.00118631	0.00118631	0.074436	APOC3/GIP/MFSD2A/PPARG	4	BP
GO:0051049	regulation of transport	21/151	471/6899	0.00132584	0.00132584	0.0753844	APOA1/APOC3/ATP2B1/CD84/FURIN/GIP/GPER1/HYAL2/KCNG1/KCNJ13/LRAT/LRRC8A/P2RY2/PDX1/PPARG/SCT/SFTPD/SIDT2/SLC35F6/SPINK1/STIM1	21	BP
GO:0090277	positive regulation of peptide hormone secretion	4/151	23/6899	0.00141184	0.00141184	0.0753844	GPER1/LRRC8A/PDX1/SCT	4	BP
GO:0006811	ion transport	19/151	409/6899	0.00141705	0.00141705	0.0753844	ATP1B3/ATP2B1/CD84/GPER1/KCNG1/KCNJ13/KCNK5/LRRC8A/OSTM1/SLC16A9/SLC30A10/SLC35G1/SLC37A2/SLC52A2/SLC5A10/SLC5A4/SPINK1/STIM1/VDR	19	BP
GO:0008610	lipid biosynthetic process	14/151	257/6899	0.00142822	0.00142822	0.0753844	ABHD2/APOC3/B3GALT4/ELOVL1/GIP/GPAT3/GPER1/MBOAT7/MFSD2A/PGAP3/PIGV/PPARG/SREBF1/UGCG	14	BP
GO:0055072	iron ion homeostasis	5/151	39/6899	0.00148477	0.00148477	0.0753844	CYBRD1/FRRS1/HYAL2/SLC11A2/SLC40A1	5	BP
GO:0090276	regulation of peptide hormone secretion	6/151	58/6899	0.00157646	0.00157646	0.0753844	GIP/GPER1/LRRC8A/PDX1/SCT/SIDT2	6	BP
GO:0002793	positive regulation of peptide secretion	4/151	24/6899	0.00166566	0.00166566	0.0753844	GPER1/LRRC8A/PDX1/SCT	4	BP
GO:0010876	lipid localization	10/151	151/6899	0.00167633	0.00167633	0.0753844	APOA1/APOC3/FURIN/LRAT/MFSD2A/PPARG/SCARB1/SIGMAR1/TSKU/UGCG	10	BP
GO:0002791	regulation of peptide secretion	6/151	59/6899	0.00172378	0.00172378	0.0753844	GIP/GPER1/LRRC8A/PDX1/SCT/SIDT2	6	BP
GO:0090087	regulation of peptide transport	6/151	59/6899	0.00172378	0.00172378	0.0753844	GIP/GPER1/LRRC8A/PDX1/SCT/SIDT2	6	BP
GO:0019216	regulation of lipid metabolic process	8/151	103/6899	0.00179569	0.00179569	0.0762195	APOC3/GIP/GPER1/MBOAT7/MFSD2A/PPARG/SCT/SREBF1	8	BP
GO:0046890	regulation of lipid biosynthetic process	6/151	60/6899	0.00188132	0.00188132	0.0762861	APOC3/GIP/GPER1/MFSD2A/PPARG/SREBF1	6	BP
GO:0030104	water homeostasis	4/151	25/6899	0.00194953	0.00194953	0.0762861	AQP7/CLDN4/SCT/UGCG	4	BP
GO:0019432	triglyceride biosynthetic process	3/151	12/6899	0.00195584	0.00195584	0.0762861	GPAT3/MFSD2A/SREBF1	3	BP
GO:0015850	organic hydroxy compound transport	7/151	83/6899	0.00216343	0.00216343	0.078778	APOA1/APOC3/AQP7/FURIN/PPARG/SCARB1/TSKU	7	BP
GO:0031638	zymogen activation	4/151	26/6899	0.00226522	0.00226522	0.078778	CTSZ/DMBT1/FURIN/GGT1	4	BP
GO:0008643	carbohydrate transport	5/151	43/6899	0.00231423	0.00231423	0.078778	AQP7/MFSD12/MFSD2A/SLC2A6/SLC2A8	5	BP
GO:0030003	cellular cation homeostasis	10/151	158/6899	0.00234751	0.00234751	0.078778	ATP2B1/ATP6V0A1/CYBRD1/EDN3/FRRS1/GPER1/SLC35G1/SLC40A1/STIM1/VDR	10	BP
GO:0051050	positive regulation of transport	12/151	213/6899	0.00236435	0.00236435	0.078778	APOA1/ATP2B1/GPER1/HYAL2/LRAT/LRRC8A/P2RY2/PDX1/PPARG/SCT/SFTPD/STIM1	12	BP
GO:0002115	store-operated calcium entry	3/151	13/6899	0.00250203	0.00250203	0.078778	CD84/SPINK1/STIM1	3	BP
GO:0046460	neutral lipid biosynthetic process	3/151	13/6899	0.00250203	0.00250203	0.078778	GPAT3/MFSD2A/SREBF1	3	BP
GO:0046463	acylglycerol biosynthetic process	3/151	13/6899	0.00250203	0.00250203	0.078778	GPAT3/MFSD2A/SREBF1	3	BP
GO:0032368	regulation of lipid transport	5/151	44/6899	0.0025656	0.0025656	0.078778	APOA1/APOC3/FURIN/LRAT/PPARG	5	BP
GO:0050796	regulation of insulin secretion	5/151	44/6899	0.0025656	0.0025656	0.078778	GIP/GPER1/LRRC8A/PDX1/SIDT2	5	BP
GO:0006873	cellular ion homeostasis	10/151	162/6899	0.00281894	0.00281894	0.0847536	ATP2B1/ATP6V0A1/CYBRD1/EDN3/FRRS1/GPER1/SLC35G1/SLC40A1/STIM1/VDR	10	BP
GO:1901615	organic hydroxy compound metabolic process	11/151	190/6899	0.00289766	0.00289766	0.0853275	ADH4/APOA1/CYP1A1/GPER1/HAGHL/IYD/LRAT/MFSD12/RETSAT/SREBF1/TSKU	11	BP
GO:0034308	primary alcohol metabolic process	4/151	28/6899	0.00299893	0.00299893	0.0853275	ADH4/CYP1A1/LRAT/RETSAT	4	BP
GO:0001523	retinoid metabolic process	3/151	14/6899	0.00313366	0.00313366	0.0853275	CYP1A1/LRAT/RETSAT	3	BP
GO:0016101	diterpenoid metabolic process	3/151	14/6899	0.00313366	0.00313366	0.0853275	CYP1A1/LRAT/RETSAT	3	BP
GO:1901264	carbohydrate derivative transport	3/151	14/6899	0.00313366	0.00313366	0.0853275	LRRC8A/MFSD2A/SLC37A2	3	BP
GO:0016485	protein processing	6/151	67/6899	0.00330899	0.00330899	0.0869106	CPE/CTSZ/DMBT1/FURIN/GGT1/TLL2	6	BP
GO:0006875	cellular metal ion homeostasis	9/151	139/6899	0.00331224	0.00331224	0.0869106	ATP2B1/CYBRD1/EDN3/FRRS1/GPER1/SLC35G1/SLC40A1/STIM1/VDR	9	BP
GO:0006720	isoprenoid metabolic process	4/151	29/6899	0.00342034	0.00342034	0.0879836	BCO1/CYP1A1/LRAT/RETSAT	4	BP
GO:0046486	glycerolipid metabolic process	9/151	140/6899	0.00347506	0.00347506	0.0879836	ABHD2/APOC3/GPAT3/LPGAT1/MBOAT7/MFSD2A/PGAP3/PIGV/SREBF1	9	BP
GO:0071375	cellular response to peptide hormone stimulus	6/151	69/6899	0.00383546	0.00383546	0.092716	ATP2B1/GPER1/JAK3/MZB1/PPARG/SLC2A8	6	BP
GO:0032024	positive regulation of insulin secretion	3/151	15/6899	0.00385471	0.00385471	0.092716	GPER1/LRRC8A/PDX1	3	BP
GO:0042304	regulation of fatty acid biosynthetic process	3/151	15/6899	0.00385471	0.00385471	0.092716	APOC3/GIP/PPARG	3	BP
GO:0062012	regulation of small molecule metabolic process	7/151	93/6899	0.004118	0.004118	0.0974249	APOC3/GIP/GPER1/MFSD2A/PPARG/SREBF1/TFF3	7	BP
GO:0030072	peptide hormone secretion	6/151	72/6899	0.00473843	0.00473843	0.110295	GIP/GPER1/LRRC8A/PDX1/SCT/SIDT2	6	BP
GO:0002790	peptide secretion	6/151	73/6899	0.00507158	0.00507158	0.114361	GIP/GPER1/LRRC8A/PDX1/SCT/SIDT2	6	BP
GO:0050708	regulation of protein secretion	6/151	73/6899	0.00507158	0.00507158	0.114361	GIP/GPER1/LRRC8A/PDX1/PPARG/SIDT2	6	BP
GO:0006721	terpenoid metabolic process	3/151	17/6899	0.00557921	0.00557921	0.123872	CYP1A1/LRAT/RETSAT	3	BP
GO:1905952	regulation of lipid localization	5/151	53/6899	0.00579312	0.00579312	0.126672	APOA1/APOC3/FURIN/LRAT/PPARG	5	BP
GO:0006066	alcohol metabolic process	8/151	125/6899	0.00593758	0.00593758	0.127295	ADH4/APOA1/CYP1A1/GPER1/LRAT/RETSAT/SREBF1/TSKU	8	BP
GO:0006812	cation transport	14/151	301/6899	0.00601718	0.00601718	0.127295	ATP1B3/ATP2B1/CD84/GPER1/KCNG1/KCNJ13/KCNK5/SLC30A10/SLC35G1/SLC5A10/SLC5A4/SPINK1/STIM1/VDR	14	BP
GO:0009247	glycolipid biosynthetic process	4/151	34/6899	0.00613733	0.00613733	0.127295	B3GALT4/PGAP3/PIGV/UGCG	4	BP
GO:0045017	glycerolipid biosynthetic process	6/151	76/6899	0.00617439	0.00617439	0.127295	GPAT3/MBOAT7/MFSD2A/PGAP3/PIGV/SREBF1	6	BP
GO:0030073	insulin secretion	5/151	54/6899	0.00627397	0.00627397	0.127526	GIP/GPER1/LRRC8A/PDX1/SIDT2	5	BP
GO:0001678	cellular glucose homeostasis	4/151	35/6899	0.00681336	0.00681336	0.134695	GPER1/LRRC8A/PDX1/SIDT2	4	BP
GO:0045834	positive regulation of lipid metabolic process	4/151	35/6899	0.00681336	0.00681336	0.134695	MFSD2A/PPARG/SCT/SREBF1	4	BP
GO:0046883	regulation of hormone secretion	6/151	78/6899	0.00700063	0.00700063	0.136527	GIP/GPER1/LRRC8A/PDX1/SCT/SIDT2	6	BP
GO:0006816	calcium ion transport	7/151	104/6899	0.00756931	0.00756931	0.144023	ATP2B1/CD84/GPER1/SLC35G1/SPINK1/STIM1/VDR	7	BP
GO:0007340	acrosome reaction	3/151	19/6899	0.00770016	0.00770016	0.144023	ABHD2/B4GALT1/SPINK1	3	BP
GO:0007589	body fluid secretion	3/151	19/6899	0.00770016	0.00770016	0.144023	P2RY2/SCT/VDR	3	BP
GO:0042157	lipoprotein metabolic process	5/151	57/6899	0.007884	0.007884	0.144023	APOA1/APOC3/PGAP3/PIGV/UGCG	5	BP
GO:0055076	transition metal ion homeostasis	5/151	57/6899	0.007884	0.007884	0.144023	CYBRD1/FRRS1/HYAL2/SLC11A2/SLC40A1	5	BP
GO:0046887	positive regulation of hormone secretion	4/151	37/6899	0.00830938	0.00830938	0.145816	GPER1/LRRC8A/PDX1/SCT	4	BP
GO:0050714	positive regulation of protein secretion	4/151	37/6899	0.00830938	0.00830938	0.145816	GPER1/LRRC8A/PDX1/PPARG	4	BP
GO:0015833	peptide transport	6/151	81/6899	0.00838628	0.00838628	0.145816	GIP/GPER1/LRRC8A/PDX1/SCT/SIDT2	6	BP
GO:1901653	cellular response to peptide	6/151	81/6899	0.00838628	0.00838628	0.145816	ATP2B1/GPER1/JAK3/MZB1/PPARG/SLC2A8	6	BP
GO:0097006	regulation of plasma lipoprotein particle levels	3/151	20/6899	0.00891555	0.00891555	0.146432	APOC3/MFSD2A/SCARB1	3	BP
GO:0006633	fatty acid biosynthetic process	5/151	59/6899	0.00910454	0.00910454	0.146432	ABHD2/APOC3/ELOVL1/GIP/PPARG	5	BP
GO:0007586	digestion	4/151	38/6899	0.00913198	0.00913198	0.146432	CCK/SCT/UGCG/VDR	4	BP
GO:0009746	response to hexose	4/151	38/6899	0.00913198	0.00913198	0.146432	GIP/GPER1/PDX1/SIDT2	4	BP
GO:0009749	response to glucose	4/151	38/6899	0.00913198	0.00913198	0.146432	GIP/GPER1/PDX1/SIDT2	4	BP
GO:0010565	regulation of cellular ketone metabolic process	4/151	38/6899	0.00913198	0.00913198	0.146432	APOC3/GIP/MFSD2A/PPARG	4	BP
GO:0034284	response to monosaccharide	4/151	38/6899	0.00913198	0.00913198	0.146432	GIP/GPER1/PDX1/SIDT2	4	BP
GO:0051047	positive regulation of secretion	6/151	83/6899	0.00941317	0.00941317	0.149282	GPER1/LRRC8A/P2RY2/PDX1/PPARG/SCT	6	BP
GO:0021766	hippocampus development	3/151	21/6899	0.0102369	0.0102369	0.158855	MFSD2A/SCT/TSKU	3	BP
GO:0046889	positive regulation of lipid biosynthetic process	3/151	21/6899	0.0102369	0.0102369	0.158855	MFSD2A/PPARG/SREBF1	3	BP
GO:0009743	response to carbohydrate	4/151	40/6899	0.0109325	0.0109325	0.167843	GIP/GPER1/PDX1/SIDT2	4	BP
GO:0051222	positive regulation of protein transport	5/151	62/6899	0.0111709	0.0111709	0.169698	GPER1/HYAL2/LRRC8A/PDX1/PPARG	5	BP
GO:0050891	multicellular organismal water homeostasis	3/151	22/6899	0.011666	0.011666	0.171013	AQP7/CLDN4/UGCG	3	BP
GO:0050994	regulation of lipid catabolic process	3/151	22/6899	0.011666	0.011666	0.171013	APOC3/MFSD2A/SCT	3	BP
GO:0050878	regulation of body fluid levels	7/151	113/6899	0.0117011	0.0117011	0.171013	AQP7/CLDN4/F10/P2RY2/SCT/UGCG/VDR	7	BP
GO:0006874	cellular calcium ion homeostasis	6/151	87/6899	0.0117314	0.0117314	0.171013	ATP2B1/EDN3/GPER1/SLC35G1/STIM1/VDR	6	BP
GO:0048871	multicellular organismal homeostasis	8/151	141/6899	0.0119365	0.0119365	0.172262	AQP7/CLDN4/GPR55/HYAL2/MFSD2A/SFTPD/TSKU/UGCG	8	BP
GO:0046394	carboxylic acid biosynthetic process	7/151	114/6899	0.0122443	0.0122443	0.17324	ABHD2/APOC3/ELOVL1/GGT1/GIP/PPARG/RGN	7	BP
GO:0051223	regulation of protein transport	7/151	114/6899	0.0122443	0.0122443	0.17324	GIP/GPER1/HYAL2/LRRC8A/PDX1/PPARG/SIDT2	7	BP
GO:0016053	organic acid biosynthetic process	7/151	115/6899	0.0128055	0.0128055	0.175743	ABHD2/APOC3/ELOVL1/GGT1/GIP/PPARG/RGN	7	BP
GO:0006664	glycolipid metabolic process	4/151	42/6899	0.0129475	0.0129475	0.175743	B3GALT4/PGAP3/PIGV/UGCG	4	BP
GO:0021543	pallium development	4/151	42/6899	0.0129475	0.0129475	0.175743	MBOAT7/MFSD2A/SCT/TSKU	4	BP
GO:1903509	liposaccharide metabolic process	4/151	42/6899	0.0129475	0.0129475	0.175743	B3GALT4/PGAP3/PIGV/UGCG	4	BP
GO:0042886	amide transport	6/151	89/6899	0.0130301	0.0130301	0.175743	GIP/GPER1/LRRC8A/PDX1/SCT/SIDT2	6	BP
GO:0051924	regulation of calcium ion transport	5/151	65/6899	0.0135365	0.0135365	0.180883	ATP2B1/CD84/GPER1/SPINK1/STIM1	5	BP
GO:0055074	calcium ion homeostasis	6/151	90/6899	0.0137159	0.0137159	0.181598	ATP2B1/EDN3/GPER1/SLC35G1/STIM1/VDR	6	BP
GO:0043434	response to peptide hormone	6/151	91/6899	0.0144266	0.0144266	0.189271	ATP2B1/GPER1/JAK3/MZB1/PPARG/SLC2A8	6	BP
GO:0046903	secretion	12/151	269/6899	0.0146082	0.0146082	0.189927	CD84/FURIN/GIP/GPER1/LRRC8A/P2RY2/PDX1/PPARG/SCAMP1/SCT/SIDT2/VDR	12	BP
GO:1904951	positive regulation of establishment of protein localization	5/151	67/6899	0.0152887	0.0152887	0.197	GPER1/HYAL2/LRRC8A/PDX1/PPARG	5	BP
GO:0032870	cellular response to hormone stimulus	8/151	148/6899	0.015638	0.015638	0.198114	ABHD2/ATP2B1/GPER1/JAK3/MZB1/PPARG/SLC2A8/UGCG	8	BP
GO:0051046	regulation of secretion	9/151	178/6899	0.0158791	0.0158791	0.198114	CD84/GIP/GPER1/LRRC8A/P2RY2/PDX1/PPARG/SCT/SIDT2	9	BP
GO:0046879	hormone secretion	6/151	93/6899	0.0159243	0.0159243	0.198114	GIP/GPER1/LRRC8A/PDX1/SCT/SIDT2	6	BP
GO:0051604	protein maturation	6/151	93/6899	0.0159243	0.0159243	0.198114	CPE/CTSZ/DMBT1/FURIN/GGT1/TLL2	6	BP
GO:0051896	regulation of protein kinase B signaling	4/151	45/6899	0.0163901	0.0163901	0.201459	GPER1/HBEGF/HYAL2/PIK3CD	4	BP
GO:0070201	regulation of establishment of protein localization	7/151	121/6899	0.0165687	0.0165687	0.201459	GIP/GPER1/HYAL2/LRRC8A/PDX1/PPARG/SIDT2	7	BP
GO:0015914	phospholipid transport	3/151	25/6899	0.0166119	0.0166119	0.201459	APOA1/APOC3/MFSD2A	3	BP
GO:0042180	cellular ketone metabolic process	5/151	70/6899	0.0181917	0.0181917	0.2117	APOC3/GIP/HAGHL/MFSD2A/PPARG	5	BP
GO:0042445	hormone metabolic process	5/151	70/6899	0.0181917	0.0181917	0.2117	CYP1A1/FURIN/IYD/LRAT/RETSAT	5	BP
GO:0009914	hormone transport	6/151	96/6899	0.0183677	0.0183677	0.2117	GIP/GPER1/LRRC8A/PDX1/SCT/SIDT2	6	BP
GO:0006879	cellular iron ion homeostasis	3/151	26/6899	0.0184832	0.0184832	0.2117	CYBRD1/FRRS1/SLC40A1	3	BP
GO:0071326	cellular response to monosaccharide stimulus	3/151	26/6899	0.0184832	0.0184832	0.2117	GPER1/PDX1/SIDT2	3	BP
GO:0071331	cellular response to hexose stimulus	3/151	26/6899	0.0184832	0.0184832	0.2117	GPER1/PDX1/SIDT2	3	BP
GO:0071333	cellular response to glucose stimulus	3/151	26/6899	0.0184832	0.0184832	0.2117	GPER1/PDX1/SIDT2	3	BP
GO:0010874	regulation of cholesterol efflux	2/151	10/6899	0.0190843	0.0190843	0.211859	APOA1/PPARG	2	BP
GO:0033561	regulation of water loss via skin	2/151	10/6899	0.0190843	0.0190843	0.211859	CLDN4/UGCG	2	BP
GO:0045742	positive regulation of epidermal growth factor receptor signaling pathway	2/151	10/6899	0.0190843	0.0190843	0.211859	GPER1/HBEGF	2	BP
GO:1902932	positive regulation of alcohol biosynthetic process	2/151	10/6899	0.0190843	0.0190843	0.211859	GPER1/SREBF1	2	BP
GO:0008361	regulation of cell size	4/151	48/6899	0.0203578	0.0203578	0.218792	LRRC8A/SCT/SEMA6A/ZFYVE27	4	BP
GO:0032869	cellular response to insulin stimulus	4/151	48/6899	0.0203578	0.0203578	0.218792	ATP2B1/MZB1/PPARG/SLC2A8	4	BP
GO:0032370	positive regulation of lipid transport	3/151	27/6899	0.0204668	0.0204668	0.218792	APOA1/LRAT/PPARG	3	BP
GO:0051928	positive regulation of calcium ion transport	3/151	27/6899	0.0204668	0.0204668	0.218792	ATP2B1/GPER1/STIM1	3	BP
GO:0071322	cellular response to carbohydrate stimulus	3/151	27/6899	0.0204668	0.0204668	0.218792	GPER1/PDX1/SIDT2	3	BP
GO:0072503	cellular divalent inorganic cation homeostasis	6/151	99/6899	0.0210569	0.0210569	0.223444	ATP2B1/EDN3/GPER1/SLC35G1/STIM1/VDR	6	BP
GO:0010959	regulation of metal ion transport	6/151	100/6899	0.0220096	0.0220096	0.228855	ATP2B1/CD84/GPER1/KCNG1/SPINK1/STIM1	6	BP
GO:1902532	negative regulation of intracellular signal transduction	8/151	158/6899	0.022282	0.022282	0.228855	CASTOR2/GPER1/HYAL2/PDX1/PTTG1IP/RGS14/SEMA6A/SPINK1	8	BP
GO:0072330	monocarboxylic acid biosynthetic process	5/151	74/6899	0.0225982	0.0225982	0.228855	ABHD2/APOC3/ELOVL1/GIP/PPARG	5	BP
GO:0009306	protein secretion	6/151	101/6899	0.0229911	0.0229911	0.228855	GIP/GPER1/LRRC8A/PDX1/PPARG/SIDT2	6	BP
GO:0002474	antigen processing and presentation of peptide antigen via MHC class I	2/151	11/6899	0.022994	0.022994	0.228855	MFSD6/TAPBP	2	BP
GO:0032373	positive regulation of sterol transport	2/151	11/6899	0.022994	0.022994	0.228855	APOA1/PPARG	2	BP
GO:0032376	positive regulation of cholesterol transport	2/151	11/6899	0.022994	0.022994	0.228855	APOA1/PPARG	2	BP
GO:0032941	secretion by tissue	2/151	11/6899	0.022994	0.022994	0.228855	P2RY2/SCT	2	BP
GO:0045922	negative regulation of fatty acid metabolic process	2/151	11/6899	0.022994	0.022994	0.228855	APOC3/MFSD2A	2	BP
GO:0006631	fatty acid metabolic process	7/151	130/6899	0.0235921	0.0235921	0.233155	ABHD2/APOC3/CYP1A1/ELOVL1/GIP/MFSD2A/PPARG	7	BP
GO:0007169	transmembrane receptor protein tyrosine kinase signaling pathway	9/151	191/6899	0.0239458	0.0239458	0.233155	EFNA1/FRK/GPER1/HBEGF/JAK3/MZB1/PIK3CD/SEMA6A/SLC2A8	9	BP
GO:0035592	establishment of protein localization to extracellular region	6/151	102/6899	0.0240016	0.0240016	0.233155	GIP/GPER1/LRRC8A/PDX1/PPARG/SIDT2	6	BP
GO:0006749	glutathione metabolic process	3/151	29/6899	0.0247718	0.0247718	0.233155	GCLC/GGT1/GSTK1	3	BP
GO:0010977	negative regulation of neuron projection development	3/151	29/6899	0.0247718	0.0247718	0.233155	EFNA1/SEMA6A/TSKU	3	BP
GO:0021761	limbic system development	3/151	29/6899	0.0247718	0.0247718	0.233155	MFSD2A/SCT/TSKU	3	BP
GO:0001818	negative regulation of cytokine production	5/151	76/6899	0.0250401	0.0250401	0.233155	ATP2B1/CD84/FURIN/RNF128/TSKU	5	BP
GO:0006575	cellular modified amino acid metabolic process	5/151	76/6899	0.0250401	0.0250401	0.233155	GCLC/GGT1/GSTK1/IYD/MFSD2A	5	BP
GO:0002683	negative regulation of immune system process	6/151	103/6899	0.0250416	0.0250416	0.233155	CD84/GPER1/GPR55/PVRIG/TMEM176B/VSIR	6	BP
GO:0071692	protein localization to extracellular region	6/151	103/6899	0.0250416	0.0250416	0.233155	GIP/GPER1/LRRC8A/PDX1/PPARG/SIDT2	6	BP
GO:0140352	export from cell	11/151	258/6899	0.0256399	0.0256399	0.235067	CD84/FURIN/GIP/GPER1/LRRC8A/PDX1/PPARG/SCAMP1/SCT/SIDT2/SLC35G1	11	BP
GO:0072507	divalent inorganic cation homeostasis	6/151	104/6899	0.0261114	0.0261114	0.235067	ATP2B1/EDN3/GPER1/SLC35G1/STIM1/VDR	6	BP
GO:0009725	response to hormone	9/151	195/6899	0.026931	0.026931	0.235067	ABHD2/ATP2B1/GPER1/JAK3/MZB1/POR/PPARG/SLC2A8/UGCG	9	BP
GO:0003309	type B pancreatic cell differentiation	2/151	12/6899	0.0272016	0.0272016	0.235067	PDX1/SIDT2	2	BP
GO:0006688	glycosphingolipid biosynthetic process	2/151	12/6899	0.0272016	0.0272016	0.235067	B3GALT4/UGCG	2	BP
GO:0034381	plasma lipoprotein particle clearance	2/151	12/6899	0.0272016	0.0272016	0.235067	APOC3/SCARB1	2	BP
GO:0038084	vascular endothelial growth factor signaling pathway	2/151	12/6899	0.0272016	0.0272016	0.235067	PIK3CD/SEMA6A	2	BP
GO:0061178	regulation of insulin secretion involved in cellular response to glucose stimulus	2/151	12/6899	0.0272016	0.0272016	0.235067	PDX1/SIDT2	2	BP
GO:0071634	regulation of transforming growth factor beta production	2/151	12/6899	0.0272016	0.0272016	0.235067	FURIN/TSKU	2	BP
GO:1901186	positive regulation of ERBB signaling pathway	2/151	12/6899	0.0272016	0.0272016	0.235067	GPER1/HBEGF	2	BP
GO:1903670	regulation of sprouting angiogenesis	2/151	12/6899	0.0272016	0.0272016	0.235067	PPP1R16B/SEMA6A	2	BP
GO:1905953	negative regulation of lipid localization	2/151	12/6899	0.0272016	0.0272016	0.235067	APOC3/PPARG	2	BP
GO:1903532	positive regulation of secretion by cell	5/151	78/6899	0.0276455	0.0276455	0.237481	GPER1/LRRC8A/PDX1/PPARG/SCT	5	BP
GO:1901652	response to peptide	6/151	106/6899	0.0283413	0.0283413	0.242017	ATP2B1/GPER1/JAK3/MZB1/PPARG/SLC2A8	6	BP
GO:0050829	defense response to Gram-negative bacterium	3/151	31/6899	0.0295265	0.0295265	0.250655	BPI/DMBT1/LYPD8	3	BP
GO:1903530	regulation of secretion by cell	8/151	167/6899	0.0297857	0.0297857	0.251377	CD84/GIP/GPER1/LRRC8A/PDX1/PPARG/SCT/SIDT2	8	BP
GO:0071417	cellular response to organonitrogen compound	7/151	137/6899	0.0303108	0.0303108	0.252688	AOC1/ATP2B1/GPER1/JAK3/MZB1/PPARG/SLC2A8	7	BP
GO:0030335	positive regulation of cell migration	7/151	138/6899	0.0313658	0.0313658	0.252688	CD99L2/CLDN4/GPER1/HBEGF/PIK3CD/RHOD/SEMA6A	7	BP
GO:0035883	enteroendocrine cell differentiation	2/151	13/6899	0.0316924	0.0316924	0.252688	PDX1/SIDT2	2	BP
GO:0048240	sperm capacitation	2/151	13/6899	0.0316924	0.0316924	0.252688	ABHD2/SPINK1	2	BP
GO:0051898	negative regulation of protein kinase B signaling	2/151	13/6899	0.0316924	0.0316924	0.252688	GPER1/HYAL2	2	BP
GO:0071604	transforming growth factor beta production	2/151	13/6899	0.0316924	0.0316924	0.252688	FURIN/TSKU	2	BP
GO:0071825	protein-lipid complex subunit organization	2/151	13/6899	0.0316924	0.0316924	0.252688	APOC3/MFSD2A	2	BP
GO:0071827	plasma lipoprotein particle organization	2/151	13/6899	0.0316924	0.0316924	0.252688	APOC3/MFSD2A	2	BP
GO:0090303	positive regulation of wound healing	2/151	13/6899	0.0316924	0.0316924	0.252688	CLDN4/HBEGF	2	BP
GO:0097009	energy homeostasis	2/151	13/6899	0.0316924	0.0316924	0.252688	MFSD2A/TSKU	2	BP
GO:0006643	membrane lipid metabolic process	5/151	81/6899	0.0318671	0.0318671	0.252688	B3GALT4/PGAP3/PIGV/SMPD3/UGCG	5	BP
GO:0015698	inorganic anion transport	3/151	32/6899	0.0320718	0.0320718	0.252922	LRRC8A/OSTM1/SLC37A2	3	BP
GO:0043409	negative regulation of MAPK cascade	4/151	56/6899	0.0336366	0.0336366	0.26382	GPER1/HYAL2/RGS14/SEMA6A	4	BP
GO:0009100	glycoprotein metabolic process	7/151	141/6899	0.0346785	0.0346785	0.268012	B3GALT4/B3GNT8/B4GALT1/LOC100513844/MAN1A2/PXYLP1/ST6GALNAC4	7	BP
GO:0022600	digestive system process	3/151	33/6899	0.0347282	0.0347282	0.268012	SCT/UGCG/VDR	3	BP
GO:1905954	positive regulation of lipid localization	3/151	33/6899	0.0347282	0.0347282	0.268012	APOA1/LRAT/PPARG	3	BP
GO:0032940	secretion by cell	10/151	238/6899	0.0355556	0.0355556	0.272938	CD84/FURIN/GIP/GPER1/LRRC8A/PDX1/PPARG/SCAMP1/SCT/SIDT2	10	BP
GO:0014909	smooth muscle cell migration	2/151	14/6899	0.0364522	0.0364522	0.275426	ABHD2/GPER1	2	BP
GO:0035773	insulin secretion involved in cellular response to glucose stimulus	2/151	14/6899	0.0364522	0.0364522	0.275426	PDX1/SIDT2	2	BP
GO:1903036	positive regulation of response to wounding	2/151	14/6899	0.0364522	0.0364522	0.275426	CLDN4/HBEGF	2	BP
GO:0006939	smooth muscle contraction	3/151	34/6899	0.0374951	0.0374951	0.278924	ATP2B1/EDN3/GPER1	3	BP
GO:0034754	cellular hormone metabolic process	3/151	34/6899	0.0374951	0.0374951	0.278924	CYP1A1/LRAT/RETSAT	3	BP
GO:0120254	olefinic compound metabolic process	3/151	34/6899	0.0374951	0.0374951	0.278924	CYP1A1/LRAT/RETSAT	3	BP
GO:0006644	phospholipid metabolic process	7/151	146/6899	0.0407031	0.0407031	0.301236	GPAT3/LPGAT1/MBOAT7/MFSD2A/PGAP3/PIGV/SMPD3	7	BP
GO:0006884	cell volume homeostasis	2/151	15/6899	0.0414672	0.0414672	0.303776	LRRC8A/SCT	2	BP
GO:0050892	intestinal absorption	2/151	15/6899	0.0414672	0.0414672	0.303776	UGCG/VDR	2	BP
GO:0018212	peptidyl-tyrosine modification	5/151	88/6899	0.0432212	0.0432212	0.312873	EFNA1/HBEGF/JAK3/SPINK1/TPST2	5	BP
GO:2000147	positive regulation of cell motility	7/151	148/6899	0.0432931	0.0432931	0.312873	CD99L2/CLDN4/GPER1/HBEGF/PIK3CD/RHOD/SEMA6A	7	BP
GO:1901135	carbohydrate derivative metabolic process	14/151	387/6899	0.0433984	0.0433984	0.312873	B3GALT4/B3GNT8/B4GALT1/ELOVL1/GPAT3/GPD1/HYAL2/LOC100513844/MAN1A2/PGAP3/PIGV/PXYLP1/ST6GALNAC4/UGCG	14	BP
GO:0043491	protein kinase B signaling	4/151	61/6899	0.0439944	0.0439944	0.312873	GPER1/HBEGF/HYAL2/PIK3CD	4	BP
GO:0050679	positive regulation of epithelial cell proliferation	4/151	61/6899	0.0439944	0.0439944	0.312873	B4GALT1/PDX1/PIK3CD/PPP1R16B	4	BP
GO:1901137	carbohydrate derivative biosynthetic process	10/151	247/6899	0.0440099	0.0440099	0.312873	B3GALT4/B3GNT8/B4GALT1/ELOVL1/LOC100513844/PGAP3/PIGV/PXYLP1/ST6GALNAC4/UGCG	10	BP
GO:0021537	telencephalon development	4/151	62/6899	0.046258	0.046258	0.318068	MBOAT7/MFSD2A/SCT/TSKU	4	BP
GO:0046467	membrane lipid biosynthetic process	4/151	62/6899	0.046258	0.046258	0.318068	B3GALT4/PGAP3/PIGV/UGCG	4	BP
GO:0062013	positive regulation of small molecule metabolic process	3/151	37/6899	0.0464488	0.0464488	0.318068	GPER1/PPARG/SREBF1	3	BP
GO:0007585	respiratory gaseous exchange by respiratory system	2/151	16/6899	0.0467242	0.0467242	0.318068	MAN1A2/SFTPD	2	BP
GO:0031018	endocrine pancreas development	2/151	16/6899	0.0467242	0.0467242	0.318068	PDX1/SIDT2	2	BP
GO:0035924	cellular response to vascular endothelial growth factor stimulus	2/151	16/6899	0.0467242	0.0467242	0.318068	PIK3CD/SEMA6A	2	BP
GO:0045123	cellular extravasation	2/151	16/6899	0.0467242	0.0467242	0.318068	CD99L2/JAML	2	BP
GO:0046470	phosphatidylcholine metabolic process	2/151	16/6899	0.0467242	0.0467242	0.318068	MBOAT7/MFSD2A	2	BP
GO:0051353	positive regulation of oxidoreductase activity	2/151	16/6899	0.0467242	0.0467242	0.318068	EDN3/VDR	2	BP
GO:0007167	enzyme-linked receptor protein signaling pathway	11/151	286/6899	0.048531	0.048531	0.326125	ACVR1B/EFNA1/FRK/GPER1/HBEGF/JAK3/LOC100152566/MZB1/PIK3CD/SEMA6A/SLC2A8	11	BP
GO:0006813	potassium ion transport	4/151	63/6899	0.0485857	0.0485857	0.326125	ATP1B3/KCNG1/KCNJ13/KCNK5	4	BP
GO:0046488	phosphatidylinositol metabolic process	4/151	63/6899	0.0485857	0.0485857	0.326125	LPGAT1/MBOAT7/PGAP3/PIGV	4	BP
GO:0044283	small molecule biosynthetic process	9/151	218/6899	0.0493144	0.0493144	0.329484	ABHD2/APOC3/ELOVL1/GGT1/GIP/GPER1/PPARG/RGN/SREBF1	9	BP
GO:0031984	organelle subcompartment	26/191	459/7848	4.38456e-05	4.38456e-05	0.00582288	B4GALT1/CYP1A1/CYP3A29/CYP3A46/ELOVL1/FURIN/GPAT3/GPER1/LOC100513844/LPGAT1/MOGAT2/PIGV/POR/RETSAT/RNF26/SCAMP1/SCAMP2/SCAMP4/SIGMAR1/SLC35G1/SLC37A2/SPPL2B/SREBF1/STIM1/TMEM115/ZFYVE27	26	CC
GO:0005765	lysosomal membrane	9/191	77/7848	9.5926e-05	9.5926e-05	0.00582288	CDIP1/CYBRD1/LRRC8A/OSTM1/SIDT2/SLC29A3/SLC35F6/SPPL2B/TM4SF5	9	CC
GO:0098852	lytic vacuole membrane	9/191	77/7848	9.5926e-05	9.5926e-05	0.00582288	CDIP1/CYBRD1/LRRC8A/OSTM1/SIDT2/SLC29A3/SLC35F6/SPPL2B/TM4SF5	9	CC
GO:0005774	vacuolar membrane	10/191	99/7848	0.00013697	0.00013697	0.00623424	ATP6V0A1/CDIP1/CYBRD1/LRRC8A/OSTM1/SIDT2/SLC29A3/SLC35F6/SPPL2B/TM4SF5	10	CC
GO:0000323	lytic vacuole	13/191	167/7848	0.000205405	0.000205405	0.00623424	CDIP1/CTSZ/CYBRD1/HYAL2/LRRC8A/MFSD12/OSTM1/RNASET2/SIDT2/SLC29A3/SLC35F6/SPPL2B/TM4SF5	13	CC
GO:0005764	lysosome	13/191	167/7848	0.000205405	0.000205405	0.00623424	CDIP1/CTSZ/CYBRD1/HYAL2/LRRC8A/MFSD12/OSTM1/RNASET2/SIDT2/SLC29A3/SLC35F6/SPPL2B/TM4SF5	13	CC
GO:0005773	vacuole	14/191	200/7848	0.000355175	0.000355175	0.00923989	ATP6V0A1/CDIP1/CTSZ/CYBRD1/HYAL2/LRRC8A/MFSD12/OSTM1/RNASET2/SIDT2/SLC29A3/SLC35F6/SPPL2B/TM4SF5	14	CC
GO:0005794	Golgi apparatus	23/191	469/7848	0.000981436	0.000981436	0.0200154	B3GALT4/B3GNT8/B4GALT1/CDH1/CPE/FURIN/GLYCTK/GPER1/LOC100152566/LOC100513844/MAN1A2/NUCB1/PGAP3/PXYLP1/RNF128/SCAMP1/SCAMP2/SCAMP4/SREBF1/ST6GALNAC4/TMEM115/TPST2/UGCG	23	CC
GO:0055038	recycling endosome membrane	4/191	19/7848	0.000989198	0.000989198	0.0200154	SCAMP1/SCAMP2/SCAMP4/ZFYVE27	4	CC
GO:0031226	intrinsic component of plasma membrane	22/191	450/7848	0.00132124	0.00132124	0.0240605	ACVR1B/AQP7/ATP1B3/ATP2B1/CLDN4/EFNA1/GPR55/HBEGF/HYAL2/IYD/KCNG1/KCNK5/LOC106507519/LRRC8A/MFSD2A/SEMA6A/SLC16A1/SLC16A9/SLC2A8/SLC52A2/SLC6A8/TSPAN1	22	CC
GO:0030659	cytoplasmic vesicle membrane	14/191	232/7848	0.00153392	0.00153392	0.025394	ATP2B1/CDIP1/CPE/DMBT1/GPER1/IYD/SCAMP1/SCAMP2/SCAMP4/SPPL2B/SREBF1/STARD3/TMEM184A/ZFYVE27	14	CC
GO:0012506	vesicle membrane	14/191	237/7848	0.00187527	0.00187527	0.028458	ATP2B1/CDIP1/CPE/DMBT1/GPER1/IYD/SCAMP1/SCAMP2/SCAMP4/SPPL2B/SREBF1/STARD3/TMEM184A/ZFYVE27	14	CC
GO:0005789	endoplasmic reticulum membrane	18/191	356/7848	0.00254067	0.00254067	0.0347991	CYP1A1/CYP3A29/CYP3A46/ELOVL1/GPAT3/LPGAT1/MOGAT2/PIGV/POR/RETSAT/RNF26/SIGMAR1/SLC35G1/SLC37A2/SPPL2B/SREBF1/STIM1/ZFYVE27	18	CC
GO:0042175	nuclear outer membrane-endoplasmic reticulum membrane network	18/191	358/7848	0.00269942	0.00269942	0.0347991	CYP1A1/CYP3A29/CYP3A46/ELOVL1/GPAT3/LPGAT1/MOGAT2/PIGV/POR/RETSAT/RNF26/SIGMAR1/SLC35G1/SLC37A2/SPPL2B/SREBF1/STIM1/ZFYVE27	18	CC
GO:0098827	endoplasmic reticulum subcompartment	18/191	360/7848	0.0028664	0.0028664	0.0347991	CYP1A1/CYP3A29/CYP3A46/ELOVL1/GPAT3/LPGAT1/MOGAT2/PIGV/POR/RETSAT/RNF26/SIGMAR1/SLC35G1/SLC37A2/SPPL2B/SREBF1/STIM1/ZFYVE27	18	CC
GO:0005887	integral component of plasma membrane	20/191	426/7848	0.00350561	0.00350561	0.0398994	ACVR1B/AQP7/ATP1B3/ATP2B1/CLDN4/GPR55/HBEGF/IYD/KCNG1/KCNK5/LOC106507519/LRRC8A/MFSD2A/SEMA6A/SLC16A1/SLC16A9/SLC2A8/SLC52A2/SLC6A8/TSPAN1	20	CC
GO:0098791	Golgi apparatus subcompartment	8/191	105/7848	0.00395633	0.00395633	0.0423805	B4GALT1/FURIN/GPER1/LOC100513844/SCAMP1/SCAMP2/SCAMP4/TMEM115	8	CC
GO:0032588	trans-Golgi network membrane	3/191	14/7848	0.00423733	0.00423733	0.0428689	SCAMP1/SCAMP2/SCAMP4	3	CC
GO:0000139	Golgi membrane	10/191	159/7848	0.00533362	0.00533362	0.0494095	B3GALT4/B3GNT8/B4GALT1/FURIN/LOC100152566/MAN1A2/PGAP3/SREBF1/TPST2/UGCG	10	CC
GO:0030658	transport vesicle membrane	5/191	47/7848	0.00542648	0.00542648	0.0494095	ATP2B1/CPE/DMBT1/SCAMP1/SREBF1	5	CC
GO:0055037	recycling endosome	5/191	50/7848	0.00706933	0.00706933	0.061303	GPER1/SCAMP1/SCAMP2/SCAMP4/ZFYVE27	5	CC
GO:0010008	endosome membrane	8/191	117/7848	0.00756534	0.00756534	0.0626222	CDIP1/SCAMP1/SCAMP2/SCAMP4/SPPL2B/STARD3/TMEM184A/ZFYVE27	8	CC
GO:0005923	bicellular tight junction	5/191	53/7848	0.00903159	0.00903159	0.0715087	AOC1/CLDN2/CLDN4/JAML/OCEL1	5	CC
GO:0016323	basolateral plasma membrane	5/191	54/7848	0.0097615	0.0097615	0.0740675	AQP7/ATP2B1/B4GALT1/SCARB1/SLC40A1	5	CC
GO:0070160	tight junction	5/191	56/7848	0.011341	0.011341	0.0826105	AOC1/CLDN2/CLDN4/JAML/OCEL1	5	CC
GO:0043296	apical junction complex	5/191	59/7848	0.0140237	0.0140237	0.0982228	AOC1/CLDN2/CLDN4/JAML/OCEL1	5	CC
GO:0009925	basal plasma membrane	5/191	61/7848	0.0160315	0.0160315	0.108126	AQP7/ATP2B1/B4GALT1/SCARB1/SLC40A1	5	CC
GO:0045178	basal part of cell	5/191	65/7848	0.0206024	0.0206024	0.133993	AQP7/ATP2B1/B4GALT1/SCARB1/SLC40A1	5	CC
GO:0032580	Golgi cisterna membrane	3/191	26/7848	0.0244498	0.0244498	0.153532	B4GALT1/LOC100513844/TMEM115	3	CC
GO:0005911	cell-cell junction	8/191	146/7848	0.0258813	0.0258813	0.157104	AOC1/B4GALT1/CD99L2/CLDN2/CLDN4/GJB1/JAML/OCEL1	8	CC
GO:0019867	outer membrane	5/191	71/7848	0.0289305	0.0289305	0.164638	BAK1/IL4I1/MTX3/RETSAT/SIGMAR1	5	CC
GO:0031968	organelle outer membrane	5/191	71/7848	0.0289305	0.0289305	0.164638	BAK1/IL4I1/MTX3/RETSAT/SIGMAR1	5	CC
GO:0005802	trans-Golgi network	5/191	72/7848	0.0304978	0.0304978	0.168297	FURIN/GPER1/SCAMP1/SCAMP2/SCAMP4	5	CC
GO:0034364	high-density lipoprotein particle	2/191	12/7848	0.0331272	0.0331272	0.177431	APOA1/APOC3	2	CC
GO:0005768	endosome	12/191	273/7848	0.0342468	0.0342468	0.178186	CDIP1/GPER1/MFSD12/RNF128/SCAMP1/SCAMP2/SCAMP4/SFTPD/SPPL2B/STARD3/TMEM184A/ZFYVE27	12	CC
GO:0005770	late endosome	5/191	77/7848	0.0391291	0.0391291	0.197934	CDIP1/MFSD12/RNF128/SFTPD/STARD3	5	CC
GO:0030133	transport vesicle	6/191	109/7848	0.0495406	0.0495406	0.243827	ATP2B1/CPE/DMBT1/FURIN/SCAMP1/SREBF1	6	CC
GO:0022857	transmembrane transporter activity	34/153	489/7135	4.95637e-10	4.95637e-10	1.31474e-07	ANKH/AQP7/AQP8/ATP2B1/ATP6V0A1/CYBRD1/GJB1/KCNG1/KCNJ13/KCNK5/LRRC8A/MFSD12/MFSD2A/MFSD5/SIDT2/SLC11A2/SLC16A1/SLC16A9/SLC19A3/SLC23A2/SLC29A3/SLC2A6/SLC2A8/SLC30A10/SLC35F6/SLC37A2/SLC39A5/SLC40A1/SLC52A2/SLC5A10/SLC5A4/SLC6A8/TMEM37/TMEM63B	34	MF
GO:0015075	ion transmembrane transporter activity	25/153	351/7135	8.8335e-08	8.8335e-08	1.1716e-05	ANKH/ATP2B1/ATP6V0A1/KCNG1/KCNJ13/KCNK5/LRRC8A/MFSD12/MFSD2A/MFSD5/SLC11A2/SLC16A1/SLC16A9/SLC19A3/SLC23A2/SLC2A8/SLC30A10/SLC37A2/SLC39A5/SLC40A1/SLC52A2/SLC5A4/SLC6A8/TMEM37/TMEM63B	25	MF
GO:0008514	organic anion transmembrane transporter activity	9/153	56/7135	2.42734e-06	2.42734e-06	0.000214628	LRRC8A/MFSD12/MFSD2A/SLC16A1/SLC16A9/SLC23A2/SLC2A8/SLC52A2/SLC6A8	9	MF
GO:0008509	anion transmembrane transporter activity	12/153	111/7135	3.89077e-06	3.89077e-06	0.000258019	ANKH/LRRC8A/MFSD12/MFSD2A/MFSD5/SLC16A1/SLC16A9/SLC23A2/SLC2A8/SLC37A2/SLC52A2/SLC6A8	12	MF
GO:0008324	cation transmembrane transporter activity	18/153	267/7135	1.43943e-05	1.43943e-05	0.000763657	ATP2B1/ATP6V0A1/KCNG1/KCNJ13/KCNK5/MFSD12/MFSD2A/SLC11A2/SLC16A9/SLC19A3/SLC23A2/SLC30A10/SLC39A5/SLC40A1/SLC5A4/SLC6A8/TMEM37/TMEM63B	18	MF
GO:0015318	inorganic molecular entity transmembrane transporter activity	19/153	307/7135	2.74678e-05	2.74678e-05	0.00121437	ANKH/AQP7/ATP2B1/ATP6V0A1/KCNG1/KCNJ13/KCNK5/LRRC8A/MFSD2A/MFSD5/SLC11A2/SLC23A2/SLC37A2/SLC39A5/SLC40A1/SLC5A4/SLC6A8/TMEM37/TMEM63B	19	MF
GO:0090482	vitamin transmembrane transporter activity	4/153	11/7135	5.96695e-05	5.96695e-05	0.00226116	SLC19A3/SLC23A2/SLC2A8/SLC52A2	4	MF
GO:0046873	metal ion transmembrane transporter activity	12/153	164/7135	0.000194351	0.000194351	0.00644426	ATP2B1/KCNG1/KCNJ13/KCNK5/MFSD2A/SLC11A2/SLC23A2/SLC39A5/SLC40A1/SLC5A4/SLC6A8/TMEM37	12	MF
GO:0015144	carbohydrate transmembrane transporter activity	4/153	16/7135	0.000302626	0.000302626	0.0089195	AQP7/SLC23A2/SLC2A8/SLC5A4	4	MF
GO:0022890	inorganic cation transmembrane transporter activity	14/153	239/7135	0.000579648	0.000579648	0.0153759	ATP2B1/ATP6V0A1/KCNG1/KCNJ13/KCNK5/MFSD2A/SLC11A2/SLC23A2/SLC39A5/SLC40A1/SLC5A4/SLC6A8/TMEM37/TMEM63B	14	MF
GO:1901505	carbohydrate derivative transmembrane transporter activity	4/153	24/7135	0.00154596	0.00154596	0.0372807	LRRC8A/MFSD2A/SLC29A3/SLC37A2	4	MF
GO:0016758	hexosyltransferase activity	7/153	86/7135	0.00236812	0.00236812	0.0460238	B3GALT4/B3GNT8/B4GALT1/LOC100152566/LOC100513844/PIGV/UGCG	7	MF
GO:0008374	O-acyltransferase activity	4/153	27/7135	0.00242903	0.00242903	0.0460238	GPAT3/LRAT/MBOAT7/MOGAT2	4	MF
GO:0015370	solute:sodium symporter activity	4/153	27/7135	0.00242903	0.00242903	0.0460238	MFSD2A/SLC23A2/SLC5A4/SLC6A8	4	MF
GO:0016491	oxidoreductase activity	17/153	382/7135	0.00323295	0.00323295	0.0571722	ADH4/AOC1/BCO1/CYBRD1/CYP1A1/CYP2C42/CYP3A29/CYP3A46/FRRS1/GPD1/GSTK1/IL4I1/IYD/MSRB1/OGFOD3/POR/RETSAT	17	MF
GO:0015605	organophosphate ester transmembrane transporter activity	3/153	16/7135	0.00441024	0.00441024	0.0659447	LRRC8A/MFSD2A/SLC37A2	3	MF
GO:0016712	oxidoreductase activity, acting on paired donors, with incorporation or reduction of molecular oxygen, reduced flavin or flavoprotein as one donor, and incorporation of one atom of oxygen	3/153	16/7135	0.00441024	0.00441024	0.0659447	CYP1A1/CYP3A29/CYP3A46	3	MF
GO:0015293	symporter activity	5/153	51/7135	0.00450826	0.00450826	0.0659447	MFSD12/MFSD2A/SLC23A2/SLC5A4/SLC6A8	5	MF
GO:0046943	carboxylic acid transmembrane transporter activity	5/153	52/7135	0.0049033	0.0049033	0.0659447	MFSD12/MFSD2A/SLC16A1/SLC16A9/SLC23A2	5	MF
GO:0004180	carboxypeptidase activity	3/153	17/7135	0.00527189	0.00527189	0.0659447	CPE/CTSZ/FOLH1B	3	MF
GO:0005342	organic acid transmembrane transporter activity	5/153	53/7135	0.00532232	0.00532232	0.0659447	MFSD12/MFSD2A/SLC16A1/SLC16A9/SLC23A2	5	MF
GO:0022804	active transmembrane transporter activity	9/153	153/7135	0.00546922	0.00546922	0.0659447	ATP2B1/ATP6V0A1/CYBRD1/MFSD12/MFSD2A/SLC23A2/SLC37A2/SLC5A4/SLC6A8	9	MF
GO:0022853	active ion transmembrane transporter activity	7/153	103/7135	0.00645881	0.00645881	0.0744906	ATP2B1/ATP6V0A1/MFSD2A/SLC23A2/SLC37A2/SLC5A4/SLC6A8	7	MF
GO:0016757	glycosyltransferase activity	8/153	131/7135	0.00696345	0.00696345	0.0769644	B3GALT4/B3GNT8/B4GALT1/LOC100152566/LOC100513844/PIGV/ST6GALNAC4/UGCG	8	MF
GO:0015294	solute:cation symporter activity	4/153	38/7135	0.00851552	0.00851552	0.0903542	MFSD2A/SLC23A2/SLC5A4/SLC6A8	4	MF
GO:0008194	UDP-glycosyltransferase activity	5/153	61/7135	0.00962667	0.00962667	0.0951543	B3GALT4/B3GNT8/B4GALT1/LOC100152566/UGCG	5	MF
GO:0015932	nucleobase-containing compound transmembrane transporter activity	3/153	21/7135	0.00968535	0.00968535	0.0951543	LRRC8A/SIDT2/SLC29A3	3	MF
GO:0008028	monocarboxylic acid transmembrane transporter activity	3/153	22/7135	0.0110409	0.0110409	0.104598	MFSD2A/SLC16A1/SLC16A9	3	MF
GO:0005496	steroid binding	4/153	42/7135	0.0120894	0.0120894	0.110582	GPER1/S100G/STARD3/VDR	4	MF
GO:0015291	secondary active transmembrane transporter activity	6/153	90/7135	0.0125122	0.0125122	0.110634	MFSD12/MFSD2A/SLC23A2/SLC37A2/SLC5A4/SLC6A8	6	MF
GO:0004497	monooxygenase activity	5/153	66/7135	0.0132833	0.0132833	0.113664	BCO1/CYP1A1/CYP2C42/CYP3A29/CYP3A46	5	MF
GO:0016746	acyltransferase activity	7/153	122/7135	0.0156154	0.0156154	0.129443	ELOVL1/GGT1/GPAT3/LPGAT1/LRAT/MBOAT7/MOGAT2	7	MF
GO:0004181	metallocarboxypeptidase activity	2/153	10/7135	0.0183626	0.0183626	0.143262	CPE/FOLH1B	2	MF
GO:0010181	FMN binding	2/153	10/7135	0.0183626	0.0183626	0.143262	IYD/POR	2	MF
GO:0004175	endopeptidase activity	9/153	188/7135	0.0194666	0.0194666	0.147536	BACE2/CASP10/CTSZ/DMBT1/F10/FURIN/PRSS8/SPPL2B/TLL2	9	MF
GO:0001618	virus receptor activity	2/153	11/7135	0.0221307	0.0221307	0.149934	HYAL2/SLC52A2	2	MF
GO:0016641	oxidoreductase activity, acting on the CH-NH2 group of donors, oxygen as acceptor	2/153	11/7135	0.0221307	0.0221307	0.149934	AOC1/IL4I1	2	MF
GO:0140272	exogenous protein binding	2/153	11/7135	0.0221307	0.0221307	0.149934	HYAL2/SLC52A2	2	MF
GO:0015081	sodium ion transmembrane transporter activity	4/153	51/7135	0.0232897	0.0232897	0.149934	MFSD2A/SLC23A2/SLC5A4/SLC6A8	4	MF
GO:0015267	channel activity	9/153	194/7135	0.0233371	0.0233371	0.149934	AQP7/AQP8/GJB1/KCNG1/KCNJ13/KCNK5/LRRC8A/TMEM37/TMEM63B	9	MF
GO:0022803	passive transmembrane transporter activity	9/153	194/7135	0.0233371	0.0233371	0.149934	AQP7/AQP8/GJB1/KCNG1/KCNJ13/KCNK5/LRRC8A/TMEM37/TMEM63B	9	MF
GO:0008233	peptidase activity	12/153	294/7135	0.0237395	0.0237395	0.149934	BACE2/CASP10/CPE/CTSZ/DMBT1/F10/FOLH1B/FURIN/GGT1/PRSS8/SPPL2B/TLL2	12	MF
GO:0038024	cargo receptor activity	3/153	30/7135	0.0257055	0.0257055	0.151015	DMBT1/SCARB1/TEX261	3	MF
GO:0003707	nuclear steroid receptor activity	2/153	12/7135	0.0261878	0.0261878	0.151015	ABHD2/GPER1	2	MF
GO:0016638	oxidoreductase activity, acting on the CH-NH2 group of donors	2/153	12/7135	0.0261878	0.0261878	0.151015	AOC1/IL4I1	2	MF
GO:0050431	transforming growth factor beta binding	2/153	12/7135	0.0261878	0.0261878	0.151015	HYAL2/TSKU	2	MF
GO:0035250	UDP-galactosyltransferase activity	2/153	13/7135	0.03052	0.03052	0.172252	B3GALT4/B4GALT1	2	MF
GO:0005179	hormone activity	5/153	83/7135	0.032383	0.032383	0.178959	CCK/EDN3/GIP/MLN/SCT	5	MF
GO:0005506	iron ion binding	5/153	84/7135	0.0338587	0.0338587	0.181698	CYP1A1/CYP2C42/CYP3A29/CYP3A46/OGFOD3	5	MF
GO:0015101	organic cation transmembrane transporter activity	2/153	14/7135	0.0351136	0.0351136	0.181698	SLC16A9/SLC19A3	2	MF
GO:0120013	lipid transfer activity	2/153	14/7135	0.0351136	0.0351136	0.181698	GLTPD2/STARD3	2	MF
GO:0042562	hormone binding	3/153	34/7135	0.0356187	0.0356187	0.181698	ABHD2/GPER1/SLC40A1	3	MF
GO:0004190	aspartic-type endopeptidase activity	2/153	16/7135	0.0450336	0.0450336	0.217196	BACE2/SPPL2B	2	MF
GO:0008378	galactosyltransferase activity	2/153	16/7135	0.0450336	0.0450336	0.217196	B3GALT4/B4GALT1	2	MF
GO:0070001	aspartic-type peptidase activity	2/153	16/7135	0.0450336	0.0450336	0.217196	BACE2/SPPL2B	2	MF
GO:0016705	oxidoreductase activity, acting on paired donors, with incorporation or reduction of molecular oxygen	5/153	92/7135	0.047167	0.047167	0.222534	CYP1A1/CYP2C42/CYP3A29/CYP3A46/OGFOD3	5	MF
GO:0015103	inorganic anion transmembrane transporter activity	4/153	64/7135	0.0479379	0.0479379	0.222534	ANKH/LRRC8A/MFSD5/SLC37A2	4	MF
GO:0005509	calcium ion binding	10/153	257/7135	0.0491126	0.0491126	0.222534	AOC1/CDH1/F10/MAN1A2/NUCB1/PADI2/RGN/S100G/STIM1/TLL2	10	MF

## Sheet: Down-regulated genes enriched
ID	Description	GeneRatio	BgRatio	pvalue	p.adjust	qvalue	geneID	Count	Ont
GO:0019730	antimicrobial humoral response	4/45	39/6899	0.000109996	0.000109996	0.0603227	CXCL10/CXCL9/SLPI/SPAI-2	4	BP
GO:0045087	innate immune response	8/45	238/6899	0.000127207	0.000127207	0.0603227	CCL8/CXCL10/DUSP10/GP91-PHOX/SLPI/SPAI-2/STAT1/TIFA	8	BP
GO:0070098	chemokine-mediated signaling pathway	3/45	21/6899	0.000317749	0.000317749	0.0753963	CCL8/CXCL10/CXCL9	3	BP
GO:0098542	defense response to other organism	9/45	360/6899	0.000431643	0.000431643	0.0753963	CCL8/CXCL10/CXCL9/DUSP10/GP91-PHOX/SLPI/SPAI-2/STAT1/TIFA	9	BP
GO:1990868	response to chemokine	3/45	24/6899	0.00047698	0.00047698	0.0753963	CCL8/CXCL10/CXCL9	3	BP
GO:1990869	cellular response to chemokine	3/45	24/6899	0.00047698	0.00047698	0.0753963	CCL8/CXCL10/CXCL9	3	BP
GO:0051928	positive regulation of calcium ion transport	3/45	27/6899	0.000679949	0.000679949	0.0921254	CXCL10/CXCL9/GCG	3	BP
GO:2001251	negative regulation of chromosome organization	3/45	30/6899	0.00093098	0.00093098	0.108125	CDK3/MAD2L1/TOP2A	3	BP
GO:0030593	neutrophil chemotaxis	3/45	31/6899	0.00102604	0.00102604	0.108125	CCL8/CXCL10/CXCL9	3	BP
GO:0032496	response to lipopolysaccharide	4/45	75/6899	0.00137012	0.00137012	0.115259	CXCL10/CXCL9/DUSP10/SLPI	4	BP
GO:1990266	neutrophil migration	3/45	35/6899	0.00146703	0.00146703	0.115259	CCL8/CXCL10/CXCL9	3	BP
GO:0051707	response to other organism	9/45	431/6899	0.00157173	0.00157173	0.115259	CCL8/CXCL10/CXCL9/DUSP10/GP91-PHOX/SLPI/SPAI-2/STAT1/TIFA	9	BP
GO:0043207	response to external biotic stimulus	9/45	432/6899	0.00159738	0.00159738	0.115259	CCL8/CXCL10/CXCL9/DUSP10/GP91-PHOX/SLPI/SPAI-2/STAT1/TIFA	9	BP
GO:0071621	granulocyte chemotaxis	3/45	37/6899	0.00172584	0.00172584	0.115259	CCL8/CXCL10/CXCL9	3	BP
GO:0002237	response to molecule of bacterial origin	4/45	81/6899	0.00182291	0.00182291	0.115259	CXCL10/CXCL9/DUSP10/SLPI	4	BP
GO:0009607	response to biotic stimulus	9/45	446/6899	0.00199364	0.00199364	0.118176	CCL8/CXCL10/CXCL9/DUSP10/GP91-PHOX/SLPI/SPAI-2/STAT1/TIFA	9	BP
GO:0097530	granulocyte migration	3/45	41/6899	0.00232508	0.00232508	0.129715	CCL8/CXCL10/CXCL9	3	BP
GO:0044419	biological process involved in interspecies interaction between organisms	9/45	467/6899	0.00273324	0.00273324	0.135599	CCL8/CXCL10/CXCL9/DUSP10/GP91-PHOX/SLPI/SPAI-2/STAT1/TIFA	9	BP
GO:0007188	adenylate cyclase-modulating G protein-coupled receptor signaling pathway	4/45	91/6899	0.00279299	0.00279299	0.135599	CXCL10/CXCL9/GCG/GNA14	4	BP
GO:1901700	response to oxygen-containing compound	8/45	381/6899	0.00285947	0.00285947	0.135599	CXCL10/CXCL9/DUSP10/GCG/GNA14/LPL/SLPI/STAT1	8	BP
GO:1901739	regulation of myoblast fusion	2/45	14/6899	0.00360197	0.00360197	0.154058	CXCL10/CXCL9	2	BP
GO:0043270	positive regulation of ion transport	3/45	50/6899	0.00410386	0.00410386	0.154058	CXCL10/CXCL9/GCG	3	BP
GO:0019731	antibacterial humoral response	2/45	15/6899	0.00413894	0.00413894	0.154058	SLPI/SPAI-2	2	BP
GO:0090183	regulation of kidney development	2/45	15/6899	0.00413894	0.00413894	0.154058	STAT1/WNT2B	2	BP
GO:0006816	calcium ion transport	4/45	104/6899	0.00451873	0.00451873	0.154058	CCL8/CXCL10/CXCL9/GCG	4	BP
GO:0006959	humoral immune response	4/45	105/6899	0.00467555	0.00467555	0.154058	CXCL10/CXCL9/SLPI/SPAI-2	4	BP
GO:0006120	mitochondrial electron transport, NADH to ubiquinone	2/45	16/6899	0.00471066	0.00471066	0.154058	ND1/ND2	2	BP
GO:0051281	positive regulation of release of sequestered calcium ion into cytosol	2/45	16/6899	0.00471066	0.00471066	0.154058	CXCL10/CXCL9	2	BP
GO:0060142	regulation of syncytium formation by plasma membrane fusion	2/45	16/6899	0.00471066	0.00471066	0.154058	CXCL10/CXCL9	2	BP
GO:0002548	monocyte chemotaxis	2/45	17/6899	0.00531669	0.00531669	0.163092	CCL8/CXCL10	2	BP
GO:0009617	response to bacterium	5/45	175/6899	0.00533081	0.00533081	0.163092	CXCL10/CXCL9/DUSP10/SLPI/SPAI-2	5	BP
GO:0006954	inflammatory response	6/45	255/6899	0.00583485	0.00583485	0.172934	CCL8/CD200/CXCL10/CXCL9/DUSP10/GP91-PHOX	6	BP
GO:0010639	negative regulation of organelle organization	4/45	118/6899	0.00705909	0.00705909	0.19327	CDK3/CHEK1/MAD2L1/TOP2A	4	BP
GO:0097529	myeloid leukocyte migration	3/45	61/6899	0.0071693	0.0071693	0.19327	CCL8/CXCL10/CXCL9	3	BP
GO:0007520	myoblast fusion	2/45	20/6899	0.0073361	0.0073361	0.19327	CXCL10/CXCL9	2	BP
GO:0045839	negative regulation of mitotic nuclear division	2/45	20/6899	0.0073361	0.0073361	0.19327	CHEK1/MAD2L1	2	BP
GO:1904427	positive regulation of calcium ion transmembrane transport	2/45	21/6899	0.00807488	0.00807488	0.194694	CXCL10/CXCL9	2	BP
GO:0016311	dephosphorylation	4/45	123/6899	0.00815677	0.00815677	0.194694	CDKN3/DUSP10/PLPP1/PTPN13	4	BP
GO:0007189	adenylate cyclase-activating G protein-coupled receptor signaling pathway	3/45	65/6899	0.00854517	0.00854517	0.194694	CXCL10/CXCL9/GCG	3	BP
GO:0051924	regulation of calcium ion transport	3/45	65/6899	0.00854517	0.00854517	0.194694	CXCL10/CXCL9/GCG	3	BP
GO:0097194	execution phase of apoptosis	2/45	22/6899	0.00884574	0.00884574	0.194694	GCG/TOP2A	2	BP
GO:0033044	regulation of chromosome organization	3/45	66/6899	0.00891171	0.00891171	0.194694	CDK3/MAD2L1/TOP2A	3	BP
GO:0051129	negative regulation of cellular component organization	5/45	199/6899	0.00909292	0.00909292	0.194694	CDK3/CHEK1/CXCL10/MAD2L1/TOP2A	5	BP
GO:0000768	syncytium formation by plasma membrane fusion	2/45	23/6899	0.00964826	0.00964826	0.194694	CXCL10/CXCL9	2	BP
GO:0006949	syncytium formation	2/45	23/6899	0.00964826	0.00964826	0.194694	CXCL10/CXCL9	2	BP
GO:0048247	lymphocyte chemotaxis	2/45	23/6899	0.00964826	0.00964826	0.194694	CCL8/CXCL10	2	BP
GO:0140253	cell-cell fusion	2/45	23/6899	0.00964826	0.00964826	0.194694	CXCL10/CXCL9	2	BP
GO:0051279	regulation of release of sequestered calcium ion into cytosol	2/45	24/6899	0.010482	0.010482	0.202885	CXCL10/CXCL9	2	BP
GO:0061844	antimicrobial humoral immune response mediated by antimicrobial peptide	2/45	24/6899	0.010482	0.010482	0.202885	CXCL10/CXCL9	2	BP
GO:0010257	NADH dehydrogenase complex assembly	2/45	25/6899	0.0113466	0.0113466	0.206949	ND1/ND2	2	BP
GO:0032981	mitochondrial respiratory chain complex I assembly	2/45	25/6899	0.0113466	0.0113466	0.206949	ND1/ND2	2	BP
GO:0045661	regulation of myoblast differentiation	2/45	25/6899	0.0113466	0.0113466	0.206949	CXCL10/CXCL9	2	BP
GO:0030595	leukocyte chemotaxis	3/45	73/6899	0.0117357	0.0117357	0.210007	CCL8/CXCL10/CXCL9	3	BP
GO:0051784	negative regulation of nuclear division	2/45	26/6899	0.0122415	0.0122415	0.215002	CHEK1/MAD2L1	2	BP
GO:0016525	negative regulation of angiogenesis	2/45	27/6899	0.0131665	0.0131665	0.222988	CXCL10/STAT1	2	BP
GO:2000181	negative regulation of blood vessel morphogenesis	2/45	27/6899	0.0131665	0.0131665	0.222988	CXCL10/STAT1	2	BP
GO:0071496	cellular response to external stimulus	3/45	78/6899	0.0140346	0.0140346	0.22321	CHEK1/PLIN2/WNT2B	3	BP
GO:0001656	metanephros development	2/45	28/6899	0.0141209	0.0141209	0.22321	OSR2/STAT1	2	BP
GO:0051304	chromosome separation	2/45	28/6899	0.0141209	0.0141209	0.22321	MAD2L1/TOP2A	2	BP
GO:1901343	negative regulation of vasculature development	2/45	28/6899	0.0141209	0.0141209	0.22321	CXCL10/STAT1	2	BP
GO:0001508	action potential	2/45	29/6899	0.0151046	0.0151046	0.231057	GNA14/USP53	2	BP
GO:0071346	cellular response to interferon-gamma	2/45	29/6899	0.0151046	0.0151046	0.231057	CCL8/STAT1	2	BP
GO:1904064	positive regulation of cation transmembrane transport	2/45	30/6899	0.016117	0.016117	0.240422	CXCL10/CXCL9	2	BP
GO:0072080	nephron tubule development	2/45	31/6899	0.0171578	0.0171578	0.240422	STAT1/WNT2B	2	BP
GO:0034341	response to interferon-gamma	2/45	32/6899	0.0182265	0.0182265	0.240422	CCL8/STAT1	2	BP
GO:0034767	positive regulation of ion transmembrane transport	2/45	32/6899	0.0182265	0.0182265	0.240422	CXCL10/CXCL9	2	BP
GO:0061326	renal tubule development	2/45	32/6899	0.0182265	0.0182265	0.240422	STAT1/WNT2B	2	BP
GO:0019221	cytokine-mediated signaling pathway	4/45	156/6899	0.0182616	0.0182616	0.240422	CCL8/CXCL10/CXCL9/STAT1	4	BP
GO:0001822	kidney development	3/45	87/6899	0.0187775	0.0187775	0.240422	OSR2/STAT1/WNT2B	3	BP
GO:0006470	protein dephosphorylation	3/45	87/6899	0.0187775	0.0187775	0.240422	CDKN3/DUSP10/PTPN13	3	BP
GO:0006874	cellular calcium ion homeostasis	3/45	87/6899	0.0187775	0.0187775	0.240422	CCL8/CXCL10/CXCL9	3	BP
GO:0015908	fatty acid transport	2/45	33/6899	0.0193227	0.0193227	0.240422	FABP6/PLIN2	2	BP
GO:0019079	viral genome replication	2/45	33/6899	0.0193227	0.0193227	0.240422	CCL8/TOP2A	2	BP
GO:0051209	release of sequestered calcium ion into cytosol	2/45	33/6899	0.0193227	0.0193227	0.240422	CXCL10/CXCL9	2	BP
GO:0051282	regulation of sequestering of calcium ion	2/45	33/6899	0.0193227	0.0193227	0.240422	CXCL10/CXCL9	2	BP
GO:0051283	negative regulation of sequestering of calcium ion	2/45	33/6899	0.0193227	0.0193227	0.240422	CXCL10/CXCL9	2	BP
GO:0072001	renal system development	3/45	89/6899	0.0199383	0.0199383	0.240422	OSR2/STAT1/WNT2B	3	BP
GO:0007088	regulation of mitotic nuclear division	2/45	34/6899	0.0204462	0.0204462	0.240422	CHEK1/MAD2L1	2	BP
GO:0051208	sequestering of calcium ion	2/45	34/6899	0.0204462	0.0204462	0.240422	CXCL10/CXCL9	2	BP
GO:1905330	regulation of morphogenesis of an epithelium	2/45	34/6899	0.0204462	0.0204462	0.240422	CXCL10/WNT2B	2	BP
GO:0055074	calcium ion homeostasis	3/45	90/6899	0.0205333	0.0205333	0.240422	CCL8/CXCL10/CXCL9	3	BP
GO:0001823	mesonephros development	2/45	35/6899	0.0215965	0.0215965	0.245603	OSR2/WNT2B	2	BP
GO:0072009	nephron epithelium development	2/45	35/6899	0.0215965	0.0215965	0.245603	STAT1/WNT2B	2	BP
GO:0051235	maintenance of location	3/45	92/6899	0.0217526	0.0217526	0.245603	CXCL10/CXCL9/PLIN2	3	BP
GO:0031667	response to nutrient levels	3/45	94/6899	0.0230111	0.0230111	0.249002	PLIN2/STAT1/WNT2B	3	BP
GO:0070372	regulation of ERK1 and ERK2 cascade	3/45	94/6899	0.0230111	0.0230111	0.249002	CCL8/DUSP10/GCG	3	BP
GO:0045445	myoblast differentiation	2/45	37/6899	0.0239758	0.0239758	0.249002	CXCL10/CXCL9	2	BP
GO:0043269	regulation of ion transport	4/45	171/6899	0.0246581	0.0246581	0.249002	CXCL10/CXCL9/GCG/GP91-PHOX	4	BP
GO:0006310	DNA recombination	3/45	97/6899	0.0249722	0.0249722	0.249002	CHEK1/EXO1/TOP2A	3	BP
GO:0002062	chondrocyte differentiation	2/45	38/6899	0.0252042	0.0252042	0.249002	OSR2/WNT2B	2	BP
GO:0009612	response to mechanical stimulus	2/45	38/6899	0.0252042	0.0252042	0.249002	CHEK1/USP53	2	BP
GO:0009746	response to hexose	2/45	38/6899	0.0252042	0.0252042	0.249002	GCG/LPL	2	BP
GO:0009749	response to glucose	2/45	38/6899	0.0252042	0.0252042	0.249002	GCG/LPL	2	BP
GO:0034284	response to monosaccharide	2/45	38/6899	0.0252042	0.0252042	0.249002	GCG/LPL	2	BP
GO:0042476	odontogenesis	2/45	38/6899	0.0252042	0.0252042	0.249002	OSR2/PHEX	2	BP
GO:0072006	nephron development	2/45	38/6899	0.0252042	0.0252042	0.249002	STAT1/WNT2B	2	BP
GO:0072503	cellular divalent inorganic cation homeostasis	3/45	99/6899	0.0263285	0.0263285	0.250532	CCL8/CXCL10/CXCL9	3	BP
GO:0072676	lymphocyte migration	2/45	39/6899	0.0264578	0.0264578	0.250532	CCL8/CXCL10	2	BP
GO:0010959	regulation of metal ion transport	3/45	100/6899	0.0270213	0.0270213	0.250532	CXCL10/CXCL9/GCG	3	BP
GO:0001655	urogenital system development	3/45	101/6899	0.0277239	0.0277239	0.250532	OSR2/STAT1/WNT2B	3	BP
GO:0070371	ERK1 and ERK2 cascade	3/45	101/6899	0.0277239	0.0277239	0.250532	CCL8/DUSP10/GCG	3	BP
GO:0009743	response to carbohydrate	2/45	40/6899	0.0277364	0.0277364	0.250532	GCG/LPL	2	BP
GO:0019646	aerobic electron transport chain	2/45	40/6899	0.0277364	0.0277364	0.250532	ND1/ND2	2	BP
GO:0033108	mitochondrial respiratory chain complex assembly	2/45	40/6899	0.0277364	0.0277364	0.250532	ND1/ND2	2	BP
GO:0072089	stem cell proliferation	2/45	40/6899	0.0277364	0.0277364	0.250532	OSR2/WNT2B	2	BP
GO:0009991	response to extracellular stimulus	3/45	102/6899	0.0284363	0.0284363	0.25443	PLIN2/STAT1/WNT2B	3	BP
GO:1903169	regulation of calcium ion transmembrane transport	2/45	41/6899	0.0290396	0.0290396	0.2574	CXCL10/CXCL9	2	BP
GO:0072507	divalent inorganic cation homeostasis	3/45	104/6899	0.0298903	0.0298903	0.259465	CCL8/CXCL10/CXCL9	3	BP
GO:0007093	mitotic cell cycle checkpoint signaling	2/45	42/6899	0.0303669	0.0303669	0.259465	CHEK1/MAD2L1	2	BP
GO:0014902	myotube differentiation	2/45	42/6899	0.0303669	0.0303669	0.259465	CXCL10/CXCL9	2	BP
GO:0097553	calcium ion transmembrane import into cytosol	2/45	42/6899	0.0303669	0.0303669	0.259465	CXCL10/CXCL9	2	BP
GO:0030282	bone mineralization	2/45	43/6899	0.0317181	0.0317181	0.261584	OSR2/PHEX	2	BP
GO:0042775	mitochondrial ATP synthesis coupled electron transport	2/45	43/6899	0.0317181	0.0317181	0.261584	ND1/ND2	2	BP
GO:0048706	embryonic skeletal system development	2/45	43/6899	0.0317181	0.0317181	0.261584	HOXC6/OSR2	2	BP
GO:0050728	negative regulation of inflammatory response	2/45	43/6899	0.0317181	0.0317181	0.261584	CD200/DUSP10	2	BP
GO:0050900	leukocyte migration	3/45	107/6899	0.0321443	0.0321443	0.262813	CCL8/CXCL10/CXCL9	3	BP
GO:0033993	response to lipid	4/45	187/6899	0.0328205	0.0328205	0.266048	CXCL10/CXCL9/DUSP10/SLPI	4	BP
GO:0072073	kidney epithelium development	2/45	45/6899	0.0344907	0.0344907	0.277217	STAT1/WNT2B	2	BP
GO:0060326	cell chemotaxis	3/45	111/6899	0.0352853	0.0352853	0.280249	CCL8/CXCL10/CXCL9	3	BP
GO:0009267	cellular response to starvation	2/45	46/6899	0.0359113	0.0359113	0.280249	PLIN2/WNT2B	2	BP
GO:0019751	polyol metabolic process	2/45	46/6899	0.0359113	0.0359113	0.280249	NUDT4/PLPP1	2	BP
GO:0050678	regulation of epithelial cell proliferation	3/45	112/6899	0.0360947	0.0360947	0.280249	DUSP10/OSR2/STAT1	3	BP
GO:0007186	G protein-coupled receptor signaling pathway	5/45	284/6899	0.0363453	0.0363453	0.280249	CCL8/CXCL10/CXCL9/GCG/GNA14	5	BP
GO:0031056	regulation of histone modification	2/45	47/6899	0.0373544	0.0373544	0.281172	CHEK1/GCG	2	BP
GO:0042773	ATP synthesis coupled electron transport	2/45	47/6899	0.0373544	0.0373544	0.281172	ND1/ND2	2	BP
GO:0050680	negative regulation of epithelial cell proliferation	2/45	47/6899	0.0373544	0.0373544	0.281172	DUSP10/STAT1	2	BP
GO:0051783	regulation of nuclear division	2/45	48/6899	0.0388196	0.0388196	0.2899	CHEK1/MAD2L1	2	BP
GO:1901701	cellular response to oxygen-containing compound	5/45	292/6899	0.0402323	0.0402323	0.298103	CXCL10/CXCL9/GCG/GNA14/STAT1	5	BP
GO:0034764	positive regulation of transmembrane transport	2/45	50/6899	0.041815	0.041815	0.304281	CXCL10/CXCL9	2	BP
GO:1901991	negative regulation of mitotic cell cycle phase transition	2/45	50/6899	0.041815	0.041815	0.304281	CHEK1/MAD2L1	2	BP
GO:0034765	regulation of ion transmembrane transport	3/45	119/6899	0.0420286	0.0420286	0.304281	CXCL10/CXCL9/GP91-PHOX	3	BP
GO:0055082	cellular chemical homeostasis	4/45	205/6899	0.0437056	0.0437056	0.314025	CCL8/CXCL10/CXCL9/GCG	4	BP
GO:0046434	organophosphate catabolic process	2/45	52/6899	0.044895	0.044895	0.315342	NUDT4/PLPP1	2	BP
GO:0071674	mononuclear cell migration	2/45	52/6899	0.044895	0.044895	0.315342	CCL8/CXCL10	2	BP
GO:0042594	response to starvation	2/45	53/6899	0.0464658	0.0464658	0.315342	PLIN2/WNT2B	2	BP
GO:0051607	defense response to virus	3/45	124/6899	0.0465512	0.0465512	0.315342	CXCL10/CXCL9/STAT1	3	BP
GO:0140546	defense response to symbiont	3/45	124/6899	0.0465512	0.0465512	0.315342	CXCL10/CXCL9/STAT1	3	BP
GO:0006811	ion transport	6/45	409/6899	0.0480577	0.0480577	0.315342	CCL8/CXCL10/CXCL9/GCG/GP91-PHOX/SLC26A3	6	BP
GO:0022904	respiratory electron transport chain	2/45	55/6899	0.0496676	0.0496676	0.315342	ND1/ND2	2	BP
GO:0098687	chromosomal region	4/49	98/7848	0.0031507	0.0031507	0.293983	CDK3/CHEK1/MAD2L1/TOP2A	4	CC
GO:1990204	oxidoreductase complex	3/49	65/7848	0.0076166	0.0076166	0.293983	GP91-PHOX/ND1/ND2	3	CC
GO:0000793	condensed chromosome	3/49	73/7848	0.0104746	0.0104746	0.293983	CHEK1/MAD2L1/TOP2A	3	CC
GO:0005747	mitochondrial respiratory chain complex I	2/49	33/7848	0.0178266	0.0178266	0.293983	ND1/ND2	2	CC
GO:0030964	NADH dehydrogenase complex	2/49	33/7848	0.0178266	0.0178266	0.293983	ND1/ND2	2	CC
GO:0045271	respiratory chain complex I	2/49	33/7848	0.0178266	0.0178266	0.293983	ND1/ND2	2	CC
GO:0000781	chromosome, telomeric region	2/49	37/7848	0.0221336	0.0221336	0.312866	CDK3/CHEK1	2	CC
GO:0001664	G protein-coupled receptor binding	7/46	131/7135	1.76614e-05	1.76614e-05	0.00221232	CCL19/CCL8/CXCL10/CXCL9/GCG/GNA14/WNT2B	7	MF
GO:0008009	chemokine activity	4/46	33/7135	5.39762e-05	5.39762e-05	0.00338062	CCL19/CCL8/CXCL10/CXCL9	4	MF
GO:0042379	chemokine receptor binding	4/46	42/7135	0.000141516	0.000141516	0.00590891	CCL19/CCL8/CXCL10/CXCL9	4	MF
GO:0016651	oxidoreductase activity, acting on NAD(P)H	3/46	26/7135	0.000587792	0.000587792	0.0184072	GP91-PHOX/ND1/ND2	3	MF
GO:0003954	NADH dehydrogenase activity	2/46	12/7135	0.00257587	0.00257587	0.042036	ND1/ND2	2	MF
GO:0008137	NADH dehydrogenase (ubiquinone) activity	2/46	12/7135	0.00257587	0.00257587	0.042036	ND1/ND2	2	MF
GO:0050136	NADH dehydrogenase (quinone) activity	2/46	12/7135	0.00257587	0.00257587	0.042036	ND1/ND2	2	MF
GO:0005125	cytokine activity	5/46	154/7135	0.00294795	0.00294795	0.042036	CCL19/CCL8/CXCL10/CXCL9/WNT2B	5	MF
GO:0008237	metallopeptidase activity	4/46	94/7135	0.00302024	0.00302024	0.042036	CPO/MMP3/PHEX/XPNPEP2	4	MF
GO:0003955	NAD(P)H dehydrogenase (quinone) activity	2/46	14/7135	0.00352256	0.00352256	0.0441246	ND1/ND2	2	MF
GO:0016655	oxidoreductase activity, acting on NAD(P)H, quinone or similar compound as acceptor	2/46	16/7135	0.0046072	0.0046072	0.0524648	ND1/ND2	2	MF
GO:0016791	phosphatase activity	4/46	118/7135	0.00679324	0.00679324	0.0709119	CDKN3/DUSP10/PLPP1/PTPN13	4	MF
GO:0015453	oxidoreduction-driven active transmembrane transporter activity	2/46	21/7135	0.00789926	0.00789926	0.0761143	ND1/ND2	2	MF
GO:0004721	phosphoprotein phosphatase activity	3/46	66/7135	0.00864329	0.00864329	0.0763676	CDKN3/DUSP10/PTPN13	3	MF
GO:0048018	receptor ligand activity	6/46	287/7135	0.00971694	0.00971694	0.0763676	CCL19/CCL8/CXCL10/CXCL9/GCG/WNT2B	6	MF
GO:0008138	protein tyrosine/serine/threonine phosphatase activity	2/46	24/7135	0.0102554	0.0102554	0.0763676	CDKN3/DUSP10	2	MF
GO:0030546	signaling receptor activator activity	6/46	291/7135	0.0103642	0.0103642	0.0763676	CCL19/CCL8/CXCL10/CXCL9/GCG/WNT2B	6	MF
GO:0030545	signaling receptor regulator activity	6/46	300/7135	0.0119327	0.0119327	0.0822821	CCL19/CCL8/CXCL10/CXCL9/GCG/WNT2B	6	MF
GO:0016788	hydrolase activity, acting on ester bonds	6/46	309/7135	0.0136634	0.0136634	0.0822821	CDKN3/DUSP10/EXO1/LPL/PLPP1/PTPN13	6	MF
GO:0008235	metalloexopeptidase activity	2/46	28/7135	0.0138181	0.0138181	0.0822821	CPO/XPNPEP2	2	MF
GO:0017018	myosin phosphatase activity	2/46	28/7135	0.0138181	0.0138181	0.0822821	CDKN3/DUSP10	2	MF
GO:0009055	electron transfer activity	2/46	29/7135	0.0147812	0.0147812	0.0822821	ND1/ND2	2	MF
GO:0042578	phosphoric ester hydrolase activity	4/46	149/7135	0.0151081	0.0151081	0.0822821	CDKN3/DUSP10/PLPP1/PTPN13	4	MF
GO:0005126	cytokine receptor binding	4/46	158/7135	0.0183624	0.0183624	0.0958389	CCL19/CCL8/CXCL10/CXCL9	4	MF
GO:0004722	protein serine/threonine phosphatase activity	2/46	35/7135	0.0211396	0.0211396	0.105921	CDKN3/DUSP10	2	MF
GO:0004725	protein tyrosine phosphatase activity	2/46	37/7135	0.0234707	0.0234707	0.107753	CDKN3/PTPN13	2	MF
GO:0016462	pyrophosphatase activity	5/46	258/7135	0.0243392	0.0243392	0.107753	ARL10/GNA14/NUDT4/PLPP1/PPA1	5	MF
GO:0008022	protein C-terminus binding	2/46	38/7135	0.0246743	0.0246743	0.107753	MAD2L1/TOP2A	2	MF
GO:0016818	hydrolase activity, acting on acid anhydrides, in phosphorus-containing anhydrides	5/46	261/7135	0.0254343	0.0254343	0.107753	ARL10/GNA14/NUDT4/PLPP1/PPA1	5	MF
GO:0016817	hydrolase activity, acting on acid anhydrides	5/46	262/7135	0.0258063	0.0258063	0.107753	ARL10/GNA14/NUDT4/PLPP1/PPA1	5	MF
GO:0008238	exopeptidase activity	2/46	46/7135	0.0351684	0.0351684	0.142107	CPO/XPNPEP2	2	MF
GO:0004867	serine-type endopeptidase inhibitor activity	2/46	47/7135	0.0365832	0.0365832	0.143204	SLPI/SPAI-2	2	MF
GO:0008233	peptidase activity	5/46	294/7135	0.0396171	0.0396171	0.150381	CPO/MMP3/PHEX/USP53/XPNPEP2	5	MF
GO:0004222	metalloendopeptidase activity	2/46	52/7135	0.0439775	0.0439775	0.162022	MMP3/PHEX	2	MF
GO:0008201	heparin binding	2/46	53/7135	0.0455182	0.0455182	0.162907	CXCL10/LPL	2	MF
