# Supplementary material for: The Metabolic Pathway of Bile Secretion Is Vulnerable to Salmonella enterica Exposure in Porcine Intestinal Epithelial Cells
Source: Animals (Basel). 2024 Mar 3;14(5):789. doi: 10.3390/ani14050789 (PMC10931422; doi:10.3390/ani14050789)
Supplement: Supplementary file 1 [file animals-14-00789-s001.zip › Table S10. Signaling pathway associated with up- and down-regulated genes that the Salmonella enterica in-fection and LPS groups have in common.xlsx]

## Sheet: Up-regulated genes enriched
ID	Description	GeneRatio	BgRatio	pvalue	p.adjust	qvalue	geneID	Count
ssc04977	Vitamin digestion and absorption	9/161	25/9206	1.96698e-10	1.96698e-10	4.8657e-08	APOA1/FOLH1B/LRAT/SCARB1/SLC19A1/SLC19A3/SLC46A1/SLC52A3/SLC5A6	9
ssc04978	Mineral absorption	10/161	54/9206	2.49792e-08	2.49792e-08	3.08953e-06	ATP1B3/ATP2B1/CYBRD1/S100G/SLC11A2/SLC40A1/SLC46A1/SLC9A3/TRPV6/VDR	10
ssc04976	Bile secretion	10/161	85/9206	2.05119e-06	2.05119e-06	0.000135865	ABCC2/ABCC3/ADCY9/AQP8/ATP1B3/LOC100153359/SCARB1/SCT/SLC2A1/SLC9A3	10
ssc00830	Retinol metabolism	9/161	67/9206	2.19697e-06	2.19697e-06	0.000135865	ADH4/BCO1/CYP1A1/CYP2C42/CYP3A29/CYP3A46/LRAT/RDH5/RETSAT	9
ssc01523	Antifolate resistance	5/161	32/9206	0.000211293	0.000211293	0.0104534	ABCC2/ABCC3/LOC100153359/SLC19A1/SLC46A1	5
ssc04911	Insulin secretion	7/161	85/9206	0.00069088	0.00069088	0.0284837	ADCY9/ATP1B3/CCK/CREB3L3/GIP/PDX1/SLC2A1	7
ssc04514	Cell adhesion molecules	9/161	155/9206	0.00155994	0.00155994	0.0525645	CD6/CD99L2/CDH1/CLDN2/CLDN4/GLG1/ICOSLG/LOC100621559/VSIR	9
ssc04972	Pancreatic secretion	7/161	99/9206	0.00169996	0.00169996	0.0525645	ADCY9/ATP1B3/ATP2B1/BST1/CCK/KCNQ1/SCT	7
ssc04974	Protein digestion and absorption	7/161	104/9206	0.00225602	0.00225602	0.0620075	ATP1B3/COL17A1/KCNJ13/KCNK5/KCNQ1/SLC36A1/SLC9A3	7
ssc05204	Chemical carcinogenesis - DNA adducts	5/161	58/9206	0.00333787	0.00333787	0.0825683	CYP1A1/CYP2C42/CYP3A29/CYP3A46/GSTK1	5
ssc04970	Salivary secretion	6/161	90/9206	0.00484345	0.00484345	0.10892	ADCY9/ATP1B3/ATP2B1/BST1/DMBT1/TRPV6	6
ssc00564	Glycerophospholipid metabolism	6/161	97/9206	0.00695884	0.00695884	0.14345	GPAT3/GPD1/LOC102158609/LPGAT1/MBOAT7/PHOSPHO1	6
ssc04142	Lysosome	7/161	130/9206	0.00770313	0.00770313	0.146578	ATP6V0A1/CTNS/CTSZ/HYAL2/IDUA/LAPTM4B/SLC11A2	7
ssc04961	Endocrine and other factor-regulated calcium reabsorption	4/161	50/9206	0.0111159	0.0111159	0.183315	ADCY9/ATP1B3/ATP2B1/VDR	4
ssc04979	Cholesterol metabolism	4/161	50/9206	0.0111159	0.0111159	0.183315	APOA1/APOC3/SCARB1/STARD3	4
ssc02010	ABC transporters	4/161	51/9206	0.0119013	0.0119013	0.184001	ABCC2/ABCC3/ABCD1/LOC100153359	4
ssc00601	Glycosphingolipid biosynthesis - lacto and neolacto series	3/161	30/9206	0.0150812	0.0150812	0.219448	B4GALT1/LOC100152566/LOC100513844	3
ssc04925	Aldosterone synthesis and secretion	5/161	93/9206	0.0233063	0.0233063	0.295669	ADCY9/ATP1B3/ATP2B1/CREB3L3/SCARB1	5
ssc00140	Steroid hormone biosynthesis	4/161	63/9206	0.0241684	0.0241684	0.295669	CYP1A1/CYP2C42/CYP3A29/CYP3A46	4
ssc05216	Thyroid cancer	3/161	36/9206	0.0245846	0.0245846	0.295669	BAK1/CDH1/PPARG	3
ssc00350	Tyrosine metabolism	3/161	37/9206	0.0264188	0.0264188	0.295669	ADH4/IL4I1/TH	3
ssc00591	Linoleic acid metabolism	3/161	37/9206	0.0264188	0.0264188	0.295669	CYP2C42/CYP3A29/CYP3A46	3
ssc00604	Glycosphingolipid biosynthesis - ganglio series	2/161	15/9206	0.027491	0.027491	0.295669	B3GALT4/ST6GALNAC4	2
ssc04015	Rap1 signaling pathway	8/161	213/9206	0.0332774	0.0332774	0.34299	ADCY9/CDH1/EFNA1/LAT/LOC100621559/PIK3CD/RGS14/SKAP1	8
ssc04216	Ferroptosis	3/161	42/9206	0.0366557	0.0366557	0.35179	GCLC/SLC11A2/SLC40A1	3
ssc04918	Thyroid hormone synthesis	4/161	73/9206	0.0386775	0.0386775	0.35179	ADCY9/ATP1B3/CREB3L3/IYD	4
ssc00531	Glycosaminoglycan degradation	2/161	18/9206	0.0387166	0.0387166	0.35179	HYAL2/IDUA	2
ssc04360	Axon guidance	7/161	182/9206	0.0404543	0.0404543	0.35179	EFNA1/PIK3CD/PLXNA1/PLXNA2/RHOD/SEMA5A/SEMA6A	7
ssc04975	Fat digestion and absorption	3/161	44/9206	0.0412418	0.0412418	0.35179	APOA1/MOGAT2/SCARB1	3
ssc04024	cAMP signaling pathway	8/161	225/9206	0.0437196	0.0437196	0.360495	ADCY9/ATP1B3/ATP2B1/CREB3L3/EDN3/GIP/LOC100153359/PIK3CD	8
ssc04261	Adrenergic signaling in cardiomyocytes	6/161	149/9206	0.0464816	0.0464816	0.364571	ADCY9/ATP1B3/ATP2B1/CREB3L3/KCNQ1/PPP1R1A	6
ssc03320	PPAR signaling pathway	4/161	78/9206	0.047452	0.047452	0.364571	APOA1/APOC3/AQP7/PPARG	4
ssc00380	Tryptophan metabolism	3/161	47/9206	0.0486353	0.0486353	0.364571	AOC1/CYP1A1/IL4I1	3

## Sheet: Down-regulated genes enriched
ID	Description	GeneRatio	BgRatio	pvalue	p.adjust	qvalue	geneID	Count
ssc04061	Viral protein interaction with cytokine and cytokine receptor	4/45	85/9206	0.000755901	0.000755901	0.0867297	CCL19/CCL8/CXCL10/CXCL9	4
ssc04062	Chemokine signaling pathway	5/45	182/9206	0.00184008	0.00184008	0.105563	CCL19/CCL8/CXCL10/CXCL9/STAT1	5
ssc04120	Ubiquitin mediated proteolysis	4/45	144/9206	0.00520322	0.00520322	0.184454	ANAPC10/LOC100156381/NEDD4/UBE2L6	4
ssc03320	PPAR signaling pathway	3/45	78/9206	0.00643051	0.00643051	0.184454	FABP6/LPL/PLIN2	3
ssc04620	Toll-like receptor signaling pathway	3/45	108/9206	0.0155921	0.0155921	0.320123	CXCL10/CXCL9/STAT1	3
ssc00565	Ether lipid metabolism	2/45	47/9206	0.0219712	0.0219712	0.320123	PLB1/PLPP1	2
ssc05166	Human T-cell leukemia virus 1 infection	4/45	225/9206	0.0236719	0.0236719	0.320123	ANAPC10/CHEK1/MAD2L1/TBPL1	4
ssc05022	Pathways of neurodegeneration - multiple diseases	6/45	474/9206	0.026738	0.026738	0.320123	GP91-PHOX/GPX8/ND1/ND2/UBE2L6/WNT2B	6
ssc00190	Oxidative phosphorylation	3/45	137/9206	0.0290412	0.0290412	0.320123	ND1/ND2/PPA1	3
ssc05171	Coronavirus disease - COVID-19	4/45	251/9206	0.0335613	0.0335613	0.320123	CXCL10/GP91-PHOX/MMP3/STAT1	4
ssc00561	Glycerolipid metabolism	2/45	61/9206	0.0356308	0.0356308	0.320123	LPL/PLPP1	2
ssc05010	Alzheimer disease	5/45	384/9206	0.0382794	0.0382794	0.320123	GP91-PHOX/LPL/ND1/ND2/WNT2B	5
ssc04150	mTOR signaling pathway	3/45	153/9206	0.0384283	0.0384283	0.320123	RNF152/RRAGB/WNT2B	3
ssc04110	Cell cycle	3/45	154/9206	0.0390609	0.0390609	0.320123	ANAPC10/CHEK1/MAD2L1	3
ssc04060	Cytokine-cytokine receptor interaction	4/45	273/9206	0.0435755	0.0435755	0.332915	CCL19/CCL8/CXCL10/CXCL9	4
ssc00920	Sulfur metabolism	1/45	10/9206	0.0478427	0.0478427	0.332915	PAPSS2	1
ssc05140	Leishmaniasis	2/45	73/9206	0.0493264	0.0493264	0.332915	GP91-PHOX/STAT1	2
