# Supplementary material for: The Metabolic Pathway of Bile Secretion Is Vulnerable to Salmonella enterica Exposure in Porcine Intestinal Epithelial Cells
Source: Animals (Basel). 2024 Mar 3;14(5):789. doi: 10.3390/ani14050789 (PMC10931422; doi:10.3390/ani14050789)
Supplement: Supplementary file 1 [file animals-14-00789-s001.zip › Table S11. The differentially expressed genes in IPEC-J2 between the Salmonella-treated and LPS.xlsx]

## Sheet: saveDEG_Sal_LPS
gene	baseMean	log2FoldChange	lfcSE	stat	pvalue	padj	change	LPS_1	LPS_2	LPS_3	LPS_4	Sal_1	Sal_2	Sal_3	Sal_4
43891	36.2571	0.0714251	0.375336	0.190297	0.849077	0.925924	NOT	53	37	57	44	29	18	21	48
43892	254.251	0.264902	0.311028	0.851698	0.394382	0.618709	NOT	261	313	306	372	210	291	89	263
43895	292.489	0.583285	0.181642	3.21119	0.00132188	0.0134753	NOT	351	343	306	290	291	240	165	396
43896	163.651	-0.0813223	0.20842	-0.390185	0.6964	0.838241	NOT	262	301	174	207	156	117	62	168
43897	189.931	-0.529368	0.193658	-2.73352	0.00626619	0.0408505	NOT	317	409	272	259	165	90	66	177
43898	114.702	1.21959	0.282059	4.32389	1.53303e-05	0.000475444	UP	89	123	91	80	118	155	59	161
43899	18.8273	-0.494558	0.51524	-0.95986	0.337126	0.565872	NOT	40	50	11	27	20	8	5	19
44075	177.67	0.31921	0.396112	0.805858	0.420325	0.641521	NOT	259	139	332	123	241	87	60	289
44076	779.725	0.132462	0.17819	0.743374	0.457255	0.671609	NOT	1110	1150	764	1089	724	550	374	903
44077	9.70771	0.306051	0.835581	0.366274	0.714161	0.8478	NOT	12	5	12	16	7	0	12	11
44078	209.277	0.367997	0.342273	1.07516	0.282305	0.510043	NOT	241	149	349	233	287	103	101	283
44079	84.2518	-0.080041	0.378565	-0.211433	0.83255	0.91812	NOT	122	194	88	92	117	23	28	115
44080	145.383	-0.184172	0.296884	-0.620349	0.535028	0.73092	NOT	188	215	150	286	124	84	85	111
44081	323.353	0.535792	0.183112	2.92603	0.00343323	0.0265746	NOT	402	429	308	325	301	270	198	398
44082	352.797	-0.299688	0.218919	-1.36895	0.171016	0.375793	NOT	632	556	458	505	330	142	152	396
44083	2066.2	0.316761	0.176048	1.79929	0.0719735	0.22095	NOT	3276	2779	1952	2240	2251	1547	935	2563
44084	84.669	0.0104439	0.316909	0.0329555	0.97371	0.987539	NOT	132	152	90	99	85	26	51	108
44085	255.944	-0.287798	0.210275	-1.36867	0.171102	0.375863	NOT	471	423	326	344	285	129	95	233
44086	9.76815	-0.442857	1.12782	-0.392665	0.694567	0.836809	NOT	1	0	39	15	2	9	4	9
A1CF	720.955	1.02958	0.291028	3.53774	0.000403572	0.00560293	NOT	471	1020	606	562	777	982	329	882
A2M	12.4168	-1.52567	0.789525	-1.93239	0.0533116	0.180487	NOT	52	14	19	19	8	1	0	15
A4GALT	153.105	-0.775509	0.324363	-2.39087	0.0168084	0.0816955	NOT	288	237	172	354	105	44	70	132
A4GNT	619.663	-0.529842	0.235181	-2.25291	0.0242646	0.104705	NOT	1256	1205	1030	603	500	265	294	497
AAAS	134.685	-0.987863	0.229997	-4.29511	1.74607e-05	0.000522324	NOT	231	307	208	245	101	58	45	75
AACS	81.129	0.0887955	0.262912	0.337738	0.735561	0.860965	NOT	121	115	94	106	85	63	26	96
AAED1	34.006	-0.522487	0.438002	-1.19289	0.232914	0.453929	NOT	79	50	22	71	26	17	12	34
AAGAB	213.506	-0.0417763	0.214408	-0.194845	0.845515	0.924159	NOT	291	317	315	262	199	136	119	181
AAK1	384.047	0.628565	0.293824	2.13926	0.0324149	0.129446	NOT	253	403	503	460	447	371	218	379
AAMDC	242.385	-0.692227	0.209107	-3.3104	0.000931632	0.0102797	NOT	368	501	413	371	212	121	86	158
AAMP	195.246	0.160123	0.209682	0.763644	0.44508	0.660598	NOT	260	314	202	252	236	131	75	225
AAR2	249.418	-0.230125	0.208195	-1.10533	0.269015	0.49573	NOT	355	476	337	331	249	178	83	216
AARS	364.959	0.175006	0.173654	1.00778	0.313558	0.54206	NOT	499	546	448	409	408	248	150	439
AARS2	169.143	-0.274522	0.227111	-1.20876	0.226756	0.447166	NOT	281	367	233	165	160	103	69	147
AARSD1	580.272	-0.893753	0.211949	-4.21682	2.47772e-05	0.000690045	NOT	1150	1187	936	912	526	192	180	415
AASDH	65.4806	-0.770721	0.270767	-2.84644	0.00442113	0.0319151	NOT	113	125	110	108	53	35	17	49
AASDHPPT	68.7305	0.00856081	0.332734	0.0257287	0.979474	0.989776	NOT	133	98	73	76	73	27	48	60
AASS	7.5582	-0.417565	0.875774	-0.476795	0.633508	0.797036	NOT	9	24	8	8	4	9	4	0
AATF	136.37	-1.06725	0.258128	-4.13459	3.55587e-05	0.000903567	NOT	271	277	222	253	99	43	30	121
AATK	8.37827	-1.23942	1.09655	-1.13028	0.258357	0.483636	NOT	16	13	1	32	1	0	8	3
ABAT	121.939	0.896552	0.32766	2.73622	0.00621488	0.0406111	NOT	139	70	139	110	183	71	78	176
ABCA1	123.593	1.09291	0.506142	2.15929	0.0308278	0.125245	NOT	78	178	106	83	104	236	17	171
ABCA2	408.734	-0.219472	0.215349	-1.01915	0.308134	0.536345	NOT	610	656	547	603	328	328	166	324
ABCA3	305.144	0.360322	0.277887	1.29665	0.194751	0.40756	NOT	479	543	218	285	336	306	121	306
ABCA5	238.048	-1.02471	0.289781	-3.53614	0.000406012	0.00561887	NOT	398	561	510	297	114	81	114	151
ABCA6	13.7121	0.445485	0.710267	0.627208	0.530523	0.728338	NOT	34	11	11	8	3	16	12	11
ABCA7	506.814	0.647259	0.247771	2.61232	0.00899294	0.0527048	NOT	441	490	599	597	601	344	359	579
ABCB1	174.007	-0.0787994	0.376623	-0.209226	0.834272	0.918333	NOT	178	269	398	128	127	162	60	174
ABCB10	121.583	0.228855	0.298834	0.765828	0.443779	0.6593	NOT	171	260	113	100	147	102	39	137
ABCB6	127.085	-0.344014	0.353122	-0.974207	0.329954	0.558886	NOT	179	320	222	88	133	91	32	105
ABCB7	68.3923	-0.714341	0.294332	-2.42699	0.0152247	0.076471	NOT	138	130	92	114	63	22	21	64
ABCB8	117.731	-0.455806	0.287485	-1.58549	0.112855	0.293135	NOT	223	277	161	115	109	78	29	105
ABCB9	53.9137	0.349937	0.445466	0.785552	0.43213	0.650179	NOT	34	71	62	88	31	69	24	54
ABCC1	29.0504	-0.331049	0.386472	-0.856592	0.39167	0.616063	NOT	43	47	33	53	17	19	15	26
ABCC10	235.317	-0.567652	0.309251	-1.83557	0.0664215	0.20963	NOT	297	445	527	266	186	89	127	166
ABCC2	363.893	0.224838	0.381182	0.589844	0.555295	0.74358	NOT	381	424	768	239	270	407	157	338
ABCC3	147.958	-0.171654	0.40474	-0.424109	0.671487	0.822015	NOT	409	178	198	96	173	64	41	199
ABCC4	16.1787	-1.49903	0.580378	-2.58285	0.0097987	0.0562506	DOWN	24	28	25	49	6	6	7	5
ABCC5	148.168	-0.612756	0.347285	-1.76442	0.0776617	0.232318	NOT	408	177	272	132	134	63	49	133
ABCC6	57.4904	0.178168	0.515611	0.345547	0.729683	0.8576	NOT	42	101	122	32	36	77	15	58
ABCD1	1189.59	0.315531	0.327083	0.964682	0.334704	0.563574	NOT	1252	1605	1329	1613	1162	1407	285	1346
ABCD3	298.342	0.689729	0.241653	2.85422	0.00431431	0.031388	NOT	406	379	279	217	329	318	128	384
ABCD4	80.9867	0.0409509	0.276176	0.148278	0.882123	0.943946	NOT	109	160	102	76	63	63	45	75
ABCE1	139.538	-0.118144	0.282605	-0.418055	0.675907	0.824819	NOT	249	258	139	174	165	54	53	174
ABCF1	296.532	0.0827388	0.220281	0.375605	0.70721	0.843939	NOT	443	507	335	330	333	147	121	406
ABCF2	103.558	1.00381	0.237574	4.22525	2.38676e-05	0.000670347	NOT	118	100	78	86	131	73	70	162
ABCF3	300.709	-0.235446	0.198737	-1.18471	0.236132	0.45815	NOT	416	564	429	398	325	175	103	288
ABCG1	32.1346	-0.0750011	0.471663	-0.159014	0.873658	0.938855	NOT	22	64	24	71	28	25	14	29
ABCG2	127.026	-0.0296453	0.354734	-0.0835703	0.933398	0.969727	NOT	105	205	270	117	107	106	59	107
ABCG5	227.234	-0.320439	0.395118	-0.810996	0.417368	0.639016	NOT	148	438	577	209	166	164	82	217
ABCG8	362.388	0.0244356	0.250844	0.0974137	0.922398	0.96368	NOT	398	686	570	346	333	303	140	365
ABHD1	40.5909	0.243699	0.464216	0.52497	0.599604	0.77432	NOT	60	72	62	18	50	24	9	70
ABHD10	38.4659	0.543069	0.347574	1.56246	0.118181	0.300963	NOT	56	46	43	29	39	21	25	59
ABHD11	146.174	0.611042	0.203102	3.00854	0.00262504	0.0219278	NOT	151	189	157	142	154	111	85	203
ABHD12	144.89	-0.0235505	0.277589	-0.0848395	0.932389	0.969353	NOT	205	273	119	219	108	122	69	134
ABHD12B	13.5729	-1.37517	0.690704	-1.99097	0.0464846	0.16423	DOWN	18	15	31	40	7	6	0	13
ABHD13	76.1075	-0.66166	0.261179	-2.53336	0.0112974	0.0625514	NOT	143	140	125	108	66	44	23	52
ABHD14A	318.544	-0.632123	0.219231	-2.88337	0.00393449	0.0292983	NOT	558	624	554	408	259	115	142	263
ABHD14B	470.722	0.986286	0.206187	4.78345	1.72311e-06	8.88678e-05	NOT	585	524	337	330	631	390	244	759
ABHD15	8.69944	0.997218	0.697698	1.4293	0.152918	0.351442	NOT	12	4	6	10	15	3	4	18
ABHD16A	316.55	0.040942	0.234239	0.174787	0.861247	0.931695	NOT	394	565	432	345	261	288	121	324
ABHD17A	1688.17	0.392927	0.181405	2.16602	0.0303096	0.123627	NOT	2247	2464	1769	1660	1770	1533	713	2029
ABHD17B	154.737	0.689921	0.26799	2.57443	0.0100405	0.0572306	NOT	181	221	162	104	182	116	63	273
ABHD17C	245.011	0.555163	0.262137	2.11784	0.0341888	0.134715	NOT	416	322	168	216	295	200	106	340
ABHD18	23.1277	0.59329	0.406124	1.46086	0.144054	0.338914	NOT	29	29	23	21	35	13	16	22
ABHD2	452.261	1.27962	0.385653	3.31805	0.000906476	0.010082	UP	309	311	359	440	428	825	220	386
ABHD3	90.8112	0.541926	0.433896	1.24898	0.211674	0.428487	NOT	93	126	123	67	73	148	28	69
ABHD4	269.22	0.330957	0.204922	1.61504	0.106303	0.282936	NOT	359	367	360	234	272	207	129	337
ABHD5	60.2803	1.38546	0.519982	2.66444	0.00771173	0.0470877	UP	53	37	84	8	92	40	36	120
ABHD6	293.622	-0.131656	0.274956	-0.478828	0.632061	0.796079	NOT	508	518	436	256	260	265	97	245
ABHD8	29.3745	0.142688	0.450885	0.316461	0.751652	0.871867	NOT	22	40	37	50	21	27	19	21
ABI1	237.675	0.565886	0.203036	2.78712	0.00531784	0.0362462	NOT	315	326	208	224	263	150	136	356
ABI2	26.687	-0.347161	0.48052	-0.722468	0.470006	0.681767	NOT	33	45	24	62	38	10	9	20
ABI3BP	123.341	-1.01325	0.447898	-2.26224	0.0236824	0.102991	NOT	132	307	95	370	41	58	57	78
ABL1	409.57	-0.0344692	0.223994	-0.153884	0.877701	0.941219	NOT	578	677	399	642	457	294	151	384
ABL2	102.958	0.163405	0.261475	0.624936	0.532013	0.729377	NOT	146	147	133	112	107	94	34	110
ABLIM1	691.308	0.421803	0.256514	1.64437	0.1001	0.272617	NOT	679	889	1047	616	774	644	270	828
ABLIM2	26.0747	-0.0804507	0.588647	-0.136671	0.891291	0.948218	NOT	36	44	12	54	10	20	23	13
ABLIM3	23.8789	0.0540163	0.523806	0.103123	0.917866	0.961867	NOT	42	29	9	49	24	11	12	31
ABO	11.5727	-1.57048	0.845624	-1.85719	0.0632844	0.202072	NOT	26	17	46	4	6	0	5	7
ABR	784.382	-0.179895	0.176344	-1.02014	0.307663	0.535975	NOT	1167	1442	983	1047	663	424	317	965
ABRACL	114.244	1.05718	0.44555	2.37274	0.0176567	0.0845657	NOT	135	76	130	64	173	28	75	246
ABRAXAS1	49.6502	-0.121998	0.369677	-0.330012	0.741391	0.864714	NOT	63	68	97	55	42	30	14	72
ABRAXAS2	65.6145	-0.254805	0.322125	-0.791013	0.428936	0.647614	NOT	110	148	96	53	59	42	19	75
ABT1	114.876	0.516623	0.322384	1.60251	0.109043	0.287146	NOT	182	111	97	130	152	47	79	149
ABTB1	79.1589	-0.0433135	0.269644	-0.160632	0.872383	0.938282	NOT	113	163	97	78	67	58	42	68
ABTB2	58.987	1.13441	0.295361	3.84075	0.000122658	0.00224739	NOT	60	59	32	55	80	60	30	88
ACAA1	1266.71	-0.333973	0.222151	-1.50336	0.132746	0.324071	NOT	1749	2101	2459	1427	1207	666	479	1235
ACAA2	95.4007	0.774131	0.262091	2.95367	0.00314016	0.0247323	NOT	98	95	103	91	146	69	44	134
ACACA	280.938	-0.553649	0.202878	-2.72898	0.0063531	0.0410901	NOT	570	562	314	425	228	133	112	241
ACACB	29.4265	0.134911	0.613754	0.219812	0.826017	0.914114	NOT	25	49	17	61	11	33	24	11
ACAD10	162.36	-0.417579	0.234593	-1.78002	0.0750728	0.227607	NOT	226	346	283	180	128	95	60	155
ACAD11	78.6672	0.346013	0.322996	1.07126	0.284053	0.511567	NOT	62	144	105	74	58	62	48	99
ACAD8	198.572	0.468446	0.288517	1.62364	0.104454	0.279811	NOT	198	206	280	218	212	182	68	287
ACAD9	205.694	-0.432135	0.21952	-1.96854	0.0490055	0.17043	NOT	307	464	320	232	167	121	90	157
ACADL	128.1	0.84973	0.344897	2.46372	0.0137503	0.0716857	NOT	134	98	147	117	136	72	60	291
ACADM	277.412	1.09206	0.348187	3.13641	0.00171028	0.0162453	NOT	328	155	293	184	359	134	183	567
ACADS	448.837	-0.0596571	0.243868	-0.244629	0.806744	0.904356	NOT	766	642	688	438	483	246	153	575
ACADSB	242.419	-0.474245	0.296198	-1.60111	0.109353	0.287799	NOT	530	398	207	428	155	151	119	173
ACADVL	879.366	-0.482237	0.228577	-2.10973	0.0348813	0.136561	NOT	1324	1503	1701	1090	724	519	252	882
ACAP1	301.771	0.415924	0.360439	1.15394	0.248526	0.472815	NOT	230	242	542	349	364	145	204	359
ACAP2	193.254	0.325921	0.236272	1.37943	0.167761	0.371218	NOT	301	291	223	146	188	161	106	200
ACAP3	101.439	0.494744	0.332461	1.48812	0.136718	0.329719	NOT	120	193	87	80	59	95	60	146
ACAT1	179.339	0.243228	0.231062	1.05265	0.2925	0.519914	NOT	240	259	189	223	162	147	67	249
ACAT2	211.861	-0.656846	0.236535	-2.77695	0.00548724	0.0370561	NOT	495	380	260	313	163	120	59	184
ACBD3	74.7847	0.915774	0.289771	3.16033	0.00157589	0.0153402	NOT	78	54	81	68	103	61	42	104
ACBD4	44.9852	-0.0706565	0.424959	-0.166267	0.867947	0.935751	NOT	53	128	40	48	46	19	13	73
ACBD5	326.555	0.611521	0.231368	2.64307	0.00821589	0.0493343	NOT	448	455	319	233	329	234	168	542
ACBD6	170.107	-0.082467	0.200791	-0.410711	0.681285	0.828839	NOT	240	338	194	210	174	110	73	162
ACCS	20.8879	-0.403794	0.402724	-1.00266	0.316027	0.544369	NOT	30	38	32	31	16	13	8	19
ACD	133.517	-0.196094	0.298853	-0.656156	0.511724	0.71441	NOT	228	151	211	181	107	111	60	92
ACE	3801.89	0.912835	0.922603	0.989413	0.322461	0.550987	NOT	363	6200	3628	4369	2049	7817	1843	1731
ACE2	2087.47	0.366106	0.324043	1.12981	0.258557	0.48368	NOT	1920	2538	3399	2026	1901	2545	849	1753
ACER3	63.1211	-0.403277	0.361483	-1.11562	0.264586	0.491655	NOT	91	106	79	121	68	26	13	80
ACHE	32.5278	-1.64733	0.689955	-2.38758	0.0169595	0.0821144	DOWN	61	111	7	100	6	22	5	13
ACIN1	747.243	-0.240137	0.2314	-1.03776	0.299383	0.526976	NOT	894	1208	1372	937	600	480	368	619
ACKR1	23.9	-0.120856	0.441829	-0.273535	0.784442	0.89086	NOT	42	32	22	40	21	8	16	25
ACKR2	15.0763	-0.401049	0.740446	-0.541631	0.588073	0.766107	NOT	50	5	32	7	14	8	3	19
ACKR3	56.4165	-0.908035	0.421452	-2.15454	0.0311978	0.12618	NOT	159	82	48	115	25	23	29	37
ACKR4	41.0617	-0.614967	0.366193	-1.67935	0.0930837	0.259848	NOT	64	69	93	45	26	19	17	39
ACLY	315.695	-0.55629	0.197216	-2.82071	0.0047918	0.0337868	NOT	669	623	426	387	221	177	126	264
ACO1	427.288	0.413854	0.161231	2.56684	0.0102629	0.0581646	NOT	543	653	423	427	475	305	251	476
ACO2	1335.4	-0.154367	0.242089	-0.637644	0.523706	0.72376	NOT	1997	3225	1377	1446	1364	698	461	1656
ACOT11	487.502	-0.133292	0.294376	-0.452794	0.650697	0.809082	NOT	392	875	931	585	403	363	216	439
ACOT12	20.2278	0.676768	0.682469	0.991647	0.32137	0.549947	NOT	12	42	29	6	11	36	4	25
ACOT13	146.926	0.0466135	0.252833	0.184365	0.853727	0.928761	NOT	213	230	205	156	135	82	55	221
ACOT6	22.7494	-0.316879	0.483213	-0.655776	0.511968	0.714559	NOT	45	39	35	22	29	4	12	20
ACOT7	104.818	0.108472	0.365205	0.297016	0.766454	0.87944	NOT	195	119	140	103	128	29	51	155
ACOT8	415.126	-0.145743	0.190965	-0.763195	0.445347	0.660785	NOT	608	744	621	450	355	303	170	395
ACOT9	123.793	-0.13815	0.32324	-0.427392	0.669094	0.820965	NOT	138	163	271	126	107	72	65	116
ACOX1	1041.21	0.815253	0.237776	3.42866	0.000606568	0.00747475	NOT	895	1324	1109	850	1178	1208	468	1278
ACOX2	108.567	-0.861162	0.334849	-2.57179	0.0101174	0.0575979	NOT	165	357	167	115	99	49	37	54
ACOX3	36.3505	-0.466547	0.43535	-1.07166	0.283873	0.51152	NOT	52	74	55	53	23	39	6	26
ACP1	520.024	-0.726435	0.193138	-3.76122	0.000169086	0.00288788	NOT	1093	1150	733	670	447	214	183	400
ACP2	1015.32	0.175768	0.340559	0.516117	0.605773	0.778244	NOT	1125	2123	1226	924	1058	1205	265	816
ACP5	197.936	-0.33547	0.361938	-0.926871	0.353994	0.581773	NOT	408	236	409	156	176	139	45	215
ACP6	273.965	-0.00353637	0.291235	-0.0121427	0.990312	0.995124	NOT	412	474	437	211	308	120	105	382
ACPT	58.268	0.15498	0.314191	0.493266	0.621825	0.788649	NOT	74	119	77	42	64	41	29	57
ACRBP	17.6339	-0.569585	0.611495	-0.931462	0.351615	0.579801	NOT	10	35	47	21	12	15	7	7
ACSBG1	15.3591	-0.888074	0.656551	-1.35263	0.176172	0.383373	NOT	7	42	19	41	9	3	8	13
ACSF2	606.49	0.315247	0.22247	1.41703	0.156474	0.355913	NOT	683	957	813	545	588	474	385	551
ACSF3	381.823	-0.606042	0.220487	-2.74865	0.00598419	0.0396055	NOT	860	762	480	491	313	214	106	343
ACSL1	47.8633	-0.309507	0.387477	-0.798774	0.424421	0.643868	NOT	124	81	50	43	36	22	30	39
ACSL3	811.268	1.03676	0.28293	3.66438	0.000247941	0.00385763	NOT	840	711	833	536	926	1078	330	1078
ACSL4	91.828	0.0824159	0.317607	0.25949	0.795257	0.897767	NOT	163	126	128	77	105	38	60	87
ACSL5	1159.17	-0.435788	0.255003	-1.70895	0.0874598	0.250231	NOT	1391	2230	1992	1708	1111	807	302	938
ACSS1	787.142	0.313254	0.188175	1.6647	0.0959726	0.264585	NOT	1119	1040	733	988	751	663	396	879
ACSS2	226.821	0.230212	0.198691	1.15864	0.246603	0.470662	NOT	306	378	258	223	216	143	141	247
ACSS3	39.9822	0.944486	0.35894	2.63132	0.00850543	0.0504665	NOT	58	37	21	37	56	31	22	60
ACTA1	12.0045	-0.937524	0.879014	-1.06656	0.286169	0.513472	NOT	2	40	16	30	14	0	5	8
ACTA2	500.459	0.31588	0.255327	1.23716	0.216029	0.435025	NOT	709	627	351	767	495	387	279	537
ACTB	40480.1	-0.452806	0.25168	-1.79913	0.0719976	0.220958	NOT	72736	55172	63296	63397	43106	16245	12100	43208
ACTC1	47.4877	-1.1297	0.348679	-3.23994	0.00119554	0.0124145	NOT	62	108	75	111	26	20	15	31
ACTG1	10440.6	0.514492	0.177314	2.90159	0.00371278	0.0279655	NOT	13373	13040	9133	12015	11488	9398	4986	12607
ACTG2	2275.3	-0.789398	0.667838	-1.18202	0.237198	0.459641	NOT	2856	5269	1104	6671	1277	923	1474	797
ACTL6A	43.7797	0.707769	0.370474	1.91044	0.0560761	0.186987	NOT	59	59	32	36	55	19	39	51
ACTL6B	7.09313	-1.66785	1.00898	-1.653	0.0983301	0.268954	NOT	5	5	4	41	5	2	1	3
ACTN1	265.151	-0.589329	0.372218	-1.58329	0.113356	0.29378	NOT	346	532	183	686	150	137	137	197
ACTN2	99.3196	-1.70843	0.502451	-3.4002	0.000673369	0.00809031	DOWN	191	226	52	361	54	24	33	25
ACTN4	839.016	-0.173406	0.192091	-0.90273	0.366669	0.593016	NOT	1567	1135	1067	1127	817	480	337	885
ACTR10	195.956	0.650881	0.212088	3.06892	0.00214832	0.0191397	NOT	216	227	171	227	224	145	100	300
ACTR1A	1643.62	0.0115675	0.178271	0.0648873	0.948264	0.975938	NOT	2524	2695	1836	2058	1752	1166	584	1816
ACTR1B	53.2228	1.18643	0.295369	4.01679	5.89966e-05	0.00131025	NOT	57	54	41	29	64	46	41	75
ACTR2	990.343	0.398702	0.313084	1.27347	0.202852	0.417364	NOT	1435	1041	1102	1100	1215	322	547	1660
ACTR3	667.259	0.38604	0.210805	1.83127	0.0670606	0.211033	NOT	965	772	709	735	712	384	451	765
ACTR3B	48.6426	-0.496366	0.316304	-1.56927	0.116585	0.298483	NOT	63	99	84	67	43	26	22	32
ACTR5	89.7354	-0.462401	0.310997	-1.48683	0.137059	0.330002	NOT	117	176	188	93	73	61	27	77
ACTR6	57.5351	-0.52218	0.308127	-1.69469	0.0901338	0.254845	NOT	92	132	71	84	43	20	31	51
ACTR8	71.2764	0.238988	0.330919	0.722194	0.470175	0.681856	NOT	87	109	116	51	89	61	26	69
ACVR1	45.7699	-0.517594	0.47874	-1.08116	0.279627	0.50746	NOT	74	91	48	84	41	6	34	29
ACVR1B	180.122	0.0565427	0.32566	0.173625	0.86216	0.932328	NOT	300	362	194	150	131	196	57	182
ACVR1C	11.8107	0.137041	0.891493	0.153721	0.87783	0.941219	NOT	29	33	3	4	28	1	2	15
ACVR2A	14.1197	-2.15974	0.676539	-3.19234	0.00141125	0.0142063	DOWN	27	46	39	17	10	2	3	1
ACVR2B	27.2961	0.4181	0.603696	0.692568	0.488581	0.697079	NOT	24	59	24	26	15	52	6	17
ACVRL1	67.5726	-0.31595	0.397286	-0.795273	0.426455	0.645608	NOT	111	79	67	150	80	30	16	79
ACY1	210.964	0.338016	0.268915	1.25696	0.208768	0.424488	NOT	306	242	296	181	228	194	75	256
ACYP1	101.161	-0.0338135	0.288213	-0.117321	0.906606	0.956326	NOT	104	170	123	162	93	52	64	92
ACYP2	28.2991	0.154256	0.442461	0.348633	0.727365	0.855886	NOT	44	50	23	32	18	30	18	18
ADA	1922.63	-0.277661	0.622916	-0.445744	0.655782	0.813014	NOT	4416	1553	4509	941	2399	667	516	2457
ADAL	71.8881	-0.347226	0.328501	-1.057	0.29051	0.51764	NOT	108	142	116	84	78	20	28	84
ADAM10	29.5597	1.57831	0.647323	2.43821	0.0147602	0.0749308	UP	39	8	28	6	44	57	9	25
ADAM15	812.922	0.3094	0.242565	1.27553	0.202121	0.416659	NOT	915	1042	993	1015	788	837	375	717
ADAM17	69.7712	-0.739582	0.321229	-2.30235	0.0213155	0.0961821	NOT	124	130	100	123	48	21	40	46
ADAM19	54.6323	-0.462857	0.33387	-1.38634	0.165643	0.368405	NOT	97	81	61	107	53	21	25	45
ADAM23	19.2186	0.0649619	0.612109	0.106128	0.915481	0.960668	NOT	24	24	26	26	10	19	17	4
ADAM28	17.7632	0.320445	0.699757	0.457937	0.646998	0.807011	NOT	11	27	45	3	23	6	13	19
ADAM33	124.467	-0.432706	0.478291	-0.904691	0.365629	0.59209	NOT	78	251	121	324	60	113	60	62
ADAM8	8.3053	0.463979	0.658468	0.704634	0.481038	0.690562	NOT	7	8	10	12	9	9	5	5
ADAM9	16.6656	0.843232	0.5512	1.52981	0.126064	0.313481	NOT	24	11	24	6	24	11	12	19
ADAMDEC1	222.301	1.28061	0.232959	5.49713	3.86024e-08	4.16696e-06	UP	243	203	149	132	328	225	108	357
ADAMTS1	25.5393	-0.151938	0.622119	-0.244226	0.807056	0.904487	NOT	37	15	13	76	21	8	15	32
ADAMTS10	25.4252	0.254153	0.523856	0.485157	0.627565	0.792782	NOT	29	56	17	31	32	4	15	41
ADAMTS12	28.435	-0.330807	0.559395	-0.591366	0.554275	0.742775	NOT	31	63	31	51	16	39	4	16
ADAMTS15	85.1286	-1.06256	0.349036	-3.04426	0.00233253	0.0201617	NOT	190	118	163	150	49	21	42	52
ADAMTS19	52.6465	-0.561608	0.35897	-1.5645	0.1177	0.29996	NOT	84	96	80	86	41	46	10	36
ADAMTS2	27.8867	0.0508405	0.454523	0.111855	0.910939	0.957923	NOT	49	53	15	37	29	18	19	17
ADAMTS3	19.2317	-0.501017	0.648434	-0.772657	0.439725	0.655586	NOT	17	34	22	47	2	12	14	15
ADAMTS5	24.9974	-0.122194	0.524376	-0.233027	0.815741	0.908625	NOT	39	50	17	41	45	11	10	11
ADAMTS6	47.2147	-1.08756	0.443808	-2.45051	0.0142653	0.0734632	NOT	57	121	90	84	23	33	17	12
ADAMTS7	32.9485	-0.495302	0.410616	-1.20624	0.227724	0.447856	NOT	48	53	34	75	35	13	14	24
ADAMTS8	25.7313	-1.63435	0.570418	-2.86517	0.00416781	0.0305778	DOWN	28	63	29	91	19	9	5	6
ADAMTS9	28.0291	0.854191	0.458366	1.86356	0.0623837	0.200298	NOT	28	19	33	26	36	18	28	21
ADAMTSL1	13.4963	-1.28095	0.770339	-1.66284	0.0963447	0.265297	NOT	27	39	7	33	3	9	7	1
ADAMTSL2	25.6124	-0.117175	0.744939	-0.157295	0.875013	0.939521	NOT	19	56	8	63	16	4	31	11
ADAMTSL3	17.2695	-0.60999	0.721007	-0.846024	0.397539	0.621754	NOT	28	41	6	40	5	4	17	9
ADAMTSL4	35.7152	0.162352	0.447723	0.362617	0.716891	0.849192	NOT	51	50	48	36	22	49	14	24
ADAMTSL5	64.9505	0.721699	0.426367	1.69267	0.0905186	0.255444	NOT	67	36	86	70	53	85	40	54
ADAP1	214.427	0.313284	0.241833	1.29546	0.195162	0.408115	NOT	286	289	294	185	215	186	122	189
ADAP2	64.5757	0.997091	0.32006	3.11533	0.0018374	0.0171028	NOT	66	68	71	35	108	40	38	93
ADAR	334.6	-0.499209	0.238591	-2.09232	0.0364096	0.140211	NOT	620	493	463	564	207	230	138	257
ADARB1	67.6143	0.00479829	0.335039	0.0143216	0.988573	0.994142	NOT	86	93	74	113	41	61	36	61
ADARB2	7.2614	-0.1929	0.935888	-0.206115	0.836701	0.919431	NOT	5	36	4	3	8	9	1	3
ADAT1	10.1336	0.248087	0.601925	0.412155	0.680226	0.828129	NOT	14	20	13	6	8	5	5	18
ADAT2	73.6804	-0.43974	0.358115	-1.22793	0.219474	0.438886	NOT	80	127	177	77	62	49	25	59
ADAT3	10.2825	-0.601647	0.605904	-0.992975	0.320722	0.549527	NOT	18	19	18	13	11	2	6	6
ADCK1	9.99803	-0.013005	0.697458	-0.0186462	0.985123	0.992528	NOT	16	17	21	2	11	4	6	10
ADCK2	81.8276	-0.328386	0.338947	-0.968844	0.332623	0.5617	NOT	137	150	87	134	99	61	18	56
ADCK5	1315.38	-0.356814	0.314147	-1.13582	0.256033	0.480786	NOT	1277	2261	3058	1417	971	909	614	930
ADCY1	6.86179	-1.1227	0.737474	-1.52236	0.127919	0.316221	NOT	16	16	13	8	2	2	2	8
ADCY2	9.01284	1.46197	0.826939	1.76793	0.077073	0.231248	NOT	13	5	3	5	5	10	14	3
ADCY3	16.1935	-0.466155	0.65638	-0.710191	0.477586	0.687725	NOT	30	30	16	30	29	1	3	16
ADCY4	222.974	0.832427	0.77909	1.06846	0.285313	0.512511	NOT	63	98	142	514	230	312	81	259
ADCY5	102.867	-0.279389	0.356527	-0.783639	0.433252	0.650602	NOT	106	143	118	236	71	64	58	80
ADCY6	303.436	-0.475313	0.191914	-2.4767	0.0132602	0.0698105	NOT	464	694	432	391	267	177	111	239
ADCY7	34.123	-0.538973	0.471709	-1.1426	0.253205	0.477749	NOT	78	46	71	29	34	8	10	43
ADCY8	7.95997	-0.560246	0.979959	-0.571704	0.567523	0.752786	NOT	11	14	9	16	1	3	10	0
ADCY9	325.417	-0.165952	0.19907	-0.833636	0.404486	0.627754	NOT	484	600	414	419	258	249	117	339
ADCYAP1R1	21.4285	0.66453	0.572405	1.16094	0.245665	0.469593	NOT	21	35	22	17	35	16	1	43
ADD1	588.867	0.134185	0.252124	0.532218	0.594575	0.771027	NOT	879	1049	451	779	504	545	250	592
ADD3	323.762	0.572828	0.235458	2.43283	0.0149815	0.0756406	NOT	437	423	296	297	318	178	205	531
ADGRA2	126.724	-0.35269	0.405849	-0.869018	0.384837	0.610887	NOT	204	247	56	283	102	84	60	86
ADGRA3	228.699	-0.790634	0.203731	-3.88077	0.000104125	0.00199716	NOT	388	479	417	322	167	124	64	175
ADGRB1	61.2994	-0.759764	0.421586	-1.80216	0.0715205	0.220045	NOT	121	128	34	145	42	36	24	34
ADGRB2	9.12988	-1.55572	0.768386	-2.02466	0.0429018	0.155575	DOWN	14	38	4	23	6	2	2	5
ADGRD1	70.0617	-0.807403	0.450798	-1.79105	0.0732849	0.223648	NOT	77	201	49	171	38	42	33	32
ADGRE5	198.094	-0.947485	0.229704	-4.12481	3.71049e-05	0.00093224	NOT	433	343	295	365	136	101	49	144
ADGRF1	50.4402	0.129266	0.497534	0.259813	0.795008	0.897631	NOT	34	76	110	39	46	30	44	25
ADGRF2	18.9157	0.0961907	0.501277	0.191891	0.847827	0.925496	NOT	23	16	20	39	24	12	7	20
ADGRF5	27.7553	-1.44137	0.441447	-3.26511	0.00109422	0.0116224	DOWN	67	37	52	62	11	8	9	18
ADGRG1	490.445	0.0844481	0.225581	0.374358	0.708138	0.844393	NOT	690	723	735	482	637	296	188	522
ADGRG5	11.9518	-0.0776948	0.547142	-0.142001	0.887079	0.945978	NOT	13	16	20	17	10	11	5	9
ADGRG6	31.087	0.408864	0.618	0.661591	0.508233	0.711414	NOT	34	42	36	34	7	58	14	16
ADGRG7	426.916	-0.165129	0.254803	-0.648066	0.516942	0.717332	NOT	595	825	678	417	338	360	189	314
ADGRL1	171.097	-0.261294	0.50274	-0.51974	0.603245	0.776788	NOT	158	321	103	435	111	134	118	51
ADGRL2	57.5625	-0.410661	0.370966	-1.10701	0.268292	0.495157	NOT	145	89	48	86	35	30	22	71
ADGRL3	7.38147	-1.31881	0.880317	-1.49811	0.134104	0.325623	NOT	8	33	14	6	2	0	4	7
ADGRL4	31.6177	-1.40146	0.45757	-3.06283	0.00219256	0.0193907	DOWN	45	69	49	84	15	6	15	15
ADH1C	12.756	-1.22105	0.701686	-1.74017	0.081829	0.240137	NOT	40	10	22	23	7	1	8	6
ADH4	55.293	-0.169963	0.456958	-0.371946	0.709933	0.846099	NOT	91	95	61	79	39	70	7	46
ADH5	301.347	0.336321	0.193898	1.73453	0.0828249	0.241515	NOT	408	469	347	266	365	182	167	345
ADHFE1	7.76994	-0.335001	0.768827	-0.435731	0.663032	0.818141	NOT	7	20	6	16	11	7	1	3
ADI1	700.464	0.030456	0.209814	0.145157	0.884587	0.944767	NOT	969	1248	840	817	804	440	226	873
ADIPOR1	198.18	-0.543319	0.247152	-2.19832	0.0279265	0.116371	NOT	406	271	272	337	141	104	67	203
ADIPOR2	126.337	-0.265749	0.27863	-0.953769	0.340201	0.569044	NOT	204	175	224	150	104	102	42	108
ADIRF	29.1045	-1.12835	0.666236	-1.69362	0.090337	0.255212	NOT	87	53	31	50	7	27	11	2
ADK	81.7735	0.455986	0.258252	1.76566	0.0774524	0.231855	NOT	122	100	84	76	82	51	52	109
ADM	63.6086	0.205819	0.334367	0.61555	0.538191	0.732511	NOT	80	67	72	99	71	30	44	62
ADM5	10.455	-1.41622	0.720827	-1.96471	0.0494474	0.171197	DOWN	28	33	8	19	9	0	3	7
ADNP	227.926	-0.345165	0.212772	-1.62223	0.104754	0.280274	NOT	401	414	242	362	201	109	99	225
ADNP2	60.4346	0.441169	0.302754	1.45719	0.145064	0.340185	NOT	88	92	45	62	72	48	38	52
ADO	83.883	0.722881	0.270723	2.67018	0.00758096	0.0465865	NOT	113	80	84	72	110	51	52	119
ADORA2A	30.8975	-0.101655	0.475326	-0.213865	0.830653	0.917202	NOT	42	56	27	52	22	39	9	18
ADPGK	51.4552	-0.711893	0.287375	-2.47723	0.0132407	0.0698105	NOT	92	108	75	81	38	31	14	40
ADPRH	88.7942	0.09011	0.472565	0.190683	0.848774	0.925833	NOT	71	111	157	121	54	129	28	53
ADPRHL2	200.418	0.0335224	0.206935	0.161995	0.87131	0.937562	NOT	319	306	247	230	215	147	71	217
ADPRM	571.476	-0.243315	0.253662	-0.95921	0.337453	0.566081	NOT	691	1016	965	731	483	480	211	418
ADRA1A	15.5729	-0.920649	0.563972	-1.63244	0.102588	0.276633	NOT	31	32	10	39	9	9	6	8
ADRB2	13.8031	-1.03868	0.732107	-1.41876	0.15597	0.355115	NOT	24	19	6	49	4	4	9	8
ADRM1	676.378	-0.419997	0.179574	-2.33885	0.0193432	0.0899647	NOT	1073	1228	823	1153	561	377	245	655
ADSL	140.079	-0.302919	0.290853	-1.04149	0.29765	0.52512	NOT	157	286	278	135	111	80	62	137
ADSS	92.7226	0.717253	0.246735	2.90698	0.00364939	0.027657	NOT	120	98	97	74	114	75	46	134
ADSSL1	7.52499	0.933654	0.910534	1.02539	0.305179	0.533603	NOT	5	5	6	11	8	12	6	0
ADTRP	57.3939	-0.410887	0.387007	-1.0617	0.28837	0.515872	NOT	117	81	46	117	37	38	16	68
AEBP1	141.834	-0.471718	0.267985	-1.76024	0.0783675	0.233426	NOT	252	249	156	255	148	85	44	100
AEBP2	127.319	0.438088	0.231202	1.89483	0.0581148	0.191834	NOT	158	203	97	149	141	96	64	162
AEN	196.346	0.223493	0.187859	1.18968	0.23417	0.455313	NOT	276	316	190	231	210	139	91	229
AES	1323.93	0.292494	0.185132	1.57992	0.114124	0.294948	NOT	1798	1909	1133	1763	1423	917	635	1657
AFAP1	51.5594	-0.519115	0.442463	-1.17324	0.2407	0.463524	NOT	139	48	99	46	52	34	16	30
AFAP1L1	34.5973	0.0488733	0.386092	0.126585	0.899269	0.95292	NOT	44	62	59	26	36	22	11	47
AFAP1L2	26.5373	0.810686	0.491251	1.65025	0.0988921	0.269992	NOT	41	40	18	13	50	25	6	33
AFDN	832.575	0.108049	0.193703	0.557806	0.576977	0.758392	NOT	896	1447	1070	1028	872	572	331	1004
AFF1	153.032	0.113029	0.238675	0.47357	0.635807	0.797985	NOT	202	310	177	144	135	110	64	198
AFF3	21.3084	0.282244	0.583823	0.483442	0.628782	0.79386	NOT	20	20	43	21	39	5	6	33
AFF4	340.578	0.579069	0.2045	2.83163	0.00463111	0.0328686	NOT	371	403	383	346	397	247	154	532
AFG1L	50.5873	-0.0166599	0.337422	-0.0493741	0.960621	0.981556	NOT	97	84	64	41	41	45	19	51
AFG3L2	302.936	-0.0756987	0.184464	-0.410371	0.681534	0.828925	NOT	431	526	367	403	285	226	115	302
AFMID	97.1235	-0.481499	0.253961	-1.89596	0.0579656	0.191482	NOT	173	181	138	133	84	47	50	63
AFTPH	322.998	0.270723	0.224008	1.20854	0.226839	0.447223	NOT	533	459	341	305	314	185	161	479
AGA	35.6775	-0.733388	0.470033	-1.56029	0.118691	0.301765	NOT	51	61	102	28	34	11	15	24
AGAP1	198.733	0.336706	0.1976	1.70398	0.0883849	0.252104	NOT	239	281	192	257	217	144	110	215
AGAP2	30.5801	0.64189	0.357393	1.79604	0.0724888	0.221799	NOT	43	31	30	28	39	18	19	42
AGAP3	181.999	-0.141837	0.351839	-0.403131	0.686852	0.831888	NOT	249	307	123	373	147	169	65	146
AGBL2	18.6354	0.132167	0.521481	0.253446	0.799924	0.900725	NOT	20	35	26	17	11	23	10	11
AGBL3	10.3095	0.940799	0.656997	1.43197	0.152152	0.350318	NOT	8	17	6	8	8	10	12	6
AGBL4	6.88057	-0.269967	0.814548	-0.331432	0.740318	0.864083	NOT	10	9	7	14	4	9	3	1
AGBL5	90.0232	0.0418931	0.350523	0.119516	0.904866	0.95538	NOT	79	194	150	73	65	78	44	88
AGER	13.1388	-0.418822	0.800858	-0.522966	0.600998	0.775362	NOT	3	10	27	36	13	9	7	3
AGFG1	415.104	0.514942	0.162861	3.16186	0.00156766	0.0152762	NOT	504	537	465	387	497	294	223	531
AGFG2	73.9296	0.203905	0.362722	0.562152	0.574012	0.757082	NOT	71	138	44	129	73	51	44	72
AGGF1	120.645	0.542435	0.241492	2.24618	0.0246922	0.106025	NOT	146	174	132	99	171	74	58	163
AGK	59.6258	-0.00579514	0.33037	-0.0175414	0.986005	0.992856	NOT	108	110	73	47	51	55	21	58
AGL	107.199	-0.488729	0.282489	-1.73008	0.0836152	0.242976	NOT	144	179	135	223	93	63	41	79
AGMAT	701.099	-0.181224	0.283165	-0.639997	0.522175	0.722263	NOT	730	1259	1433	667	699	332	317	748
AGMO	8.22268	0.967949	0.786439	1.2308	0.218398	0.437644	NOT	11	19	2	2	14	8	2	13
AGO1	285.497	0.338726	0.258667	1.30951	0.190363	0.401819	NOT	334	400	327	333	315	219	85	447
AGO2	18.9426	0.226218	0.451976	0.500509	0.616716	0.785893	NOT	29	35	20	16	25	8	8	27
AGO3	57.469	0.0830051	0.352092	0.235749	0.813628	0.907784	NOT	89	92	76	51	33	44	42	49
AGO4	78.1451	-0.0203662	0.310589	-0.0655729	0.947718	0.975803	NOT	89	122	131	91	80	34	32	110
AGPAT1	56.5071	1.4339	0.396186	3.61925	0.000295452	0.00440962	UP	51	31	27	57	51	69	29	113
AGPAT2	7722.64	0.95031	0.276328	3.43907	0.000583716	0.00727685	NOT	8859	7459	6044	6746	8511	10157	2795	10685
AGPAT3	325.01	-0.542128	0.26891	-2.01602	0.0437983	0.157636	NOT	626	614	427	480	247	238	67	303
AGPAT4	200.972	0.0529159	0.294761	0.179521	0.857528	0.930387	NOT	333	242	273	233	168	209	66	188
AGPAT5	76.3594	-0.00852633	0.334639	-0.0254792	0.979673	0.989838	NOT	167	137	75	59	72	57	25	92
AGPS	394.384	-0.0243702	0.236827	-0.102903	0.91804	0.961867	NOT	639	655	576	350	398	185	179	506
AGR2	495.386	-2.09197	0.445293	-4.69797	2.62759e-06	0.000124018	DOWN	2597	698	776	455	231	70	86	232
AGRN	1099.02	-0.615329	0.207758	-2.96175	0.00305893	0.0243621	NOT	2069	2246	1388	1710	724	717	437	713
AGT	36.0693	0.139529	0.621869	0.22437	0.822469	0.911781	NOT	117	33	9	37	49	11	13	58
AGTPBP1	22.5723	-0.004515	0.425664	-0.010607	0.991537	0.995612	NOT	33	37	37	20	25	14	6	30
AGTRAP	81.6345	-0.317328	0.263414	-1.20468	0.228329	0.448445	NOT	141	164	120	82	75	40	40	70
AGXT2	7.23159	-0.415688	1.34361	-0.30938	0.757032	0.874828	NOT	37	2	0	7	3	0	10	1
AHCTF1	148.238	-1.18972	0.246441	-4.82762	1.38176e-06	7.96271e-05	NOT	302	324	249	260	86	50	61	72
AHCY	494.627	0.558306	0.243772	2.29028	0.0220052	0.0980509	NOT	718	670	403	457	572	465	175	702
AHCYL1	875.925	0.341967	0.243403	1.40494	0.160038	0.360312	NOT	1327	1195	1066	718	1137	527	327	1285
AHCYL2	170.038	0.372817	0.465615	0.800697	0.423307	0.642948	NOT	298	117	313	76	219	54	89	280
AHDC1	41.0147	-0.536906	0.550853	-0.974683	0.329718	0.558691	NOT	49	74	21	119	22	39	16	18
AHI1	21.5769	0.31798	0.431132	0.737548	0.460789	0.674275	NOT	23	46	15	25	24	16	12	22
AHNAK	843.717	-0.326834	0.192541	-1.69748	0.0896062	0.253921	NOT	1353	1620	956	1296	699	581	354	645
AHNAK2	38.3906	-1.15404	0.482244	-2.39307	0.0167079	0.0814058	NOT	59	84	56	93	36	3	10	32
AHR	64.7006	0.0137732	0.309092	0.0445601	0.964458	0.983744	NOT	114	118	51	80	53	34	36	80
AHRR	186.569	0.9028	0.373057	2.42	0.0155203	0.0772135	NOT	122	115	277	170	212	169	152	174
AHSA1	450.017	-0.331889	0.213305	-1.55593	0.119724	0.303615	NOT	829	650	669	608	389	201	184	509
AHSA2	17.644	1.27439	0.635187	2.00633	0.0448212	0.160405	UP	19	3	18	14	28	9	20	15
AICDA	26.3823	0.458734	0.75666	0.606262	0.544341	0.737062	NOT	17	39	44	23	49	3	1	67
AIDA	402.182	-0.0052942	0.206448	-0.0256442	0.979541	0.989776	NOT	727	565	473	470	364	224	183	514
AIF1	212.245	0.898176	0.402037	2.23407	0.0254788	0.108565	NOT	237	145	304	114	265	80	197	300
AIFM1	183.15	-0.223374	0.227349	-0.982514	0.325847	0.554561	NOT	310	293	252	239	160	124	54	210
AIFM2	230.953	0.20078	0.279085	0.719421	0.471882	0.683102	NOT	273	346	286	280	212	250	74	233
AIFM3	20.5262	0.185963	0.573257	0.324398	0.745637	0.867491	NOT	18	46	37	7	11	18	13	22
AIG1	365.603	-0.973478	0.347524	-2.80118	0.00509158	0.0352162	NOT	918	680	590	510	368	83	67	348
AIMP1	446.745	-0.259226	0.173254	-1.49622	0.134597	0.326308	NOT	626	868	664	546	366	271	204	413
AIMP2	7.53639	0.273139	0.661638	0.412823	0.679736	0.827751	NOT	14	11	6	7	8	3	6	8
AIP	179.602	0.0707651	0.246781	0.286752	0.774302	0.884299	NOT	244	330	150	259	179	104	77	235
AJUBA	17.3707	0.556121	0.502651	1.10638	0.268564	0.495325	NOT	14	25	13	25	13	9	14	27
AK1	151.852	-1.01487	0.279609	-3.62962	0.000283839	0.00428684	NOT	242	322	220	335	127	48	37	120
AK2	1301.78	0.259368	0.193502	1.34039	0.18012	0.389044	NOT	1676	2011	1524	1380	1552	919	472	1714
AK3	368.988	1.38218	0.229403	6.02515	1.68954e-09	3.4097e-07	UP	303	266	322	229	511	282	232	704
AK4	22.3435	-0.537277	0.447375	-1.20095	0.229769	0.450131	NOT	28	38	27	50	16	15	9	15
AK6	77.4181	-0.402654	0.368389	-1.09301	0.274388	0.502143	NOT	72	126	184	92	59	47	38	55
AKAIN1	200.047	0.111332	0.242962	0.458229	0.646788	0.806966	NOT	297	333	254	194	185	138	68	292
AKAP1	15.3806	-0.528536	0.712232	-0.742085	0.458036	0.672163	NOT	31	43	13	19	11	0	5	29
AKAP10	28.6328	0.739433	0.41961	1.76219	0.0780367	0.232939	NOT	29	40	36	15	32	14	20	48
AKAP11	68.872	-0.0735001	0.294702	-0.249405	0.803048	0.902403	NOT	98	134	62	103	57	46	25	88
AKAP12	267.037	0.299583	0.332241	0.901704	0.367214	0.593622	NOT	328	439	123	446	280	169	153	315
AKAP13	313.7	0.152935	0.206142	0.741893	0.458152	0.672168	NOT	435	441	447	316	310	184	149	415
AKAP14	81.4775	-0.0354285	0.30454	-0.116335	0.907387	0.956471	NOT	77	124	110	136	74	63	38	70
AKAP17A	329.678	-0.558177	0.269137	-2.07395	0.038084	0.14443	NOT	411	623	524	586	197	243	130	220
AKAP2	139.345	0.489747	0.272083	1.79999	0.0718619	0.220799	NOT	184	192	91	179	138	87	82	208
AKAP3	29.9164	0.171843	0.453356	0.379045	0.704654	0.841969	NOT	26	51	48	32	40	11	9	50
AKAP5	20.4816	-0.240552	0.701406	-0.342957	0.731631	0.859018	NOT	12	34	65	8	25	4	14	14
AKAP6	20.2503	-0.680953	0.499773	-1.36252	0.173032	0.37872	NOT	34	39	19	44	14	5	13	14
AKAP7	111.472	0.287599	0.301974	0.952394	0.340897	0.56973	NOT	151	163	88	155	99	120	44	113
AKAP8L	462.907	-0.113081	0.239487	-0.47218	0.636798	0.798779	NOT	514	666	762	663	357	341	217	438
AKAP9	267.084	-0.247337	0.249736	-0.990395	0.321981	0.550714	NOT	304	626	399	301	224	194	95	253
AKIP1	149.115	0.53392	0.236841	2.25434	0.0241747	0.104479	NOT	202	199	148	134	195	104	59	225
AKIRIN1	62.5748	2.09041	0.433038	4.82732	1.38383e-06	7.96271e-05	UP	38	21	13	56	75	65	53	119
AKIRIN2	154.364	0.536899	0.246289	2.17996	0.0292606	0.120219	NOT	174	174	176	164	167	84	110	203
AKNA	156.047	0.387786	0.304239	1.27461	0.202447	0.41696	NOT	212	147	256	120	187	106	69	211
AKR1A1	1791.72	-0.479556	0.275881	-1.73827	0.082163	0.24056	NOT	3237	3577	2676	2170	1815	589	502	2230
AKR1B1	68.3898	0.211536	0.268609	0.787524	0.430975	0.649342	NOT	92	91	86	78	76	40	43	65
AKR1C1	37.6223	-0.913952	0.78695	-1.16139	0.245485	0.469429	NOT	180	12	71	10	37	3	13	35
AKR1CL1	203.438	-0.268185	0.427673	-0.62708	0.530607	0.728382	NOT	489	145	396	175	219	67	66	279
AKR1E2	795.809	0.111922	0.230456	0.485656	0.627211	0.792695	NOT	1003	1167	1173	865	1007	393	325	1007
AKR7A2	726.216	1.72913	0.316911	5.4562	4.86435e-08	4.98059e-06	UP	472	337	512	489	1299	502	337	1704
AKT1	678.104	0.39166	0.227366	1.7226	0.0849618	0.245608	NOT	823	1032	515	900	775	500	278	951
AKT1S1	316.004	-0.247448	0.206212	-1.19997	0.230151	0.4505	NOT	460	585	391	466	333	148	153	268
AKT2	376.45	0.00729735	0.252929	0.0288513	0.976983	0.989252	NOT	619	676	332	486	372	313	114	414
AKT3	124.894	0.899435	0.292444	3.07558	0.00210093	0.018838	NOT	128	144	74	136	149	123	94	111
AKTIP	34.6834	-0.283912	0.422526	-0.67194	0.501622	0.706661	NOT	61	45	49	50	24	12	28	25
ALAD	242.177	-0.196298	0.24074	-0.815396	0.414846	0.636614	NOT	369	411	406	248	250	159	74	249
ALAS1	182.323	0.520749	0.22218	2.34381	0.0190876	0.0892319	NOT	191	208	200	217	195	119	119	230
ALCAM	128.307	-0.512728	0.223661	-2.29244	0.0218805	0.0977813	NOT	247	247	162	185	103	54	56	119
ALDH16A1	225.027	-0.465112	0.189124	-2.45929	0.0139211	0.0723057	NOT	359	462	338	292	165	135	95	184
ALDH18A1	800.968	-0.402648	0.263484	-1.52817	0.12647	0.314164	NOT	1129	1989	1294	752	752	481	217	809
ALDH1A1	3053.8	-0.19444	0.369342	-0.526449	0.598576	0.773781	NOT	8109	3934	3905	2323	3641	1028	940	4234
ALDH1A2	45.8906	0.866434	0.425542	2.03607	0.0417431	0.153274	NOT	49	20	61	43	48	37	23	84
ALDH1A3	423.862	1.01621	0.29501	3.44465	0.000571794	0.00716027	NOT	495	240	457	322	570	290	247	736
ALDH1B1	326.05	0.906521	0.202722	4.47174	7.75873e-06	0.000288878	NOT	352	408	246	268	447	226	173	543
ALDH1L1	9.95372	-0.276615	0.792769	-0.348922	0.727148	0.855775	NOT	21	11	19	9	3	13	0	13
ALDH1L2	43.0865	0.0776117	0.336198	0.230851	0.81743	0.909591	NOT	64	53	49	62	33	39	21	40
ALDH2	228.912	0.494544	0.217326	2.27558	0.0228709	0.100733	NOT	284	339	250	190	318	141	134	249
ALDH3A2	874.55	0.314837	0.204785	1.5374	0.124194	0.310486	NOT	1106	1365	1088	787	981	775	349	960
ALDH3B1	108.764	0.848907	0.295841	2.86947	0.00411163	0.0302773	NOT	115	179	74	78	139	98	42	182
ALDH4A1	22.5177	-0.994591	0.544923	-1.8252	0.0679715	0.212563	NOT	35	39	16	72	15	6	9	17
ALDH5A1	200.875	-1.15299	0.524048	-2.20016	0.0277954	0.116023	NOT	221	609	640	83	168	50	29	193
ALDH6A1	185.621	0.817874	0.233079	3.509	0.000449788	0.00604565	NOT	215	215	156	163	267	104	108	292
ALDH7A1	244.194	-0.274629	0.241493	-1.13721	0.255449	0.480294	NOT	379	403	295	398	232	97	99	294
ALDH9A1	1425.11	0.543292	0.23448	2.31701	0.0205031	0.0937312	NOT	2130	1598	1456	1247	1821	770	714	2266
ALDOA	4688.52	-0.457028	0.208063	-2.19659	0.0280499	0.116735	NOT	8102	8454	5165	8290	4226	2017	1776	4739
ALDOB	6115.28	1.04414	0.314389	3.32118	0.000896367	0.0100337	NOT	3860	10724	4455	3916	7836	7395	2369	8724
ALDOC	53.265	-1.70143	0.450725	-3.77487	0.00016009	0.00277616	DOWN	119	139	44	153	20	22	5	35
ALG1	35.962	0.341954	0.395822	0.863909	0.387638	0.613184	NOT	52	73	31	26	39	39	14	32
ALG10	22.0186	-1.06884	0.436788	-2.44703	0.0144037	0.0739554	NOT	44	55	41	29	14	10	3	20
ALG11	28.5262	0.0926655	0.396003	0.234002	0.814983	0.908546	NOT	51	56	31	19	25	18	16	32
ALG12	347.616	-0.728649	0.208141	-3.50075	0.000463943	0.00615218	NOT	597	676	681	437	277	166	127	243
ALG13	62.1907	-1.17298	0.4231	-2.77234	0.00556543	0.0374512	NOT	100	161	123	91	14	34	30	26
ALG14	101.631	0.288513	0.288114	1.00138	0.316641	0.544887	NOT	114	180	118	100	69	96	47	133
ALG2	56.698	-0.0247149	0.321624	-0.0768441	0.938748	0.972189	NOT	100	113	65	47	46	48	21	61
ALG3	70.0279	-0.691719	0.288933	-2.39404	0.0166637	0.0812189	NOT	144	128	96	109	37	46	27	51
ALG5	41.0932	-0.720016	0.374213	-1.92408	0.0543445	0.182657	NOT	79	77	72	58	38	21	5	41
ALG6	33.5866	-1.22977	0.485099	-2.53509	0.011242	0.0623932	DOWN	82	102	64	23	25	5	10	26
ALG8	54.9378	-0.586269	0.306173	-1.91483	0.0555143	0.185737	NOT	91	104	93	77	58	20	21	41
ALG9	76.6509	-0.433357	0.307287	-1.41027	0.15846	0.358128	NOT	146	139	130	74	63	28	41	69
ALKAL2	11.3669	0.398995	0.710171	0.56183	0.574232	0.757082	NOT	19	16	19	1	16	5	8	11
ALKBH1	66.0654	-0.14894	0.354344	-0.420326	0.674247	0.823684	NOT	85	150	96	60	52	64	27	43
ALKBH3	64.4042	0.22918	0.322947	0.709652	0.47792	0.68793	NOT	77	107	72	75	77	22	36	91
ALKBH4	183.968	-0.638998	0.197294	-3.23882	0.00120027	0.0124451	NOT	302	356	279	300	130	106	60	155
ALKBH5	484.053	0.20017	0.22002	0.909782	0.362938	0.589934	NOT	700	792	446	584	528	430	180	495
ALKBH6	143.743	-0.411046	0.20656	-1.98996	0.0465954	0.164514	NOT	245	250	219	193	118	68	61	142
ALKBH7	113.675	-0.167601	0.210793	-0.795096	0.426558	0.645608	NOT	176	193	161	136	100	66	53	115
ALKBH8	39.8729	-0.801442	0.381667	-2.09985	0.0357424	0.138716	NOT	60	95	53	73	39	13	18	19
ALMS1	53.4935	-0.401039	0.336523	-1.19171	0.233373	0.454507	NOT	68	101	87	81	56	37	11	46
ALOX12	28.3302	-0.879657	0.592228	-1.48533	0.137455	0.330581	NOT	17	38	82	56	25	4	9	29
ALOX15	20.7113	0.485361	0.826202	0.58746	0.556895	0.74472	NOT	59	10	16	11	4	46	6	9
ALOX5	16.9044	1.22082	0.673911	1.81155	0.070056	0.216785	NOT	7	21	22	7	38	3	7	37
ALOX5AP	17.0996	-0.0296504	0.511215	-0.0579998	0.953749	0.978051	NOT	16	28	25	24	11	17	10	10
ALPK1	59.7717	-0.172004	0.343221	-0.501147	0.616268	0.78571	NOT	82	151	85	43	54	35	31	52
ALPL	13.2185	-0.71078	0.804414	-0.8836	0.376912	0.603206	NOT	9	15	9	52	2	13	4	10
ALS2	40.8042	0.0466538	0.360142	0.129543	0.896928	0.951373	NOT	45	63	60	51	37	40	18	29
ALS2CL	486.862	-0.338261	0.261581	-1.29314	0.195963	0.409296	NOT	544	978	949	528	453	249	234	384
ALYREF	315.477	-0.0256683	0.221558	-0.115854	0.907768	0.95654	NOT	466	476	336	477	346	147	156	347
AMACR	29.6369	1.67791	0.414416	4.04886	5.14672e-05	0.00119248	UP	21	15	21	19	27	26	29	53
AMBN	23.6283	2.36125	0.592308	3.98653	6.70467e-05	0.00144301	UP	26	10	7	1	35	26	21	39
AMBRA1	197.546	-0.153167	0.2237	-0.684697	0.493535	0.701059	NOT	298	341	276	236	203	97	111	160
AMCF-II	38.5683	1.12822	0.537753	2.09802	0.0359033	0.138978	NOT	24	24	56	26	80	13	13	84
AMD1	220.335	1.11809	0.266303	4.19855	2.6863e-05	0.000727756	NOT	177	210	183	193	296	113	164	393
AMDHD1	8.1356	-1.03044	0.877764	-1.17394	0.240421	0.463116	NOT	8	9	10	29	1	1	6	7
AMDHD2	947.838	0.0128427	0.243746	0.052689	0.95798	0.980368	NOT	1463	1107	1566	1002	1154	543	374	1020
AMER1	57.7161	0.261593	0.299263	0.874124	0.382051	0.608772	NOT	72	70	84	60	69	41	32	51
AMFR	123.571	-0.608692	0.225361	-2.70097	0.00691375	0.0435432	NOT	245	241	181	164	86	78	42	97
AMH	9.27758	-0.312792	0.843936	-0.370635	0.710909	0.846393	NOT	8	33	10	10	19	0	2	9
AMIGO1	10.0975	-1.14036	0.747038	-1.52651	0.126884	0.314892	NOT	6	37	11	25	8	1	3	9
AMIGO2	36.822	-1.59007	0.703814	-2.25922	0.0238698	0.103545	DOWN	64	109	21	113	18	0	20	14
AMMECR1	141.367	-0.499693	0.253227	-1.9733	0.0484619	0.169113	NOT	226	287	237	170	77	81	57	149
AMMECR1L	116.504	0.220651	0.243703	0.905409	0.365249	0.591818	NOT	160	186	148	108	139	60	56	151
AMN	456.414	-0.2136	0.391397	-0.545738	0.585246	0.763685	NOT	731	942	573	513	251	583	104	319
AMN1	112.039	-0.101136	0.217062	-0.465933	0.641264	0.802372	NOT	152	188	142	159	99	70	48	124
AMOT	127.348	-0.143604	0.254	-0.565369	0.571823	0.75597	NOT	173	204	155	200	106	59	76	128
AMOTL1	49.136	-0.483576	0.382666	-1.2637	0.206337	0.421483	NOT	63	84	45	119	38	25	23	39
AMOTL2	92.3877	0.302257	0.314234	0.961885	0.336108	0.565185	NOT	133	147	56	126	77	62	63	104
AMPD2	434.577	-0.282861	0.177043	-1.5977	0.11011	0.289014	NOT	789	830	541	518	408	240	163	445
AMPD3	112.328	0.401105	0.268082	1.4962	0.134601	0.326308	NOT	164	145	141	89	108	91	46	167
AMT	106.383	-0.285758	0.315775	-0.904943	0.365496	0.592012	NOT	208	246	140	75	97	47	50	109
AMZ2	504.191	0.1131	0.187067	0.604593	0.545449	0.737201	NOT	717	799	680	495	473	404	229	515
ANAPC1	182.149	-0.356013	0.251129	-1.41765	0.156293	0.355559	NOT	232	350	324	219	141	111	92	133
ANAPC10	15.4732	0.482425	0.476531	1.01237	0.311362	0.539604	NOT	16	19	19	16	19	9	12	14
ANAPC11	701.508	-0.93133	0.193574	-4.81123	1.50007e-06	8.32209e-05	NOT	1424	1702	1082	969	580	294	184	502
ANAPC13	115.325	0.741359	0.306565	2.41827	0.0155943	0.0775253	NOT	103	139	137	96	161	49	83	165
ANAPC15	302.519	-0.701009	0.177812	-3.94241	8.06677e-05	0.00166168	NOT	527	643	488	424	245	141	115	215
ANAPC16	326.419	0.13093	0.235027	0.557084	0.57747	0.758825	NOT	593	454	330	358	285	174	198	397
ANAPC2	245.421	-0.641382	0.279828	-2.29206	0.0219023	0.0978422	NOT	360	416	305	545	171	167	81	166
ANAPC4	287.538	-0.485917	0.297755	-1.63193	0.102693	0.276811	NOT	330	470	630	382	201	144	156	205
ANAPC5	68.4669	-0.924137	0.354659	-2.60571	0.00916851	0.0534964	NOT	92	155	127	115	29	29	38	38
ANAPC7	204.407	-0.731447	0.218364	-3.34967	0.000809068	0.00931097	NOT	343	402	309	354	160	71	77	182
ANG	66.0866	-0.620611	0.315418	-1.96758	0.0491163	0.170566	NOT	125	110	131	76	61	23	23	62
ANGEL2	127.811	-0.903302	0.31869	-2.83442	0.00459087	0.0326663	NOT	168	328	284	146	97	39	53	87
ANGPT2	17.2768	0.298247	0.512639	0.581787	0.56071	0.747524	NOT	28	27	12	20	11	7	12	30
ANGPT4	10.3371	-0.379183	0.644511	-0.588327	0.556313	0.744513	NOT	27	14	6	18	5	7	4	12
ANGPTL1	20.5023	-0.716462	0.651735	-1.09932	0.271631	0.498807	NOT	41	47	19	34	7	16	14	2
ANGPTL2	132.143	-0.868234	0.384562	-2.25772	0.0239632	0.103823	NOT	178	349	95	329	71	67	59	76
ANGPTL4	770.79	1.66195	0.309403	5.37148	7.80934e-08	7.20166e-06	UP	363	694	307	682	1100	842	691	800
ANGPTL6	17.7284	0.374116	0.504284	0.741877	0.458162	0.672168	NOT	35	17	19	14	12	10	13	26
ANGPTL7	11.8055	-1.77175	0.675803	-2.62169	0.00874954	0.0514951	DOWN	22	22	15	39	6	6	2	2
ANK2	98.8912	0.266251	0.315908	0.842812	0.399334	0.623399	NOT	115	179	67	141	81	91	56	93
ANK3	460.513	0.173817	0.217882	0.797756	0.425012	0.644203	NOT	533	678	687	480	434	395	201	484
ANKDD1A	7.59515	0.616075	0.770624	0.79945	0.42403	0.643609	NOT	9	12	12	1	9	10	2	8
ANKFY1	28.1175	0.169472	0.512037	0.330975	0.740663	0.864159	NOT	64	26	44	12	23	14	19	35
ANKH	937.041	-0.631121	0.466893	-1.35175	0.176456	0.38381	NOT	2507	517	2093	988	894	278	196	1226
ANKHD1	155.605	0.135308	0.261402	0.517626	0.60472	0.777608	NOT	175	277	235	139	127	118	68	201
ANKIB1	115.636	-0.301178	0.250074	-1.20435	0.228453	0.448593	NOT	162	206	152	180	86	59	67	98
ANKLE1	36.0382	-0.476771	0.42964	-1.1097	0.267129	0.494519	NOT	68	65	60	43	43	11	6	46
ANKLE2	105.338	-0.309529	0.278674	-1.11072	0.266689	0.493936	NOT	148	246	128	134	73	86	42	83
ANKMY2	84.9198	0.801586	0.396437	2.02197	0.043179	0.156336	NOT	95	86	89	69	103	25	88	104
ANKRA2	23.7898	0.783989	0.437727	1.79105	0.0732857	0.223648	NOT	29	31	28	10	27	26	12	28
ANKRD10	614.444	-0.841553	0.380061	-2.21426	0.0268111	0.112805	NOT	902	1593	1064	852	236	384	341	203
ANKRD11	574.401	-0.0893012	0.23558	-0.379069	0.704636	0.841969	NOT	786	1004	829	663	419	518	216	554
ANKRD12	257.149	0.360658	0.198378	1.81803	0.0690589	0.214797	NOT	350	336	255	304	250	220	117	321
ANKRD13A	839.545	-0.152997	0.270956	-0.564655	0.572309	0.756271	NOT	1069	1322	1672	778	931	477	286	908
ANKRD13B	71.1695	0.130213	0.333567	0.390365	0.696267	0.838241	NOT	93	120	53	111	53	69	34	67
ANKRD13C	110.57	0.424115	0.233925	1.81303	0.0698265	0.216411	NOT	161	153	114	98	118	68	71	135
ANKRD13D	122.891	0.409317	0.281057	1.45635	0.145297	0.340441	NOT	128	179	139	136	97	136	60	128
ANKRD16	45.6228	-0.0925804	0.433333	-0.213647	0.830822	0.917317	NOT	25	83	54	93	40	33	23	37
ANKRD17	252.071	-0.192489	0.256276	-0.751101	0.452592	0.666985	NOT	345	410	380	344	238	95	106	335
ANKRD22	13.9959	0.028388	0.803137	0.0353464	0.971804	0.9869	NOT	35	11	23	8	30	0	5	15
ANKRD24	137.345	0.361495	0.315212	1.14683	0.251451	0.475613	NOT	115	148	238	144	145	122	65	146
ANKRD27	200.828	-0.270093	0.298177	-0.905813	0.365035	0.591673	NOT	228	399	388	198	130	157	84	180
ANKRD28	158.114	-0.0416805	0.245367	-0.16987	0.865113	0.933993	NOT	239	296	225	139	127	125	68	161
ANKRD29	26.9817	-0.423725	0.434278	-0.9757	0.329213	0.558214	NOT	43	69	19	44	16	18	12	24
ANKRD33B	9.00499	-0.864919	1.01763	-0.849937	0.39536	0.619637	NOT	30	10	8	15	7	0	9	0
ANKRD35	53.2409	-0.590669	0.355927	-1.65953	0.09701	0.266495	NOT	72	68	106	97	35	31	16	53
ANKRD37	31.0435	0.249713	0.435134	0.573877	0.566051	0.751778	NOT	56	56	31	19	22	15	19	51
ANKRD39	91.4316	1.0796	0.352495	3.06274	0.0021932	0.0193907	NOT	120	123	49	45	83	112	61	113
ANKRD40	204.071	-0.0407477	0.207886	-0.196009	0.844603	0.923909	NOT	256	395	284	219	177	130	104	209
ANKRD42	50.7632	-0.743914	0.405572	-1.83423	0.0666193	0.209976	NOT	97	130	70	66	52	9	13	57
ANKRD44	28.826	0.494779	0.464906	1.06426	0.287213	0.514486	NOT	49	52	19	18	31	10	21	45
ANKRD46	182.347	0.654497	0.255027	2.56639	0.0102764	0.0581937	NOT	190	232	121	239	222	138	120	202
ANKRD49	136.85	-0.0564231	0.248605	-0.226959	0.820456	0.91095	NOT	188	259	165	167	163	62	74	120
ANKRD50	51.9892	-0.270956	0.343177	-0.789554	0.429788	0.648267	NOT	75	90	60	89	30	41	16	62
ANKRD52	20.3883	0.390881	0.478835	0.816318	0.414318	0.636235	NOT	32	15	25	23	16	10	15	30
ANKRD54	78.0423	0.143959	0.272807	0.527695	0.597711	0.773237	NOT	75	144	86	107	82	50	39	86
ANKRD6	103.721	1.11519	0.292383	3.81413	0.000136662	0.00245869	NOT	91	134	100	45	133	103	57	156
ANKRD63	10.4179	1.06216	0.717973	1.47938	0.139038	0.332208	NOT	4	8	20	4	17	4	8	16
ANKRD65	14.1171	0.414933	0.564977	0.734424	0.46269	0.675918	NOT	26	18	11	12	19	6	13	9
ANKRD9	185.559	0.339602	0.329248	1.03145	0.302331	0.530078	NOT	375	255	134	166	248	110	61	284
ANKS1A	290.954	0.192323	0.212736	0.904046	0.365971	0.592506	NOT	320	447	363	365	298	251	129	281
ANKS1B	6.81144	-0.970271	0.951322	-1.01992	0.307767	0.535975	NOT	11	22	8	11	10	5	0	0
ANKS3	32.2958	-0.895124	0.437554	-2.04574	0.0407815	0.150712	NOT	54	79	53	48	34	6	15	15
ANKS4B	639.779	0.28193	0.211271	1.33445	0.182057	0.391346	NOT	709	813	902	727	705	437	270	863
ANKS6	8.51108	0.0330449	0.784726	0.0421101	0.966411	0.984266	NOT	7	23	11	7	8	0	7	12
ANKZF1	12.3019	0.969848	0.743565	1.30432	0.192124	0.403884	NOT	10	15	17	5	26	1	4	29
ANLN	44.9242	-0.559527	0.490163	-1.14151	0.253657	0.478356	NOT	133	96	22	55	33	20	28	23
ANO1	77.8364	-1.13341	0.553803	-2.0466	0.0406977	0.150482	NOT	112	269	45	181	16	30	50	29
ANO10	275.232	-0.208752	0.229516	-0.909533	0.363069	0.589934	NOT	424	456	313	439	317	170	89	249
ANO6	153.084	0.865593	0.441543	1.96038	0.0499509	0.172341	NOT	137	244	86	148	131	276	63	97
ANO7	29.3714	-0.0656024	0.427966	-0.153289	0.87817	0.94129	NOT	48	43	34	39	20	31	15	16
ANO8	33.8904	-0.487683	0.497572	-0.980125	0.327024	0.556021	NOT	49	93	23	62	48	19	5	23
ANO9	238.064	-0.587902	0.315467	-1.86359	0.0623788	0.200298	NOT	352	501	534	200	167	151	63	229
ANP32A	494.373	0.06388	0.209917	0.304311	0.760891	0.876583	NOT	760	695	648	563	510	230	273	581
ANP32B	839.932	0.573028	0.157007	3.6497	0.000262549	0.00403491	NOT	1046	1187	717	826	943	612	513	1048
ANP32E	232.932	0.0621123	0.258336	0.240432	0.809995	0.906104	NOT	372	338	260	292	288	90	130	248
ANPEP	13911.3	0.659479	0.706062	0.934025	0.350291	0.578424	NOT	13981	22507	16853	7538	10699	25984	3181	10418
ANTXR1	98.8112	-0.163648	0.296269	-0.552362	0.5807	0.760753	NOT	164	191	79	151	84	44	56	104
ANTXR2	325.34	-0.723104	0.320469	-2.25639	0.0240461	0.10415	NOT	467	729	355	690	197	228	133	149
ANXA1	320.652	1.12303	0.295301	3.80298	0.000142965	0.00253996	NOT	326	342	132	326	396	218	275	444
ANXA11	741.298	0.533548	0.155248	3.43673	0.000588772	0.00732404	NOT	870	999	672	819	809	533	429	973
ANXA13	1033.03	0.0661607	0.211534	0.312766	0.754458	0.873407	NOT	1552	1598	1384	1070	1179	508	429	1366
ANXA2	3176.44	0.133992	0.2335	0.573841	0.566075	0.751778	NOT	5059	4130	4289	3220	3853	1485	1385	4252
ANXA4	474.77	1.21818	0.371058	3.28299	0.00102711	0.0110104	UP	539	203	476	317	703	212	346	904
ANXA5	381.299	0.967195	0.240439	4.02262	5.75536e-05	0.00128435	NOT	414	308	281	405	469	254	259	614
ANXA6	229.94	0.264384	0.338855	0.780228	0.435257	0.652206	NOT	341	281	138	387	228	106	165	264
ANXA7	177.374	0.426981	0.228029	1.87248	0.0611399	0.197738	NOT	212	209	173	235	213	105	98	231
ANXA8	37.7837	-0.154609	0.516442	-0.299373	0.764656	0.878464	NOT	37	56	27	94	23	43	15	22
ANXA9	26.8442	-1.10652	0.483783	-2.28723	0.0221826	0.0984638	NOT	33	45	67	51	9	18	6	19
AOAH	12.677	-0.103144	0.931991	-0.110671	0.911878	0.958549	NOT	23	9	38	1	10	11	0	22
AOC1	5009.22	0.0505154	0.319107	0.158302	0.874219	0.939168	NOT	7153	6628	7637	5510	3786	5963	1620	3935
AP1AR	14.4693	2.18437	0.924244	2.36342	0.0181072	0.0860851	UP	17	11	1	2	31	0	13	37
AP1B1	654.834	-0.139243	0.21919	-0.635261	0.525259	0.7249	NOT	1200	972	887	747	660	386	210	798
AP1G1	324.758	0.121337	0.249971	0.485405	0.627389	0.792747	NOT	487	517	429	305	358	167	119	491
AP1G2	47.0073	-0.468197	0.321039	-1.45838	0.144736	0.339816	NOT	97	103	49	59	37	30	19	35
AP1M1	329.313	0.070735	0.185712	0.380885	0.703288	0.841042	NOT	501	590	361	355	348	232	129	370
AP1M2	203.296	0.218327	0.201757	1.08213	0.279197	0.507018	NOT	244	329	269	202	194	156	95	240
AP1S1	362.904	0.830893	0.246108	3.37614	0.000735108	0.00862254	NOT	395	359	258	423	563	229	195	528
AP1S2	74.9042	0.959082	0.279018	3.43735	0.000587434	0.00731665	NOT	93	80	55	56	70	67	48	123
AP1S3	73.7244	0.00325154	0.403582	0.00805669	0.993572	0.996578	NOT	165	58	81	96	83	45	47	42
AP2A1	1300.52	-0.437689	0.235615	-1.85765	0.0632191	0.202002	NOT	2202	2537	1842	1750	963	1011	338	1187
AP2A2	858.256	-0.637515	0.217993	-2.92448	0.00345034	0.0266014	NOT	1240	1480	1707	1265	653	512	267	677
AP2B1	302.028	0.534458	0.215187	2.4837	0.0130027	0.0691871	NOT	400	388	267	318	397	166	164	430
AP2M1	464.896	1.0714	0.262133	4.08723	4.36552e-05	0.00105355	NOT	478	392	363	413	686	250	267	894
AP2S1	615.594	0.280207	0.21156	1.32448	0.185343	0.39519	NOT	1033	919	512	661	708	459	259	737
AP3B1	157.78	0.324377	0.225391	1.43917	0.150101	0.347318	NOT	258	194	173	152	180	97	87	188
AP3D1	500.541	0.249779	0.166167	1.50318	0.132793	0.324071	NOT	638	740	576	575	484	410	249	532
AP3M1	173.245	0.421917	0.217364	1.94106	0.0522511	0.178114	NOT	246	230	179	171	192	114	78	262
AP3M2	16.1194	0.826514	0.601472	1.37415	0.169395	0.37359	NOT	16	38	3	12	18	11	10	27
AP3S1	241.758	1.03237	0.276322	3.73612	0.000186879	0.0031154	NOT	318	192	177	189	264	152	201	379
AP3S2	359.721	0.0492018	0.203822	0.241396	0.809248	0.906023	NOT	525	676	426	363	320	288	141	403
AP4B1	217.551	-0.341018	0.286334	-1.19098	0.233661	0.454813	NOT	294	322	450	256	220	88	82	238
AP4E1	31.8807	0.365784	0.42638	0.857882	0.390957	0.615599	NOT	53	48	31	26	22	32	9	54
AP4M1	168.535	-0.230144	0.214765	-1.07161	0.283896	0.51152	NOT	224	350	239	204	154	115	64	153
AP4S1	58.6396	-0.459495	0.373951	-1.22876	0.219163	0.438547	NOT	81	75	74	136	65	25	18	54
AP5B1	216.14	-0.230485	0.298795	-0.771384	0.440479	0.656251	NOT	303	274	468	217	226	108	90	211
AP5M1	131.693	0.17597	0.263847	0.66694	0.504811	0.708475	NOT	182	223	170	115	95	81	83	167
AP5S1	19.2283	0.461493	0.479127	0.963195	0.33545	0.564284	NOT	16	24	32	17	21	11	8	34
AP5Z1	455.777	0.00717457	0.205887	0.0348471	0.972202	0.986972	NOT	565	692	716	520	465	246	238	479
APAF1	250.756	-0.669421	0.262833	-2.54694	0.0108672	0.0608224	NOT	334	739	395	283	170	140	92	195
APBA1	11.0071	0.750224	0.661597	1.13396	0.256811	0.481874	NOT	11	21	2	13	11	5	9	18
APBA3	84.7857	0.258594	0.290273	0.890868	0.373	0.599426	NOT	107	108	125	84	90	40	45	123
APBB1	53.5407	-0.359446	0.418025	-0.859869	0.389861	0.614888	NOT	74	101	33	124	40	21	26	61
APBB1IP	23.6981	0.980323	0.41867	2.34152	0.0192056	0.0895148	NOT	26	21	14	26	22	19	19	35
APBB2	88.6864	-0.109053	0.280344	-0.388998	0.697278	0.838288	NOT	154	166	84	112	87	67	42	62
APBB3	27.5852	0.0173982	0.4172	0.0417022	0.966736	0.984266	NOT	30	52	39	30	19	28	14	20
APC	80.4905	0.475851	0.261691	1.81837	0.0690078	0.214734	NOT	91	126	94	64	87	54	54	91
APCDD1	42.618	-0.657808	0.364672	-1.80383	0.0712573	0.219523	NOT	103	60	65	57	31	20	22	25
APEH	281.54	-0.41138	0.214863	-1.91462	0.0555412	0.185737	NOT	448	554	425	363	268	189	82	230
APEX1	154.689	0.325551	0.300304	1.08407	0.278333	0.505977	NOT	208	269	162	135	173	56	108	202
APEX2	46.3287	-0.514334	0.317991	-1.61745	0.105782	0.282186	NOT	81	87	69	64	30	17	24	47
APH1A	448.841	0.186478	0.304499	0.612409	0.540267	0.734331	NOT	787	671	524	373	412	496	134	450
APH1B	23.056	0.551043	0.545126	1.01085	0.312086	0.540343	NOT	31	19	18	33	16	38	8	18
API5	483.935	0.231746	0.21647	1.07057	0.284364	0.511995	NOT	658	663	484	652	499	290	204	721
APIP	67.4434	1.15988	0.282697	4.10291	4.07982e-05	0.0010002	NOT	72	78	43	42	89	46	51	106
APITD1	31.7439	-0.872419	0.428621	-2.03541	0.0418095	0.153274	NOT	63	82	47	37	13	11	20	20
APLF	152.439	0.326862	0.322321	1.01409	0.31054	0.538918	NOT	199	264	222	77	165	137	71	151
APLN	8.27081	-0.935651	0.936222	-0.99939	0.317606	0.545873	NOT	29	15	5	14	9	0	0	13
APLNR	48.7801	-1.13007	0.459412	-2.45982	0.0139007	0.0722267	NOT	119	110	35	112	38	30	6	24
APLP1	68.3108	-0.548667	0.502895	-1.09102	0.275265	0.502829	NOT	107	152	20	174	46	25	30	75
APLP2	574.739	0.03024	0.333028	0.0908029	0.927649	0.966637	NOT	1130	885	662	516	414	666	168	527
APMAP	204.859	-0.0670746	0.240643	-0.278731	0.780451	0.888109	NOT	396	365	227	198	222	129	72	226
APOA4	25680.4	-0.0220783	0.754486	-0.0292627	0.976655	0.9892	NOT	25000	29223	53262	30558	14142	41487	3516	16127
APOB	7544.65	0.699075	0.696186	1.00415	0.315306	0.543911	NOT	5003	9512	10982	5899	4603	15370	1659	5424
APOBEC1	76.8131	0.940352	0.529917	1.77453	0.075976	0.229096	NOT	60	27	150	38	110	35	41	155
APOBEC3B	44.6385	0.300634	0.43194	0.69601	0.486423	0.695282	NOT	42	36	80	54	36	20	28	72
APOBR	30.6847	0.462983	0.491797	0.94141	0.346495	0.575304	NOT	38	43	35	29	71	9	10	34
APOC3	13476.7	-0.375534	0.450126	-0.834285	0.404121	0.627583	NOT	9277	34342	27767	13494	10163	13998	1908	11156
APOD	11.2007	-1.54698	0.728786	-2.12268	0.0337805	0.133596	DOWN	19	42	11	22	7	2	6	1
APOE	525.621	-0.83228	0.309858	-2.686	0.0072312	0.0450535	NOT	1605	833	573	757	343	270	119	507
APOF	10.8147	-1.74678	0.69422	-2.51618	0.0118636	0.0649374	DOWN	30	33	19	12	5	0	5	5
APOLD1	25.3324	-0.297501	0.506745	-0.587082	0.557148	0.74472	NOT	29	55	18	52	11	23	13	18
APOM	36.0895	-0.925655	0.430325	-2.15106	0.0314714	0.126842	NOT	53	75	96	34	22	12	17	24
APOO	46.7883	0.236629	0.311834	0.758831	0.447953	0.663019	NOT	71	62	55	51	42	34	18	70
APOOL	64.6218	1.05771	0.364136	2.90472	0.00367587	0.0277735	NOT	82	42	72	33	98	45	49	77
APOPT1	501.715	-0.123456	0.178032	-0.693449	0.488028	0.696503	NOT	855	917	527	633	434	344	223	486
APP	496.068	0.0301819	0.247996	0.121703	0.903134	0.955121	NOT	731	683	470	809	420	432	200	496
APPBP2	157.62	-0.119795	0.211394	-0.566692	0.570924	0.755499	NOT	259	280	181	194	150	89	86	136
APPL1	17.0151	1.28668	0.590151	2.18025	0.0292386	0.120184	UP	26	17	3	10	15	15	18	21
APPL2	73.0292	0.197614	0.302857	0.6525	0.514079	0.715783	NOT	79	104	113	79	80	47	25	106
APRT	381.768	-0.505365	0.191907	-2.63339	0.00845378	0.0503502	NOT	668	774	444	614	324	225	125	325
APTX	72.8963	-0.0269582	0.3874	-0.0695875	0.944522	0.97491	NOT	127	120	125	41	93	55	19	69
AQP1	430.311	-1.00478	0.374006	-2.68655	0.00721952	0.0450209	NOT	675	1518	296	823	218	282	103	275
AQP10	260.838	0.283438	0.847244	0.334541	0.737971	0.862608	NOT	54	952	90	312	238	325	100	190
AQP11	60.9902	0.295253	0.395944	0.745692	0.455853	0.67016	NOT	102	83	82	39	53	75	18	62
AQP3	29.8461	3.04974	0.824795	3.69758	0.000217667	0.00351626	UP	9	4	11	10	28	100	12	3
AQP7	53.7916	0.776181	0.547209	1.41844	0.156064	0.355212	NOT	41	132	38	24	58	89	10	55
AQP8	156.938	1.22376	0.353588	3.46098	0.000538207	0.00686942	UP	52	174	145	143	266	109	107	216
AQR	46.0355	-0.192408	0.345552	-0.556813	0.577655	0.758882	NOT	60	56	85	63	37	23	24	49
ARAF	298.145	0.297183	0.257417	1.15448	0.248303	0.472758	NOT	380	555	221	359	368	246	108	337
ARAP1	376.057	0.268708	0.202617	1.32618	0.184779	0.394993	NOT	518	517	406	448	391	271	144	534
ARAP2	52.5621	0.238348	0.349488	0.681993	0.495243	0.702144	NOT	82	80	75	34	54	45	17	68
ARAP3	72.5133	-0.420786	0.364668	-1.15389	0.248546	0.472815	NOT	71	109	109	158	61	48	18	74
ARCN1	822.607	0.516332	0.212609	2.42855	0.0151593	0.0763748	NOT	1061	811	927	892	906	512	457	1222
AREG	45.3369	-0.669685	0.589628	-1.13577	0.256051	0.480786	NOT	49	26	135	75	27	9	33	30
AREL1	702.001	0.100698	0.239981	0.419607	0.674773	0.824229	NOT	890	1225	901	759	669	679	240	679
ARF1	2224.26	-0.158982	0.157183	-1.01145	0.311802	0.540031	NOT	3873	3428	2874	2813	2140	1262	913	2397
ARF2	74.0262	0.259826	0.336038	0.773204	0.439401	0.655314	NOT	109	107	65	93	99	26	51	75
ARF3	551.298	0.429033	0.297047	1.44432	0.148648	0.345217	NOT	919	593	612	478	765	238	243	893
ARF4	492.584	0.758541	0.248222	3.05589	0.00224391	0.0196537	NOT	679	392	434	495	555	322	310	777
ARF5	304.609	0.352447	0.310008	1.1369	0.255582	0.480294	NOT	375	551	276	310	278	378	98	297
ARF6	810.027	0.759225	0.184183	4.12211	3.75414e-05	0.000935176	NOT	1059	867	762	650	1001	567	483	1182
ARFGAP1	1145.8	-0.352519	0.184153	-1.91427	0.0555856	0.185841	NOT	1927	1873	1613	1668	994	761	362	1093
ARFGAP2	397.562	0.410045	0.231654	1.77008	0.0767144	0.230524	NOT	432	650	420	407	409	397	150	477
ARFGAP3	699.62	0.789821	0.213069	3.70688	0.000209831	0.00342142	NOT	771	874	726	490	851	642	304	1070
ARFGEF1	203.225	0.293676	0.194252	1.51183	0.130577	0.32087	NOT	267	306	225	217	206	118	116	264
ARFGEF2	168.058	-0.529101	0.242213	-2.18445	0.0289296	0.11929	NOT	241	370	269	228	110	88	54	192
ARFGEF3	49.2778	-1.24803	0.416573	-2.99595	0.00273592	0.022543	DOWN	114	188	48	57	26	14	14	40
ARFIP1	362.521	0.586657	0.17872	3.28254	0.00102875	0.0110195	NOT	496	472	323	330	442	276	181	491
ARFIP2	497.051	-0.111855	0.184318	-0.60686	0.543944	0.73674	NOT	681	1003	647	563	397	345	218	525
ARFRP1	134.87	0.207951	0.261196	0.79615	0.425945	0.645174	NOT	164	223	135	175	167	119	50	119
ARG2	44.1494	0.301344	0.351219	0.857995	0.390895	0.615599	NOT	58	57	45	56	39	47	24	33
ARGLU1	213.168	-0.259701	0.245551	-1.05762	0.290227	0.517201	NOT	331	493	231	259	174	100	122	192
ARHGAP1	213.98	0.397792	0.210647	1.88843	0.0589688	0.193696	NOT	281	309	181	256	254	171	115	210
ARHGAP10	124.23	-0.001975	0.260142	-0.00759202	0.993942	0.996878	NOT	142	211	151	181	115	109	49	109
ARHGAP11A	92.4335	-0.531235	0.328911	-1.61513	0.106282	0.282936	NOT	144	192	97	173	77	25	49	84
ARHGAP12	162.404	-0.104381	0.291715	-0.357817	0.720481	0.851238	NOT	264	295	193	187	153	57	113	147
ARHGAP15	34.3654	1.34912	0.45886	2.94016	0.00328042	0.0255052	UP	17	15	32	38	47	21	26	63
ARHGAP17	375.701	-0.284058	0.288333	-0.985172	0.32454	0.552889	NOT	380	538	819	480	314	217	169	349
ARHGAP18	204.879	1.24661	0.257316	4.84464	1.26839e-06	7.43872e-05	UP	172	160	203	128	267	138	167	321
ARHGAP19	72.1338	-0.3006	0.324273	-0.926997	0.353928	0.581735	NOT	79	140	117	102	78	25	38	61
ARHGAP20	21.495	1.74444	0.563155	3.09763	0.00195077	0.0178471	UP	15	13	21	5	26	8	24	44
ARHGAP21	180.326	0.0947591	0.273965	0.34588	0.729433	0.857438	NOT	301	367	171	156	159	161	85	158
ARHGAP22	39.8254	0.22115	0.404936	0.546136	0.584972	0.763568	NOT	57	34	47	60	37	15	25	59
ARHGAP23	9.97518	0.919134	1.07047	0.858623	0.390549	0.61555	NOT	3	8	1	24	20	0	13	4
ARHGAP24	33.2565	0.919263	0.40819	2.25205	0.0243192	0.104844	NOT	33	45	31	19	34	17	34	43
ARHGAP25	109.684	0.56826	0.324308	1.75223	0.0797351	0.236186	NOT	141	117	141	88	143	46	56	193
ARHGAP26	271.51	0.459051	0.24275	1.89104	0.0586185	0.193198	NOT	298	389	295	288	315	244	88	381
ARHGAP27	380.945	0.109011	0.248535	0.438614	0.660942	0.816462	NOT	591	426	588	394	406	193	188	482
ARHGAP28	15.4092	-0.554425	0.551425	-1.00544	0.314685	0.543266	NOT	19	35	11	37	11	6	6	17
ARHGAP29	76.886	0.116905	0.287968	0.405966	0.684768	0.830562	NOT	86	103	106	105	55	60	42	85
ARHGAP30	86.0525	0.653764	0.334456	1.95471	0.0506173	0.173967	NOT	112	72	106	76	126	45	37	147
ARHGAP31	64.2994	0.444401	0.289095	1.53721	0.124242	0.310541	NOT	91	76	74	60	79	61	28	63
ARHGAP32	112.789	0.0750581	0.263071	0.285316	0.775402	0.884872	NOT	166	177	138	132	114	56	43	172
ARHGAP33	12.4654	0.566116	0.591886	0.956461	0.338839	0.567572	NOT	15	23	11	8	9	19	5	11
ARHGAP35	506.729	0.296858	0.191786	1.54786	0.121656	0.306896	NOT	754	684	464	622	611	321	239	622
ARHGAP39	70.4584	-0.670503	0.356196	-1.8824	0.0597816	0.195047	NOT	124	175	75	111	43	48	34	30
ARHGAP4	267.092	0.516301	0.263213	1.96153	0.0498174	0.171965	NOT	361	281	305	262	370	149	109	429
ARHGAP42	105.609	-0.153801	0.247079	-0.62248	0.533627	0.730105	NOT	158	194	132	132	71	72	59	96
ARHGAP45	168.8	0.67398	0.294063	2.29196	0.0219082	0.0978422	NOT	241	164	169	146	193	119	63	325
ARHGAP5	309.791	0.174827	0.179193	0.975633	0.329246	0.558214	NOT	451	446	335	378	271	225	158	365
ARHGAP6	36.9728	-0.308872	0.521337	-0.592461	0.553542	0.742337	NOT	41	45	22	109	20	23	21	33
ARHGAP8	67.7183	-0.604894	0.428752	-1.41083	0.158296	0.358051	NOT	87	90	205	56	56	35	20	62
ARHGAP9	149.571	0.481839	0.396305	1.21583	0.22405	0.443812	NOT	140	130	277	122	214	79	47	264
ARHGDIA	3293.31	-0.257496	0.220858	-1.16589	0.24366	0.467507	NOT	6640	5626	3540	4262	3531	1576	1142	3638
ARHGDIB	540.72	1.2031	0.289809	4.15134	3.30536e-05	0.000850778	UP	649	344	437	366	949	315	315	916
ARHGDIG	15.2259	-0.766363	0.597323	-1.28299	0.199494	0.413644	NOT	21	46	8	33	10	9	7	7
ARHGEF1	417.493	-0.308228	0.246897	-1.24841	0.211882	0.428783	NOT	622	644	744	519	339	198	146	546
ARHGEF10	67.9965	-0.26866	0.321405	-0.83589	0.403217	0.627141	NOT	85	104	81	133	68	43	31	46
ARHGEF10L	188.867	-0.807911	0.297199	-2.71842	0.00655954	0.0420155	NOT	270	311	336	378	97	117	79	106
ARHGEF11	260.564	-0.404752	0.242228	-1.67095	0.0947307	0.262512	NOT	389	623	367	295	178	192	105	202
ARHGEF12	161.531	0.739398	0.310244	2.38328	0.0171592	0.0828858	NOT	200	191	130	154	264	62	90	258
ARHGEF15	34.3976	-0.726752	0.427612	-1.69956	0.0892138	0.253531	NOT	56	53	53	73	26	18	4	40
ARHGEF16	1932.52	-0.490685	0.272663	-1.7996	0.0719234	0.220894	NOT	2437	2944	4489	2323	1356	1230	747	1595
ARHGEF17	125.215	-0.130557	0.319461	-0.408679	0.682775	0.829503	NOT	138	161	144	259	100	94	61	104
ARHGEF18	733.316	0.310632	0.234413	1.32515	0.185122	0.39519	NOT	722	1155	966	774	665	713	314	821
ARHGEF19	154.573	0.747261	0.440304	1.69715	0.0896683	0.254031	NOT	67	215	239	112	229	76	51	326
ARHGEF2	395.692	-0.254997	0.198805	-1.28265	0.199616	0.4137	NOT	645	632	622	478	375	240	131	420
ARHGEF25	146.012	-0.794569	0.474569	-1.6743	0.0940724	0.261521	NOT	154	263	115	462	70	83	82	55
ARHGEF26	53.7534	0.87191	0.319731	2.72701	0.00639109	0.0412592	NOT	40	81	35	57	66	38	35	80
ARHGEF28	153.576	-0.548912	0.404276	-1.35777	0.174538	0.380526	NOT	160	275	403	150	112	125	58	69
ARHGEF3	49.9838	-0.144936	0.410802	-0.352812	0.72423	0.853334	NOT	45	101	51	91	42	40	29	25
ARHGEF33	18.2707	1.35287	0.583613	2.31809	0.0204446	0.093609	UP	22	14	17	4	24	28	12	12
ARHGEF37	423.901	0.379079	0.31926	1.18737	0.235083	0.456558	NOT	386	614	740	286	525	352	145	543
ARHGEF39	125.998	-1.10702	0.369712	-2.99426	0.0027511	0.0226279	NOT	179	324	295	152	63	42	67	52
ARHGEF40	88.6347	-0.323714	0.312039	-1.03742	0.299542	0.527081	NOT	117	183	86	160	60	69	39	67
ARHGEF5	354.371	0.350681	0.16909	2.07393	0.0380859	0.14443	NOT	486	472	398	370	420	239	172	435
ARHGEF6	126.151	0.379622	0.242489	1.56552	0.11746	0.299676	NOT	187	149	149	118	135	80	84	135
ARHGEF7	436.726	-0.132731	0.183461	-0.723482	0.469384	0.681135	NOT	624	787	599	531	381	236	183	539
ARHGEF9	9.90325	-0.165905	0.792055	-0.209462	0.834088	0.918333	NOT	12	22	5	20	7	0	6	18
ARID1A	242.969	0.419031	0.222064	1.88698	0.059163	0.193878	NOT	247	428	242	249	212	206	135	300
ARID1B	309.472	0.0238927	0.194004	0.123156	0.901984	0.954634	NOT	425	566	321	402	307	230	146	276
ARID2	142.533	-0.187064	0.223125	-0.838381	0.401817	0.62604	NOT	227	284	160	178	111	98	71	123
ARID3A	147.084	-0.584734	0.29721	-1.96741	0.0491363	0.170587	NOT	291	235	280	168	114	54	45	179
ARID3B	61.9284	0.582839	0.383967	1.51794	0.129029	0.318231	NOT	63	99	82	35	62	74	19	81
ARID3C	15.3574	-0.509033	0.617131	-0.824838	0.409464	0.632197	NOT	43	27	24	7	12	4	11	10
ARID4A	86.4133	0.559182	0.258955	2.15938	0.0308207	0.125245	NOT	117	119	80	74	95	50	61	112
ARID4B	248.287	-0.146094	0.239177	-0.610822	0.541318	0.735005	NOT	353	498	301	307	184	214	108	201
ARID5A	125.821	0.211894	0.329318	0.643434	0.519943	0.720275	NOT	184	129	156	164	144	41	81	162
ARID5B	94.2549	0.404444	0.237763	1.70104	0.0889362	0.25288	NOT	122	141	102	89	94	63	47	140
ARIH1	159.829	-0.35139	0.221726	-1.58479	0.113013	0.293265	NOT	225	293	218	252	135	70	75	161
ARIH2	184.324	0.023573	0.202414	0.116459	0.907289	0.956471	NOT	254	336	218	212	172	100	104	199
ARL1	130.443	0.401406	0.314469	1.27646	0.201794	0.416224	NOT	234	156	139	100	158	56	70	203
ARL10	14.6353	0.128276	0.57334	0.223735	0.822963	0.912184	NOT	29	21	23	6	23	7	6	14
ARL11	22.0194	1.75819	0.532415	3.3023	0.000958958	0.0104774	UP	18	10	22	5	44	12	17	37
ARL13B	14.1974	1.50816	0.614459	2.45445	0.0141102	0.0730155	UP	7	13	6	15	27	22	3	16
ARL14	80.8107	-0.598299	0.443914	-1.34778	0.177729	0.385494	NOT	48	142	230	101	78	38	28	60
ARL14EP	100.06	0.235144	0.341186	0.689197	0.4907	0.698762	NOT	125	204	128	64	63	65	68	129
ARL15	99.4142	0.891805	0.245589	3.6313	0.000282001	0.00427763	NOT	115	108	95	70	132	67	59	157
ARL16	302.668	-0.103292	0.27968	-0.369321	0.711889	0.84698	NOT	333	513	576	296	280	214	155	226
ARL2	226.379	0.38215	0.267999	1.42594	0.153885	0.352617	NOT	372	298	160	266	232	130	158	259
ARL2BP	47.104	1.15745	0.331095	3.49583	0.000472586	0.00623879	NOT	51	44	45	22	56	37	34	76
ARL3	58.5796	0.501419	0.388686	1.29004	0.197038	0.410803	NOT	81	71	41	73	63	37	55	38
ARL4A	199.347	-0.470812	0.261379	-1.80126	0.0716613	0.220381	NOT	267	295	389	298	147	114	94	147
ARL4C	81.0347	0.750875	0.323491	2.32116	0.020278	0.0930627	NOT	133	59	62	78	96	76	44	100
ARL4D	8.98351	0.853843	0.779885	1.09483	0.27359	0.501377	NOT	14	19	2	3	7	15	4	8
ARL5A	453.928	0.783177	0.241194	3.24709	0.00116592	0.0121705	NOT	652	468	424	316	584	310	228	760
ARL5B	252.727	-0.0513368	0.283013	-0.181394	0.856058	0.929698	NOT	420	256	283	433	254	124	112	312
ARL6	15.9755	0.819155	0.633664	1.29273	0.196105	0.409533	NOT	14	40	12	3	14	10	10	32
ARL6IP1	1167.62	-0.398266	0.204165	-1.9507	0.0510923	0.175193	NOT	2583	1755	1438	1587	962	669	429	1133
ARL6IP4	205.956	-0.530712	0.23877	-2.22269	0.0262365	0.111047	NOT	260	435	373	275	169	111	89	145
ARL6IP5	23.8741	-0.0169309	0.521729	-0.0324515	0.974112	0.987731	NOT	29	44	13	48	40	12	9	16
ARL6IP6	197.885	-0.368559	0.187956	-1.96087	0.0498937	0.172186	NOT	335	383	262	261	148	122	87	173
ARL8A	98.5543	-0.354576	0.295808	-1.19867	0.230656	0.451171	NOT	133	174	126	171	59	74	49	71
ARL8B	215.78	0.273975	0.17483	1.56709	0.117094	0.299236	NOT	272	323	243	244	214	149	116	257
ARL9	15.0589	0.0986031	0.627685	0.15709	0.875174	0.939542	NOT	19	30	7	25	21	7	12	5
ARMC1	176.821	-0.389187	0.226251	-1.72015	0.0854045	0.246274	NOT	287	324	219	277	135	120	80	124
ARMC10	130.601	-0.355456	0.347195	-1.02379	0.305933	0.534517	NOT	220	224	111	252	106	46	87	98
ARMC2	10.4318	-0.144881	0.826257	-0.175346	0.860808	0.931371	NOT	14	14	4	27	8	0	9	13
ARMC5	50.0572	-0.315185	0.366912	-0.859022	0.390328	0.615273	NOT	100	83	57	70	51	12	23	60
ARMC6	85.2324	0.075114	0.263339	0.285237	0.775462	0.884872	NOT	162	119	86	95	88	55	44	84
ARMC7	277.875	-0.41349	0.239604	-1.72572	0.0843977	0.244535	NOT	386	523	518	324	199	188	93	269
ARMC8	43.1796	0.311447	0.3298	0.94435	0.344991	0.573817	NOT	45	84	44	43	43	37	25	39
ARMC9	21.0216	-0.890764	0.584972	-1.52275	0.127822	0.316149	NOT	42	29	35	40	8	20	8	4
ARMCX1	12.092	-0.642053	0.597749	-1.07412	0.28277	0.510378	NOT	23	22	16	21	12	11	1	6
ARMCX2	9.7953	-0.290274	0.661539	-0.438786	0.660817	0.816462	NOT	9	17	17	16	9	1	5	14
ARMCX3	60.8099	0.167027	0.387326	0.431232	0.666299	0.820073	NOT	80	83	69	81	69	16	50	58
ARMCX4	8.5559	-0.344601	0.68098	-0.506036	0.612831	0.782814	NOT	17	12	8	16	5	9	1	9
ARMCX5	21.2578	0.966281	0.566074	1.70699	0.0878244	0.250862	NOT	22	44	10	8	14	15	23	28
ARMT1	51.6429	-0.00767991	0.307695	-0.0249595	0.980087	0.989969	NOT	89	96	44	63	48	27	27	60
ARNT	81.8495	1.15567	0.280219	4.12418	3.72064e-05	0.00093224	NOT	84	58	62	72	95	63	65	123
ARNTL	50.2037	-0.411819	0.381766	-1.07872	0.280713	0.508643	NOT	65	98	105	49	31	20	21	67
ARPC1A	1176.73	0.0846667	0.202435	0.418241	0.675771	0.824725	NOT	1929	1639	1419	1336	1087	874	427	1523
ARPC1B	1427.58	0.677517	0.208211	3.254	0.00113794	0.0119772	NOT	2008	1488	1362	1224	1718	1077	664	2268
ARPC2	870.265	0.897205	0.196769	4.55968	5.12318e-06	0.000207385	NOT	961	828	789	765	1141	554	553	1373
ARPC3	1187.28	-0.494145	0.190321	-2.59637	0.00942138	0.0546636	NOT	2078	2047	2043	1489	1072	511	466	1097
ARPC4	1429.06	0.216501	0.203292	1.06497	0.286888	0.514328	NOT	2136	1831	1641	1676	1706	1136	522	1575
ARPC5	264.928	1.92413	0.28665	6.71246	1.91371e-11	7.20228e-09	UP	159	113	163	161	465	170	215	496
ARPC5L	76.4281	0.857699	0.310752	2.76007	0.00577883	0.0386319	NOT	96	54	77	68	95	47	57	106
ARPIN	124.853	0.803863	0.201536	3.98868	6.64421e-05	0.00143221	NOT	136	155	108	107	145	109	75	164
ARPP19	314.432	0.62225	0.239707	2.59588	0.00943488	0.0547192	NOT	445	321	302	297	376	170	217	429
ARPP21	11.98	-0.530994	0.786319	-0.67529	0.499491	0.705489	NOT	9	12	18	35	16	0	6	10
ARRB1	326.407	0.475657	0.220738	2.15485	0.0311735	0.126153	NOT	452	373	295	381	320	256	221	336
ARRB2	202.578	0.488616	0.215274	2.26973	0.0232238	0.101574	NOT	269	248	229	189	235	140	90	306
ARRDC1	500.721	0.0389463	0.199454	0.195264	0.845186	0.924159	NOT	612	797	712	596	451	374	266	437
ARRDC2	348.838	-0.174277	0.218915	-0.796095	0.425977	0.645174	NOT	526	497	594	406	323	175	159	383
ARRDC3	145.041	1.03689	0.308886	3.35687	0.000788307	0.00911725	NOT	110	138	156	114	182	69	123	233
ARRDC4	368.94	0.162923	0.231846	0.702719	0.482231	0.691989	NOT	505	644	522	280	324	269	181	441
ARSA	178.732	-0.0342507	0.395927	-0.0865078	0.931063	0.968327	NOT	220	291	283	201	111	236	43	140
ARSB	17.4258	1.04649	0.762294	1.37282	0.16981	0.374205	NOT	18	45	7	0	24	17	9	25
ARSG	18.505	-0.795936	0.481486	-1.65308	0.0983138	0.268954	NOT	20	53	33	26	14	6	7	16
ARSJ	6.97872	-0.266572	0.811956	-0.328309	0.742678	0.865507	NOT	16	19	5	5	13	1	3	4
ARV1	61.9806	0.39361	0.303247	1.29798	0.194294	0.407031	NOT	99	83	68	48	55	58	35	64
ARVCF	94.6033	-0.153152	0.286588	-0.534396	0.593068	0.770236	NOT	142	188	77	152	77	66	36	104
AS3MT	170.775	0.43482	0.345615	1.25811	0.208353	0.424138	NOT	145	266	299	94	186	130	74	244
ASAH1	152.986	-0.733588	0.264155	-2.77711	0.00548442	0.0370551	NOT	334	240	269	211	121	64	40	154
ASAH2	297.95	1.32056	0.43452	3.03912	0.00237272	0.0203625	UP	138	481	166	195	294	562	134	251
ASAP1	113.796	0.497589	0.291787	1.70531	0.0881358	0.251546	NOT	139	143	91	149	130	54	63	188
ASAP2	85.0917	0.787397	0.298606	2.63691	0.0083666	0.0500881	NOT	97	116	91	46	88	90	50	99
ASAP3	38.1769	-0.554543	0.508218	-1.09115	0.275206	0.502822	NOT	67	58	38	83	34	26	20	7
ASB1	113.282	-0.0142746	0.230668	-0.0618836	0.950656	0.976632	NOT	153	228	139	120	106	84	49	112
ASB13	1749.66	-0.264429	0.262616	-1.0069	0.313981	0.542517	NOT	2754	1924	3219	2375	1388	1331	681	1471
ASB14	39.5616	-0.192782	0.315719	-0.610613	0.541456	0.735014	NOT	57	75	50	51	30	25	22	34
ASB2	107.741	-0.583032	0.416576	-1.39958	0.161638	0.362566	NOT	110	199	136	254	118	36	59	44
ASB3	43.6058	-0.453086	0.310674	-1.4584	0.144732	0.339816	NOT	78	80	51	69	32	22	22	36
ASB6	56.1428	0.78986	0.391751	2.01623	0.0437762	0.157636	NOT	87	84	22	43	60	63	32	60
ASB7	61.4188	0.344904	0.326099	1.05767	0.290208	0.517201	NOT	76	81	82	61	67	56	16	87
ASB8	60.4664	0.460758	0.346608	1.32934	0.183737	0.393621	NOT	87	100	68	32	58	52	41	56
ASB9	10.0438	1.09916	0.709711	1.54875	0.121442	0.3068	NOT	12	9	8	6	13	1	13	13
ASCC1	92.6771	-0.294133	0.270372	-1.08788	0.276647	0.504492	NOT	167	207	99	109	97	52	29	93
ASCC2	109.144	-0.323491	0.258362	-1.25209	0.210539	0.426685	NOT	181	142	158	180	101	59	39	112
ASCC3	111.402	0.0198158	0.271441	0.0730023	0.941804	0.973807	NOT	176	218	124	110	111	52	47	159
ASCL2	44.8983	-1.8805	0.412191	-4.56221	5.06169e-06	0.000206416	DOWN	67	177	74	86	27	8	7	21
ASF1A	103.068	-0.545264	0.265697	-2.0522	0.0401499	0.149249	NOT	170	225	127	163	90	71	27	77
ASF1B	72.4364	-1.3728	0.514266	-2.66944	0.0075978	0.0466488	DOWN	152	217	156	68	64	3	23	43
ASGR2	44.0588	1.52639	0.66386	2.29926	0.0214903	0.0965951	UP	16	55	42	15	115	3	41	53
ASH1L	203.608	0.429085	0.239627	1.79063	0.0733522	0.223801	NOT	239	322	197	211	183	213	101	210
ASH2L	111.923	0.169002	0.28669	0.589494	0.55553	0.743751	NOT	147	182	110	150	122	53	43	180
ASIC1	12.8111	-0.0664813	0.733773	-0.090602	0.927809	0.966637	NOT	28	21	19	6	17	0	9	14
ASL	523.063	-0.441664	0.237339	-1.8609	0.0627577	0.201174	NOT	948	987	849	575	586	215	177	477
ASMTL	127.396	-0.368431	0.287926	-1.2796	0.200685	0.414989	NOT	154	296	129	223	103	88	53	94
ASNA1	145.522	0.242194	0.2273	1.06552	0.286638	0.51403	NOT	216	235	127	171	175	85	69	178
ASNS	87.9602	-0.896198	0.376724	-2.37893	0.0173631	0.0835333	NOT	252	159	134	96	49	19	39	87
ASNSD1	90.0612	0.158376	0.280841	0.563935	0.572798	0.756469	NOT	129	107	136	94	85	49	44	127
ASPA	8.33626	0.889839	0.79859	1.11426	0.265166	0.492522	NOT	9	15	0	10	8	6	4	18
ASPH	27.7551	-0.229551	0.367536	-0.624567	0.532255	0.729493	NOT	52	53	31	33	26	20	9	26
ASPM	78.5639	-1.1556	0.354238	-3.26222	0.00110544	0.0117059	NOT	123	196	191	88	44	34	32	32
ASPN	59.4417	-1.29936	0.461059	-2.81822	0.00482913	0.0338598	DOWN	125	159	36	152	34	19	26	20
ASPRV1	33.592	-0.365793	0.54426	-0.672092	0.501525	0.706661	NOT	29	68	96	15	37	21	10	26
ASPSCR1	1216.85	0.108282	0.214361	0.505141	0.61346	0.78335	NOT	1404	1774	1747	1488	1209	1023	451	1309
ASRGL1	1607.48	0.224355	0.299275	0.749661	0.453459	0.667761	NOT	2551	2568	1870	1345	1946	1017	401	2609
ASS1	933.983	0.114956	0.379126	0.303213	0.761727	0.877051	NOT	690	666	1956	1350	907	600	532	921
ASTE1	33.983	0.232365	0.456331	0.509203	0.61061	0.781574	NOT	46	49	65	13	35	20	19	41
ASXL1	363.448	-0.329325	0.249317	-1.32091	0.186532	0.39669	NOT	431	632	690	459	342	243	141	269
ASXL2	237.678	0.424329	0.252629	1.67965	0.0930248	0.259802	NOT	264	492	212	194	242	207	123	269
ASXL3	13.6061	0.513945	0.625581	0.821548	0.411334	0.633734	NOT	20	6	27	7	17	11	6	17
ATAD1	45.7847	0.232824	0.353352	0.6589	0.50996	0.712685	NOT	61	53	74	41	49	42	22	37
ATAD2	80.245	-0.590908	0.296055	-1.99594	0.0459403	0.163069	NOT	153	190	90	109	60	37	43	50
ATAD2B	22.3141	0.0849065	0.511413	0.166023	0.868139	0.935813	NOT	39	33	37	12	13	10	12	39
ATAD5	34.6599	-0.775366	0.515081	-1.50533	0.13224	0.323287	NOT	66	68	40	65	11	27	20	9
ATAT1	53.7491	-0.554294	0.370138	-1.49754	0.134254	0.325764	NOT	48	133	98	74	35	30	27	37
ATCAY	8.95969	-0.258802	0.831385	-0.31129	0.75558	0.873947	NOT	18	18	1	18	5	12	2	5
ATE1	146.103	0.39675	0.270969	1.46419	0.143143	0.337401	NOT	156	200	220	117	164	85	96	166
ATF1	114.363	0.602003	0.24589	2.44826	0.0143547	0.0738142	NOT	131	122	132	111	114	111	65	129
ATF2	156.696	0.587406	0.242723	2.42007	0.0155174	0.0772135	NOT	216	222	109	155	160	119	109	180
ATF3	186.002	0.298316	0.342495	0.871009	0.383749	0.610013	NOT	225	144	205	313	145	182	106	170
ATF4	3462.66	-0.571164	0.178562	-3.19868	0.00138059	0.0139816	NOT	6661	5329	4928	5765	2905	1656	1275	2986
ATF5	292.545	0.172453	0.342935	0.502873	0.615053	0.784665	NOT	587	371	286	295	353	194	62	462
ATF6	103.038	-0.0597685	0.310872	-0.192261	0.847538	0.925281	NOT	205	184	85	123	134	47	38	115
ATF6B	231.526	0.0525442	0.213518	0.246089	0.805614	0.903671	NOT	392	402	283	202	219	162	105	253
ATF7	129.09	0.0653556	0.243408	0.268502	0.788313	0.893497	NOT	194	222	114	173	116	77	78	130
ATF7IP	135.52	0.494094	0.239205	2.06557	0.0388694	0.146444	NOT	170	219	116	130	139	83	75	211
ATF7IP2	13.6459	-1.88723	0.623822	-3.02527	0.00248413	0.021041	DOWN	27	65	17	17	6	4	3	5
ATG10	39.5147	0.13972	0.336144	0.415655	0.677662	0.826282	NOT	57	77	42	35	35	26	26	37
ATG101	153.972	-0.136225	0.220292	-0.618383	0.536323	0.731111	NOT	218	250	216	203	127	121	65	136
ATG12	41.7201	1.97325	0.431714	4.57073	4.86039e-06	0.00020242	UP	26	21	11	35	46	41	25	106
ATG13	510.92	0.341546	0.19715	1.73242	0.0831987	0.242221	NOT	680	836	489	527	599	440	206	568
ATG14	45.2038	-0.723825	0.35274	-2.05201	0.040169	0.14928	NOT	70	109	69	69	41	29	7	34
ATG16L1	233.165	-0.254708	0.200326	-1.27147	0.203561	0.41838	NOT	337	447	366	262	194	136	94	249
ATG16L2	44.2305	0.168258	0.389369	0.432129	0.665647	0.81981	NOT	52	47	63	61	25	45	24	43
ATG2A	185.703	0.363343	0.308098	1.17931	0.238275	0.46116	NOT	178	293	225	204	195	211	54	200
ATG2B	111.489	0.0200266	0.318965	0.0627862	0.949937	0.976573	NOT	154	263	151	67	109	72	49	126
ATG3	160.032	0.669987	0.262221	2.55504	0.0106175	0.0597609	NOT	199	194	159	136	225	76	91	252
ATG4A	64.004	0.426276	0.33997	1.25386	0.209891	0.425704	NOT	69	49	84	90	74	45	30	86
ATG4B	40.4878	-0.175293	0.340906	-0.514198	0.607114	0.779009	NOT	48	77	51	62	33	17	20	51
ATG4C	47.2888	1.07848	0.316995	3.40219	0.000668484	0.00803855	NOT	43	46	44	33	52	38	42	58
ATG4D	294.318	0.322163	0.23208	1.38815	0.16509	0.367883	NOT	439	438	349	240	354	242	108	351
ATG5	123.242	0.993655	0.245548	4.04668	5.19489e-05	0.00119965	NOT	122	136	96	105	162	74	77	219
ATG7	62.2739	-0.0982614	0.360996	-0.272195	0.785472	0.891636	NOT	82	99	82	92	57	63	12	60
ATG9A	414.716	0.442459	0.20261	2.1838	0.0289771	0.119406	NOT	576	673	357	382	473	352	181	513
ATIC	57.2638	-1.17126	0.332929	-3.51804	0.000434754	0.00590629	NOT	106	148	122	65	32	20	23	31
ATL2	311.528	-0.111062	0.258996	-0.428819	0.668055	0.820413	NOT	409	646	357	403	230	289	109	293
ATL3	126.691	-0.460557	0.272358	-1.691	0.0908363	0.255793	NOT	273	219	124	204	113	57	44	132
ATM	91.7889	-0.786013	0.292262	-2.68941	0.00715782	0.0446762	NOT	165	166	147	155	48	37	50	62
ATMIN	96.3013	0.518044	0.231085	2.24179	0.0249747	0.107007	NOT	125	117	111	85	113	78	50	114
ATN1	389.488	0.204482	0.297655	0.686978	0.492097	0.700054	NOT	533	541	244	677	397	318	154	456
ATOH1	28.7134	0.0273627	0.603448	0.045344	0.963833	0.983347	NOT	97	21	32	10	33	11	17	30
ATOH8	30.2841	1.14825	0.597539	1.92164	0.0546516	0.183305	NOT	21	31	8	43	40	6	34	46
ATOX1	869.066	-0.971719	0.246559	-3.94113	8.10989e-05	0.00166551	NOT	1680	2252	1643	916	733	327	223	634
ATP10A	24.7787	-0.744558	0.681722	-1.09217	0.274757	0.502296	NOT	46	36	20	64	16	8	21	2
ATP10B	319.282	-0.263161	0.242417	-1.08557	0.277667	0.505493	NOT	529	412	528	427	279	237	104	295
ATP10D	40.3823	-0.619454	0.362781	-1.70751	0.0877264	0.250723	NOT	76	77	51	65	23	31	17	22
ATP11A	429.255	-0.239669	0.307649	-0.779033	0.43596	0.652488	NOT	554	832	582	607	302	424	178	236
ATP11B	88.3737	0.651894	0.286877	2.27238	0.0230638	0.10118	NOT	121	122	59	83	86	87	58	90
ATP11C	47.4768	-0.544366	0.393326	-1.38401	0.166355	0.369517	NOT	93	128	74	29	35	22	18	48
ATP13A1	243.214	-0.318031	0.183104	-1.73689	0.0824059	0.240861	NOT	391	479	322	315	219	159	92	206
ATP13A2	142.041	-0.229914	0.219604	-1.04695	0.295123	0.522465	NOT	241	261	155	196	120	85	73	119
ATP13A3	129.845	-0.272801	0.25635	-1.06418	0.287249	0.514486	NOT	248	183	181	171	105	57	58	156
ATP1A1	2095.37	0.410608	0.338211	1.21406	0.224726	0.44444	NOT	2574	2961	2222	2221	1608	3022	715	1765
ATP1A2	128.547	-1.63357	0.815424	-2.00333	0.0451414	0.161219	DOWN	123	349	118	468	33	74	43	11
ATP1A3	20.9009	-2.0202	0.797333	-2.5337	0.0112867	0.062542	DOWN	35	64	11	74	8	0	11	3
ATP1B1	293.665	0.744726	0.296267	2.5137	0.0119472	0.0652411	NOT	310	287	293	306	249	388	156	292
ATP1B2	36.7993	-0.280641	0.442146	-0.634724	0.525608	0.725139	NOT	44	76	21	83	28	23	15	38
ATP1B3	399.945	0.071916	0.289325	0.248565	0.803698	0.902612	NOT	477	405	626	582	482	198	154	528
ATP23	38.8284	-0.838694	0.477062	-1.75804	0.0787407	0.234215	NOT	79	96	54	54	25	4	12	55
ATP2A2	735.159	-0.848047	0.194623	-4.35739	1.31622e-05	0.000423288	NOT	1621	1203	1097	1272	551	352	232	512
ATP2A3	1048.26	0.206773	0.200905	1.02921	0.303382	0.531463	NOT	1708	1638	1069	1044	1197	861	474	951
ATP2B1	1911.56	0.0176285	0.210769	0.0836387	0.933344	0.969727	NOT	3186	2390	2897	1949	1834	1397	793	2029
ATP2B4	342.454	-0.988438	0.470256	-2.10191	0.0355608	0.138204	NOT	393	750	248	1086	148	156	195	113
ATP2C1	141.079	-0.563664	0.273116	-2.06383	0.0390339	0.146469	NOT	255	330	148	212	89	71	76	99
ATP2C2	432.774	-1.22935	0.240361	-5.11459	3.14422e-07	2.3289e-05	DOWN	731	1178	740	735	240	153	171	198
ATP5A1	2346.11	-0.250893	0.244444	-1.02638	0.304712	0.533121	NOT	4022	4220	3379	2593	2395	826	971	2875
ATP5B	2201.14	0.436817	0.250432	1.74425	0.0811152	0.238801	NOT	3022	2489	2623	2144	2968	994	1110	3303
ATP5C1	708.013	0.396847	0.177983	2.2297	0.0257676	0.109461	NOT	953	862	824	728	809	436	376	946
ATP5D	1948.78	0.949429	0.200016	4.74676	2.06704e-06	0.000102798	NOT	2118	2156	1311	1817	2596	1945	909	2757
ATP5E	2595.86	-0.752857	0.241319	-3.11975	0.00181002	0.0168931	NOT	5405	4601	4829	3164	2348	849	835	2314
ATP5F1	927.02	0.131085	0.195935	0.669021	0.503482	0.707702	NOT	1567	1483	1018	900	985	560	389	1214
ATP5G1	1465.73	-0.572075	0.244809	-2.33682	0.0194485	0.0903941	NOT	3009	2702	2028	2021	1502	552	399	1524
ATP5G2	710.762	0.445729	0.16322	2.73085	0.00631713	0.0409716	NOT	979	1009	649	726	787	483	375	959
ATP5G3	1133.19	0.848061	0.240188	3.53082	0.000414277	0.00569477	NOT	1363	982	973	1114	1607	671	600	1935
ATP5H	409.355	0.318153	0.260778	1.22002	0.222458	0.441839	NOT	577	576	402	469	487	158	253	554
ATP5I	1317.65	-0.988018	0.262261	-3.76731	0.000165017	0.00284625	NOT	2794	2876	2531	1568	1248	386	357	923
ATP5J	391.533	0.102309	0.212024	0.482534	0.629427	0.79427	NOT	512	700	455	444	465	183	211	426
ATP5J2	772.545	-0.242306	0.266724	-0.908451	0.36364	0.59038	NOT	1330	1420	1187	741	858	265	391	732
ATP5L	816.658	-0.173603	0.205661	-0.844122	0.398601	0.622675	NOT	1483	1252	1113	950	758	369	371	966
ATP5O	786.671	0.51178	0.194391	2.63273	0.00847009	0.0504043	NOT	1091	1017	762	740	962	445	498	997
ATP5S	64.196	0.728391	0.288221	2.5272	0.0114977	0.0633833	NOT	71	92	45	65	95	48	28	91
ATP5SL	674.144	0.0872095	0.201872	0.432004	0.665739	0.81981	NOT	1008	1061	885	685	813	385	259	823
ATP6	1.59345e+06	1.0322	0.366188	2.81877	0.0048208	0.0338598	NOT	1183471	938101	1687660	1734158	1229105	1452862	1674623	1517340
ATP6AP1	400.011	0.143751	0.195434	0.735548	0.462006	0.675568	NOT	600	612	432	470	380	346	163	421
ATP6AP1L	16.3241	-0.0170997	0.511104	-0.0334565	0.973311	0.987422	NOT	23	33	28	9	17	13	5	17
ATP6AP2	167.588	0.183406	0.307182	0.597058	0.550468	0.740821	NOT	263	273	188	157	143	190	51	169
ATP6V0A1	232.577	-0.3421	0.240189	-1.4243	0.154361	0.352951	NOT	361	433	305	342	203	186	79	161
ATP6V0A2	72.4308	-0.910968	0.337115	-2.70225	0.00688729	0.0434269	NOT	161	140	130	94	41	54	14	47
ATP6V0B	271.464	-0.00301895	0.289103	-0.0104425	0.991668	0.995672	NOT	408	488	285	339	245	285	98	189
ATP6V0C	1776.62	-0.189664	0.201511	-0.94121	0.346597	0.575321	NOT	3301	2894	2070	2275	1662	1329	596	1663
ATP6V0D1	487.861	0.210688	0.209149	1.00736	0.313763	0.542279	NOT	856	704	517	457	541	369	199	562
ATP6V0E1	343.913	0.425494	0.172964	2.46001	0.0138933	0.0722267	NOT	426	479	340	381	387	276	193	354
ATP6V1A	43.063	1.25439	0.521595	2.40492	0.0161762	0.0793009	UP	30	26	28	53	72	10	23	108
ATP6V1B2	207.196	-0.0258759	0.263799	-0.0980894	0.921861	0.96368	NOT	286	304	342	217	260	90	94	221
ATP6V1C1	126.337	0.203575	0.277237	0.734299	0.462767	0.675918	NOT	177	129	138	191	145	79	74	116
ATP6V1C2	199.949	-1.31269	0.231106	-5.68003	1.34667e-08	1.82062e-06	DOWN	513	420	337	317	131	84	44	103
ATP6V1D	103.354	1.12293	0.273648	4.10357	4.06831e-05	0.0010002	NOT	117	88	63	91	134	68	82	155
ATP6V1E1	552.248	0.309765	0.206191	1.50232	0.133015	0.324212	NOT	739	632	685	640	651	315	272	735
ATP6V1F	275.011	-0.0131281	0.242776	-0.0540751	0.956875	0.979983	NOT	500	399	312	327	287	131	108	380
ATP6V1G1	293.095	1.42036	0.193107	7.35529	1.90511e-13	2.46632e-10	UP	269	259	164	198	386	249	203	512
ATP6V1H	88.2447	0.288172	0.267516	1.07721	0.281384	0.509595	NOT	111	109	116	101	107	47	40	123
ATP7A	42.1526	0.888523	0.380441	2.33551	0.019517	0.0906217	NOT	45	51	43	25	28	50	28	56
ATP7B	282.347	-1.03904	0.267421	-3.88539	0.000102164	0.00197005	NOT	424	898	504	334	160	143	77	197
ATP8A1	172.672	-0.574939	0.243161	-2.36444	0.0180573	0.0859063	NOT	273	365	268	239	119	115	74	103
ATP8B1	630.925	0.489455	0.250288	1.95557	0.0505161	0.173817	NOT	661	1097	575	624	585	701	298	649
ATP8B2	19.7335	0.923286	0.531563	1.73693	0.0823997	0.240861	NOT	22	23	18	13	13	7	17	45
ATP8B3	17.4368	0.945042	0.778157	1.21446	0.224571	0.444329	NOT	8	28	31	0	21	22	7	22
ATP8B4	7.58922	0.645466	1.00003	0.645446	0.518638	0.719127	NOT	9	4	1	17	8	0	10	8
ATP9A	609.26	0.103044	0.242141	0.425553	0.670434	0.821523	NOT	851	947	653	803	565	606	233	526
ATP9B	142.044	-0.331918	0.308614	-1.07551	0.282146	0.509979	NOT	166	271	246	190	119	117	32	135
ATPAF1	194.035	0.0450569	0.254345	0.177148	0.859392	0.931194	NOT	309	292	200	259	181	82	102	268
ATPAF2	401.951	-0.302504	0.200936	-1.50548	0.132202	0.32325	NOT	714	727	498	538	375	277	123	375
ATPIF1	593.238	0.277938	0.252678	1.09997	0.271347	0.498484	NOT	806	838	694	632	744	229	342	782
ATR	69.9887	-0.747395	0.332529	-2.24761	0.0246012	0.105797	NOT	139	166	116	72	43	20	35	63
ATRAID	101.894	-0.374658	0.283882	-1.31977	0.186913	0.397127	NOT	138	223	165	118	64	56	37	128
ATRIP	17.7964	0.573616	0.517951	1.10747	0.26809	0.494976	NOT	23	29	20	8	11	12	16	23
ATRN	140.092	-0.241933	0.395532	-0.611665	0.540759	0.734785	NOT	298	227	215	109	89	160	37	99
ATRNL1	7.13037	-0.400477	0.759707	-0.527146	0.598092	0.773443	NOT	8	12	9	16	10	5	0	6
ATRX	86.4255	0.315305	0.254372	1.23954	0.215145	0.433935	NOT	124	129	80	96	77	52	53	116
ATXN1	85.1488	0.435308	0.262036	1.66126	0.096662	0.265906	NOT	95	94	105	100	87	54	50	116
ATXN10	98.3137	-0.0353417	0.284226	-0.124344	0.901043	0.954074	NOT	143	158	81	169	89	70	39	109
ATXN1L	72.0089	0.238479	0.262293	0.909207	0.363241	0.589965	NOT	86	103	91	86	85	50	27	91
ATXN2	123.781	-0.63219	0.244605	-2.58453	0.00975105	0.0560393	NOT	207	252	175	197	98	49	62	85
ATXN2L	327.329	-0.0187266	0.168289	-0.111276	0.911397	0.958188	NOT	446	561	401	422	316	193	146	379
ATXN3	49.1332	1.17431	0.354097	3.31636	0.000911993	0.0101272	NOT	56	51	24	38	52	30	42	87
ATXN7	143.073	0.216596	0.211579	1.02371	0.30597	0.534517	NOT	173	242	169	152	157	99	80	136
ATXN7L1	119.064	-0.0336566	0.241559	-0.139331	0.889189	0.94689	NOT	150	253	141	135	110	63	58	142
ATXN7L2	193.561	-0.856885	0.307954	-2.78251	0.00539405	0.0366042	NOT	192	389	397	371	119	73	83	145
ATXN7L3	270.781	0.472618	0.326234	1.44871	0.147419	0.343279	NOT	393	355	210	306	294	349	93	225
ATXN7L3B	264.549	1.31265	0.233634	5.61841	1.92727e-08	2.37498e-06	UP	246	218	143	232	327	290	148	424
AUH	54.5846	0.691905	0.324873	2.12977	0.0331903	0.131749	NOT	57	62	54	55	66	27	47	63
AUP1	919.36	-0.752715	0.170996	-4.40195	1.07281e-05	0.000361715	NOT	1683	1906	1364	1456	685	525	262	687
AURKA	115.777	-1.11592	0.254284	-4.38847	1.14151e-05	0.000379368	NOT	232	272	209	171	94	34	35	70
AURKAIP1	1205.37	-0.873207	0.222602	-3.92273	8.75496e-05	0.0017592	NOT	2391	2453	1814	1993	1065	418	301	1059
AURKB	129.192	-0.746121	0.226259	-3.29764	0.000975007	0.0106236	NOT	210	308	199	191	94	66	35	115
AUTS2	34.354	0.554365	0.494482	1.1211	0.262244	0.488392	NOT	53	58	18	31	44	7	22	63
AVEN	36.6465	1.1466	0.361567	3.17119	0.00151815	0.0149296	NOT	31	35	27	32	37	49	22	43
AVIL	395.884	0.860758	0.203722	4.22516	2.38774e-05	0.000670347	NOT	444	493	267	369	415	392	228	544
AVL9	147.161	0.273011	0.265249	1.02926	0.303357	0.531463	NOT	238	260	155	105	179	115	64	151
AVPI1	255.173	-0.316695	0.239259	-1.32365	0.18562	0.395503	NOT	527	483	238	347	256	125	104	239
AXIN1	226.716	0.0480907	0.194571	0.247162	0.804783	0.903356	NOT	311	366	270	291	241	163	83	252
AXIN2	71.6554	-0.659701	0.419052	-1.57427	0.115425	0.296987	NOT	108	132	81	156	48	42	42	21
AXL	59.7916	-0.459734	0.36131	-1.27241	0.203228	0.417841	NOT	89	129	55	111	53	22	36	39
AZGP1	55.1852	-0.192743	0.530652	-0.363219	0.716441	0.849131	NOT	94	39	84	94	28	63	30	17
AZI2	253.578	0.34161	0.203898	1.67539	0.093857	0.261164	NOT	309	403	317	218	239	203	136	296
AZIN1	705.642	1.02035	0.155075	6.57973	4.71293e-11	1.47052e-08	NOT	751	728	527	583	914	579	428	1073
B2M	1208.7	-0.331654	0.317389	-1.04494	0.296049	0.52343	NOT	1537	2351	2030	1526	855	1222	306	888
B3GALNT1	20.3184	0.0718411	0.566891	0.126728	0.899155	0.952872	NOT	28	47	29	9	19	4	16	25
B3GALNT2	110.706	-0.292957	0.259259	-1.12998	0.258485	0.483664	NOT	159	212	141	167	103	81	29	107
B3GALT2	42.7861	0.0427514	1.60935	0.0265643	0.978807	0.989394	NOT	56	42	128	0	7	88	13	2
B3GALT4	89.219	0.286389	0.334727	0.85559	0.392225	0.616518	NOT	98	175	91	90	79	106	31	84
B3GALT5	511.145	0.452172	0.214858	2.10452	0.0353332	0.137704	NOT	518	892	593	422	576	425	284	526
B3GALT6	56.7975	-1.01422	0.31854	-3.18396	0.00145275	0.0145327	NOT	137	117	65	106	37	28	13	42
B3GAT2	9.15522	-0.596546	0.784691	-0.760231	0.447116	0.66228	NOT	23	17	10	12	5	13	0	4
B3GAT3	428.386	-0.150278	0.204636	-0.734367	0.462725	0.675918	NOT	558	805	505	632	318	318	189	419
B3GLCT	25.0395	0.192833	0.505672	0.38134	0.702951	0.840944	NOT	43	27	21	36	8	17	19	34
B3GNT2	66.6332	-0.327538	0.306197	-1.06969	0.284757	0.512239	NOT	138	116	67	96	73	30	22	69
B3GNT3	60.6132	0.331527	0.288864	1.14769	0.251096	0.475344	NOT	79	69	78	68	77	49	26	61
B3GNT5	69.9142	0.51977	0.322522	1.61158	0.107054	0.28411	NOT	103	61	88	63	75	47	31	117
B3GNT6	7.45566	-1.43822	0.900418	-1.59728	0.110202	0.289159	NOT	12	9	23	15	7	0	0	8
B3GNT8	517.677	-0.132974	0.227889	-0.583503	0.559554	0.746627	NOT	904	700	672	700	464	407	165	535
B3GNT9	18.5831	0.971964	0.644331	1.50849	0.13143	0.322235	NOT	13	18	6	32	33	18	2	33
B3GNTL1	231.045	-0.517364	0.207458	-2.49383	0.0126373	0.0677122	NOT	332	495	387	299	179	140	78	200
B4GALNT1	22.1655	-0.325089	0.552926	-0.587944	0.55657	0.74472	NOT	40	52	33	16	28	2	11	24
B4GALNT2	22.0944	0.843814	0.591982	1.42541	0.15404	0.352703	NOT	6	16	41	20	27	11	14	40
B4GALNT3	76.9587	-0.412475	0.368299	-1.11995	0.262737	0.488923	NOT	140	139	74	136	68	70	15	55
B4GALNT4	6.91951	0.47807	0.782146	0.611229	0.541048	0.735005	NOT	12	13	4	4	8	9	4	2
B4GALT1	347.66	0.591025	0.218146	2.70931	0.00674227	0.0428508	NOT	485	474	350	251	456	237	167	498
B4GALT2	192.193	-0.284978	0.262136	-1.08714	0.276975	0.50476	NOT	317	354	207	293	152	141	97	118
B4GALT3	79.0459	0.395679	0.359483	1.10069	0.271033	0.498037	NOT	137	108	45	95	88	75	23	107
B4GALT4	7.72036	0.409629	0.746791	0.548519	0.583336	0.762565	NOT	10	18	4	7	14	1	4	11
B4GALT5	383.221	-0.00690333	0.304404	-0.0226782	0.981907	0.990945	NOT	546	687	672	243	408	253	124	471
B4GALT6	24.1118	-0.245115	0.683281	-0.358733	0.719795	0.850789	NOT	27	79	6	39	17	6	24	12
B4GALT7	107.238	-0.359423	0.235488	-1.52629	0.126938	0.314925	NOT	199	219	125	135	78	63	43	111
B4GAT1	10.0126	-0.875922	0.920197	-0.951886	0.341155	0.569956	NOT	24	30	0	21	2	8	2	10
B9D1	138.645	-0.887884	0.22216	-3.9966	6.42575e-05	0.00139375	NOT	217	320	239	223	100	52	47	109
B9D2	76.9994	-0.396756	0.419408	-0.945992	0.344153	0.572827	NOT	153	138	121	78	60	13	32	120
BABAM1	274.064	-0.0344948	0.21713	-0.158867	0.873774	0.938907	NOT	449	439	390	267	256	154	113	353
BABAM2	41.8431	1.12081	0.398196	2.81472	0.00488201	0.0341446	NOT	28	46	28	43	69	49	25	30
BACE1	94.7405	-0.444069	0.246709	-1.79997	0.0718652	0.220799	NOT	135	199	150	123	83	60	35	71
BACE2	243.321	-0.638325	0.311221	-2.05103	0.0402636	0.149418	NOT	651	360	419	219	225	96	80	218
BACH1	120.179	0.118645	0.348883	0.34007	0.733804	0.860047	NOT	217	158	165	98	98	42	89	152
BAD	150.396	-0.152953	0.245814	-0.622232	0.533789	0.730221	NOT	190	258	207	217	177	94	63	111
BAG1	832.868	0.512767	0.245231	2.09095	0.0365322	0.14042	NOT	1118	905	1066	685	1123	498	363	1267
BAG2	21.5343	-1.35047	0.607017	-2.22476	0.0260973	0.110616	DOWN	35	57	13	66	11	15	4	6
BAG3	104.541	0.240154	0.253455	0.947521	0.343373	0.572176	NOT	137	151	104	140	114	86	36	129
BAG4	223	-0.863858	0.262897	-3.28591	0.00101652	0.0109305	NOT	395	524	468	220	169	97	79	146
BAG5	163.968	0.0142081	0.204371	0.069521	0.944575	0.97491	NOT	237	267	200	201	188	107	76	143
BAG6	423.223	-0.269109	0.227472	-1.18304	0.236792	0.459125	NOT	556	710	723	549	323	264	144	506
BAHCC1	103.983	-0.445056	0.321393	-1.38477	0.166122	0.369058	NOT	161	213	126	167	56	94	29	91
BAHD1	160.165	0.0326086	0.239547	0.136126	0.891722	0.948257	NOT	253	253	174	201	202	113	67	126
BAIAP2	36.4732	0.00596127	0.446768	0.0133431	0.989354	0.994712	NOT	58	55	40	49	31	46	6	31
BAIAP2L1	528.564	0.260736	0.211219	1.23444	0.21704	0.436143	NOT	806	713	688	461	549	308	267	722
BAIAP2L2	555.733	0.147826	0.365896	0.404012	0.686204	0.831554	NOT	483	1214	911	366	475	598	168	586
BAIAP3	33.9873	-0.447909	0.508588	-0.88069	0.378486	0.604775	NOT	17	95	68	39	38	14	16	21
BAK1	2196.42	0.299838	0.225211	1.33136	0.183069	0.392734	NOT	3191	2609	2566	2452	2628	1785	735	2769
BAMBI	7.07734	0.176965	0.7661	0.230994	0.817319	0.909591	NOT	17	10	8	3	6	9	1	8
BANF1	1136.39	-0.527304	0.232322	-2.26971	0.0232252	0.101574	NOT	2314	2145	1316	1715	1118	395	463	1013
BANK1	26.2792	0.787067	0.51218	1.5367	0.124367	0.310694	NOT	31	33	23	20	21	6	28	45
BANP	203.213	-0.224288	0.23429	-0.957309	0.338411	0.567143	NOT	265	372	241	329	161	150	93	161
BAP1	423.504	0.0971517	0.201938	0.481097	0.630448	0.79491	NOT	572	783	452	493	475	302	149	494
BARD1	7.89629	-0.458106	0.752145	-0.609066	0.542481	0.73561	NOT	6	17	13	14	5	10	1	4
BARX2	33.0131	-0.367202	0.497307	-0.738381	0.460283	0.673719	NOT	37	48	57	60	32	5	11	52
BASP1	194.109	1.01975	0.262905	3.87876	0.000104989	0.00200821	NOT	169	181	130	219	227	155	162	230
BATF	118.772	0.0782855	0.296445	0.264081	0.791718	0.895583	NOT	215	107	172	134	111	76	54	146
BATF2	279.326	-0.525161	0.364169	-1.44208	0.14928	0.346107	NOT	530	221	370	629	238	119	144	187
BATF3	95.7862	0.866303	0.318662	2.71856	0.0065566	0.0420155	NOT	129	66	87	87	143	65	72	97
BAX	237.428	0.0788395	0.203135	0.388114	0.697932	0.838288	NOT	302	317	315	326	246	168	110	236
BAZ1A	1469.5	-0.193539	0.276279	-0.700519	0.483603	0.693173	NOT	1693	1769	2157	2766	1056	856	830	1353
BAZ1B	76.1621	0.731178	0.272601	2.68223	0.00731338	0.0454357	NOT	87	95	67	71	89	45	42	134
BAZ2A	382.553	-0.0881158	0.200033	-0.440507	0.65957	0.815966	NOT	595	582	581	420	398	234	141	425
BAZ2B	139.718	-0.347435	0.240154	-1.44672	0.147975	0.344031	NOT	229	301	211	137	116	78	67	115
BBC3	13.3519	0.312554	0.602399	0.518848	0.603866	0.777085	NOT	13	28	14	12	17	2	12	14
BBIP1	94.8706	-0.0307772	0.289374	-0.106358	0.915298	0.960549	NOT	106	133	167	113	82	53	56	94
BBOX1	66.1497	0.144375	0.417462	0.345841	0.729462	0.857438	NOT	62	78	153	46	80	43	23	82
BBS1	23.1352	0.10033	0.476676	0.210478	0.833295	0.918227	NOT	37	31	13	41	16	20	14	20
BBS10	11.2725	1.70849	0.647268	2.63955	0.00830167	0.0497635	UP	6	13	1	10	13	14	7	20
BBS12	12.3469	0.84983	0.640667	1.32648	0.184682	0.394916	NOT	18	8	12	11	25	12	1	17
BBS2	18.3584	-1.05223	0.529791	-1.98612	0.0470198	0.16576	NOT	29	48	26	37	17	2	4	18
BBS4	163.185	-0.583185	0.252481	-2.30982	0.0208984	0.0948532	NOT	227	344	217	294	140	104	55	104
BBS5	17.0603	0.225623	0.52164	0.432527	0.665358	0.819776	NOT	33	26	18	13	15	15	3	29
BBX	118.546	0.846266	0.224635	3.76729	0.00016503	0.00284625	NOT	139	127	91	111	132	105	80	147
BCAM	269.435	-1.31638	0.418633	-3.14447	0.00166386	0.0159186	DOWN	574	514	164	849	115	146	76	116
BCAN	28.4316	-1.06781	0.807888	-1.32173	0.186259	0.396342	NOT	19	47	5	131	24	6	16	6
BCAP29	101.301	-0.28509	0.30417	-0.937273	0.348618	0.577025	NOT	102	243	118	159	68	56	52	103
BCAP31	2817.5	-0.23609	0.227092	-1.03962	0.298517	0.526117	NOT	4663	5561	3667	3211	2591	2135	771	2845
BCAR1	1091.99	-0.0867583	0.201142	-0.431329	0.666229	0.820073	NOT	1698	1962	1343	1283	980	826	351	1249
BCAR3	201.422	0.602148	0.28173	2.13732	0.0325719	0.129886	NOT	309	194	183	198	268	195	69	255
BCAS1	69.5794	0.975216	0.472326	2.06471	0.0389506	0.146469	NOT	97	46	74	39	92	19	78	82
BCAS2	165.849	0.160321	0.246801	0.649596	0.515953	0.716827	NOT	212	262	227	164	163	90	114	158
BCAS3	38.0217	-0.309949	0.382787	-0.809715	0.418104	0.639651	NOT	52	91	59	37	49	22	11	28
BCAS4	38.2065	-0.717898	0.485478	-1.47874	0.139209	0.332388	NOT	45	101	25	94	34	10	19	26
BCAT1	38.358	0.640245	0.4676	1.36922	0.170932	0.375727	NOT	73	41	30	26	59	11	19	71
BCAT2	171.313	-0.0517205	0.225097	-0.22977	0.81827	0.909591	NOT	239	275	207	239	171	84	101	159
BCCIP	214.006	0.17308	0.258319	0.670022	0.502844	0.70764	NOT	337	330	209	247	244	86	131	254
BCDIN3D	50.7726	-0.129414	0.394655	-0.327916	0.742975	0.865507	NOT	100	70	80	41	37	37	34	29
BCHE	117.931	0.00429668	0.284756	0.015089	0.987961	0.993886	NOT	155	215	111	174	85	110	51	111
BCKDHA	257.119	-0.321456	0.204361	-1.57298	0.115723	0.297425	NOT	340	556	326	373	197	166	103	245
BCKDHB	47.4767	0.0875398	0.404522	0.216403	0.828674	0.915628	NOT	100	64	35	59	68	16	26	47
BCKDK	130.637	0.398067	0.280119	1.42106	0.155298	0.354397	NOT	150	217	88	175	147	78	87	143
BCL10	89.0064	0.198959	0.402176	0.494708	0.620806	0.78823	NOT	93	71	162	113	113	29	53	110
BCL11A	60.1321	-0.152521	0.314033	-0.485686	0.62719	0.792695	NOT	94	144	54	69	53	45	26	51
BCL2	43.2133	0.984257	0.338773	2.90536	0.00366836	0.0277468	NOT	43	63	33	25	43	47	28	56
BCL2A1	34.1246	1.1418	0.437534	2.60964	0.00906383	0.0530533	NOT	19	31	46	20	68	24	19	41
BCL2L1	316.433	0.323552	0.210048	1.54037	0.123471	0.309672	NOT	407	468	282	407	369	200	138	439
BCL2L11	143.989	1.0805	0.395383	2.73279	0.00628009	0.0408646	NOT	115	219	98	96	178	226	35	181
BCL2L12	53.2698	-0.176894	0.324136	-0.54574	0.585245	0.763685	NOT	91	90	70	62	60	34	27	30
BCL2L13	361.997	0.493874	0.196452	2.51397	0.0119379	0.065216	NOT	480	552	359	302	463	280	159	461
BCL2L14	78.1471	0.563503	0.382823	1.47197	0.14103	0.335011	NOT	118	69	101	58	91	27	50	136
BCL2L15	2273.22	0.957144	0.41425	2.31054	0.0208581	0.0947546	NOT	2199	944	2117	2883	3545	760	1414	4349
BCL3	174.061	0.324526	0.280586	1.1566	0.247436	0.47167	NOT	240	195	221	190	218	70	99	239
BCL6	126.333	0.134773	0.262184	0.51404	0.607224	0.77903	NOT	195	159	127	178	101	105	70	119
BCL6B	31.2872	-0.821764	0.446328	-1.84117	0.0655971	0.2076	NOT	77	37	40	64	15	12	10	36
BCL7A	58.4357	-0.673234	0.342984	-1.96287	0.0496607	0.171722	NOT	129	110	73	92	60	21	12	60
BCL7C	309.88	0.409269	0.234291	1.74684	0.0806648	0.237917	NOT	362	499	307	323	339	306	111	368
BCL9	117.988	-0.0788724	0.256793	-0.307144	0.758734	0.875559	NOT	144	199	129	193	92	74	66	115
BCL9L	163.965	0.104898	0.277234	0.378375	0.705152	0.842185	NOT	225	297	116	249	173	119	61	194
BCLAF1	302.745	-0.0604702	0.232633	-0.259938	0.794912	0.897631	NOT	502	572	354	315	322	130	136	377
BCO1	686.893	0.304144	0.343315	0.885904	0.375669	0.6021	NOT	1022	1364	631	513	837	499	147	1137
BCO2	98.9808	-0.313942	0.325817	-0.963555	0.335269	0.564184	NOT	107	224	185	94	64	66	50	83
BCOR	36.7007	0.0518084	0.361567	0.143288	0.886062	0.945598	NOT	56	51	53	39	36	36	11	34
BCORL1	90.7857	0.133606	0.353516	0.377935	0.705479	0.842448	NOT	147	129	72	132	77	105	30	77
BCR	2234.23	0.803572	0.198958	4.03891	5.37002e-05	0.00121589	NOT	2524	2581	1936	1993	2694	2418	1016	2785
BCS1L	203.185	-0.913707	0.246686	-3.70393	0.000212285	0.0034453	NOT	308	458	355	340	108	82	94	134
BDH1	91.3711	0.162562	0.341012	0.476705	0.633572	0.797045	NOT	147	186	103	59	119	76	27	91
BDH2	397.116	0.964074	0.215968	4.46398	8.04526e-06	0.000294562	NOT	347	545	342	282	569	333	184	631
BDKRB2	18.5098	-0.50894	0.573752	-0.887038	0.375058	0.601623	NOT	26	15	50	24	24	8	6	11
BDP1	139.947	-0.116663	0.225746	-0.516787	0.605305	0.777911	NOT	203	223	211	166	111	78	65	170
BECN1	191.902	0.330561	0.224519	1.47231	0.140937	0.334956	NOT	261	241	231	201	213	106	127	210
BEND3	27.2256	-0.567366	0.39169	-1.44851	0.147476	0.343296	NOT	50	47	36	47	16	18	7	29
BEND5	29.7498	-0.857461	0.693849	-1.2358	0.216532	0.43566	NOT	30	65	18	94	18	16	19	2
BEND6	18.2657	0.957421	0.598705	1.59915	0.109787	0.288394	NOT	28	24	9	10	28	3	18	26
BEND7	206.709	0.0195236	0.217325	0.0898361	0.928417	0.966685	NOT	287	323	301	223	197	169	84	196
BEST4	91.9109	0.690438	0.447206	1.54389	0.122614	0.308395	NOT	73	128	138	48	79	94	85	48
BET1	103.539	0.749504	0.23885	3.13797	0.00170125	0.0161706	NOT	122	133	104	74	127	90	49	150
BET1L	281.488	0.142539	0.194518	0.732781	0.463692	0.67633	NOT	461	415	315	302	312	170	122	349
BEX1	13.1635	-0.954783	0.597626	-1.59763	0.110126	0.289014	NOT	24	43	10	22	10	3	7	7
BEX3	33.1539	0.384228	0.396012	0.970243	0.331925	0.560998	NOT	33	38	27	57	31	22	23	37
BEX4	6.89805	0.157836	1.05306	0.149882	0.880857	0.942999	NOT	14	2	3	15	9	2	8	0
BFAR	162.856	-0.78223	0.305017	-2.56455	0.0103311	0.0584087	NOT	226	392	324	202	117	112	51	80
BGLAP	39.4545	-0.690707	0.552393	-1.25039	0.211157	0.427627	NOT	20	94	91	60	25	37	12	13
BGN	195.147	-0.68791	0.450906	-1.52562	0.127105	0.315137	NOT	531	322	67	426	159	120	50	147
BHLHA15	53.8428	0.32346	0.579783	0.557899	0.576914	0.75838	NOT	130	60	34	48	96	8	13	104
BHLHB9	17.4333	0.0242967	0.51489	0.0471882	0.962363	0.982399	NOT	24	38	21	16	14	5	8	32
BHLHE40	143.685	0.347527	0.292626	1.18761	0.234985	0.456433	NOT	150	210	187	152	156	61	72	244
BHLHE41	10.0299	1.24946	0.781324	1.59916	0.109785	0.288394	NOT	7	8	10	7	15	0	13	14
BICC1	22.0964	0.82439	0.423741	1.9455	0.0517145	0.176654	NOT	24	25	23	17	20	17	11	44
BICD1	9.35185	-1.34973	0.814226	-1.65768	0.0973818	0.267095	NOT	8	15	8	39	2	6	3	4
BICD2	135.669	-0.476928	0.265361	-1.79728	0.072291	0.221345	NOT	188	253	191	233	90	100	56	92
BICDL1	16.4397	0.426483	0.581453	0.733478	0.463267	0.676275	NOT	27	29	15	10	13	21	2	26
BICDL2	90.885	-0.213147	0.315524	-0.675532	0.499338	0.705416	NOT	118	137	140	138	80	81	22	84
BICRA	56.6416	-0.261532	0.311292	-0.840149	0.400825	0.625026	NOT	98	98	92	55	62	34	24	40
BICRAL	55.9263	0.523445	0.363597	1.43963	0.149973	0.347136	NOT	51	74	68	60	92	20	31	74
BID	205.604	-0.663542	0.253064	-2.62203	0.00874075	0.0514651	NOT	410	339	364	277	200	108	50	160
BIN1	266.853	0.00671813	0.234126	0.0286945	0.977108	0.989252	NOT	470	349	284	361	212	178	157	253
BIN2	61.8253	1.0271	0.326432	3.14645	0.00165263	0.0158491	NOT	67	54	48	57	102	43	24	112
BIN3	129.666	-0.174432	0.294797	-0.5917	0.554051	0.7427	NOT	202	220	211	132	102	88	34	179
BIRC3	1157.91	0.0777785	0.220492	0.352749	0.724276	0.853334	NOT	1530	1387	1719	1475	1183	605	665	1231
BIRC5	170.918	-0.76322	0.267696	-2.85107	0.00435722	0.0315893	NOT	356	426	225	216	142	54	53	169
BIRC6	176.753	0.0437469	0.325708	0.134313	0.893155	0.949138	NOT	157	289	357	150	209	114	69	185
BIRC7	6.95329	2.21983	0.811113	2.73677	0.00620451	0.040569	UP	5	0	5	3	12	7	6	10
BIVM	76.6992	-0.086633	0.304003	-0.284974	0.775664	0.884872	NOT	100	165	109	69	57	41	48	78
BLCAP	425.86	-0.144686	0.188527	-0.767455	0.442811	0.658284	NOT	604	741	616	518	381	298	149	463
BLM	39.112	-0.872312	0.406122	-2.14791	0.0317212	0.127554	NOT	83	106	48	49	31	19	18	13
BLMH	227.015	0.0638508	0.209102	0.305358	0.760094	0.876082	NOT	282	437	278	248	239	175	92	223
BLNK	137.975	0.200232	0.358193	0.559006	0.576158	0.757972	NOT	177	205	247	81	160	53	84	171
BLOC1S1	404.275	-0.368743	0.195389	-1.88723	0.05913	0.193878	NOT	702	792	433	621	345	246	140	391
BLOC1S2	101.102	0.233549	0.293555	0.795587	0.426272	0.645481	NOT	151	124	152	84	116	48	60	120
BLOC1S3	22.205	1.55701	0.654618	2.3785	0.0173831	0.0835841	UP	28	24	12	2	36	6	14	59
BLOC1S4	71.9806	0.468005	0.255788	1.82966	0.0673002	0.211548	NOT	95	93	76	70	92	49	44	73
BLOC1S5	9.94938	1.05607	0.762632	1.38477	0.166122	0.369058	NOT	8	16	13	0	16	11	5	10
BLOC1S6	29.685	2.43629	0.59653	4.0841	4.42481e-05	0.00106601	UP	15	4	19	11	24	14	34	85
BLVRA	128.487	-0.299902	0.304124	-0.986115	0.324076	0.55268	NOT	161	244	240	138	108	109	39	101
BLVRB	382.897	-1.24866	0.273131	-4.57166	4.83882e-06	0.00020242	DOWN	944	765	763	519	264	97	83	318
BLZF1	82.3731	0.443271	0.353361	1.25444	0.20968	0.425441	NOT	143	95	84	66	83	31	65	113
BMF	107.562	0.0445353	0.240058	0.185519	0.852822	0.928285	NOT	157	180	121	134	125	52	47	131
BMI1	68.9013	0.857291	0.389184	2.20279	0.0276094	0.115419	NOT	82	76	41	72	98	28	69	67
BMP1	227.982	-0.408206	0.295068	-1.38343	0.166533	0.369734	NOT	336	355	326	400	157	203	62	182
BMP2	41.9096	0.116506	0.364426	0.319697	0.749198	0.870325	NOT	76	54	64	30	51	27	16	47
BMP2K	872.749	0.0870413	0.207831	0.418808	0.675356	0.824564	NOT	935	1399	1049	1265	805	674	446	803
BMP3	15.3543	-0.300597	0.65247	-0.460706	0.64501	0.805394	NOT	14	38	13	30	15	19	2	6
BMP4	86.2147	0.330809	0.266354	1.24199	0.21424	0.432604	NOT	92	117	96	114	116	61	43	81
BMP5	20.6048	1.3151	0.484876	2.71224	0.00668293	0.0426714	UP	13	15	20	16	14	20	14	44
BMP7	68.2885	-1.25218	0.347751	-3.60079	0.000317252	0.00465514	DOWN	160	123	141	106	43	12	19	59
BMP8B	18.904	1.59077	0.62427	2.54821	0.0108278	0.0606913	UP	26	8	7	11	12	38	10	22
BMPER	14.0365	-0.183272	0.72502	-0.252782	0.800437	0.901026	NOT	29	29	11	16	15	20	2	2
BMPR1A	118.379	-0.66682	0.322554	-2.06731	0.038705	0.146101	NOT	246	276	111	186	89	35	64	89
BMPR1B	10.1237	-1.4447	0.814795	-1.77309	0.0762145	0.229517	NOT	12	43	10	19	5	0	7	3
BMPR2	17.255	1.15581	0.490401	2.35687	0.0184297	0.0871945	NOT	22	19	11	8	25	18	13	15
BMS1	91.7339	-0.34186	0.28658	-1.1929	0.23291	0.453929	NOT	161	179	127	109	70	36	35	125
BMT2	39.8669	0.756668	0.432302	1.75032	0.0800626	0.236955	NOT	28	50	24	59	38	23	39	45
BMX	7.57417	-0.718365	0.774603	-0.927398	0.35372	0.581735	NOT	18	13	5	17	8	6	0	5
BNC2	25.1133	0.0245951	0.513052	0.0479388	0.961765	0.982149	NOT	30	54	11	45	23	26	10	17
BNIP1	75.2671	0.0909188	0.317403	0.286446	0.774537	0.884414	NOT	98	112	130	61	81	62	34	61
BNIP2	67.3599	-0.0574435	0.27387	-0.209747	0.833865	0.918306	NOT	110	110	91	70	65	32	39	68
BNIP3	1191.31	0.216407	0.226316	0.956213	0.338964	0.567658	NOT	1720	1466	1304	1549	1011	996	724	1032
BNIP3L	253.055	0.675877	0.178526	3.78587	0.000153172	0.00268291	NOT	286	328	215	254	327	197	150	295
BOC	13.9434	-2.23009	0.667539	-3.34076	0.000835492	0.0095519	DOWN	24	46	13	46	8	3	1	4
BOD1	371.671	-0.55427	0.196387	-2.82234	0.00476751	0.0336822	NOT	643	694	576	534	309	142	150	360
BOD1L1	48.9251	0.462051	0.330896	1.39636	0.162606	0.363682	NOT	73	79	50	31	52	28	31	67
BOK	212.085	-0.603284	0.458827	-1.31484	0.188564	0.399677	NOT	257	465	92	595	142	126	109	104
BOLA1	116.148	1.07571	0.235506	4.56766	4.93205e-06	0.000203795	NOT	89	130	86	109	143	118	64	170
BOLA2B	617.075	-0.340554	0.189986	-1.79252	0.0730496	0.223025	NOT	1196	1125	884	654	568	347	228	592
BOLA3	155.074	0.219672	0.226733	0.968857	0.332617	0.5617	NOT	228	212	147	203	163	97	95	154
BOP1	282.929	-0.630681	0.210542	-2.99551	0.00273983	0.0225618	NOT	487	503	382	520	246	150	84	230
BORA	84.7633	-0.879243	0.409866	-2.1452	0.031937	0.128125	NOT	155	204	150	106	66	9	39	77
BORCS5	59.0603	0.618844	0.272375	2.27203	0.0230847	0.101202	NOT	60	69	57	70	73	42	33	78
BORCS6	101.623	0.792829	0.279223	2.83941	0.00451965	0.0323579	NOT	93	142	105	75	152	94	59	91
BORCS7	180.559	0.430727	0.213164	2.02064	0.043317	0.156507	NOT	250	268	188	153	193	130	117	189
BORCS8	100.11	0.00589914	0.256717	0.0229791	0.981667	0.990846	NOT	126	203	126	109	115	64	34	114
BPGM	51.3306	0.242226	0.297377	0.814542	0.415335	0.637024	NOT	77	80	51	57	59	38	17	68
BPHL	331.685	-0.307995	0.256735	-1.19966	0.230271	0.45067	NOT	642	585	561	263	277	189	130	344
BPI	528.871	-0.307426	0.418219	-0.735085	0.462288	0.675636	NOT	1377	969	580	413	572	154	109	869
BPNT1	301.013	0.409661	0.258177	1.58674	0.112571	0.292662	NOT	330	457	423	229	337	194	127	474
BPTF	62.8186	0.127737	0.41231	0.309808	0.756707	0.874741	NOT	86	94	70	83	43	18	31	129
BRAF	83.2407	0.438762	0.327316	1.34048	0.180088	0.389036	NOT	69	97	114	100	66	76	57	80
BRAP	146.026	-0.30098	0.309696	-0.971854	0.331123	0.56005	NOT	162	284	275	165	136	59	87	112
BRAT1	167.427	-0.443648	0.191531	-2.31632	0.0205406	0.0938503	NOT	277	332	228	236	145	95	68	132
BRCA1	50.1801	-1.18858	0.407079	-2.91978	0.00350274	0.0268291	NOT	130	125	46	92	24	10	22	38
BRCA2	38.9467	-0.782494	0.427351	-1.83103	0.0670958	0.211095	NOT	70	79	84	37	28	15	23	16
BRCC3	104.043	-0.311959	0.303454	-1.02803	0.303938	0.532035	NOT	161	239	106	145	59	85	36	107
BRD1	167.137	-0.424038	0.249197	-1.70162	0.0888266	0.252843	NOT	232	361	177	296	150	94	71	125
BRD2	605.589	0.414802	0.171871	2.41345	0.0158024	0.0781422	NOT	720	836	758	558	639	430	321	791
BRD4	481.991	0.0245708	0.161472	0.152167	0.879055	0.941705	NOT	700	816	550	597	537	294	212	502
BRD7	195.769	0.257305	0.21298	1.20812	0.227002	0.447354	NOT	277	226	260	213	200	134	98	239
BRD8	214.669	-0.674696	0.242161	-2.78615	0.00533386	0.0362843	NOT	285	495	398	286	173	118	79	138
BRD9	314.474	-0.0878545	0.237035	-0.37064	0.710906	0.846393	NOT	436	493	345	509	294	256	106	305
BRF1	672.002	-0.0743721	0.191306	-0.38876	0.697454	0.838288	NOT	802	1223	929	864	643	496	258	663
BRF2	32.394	0.0542644	0.419248	0.129433	0.897015	0.951373	NOT	61	67	35	21	34	18	10	49
BRI3	491.068	0.696976	0.201039	3.46687	0.000526558	0.00673927	NOT	577	734	475	331	627	372	263	674
BRI3BP	470.292	-0.112383	0.184514	-0.609075	0.542475	0.73561	NOT	822	725	558	606	442	332	175	483
BRIP1	17.943	-0.306242	0.532375	-0.575237	0.565131	0.751307	NOT	22	35	17	34	17	6	14	9
BRIX1	146.746	-0.270571	0.276833	-0.977379	0.328382	0.557512	NOT	292	304	144	168	138	94	73	94
BRK1	559.321	0.133185	0.203432	0.654693	0.512666	0.714621	NOT	871	810	520	757	649	315	292	584
BRMS1	216.335	0.175391	0.223325	0.785364	0.43224	0.650205	NOT	250	344	308	221	258	122	118	220
BRMS1L	35.2768	0.0435403	0.36286	0.119992	0.904489	0.955326	NOT	58	47	47	38	27	33	18	28
BROX	159.094	0.457321	0.232828	1.9642	0.0495064	0.171359	NOT	192	202	214	133	188	121	71	211
BRPF1	131.388	-0.500475	0.232384	-2.15366	0.031267	0.126421	NOT	228	240	200	185	97	91	38	117
BRPF3	78.6828	0.592905	0.279226	2.12339	0.0337212	0.133514	NOT	114	77	78	78	101	55	35	118
BRSK1	16.4765	-0.511764	0.606961	-0.843157	0.39914	0.623237	NOT	15	36	10	46	14	12	3	15
BRSK2	9.69797	-1.01347	0.789554	-1.2836	0.199282	0.413644	NOT	14	28	7	25	7	0	2	14
BRWD1	118.117	-0.522947	0.240604	-2.17347	0.0297446	0.121714	NOT	185	257	206	130	96	60	45	104
BRWD3	46.925	-0.254615	0.353148	-0.720987	0.470918	0.682294	NOT	80	83	63	61	45	18	13	70
BSCL2	215.022	-0.285716	0.199191	-1.43438	0.151465	0.34945	NOT	385	363	267	299	216	127	74	204
BSDC1	33.7861	2.36241	0.467535	5.05291	4.35124e-07	3.02955e-05	UP	27	14	17	4	57	35	19	76
BSG	1324.64	-0.819264	0.227242	-3.60524	0.000311859	0.00458571	NOT	2955	2902	1814	1831	1130	725	305	930
BSPRY	191.016	-0.143447	0.230002	-0.623678	0.532839	0.729829	NOT	297	284	217	301	163	139	92	154
BST1	244.058	0.454222	0.327676	1.38619	0.165688	0.368445	NOT	299	369	251	232	235	329	76	223
BST2	256.427	-1.9343	0.472949	-4.08987	4.31606e-05	0.00104373	DOWN	1296	432	170	412	130	38	43	146
BTAF1	202.572	-0.506788	0.204944	-2.47281	0.0134055	0.0703092	NOT	351	374	330	259	138	127	81	166
BTBD1	98.2915	0.529611	0.234848	2.25513	0.0241254	0.104361	NOT	127	116	99	100	101	70	67	115
BTBD10	39.4168	0.234561	0.374977	0.625533	0.531621	0.729055	NOT	63	44	51	39	43	19	31	33
BTBD11	20.2963	0.0334837	0.612746	0.0546453	0.956421	0.979637	NOT	52	13	37	8	24	18	7	15
BTBD19	57.5712	-0.183773	0.387517	-0.474231	0.635335	0.797966	NOT	84	72	109	65	27	53	28	49
BTBD2	772.345	0.1852	0.162106	1.14246	0.253263	0.477749	NOT	1014	1341	826	867	865	556	332	860
BTBD3	380.783	0.647464	0.164406	3.93819	8.20969e-05	0.00167871	NOT	435	481	374	356	403	324	206	524
BTBD6	983.525	0.277889	0.223157	1.24526	0.213035	0.430679	NOT	1377	1552	1103	943	1024	886	331	1228
BTBD7	206.837	0.17713	0.28097	0.630424	0.528417	0.727168	NOT	272	479	204	163	182	176	86	245
BTBD9	43.7291	-0.173694	0.411933	-0.421656	0.673276	0.823195	NOT	67	91	36	68	55	38	9	30
BTC	32.6387	-1.5836	0.699539	-2.26378	0.0235875	0.102707	DOWN	39	70	13	139	13	8	17	5
BTD	204.111	0.0845846	0.267472	0.316237	0.751822	0.871919	NOT	306	334	325	141	215	140	87	225
BTF3	1148.86	0.938215	0.165686	5.6626	1.491e-08	1.97736e-06	NOT	1327	1250	808	1004	1388	1033	703	1573
BTF3L4	140.766	-0.223122	0.23068	-0.967237	0.333426	0.562645	NOT	206	242	159	228	129	86	69	112
BTG1	389.2	0.536777	0.286662	1.87251	0.0611362	0.197738	NOT	534	550	221	475	425	203	277	522
BTG2	196.131	-0.282186	0.283641	-0.994873	0.319798	0.548287	NOT	382	274	169	359	165	97	91	202
BTG3	111.446	-0.434108	0.287825	-1.50823	0.131495	0.322314	NOT	165	239	123	184	76	48	67	90
BTK	42.1999	0.765584	0.397721	1.92493	0.0542384	0.182432	NOT	57	37	58	20	46	43	20	58
BTNL2	575.866	-0.576849	0.382584	-1.50777	0.131613	0.322441	NOT	640	1691	1109	475	334	500	214	284
BTNL9	13.3581	-0.864033	0.808589	-1.06857	0.285264	0.512511	NOT	21	14	15	41	14	11	3	0
BTRC	137.687	0.173504	0.268819	0.645429	0.518649	0.719127	NOT	163	232	188	140	174	80	45	190
BUB1	53.8394	-1.17617	0.357684	-3.28828	0.00100802	0.0108559	NOT	112	176	78	62	27	15	20	41
BUB1B	58.4014	-1.33211	0.360907	-3.691	0.000223378	0.00358533	DOWN	117	174	118	62	25	15	23	38
BUB3	250.144	-0.830404	0.231934	-3.58034	0.000343145	0.0049516	NOT	439	467	542	310	170	116	83	196
BUD13	109.791	0.103748	0.301976	0.343563	0.731175	0.859018	NOT	138	164	180	101	112	44	61	147
BUD23	176.454	0.750995	0.220726	3.40239	0.00066799	0.00803855	NOT	172	223	157	178	185	166	83	271
BUD31	132.309	0.433101	0.262762	1.64826	0.0992986	0.270965	NOT	163	156	136	159	112	89	102	145
BYSL	125.987	0.0986527	0.237633	0.415147	0.678034	0.826546	NOT	198	193	134	152	148	60	68	136
BZW1	793.282	0.413314	0.225103	1.83611	0.0663411	0.209526	NOT	1097	871	915	846	919	399	472	1098
BZW2	225.817	0.0286166	0.308442	0.092778	0.92608	0.965895	NOT	410	401	241	213	261	71	111	309
C10H1orf106	469.518	0.411082	0.187979	2.18686	0.028753	0.118879	NOT	588	682	583	391	530	311	246	616
C10H1orf115	2704.56	1.30472	0.211827	6.15935	7.30429e-10	1.66741e-07	UP	1999	1870	2182	2372	3890	2217	1734	4444
C10H1orf53	104.262	0.0614716	0.292422	0.210215	0.8335	0.918227	NOT	132	214	147	82	77	85	49	116
C10H9orf3	66.4072	1.46426	0.336868	4.3467	1.38204e-05	0.000437384	UP	37	65	60	34	66	60	44	141
C10H9orf64	71.2795	-0.493996	0.304544	-1.62209	0.104785	0.280278	NOT	78	168	119	99	54	31	30	72
C10H9orf72	88.3308	-0.403972	0.289967	-1.39316	0.16357	0.365604	NOT	169	187	124	85	63	40	50	76
C12H17orf100	57.2137	-0.157673	0.424233	-0.371666	0.710142	0.846275	NOT	61	60	115	82	39	43	38	31
C12H17orf49	36.8894	0.633847	0.407669	1.55481	0.119992	0.304074	NOT	36	44	25	54	43	15	24	63
C12H17orf53	22.7798	-0.492591	0.523085	-0.941703	0.346345	0.575245	NOT	40	58	26	25	13	6	20	13
C12H17orf58	13.8541	0.854082	0.656429	1.3011	0.193223	0.405398	NOT	18	12	3	21	16	4	13	22
C12H17orf62	773.133	-0.0523633	0.212551	-0.246357	0.805406	0.903656	NOT	1222	1331	913	928	773	613	238	814
C12H17orf75	23.0232	1.0261	0.553897	1.85251	0.0639521	0.203643	NOT	23	22	35	4	33	13	14	41
C12H17orf78	57.9804	0.485065	0.418385	1.15938	0.246303	0.470283	NOT	87	68	41	74	71	46	10	108
C12H17orf80	122.811	0.156237	0.323706	0.48265	0.629344	0.794238	NOT	87	192	180	173	102	110	50	141
C12H17orf97	6.78987	-0.940976	0.698443	-1.34725	0.1779	0.385746	NOT	13	11	13	12	5	2	2	6
C12H17orf98	9.18193	0.468516	0.924432	0.506815	0.612285	0.782352	NOT	27	12	1	4	4	5	13	4
C13H21orf2	136.694	-0.247346	0.283078	-0.873773	0.382242	0.608772	NOT	189	302	155	187	98	123	50	107
C13H21orf33	1414.04	-0.096789	0.154508	-0.626432	0.531032	0.728534	NOT	1999	2491	1640	1985	1448	833	595	1473
C13H21orf59	129.733	-0.844784	0.27656	-3.05461	0.00225355	0.0196991	NOT	187	275	181	272	83	43	54	109
C13H21orf91	72.0368	0.262349	0.304845	0.860599	0.389459	0.614789	NOT	104	115	62	84	74	32	53	80
C13H3orf18	24.0802	1.20557	0.436651	2.76095	0.00576332	0.0385615	UP	14	19	22	23	34	23	20	22
C13H3orf33	15.154	-0.93153	0.63096	-1.47637	0.139845	0.333305	NOT	30	34	16	28	5	4	13	5
C13H3orf38	331.466	-0.164934	0.176133	-0.93642	0.349057	0.577281	NOT	559	521	421	436	307	177	162	328
C13H3orf52	119.973	-0.0125832	0.221596	-0.0567846	0.954717	0.978779	NOT	213	178	133	145	110	79	57	126
C13H3orf58	66.2052	0.220665	0.432396	0.510331	0.609819	0.781076	NOT	96	117	37	94	48	89	23	51
C13H3orf67	12.5491	0.103111	0.629712	0.163743	0.869933	0.93666	NOT	17	26	23	3	13	10	4	15
C13H3orf70	69.6195	-0.354569	0.323687	-1.09541	0.273338	0.50115	NOT	91	132	65	142	51	36	33	69
C14H10orf10	97.9479	0.364101	0.323266	1.12632	0.26003	0.485443	NOT	104	180	66	134	113	75	32	145
C14H10orf128	22.0259	0.110825	0.545115	0.203307	0.838895	0.920828	NOT	29	21	38	24	22	8	22	11
C14H10orf35	8.56423	0.759718	0.954184	0.796197	0.425917	0.645174	NOT	3	15	7	10	0	18	5	5
C14H10orf76	114.226	0.198009	0.272345	0.727053	0.467194	0.679157	NOT	118	206	147	124	116	92	37	152
C14H12orf43	162.355	-0.219259	0.232378	-0.943543	0.345403	0.574297	NOT	239	307	177	252	164	102	51	169
C14H12orf49	221.731	0.584022	0.254605	2.29383	0.0218002	0.0975179	NOT	295	286	207	205	316	145	80	356
C14H12orf65	64.6542	-0.973459	0.436653	-2.22936	0.0257897	0.10949	NOT	95	142	119	115	39	6	29	66
C14H1orf131	62.3333	0.21529	0.289782	0.742939	0.457519	0.671616	NOT	73	76	81	83	72	37	37	60
C14H1orf198	218.048	0.0672943	0.270265	0.248993	0.803366	0.902458	NOT	280	353	176	369	225	109	109	270
C14H22orf39	178.336	-0.241388	0.309201	-0.780682	0.43499	0.651946	NOT	230	357	225	266	164	123	34	229
C15H2orf54	10.8129	0.138815	0.628805	0.22076	0.825279	0.913733	NOT	7	17	22	10	14	10	4	7
C15H2orf66	13.5628	-1.5881	0.683722	-2.32272	0.0201941	0.0927451	DOWN	25	58	28	7	4	8	3	5
C15H2orf72	69.2987	-0.19905	0.356368	-0.558553	0.576467	0.758027	NOT	133	119	107	58	87	24	23	84
C15H2orf76	48.4322	-0.00807484	0.448254	-0.018014	0.985628	0.992729	NOT	87	73	87	24	44	15	26	72
C15H2orf88	21.6784	0.280734	0.708871	0.39603	0.692083	0.835117	NOT	23	39	9	38	21	36	7	3
C16H5orf22	17.737	-0.434941	0.532778	-0.816364	0.414292	0.636235	NOT	37	30	22	24	13	20	4	8
C16H5orf34	20.8929	-1.5649	0.548656	-2.85224	0.00434128	0.0315348	DOWN	38	42	54	33	8	9	9	3
C16H5orf42	31.4273	-0.0442859	0.369567	-0.119832	0.904616	0.95538	NOT	43	52	41	38	23	18	23	26
C16H5orf49	22.6489	-0.0490674	0.476079	-0.103066	0.917911	0.961867	NOT	27	21	34	40	12	19	11	25
C16H5orf51	205.424	0.797638	0.245529	3.24865	0.00115956	0.0121222	NOT	217	329	173	136	259	137	114	335
C17H20orf194	37.6737	-0.088475	0.500615	-0.176733	0.859718	0.931194	NOT	41	70	21	81	23	39	20	21
C17H20orf196	11.6036	0.701136	0.592441	1.18347	0.236623	0.45891	NOT	6	17	8	18	13	7	6	21
C17H20orf24	69.252	1.12483	0.358689	3.13594	0.00171306	0.0162495	NOT	56	35	55	85	83	62	50	95
C17H20orf27	145.478	0.456439	0.281725	1.62016	0.105198	0.28108	NOT	268	177	104	140	158	92	79	208
C17H8orf4	50.8714	0.270504	0.394682	0.685372	0.493109	0.700601	NOT	66	42	59	79	36	25	38	69
C18H7orf25	61.6719	0.0144152	0.336973	0.0427783	0.965878	0.984077	NOT	74	110	75	81	72	19	39	64
C18H7orf49	50.155	0.618801	0.395129	1.56607	0.117331	0.29961	NOT	51	92	55	27	47	64	22	51
C1D	100.722	0.610447	0.371578	1.64285	0.100414	0.273218	NOT	173	96	62	110	104	44	88	130
C1GALT1	181.984	0.177191	0.312107	0.567727	0.57022	0.754783	NOT	402	206	202	144	236	96	91	194
C1GALT1C1	59.8952	-0.618451	0.314715	-1.96511	0.0494012	0.171127	NOT	137	108	80	82	44	36	13	61
C1H14orf166	469.566	-0.0382712	0.197744	-0.193539	0.846537	0.924741	NOT	699	880	575	509	433	274	277	411
C1H14orf28	26.1557	0.355498	0.452638	0.785391	0.432225	0.650205	NOT	40	45	18	26	36	13	21	17
C1H15orf41	43.0297	0.035164	0.422843	0.0831609	0.933724	0.969727	NOT	67	77	51	43	45	8	31	52
C1H15orf48	629.11	1.13856	0.274404	4.1492	3.33641e-05	0.000857185	NOT	760	508	551	359	1002	411	314	1172
C1H15orf52	59.577	-0.348999	0.374473	-0.931975	0.351349	0.579753	NOT	49	115	72	128	61	31	25	47
C1H15orf57	98.6026	0.261862	0.28509	0.918526	0.358344	0.585811	NOT	105	144	141	104	142	72	41	87
C1H15orf61	10.9623	-1.18759	0.638398	-1.86026	0.0628483	0.201337	NOT	16	27	12	29	10	2	4	5
C1H15orf62	34.352	0.00663029	0.376383	0.0176158	0.985945	0.992856	NOT	51	62	37	42	39	10	20	41
C1H18orf25	88.1564	-0.158285	0.272108	-0.5817	0.560769	0.747531	NOT	111	158	95	148	73	46	48	89
C1H18orf32	190.404	0.332981	0.188009	1.77109	0.0765455	0.230261	NOT	258	286	199	199	215	138	84	243
C1H18orf54	19.5291	0.80918	0.596272	1.35706	0.174761	0.380836	NOT	22	27	26	4	21	8	22	20
C1H6orf120	155.634	-0.0308777	0.23748	-0.130022	0.896549	0.951123	NOT	245	206	184	227	139	126	61	153
C1H6orf183	8.86333	-1.01476	0.889841	-1.14038	0.254126	0.478981	NOT	17	3	27	15	5	0	3	12
C1H6orf203	169.238	-0.499791	0.308939	-1.61777	0.105713	0.282057	NOT	253	255	360	209	141	52	75	182
C1H9orf152	7.79676	0.269729	0.877892	0.307246	0.758656	0.875542	NOT	18	19	4	1	10	1	7	8
C1H9orf16	14.0992	0.365484	0.64299	0.568413	0.569754	0.754543	NOT	22	23	10	16	21	11	0	25
C1H9orf40	139.933	0.386426	0.263068	1.46892	0.141854	0.335885	NOT	181	231	112	157	146	69	94	185
C1H9orf50	26.5997	0.57557	0.410599	1.40178	0.160981	0.36185	NOT	24	42	22	32	29	28	8	38
C1H9orf78	137.849	1.16682	0.271231	4.30196	1.69293e-05	0.000511014	NOT	158	110	118	85	196	96	77	258
C1H9orf85	13.4418	0.63677	0.516511	1.23283	0.21764	0.436817	NOT	21	20	8	11	13	13	6	20
C1QA	394.071	0.804889	0.275393	2.92269	0.00347017	0.0266423	NOT	571	271	346	378	506	319	184	622
C1QB	511.564	0.698206	0.267198	2.61306	0.00897344	0.0526127	NOT	827	394	532	390	628	376	293	706
C1QBP	225.434	0.711568	0.224104	3.17517	0.00149747	0.0147902	NOT	296	247	186	219	302	132	140	318
C1QC	421.541	0.552956	0.262275	2.10831	0.0350041	0.136727	NOT	661	359	338	512	564	303	220	505
C1QL1	9.28453	-0.923192	0.871569	-1.05923	0.289495	0.516823	NOT	6	32	6	26	7	2	0	15
C1QL4	12.52	0.071929	0.60883	0.118143	0.905954	0.956003	NOT	17	15	12	23	7	13	2	20
C1QTNF1	156.354	-1.18546	0.42029	-2.82057	0.00479384	0.0337868	NOT	214	334	122	509	78	46	70	86
C1QTNF12	12.2368	-1.10716	0.65658	-1.68625	0.0917478	0.257245	NOT	7	26	24	32	7	7	4	5
C1QTNF2	47.9487	-0.705628	0.545229	-1.29419	0.195601	0.408787	NOT	63	97	30	133	32	19	34	13
C1QTNF3	81.1289	-0.806821	0.533865	-1.51128	0.130716	0.320914	NOT	133	227	20	203	40	33	45	51
C1QTNF4	27.1728	0.0582771	0.502183	0.116047	0.907615	0.956471	NOT	25	45	49	27	14	34	7	30
C1QTNF5	45.737	-0.842886	0.370584	-2.27448	0.0229371	0.100976	NOT	109	86	47	85	26	14	18	46
C1QTNF7	21.5682	-0.0752169	0.644635	-0.116681	0.907113	0.956428	NOT	19	18	10	68	13	18	13	16
C1R	603.76	-0.102172	0.231656	-0.44105	0.659177	0.815624	NOT	1081	762	696	888	546	481	223	568
C1RL	39.5561	-0.767021	0.410784	-1.86721	0.0618719	0.199114	NOT	72	111	72	31	39	18	8	32
C1S	181.999	0.278127	0.312728	0.889358	0.373811	0.600133	NOT	273	219	116	297	238	96	96	207
C2	650.42	-1.51583	0.388285	-3.9039	9.46554e-05	0.00185644	DOWN	1972	1012	1247	1065	492	113	76	524
C2CD2	48.4378	-0.0721701	0.374164	-0.192884	0.84705	0.925112	NOT	72	62	83	55	38	43	11	61
C2CD2L	352.553	1.23667	0.277295	4.45978	8.20443e-06	0.000295414	UP	357	373	222	229	366	506	173	469
C2CD3	178.152	-0.437148	0.301627	-1.4493	0.147255	0.343069	NOT	338	234	215	328	108	145	65	137
C2CD4B	58.6521	-0.271764	0.533652	-0.509253	0.610575	0.781574	NOT	128	27	63	121	43	19	48	39
C2CD5	244.791	-0.16815	0.175082	-0.960404	0.336852	0.565753	NOT	344	468	318	313	230	152	107	231
C2H11orf24	1997.86	0.84888	0.355202	2.38985	0.0168551	0.0818364	NOT	1900	2566	1341	2137	1842	3223	661	2052
C2H11orf49	30.1114	-0.782239	0.511689	-1.52874	0.126329	0.313906	NOT	43	72	35	61	11	32	6	16
C2H11orf58	188.058	0.734493	0.221565	3.31502	0.000916366	0.0101515	NOT	249	199	162	171	208	125	130	266
C2H11orf68	127.643	0.557986	0.297864	1.87329	0.061028	0.197517	NOT	159	197	100	126	115	148	46	169
C2H11orf84	62.5317	0.124103	0.319659	0.388237	0.697841	0.838288	NOT	103	117	41	77	58	40	37	64
C2H11orf86	3216.4	0.594612	0.3245	1.8324	0.0668925	0.210646	NOT	4225	4089	3511	2452	3766	3472	721	4897
C2H11orf95	423.46	-0.700929	0.246272	-2.84616	0.00442502	0.0319266	NOT	991	994	399	598	307	193	152	366
C2H11orf96	459.247	-0.334183	0.364357	-0.917185	0.359046	0.586336	NOT	573	849	269	1121	371	242	244	362
C2H11orf98	103.387	0.092975	0.368006	0.252645	0.800542	0.901026	NOT	163	161	118	116	122	22	59	147
C2H19orf25	522.927	0.32799	0.221473	1.48095	0.13862	0.331721	NOT	716	805	578	494	517	509	198	609
C2H19orf43	585.762	-0.00438698	0.152055	-0.0288512	0.976983	0.989252	NOT	917	932	692	719	591	380	248	637
C2H19orf44	13.5985	1.17523	0.56812	2.06862	0.0385815	0.145793	NOT	12	19	6	10	18	19	9	9
C2H19orf53	517.176	-0.64136	0.223308	-2.87208	0.00407774	0.0300914	NOT	1085	1167	705	608	471	240	142	473
C2H19orf60	156.757	-1.33902	0.326921	-4.09585	4.20629e-05	0.001024	DOWN	285	459	259	261	112	23	53	95
C2H19orf66	261.388	-0.45237	0.247831	-1.82532	0.0679532	0.212563	NOT	357	359	463	446	210	149	114	201
C2H19orf70	245.845	-0.298395	0.281615	-1.05958	0.289334	0.516667	NOT	469	478	309	271	260	74	113	269
C2H1orf35	605.191	-0.303319	0.240811	-1.25957	0.207825	0.4236	NOT	808	1055	1133	679	531	429	190	572
C2H5orf15	83.9353	-0.104087	0.282709	-0.368178	0.712741	0.847414	NOT	159	167	71	96	79	47	43	82
C2H5orf24	144.301	0.897624	0.24787	3.62135	0.000293073	0.00438193	NOT	167	157	97	140	177	90	92	243
C2H5orf30	158.485	0.362492	0.24332	1.48977	0.136284	0.328901	NOT	254	235	169	122	184	91	90	199
C2H5orf63	56.0815	-0.0899993	0.323108	-0.278542	0.780596	0.888201	NOT	68	99	89	61	49	28	38	46
C3	21972.1	-1.01372	0.359536	-2.81953	0.0048094	0.0338237	NOT	52928	39520	39587	30429	20257	3854	4525	22771
C3AR1	26.9145	0.716911	0.643301	1.11443	0.265097	0.492459	NOT	53	8	20	28	23	30	26	9
C3H16orf45	13.3723	-0.392085	0.65925	-0.594744	0.552015	0.741612	NOT	18	40	3	26	10	9	6	10
C3H16orf52	38.4465	0.569063	0.515143	1.10467	0.269303	0.496037	NOT	73	50	17	34	25	18	45	37
C3H16orf54	38.068	0.188938	0.570847	0.330978	0.740661	0.864159	NOT	81	39	63	16	49	13	7	79
C3H16orf58	31.287	-0.781376	0.449669	-1.73767	0.0822689	0.240664	NOT	72	80	26	49	22	22	4	27
C3H16orf59	82.59	-0.91852	0.278238	-3.3012	0.000962712	0.0105061	NOT	157	190	108	144	54	32	38	47
C3H16orf62	119.075	0.582488	0.228073	2.55395	0.0106507	0.0598996	NOT	117	157	124	127	111	99	71	159
C3H16orf71	10.1078	-2.14178	0.798537	-2.68213	0.0073154	0.0454357	DOWN	35	22	23	11	6	0	4	1
C3H16orf72	144.546	0.560196	0.260292	2.15218	0.031383	0.126742	NOT	199	163	157	128	213	74	80	191
C3H16orf91	125.647	-0.00707597	0.239494	-0.0295456	0.976429	0.989181	NOT	188	241	162	120	146	74	48	138
C3H16orf96	6.69875	-0.504919	0.800826	-0.630497	0.52837	0.727168	NOT	9	11	15	9	11	2	0	7
C3H2orf40	11.8355	-3.45204	0.891401	-3.8726	0.000107681	0.00204843	DOWN	39	36	9	37	4	0	2	0
C3H2orf42	21.5928	0.24085	0.452549	0.532209	0.594581	0.771027	NOT	41	24	22	23	34	10	11	20
C3H2orf49	82.13	-0.521223	0.297459	-1.75225	0.079731	0.236186	NOT	142	143	101	147	63	26	39	85
C3H2orf68	259.175	0.0258634	0.212753	0.121566	0.903243	0.955121	NOT	347	506	334	259	293	145	107	302
C3H7orf26	239.674	0.104527	0.19932	0.524419	0.599987	0.774742	NOT	348	442	225	283	220	160	128	258
C3H7orf43	195.221	-0.396038	0.202866	-1.95222	0.0509125	0.174706	NOT	291	327	309	287	147	108	90	172
C3H7orf50	85.494	0.897272	0.314674	2.85143	0.00435225	0.0315816	NOT	111	129	46	57	86	81	47	137
C4A	1483.36	-0.871371	0.280841	-3.10272	0.00191754	0.0176133	NOT	3677	2835	2177	2023	1379	419	368	1397
C4BPA	1523.77	0.109406	0.2884	0.379355	0.704424	0.841839	NOT	2982	1947	2088	1141	1577	1117	471	2054
C4BPB	428.133	-1.42486	0.349274	-4.0795	4.51325e-05	0.00107799	DOWN	1425	767	872	417	267	81	121	282
C4H1orf112	17.8722	-1.54849	0.523918	-2.95559	0.00312075	0.0246351	DOWN	50	55	25	24	10	8	1	11
C4H1orf226	42.0325	0.171764	0.443583	0.387218	0.698594	0.83847	NOT	40	51	92	30	43	17	27	52
C4H1orf43	161.291	0.333379	0.314623	1.05962	0.289319	0.516667	NOT	271	265	127	150	194	127	42	242
C4H1orf52	55.1755	-0.0820346	0.299943	-0.273501	0.784468	0.89086	NOT	86	90	67	69	49	27	37	47
C4H1orf54	16.803	1.10489	0.585638	1.88664	0.059209	0.193878	NOT	19	23	8	11	16	4	15	39
C4H8orf33	215.692	-0.375562	0.214261	-1.75282	0.0796324	0.236033	NOT	328	413	284	330	220	122	64	204
C4H8orf37	30.8074	0.488373	0.442541	1.10357	0.269781	0.496656	NOT	21	61	19	43	36	16	22	37
C4H8orf59	159.437	-0.876609	0.278159	-3.15147	0.00162451	0.0156766	NOT	376	325	194	260	143	45	57	115
C4H8orf76	42.101	-1.01994	0.573471	-1.77854	0.0753147	0.22804	NOT	87	88	90	44	5	15	32	18
C4H8orf82	65.5052	0.8054	0.333589	2.41435	0.0157634	0.0780186	NOT	77	107	32	56	90	53	45	66
C4H8orf89	6.96535	-1.76027	0.821573	-2.14256	0.0321482	0.128824	DOWN	16	19	4	21	3	1	2	4
C5	820.893	-0.929869	0.244166	-3.80834	0.000139901	0.0024944	NOT	1916	1716	1416	973	577	238	285	719
C5AR1	10.7846	0.486571	0.705573	0.689611	0.490439	0.698702	NOT	19	10	2	19	20	6	4	12
C5H12orf10	198.529	-0.685597	0.181443	-3.77858	0.000157724	0.00274881	NOT	332	404	307	312	149	95	73	159
C5H12orf29	57.3625	-0.510741	0.324526	-1.5738	0.115533	0.297119	NOT	99	116	79	84	71	29	14	41
C5H12orf4	95.8419	-0.42074	0.278857	-1.5088	0.131349	0.32214	NOT	120	214	152	123	56	59	46	86
C5H12orf45	90.2631	0.501812	0.273736	1.83319	0.0667738	0.21032	NOT	130	98	97	85	110	69	60	79
C5H12orf57	323.903	-0.0957583	0.263754	-0.363059	0.71656	0.849192	NOT	687	374	384	398	322	150	169	342
C5H12orf66	7.69198	-0.337986	0.809725	-0.417408	0.67638	0.825324	NOT	12	9	13	12	3	0	6	12
C5H12orf73	116.732	0.140306	0.282767	0.496189	0.619761	0.787406	NOT	133	201	153	133	159	57	41	154
C5H12orf75	58.359	0.144701	0.416307	0.347583	0.728154	0.856525	NOT	113	80	40	75	32	26	48	74
C6	187.15	-1.39001	0.341111	-4.07494	4.60271e-05	0.00109373	DOWN	373	754	286	171	113	56	42	125
C6H16orf70	13.3952	1.08568	0.709709	1.52975	0.126078	0.313481	NOT	25	10	4	10	26	2	7	29
C6H16orf74	19.8148	-0.157767	0.5318	-0.296666	0.766722	0.879506	NOT	26	38	20	34	25	14	1	25
C6H18orf21	92.2033	0.204807	0.273099	0.749938	0.453292	0.667593	NOT	106	194	100	87	94	53	45	125
C6H18orf8	83.4247	-0.5238	0.298462	-1.755	0.07926	0.23538	NOT	134	147	167	94	63	58	23	72
C6H19orf12	369.503	0.780384	0.248248	3.14357	0.00166898	0.015951	NOT	362	519	300	341	399	448	174	408
C6H19orf33	235.236	0.212325	0.356722	0.59521	0.551703	0.741484	NOT	361	408	313	150	293	70	114	372
C6H19orf47	71.8016	-0.366895	0.255245	-1.43742	0.150598	0.348117	NOT	125	141	92	94	70	33	32	62
C6H19orf54	201.846	0.0315164	0.203205	0.155096	0.876745	0.940461	NOT	286	397	216	228	222	126	84	221
C6H19orf68	7.39031	0.731223	0.671731	1.08857	0.276345	0.504189	NOT	9	6	5	10	10	4	6	8
C6H19orf81	50.6924	-1.08104	0.376511	-2.8712	0.00408918	0.0301598	NOT	91	119	106	67	42	8	18	37
C6H1orf109	128.446	-0.145016	0.308629	-0.46987	0.638448	0.800248	NOT	171	192	170	203	132	39	77	133
C6H1orf122	45.8874	0.421598	0.34838	1.21016	0.226216	0.446563	NOT	61	78	30	53	38	31	24	75
C6H1orf123	307.054	-0.293294	0.207581	-1.41291	0.157682	0.357403	NOT	574	528	389	390	282	135	156	284
C6H1orf168	30.3546	-0.244928	0.521319	-0.469824	0.638481	0.800248	NOT	52	64	59	11	31	8	17	32
C6H1orf174	72.0914	0.463979	0.291269	1.59296	0.11117	0.290439	NOT	72	128	55	86	91	60	35	76
C6H1orf210	323.272	0.613041	0.28161	2.17691	0.0294872	0.120981	NOT	415	482	282	265	366	334	96	484
C6H1orf228	30.4383	-0.511579	0.478245	-1.0697	0.284755	0.512239	NOT	69	37	70	20	24	11	13	32
C6H1orf50	267.033	0.0378818	0.206768	0.183209	0.854634	0.929392	NOT	359	473	377	262	304	180	109	267
C7	124.673	1.50993	0.305188	4.94753	7.51626e-07	4.77918e-05	UP	72	109	61	116	222	87	71	232
C7H14orf1	417.461	-0.912341	0.204923	-4.45213	8.50232e-06	0.000302028	NOT	902	854	703	575	322	218	114	255
C7H14orf119	84.6263	0.461827	0.275695	1.67514	0.0939067	0.261164	NOT	131	99	75	88	77	78	51	88
C7H14orf132	52.6422	0.085414	0.411155	0.207742	0.835431	0.918835	NOT	63	105	28	90	56	22	36	51
C7H14orf93	36.1828	-0.153951	0.411682	-0.373956	0.708437	0.844605	NOT	43	61	72	32	36	14	24	29
C7H15orf39	193.665	0.239718	0.228057	1.05113	0.293199	0.520831	NOT	294	255	173	260	225	111	103	224
C7H15orf40	133.431	-0.109613	0.215391	-0.508906	0.610818	0.781644	NOT	221	214	155	177	122	69	70	138
C7H15orf59	12.855	-2.3805	0.873804	-2.7243	0.00644375	0.0414966	DOWN	25	38	2	54	2	1	3	7
C7H6orf106	2417.77	0.312623	0.178369	1.75268	0.0796578	0.236058	NOT	3349	3307	2429	2858	2821	1930	973	2858
C7H6orf125	352.777	-0.67389	0.185251	-3.63771	0.000275076	0.00419465	NOT	683	705	537	484	257	159	156	257
C7H6orf132	378.537	0.0651847	0.209116	0.311715	0.755257	0.873791	NOT	616	648	379	436	365	284	135	462
C7H6orf136	158.969	-0.904722	0.303193	-2.98398	0.00284524	0.0231831	NOT	218	257	398	240	89	81	59	105
C7H6orf222	133.857	0.245243	0.402869	0.608741	0.542696	0.735622	NOT	158	132	271	100	178	53	48	221
C7H6orf223	33.6971	-0.251775	0.384102	-0.655491	0.512152	0.714567	NOT	65	58	47	33	31	25	17	18
C7H6orf226	68.426	0.0862012	0.293563	0.293637	0.769035	0.880628	NOT	88	86	107	79	71	37	42	65
C7H6orf47	76.3091	-0.187526	0.276687	-0.677757	0.497926	0.704207	NOT	112	149	99	96	64	58	21	87
C7H6orf62	188.544	1.02079	0.211443	4.82771	1.38113e-06	7.96271e-05	NOT	181	248	152	122	255	150	108	297
C7H6orf89	346.374	-0.352811	0.214157	-1.64744	0.099467	0.271265	NOT	612	745	489	349	301	200	116	363
C8B	11.4595	-0.281893	0.854391	-0.329935	0.741449	0.864714	NOT	35	14	20	3	19	3	0	17
C8G	92.0859	0.891912	0.534879	1.6675	0.0954141	0.263515	NOT	142	73	79	65	186	30	13	222
C8H4orf19	142.584	-0.757518	0.29771	-2.54448	0.0109441	0.0612035	NOT	365	255	206	179	137	62	30	125
C8H4orf32	56.6411	0.572271	0.356692	1.60438	0.108629	0.286327	NOT	83	58	40	69	65	26	46	69
C8H4orf33	20.998	-0.248693	0.489049	-0.508524	0.611086	0.781824	NOT	33	32	42	18	27	13	9	10
C8H4orf46	22.6677	0.812821	0.4499	1.80667	0.0708133	0.218593	NOT	25	22	25	18	32	8	19	31
C8H4orf48	659.758	0.531588	0.302286	1.75856	0.0786524	0.234074	NOT	802	654	553	927	752	707	202	853
C9	1650.59	-1.22924	0.342656	-3.58738	0.000334021	0.0048501	DOWN	3477	5082	3319	1332	1093	341	429	1441
C9H11orf1	35.5425	0.949021	0.421401	2.25206	0.0243186	0.104844	NOT	19	64	25	29	37	38	27	35
C9H11orf52	118.517	0.248905	0.314522	0.791376	0.428725	0.647364	NOT	160	244	133	81	105	122	52	112
C9H11orf54	211.236	0.838536	0.19452	4.31079	1.62673e-05	0.000497852	NOT	244	226	172	198	248	172	116	327
C9H11orf57	122.943	0.62816	0.29602	2.12202	0.0338362	0.133741	NOT	145	124	113	148	175	60	59	205
C9H11orf65	7.33504	0.225525	0.809007	0.278768	0.780423	0.888109	NOT	7	8	10	12	10	0	3	15
C9H1orf116	546.962	0.0702653	0.397761	0.176652	0.859782	0.931194	NOT	1158	625	659	517	764	108	270	742
C9H1orf21	238.713	-0.243283	0.274926	-0.884905	0.376208	0.602564	NOT	384	419	196	434	162	148	121	231
C9H1orf27	183.586	-1.04289	0.303722	-3.43371	0.000595388	0.00738783	NOT	312	471	359	234	92	89	83	77
C9H1orf74	41.2266	-0.0713688	0.380045	-0.18779	0.851041	0.927144	NOT	44	67	66	54	37	42	13	31
CA11	63.3729	-0.212183	0.472756	-0.448821	0.653561	0.811126	NOT	73	114	37	147	44	36	49	32
CA12	256.872	1.50299	0.960464	1.56486	0.117616	0.299936	NOT	31	166	101	403	194	486	232	69
CA14	21.9399	-0.324284	0.74182	-0.437146	0.662006	0.817164	NOT	13	40	24	53	7	23	16	2
CA5A	16.0468	0.110972	0.611894	0.181358	0.856087	0.929698	NOT	40	25	17	7	16	17	2	20
CA8	35.7304	0.477815	0.562185	0.849926	0.395366	0.619637	NOT	93	35	12	29	17	38	25	39
CA9	138.767	-0.365289	0.320435	-1.13998	0.254294	0.478997	NOT	219	151	272	194	109	58	81	116
CAAP1	50.2548	0.167358	0.410314	0.407879	0.683362	0.829916	NOT	88	72	28	75	28	31	34	67
CAB39	572.196	0.0189207	0.18764	0.100835	0.919681	0.962927	NOT	1046	790	648	669	553	379	255	628
CAB39L	174.186	0.287657	0.236866	1.21443	0.224583	0.444329	NOT	264	201	196	199	137	137	99	211
CABIN1	281.012	0.118942	0.324596	0.366431	0.714044	0.847733	NOT	394	469	179	459	202	285	116	285
CABLES1	30.2619	0.72823	0.460171	1.58252	0.113531	0.294078	NOT	42	54	16	20	44	37	11	26
CABLES2	114.433	0.435275	0.254295	1.7117	0.0869526	0.249253	NOT	144	161	135	102	119	111	43	145
CABP1	7.49683	-2.7482	0.902309	-3.04574	0.00232106	0.0201501	DOWN	10	22	16	23	4	1	1	0
CACHD1	38.7177	-1.00853	0.392175	-2.57163	0.0101221	0.0576012	NOT	104	59	71	52	22	23	7	30
CACNA1A	14.32	-1.09017	0.580307	-1.8786	0.0602986	0.196274	NOT	32	18	26	29	12	9	3	4
CACNA1C	40.8987	0.208995	0.449511	0.464938	0.641976	0.802974	NOT	38	45	37	82	37	41	24	24
CACNA1D	8.82636	-1.69244	0.739092	-2.28988	0.022028	0.0980734	DOWN	14	15	24	20	2	2	1	9
CACNA1E	19.3607	-1.06061	0.489974	-2.16463	0.0304162	0.123967	NOT	50	32	29	32	13	11	7	6
CACNA1G	7.48934	-0.636617	0.981657	-0.648513	0.516653	0.717119	NOT	11	6	3	27	6	0	7	3
CACNA1H	324.014	-0.806644	0.790856	-1.01996	0.307746	0.535975	NOT	258	560	179	1199	135	209	189	78
CACNA1I	7.12734	0.0733845	0.92027	0.0797424	0.936442	0.97103	NOT	17	2	4	15	6	2	1	18
CACNA2D1	93.4066	-0.789567	0.320042	-2.46708	0.0136221	0.0711774	NOT	137	255	91	182	52	54	35	66
CACNA2D2	10.2295	-0.147505	0.625981	-0.235638	0.813713	0.907784	NOT	7	27	13	13	6	5	7	11
CACNB1	18.9806	-0.102176	0.494467	-0.206638	0.836293	0.919207	NOT	21	20	34	29	13	8	13	21
CACNB2	14.9439	0.352258	0.601813	0.585327	0.558328	0.745633	NOT	14	20	9	28	10	21	7	10
CACNB3	109.557	-0.184632	0.310966	-0.593735	0.552689	0.741936	NOT	142	176	104	215	115	71	52	74
CACTIN	124.697	0.54143	0.267881	2.02115	0.0432638	0.156485	NOT	170	174	143	82	176	94	69	122
CACUL1	172.85	0.127442	0.207916	0.612949	0.53991	0.734203	NOT	251	300	218	156	172	113	91	184
CACYBP	324.322	-0.0167074	0.223398	-0.0747875	0.940384	0.97316	NOT	531	544	367	378	318	141	190	354
CAD	27.6976	-0.304323	0.408994	-0.744075	0.456831	0.671243	NOT	45	46	29	49	21	9	14	35
CADM1	34.1154	-0.0434328	0.419971	-0.103419	0.917631	0.961867	NOT	55	38	26	69	25	24	15	41
CADM3	56.3828	-0.919853	0.488354	-1.88358	0.0596223	0.194709	NOT	93	105	37	165	33	15	34	29
CADM4	20.8161	-1.06737	0.680874	-1.56765	0.116963	0.29912	NOT	32	46	6	69	10	6	13	8
CADPS	20.4455	-0.343974	0.538178	-0.639145	0.522729	0.722768	NOT	34	30	14	45	12	10	16	12
CADPS2	35.7071	0.327047	0.379539	0.861697	0.388854	0.614539	NOT	66	38	34	37	30	19	23	52
CAGE1	8.98604	0.496124	0.730034	0.679591	0.496764	0.703228	NOT	5	19	11	7	9	1	8	15
CALCB	29.4797	-1.35173	0.570989	-2.36734	0.0179165	0.0855345	DOWN	44	50	64	66	15	9	17	3
CALCOCO1	64.8478	1.23856	0.316648	3.91148	9.17341e-05	0.00181707	UP	77	62	33	44	73	47	56	102
CALCOCO2	297.069	1.04182	0.232454	4.48181	7.40129e-06	0.000280826	NOT	304	223	288	241	360	217	220	441
CALCRL	53.1957	-0.121921	0.438348	-0.278138	0.780906	0.888221	NOT	109	77	26	98	52	28	15	77
CALD1	838.166	0.364797	0.290036	1.25776	0.208477	0.424235	NOT	1043	1183	543	1283	824	525	632	794
CALM1	4245.61	0.453661	0.169568	2.67539	0.00746428	0.0461341	NOT	4584	5232	4618	5174	5076	2857	2321	5235
CALM2	1713.3	0.484557	0.21094	2.29713	0.0216112	0.0970135	NOT	2329	2216	1513	1873	1987	890	1103	2310
CALM3	3978.06	0.452106	0.14681	3.07953	0.00207326	0.0186259	NOT	5398	5513	3912	3907	4543	2904	1925	5320
CALML4	833.503	-0.420343	0.253506	-1.65812	0.0972938	0.267011	NOT	1255	1139	1690	1080	838	410	267	815
CALN1	8.54894	-0.785497	0.844967	-0.929619	0.352569	0.580802	NOT	6	11	13	28	11	2	0	10
CALR	2948.48	-1.2558	0.20736	-6.05612	1.39441e-09	2.98725e-07	DOWN	7895	6181	4701	4426	1993	1139	640	1852
CALU	215.085	-0.240112	0.263993	-0.90954	0.363065	0.589934	NOT	402	428	213	272	176	182	68	188
CALY	40.3307	-0.887137	0.598789	-1.48155	0.138459	0.331519	NOT	34	124	21	112	17	19	26	13
CAMK1	22.5981	-0.061773	0.534544	-0.115562	0.908	0.956711	NOT	46	37	7	39	22	15	13	16
CAMK1D	31.2091	0.256304	0.413449	0.619917	0.535313	0.730923	NOT	38	45	21	53	38	29	12	27
CAMK1G	10.6705	-0.451162	0.637286	-0.707943	0.478981	0.688674	NOT	7	18	22	20	9	6	2	13
CAMK2A	77.3317	-1.39397	0.572408	-2.43528	0.0148802	0.075266	DOWN	86	161	56	296	28	25	42	16
CAMK2D	202.643	0.154026	0.249393	0.617605	0.536836	0.731348	NOT	319	411	182	182	190	123	122	218
CAMK2G	162.984	0.187003	0.302064	0.619083	0.535862	0.730923	NOT	180	347	113	223	144	146	80	156
CAMK2N1	351.297	0.313587	0.363693	0.86223	0.388561	0.614156	NOT	657	386	463	235	467	181	96	617
CAMK4	49.7216	0.300499	0.382508	0.7856	0.432102	0.650179	NOT	31	78	70	65	57	23	26	72
CAMKK1	48.0095	-0.128787	0.349734	-0.368243	0.712692	0.847414	NOT	67	73	74	64	55	21	13	67
CAMKK2	290.511	-0.365006	0.346135	-1.05452	0.291645	0.518799	NOT	360	544	230	660	234	188	153	164
CAMKMT	17.5602	-1.23998	0.53716	-2.30839	0.0209774	0.0950858	DOWN	48	51	21	23	18	4	3	10
CAMKV	12.673	-1.04017	0.736089	-1.4131	0.157627	0.357403	NOT	12	23	39	17	15	4	5	1
CAMLG	49.6552	-0.0244861	0.420169	-0.0582768	0.953528	0.977969	NOT	99	99	29	58	38	51	23	32
CAMSAP1	293.373	-0.266777	0.266344	-1.00163	0.316524	0.54482	NOT	358	572	351	487	195	213	157	210
CAMSAP2	94.5519	0.374621	0.285058	1.31419	0.188781	0.399997	NOT	97	158	110	91	87	70	71	83
CAMSAP3	611.545	-0.163132	0.176671	-0.923363	0.355818	0.583282	NOT	810	1102	887	774	520	427	275	547
CAMTA1	104.194	0.182627	0.222548	0.820619	0.411863	0.634109	NOT	145	179	111	110	96	72	59	113
CAMTA2	502.607	0.567319	0.210428	2.69603	0.00701719	0.0440155	NOT	638	707	456	463	469	509	288	537
CAND1	207.877	0.045049	0.237053	0.190037	0.84928	0.925949	NOT	333	306	209	287	196	103	97	287
CAND2	47.9367	-0.0797648	0.400885	-0.198972	0.842285	0.92273	NOT	55	60	43	108	45	37	15	52
CANT1	689.65	0.498151	0.256091	1.94521	0.0517493	0.176707	NOT	980	970	549	706	659	775	274	798
CANX	1491.4	-0.517657	0.227741	-2.27301	0.0230256	0.101119	NOT	3312	2383	1892	2153	1522	699	445	1360
CAP1	984.774	0.420959	0.203876	2.06477	0.0389443	0.146469	NOT	1316	1251	1012	1075	1156	505	568	1382
CAP2	44.3308	0.359923	0.642549	0.560149	0.575378	0.757649	NOT	42	72	26	74	26	72	26	6
CAPG	188.996	0.648825	0.337577	1.922	0.0546054	0.183269	NOT	260	192	252	110	311	110	70	294
CAPN1	1446.29	0.187276	0.183835	1.01872	0.308337	0.536364	NOT	2128	1998	1411	1936	1444	1104	614	1722
CAPN10	245.839	-0.383828	0.253902	-1.51172	0.130606	0.32087	NOT	293	485	319	439	243	103	91	258
CAPN13	72.4646	0.212428	0.647504	0.328073	0.742857	0.865507	NOT	11	251	70	63	61	97	32	31
CAPN15	1176.33	0.213912	0.175986	1.21551	0.224173	0.443978	NOT	1456	1842	1332	1408	1082	996	514	1354
CAPN2	305.921	-0.237816	0.22575	-1.05345	0.292136	0.519406	NOT	508	546	304	480	259	168	167	252
CAPN5	1254.17	0.203978	0.196638	1.03733	0.299582	0.527081	NOT	1775	1850	1732	1109	1215	1033	578	1339
CAPN7	32.3641	0.554216	0.445104	1.24514	0.213081	0.430709	NOT	43	23	50	26	29	18	17	62
CAPN9	30.2177	0.964802	0.553875	1.74191	0.0815235	0.23975	NOT	31	53	26	9	23	48	7	49
CAPNS1	1165.41	0.469388	0.177128	2.65	0.00804918	0.0486902	NOT	1592	1476	1047	1305	1408	776	571	1608
CAPRIN1	661.616	0.719745	0.230307	3.12515	0.00177714	0.0167094	NOT	757	806	564	648	762	338	450	1070
CAPRIN2	19.4927	-0.839421	0.512346	-1.63839	0.101341	0.274451	NOT	31	47	47	14	14	6	9	14
CAPS	7.93272	-0.199467	0.799935	-0.249354	0.803087	0.902403	NOT	15	26	1	9	9	4	2	10
CAPZA1	251.179	1.56461	0.354991	4.40748	1.04581e-05	0.00035433	UP	193	95	247	142	367	153	186	511
CAPZA2	119.079	1.16983	0.323005	3.6217	0.000292676	0.00438193	NOT	110	80	112	96	164	59	79	240
CAPZB	628.071	0.0180024	0.19929	0.0903324	0.928023	0.966637	NOT	750	1197	693	844	603	334	302	777
CARD10	412.352	-0.140096	0.225072	-0.622451	0.533645	0.730105	NOT	574	778	484	575	373	316	122	452
CARD11	104.448	-0.274119	0.357886	-0.765938	0.443713	0.659273	NOT	183	153	179	115	113	24	45	133
CARD14	128.27	0.400692	0.352678	1.13614	0.255898	0.480753	NOT	118	137	245	95	143	118	67	115
CARD19	93.9289	-0.232647	0.305697	-0.761039	0.446634	0.661853	NOT	153	203	90	128	109	32	45	91
CARD6	135.213	1.20947	0.256409	4.71695	2.39408e-06	0.000115355	UP	135	135	83	105	200	112	61	255
CARD9	85.3866	-0.22824	0.32549	-0.70122	0.483166	0.692831	NOT	113	86	142	150	76	42	40	89
CARF	9.6691	-0.632405	0.58545	-1.0802	0.280052	0.507809	NOT	19	22	13	13	7	5	2	11
CARHSP1	549.605	-0.461103	0.183898	-2.50738	0.0121631	0.0659286	NOT	979	1255	690	675	487	269	207	510
CARM1	59.9746	0.661908	0.435998	1.51814	0.128978	0.318161	NOT	63	63	28	100	63	25	37	116
CARMIL1	135.613	0.527257	0.223977	2.35407	0.0185692	0.0875933	NOT	157	208	129	131	169	93	60	201
CARMIL2	106.592	0.0466218	0.326887	0.142624	0.886587	0.945598	NOT	147	107	201	111	101	61	42	150
CARNMT1	219.854	0.551776	0.219353	2.51547	0.0118874	0.0650286	NOT	284	358	163	205	284	157	124	256
CARNS1	13.674	0.771928	0.747358	1.03288	0.301662	0.529607	NOT	14	21	6	15	13	15	15	1
CARS	309.548	-0.893214	0.199354	-4.48053	7.44569e-06	0.000281742	NOT	691	603	443	499	238	152	90	201
CARS2	388.824	-0.600876	0.226925	-2.64791	0.00809912	0.0488438	NOT	671	737	527	660	313	215	93	395
CARTPT	10.1053	-1.54767	0.974865	-1.58758	0.112382	0.2924	NOT	3	22	3	51	3	1	5	6
CASC1	33.8997	0.732805	0.424345	1.72691	0.0841841	0.244228	NOT	46	53	19	27	47	40	17	24
CASC3	300.054	-0.160983	0.20533	-0.784019	0.433029	0.650401	NOT	423	596	388	365	271	233	110	269
CASC4	77.066	0.359451	0.294376	1.22106	0.222062	0.441619	NOT	127	112	69	72	66	72	31	105
CASD1	58.8138	-0.61116	0.367562	-1.66274	0.0963642	0.265297	NOT	129	134	70	67	30	44	28	31
CASK	188.931	-0.151537	0.275334	-0.550375	0.582062	0.761696	NOT	309	335	288	178	175	69	94	238
CASKIN1	123.223	0.427142	0.310615	1.37515	0.169086	0.373142	NOT	132	262	92	117	121	129	51	138
CASKIN2	183.456	-0.0039777	0.331135	-0.0120123	0.990416	0.995132	NOT	264	373	116	284	130	173	68	194
CASP1	415.421	-0.0634801	0.235699	-0.269327	0.787678	0.893194	NOT	676	589	543	528	386	169	239	476
CASP10	724.467	0.800496	0.201709	3.96858	7.23031e-05	0.00152856	NOT	821	794	654	653	898	778	353	830
CASP2	200.536	-0.257461	0.227917	-1.12962	0.258635	0.483716	NOT	328	413	274	214	201	85	90	208
CASP3	341.892	1.44779	0.476819	3.03634	0.00239469	0.020508	UP	252	62	385	254	479	159	263	732
CASP6	358.292	0.62003	0.232666	2.66489	0.00770129	0.0470855	NOT	484	402	307	372	454	197	193	575
CASP7	808.694	1.41359	0.290715	4.86246	1.15938e-06	6.98891e-05	UP	801	370	640	572	1209	566	521	1535
CASP8	67.3679	0.87828	0.425518	2.06402	0.0390154	0.146469	NOT	87	37	83	49	86	24	52	117
CASP8AP2	52.3286	0.0176462	0.334544	0.0527471	0.957933	0.980368	NOT	66	100	73	50	30	39	31	57
CASP9	38.076	1.61464	0.347244	4.64988	3.32124e-06	0.000151634	UP	37	27	18	22	58	31	33	54
CASQ1	14.8679	-1.46769	0.662606	-2.21503	0.0267578	0.112637	DOWN	36	35	13	38	7	0	5	14
CASQ2	7.12377	-3.11912	1.04034	-2.99818	0.00271598	0.022392	DOWN	15	13	11	28	0	3	1	0
CASS4	21.5459	1.09573	0.548444	1.99789	0.045729	0.162526	NOT	22	12	33	7	21	28	11	30
CAST	479.31	0.495672	0.259249	1.91196	0.0558819	0.186608	NOT	652	481	586	456	506	238	290	767
CASTOR1	63.2431	-0.606714	0.31036	-1.95487	0.0505979	0.173967	NOT	101	94	87	131	52	32	26	44
CASTOR2	547.593	0.668339	0.286139	2.33571	0.0195061	0.0906012	NOT	442	912	403	619	549	631	228	687
CASZ1	175.291	0.180387	0.249954	0.72168	0.470491	0.681989	NOT	212	281	216	199	128	164	93	169
CAT	515.724	1.46346	0.205731	7.11347	1.13158e-12	9.35052e-10	UP	435	384	392	303	784	419	304	962
CATSPER2	122.62	-0.863984	0.383988	-2.25003	0.0244472	0.105221	NOT	137	225	358	133	65	76	44	73
CATSPERE	6.8416	-0.519729	0.950741	-0.546656	0.584615	0.763451	NOT	4	7	22	10	12	1	0	8
CATSPERG	45.3434	-0.272455	0.363733	-0.749052	0.453826	0.668026	NOT	54	76	55	86	46	36	15	30
CAV1	114.412	-0.230243	0.385483	-0.597283	0.550318	0.740772	NOT	175	246	64	209	112	43	73	88
CAV2	107.773	0.109958	0.367701	0.299043	0.764907	0.878678	NOT	146	161	89	174	90	34	86	125
CAVIN1	929.357	0.28229	0.313239	0.901199	0.367483	0.593987	NOT	1112	1382	503	1636	963	722	540	849
CAVIN2	218.497	0.524203	0.322933	1.62325	0.104535	0.279825	NOT	193	329	124	345	206	145	152	282
CAVIN3	378.312	-0.558209	0.428031	-1.30413	0.192189	0.403898	NOT	370	752	205	1127	282	144	161	383
CBFA2T2	48.2066	-0.158093	0.370868	-0.426279	0.669904	0.821381	NOT	79	112	56	46	59	27	10	59
CBFA2T3	64.6863	0.137672	0.28389	0.48495	0.627712	0.792896	NOT	102	87	58	94	69	41	29	77
CBFB	161.096	0.589568	0.329845	1.78741	0.0738712	0.225033	NOT	289	160	134	135	188	72	90	289
CBL	19.1689	1.55217	0.600055	2.58672	0.00968952	0.0558471	UP	22	11	16	5	39	5	19	27
CBLB	52.6943	0.592673	0.471794	1.25621	0.20904	0.424818	NOT	72	38	79	38	75	12	41	73
CBLC	250.611	0.551509	0.301541	1.82897	0.0674043	0.211636	NOT	198	369	330	226	284	274	84	307
CBLL1	97.0837	0.0966327	0.254388	0.379864	0.704047	0.841533	NOT	116	143	137	118	85	52	56	119
CBLN2	17.7788	-1.60037	0.817704	-1.95715	0.0503304	0.173349	NOT	24	52	11	59	8	0	12	3
CBR3	21.5955	-0.484881	0.581605	-0.833693	0.404454	0.627754	NOT	45	24	19	50	16	4	6	37
CBR4	63.4	0.289786	0.36314	0.798001	0.42487	0.644156	NOT	81	126	61	57	53	24	38	111
CBS	8.45714	-1.57896	0.825407	-1.91295	0.0557543	0.186345	NOT	32	26	8	9	8	0	1	6
CBX1	225.591	0.677637	0.240481	2.81784	0.00483481	0.0338655	NOT	271	295	155	248	265	132	139	351
CBX2	118.884	-0.388718	0.268691	-1.44671	0.147978	0.344031	NOT	231	205	145	165	77	89	55	83
CBX3	63.1926	0.829111	0.296683	2.79461	0.0051963	0.035592	NOT	68	49	60	69	69	53	42	84
CBX4	102.733	0.0080153	0.327501	0.0244741	0.980474	0.990248	NOT	208	116	114	128	94	90	27	122
CBX5	321.385	0.330401	0.230259	1.43491	0.151313	0.349193	NOT	513	434	285	356	375	163	178	431
CBX6	450.131	-0.672839	0.379426	-1.77331	0.076178	0.229506	NOT	436	937	389	1250	275	263	209	262
CBX7	184.179	0.407141	0.308599	1.31932	0.187063	0.397301	NOT	216	322	192	163	156	223	62	210
CBX8	64.1594	-0.575793	0.356542	-1.61494	0.106324	0.282936	NOT	115	130	74	108	74	19	31	36
CBY1	77.0613	0.492529	0.266437	1.84858	0.064519	0.205027	NOT	87	94	70	101	98	47	44	96
CC2D1A	405.011	-0.0608434	0.185164	-0.328593	0.742463	0.865462	NOT	593	825	457	456	343	282	181	428
CC2D1B	199.178	-0.265332	0.253366	-1.04723	0.294995	0.522465	NOT	260	361	357	224	197	94	71	231
CC2D2A	36.9406	-0.709869	0.363384	-1.9535	0.0507609	0.174358	NOT	54	98	55	49	20	22	17	24
CCAR1	604.16	-0.658505	0.215502	-3.05568	0.00224554	0.0196537	NOT	940	1191	1079	866	501	213	260	494
CCAR2	884.813	-0.616936	0.208469	-2.95937	0.00308269	0.0244664	NOT	1412	1802	1462	1260	682	553	226	782
CCBE1	30.6172	-0.0108567	0.531591	-0.020423	0.983706	0.991682	NOT	34	47	35	51	29	3	26	34
CCDC102A	54.7533	0.409847	0.490546	0.835491	0.403441	0.62728	NOT	71	88	12	93	63	25	34	77
CCDC106	23.2489	-0.652	0.519224	-1.25572	0.209218	0.424997	NOT	40	40	16	61	22	7	6	26
CCDC107	346.965	-0.470613	0.182981	-2.57192	0.0101136	0.0575979	NOT	616	764	470	419	294	203	125	291
CCDC112	11.0475	-0.43874	0.653921	-0.670938	0.50226	0.707132	NOT	11	38	13	13	13	3	2	15
CCDC115	159.323	0.488399	0.234593	2.0819	0.0373517	0.142695	NOT	177	281	132	160	158	113	85	235
CCDC117	194.041	0.682072	0.218015	3.12855	0.00175672	0.0165907	NOT	225	259	169	176	194	133	147	249
CCDC12	324.53	-0.291767	0.228792	-1.27525	0.202221	0.416772	NOT	551	581	539	319	302	185	106	356
CCDC120	1291.36	0.506208	0.222625	2.27381	0.0229771	0.10106	NOT	1658	1570	1223	1439	1302	1381	558	1448
CCDC122	7.36787	1.1582	0.887633	1.30482	0.191954	0.403832	NOT	11	12	1	3	7	16	1	7
CCDC124	249.958	0.173307	0.221874	0.781105	0.434741	0.651946	NOT	355	405	330	222	217	153	125	347
CCDC125	112.419	-0.263251	0.279375	-0.942287	0.346046	0.575072	NOT	152	242	181	109	84	65	64	91
CCDC126	32.7502	0.401542	0.443331	0.905739	0.365074	0.591673	NOT	39	39	23	52	16	29	24	39
CCDC127	156.038	-0.708893	0.251333	-2.82053	0.00479444	0.0337868	NOT	268	271	287	235	105	104	41	121
CCDC13	8.82463	0.403119	0.982748	0.410195	0.681663	0.828937	NOT	3	3	12	20	12	7	8	0
CCDC130	111.394	-0.20275	0.281354	-0.72062	0.471143	0.682479	NOT	123	193	212	125	111	62	50	101
CCDC136	11.0984	-1.01645	0.947113	-1.07321	0.283177	0.510782	NOT	7	15	4	51	5	0	7	10
CCDC137	271.902	-0.529078	0.238502	-2.21834	0.026532	0.111991	NOT	437	601	320	437	213	98	132	249
CCDC138	27.3298	-0.795752	0.501338	-1.58726	0.112454	0.292478	NOT	25	69	53	42	11	18	15	11
CCDC14	32.8402	-1.08672	0.512295	-2.12128	0.0338978	0.133947	NOT	45	102	80	23	14	18	15	12
CCDC141	8.9253	1.39792	0.943103	1.48226	0.138272	0.331437	NOT	4	11	10	2	13	7	13	0
CCDC149	131.426	-0.176125	0.309834	-0.56845	0.56973	0.754543	NOT	185	214	166	198	113	91	82	66
CCDC15	26.5959	0.0638879	0.468029	0.136504	0.891423	0.948223	NOT	27	31	54	28	21	10	15	41
CCDC150	54.9581	-0.738853	0.354579	-2.08375	0.0371832	0.142285	NOT	73	139	94	77	32	15	27	54
CCDC157	14.0465	0.245899	0.529662	0.464257	0.642464	0.80344	NOT	18	25	14	16	17	15	2	16
CCDC159	18.5538	-0.318078	0.542093	-0.58676	0.557365	0.744847	NOT	12	24	40	33	14	15	6	16
CCDC160	6.91439	0.0461156	0.790214	0.0583584	0.953463	0.977969	NOT	4	12	3	18	7	3	4	8
CCDC167	205.753	-1.02305	0.321955	-3.17761	0.00148495	0.0147174	NOT	531	537	276	229	160	47	85	130
CCDC170	8.23851	-0.520451	0.713103	-0.72984	0.465488	0.677742	NOT	14	14	7	18	6	9	2	3
CCDC173	7.01725	1.31811	1.15963	1.13666	0.255679	0.480411	NOT	3	0	2	15	4	17	4	1
CCDC174	94.0348	-0.145814	0.262555	-0.555365	0.578645	0.759294	NOT	147	131	122	139	76	45	54	99
CCDC18	27.6622	-1.38854	0.531117	-2.61438	0.00893886	0.052432	DOWN	37	73	73	35	12	4	16	11
CCDC183	8.64528	0.881729	0.811665	1.08632	0.277337	0.505288	NOT	2	8	12	11	19	2	2	18
CCDC186	298.117	0.381335	0.227238	1.67813	0.0933214	0.260264	NOT	424	421	364	237	328	178	144	446
CCDC187	7.0749	-1.23639	0.805076	-1.53574	0.124602	0.31114	NOT	15	16	11	12	5	0	5	2
CCDC189	36.2151	0.20217	0.461742	0.437842	0.661501	0.816759	NOT	44	39	60	37	39	15	34	21
CCDC191	22.1794	-0.920883	0.464927	-1.9807	0.0476244	0.16725	NOT	40	70	27	30	23	9	6	11
CCDC22	104.867	-0.395625	0.310568	-1.27388	0.202707	0.417242	NOT	126	143	182	189	68	75	36	103
CCDC24	70.7763	0.194428	0.382564	0.508224	0.611296	0.781877	NOT	89	96	73	101	43	72	50	43
CCDC25	220.56	-0.259428	0.252889	-1.02586	0.304958	0.533299	NOT	330	330	367	283	155	108	133	203
CCDC28A	76.4722	1.03649	0.284489	3.64334	0.000269121	0.00412267	NOT	77	99	56	50	102	46	62	108
CCDC28B	59.887	0.274508	0.355226	0.772769	0.439659	0.655558	NOT	67	101	40	93	71	51	32	44
CCDC30	103.104	-0.871825	0.351973	-2.47696	0.0132506	0.0698105	NOT	121	214	249	141	72	60	39	44
CCDC34	384.847	-1.05162	0.279594	-3.76123	0.000169082	0.00288788	NOT	536	651	635	966	228	162	143	221
CCDC38	15.7249	-2.16559	0.668247	-3.24071	0.00119232	0.0123904	DOWN	49	30	33	29	2	0	5	11
CCDC43	108.22	-0.352184	0.236978	-1.48615	0.137239	0.33029	NOT	190	214	152	123	81	52	50	115
CCDC47	56.6557	0.103754	0.27129	0.382448	0.702129	0.840612	NOT	88	82	64	67	50	39	32	58
CCDC50	284.744	1.03316	0.240815	4.29029	1.78443e-05	0.000528686	NOT	318	303	216	205	302	182	239	447
CCDC51	108.506	-0.897664	0.307777	-2.9166	0.00353867	0.0270078	NOT	146	244	192	192	68	31	55	73
CCDC57	52.4303	0.50827	0.342916	1.4822	0.138287	0.331437	NOT	49	95	50	52	58	40	17	91
CCDC58	159.67	-1.17429	0.259493	-4.52532	6.03034e-06	0.000238558	NOT	326	350	327	223	103	39	53	117
CCDC59	48.2938	-0.0888039	0.382829	-0.231967	0.816563	0.909135	NOT	84	90	52	55	59	11	25	58
CCDC6	303.92	0.0819774	0.238748	0.343363	0.731325	0.859018	NOT	564	426	305	353	314	175	117	422
CCDC61	234.453	-0.463976	0.243113	-1.90848	0.0563294	0.187607	NOT	332	497	402	278	173	162	98	158
CCDC62	35.0946	-0.190497	0.37645	-0.506035	0.612832	0.782814	NOT	62	59	58	30	35	13	16	42
CCDC65	13.2432	-0.371222	0.651503	-0.569793	0.568818	0.754074	NOT	13	21	34	11	8	7	11	5
CCDC66	37.8641	-1.06035	0.431947	-2.45482	0.0140956	0.0729668	NOT	58	75	84	60	21	6	21	25
CCDC68	67.9982	0.015796	0.322609	0.0489632	0.960949	0.981747	NOT	94	81	107	83	48	35	46	76
CCDC69	259.978	0.223097	0.252375	0.88399	0.376702	0.603008	NOT	303	405	250	370	352	122	131	300
CCDC71	50.5731	-0.539587	0.342028	-1.57761	0.114655	0.295771	NOT	94	107	60	77	52	14	17	54
CCDC71L	76.2607	0.659381	0.301234	2.18893	0.0286017	0.11843	NOT	71	96	66	92	69	45	54	123
CCDC77	15.7999	-0.613976	0.63998	-0.959367	0.337374	0.566081	NOT	19	34	31	22	14	0	7	21
CCDC8	26.9745	0.48147	0.436441	1.10317	0.269953	0.496865	NOT	29	41	20	34	24	11	25	33
CCDC80	103.057	0.382548	0.392597	0.974404	0.329856	0.558789	NOT	205	131	39	128	105	67	72	106
CCDC81	14.2585	-1.50415	0.72295	-2.08057	0.0374735	0.142944	DOWN	19	31	29	33	6	0	10	4
CCDC82	39.8331	-0.349878	0.385479	-0.907643	0.364067	0.590728	NOT	61	92	44	56	23	32	9	49
CCDC84	35.0699	-0.104274	0.44674	-0.23341	0.815443	0.908625	NOT	44	88	57	18	36	15	21	32
CCDC85A	15.2306	0.286717	0.564839	0.507607	0.611729	0.782162	NOT	12	26	11	27	9	16	5	23
CCDC85B	215.133	0.247238	0.228774	1.08071	0.279828	0.507634	NOT	281	363	170	288	240	163	94	243
CCDC85C	527.316	0.340979	0.226797	1.50345	0.132723	0.324071	NOT	695	868	594	459	672	425	182	643
CCDC86	50.9093	0.411342	0.378083	1.08797	0.276609	0.50449	NOT	71	71	34	66	70	28	39	36
CCDC88A	51.6557	0.0386608	0.375071	0.103076	0.917903	0.961867	NOT	65	109	39	74	58	18	34	52
CCDC88B	140.699	0.106314	0.288966	0.367913	0.712938	0.847423	NOT	263	164	210	111	136	108	60	154
CCDC88C	245.126	-0.586852	0.211218	-2.77842	0.00546238	0.03696	NOT	336	522	381	387	167	114	109	213
CCDC9	443.507	0.0585172	0.259669	0.225353	0.821705	0.911249	NOT	403	643	703	607	368	344	186	522
CCDC90B	55.1772	0.614151	0.331253	1.85402	0.0637357	0.203187	NOT	62	48	61	64	42	48	36	76
CCDC91	47.1707	0.271451	0.37961	0.715078	0.474561	0.685078	NOT	57	55	56	64	71	19	32	37
CCDC92	38.7543	-0.470059	0.419557	-1.12037	0.262557	0.488653	NOT	55	80	25	89	29	21	17	33
CCDC93	71.0566	-0.154789	0.30938	-0.500318	0.616851	0.785893	NOT	122	102	113	76	68	26	35	87
CCDC94	144.231	-0.443679	0.296295	-1.49743	0.134283	0.325764	NOT	233	298	157	241	149	106	35	99
CCDC97	408.283	0.191098	0.231915	0.824001	0.409939	0.632448	NOT	664	708	352	432	432	354	155	434
CCER2	65.2008	0.154148	0.324554	0.474954	0.63482	0.797687	NOT	74	102	93	69	51	63	37	49
CCHCR1	202.495	-0.434969	0.26597	-1.63541	0.101963	0.275483	NOT	285	348	361	276	143	90	120	155
CCK	77.1654	-0.867141	0.451049	-1.9225	0.0545434	0.183149	NOT	228	48	171	90	60	32	23	60
CCL11	70.8268	1.69224	0.35216	4.80533	1.54495e-06	8.39769e-05	UP	27	38	58	56	114	75	42	113
CCL14	69.1813	0.356356	0.602668	0.591298	0.554321	0.742775	NOT	135	48	15	131	71	27	73	42
CCL19	295.666	1.05777	0.303363	3.48683	0.000488779	0.0063713	NOT	398	150	241	252	412	223	194	431
CCL2	246.552	0.9241	0.321459	2.8747	0.00404409	0.0299383	NOT	233	165	203	311	369	123	178	355
CCL20	152.834	-0.107791	0.506923	-0.212638	0.831609	0.917668	NOT	357	125	246	137	149	17	96	213
CCL21	322.523	-1.81687	0.458739	-3.96058	7.47676e-05	0.00156562	DOWN	610	619	163	1318	119	101	61	168
CCL24	55.0792	1.04515	0.424393	2.46269	0.0137898	0.0718112	NOT	83	38	24	54	44	67	27	94
CCL25	3608.32	-0.568506	0.224506	-2.53225	0.0113332	0.0626247	NOT	6218	8979	5084	4140	3289	2262	1029	2640
CCL26	34.3369	-0.365486	0.705245	-0.518241	0.60429	0.777415	NOT	18	89	17	90	8	48	11	15
CCL28	48.6549	-0.724543	0.45701	-1.5854	0.112876	0.293135	NOT	117	80	65	76	61	6	14	45
CCL4	10.3923	1.5438	0.674521	2.28873	0.0220948	0.0982342	UP	17	5	3	5	22	7	7	14
CCL5	849.727	1.13041	0.391322	2.88869	0.00386848	0.0289305	NOT	1088	524	870	436	1573	312	432	1717
CCL8	18.4118	1.65962	0.710506	2.33582	0.0195006	0.0906012	UP	32	4	9	5	43	10	5	43
CCM2	285.296	0.305318	0.217162	1.40594	0.159741	0.359817	NOT	431	406	298	287	297	269	127	279
CCM2L	20.6595	-0.587304	0.598929	-0.98059	0.326795	0.555835	NOT	27	22	12	70	17	9	9	16
CCNA2	39.8144	0.384923	0.409176	0.940726	0.346846	0.575387	NOT	72	42	27	50	24	32	22	62
CCNB1	62.511	-0.840981	0.342966	-2.45208	0.0142034	0.0733341	NOT	161	106	74	102	37	21	32	44
CCNB1IP1	103.73	-0.158084	0.273767	-0.577439	0.563643	0.749711	NOT	135	149	161	151	84	47	50	131
CCNB2	134.43	-1.55897	0.358064	-4.35389	1.33741e-05	0.00042675	DOWN	281	328	275	229	90	13	38	81
CCNB3	39.5434	-0.736664	0.7152	-1.03001	0.303005	0.531002	NOT	74	87	68	45	20	0	39	17
CCNC	271.99	-0.117808	0.274647	-0.428942	0.667965	0.820376	NOT	458	444	419	255	318	102	113	329
CCND1	887.139	-0.0634194	0.23511	-0.269744	0.787357	0.892903	NOT	1532	1267	863	1345	1067	420	411	878
CCND2	26.4259	0.492252	0.462361	1.06465	0.287035	0.514475	NOT	48	21	36	16	41	15	14	29
CCND3	772.531	-0.319775	0.244074	-1.31015	0.190144	0.401558	NOT	1601	1148	1138	867	849	388	234	805
CCNDBP1	132.469	0.220689	0.313292	0.70442	0.481171	0.690683	NOT	181	172	231	90	141	83	54	188
CCNE1	21.9075	0.0958615	0.487931	0.196465	0.844246	0.9238	NOT	32	27	17	41	19	16	5	36
CCNE2	9.79666	0.322395	0.682306	0.472507	0.636565	0.798573	NOT	13	19	15	2	6	8	7	11
CCNF	148.962	-1.16027	0.239352	-4.84754	1.25001e-06	7.43861e-05	NOT	240	373	246	279	71	67	51	89
CCNG1	481.938	1.42956	0.210202	6.80089	1.03977e-11	5.17101e-09	UP	417	407	313	310	628	340	425	763
CCNG2	77.8429	0.76811	0.271611	2.82798	0.00468422	0.0331611	NOT	88	110	61	65	79	51	51	129
CCNH	124.117	-0.0620825	0.268826	-0.230939	0.817362	0.909591	NOT	133	224	204	139	103	97	48	132
CCNI	689.844	0.743914	0.162941	4.56555	4.98179e-06	0.000204807	NOT	821	849	527	677	817	555	400	939
CCNJ	47.8209	-0.54873	0.351427	-1.56143	0.118422	0.301259	NOT	100	104	56	62	40	13	19	55
CCNJL	33.5807	-0.623356	0.361031	-1.7266	0.0842396	0.244228	NOT	68	64	47	47	32	11	16	23
CCNK	329.145	0.165447	0.176923	0.935138	0.349717	0.57794	NOT	426	474	424	382	314	226	184	341
CCNL1	8.49029	-0.676024	0.73542	-0.919235	0.357973	0.585341	NOT	7	11	25	13	10	4	1	7
CCNL2	597.579	-0.702787	0.225615	-3.11499	0.00183951	0.017111	NOT	909	1214	935	1018	418	374	230	333
CCNT1	114.058	-0.352515	0.244161	-1.44378	0.1488	0.345398	NOT	193	252	128	149	79	65	46	126
CCNT2	133.649	-0.790539	0.275532	-2.86914	0.00411591	0.0302928	NOT	255	365	188	153	75	79	53	85
CCNY	656.886	0.374195	0.227778	1.64281	0.100423	0.273218	NOT	872	877	495	921	703	538	290	823
CCNYL1	100.73	1.01544	0.3328	3.0512	0.00227925	0.0198739	NOT	112	95	72	89	146	40	89	143
CCP110	45.8771	-0.0592097	0.392353	-0.150909	0.880047	0.942304	NOT	93	92	42	39	45	37	25	25
CCPG1	61.6766	0.323471	0.326148	0.991793	0.321299	0.549912	NOT	84	96	74	53	66	67	19	64
CCR1	7.74949	0.23162	0.685095	0.338085	0.735299	0.860866	NOT	9	9	14	7	4	6	3	14
CCR10	24.6638	-0.860004	0.700443	-1.2278	0.219522	0.438886	NOT	117	39	14	16	16	9	2	36
CCR5	29.4999	0.671035	0.452234	1.48382	0.137856	0.330929	NOT	44	14	31	33	41	26	17	27
CCR6	6.99361	-0.651621	0.839431	-0.776265	0.437593	0.653947	NOT	20	11	11	7	8	0	1	11
CCR7	7.99082	0.779677	0.787564	0.989985	0.322181	0.550746	NOT	11	6	12	3	14	10	4	2
CCRL2	25.0726	0.328927	0.447552	0.734946	0.462372	0.675678	NOT	30	37	40	17	43	15	10	23
CCS	444.68	-0.334315	0.227866	-1.46715	0.142334	0.336406	NOT	590	961	744	478	455	219	162	436
CCSAP	112.75	0.59645	0.321149	1.85724	0.0632769	0.202072	NOT	152	177	103	80	157	83	32	191
CCSER1	15.1599	1.44487	0.597998	2.41617	0.0156846	0.0777804	UP	15	6	12	11	16	5	14	36
CCSER2	160.476	0.262762	0.188723	1.39232	0.163827	0.366001	NOT	216	248	166	182	161	121	80	184
CCT2	422.602	0.228553	0.203516	1.12303	0.261427	0.487266	NOT	688	671	376	452	383	274	228	542
CCT3	388.268	0.138122	0.194514	0.710087	0.47765	0.687725	NOT	556	711	368	447	381	224	197	488
CCT4	477.678	-0.0886791	0.169824	-0.522184	0.601542	0.775672	NOT	732	868	516	631	414	305	239	464
CCT5	633.955	-0.4894	0.216681	-2.25862	0.0239072	0.103613	NOT	1292	1260	823	785	516	272	215	727
CCT6A	536.753	-0.497072	0.286782	-1.73327	0.0830476	0.241882	NOT	1156	964	594	794	461	147	253	562
CCT7	876.362	-0.726523	0.183116	-3.96756	7.26119e-05	0.001532	NOT	1768	1580	1157	1532	713	405	276	717
CCT8	304.47	-0.44687	0.169496	-2.63646	0.00837749	0.0501317	NOT	540	581	418	414	221	173	127	277
CCZ1	95.5781	0.138458	0.274584	0.504247	0.614088	0.783936	NOT	102	181	133	94	111	50	43	121
CD101	33.6677	0.443944	0.512617	0.866035	0.386471	0.612312	NOT	47	19	66	21	37	33	9	48
CD109	10.262	-1.16109	0.682604	-1.70097	0.0889484	0.25288	NOT	18	24	14	23	2	2	3	14
CD14	29.8912	-0.0285678	0.460251	-0.06207	0.950507	0.976618	NOT	83	37	29	22	28	15	13	40
CD151	822.009	0.000665123	0.276589	0.00240473	0.998081	0.998792	NOT	1129	1577	859	1044	773	845	280	608
CD163	54.9481	0.686477	0.39975	1.71726	0.0859309	0.247233	NOT	57	70	78	27	46	31	50	73
CD164	324.39	-0.200749	0.250382	-0.801771	0.422685	0.642635	NOT	684	545	299	420	275	246	115	310
CD180	8.24744	1.46633	0.673014	2.17876	0.0293496	0.120487	UP	4	6	9	5	18	8	4	9
CD1D	36.8427	1.0243	0.514996	1.98895	0.0467071	0.164772	NOT	49	31	49	6	39	28	22	70
CD2	134.716	1.19066	0.271664	4.38286	1.17133e-05	0.000388351	NOT	132	100	134	83	177	91	98	226
CD200	176.75	-0.0883626	0.456686	-0.193486	0.846578	0.924741	NOT	182	274	333	198	86	88	179	83
CD200R1	7.60483	0.357271	0.722495	0.494496	0.620956	0.78823	NOT	13	4	12	7	13	6	3	5
CD200R1L	28.9649	0.958705	0.774447	1.23792	0.215745	0.434832	NOT	14	22	68	1	57	20	7	50
CD209	97.5615	1.2722	0.484351	2.62661	0.00862393	0.0509929	UP	173	68	19	64	130	57	94	135
CD22	9.78727	0.400143	0.633218	0.63192	0.527439	0.726181	NOT	15	13	7	13	16	3	3	17
CD226	12.2309	1.43027	0.845148	1.69232	0.0905841	0.255444	NOT	16	4	16	0	10	5	12	29
CD244	35.3274	0.645185	0.459881	1.40294	0.160635	0.361305	NOT	58	36	44	17	61	21	10	57
CD247	491.889	0.566522	0.34238	1.65466	0.0979933	0.268455	NOT	658	498	714	307	749	235	185	855
CD248	43.1514	-0.95091	0.507547	-1.87354	0.0609937	0.197517	NOT	131	80	16	93	26	23	11	33
CD27	24.3466	0.279922	0.479654	0.583591	0.559495	0.746619	NOT	13	36	41	29	33	12	15	23
CD274	33.3194	-0.59636	0.558005	-1.06874	0.285188	0.512511	NOT	39	26	74	69	29	5	22	23
CD276	157.659	0.373146	0.356412	1.04695	0.295122	0.522465	NOT	275	256	126	126	148	195	44	170
CD2AP	569.763	0.762425	0.161354	4.72518	2.29911e-06	0.000111941	NOT	657	706	529	463	637	434	350	827
CD2BP2	305.988	0.0239711	0.205938	0.116399	0.907336	0.956471	NOT	377	463	438	387	327	230	127	280
CD300A	16.1713	0.802978	0.535655	1.49906	0.133859	0.325189	NOT	23	22	12	11	28	6	6	32
CD300C	17.0897	0.520196	0.509445	1.0211	0.307205	0.535532	NOT	24	17	15	22	26	17	3	21
CD300LF	29.0779	-0.318923	0.46263	-0.689369	0.490591	0.69873	NOT	42	27	65	37	23	24	12	18
CD300LG	12.189	-0.981432	0.569978	-1.72188	0.085092	0.245831	NOT	23	15	23	26	7	4	4	11
CD302	15.6201	0.864115	0.601998	1.43541	0.15117	0.348921	NOT	17	25	19	3	18	12	5	34
CD320	85.93	0.143547	0.390363	0.367728	0.713076	0.847423	NOT	210	120	75	61	120	40	30	115
CD34	72.8909	-0.121703	0.364207	-0.334159	0.738259	0.8628	NOT	138	84	71	124	70	60	16	82
CD36	72.2254	0.616185	0.408694	1.50769	0.131633	0.322441	NOT	108	80	54	72	46	66	72	50
CD37	75.3364	1.06499	0.290168	3.67024	0.000242318	0.00380415	NOT	73	70	57	69	107	41	51	130
CD38	58.0077	0.286496	0.352026	0.813851	0.415731	0.63742	NOT	67	63	92	63	65	30	22	97
CD3D	20.3713	2.78307	0.640884	4.34255	1.40838e-05	0.00044471	UP	10	2	8	8	36	8	12	70
CD3E	149.916	0.895431	0.426853	2.09775	0.0359273	0.138978	NOT	163	122	227	60	258	58	77	271
CD3EAP	118.551	-0.692758	0.294673	-2.35094	0.018726	0.0880051	NOT	220	190	177	216	80	38	40	140
CD3G	55.6539	1.81806	0.465133	3.90869	9.2797e-05	0.00183291	UP	38	31	51	15	100	20	44	124
CD4	59.3337	-0.149363	0.359387	-0.415604	0.6777	0.826282	NOT	141	64	80	61	62	37	18	67
CD40	55.9269	0.018638	0.427263	0.0436218	0.965206	0.984077	NOT	49	64	125	57	40	51	31	41
CD44	153.294	-0.695212	0.270517	-2.56993	0.0101718	0.0577895	NOT	345	303	207	202	120	61	78	90
CD46	912.865	0.633044	0.328421	1.92754	0.0539128	0.181688	NOT	1051	1094	937	869	784	1353	388	733
CD47	319.053	-1.18171	0.249212	-4.7418	2.11829e-06	0.000104972	NOT	708	763	555	448	220	95	124	151
CD48	60.5559	0.649425	0.343901	1.8884	0.0589716	0.193696	NOT	99	49	68	44	63	52	28	94
CD5	126.214	0.58512	0.345922	1.69148	0.0907446	0.255741	NOT	158	117	205	71	183	81	59	172
CD52	277.553	0.162905	0.426732	0.381749	0.702648	0.840773	NOT	352	308	570	189	400	66	123	413
CD53	75.3076	1.2302	0.32573	3.77674	0.000158897	0.00276235	UP	85	66	58	43	136	40	45	129
CD55	25.1451	-1.00316	0.430491	-2.33028	0.0197916	0.0913484	NOT	58	50	32	44	16	9	13	11
CD58	19.9656	-0.218422	0.447133	-0.488495	0.625199	0.791229	NOT	39	25	29	26	20	8	7	26
CD59	154.342	-0.884741	0.429434	-2.06025	0.0393747	0.147119	NOT	230	365	86	426	87	64	80	79
CD5L	12.4511	1.51455	0.638349	2.3726	0.0176634	0.0845657	UP	3	14	8	10	16	9	16	10
CD6	92.055	0.261399	0.42044	0.621728	0.534121	0.730221	NOT	110	100	179	65	138	26	52	112
CD63	671.084	-0.776627	0.209104	-3.71407	0.000203954	0.00334913	NOT	1398	1514	742	1106	477	372	223	454
CD68	40.4094	0.83687	0.381287	2.19486	0.0281739	0.117041	NOT	68	39	33	23	41	40	20	63
CD7	8.48528	0.361271	0.697762	0.517757	0.604628	0.777562	NOT	6	11	14	10	16	2	3	12
CD72	16.9305	0.569292	0.512563	1.11068	0.266707	0.493936	NOT	15	13	18	27	26	15	7	16
CD74	8260.48	-0.0743349	0.297548	-0.249825	0.802723	0.902391	NOT	16167	7454	12532	9789	10396	4242	2772	9395
CD79A	15.6777	0.689071	0.658183	1.04693	0.295132	0.522465	NOT	41	8	13	5	16	8	13	22
CD79B	25.1562	-0.818977	0.712956	-1.14871	0.250677	0.474858	NOT	95	30	39	18	38	2	2	26
CD81	507.953	-0.475476	0.228436	-2.08144	0.0373938	0.142777	NOT	852	1078	538	838	374	358	160	436
CD82	1314.26	0.25786	0.229192	1.12508	0.260555	0.486004	NOT	1774	1920	1574	1371	1459	1246	435	1420
CD83	26.9635	0.726923	0.488056	1.48943	0.136375	0.329063	NOT	57	14	22	19	33	25	15	31
CD84	30.7083	-0.0728071	0.372991	-0.195198	0.845238	0.924159	NOT	58	34	39	41	24	21	14	34
CD86	165.122	0.00574072	0.259239	0.0221445	0.982333	0.991017	NOT	317	215	224	159	185	95	63	196
CD8A	60.7145	1.22867	0.385948	3.1835	0.00145507	0.0145376	UP	73	35	63	28	83	36	42	114
CD8B	26.1328	-0.236482	0.61537	-0.384293	0.700761	0.839947	NOT	41	9	77	20	18	16	13	26
CD9	208.375	-0.367687	0.263477	-1.39552	0.16286	0.364192	NOT	367	375	189	373	190	143	72	163
CD93	86.4778	-1.04478	0.424128	-2.46335	0.0137647	0.0717339	NOT	166	159	77	233	33	64	26	40
CD96	32.4505	1.20905	0.624546	1.93589	0.0528809	0.179689	NOT	21	15	54	14	64	6	18	70
CD99	1129.14	-0.905027	0.208956	-4.33117	1.48316e-05	0.000465157	NOT	1968	2131	1498	2466	778	522	336	851
CD99L2	79.7048	-0.0447187	0.351557	-0.127202	0.898781	0.952571	NOT	107	131	53	155	57	62	37	84
CDA	27.4219	0.630445	0.784517	0.803609	0.421623	0.642211	NOT	61	2	46	7	42	7	15	49
CDADC1	148.42	-0.0566474	0.240862	-0.235187	0.814064	0.907957	NOT	243	179	219	186	141	84	64	176
CDAN1	165.398	-0.952701	0.286591	-3.32425	0.000886578	0.00998154	NOT	240	368	284	303	82	88	73	81
CDC123	482.2	-0.769574	0.226888	-3.39187	0.000694175	0.00829021	NOT	1064	914	781	627	433	201	123	420
CDC14A	108.802	0.0705795	0.350904	0.201137	0.840592	0.921781	NOT	129	171	169	113	69	121	55	74
CDC14B	133.979	0.624379	0.201956	3.09166	0.00199043	0.0181155	NOT	151	175	127	132	149	120	71	166
CDC16	194.496	-0.234095	0.246503	-0.949663	0.342283	0.571293	NOT	248	344	311	250	140	107	116	167
CDC20	399.049	-1.61059	0.227288	-7.08611	1.37938e-12	1.0671e-09	DOWN	957	1020	670	713	236	81	100	213
CDC20B	14.4363	-0.0819945	0.665444	-0.123218	0.901935	0.954634	NOT	7	10	33	26	13	13	7	8
CDC23	13.011	0.73958	0.643655	1.14903	0.250543	0.474837	NOT	9	8	14	20	8	21	6	12
CDC25A	66.3112	-0.214692	0.255495	-0.840301	0.40074	0.624964	NOT	114	109	84	88	55	36	30	72
CDC25B	160.868	0.169868	0.269221	0.630962	0.528065	0.726899	NOT	172	259	207	197	181	65	98	193
CDC25C	16.4607	0.24835	0.489355	0.507506	0.6118	0.782162	NOT	20	25	18	19	19	8	14	11
CDC26	1050.17	0.872795	0.278583	3.13298	0.00173039	0.0163917	NOT	1085	1474	941	687	1229	1338	388	1320
CDC27	165.45	-0.200248	0.22525	-0.889003	0.374001	0.600273	NOT	311	281	228	170	146	96	63	189
CDC34	697.364	0.228448	0.230683	0.990311	0.322022	0.550714	NOT	997	1067	655	859	736	668	253	704
CDC37	538.276	-0.036977	0.202629	-0.182486	0.855201	0.929579	NOT	836	920	564	722	642	279	216	593
CDC37L1	134.289	0.379325	0.256366	1.47962	0.138974	0.332166	NOT	174	201	178	97	128	86	84	171
CDC40	100.444	0.727619	0.271992	2.67515	0.00746957	0.0461463	NOT	104	90	113	102	101	99	63	114
CDC42	739.646	0.829244	0.232332	3.56923	0.000358036	0.00512399	NOT	885	644	659	726	984	423	476	1149
CDC42BPA	152.457	0.540774	0.253909	2.1298	0.0331883	0.131749	NOT	190	229	129	146	120	133	108	172
CDC42BPB	739.653	-0.0588274	0.259498	-0.226697	0.820659	0.91095	NOT	780	1306	1041	1025	582	685	315	588
CDC42BPG	165.815	0.778142	0.256472	3.03402	0.00241316	0.0206282	NOT	174	230	155	129	246	125	62	268
CDC42EP1	613.644	-0.18933	0.263191	-0.719364	0.471917	0.683102	NOT	1123	1417	468	740	563	420	215	630
CDC42EP2	112.413	-0.219499	0.301629	-0.727712	0.46679	0.679023	NOT	210	118	167	162	105	48	48	135
CDC42EP3	170.384	-1.09604	0.418873	-2.61665	0.00887984	0.0521518	NOT	184	380	147	548	86	74	73	80
CDC42EP4	1342.75	-0.00811323	0.217821	-0.0372473	0.970288	0.986295	NOT	2019	1568	1974	1751	1182	1063	556	1359
CDC42EP5	717.651	-0.387906	0.247319	-1.56844	0.116778	0.298757	NOT	1476	1491	723	917	728	304	237	792
CDC42SE1	434.516	0.622964	0.20311	3.06712	0.00216131	0.0192229	NOT	557	417	457	440	472	316	248	628
CDC45	115.022	-0.64088	0.231178	-2.77224	0.00556725	0.0374512	NOT	178	234	193	170	100	47	45	91
CDC5L	168.717	0.808313	0.208919	3.86902	0.000109273	0.00205525	NOT	198	224	144	124	194	152	89	244
CDC6	23.6642	-0.590061	0.437174	-1.34972	0.177106	0.384623	NOT	32	45	53	25	14	13	11	19
CDC7	47.5507	-0.965029	0.395571	-2.43958	0.0147042	0.0746741	NOT	54	96	95	98	40	11	13	43
CDC73	102.225	0.889583	0.292372	3.04265	0.00234509	0.0202576	NOT	145	74	75	99	129	75	66	147
CDCA2	54.7174	-0.939636	0.305061	-3.08016	0.00206889	0.0186106	NOT	102	117	80	101	31	20	16	54
CDCA3	100.311	-0.623114	0.250802	-2.48449	0.0129738	0.0691357	NOT	194	161	143	168	79	43	45	76
CDCA4	130.55	-1.43115	0.263177	-5.43797	5.38915e-08	5.36028e-06	DOWN	322	292	217	229	62	65	22	73
CDCA5	103.716	-1.13566	0.272508	-4.16742	3.08068e-05	0.000806364	NOT	185	202	153	237	63	37	37	62
CDCA7	327.1	-1.0677	0.291121	-3.66755	0.000244886	0.00382679	NOT	743	842	425	492	241	74	139	195
CDCA7L	44.276	0.698968	0.4836	1.44534	0.148361	0.344724	NOT	67	46	26	50	71	10	20	91
CDCA8	135.993	-1.00502	0.222452	-4.51792	6.24489e-06	0.000244958	NOT	266	270	233	228	84	51	54	87
CDCP1	64.4131	-0.187677	0.432681	-0.433754	0.664467	0.819258	NOT	48	121	131	73	37	64	31	40
CDCP2	6.94123	-0.476077	0.955245	-0.498382	0.618215	0.786495	NOT	5	18	2	20	4	0	4	11
CDH1	1599.27	-0.248268	0.360081	-0.68948	0.490521	0.698702	NOT	2960	2170	2480	1918	1013	1841	363	1224
CDH11	37.2961	-0.633194	0.538012	-1.17691	0.23923	0.462085	NOT	50	97	18	88	26	9	26	23
CDH17	1405.54	0.59322	0.279685	2.12103	0.0339193	0.133955	NOT	1728	1268	1680	1408	1463	1636	518	1682
CDH19	15.6043	0.867361	0.794068	1.0923	0.274701	0.502259	NOT	15	21	0	25	12	12	19	10
CDH2	10.163	-0.718609	0.714394	-1.0059	0.314463	0.543042	NOT	14	33	3	22	5	5	5	8
CDH23	8.97847	-0.103391	0.910662	-0.113534	0.909607	0.957467	NOT	12	16	17	6	0	16	3	4
CDH24	32.2485	-0.554953	0.48117	-1.15334	0.248771	0.47306	NOT	57	38	70	44	46	12	5	27
CDH3	11.6234	-1.87838	0.919973	-2.04178	0.0411733	0.151857	DOWN	20	13	5	57	6	5	3	0
CDH4	7.86629	-0.805757	0.779713	-1.0334	0.301416	0.529362	NOT	13	14	13	15	8	8	0	2
CDH5	25.2277	-1.05708	0.602672	-1.75399	0.0794314	0.235738	NOT	65	59	7	60	11	15	10	11
CDH6	8.44331	-0.375055	0.830524	-0.451589	0.651565	0.809732	NOT	7	8	15	20	5	0	5	14
CDHR2	2883.68	0.295629	0.416355	0.710041	0.477679	0.687725	NOT	3068	4560	4360	2353	2084	4535	773	1953
CDHR4	7.96703	-1.0898	0.751002	-1.45112	0.146745	0.342241	NOT	13	13	8	24	5	6	2	2
CDHR5	4806.53	-0.00967047	0.350199	-0.0276142	0.97797	0.989325	NOT	5913	10034	6305	4896	3765	5918	1202	3685
CDIP1	1004.83	0.807348	0.2605	3.09923	0.00194026	0.0177644	NOT	1140	1473	735	793	1205	1188	381	1272
CDIPT	200.955	0.847191	0.370925	2.284	0.0223717	0.0989914	NOT	244	338	104	143	191	296	76	225
CDK1	93.9705	-0.484049	0.292672	-1.65389	0.098149	0.268749	NOT	207	166	142	98	75	34	40	102
CDK10	401.814	-0.0883447	0.247297	-0.357241	0.720912	0.851458	NOT	507	628	613	517	313	319	218	289
CDK11B	322.113	-0.14022	0.186071	-0.753584	0.451099	0.666107	NOT	468	480	416	487	305	211	137	304
CDK12	156.102	0.0335414	0.228996	0.146472	0.883549	0.944276	NOT	231	220	201	200	189	85	60	182
CDK13	271.814	-0.23851	0.244438	-0.975748	0.329189	0.558214	NOT	379	548	387	328	207	233	90	241
CDK14	26.8583	0.615158	0.431337	1.42617	0.15382	0.352617	NOT	24	59	23	16	32	21	18	28
CDK16	962.018	0.0117082	0.172379	0.0679212	0.945848	0.975468	NOT	1325	1498	1273	1194	927	657	364	1160
CDK17	59.8342	-0.0508439	0.376527	-0.135034	0.892585	0.94887	NOT	84	119	40	97	42	54	32	43
CDK18	519.859	0.114828	0.241353	0.475765	0.634242	0.797311	NOT	645	860	768	493	477	464	258	418
CDK19	107.346	0.169771	0.283227	0.599417	0.548895	0.739919	NOT	117	190	165	90	97	93	48	113
CDK2	112.557	-0.964357	0.266592	-3.61736	0.000297626	0.0044373	NOT	215	185	168	243	69	48	33	92
CDK20	30.5541	-0.0592872	0.595997	-0.0994756	0.920761	0.96345	NOT	27	78	11	61	34	35	7	16
CDK2AP1	191.998	0.262883	0.297432	0.883842	0.376781	0.603067	NOT	308	262	127	272	205	97	131	206
CDK2AP2	439.532	0.144358	0.255775	0.564395	0.572485	0.756271	NOT	878	625	334	509	467	264	199	554
CDK3	14.3764	-0.0158452	0.616215	-0.0257138	0.979486	0.989776	NOT	30	25	14	13	19	17	3	5
CDK4	261.685	0.533171	0.262526	2.03093	0.0422623	0.154075	NOT	404	365	170	267	333	143	148	373
CDK5	80.311	0.403011	0.293169	1.37467	0.169233	0.373349	NOT	134	119	53	84	94	66	41	83
CDK5R1	13.9635	-0.647563	0.625345	-1.03553	0.300422	0.528011	NOT	24	34	5	32	9	6	8	9
CDK5RAP1	31.594	-0.946444	0.465528	-2.03306	0.0420468	0.153594	NOT	61	76	45	53	22	22	1	27
CDK5RAP2	124.638	-0.563794	0.31096	-1.81308	0.0698202	0.216411	NOT	175	279	171	200	77	104	46	68
CDK5RAP3	531.16	-0.272308	0.238145	-1.14346	0.252849	0.47722	NOT	724	1022	971	508	471	363	194	482
CDK6	240.177	-0.768333	0.217293	-3.53594	0.000406334	0.00561887	NOT	366	468	411	419	182	108	66	221
CDK7	74.9506	-1.1876	0.305615	-3.88594	0.000101937	0.00196875	NOT	131	139	171	128	53	22	18	56
CDK8	88.018	-0.0478262	0.270893	-0.17655	0.859862	0.931194	NOT	96	195	106	107	90	47	41	97
CDK9	242.151	0.0677608	0.200431	0.338075	0.735307	0.860866	NOT	306	349	330	309	234	142	137	249
CDKAL1	20.695	-0.153599	0.474732	-0.323549	0.74628	0.867807	NOT	23	29	23	44	21	9	7	28
CDKL1	13.6692	1.41451	0.506044	2.79522	0.00518636	0.0355589	UP	12	14	11	5	21	12	9	21
CDKL2	10.4478	0.00194853	0.605184	0.00321972	0.997431	0.998792	NOT	16	9	18	14	13	7	2	13
CDKN1A	302.739	0.890802	0.337679	2.63801	0.00833938	0.0499466	NOT	337	166	257	374	408	153	205	499
CDKN1B	171.29	0.555973	0.235551	2.3603	0.01826	0.0866599	NOT	203	270	127	180	154	142	96	243
CDKN1C	47.2479	0.450997	0.485615	0.928715	0.353037	0.581092	NOT	85	46	23	66	41	67	20	31
CDKN2AIP	88.5343	0.549312	0.262714	2.09091	0.0365361	0.14042	NOT	110	87	100	94	85	63	58	117
CDKN2AIPNL	168.387	0.117927	0.220786	0.534123	0.593256	0.770289	NOT	307	246	174	175	160	113	86	186
CDKN2B	361.216	1.20487	0.226664	5.31564	1.06284e-07	9.30819e-06	UP	316	347	328	220	505	235	239	648
CDKN2C	50.5389	0.298812	0.345513	0.864837	0.387128	0.61304	NOT	94	70	34	57	57	26	28	67
CDKN2D	138.977	-0.353545	0.225571	-1.56734	0.117036	0.299196	NOT	204	238	193	222	103	69	61	151
CDKN3	28.6368	0.167566	0.442843	0.378387	0.705143	0.842185	NOT	36	68	25	26	20	12	18	46
CDON	34.6201	-1.28119	0.651431	-1.96674	0.0492134	0.170812	DOWN	39	100	54	78	15	33	6	2
CDPF1	536.089	0.191572	0.25662	0.746521	0.455353	0.669495	NOT	728	1021	533	547	436	558	228	507
CDR2	563.834	0.710509	0.281309	2.52573	0.0115459	0.0635735	NOT	536	507	567	698	706	648	237	584
CDR2L	60.5545	0.227251	0.380391	0.597415	0.55023	0.740772	NOT	102	67	40	99	66	31	24	97
CDRT1	174.124	-0.0286346	0.376267	-0.0761016	0.939338	0.972512	NOT	233	183	416	113	145	109	85	198
CDRT4	11.0665	1.22589	0.848023	1.44559	0.148292	0.344621	NOT	6	5	8	15	4	17	14	2
CDS1	506.445	0.752127	0.318054	2.36478	0.0180408	0.0858924	NOT	604	534	513	429	474	743	209	474
CDS2	176.102	-0.390605	0.214612	-1.82005	0.0687513	0.214271	NOT	308	303	260	234	126	124	62	162
CDT1	223.951	-0.784137	0.248954	-3.14973	0.00163424	0.0157378	NOT	384	408	275	486	164	87	79	193
CDV3	180.527	1.53722	0.270822	5.67615	1.3776e-08	1.84453e-06	UP	173	86	117	127	272	160	127	286
CDX1	305.311	0.0887533	0.299414	0.296423	0.766907	0.879506	NOT	540	465	297	354	260	302	79	369
CDX2	3074.34	-0.0861537	0.172315	-0.499977	0.617092	0.785893	NOT	4718	5399	3907	3620	2705	2318	1132	3271
CDYL	133.99	-0.113423	0.266714	-0.425262	0.670645	0.821638	NOT	207	166	212	172	155	68	67	111
CDYL2	33.5904	0.455405	0.421537	1.08034	0.279989	0.507795	NOT	48	23	29	52	37	18	23	42
CEACAM1	1014.47	0.00843495	0.237523	0.0355122	0.971671	0.9869	NOT	1429	1376	1443	1283	902	946	369	923
CEACAM18	1583.31	-0.360868	0.28475	-1.26732	0.205043	0.42003	NOT	2155	2601	3399	1573	1288	1235	493	1304
CEACAM19	27.4159	-0.595923	0.464407	-1.28319	0.199425	0.413644	NOT	46	53	28	56	32	19	6	12
CEBPA	869.504	0.491603	0.263072	1.8687	0.0616641	0.198767	NOT	1087	1579	684	772	937	868	301	1161
CEBPB	89.0843	0.533877	0.316359	1.68757	0.0914939	0.25678	NOT	121	75	83	115	83	51	64	126
CEBPD	1765.45	-0.113388	0.308741	-0.367261	0.713424	0.847451	NOT	3677	1734	2908	1692	1921	699	900	1879
CEBPG	311.637	0.128291	0.178506	0.718696	0.472328	0.683465	NOT	468	498	385	312	331	201	137	371
CEBPZ	51.315	0.293473	0.3026	0.96984	0.332126	0.561201	NOT	76	54	60	61	56	34	31	52
CEBPZOS	117.218	0.532566	0.331304	1.60748	0.107949	0.285451	NOT	143	150	86	150	142	45	96	140
CELF1	619.421	0.0953299	0.163693	0.582368	0.560319	0.747217	NOT	786	924	742	841	610	426	307	642
CELF2	65.7339	0.860173	0.342928	2.50832	0.0121307	0.0658047	NOT	73	40	78	61	89	48	32	108
CELF3	28.27	-0.75502	0.451635	-1.67175	0.0945739	0.262358	NOT	69	75	22	37	16	20	10	17
CELF4	15.6892	-1.03934	0.772937	-1.34466	0.178735	0.386798	NOT	45	61	3	17	11	1	8	12
CELSR2	7.51811	0.46005	0.757028	0.607705	0.543383	0.736338	NOT	8	10	3	14	3	7	3	15
CELSR3	16.1997	-0.477553	0.504115	-0.94731	0.343481	0.572176	NOT	22	49	14	23	11	9	7	15
CEND1	43.4996	-1.02679	0.521715	-1.9681	0.049057	0.170524	NOT	54	119	32	119	41	7	20	20
CENPA	106.591	-0.874994	0.237107	-3.69029	0.000224003	0.00358533	NOT	172	222	188	177	80	41	40	73
CENPB	397.025	0.66814	0.198054	3.37353	0.000742103	0.00865476	NOT	528	508	309	373	492	345	182	541
CENPC	36.0213	-0.288546	0.628411	-0.459167	0.646114	0.80634	NOT	72	56	41	51	34	0	21	52
CENPE	80.7238	-1.42231	0.505973	-2.81104	0.00493815	0.0344204	DOWN	177	306	107	94	78	5	25	35
CENPF	111.435	-1.48029	0.27724	-5.33938	9.3265e-08	8.37881e-06	DOWN	252	322	198	155	57	24	32	74
CENPH	27.6398	-0.531068	0.405221	-1.31056	0.190005	0.401552	NOT	35	74	33	41	17	13	15	23
CENPI	23.3194	-0.716504	0.596225	-1.20173	0.229466	0.449815	NOT	58	50	28	28	31	1	12	12
CENPJ	68.8578	-1.23796	0.344475	-3.59374	0.000325965	0.00475793	DOWN	99	145	179	102	28	33	21	42
CENPK	12.2529	0.0120547	0.63474	0.0189915	0.984848	0.992402	NOT	36	16	12	5	10	7	8	12
CENPL	16.4335	-0.232043	0.605793	-0.38304	0.70169	0.84034	NOT	34	48	15	7	9	6	11	20
CENPM	40.181	-0.257042	0.412866	-0.62258	0.533561	0.730105	NOT	75	86	37	49	50	19	23	18
CENPN	40.1378	0.088808	0.474515	0.187155	0.851539	0.927608	NOT	79	66	32	42	37	7	33	49
CENPO	64.3787	-0.434642	0.326305	-1.33201	0.182856	0.392503	NOT	116	133	74	92	64	17	32	61
CENPQ	43.2202	-0.0577175	0.356946	-0.161698	0.871543	0.937741	NOT	75	59	42	65	43	29	26	27
CENPT	128.784	-1.09503	0.317122	-3.45301	0.00055436	0.00698975	NOT	164	270	256	260	63	67	50	58
CENPU	14.1685	0.45363	0.691401	0.656102	0.511758	0.71441	NOT	24	16	10	15	9	2	20	12
CENPV	234.469	-0.784613	0.205766	-3.81312	0.000137222	0.00246077	NOT	448	565	320	338	187	88	82	192
CENPW	36.9235	-0.537078	0.61134	-0.878525	0.379659	0.605931	NOT	76	97	41	37	19	1	23	53
CENPX	953.996	-0.474694	0.289137	-1.64176	0.10064	0.273393	NOT	2040	2281	1127	903	1041	313	394	829
CEP104	97.3417	-0.656787	0.268204	-2.44883	0.0143321	0.0737252	NOT	168	197	176	116	63	48	48	66
CEP120	105.895	-0.109782	0.266921	-0.411291	0.680859	0.828484	NOT	150	197	150	112	91	65	66	78
CEP128	19.3374	0.876482	0.719487	1.2182	0.223146	0.442511	NOT	22	22	24	8	35	0	17	29
[truncated: 11,926 more rows]
