# Supplementary material for: The Metabolic Pathway of Bile Secretion Is Vulnerable to Salmonella enterica Exposure in Porcine Intestinal Epithelial Cells
Source: Animals (Basel). 2024 Mar 3;14(5):789. doi: 10.3390/ani14050789 (PMC10931422; doi:10.3390/ani14050789)
Supplement: Supplementary file 1 [file animals-14-00789-s001.zip › Table S12. GO term enriched use up and DOWN-regulated genes between Salmonella infection and LPS treated .xlsx]

## Sheet: Up-regulated genes enriched
ID	Description	GeneRatio	BgRatio	pvalue	p.adjust	qvalue	geneID	Count	Ont
GO:0022900	electron transport chain	8/222	59/6899	0.000545475	0.000545475	0.494641	CHCHD2/COX3/CYTB/ND3/ND4/ND4L/SDHC/THAP11	8	BP
GO:0042773	ATP synthesis coupled electron transport	7/222	47/6899	0.000682241	0.000682241	0.494641	CHCHD2/COX3/CYTB/ND3/ND4/ND4L/SDHC	7	BP
GO:0033059	cellular pigmentation	4/222	14/6899	0.000810053	0.000810053	0.494641	BLOC1S3/BLOC1S6/RAB11A/RAB32	4	BP
GO:0030219	megakaryocyte differentiation	4/222	16/6899	0.00140002	0.00140002	0.494641	CDKN2B/LOX/MTURN/RAB7B	4	BP
GO:0022904	respiratory electron transport chain	7/222	55/6899	0.00177057	0.00177057	0.494641	CHCHD2/COX3/CYTB/ND3/ND4/ND4L/SDHC	7	BP
GO:0042775	mitochondrial ATP synthesis coupled electron transport	6/222	43/6899	0.00233469	0.00233469	0.494641	CHCHD2/COX3/CYTB/ND3/ND4/SDHC	6	BP
GO:0006091	generation of precursor metabolites and energy	13/222	166/6899	0.00258838	0.00258838	0.494641	CHCHD2/COX3/CYTB/IDH3A/ND3/ND4/ND4L/OXCT1/PPP1CC/RPIA/SDHC/THAP11/UGP2	13	BP
GO:0046916	cellular transition metal ion homeostasis	6/222	44/6899	0.00263209	0.00263209	0.494641	ATP6V1A/ATP6V1G1/SLC1A1/SLC30A9/SLC31A1/SLC40A1	6	BP
GO:0043473	pigmentation	5/222	31/6899	0.0028278	0.0028278	0.494641	BLOC1S3/BLOC1S6/RAB11A/RAB32/SNAI2	5	BP
GO:0006119	oxidative phosphorylation	7/222	60/6899	0.0029421	0.0029421	0.494641	CHCHD2/COX3/CYTB/ND3/ND4/ND4L/SDHC	7	BP
GO:0002764	immune response-regulating signaling pathway	10/222	112/6899	0.00312326	0.00312326	0.494641	APPL1/CD180/CD8A/CMKLR1/LSM14A/LY96/MS4A2/MYD88/PLSCR1/RAB7B	10	BP
GO:0009060	aerobic respiration	8/222	77/6899	0.00315454	0.00315454	0.494641	CHCHD2/COX3/CYTB/IDH3A/ND3/ND4/ND4L/SDHC	8	BP
GO:0010876	lipid localization	12/222	151/6899	0.00332543	0.00332543	0.494641	ABHD5/CRABP1/FABP2/HEXB/LOC100511343/PIP4K2A/PLSCR1/PRELID3B/RAB11A/SCP2/SLCO2A1/STARD4	12	BP
GO:0032366	intracellular sterol transport	3/222	10/6899	0.00333607	0.00333607	0.494641	PIP4K2A/RAB11A/STARD4	3	BP
GO:0047496	vesicle transport along microtubule	3/222	11/6899	0.00447901	0.00447901	0.499096	BLOC1S3/BLOC1S6/RAB1A	3	BP
GO:0030833	regulation of actin filament polymerization	6/222	49/6899	0.00456349	0.00456349	0.499096	ARPC5/CAPZA1/PFN2/RDX/TMOD3/TMSB15B	6	BP
GO:1901700	response to oxygen-containing compound	22/222	381/6899	0.00533214	0.00533214	0.499096	ABHD2/APPL1/AQP3/C2CD2L/CASP9/CAT/CD180/CHMP5/CTNNB1/GNA11/GPX1/KLF9/LY96/P2RY12/PDCD4/PID1/PIP4K2A/RGS10/S100A9/SLC1A1/SNAI2/STAT3	22	BP
GO:0015980	energy derivation by oxidation of organic compounds	10/222	122/6899	0.00575823	0.00575823	0.499096	CHCHD2/COX3/CYTB/IDH3A/ND3/ND4/ND4L/PPP1CC/SDHC/UGP2	10	BP
GO:0032365	intracellular lipid transport	3/222	12/6899	0.00583153	0.00583153	0.499096	PIP4K2A/RAB11A/STARD4	3	BP
GO:0030837	negative regulation of actin filament polymerization	4/222	24/6899	0.00668089	0.00668089	0.499096	CAPZA1/RDX/TMOD3/TMSB15B	4	BP
GO:1990868	response to chemokine	4/222	24/6899	0.00668089	0.00668089	0.499096	CCL4/CCL8/CXCR4/LOX	4	BP
GO:1990869	cellular response to chemokine	4/222	24/6899	0.00668089	0.00668089	0.499096	CCL4/CCL8/CXCR4/LOX	4	BP
GO:0016477	cell migration	23/222	413/6899	0.00681284	0.00681284	0.499096	ABHD2/ADAM10/APPL1/ARHGDIB/ARPC5/CCL4/CCL8/CMKLR1/CXCR4/DCX/ENPP2/HEXB/LOX/LTB4R2/MMP9/P2RY12/RAB11A/RAB1A/RAP2B/S100A9/SELL/SNAI2/TMSB15B	23	BP
GO:0002682	regulation of immune system process	23/222	414/6899	0.00700964	0.00700964	0.499096	ADAM10/APPL1/AQP3/ATG12/BLOC1S6/C7/CD180/CD8A/CMKLR1/EVI2B/HCST/ICOS/LOC100520491/LOX/LSM14A/LY96/MS4A2/MTURN/MYD88/P2RY12/PLSCR1/RAB7B/STAT3	23	BP
GO:0033993	response to lipid	13/222	187/6899	0.00711488	0.00711488	0.499096	ABHD2/AQP3/CASP9/CD180/CHMP5/CTNNB1/KLF9/LY96/PDCD4/PID1/S100A9/SNAI2/TAF7	13	BP
GO:0030041	actin filament polymerization	6/222	54/6899	0.00737983	0.00737983	0.499096	ARPC5/CAPZA1/PFN2/RDX/TMOD3/TMSB15B	6	BP
GO:0030149	sphingolipid catabolic process	3/222	13/6899	0.00740295	0.00740295	0.499096	ASAH2/ENPP2/HEXB	3	BP
GO:0034142	toll-like receptor 4 signaling pathway	3/222	13/6899	0.00740295	0.00740295	0.499096	APPL1/LY96/RAB7B	3	BP
GO:0016042	lipid catabolic process	10/222	127/6899	0.00760445	0.00760445	0.499096	ABHD2/ABHD5/ASAH2/CRABP1/ENPP2/HEXB/HPGD/LIPA/OXCT1/PRDX6	10	BP
GO:0008064	regulation of actin polymerization or depolymerization	6/222	55/6899	0.00806668	0.00806668	0.499096	ARPC5/CAPZA1/PFN2/RDX/TMOD3/TMSB15B	6	BP
GO:0030832	regulation of actin filament length	6/222	55/6899	0.00806668	0.00806668	0.499096	ARPC5/CAPZA1/PFN2/RDX/TMOD3/TMSB15B	6	BP
GO:0045333	cellular respiration	8/222	90/6899	0.00814378	0.00814378	0.499096	CHCHD2/COX3/CYTB/IDH3A/ND3/ND4/ND4L/SDHC	8	BP
GO:0019646	aerobic electron transport chain	5/222	40/6899	0.00866612	0.00866612	0.499096	COX3/CYTB/ND3/ND4/SDHC	5	BP
GO:0032272	negative regulation of protein polymerization	4/222	26/6899	0.0089398	0.0089398	0.499096	CAPZA1/RDX/TMOD3/TMSB15B	4	BP
GO:0046503	glycerolipid catabolic process	4/222	26/6899	0.0089398	0.0089398	0.499096	ABHD2/ABHD5/ENPP2/PRDX6	4	BP
GO:0008347	glial cell migration	3/222	14/6899	0.00920101	0.00920101	0.499096	DCX/HEXB/P2RY12	3	BP
GO:0043368	positive T cell selection	3/222	14/6899	0.00920101	0.00920101	0.499096	CD3D/CD3G/STAT3	3	BP
GO:0046466	membrane lipid catabolic process	3/222	14/6899	0.00920101	0.00920101	0.499096	ASAH2/ENPP2/HEXB	3	BP
GO:0055076	transition metal ion homeostasis	6/222	57/6899	0.00957643	0.00957643	0.499096	ATP6V1A/ATP6V1G1/SLC1A1/SLC30A9/SLC31A1/SLC40A1	6	BP
GO:0051650	establishment of vesicle localization	5/222	41/6899	0.00961746	0.00961746	0.499096	AP1AR/BLOC1S3/BLOC1S6/RAB11A/RAB1A	5	BP
GO:0006869	lipid transport	10/222	133/6899	0.0103895	0.0103895	0.526011	CRABP1/FABP2/LOC100511343/PIP4K2A/PLSCR1/PRELID3B/RAB11A/SCP2/SLCO2A1/STARD4	10	BP
GO:0051648	vesicle localization	5/222	43/6899	0.0117309	0.0117309	0.569819	AP1AR/BLOC1S3/BLOC1S6/RAB11A/RAB1A	5	BP
GO:1901701	cellular response to oxygen-containing compound	17/222	292/6899	0.0127284	0.0127284	0.569819	APPL1/C2CD2L/CASP9/CD180/CHMP5/CTNNB1/GNA11/KLF9/LY96/P2RY12/PDCD4/PID1/PIP4K2A/RGS10/SLC1A1/SNAI2/STAT3	17	BP
GO:1905475	regulation of protein localization to membrane	5/222	44/6899	0.0128974	0.0128974	0.569819	ADAM10/APPL1/PDZK1/PID1/SLC1A1	5	BP
GO:0030036	actin cytoskeleton organization	14/222	224/6899	0.0130195	0.0130195	0.569819	AP1AR/ARHGDIB/ARPC5/CAPZA1/CNN3/EPB41/NEBL/PFN2/RAP2B/RDX/RFLNB/SDCBP/TMOD3/TMSB15B	14	BP
GO:0071495	cellular response to endogenous stimulus	19/222	340/6899	0.0130421	0.0130421	0.569819	ABHD2/APPL1/BMP5/CASP9/CDKN2B/CHMP5/CTNNB1/HPGD/KLF9/LOX/P2RY12/PDCD4/PID1/PIP4K2A/SHISA2/SLC1A1/SNAI2/STAT3/TAF7	19	BP
GO:0048870	cell motility	24/222	462/6899	0.0130734	0.0130734	0.569819	ABHD2/ADAM10/AP1AR/APPL1/ARHGDIB/ARPC5/CCL4/CCL8/CMKLR1/CXCR4/DCX/ENPP2/HEXB/LOX/LTB4R2/MMP9/P2RY12/RAB11A/RAB1A/RAP2B/S100A9/SELL/SNAI2/TMSB15B	24	BP
GO:0006749	glutathione metabolic process	4/222	29/6899	0.0131764	0.0131764	0.569819	GPX1/GSTA1/LOC100153094/SLC1A1	4	BP
GO:0051693	actin filament capping	3/222	16/6899	0.0135009	0.0135009	0.571941	CAPZA1/RDX/TMOD3	3	BP
GO:0071396	cellular response to lipid	10/222	139/6899	0.0138919	0.0138919	0.576734	ABHD2/CASP9/CD180/CHMP5/KLF9/LY96/PDCD4/PID1/SNAI2/TAF7	10	BP
GO:0110053	regulation of actin filament organization	7/222	81/6899	0.0150362	0.0150362	0.610831	AP1AR/ARPC5/CAPZA1/PFN2/RDX/TMOD3/TMSB15B	7	BP
GO:0002221	pattern recognition receptor signaling pathway	6/222	63/6899	0.0153018	0.0153018	0.610831	APPL1/CD180/LSM14A/LY96/MYD88/RAB7B	6	BP
GO:0044242	cellular lipid catabolic process	7/222	82/6899	0.0160047	0.0160047	0.620676	ABHD2/ABHD5/ASAH2/CRABP1/ENPP2/HEXB/PRDX6	7	BP
GO:0008154	actin polymerization or depolymerization	6/222	64/6899	0.0164454	0.0164454	0.620676	ARPC5/CAPZA1/PFN2/RDX/TMOD3/TMSB15B	6	BP
GO:0032271	regulation of protein polymerization	6/222	64/6899	0.0164454	0.0164454	0.620676	ARPC5/CAPZA1/PFN2/RDX/TMOD3/TMSB15B	6	BP
GO:0030835	negative regulation of actin filament depolymerization	3/222	18/6899	0.0187662	0.0187662	0.66025	CAPZA1/RDX/TMOD3	3	BP
GO:0043112	receptor metabolic process	3/222	18/6899	0.0187662	0.0187662	0.66025	AP1AR/CHMP5/MYLIP	3	BP
GO:0045058	T cell selection	3/222	18/6899	0.0187662	0.0187662	0.66025	CD3D/CD3G/STAT3	3	BP
GO:0099518	vesicle cytoskeletal trafficking	3/222	18/6899	0.0187662	0.0187662	0.66025	BLOC1S3/BLOC1S6/RAB1A	3	BP
GO:0032956	regulation of actin cytoskeleton organization	8/222	105/6899	0.0194831	0.0194831	0.674047	AP1AR/ARHGDIB/ARPC5/CAPZA1/PFN2/RDX/TMOD3/TMSB15B	8	BP
GO:0002224	toll-like receptor signaling pathway	5/222	49/6899	0.0199093	0.0199093	0.677502	APPL1/CD180/LY96/MYD88/RAB7B	5	BP
GO:0045639	positive regulation of myeloid cell differentiation	4/222	33/6899	0.0205492	0.0205492	0.687998	EVI2B/MTURN/RAB7B/STAT3	4	BP
GO:0030099	myeloid cell differentiation	9/222	127/6899	0.0209163	0.0209163	0.689172	CASP3/CDKN2B/EVI2B/LOX/MTURN/RAB7B/SLC25A5/STAT3/TMOD3	9	BP
GO:0050900	leukocyte migration	8/222	107/6899	0.0215757	0.0215757	0.690106	ADAM10/CCL4/CCL8/CMKLR1/MMP9/P2RY12/S100A9/SELL	8	BP
GO:0070482	response to oxygen levels	6/222	68/6899	0.0216096	0.0216096	0.690106	AQP3/ATP6V1A/ATP6V1G1/CHCHD2/CXCR4/SLC1A1	6	BP
GO:0034219	carbohydrate transmembrane transport	4/222	34/6899	0.0227181	0.0227181	0.714515	APPL1/AQP3/PID1/SLC5A1	4	BP
GO:0007010	cytoskeleton organization	22/222	438/6899	0.0242977	0.0242977	0.752791	AP1AR/ARHGDIB/ARPC5/CAPZA1/CHMP5/CHORDC1/CNN3/CTNNB1/DCX/EPB41/GABARAP/LSM14A/NEBL/PARD6G/PFN2/RAB11A/RAP2B/RDX/RFLNB/SDCBP/TMOD3/TMSB15B	22	BP
GO:0090307	mitotic spindle assembly	3/222	20/6899	0.0250134	0.0250134	0.755832	CHMP5/LSM14A/RAB11A	3	BP
GO:0002768	immune response-regulating cell surface receptor signaling pathway	5/222	52/6899	0.0251241	0.0251241	0.755832	APPL1/CD8A/CMKLR1/MS4A2/PLSCR1	5	BP
GO:0030029	actin filament-based process	14/222	246/6899	0.0270196	0.0270196	0.801244	AP1AR/ARHGDIB/ARPC5/CAPZA1/CNN3/EPB41/NEBL/PFN2/RAP2B/RDX/RFLNB/SDCBP/TMOD3/TMSB15B	14	BP
GO:1990778	protein localization to cell periphery	7/222	92/6899	0.0282314	0.0282314	0.807923	ADAM10/APPL1/LOC733637/PID1/RAB11A/SLC1A1/TMEM150A	7	BP
GO:0030834	regulation of actin filament depolymerization	3/222	21/6899	0.028506	0.028506	0.807923	CAPZA1/RDX/TMOD3	3	BP
GO:0070098	chemokine-mediated signaling pathway	3/222	21/6899	0.028506	0.028506	0.807923	CCL4/CCL8/CXCR4	3	BP
GO:0032970	regulation of actin filament-based process	8/222	113/6899	0.0288017	0.0288017	0.807923	AP1AR/ARHGDIB/ARPC5/CAPZA1/PFN2/RDX/TMOD3/TMSB15B	8	BP
GO:0071621	granulocyte chemotaxis	4/222	37/6899	0.0300369	0.0300369	0.831336	CCL4/CCL8/CMKLR1/S100A9	4	BP
GO:0030042	actin filament depolymerization	3/222	22/6899	0.0322434	0.0322434	0.843342	CAPZA1/RDX/TMOD3	3	BP
GO:0072384	organelle transport along microtubule	3/222	22/6899	0.0322434	0.0322434	0.843342	BLOC1S3/BLOC1S6/RAB1A	3	BP
GO:0031503	protein-containing complex localization	4/222	38/6899	0.0327515	0.0327515	0.843342	ADAM10/FCGR3A/RAB11A/SLC1A1	4	BP
GO:0007015	actin filament organization	9/222	138/6899	0.0335021	0.0335021	0.843342	AP1AR/ARPC5/CAPZA1/NEBL/PFN2/RDX/RFLNB/TMOD3/TMSB15B	9	BP
GO:0006875	cellular metal ion homeostasis	9/222	139/6899	0.0348598	0.0348598	0.843342	ATP6V1A/ATP6V1G1/CCL8/HEXB/SLC1A1/SLC30A9/SLC31A1/SLC40A1/TMCO1	9	BP
GO:1901699	cellular response to nitrogen compound	10/222	162/6899	0.0357675	0.0357675	0.843342	APPL1/CHMP5/CTNNB1/GNA11/P2RY12/PID1/PIP4K2A/RGS10/SLC1A1/STAT3	10	BP
GO:0048247	lymphocyte chemotaxis	3/222	23/6899	0.0362235	0.0362235	0.843342	ADAM10/CCL4/CCL8	3	BP
GO:0030218	erythrocyte differentiation	4/222	40/6899	0.0385984	0.0385984	0.843342	CASP3/SLC25A5/STAT3/TMOD3	4	BP
GO:1904019	epithelial cell apoptotic process	4/222	40/6899	0.0385984	0.0385984	0.843342	ANGPTL4/CASP9/PDCD4/SAV1	4	BP
GO:0010839	negative regulation of keratinocyte proliferation	2/222	10/6899	0.0391259	0.0391259	0.843342	KLF9/SNAI2	2	BP
GO:0097120	receptor localization to synapse	2/222	10/6899	0.0391259	0.0391259	0.843342	ADAM10/RAB11A	2	BP
GO:0043967	histone H4 acetylation	3/222	24/6899	0.0404439	0.0404439	0.843342	MORF4L1/MSL3/TAF7	3	BP
GO:1901880	negative regulation of protein depolymerization	3/222	24/6899	0.0404439	0.0404439	0.843342	CAPZA1/RDX/TMOD3	3	BP
GO:0032103	positive regulation of response to external stimulus	8/222	121/6899	0.0408258	0.0408258	0.843342	ADAM10/CD180/CMKLR1/GPSM3/LSM14A/LY96/PDCD4/PLSCR1	8	BP
GO:0034097	response to cytokine	14/222	261/6899	0.0415369	0.0415369	0.843342	ADAM10/APPL1/CCL4/CCL8/CXCR4/ENDOG/LOX/LSM14A/MSC/PID1/RAB7B/SLC1A1/SLC25A5/STAT3	14	BP
GO:0031333	negative regulation of protein-containing complex assembly	4/222	41/6899	0.0417315	0.0417315	0.843342	CAPZA1/RDX/TMOD3/TMSB15B	4	BP
GO:0071453	cellular response to oxygen levels	4/222	41/6899	0.0417315	0.0417315	0.843342	AQP3/ATP6V1A/ATP6V1G1/CHCHD2	4	BP
GO:0097530	granulocyte migration	4/222	41/6899	0.0417315	0.0417315	0.843342	CCL4/CCL8/CMKLR1/S100A9	4	BP
GO:0009719	response to endogenous stimulus	19/222	386/6899	0.0417433	0.0417433	0.843342	ABHD2/APPL1/BMP5/CASP9/CDKN2B/CHMP5/CTNNB1/HPGD/KLF9/LOX/P2RY12/PDCD4/PID1/PIP4K2A/SHISA2/SLC1A1/SNAI2/STAT3/TAF7	19	BP
GO:0043254	regulation of protein-containing complex assembly	8/222	122/6899	0.0425325	0.0425325	0.843342	ARPC5/BBS10/CAPZA1/MYD88/PFN2/RDX/TMOD3/TMSB15B	8	BP
GO:0071407	cellular response to organic cyclic compound	8/222	122/6899	0.0425325	0.0425325	0.843342	ABHD2/CASP9/CTNNB1/KLF9/P2RY12/SLC1A1/SNAI2/TAF7	8	BP
GO:0022604	regulation of cell morphogenesis	6/222	80/6899	0.0433426	0.0433426	0.843342	AP1AR/ENPP2/HEXB/LOC733637/MRLC2/RDX	6	BP
GO:0006766	vitamin metabolic process	3/222	25/6899	0.0449013	0.0449013	0.843342	CRABP1/SNAI2/VNN1	3	BP
GO:0007098	centrosome cycle	4/222	42/6899	0.0450044	0.0450044	0.843342	CHMP5/CHORDC1/CTNNB1/PARD6G	4	BP
GO:0032984	protein-containing complex disassembly	6/222	81/6899	0.0456072	0.0456072	0.843342	ATG12/CAPZA1/CHMP5/MTRF1/RDX/TMOD3	6	BP
GO:0097529	myeloid leukocyte migration	5/222	61/6899	0.0457074	0.0457074	0.843342	CCL4/CCL8/CMKLR1/P2RY12/S100A9	5	BP
GO:0006775	fat-soluble vitamin metabolic process	2/222	11/6899	0.0468252	0.0468252	0.843342	CRABP1/SNAI2	2	BP
GO:0006882	cellular zinc ion homeostasis	2/222	11/6899	0.0468252	0.0468252	0.843342	SLC1A1/SLC30A9	2	BP
GO:0010640	regulation of platelet-derived growth factor receptor signaling pathway	2/222	11/6899	0.0468252	0.0468252	0.843342	CBL/LOX	2	BP
GO:0043968	histone H2A acetylation	2/222	11/6899	0.0468252	0.0468252	0.843342	MORF4L1/MSL3	2	BP
GO:0055069	zinc ion homeostasis	2/222	11/6899	0.0468252	0.0468252	0.843342	SLC1A1/SLC30A9	2	BP
GO:0061037	negative regulation of cartilage development	2/222	11/6899	0.0468252	0.0468252	0.843342	RFLNB/SNAI2	2	BP
GO:0097242	amyloid-beta clearance	2/222	11/6899	0.0468252	0.0468252	0.843342	LOC100511343/RAB11A	2	BP
GO:1905517	macrophage migration	2/222	11/6899	0.0468252	0.0468252	0.843342	CMKLR1/P2RY12	2	BP
GO:0080135	regulation of cellular response to stress	11/222	194/6899	0.0480233	0.0480233	0.843342	CASP9/CHCHD2/DEK/ENDOG/MAGI3/MDFIC/MORF4L1/MTURN/PPP4R3B/RAP2B/SNAI2	11	BP
GO:0042592	homeostatic process	23/222	497/6899	0.0483652	0.0483652	0.843342	ABHD5/ANGPTL4/AQP3/ATP6V1A/ATP6V1G1/BBS10/C2CD2L/CASP3/CCL8/CMKLR1/FCGR3A/HEXB/LOX/MYLIP/PRDX6/SLC1A1/SLC25A5/SLC30A9/SLC31A1/SLC40A1/STAT3/TMCO1/TMOD3	23	BP
GO:0008643	carbohydrate transport	4/222	43/6899	0.0484171	0.0484171	0.843342	APPL1/AQP3/PID1/SLC5A1	4	BP
GO:0043244	regulation of protein-containing complex disassembly	4/222	43/6899	0.0484171	0.0484171	0.843342	ATG12/CAPZA1/RDX/TMOD3	4	BP
GO:0046328	regulation of JNK cascade	4/222	43/6899	0.0484171	0.0484171	0.843342	MAGI3/MDFIC/MTURN/RAP2B	4	BP
GO:0050776	regulation of immune response	13/222	243/6899	0.0493334	0.0493334	0.843342	APPL1/ATG12/C7/CD180/CD8A/CMKLR1/HCST/LSM14A/LY96/MS4A2/MYD88/PLSCR1/RAB7B	13	BP
GO:0006879	cellular iron ion homeostasis	3/222	26/6899	0.0495919	0.0495919	0.843342	ATP6V1A/ATP6V1G1/SLC40A1	3	BP
GO:0042326	negative regulation of phosphorylation	7/222	104/6899	0.0497819	0.0497819	0.843342	CBL/CDKN2B/HHEX/PID1/PIP4K2A/PRKAR2A/TAF7	7	BP
GO:0032432	actin filament bundle	4/229	13/7848	0.000410292	0.000410292	0.111427	LOC733637/MRLC2/NEBL/RFLNB	4	CC
GO:0001725	stress fiber	3/229	12/7848	0.00443824	0.00443824	0.280714	LOC733637/MRLC2/NEBL	3	CC
GO:0042641	actomyosin	3/229	12/7848	0.00443824	0.00443824	0.280714	LOC733637/MRLC2/NEBL	3	CC
GO:0097517	contractile actin filament bundle	3/229	12/7848	0.00443824	0.00443824	0.280714	LOC733637/MRLC2/NEBL	3	CC
GO:0097731	9+0 non-motile cilium	4/229	28/7848	0.00833729	0.00833729	0.280714	C10H1orf115/GNA11/PIP4K2A/TULP3	4	CC
GO:0005911	cell-cell junction	10/229	146/7848	0.0102173	0.0102173	0.280714	ADAM10/AQP3/CD53/CTNNB1/F11R/MAGI3/PARD6G/RAP2B/RDX/SLC31A1	10	CC
GO:0046930	pore complex	3/229	16/7848	0.0103657	0.0103657	0.280714	ADAM10/C7/SLC25A5	3	CC
GO:1990204	oxidoreductase complex	6/229	65/7848	0.0113739	0.0113739	0.280714	CYTB/IDH3A/NCF2/ND3/ND4/SDHC	6	CC
GO:0070469	respirasome	6/229	67/7848	0.0130994	0.0130994	0.280714	COX3/CYTB/ND3/ND4/ND4L/SDHC	6	CC
GO:0097730	non-motile cilium	4/229	32/7848	0.0133743	0.0133743	0.280714	C10H1orf115/GNA11/PIP4K2A/TULP3	4	CC
GO:0045121	membrane raft	7/229	88/7848	0.0140965	0.0140965	0.280714	CBL/CD8A/LOC100511343/OLR1/PLSCR1/RAP2B/SLC1A1	7	CC
GO:0098857	membrane microdomain	7/229	88/7848	0.0140965	0.0140965	0.280714	CBL/CD8A/LOC100511343/OLR1/PLSCR1/RAP2B/SLC1A1	7	CC
GO:0030133	transport vesicle	8/229	109/7848	0.0141207	0.0141207	0.280714	AP1AR/ATP6V1A/BLOC1S3/BLOC1S6/NTS/RAB11A/SEC24C/STX11	8	CC
GO:0032154	cleavage furrow	3/229	18/7848	0.0144709	0.0144709	0.280714	PPP1CC/RAB11A/RDX	3	CC
GO:0032838	plasma membrane bounded cell projection cytoplasm	5/229	51/7848	0.0159805	0.0159805	0.285512	BLOC1S3/BLOC1S6/DCX/GABARAP/TULP3	5	CC
GO:0055038	recycling endosome membrane	3/229	19/7848	0.0168209	0.0168209	0.285512	RAB11A/RAP2B/SLC1A1	3	CC
GO:0098590	plasma membrane region	16/229	310/7848	0.0189791	0.0189791	0.29766	ADAM10/AQP3/C2CD2L/CBL/CD8A/HPGD/LOC100511343/P2RY12/PARD6G/PPP1CC/RAB11A/RDX/SLC1A1/SLC40A1/SLC5A1/STX11	16	CC
GO:0099568	cytoplasmic region	5/229	54/7848	0.0200612	0.0200612	0.29766	BLOC1S3/BLOC1S6/DCX/GABARAP/TULP3	5	CC
GO:0045335	phagocytic vesicle	4/229	37/7848	0.0219452	0.0219452	0.29766	APPL1/RAB11A/RAB32/RAB7B	4	CC
GO:0032153	cell division site	3/229	21/7848	0.0221237	0.0221237	0.29766	PPP1CC/RAB11A/RDX	3	CC
GO:0000323	lytic vacuole	10/229	167/7848	0.0241128	0.0241128	0.29766	ATP6V1A/ATP6V1G1/CHMP5/CXCR4/GABARAP/GLA/HEXB/PIP4K2A/PRDX6/RAB7B	10	CC
GO:0005764	lysosome	10/229	167/7848	0.0241128	0.0241128	0.29766	ATP6V1A/ATP6V1G1/CHMP5/CXCR4/GABARAP/GLA/HEXB/PIP4K2A/PRDX6/RAB7B	10	CC
GO:0005746	mitochondrial respirasome	5/229	59/7848	0.0282749	0.0282749	0.333864	COX3/CYTB/ND3/ND4/SDHC	5	CC
GO:0045177	apical part of cell	7/229	104/7848	0.0320228	0.0320228	0.33507	C2CD2L/LOC100511343/MRLC2/PARD6G/RDX/SLC1A1/SLC5A1	7	CC
GO:0005773	vacuole	11/229	200/7848	0.0320634	0.0320634	0.33507	ATG12/ATP6V1A/ATP6V1G1/CHMP5/CXCR4/GABARAP/GLA/HEXB/PIP4K2A/PRDX6/RAB7B	11	CC
GO:0098803	respiratory chain complex	5/229	61/7848	0.0320784	0.0320784	0.33507	COX3/CYTB/ND3/ND4/SDHC	5	CC
GO:0016471	vacuolar proton-transporting V-type ATPase complex	2/229	11/7848	0.0391993	0.0391993	0.367093	ATP6V1A/ATP6V1G1	2	CC
GO:0031082	BLOC complex	2/229	11/7848	0.0391993	0.0391993	0.367093	BLOC1S3/BLOC1S6	2	CC
GO:0034045	phagophore assembly site membrane	2/229	11/7848	0.0391993	0.0391993	0.367093	ATG12/RAB1B	2	CC
GO:0005938	cell cortex	5/229	65/7848	0.0406066	0.0406066	0.367596	C2CD2L/CTNNB1/EPB41/MRLC2/PARD6G	5	CC
GO:0015629	actin cytoskeleton	8/229	135/7848	0.0435671	0.0435671	0.381674	ARPC5/CAPZA1/GABARAP/LOC733637/MRLC2/NEBL/RFLNB/TMOD3	8	CC
GO:0000421	autophagosome membrane	2/229	12/7848	0.0461515	0.0461515	0.39168	CHMP5/GABARAP	2	CC
GO:0098796	membrane protein complex	21/229	491/7848	0.0494288	0.0494288	0.396137	ADAM10/ATP6V1A/ATP6V1G1/BLOC1S6/C7/CBL/CD3D/CD3G/COX3/CTNNB1/CYTB/LY96/MS4A2/NCF2/ND3/ND4/SDHC/SEC24C/SLA-DRA/SLC25A5/STX11	21	CC
GO:0003925	G protein activity	5/228	13/7135	3.32794e-05	3.32794e-05	0.0121207	NRAS/RAB11A/RAB1A/RAB1B/RAP2B	5	MF
GO:0009055	electron transfer activity	6/228	29/7135	0.000255416	0.000255416	0.0465126	COX3/CYTB/ND3/ND4/ND4L/SDHC	6	MF
GO:0015453	oxidoreduction-driven active transmembrane transporter activity	5/228	21/7135	0.000426679	0.000426679	0.0518003	COX3/CYTB/ND3/ND4/ND4L	5	MF
GO:0016655	oxidoreductase activity, acting on NAD(P)H, quinone or similar compound as acceptor	4/228	16/7135	0.00136521	0.00136521	0.119994	ND3/ND4/ND4L/TP53I3	4	MF
GO:0008092	cytoskeletal protein binding	21/228	326/7135	0.00164731	0.00164731	0.119994	AP1AR/APPL1/ARPC5/BLOC1S6/CAPZA1/CNN3/CXCR4/DCX/EPB41/GABARAP/JAKMIP1/MRLC2/MYLIP/NEBL/PFN2/RAB11A/RCSD1/RDX/RFLNB/TMOD3/TMSB15B	21	MF
GO:0015399	primary active transmembrane transporter activity	7/228	62/7135	0.00342012	0.00342012	0.182801	ATP6V1A/ATP6V1G1/COX3/CYTB/ND3/ND4/ND4L	7	MF
GO:0022804	active transmembrane transporter activity	12/228	153/7135	0.00351337	0.00351337	0.182801	ATP6V1A/ATP6V1G1/COX3/CYTB/ND3/ND4/ND4L/SLC1A1/SLC25A5/SLC5A1/SLC6A6/SLCO2A1	12	MF
GO:0022853	active ion transmembrane transporter activity	9/228	103/7135	0.00548808	0.00548808	0.189425	ATP6V1A/ATP6V1G1/COX3/CYTB/SLC1A1/SLC25A5/SLC5A1/SLC6A6/SLCO2A1	9	MF
GO:0003954	NADH dehydrogenase activity	3/228	12/7135	0.00572106	0.00572106	0.189425	ND3/ND4/ND4L	3	MF
GO:0008137	NADH dehydrogenase (ubiquinone) activity	3/228	12/7135	0.00572106	0.00572106	0.189425	ND3/ND4/ND4L	3	MF
GO:0050136	NADH dehydrogenase (quinone) activity	3/228	12/7135	0.00572106	0.00572106	0.189425	ND3/ND4/ND4L	3	MF
GO:0017124	SH3 domain binding	4/228	25/7135	0.00757469	0.00757469	0.229899	ADAM10/CASP9/CBL/PLSCR1	4	MF
GO:0016651	oxidoreductase activity, acting on NAD(P)H	4/228	26/7135	0.00873179	0.00873179	0.234904	ND3/ND4/ND4L/TP53I3	4	MF
GO:0003955	NAD(P)H dehydrogenase (quinone) activity	3/228	14/7135	0.00902954	0.00902954	0.234904	ND3/ND4/ND4L	3	MF
GO:0003779	actin binding	11/228	156/7135	0.0111152	0.0111152	0.269884	ARPC5/BLOC1S6/CAPZA1/CNN3/CXCR4/EPB41/NEBL/PFN2/RCSD1/RDX/TMSB15B	11	MF
GO:0038024	cargo receptor activity	4/228	30/7135	0.0144933	0.0144933	0.329912	ENPP2/LOC100511343/MSR1/OLR1	4	MF
GO:0005548	phospholipid transporter activity	3/228	19/7135	0.0213776	0.0213776	0.403948	C2CD2L/PLSCR1/PRELID3B	3	MF
GO:0042562	hormone binding	4/228	34/7135	0.022218	0.022218	0.403948	ABHD2/C2CD2L/CMKLR1/SLC40A1	4	MF
GO:0003924	GTPase activity	10/228	152/7135	0.023454	0.023454	0.403948	ARHGDIB/ARL13B/GNA11/NRAS/RAB11A/RAB1A/RAB1B/RAB32/RAB7B/RAP2B	10	MF
GO:0005044	scavenger receptor activity	3/228	20/7135	0.0245701	0.0245701	0.403948	ENPP2/LOC100511343/MSR1	3	MF
GO:0001227	DNA-binding transcription repressor activity, RNA polymerase II-specific	6/228	75/7135	0.0321625	0.0321625	0.403948	HHEX/MSC/SNAI2/THAP11/ZBED2/ZBTB33	6	MF
GO:0140375	immune receptor activity	5/228	56/7135	0.0325054	0.0325054	0.403948	CMKLR1/CXCR4/FCGR3A/IL2RG/IL7R	5	MF
GO:0017046	peptide hormone binding	3/228	23/7135	0.0355978	0.0355978	0.403948	C2CD2L/CMKLR1/SLC40A1	3	MF
GO:0001217	DNA-binding transcription repressor activity	6/228	77/7135	0.0359541	0.0359541	0.403948	HHEX/MSC/SNAI2/THAP11/ZBED2/ZBTB33	6	MF
GO:0016491	oxidoreductase activity	19/228	382/7135	0.0360861	0.0360861	0.403948	AKR7A2/CAT/CMAH/COX3/CYTB/FAXDC2/FTO/GPX1/HPGD/IDH3A/KIAA1191/LOX/ND3/ND4/ND4L/PRDX6/SDHC/TET1/TP53I3	19	MF
GO:0016462	pyrophosphatase activity	14/228	258/7135	0.0364986	0.0364986	0.403948	ARHGDIB/ARL13B/ATP6V1G1/ENPP2/GNA11/HSPA6/NRAS/NUDT4/RAB11A/RAB1A/RAB1B/RAB32/RAB7B/RAP2B	14	MF
GO:0015078	proton transmembrane transporter activity	5/228	58/7135	0.0370646	0.0370646	0.403948	ATP6V1A/ATP6V1G1/COX3/CYTB/SLC25A5	5	MF
GO:0004953	icosanoid receptor activity	2/228	10/7135	0.0386331	0.0386331	0.403948	HPGD/LTB4R2	2	MF
GO:0005372	water transmembrane transporter activity	2/228	10/7135	0.0386331	0.0386331	0.403948	AQP3/SLC5A1	2	MF
GO:0005523	tropomyosin binding	2/228	10/7135	0.0386331	0.0386331	0.403948	NEBL/TMOD3	2	MF
GO:0016818	hydrolase activity, acting on acid anhydrides, in phosphorus-containing anhydrides	14/228	261/7135	0.0396383	0.0396383	0.403948	ARHGDIB/ARL13B/ATP6V1G1/ENPP2/GNA11/HSPA6/NRAS/NUDT4/RAB11A/RAB1A/RAB1B/RAB32/RAB7B/RAP2B	14	MF
GO:0016817	hydrolase activity, acting on acid anhydrides	14/228	262/7135	0.0407265	0.0407265	0.403948	ARHGDIB/ARL13B/ATP6V1G1/ENPP2/GNA11/HSPA6/NRAS/NUDT4/RAB11A/RAB1A/RAB1B/RAB32/RAB7B/RAP2B	14	MF
GO:0051015	actin filament binding	5/228	60/7135	0.041998	0.041998	0.403948	ARPC5/BLOC1S6/CAPZA1/NEBL/RCSD1	5	MF
GO:0004601	peroxidase activity	3/228	25/7135	0.044139	0.044139	0.403948	CAT/GPX1/PRDX6	3	MF
GO:0017022	myosin binding	3/228	25/7135	0.044139	0.044139	0.403948	CXCR4/MRLC2/RAB11A	3	MF
GO:0008289	lipid binding	14/228	266/7135	0.045293	0.045293	0.403948	ANXA4/APPL1/C2CD2L/CPNE8/CRABP1/FABP2/FABP5/LY96/PLEKHA3/SCP2/SNX27/STARD4/STARD7/TULP3	14	MF
GO:0001614	purinergic nucleotide receptor activity	2/228	11/7135	0.0462419	0.0462419	0.403948	GPR34/P2RY12	2	MF
GO:0004602	glutathione peroxidase activity	2/228	11/7135	0.0462419	0.0462419	0.403948	GPX1/PRDX6	2	MF
GO:0016502	nucleotide receptor activity	2/228	11/7135	0.0462419	0.0462419	0.403948	GPR34/P2RY12	2	MF
GO:0030234	enzyme regulator activity	19/228	396/7135	0.0489589	0.0489589	0.403948	ANGPTL4/ARHGDIB/CCL8/CCNG1/CDKN2B/CYTH4/DAZAP2/GPSM3/LOC100156248/NCF2/NET1/PKIB/PPP4R3B/PRKAR2A/RGS10/RGS18/RP2/SERPINB9/STYX	19	MF

## Sheet: Down-regulated genes enriched
ID	Description	GeneRatio	BgRatio	pvalue	p.adjust	qvalue	geneID	Count	Ont
GO:1903900	regulation of viral life cycle	6/184	39/6899	0.00052008	0.00052008	0.331587	IFITM3/ISG15/MX1/TMEM39A/TMPRSS4/TRIM59	6	BP
GO:0034340	response to type I interferon	4/184	17/6899	0.000887639	0.000887639	0.331587	IFITM3/IRF7/ISG15/MX1	4	BP
GO:0071357	cellular response to type I interferon	4/184	17/6899	0.000887639	0.000887639	0.331587	IFITM3/IRF7/ISG15/MX1	4	BP
GO:0006956	complement activation	5/184	30/6899	0.00105891	0.00105891	0.331587	C2/C6/C9/CFB/CFP	5	BP
GO:0051224	negative regulation of protein transport	5/184	32/6899	0.00143318	0.00143318	0.331587	APOD/CHGA/DERL3/GHRL/RSAD2	5	BP
GO:0050792	regulation of viral process	6/184	48/6899	0.00160393	0.00160393	0.331587	IFITM3/ISG15/MX1/TMEM39A/TMPRSS4/TRIM59	6	BP
GO:0007189	adenylate cyclase-activating G protein-coupled receptor signaling pathway	7/184	65/6899	0.00161457	0.00161457	0.331587	ADM5/CALCB/CALCB/CHGA/CXCL11/GPER1/VIP	7	BP
GO:0051924	regulation of calcium ion transport	7/184	65/6899	0.00161457	0.00161457	0.331587	ATP2C2/CASQ1/CXCL11/GPER1/HRC/PLPP4/SPINK1	7	BP
GO:1904950	negative regulation of establishment of protein localization	5/184	33/6899	0.0016531	0.0016531	0.331587	APOD/CHGA/DERL3/GHRL/RSAD2	5	BP
GO:0046596	regulation of viral entry into host cell	3/184	10/6899	0.00195046	0.00195046	0.352109	IFITM3/TMPRSS4/TRIM59	3	BP
GO:0006957	complement activation, alternative pathway	3/184	11/6899	0.00262955	0.00262955	0.361552	C9/CFB/CFP	3	BP
GO:0052372	modulation by symbiont of entry into host	3/184	11/6899	0.00262955	0.00262955	0.361552	IFITM3/TMPRSS4/TRIM59	3	BP
GO:0007188	adenylate cyclase-modulating G protein-coupled receptor signaling pathway	8/184	91/6899	0.00282714	0.00282714	0.361552	ADM5/CALCB/CALCB/CHGA/CHRM1/CXCL11/GPER1/VIP	8	BP
GO:0060284	regulation of cell development	10/184	136/6899	0.00331383	0.00331383	0.361552	BMP7/CALR/CCNB2/CLDN5/DNAJB11/EPHA7/GPER1/ISLR2/NKX2-2/NTN1	10	BP
GO:0051279	regulation of release of sequestered calcium ion into cytosol	4/184	24/6899	0.00342531	0.00342531	0.361552	CASQ1/CXCL11/GPER1/HRC	4	BP
GO:0090279	regulation of calcium ion import	3/184	12/6899	0.00343773	0.00343773	0.361552	ATP2C2/PLPP4/SPINK1	3	BP
GO:0051960	regulation of nervous system development	9/184	116/6899	0.00368155	0.00368155	0.361552	BMP7/DNAJB11/EPHA7/GHRL/GPER1/ISLR2/NKX2-2/NTN1/PTPRZ1	9	BP
GO:0045069	regulation of viral genome replication	4/184	25/6899	0.00399397	0.00399397	0.361552	IFITM3/ISG15/MX1/TMEM39A	4	BP
GO:0048525	negative regulation of viral process	4/184	25/6899	0.00399397	0.00399397	0.361552	IFITM3/ISG15/MX1/TRIM59	4	BP
GO:0045071	negative regulation of viral genome replication	3/184	13/6899	0.00438207	0.00438207	0.361552	IFITM3/ISG15/MX1	3	BP
GO:0060337	type I interferon signaling pathway	3/184	13/6899	0.00438207	0.00438207	0.361552	IFITM3/IRF7/ISG15	3	BP
GO:0045087	innate immune response	14/184	238/6899	0.00440609	0.00440609	0.361552	C2/C6/C9/CFB/CFP/DHX58/HMGB3/IFITM3/IRF7/ISG15/MX1/OASL/RSAD2/TRIM59	14	BP
GO:0007267	cell-cell signaling	21/184	427/6899	0.00461532	0.00461532	0.362255	CDC20/CHGA/CHRDL1/CHRM1/CHRM2/DKK3/GAL/GHRL/GIP/GJA5/GJB1/GPER1/LZTS1/NLE1/RAB26/SFRP4/SOSTDC1/SYP/SYT13/TAC1/VIP	21	BP
GO:0097553	calcium ion transmembrane import into cytosol	5/184	42/6899	0.00488363	0.00488363	0.365009	CACNA1D/CASQ1/CXCL11/GPER1/HRC	5	BP
GO:0010959	regulation of metal ion transport	8/184	100/6899	0.00505479	0.00505479	0.365009	ATP2C2/CASQ1/CNTN1/CXCL11/GPER1/HRC/PLPP4/SPINK1	8	BP
GO:0051928	positive regulation of calcium ion transport	4/184	27/6899	0.00531599	0.00531599	0.36565	ATP2C2/CASQ1/CXCL11/GPER1	4	BP
GO:0090075	relaxation of muscle	3/184	14/6899	0.00546876	0.00546876	0.36565	CHGA/HRC/KCNMA1	3	BP
GO:0043269	regulation of ion transport	11/184	171/6899	0.00584836	0.00584836	0.377065	ATP2C2/CACNA1D/CASQ1/CNTN1/CXCL11/GPER1/HRC/KCNMA1/PLPP4/SPINK1/SYT13	11	BP
GO:0006816	calcium ion transport	8/184	104/6899	0.00639516	0.00639516	0.380111	ATP2C2/CACNA1D/CASQ1/CXCL11/GPER1/HRC/PLPP4/SPINK1	8	BP
GO:0043903	regulation of biological process involved in symbiotic interaction	3/184	15/6899	0.00670325	0.00670325	0.380111	IFITM3/TMPRSS4/TRIM59	3	BP
GO:0070509	calcium ion import	3/184	15/6899	0.00670325	0.00670325	0.380111	ATP2C2/PLPP4/SPINK1	3	BP
GO:0019058	viral life cycle	6/184	64/6899	0.00689948	0.00689948	0.380111	IFITM3/ISG15/MX1/TMEM39A/TMPRSS4/TRIM59	6	BP
GO:0000280	nuclear division	9/184	128/6899	0.00701212	0.00701212	0.380111	BMP7/CALR/CCNB2/FIGNL1/GEN1/NUF2/RMI1/WRAP73/ZWINT	9	BP
GO:0002443	leukocyte mediated immunity	8/184	106/6899	0.00715894	0.00715894	0.380111	C2/C6/C9/CHGA/IRF7/NTN1/PTGDS/RSAD2	8	BP
GO:0018210	peptidyl-threonine modification	4/184	30/6899	0.00780166	0.00780166	0.393575	BMP7/CAMK2A/CLK1/GALNT16	4	BP
GO:1903046	meiotic cell cycle process	6/184	66/6899	0.008004	0.008004	0.393575	CALR/CCNB2/CDC20/FIGNL1/NUF2/RMI1	6	BP
GO:0051281	positive regulation of release of sequestered calcium ion into cytosol	3/184	16/6899	0.0080902	0.0080902	0.393575	CASQ1/CXCL11/GPER1	3	BP
GO:1903828	negative regulation of protein localization	5/184	48/6899	0.008647	0.008647	0.393575	APOD/CHGA/DERL3/GHRL/RSAD2	5	BP
GO:0030858	positive regulation of epithelial cell differentiation	3/184	17/6899	0.0096336	0.0096336	0.393575	BMP7/ETV4/NKX2-2	3	BP
GO:0032728	positive regulation of interferon-beta production	3/184	17/6899	0.0096336	0.0096336	0.393575	DHX58/IRF7/ISG15	3	BP
GO:0050767	regulation of neurogenesis	7/184	90/6899	0.00993615	0.00993615	0.393575	BMP7/DNAJB11/EPHA7/GPER1/ISLR2/NKX2-2/NTN1	7	BP
GO:0030001	metal ion transport	13/184	236/6899	0.0102012	0.0102012	0.393575	ATP1A2/ATP2C2/CACNA1D/CASQ1/CNTN1/CXCL11/GPER1/HRC/KCNK1/KCNN3/PLPP4/SLC5A8/SPINK1	13	BP
GO:0019724	B cell mediated immunity	5/184	50/6899	0.010253	0.010253	0.393575	C2/C6/C9/IRF7/NTN1	5	BP
GO:0043270	positive regulation of ion transport	5/184	50/6899	0.010253	0.010253	0.393575	ATP2C2/CASQ1/CNTN1/CXCL11/GPER1	5	BP
GO:0051223	regulation of protein transport	8/184	114/6899	0.0109195	0.0109195	0.393575	APOD/CHGA/DERL3/GHRL/GIP/GPER1/MYOM1/RSAD2	8	BP
GO:0019079	viral genome replication	4/184	33/6899	0.0109501	0.0109501	0.393575	IFITM3/ISG15/MX1/TMEM39A	4	BP
GO:0051209	release of sequestered calcium ion into cytosol	4/184	33/6899	0.0109501	0.0109501	0.393575	CASQ1/CXCL11/GPER1/HRC	4	BP
GO:0051282	regulation of sequestering of calcium ion	4/184	33/6899	0.0109501	0.0109501	0.393575	CASQ1/CXCL11/GPER1/HRC	4	BP
GO:0051283	negative regulation of sequestering of calcium ion	4/184	33/6899	0.0109501	0.0109501	0.393575	CASQ1/CXCL11/GPER1/HRC	4	BP
GO:0140013	meiotic nuclear division	5/184	51/6899	0.0111279	0.0111279	0.393575	CALR/CCNB2/FIGNL1/NUF2/RMI1	5	BP
GO:0006958	complement activation, classical pathway	3/184	18/6899	0.0113368	0.0113368	0.393575	C2/C6/C9	3	BP
GO:0051480	regulation of cytosolic calcium ion concentration	3/184	18/6899	0.0113368	0.0113368	0.393575	CALCB/CALCB/HRC	3	BP
GO:0030072	peptide hormone secretion	6/184	72/6899	0.012077	0.012077	0.40308	CHGA/GAL/GHRL/GIP/GPER1/VIP	6	BP
GO:0051208	sequestering of calcium ion	4/184	34/6899	0.0121572	0.0121572	0.40308	CASQ1/CXCL11/GPER1/HRC	4	BP
GO:0048285	organelle fission	9/184	140/6899	0.0122804	0.0122804	0.40308	BMP7/CALR/CCNB2/FIGNL1/GEN1/NUF2/RMI1/WRAP73/ZWINT	9	BP
GO:0002790	peptide secretion	6/184	73/6899	0.0128754	0.0128754	0.407781	CHGA/GAL/GHRL/GIP/GPER1/VIP	6	BP
GO:0050708	regulation of protein secretion	6/184	73/6899	0.0128754	0.0128754	0.407781	CHGA/GHRL/GIP/GPER1/MYOM1/RSAD2	6	BP
GO:0045214	sarcomere organization	3/184	19/6899	0.0132025	0.0132025	0.41093	CASQ1/FLNC/KRT19	3	BP
GO:0051049	regulation of transport	21/184	471/6899	0.0135432	0.0135432	0.413357	APOD/ATP2C2/CACNA1D/CALR/CASQ1/CHGA/CNTN1/CXCL11/DERL3/GAL/GHRL/GIP/GPER1/HRC/KCNMA1/MYOM1/PLPP4/RSAD2/SPINK1/SYNGR3/SYT13	21	BP
GO:0006812	cation transport	15/184	301/6899	0.014263	0.014263	0.413357	ATP1A2/ATP2C2/CACNA1D/CASQ1/CNTN1/CXCL11/GPER1/HRC/KCNK1/KCNN3/PLPP4/RHBG/SLC5A8/SPINK1/SYT13	15	BP
GO:0051321	meiotic cell cycle	6/184	75/6899	0.0145822	0.0145822	0.413357	CALR/CCNB2/CDC20/FIGNL1/NUF2/RMI1	6	BP
GO:0045839	negative regulation of mitotic nuclear division	3/184	20/6899	0.0152328	0.0152328	0.413357	BMP7/GEN1/ZWINT	3	BP
GO:0046718	viral entry into host cell	3/184	20/6899	0.0152328	0.0152328	0.413357	IFITM3/TMPRSS4/TRIM59	3	BP
GO:0070201	regulation of establishment of protein localization	8/184	121/6899	0.0152661	0.0152661	0.413357	APOD/CHGA/DERL3/GHRL/GIP/GPER1/MYOM1/RSAD2	8	BP
GO:0098542	defense response to other organism	17/184	360/6899	0.0153139	0.0153139	0.413357	BST2/C2/C6/C9/CFB/CFP/CHGA/CXCL11/DHX58/HMGB3/IFITM3/IRF7/ISG15/MX1/OASL/RSAD2/TRIM59	17	BP
GO:0010720	positive regulation of cell development	6/184	76/6899	0.015492	0.015492	0.413357	CALR/CLDN5/GPER1/ISLR2/NKX2-2/NTN1	6	BP
GO:0002252	immune effector process	11/184	197/6899	0.0159903	0.0159903	0.413357	C2/C6/C9/CFB/CFP/CHGA/DHX58/IRF7/NTN1/PTGDS/RSAD2	11	BP
GO:0072503	cellular divalent inorganic cation homeostasis	7/184	99/6899	0.0162283	0.0162283	0.413357	CALCB/CALCB/CASQ1/CXCL11/GPER1/HRC/MT1A	7	BP
GO:0010648	negative regulation of cell communication	18/184	394/6899	0.0173556	0.0173556	0.413357	APOD/ASPN/BMP7/CALR/CHGA/CHRDL1/DHX58/DKK3/FIGNL1/GAL/GHRL/GPER1/ISG15/NLE1/SOSTDC1/SPINK1/SPRY4/TRIM59	18	BP
GO:0032608	interferon-beta production	3/184	21/6899	0.0174294	0.0174294	0.413357	DHX58/IRF7/ISG15	3	BP
GO:0032648	regulation of interferon-beta production	3/184	21/6899	0.0174294	0.0174294	0.413357	DHX58/IRF7/ISG15	3	BP
GO:0044409	entry into host	3/184	21/6899	0.0174294	0.0174294	0.413357	IFITM3/TMPRSS4/TRIM59	3	BP
GO:1904427	positive regulation of calcium ion transmembrane transport	3/184	21/6899	0.0174294	0.0174294	0.413357	CASQ1/CXCL11/GPER1	3	BP
GO:0016358	dendrite development	5/184	57/6899	0.0174613	0.0174613	0.413357	BMP7/CAMK2A/GHRL/LZTS1/NTN1	5	BP
GO:0051607	defense response to virus	8/184	124/6899	0.0174694	0.0174694	0.413357	BST2/DHX58/IFITM3/IRF7/ISG15/MX1/OASL/RSAD2	8	BP
GO:0140546	defense response to symbiont	8/184	124/6899	0.0174694	0.0174694	0.413357	BST2/DHX58/IFITM3/IRF7/ISG15/MX1/OASL/RSAD2	8	BP
GO:0009306	protein secretion	7/184	101/6899	0.0179408	0.0179408	0.413357	CHGA/GHRL/GIP/GPER1/MYOM1/RSAD2/VIP	7	BP
GO:0023057	negative regulation of signaling	18/184	396/6899	0.0181821	0.0181821	0.413357	APOD/ASPN/BMP7/CALR/CHGA/CHRDL1/DHX58/DKK3/FIGNL1/GAL/GHRL/GPER1/ISG15/NLE1/SOSTDC1/SPINK1/SPRY4/TRIM59	18	BP
GO:0090276	regulation of peptide hormone secretion	5/184	58/6899	0.0187079	0.0187079	0.413357	CHGA/GAL/GHRL/GIP/GPER1	5	BP
GO:0035592	establishment of protein localization to extracellular region	7/184	102/6899	0.0188431	0.0188431	0.413357	CHGA/GHRL/GIP/GPER1/MYOM1/RSAD2/VIP	7	BP
GO:0022402	cell cycle process	16/184	340/6899	0.0189695	0.0189695	0.413357	BMP7/CALR/CCNB2/CDC20/CEP152/FIGNL1/GEN1/GPER1/IQGAP3/KIF20A/LZTS1/MCM3/NUF2/RMI1/WRAP73/ZWINT	16	BP
GO:0007186	G protein-coupled receptor signaling pathway	14/184	284/6899	0.0192121	0.0192121	0.413357	ADM5/CALCB/CALCB/CAMK2A/CHGA/CHRM1/CHRM2/CXCL11/GAL/GAST/GPER1/SCG5/TAC1/VIP	14	BP
GO:0071692	protein localization to extracellular region	7/184	103/6899	0.0197768	0.0197768	0.413357	CHGA/GHRL/GIP/GPER1/MYOM1/RSAD2/VIP	7	BP
GO:0002455	humoral immune response mediated by circulating immunoglobulin	3/184	22/6899	0.0197932	0.0197932	0.413357	C2/C6/C9	3	BP
GO:0050709	negative regulation of protein secretion	3/184	22/6899	0.0197932	0.0197932	0.413357	CHGA/GHRL/RSAD2	3	BP
GO:0002791	regulation of peptide secretion	5/184	59/6899	0.0200119	0.0200119	0.413357	CHGA/GAL/GHRL/GIP/GPER1	5	BP
GO:0090087	regulation of peptide transport	5/184	59/6899	0.0200119	0.0200119	0.413357	CHGA/GAL/GHRL/GIP/GPER1	5	BP
GO:0140352	export from cell	13/184	258/6899	0.0201497	0.0201497	0.413357	ATP1A2/CHGA/GAL/GHRL/GIP/GPER1/MYOM1/PTGDS/RAB26/RSAD2/SYNGR3/SYT13/VIP	13	BP
GO:0015833	peptide transport	6/184	81/6899	0.0206358	0.0206358	0.416063	CHGA/GAL/GHRL/GIP/GPER1/VIP	6	BP
GO:0072507	divalent inorganic cation homeostasis	7/184	104/6899	0.0207425	0.0207425	0.416063	CALCB/CALCB/CASQ1/CXCL11/GPER1/HRC/MT1A	7	BP
GO:0090257	regulation of muscle system process	5/184	60/6899	0.021374	0.021374	0.418436	CASQ1/GJA5/GPER1/HRC/KCNMA1	5	BP
GO:0002449	lymphocyte mediated immunity	6/184	82/6899	0.0217883	0.0217883	0.418436	C2/C6/C9/IRF7/NTN1/RSAD2	6	BP
GO:0032481	positive regulation of type I interferon production	3/184	23/6899	0.0223251	0.0223251	0.418436	DHX58/IRF7/ISG15	3	BP
GO:0090277	positive regulation of peptide hormone secretion	3/184	23/6899	0.0223251	0.0223251	0.418436	GAL/GHRL/GPER1	3	BP
GO:0045055	regulated exocytosis	5/184	61/6899	0.0227953	0.0227953	0.418436	CHGA/PTGDS/RAB26/SYNGR3/SYT13	5	BP
GO:1903169	regulation of calcium ion transmembrane transport	4/184	41/6899	0.0229965	0.0229965	0.418436	CASQ1/CXCL11/GPER1/HRC	4	BP
GO:0050804	modulation of chemical synaptic transmission	6/184	84/6899	0.0242224	0.0242224	0.418436	CDC20/CHRDL1/GPER1/LZTS1/RAB26/SYP	6	BP
GO:0099177	regulation of trans-synaptic signaling	6/184	84/6899	0.0242224	0.0242224	0.418436	CDC20/CHRDL1/GPER1/LZTS1/RAB26/SYP	6	BP
GO:0032940	secretion by cell	12/184	238/6899	0.0250003	0.0250003	0.418436	CHGA/GAL/GHRL/GIP/GPER1/MYOM1/PTGDS/RAB26/RSAD2/SYNGR3/SYT13/VIP	12	BP
GO:0002792	negative regulation of peptide secretion	3/184	24/6899	0.025025	0.025025	0.418436	CHGA/GAL/GHRL	3	BP
GO:0002793	positive regulation of peptide secretion	3/184	24/6899	0.025025	0.025025	0.418436	GAL/GHRL/GPER1	3	BP
GO:0090278	negative regulation of peptide hormone secretion	3/184	24/6899	0.025025	0.025025	0.418436	CHGA/GAL/GHRL	3	BP
GO:0030003	cellular cation homeostasis	9/184	158/6899	0.0250734	0.0250734	0.418436	ATP1A2/CALCB/CALCB/CASQ1/CXCL11/GPER1/HRC/MT1A/RAB38	9	BP
GO:0016032	viral process	6/184	86/6899	0.0268324	0.0268324	0.418436	IFITM3/ISG15/MX1/TMEM39A/TMPRSS4/TRIM59	6	BP
GO:0030282	bone mineralization	4/184	43/6899	0.0269025	0.0269025	0.418436	ASPN/BMP7/CLEC3B/ISG15	4	BP
GO:0046903	secretion	13/184	269/6899	0.0272699	0.0272699	0.418436	CHGA/CHRM1/GAL/GHRL/GIP/GPER1/MYOM1/PTGDS/RAB26/RSAD2/SYNGR3/SYT13/VIP	13	BP
GO:0006270	DNA replication initiation	2/184	10/6899	0.027655	0.027655	0.418436	MCM2/MCM3	2	BP
GO:0032508	DNA duplex unwinding	2/184	10/6899	0.027655	0.027655	0.418436	MCM2/MCM3	2	BP
GO:0060338	regulation of type I interferon-mediated signaling pathway	2/184	10/6899	0.027655	0.027655	0.418436	IRF7/ISG15	2	BP
GO:0070296	sarcoplasmic reticulum calcium ion transport	2/184	10/6899	0.027655	0.027655	0.418436	CASQ1/HRC	2	BP
GO:0045665	negative regulation of neuron differentiation	3/184	25/6899	0.0278929	0.0278929	0.418436	BMP7/CALR/NKX2-2	3	BP
GO:0061387	regulation of extent of cell growth	3/184	25/6899	0.0278929	0.0278929	0.418436	EPHA7/ISLR2/NTN1	3	BP
GO:0009719	response to endogenous stimulus	17/184	386/6899	0.0280929	0.0280929	0.418436	ASPN/BMP7/CALR/CAMK2A/CHRDL1/CLDN5/CLEC3B/EPM2AIP1/FIBIN/GHRL/GJA5/GPER1/KRT19/OGT/SLC2A4/SOSTDC1/TAC1	17	BP
GO:0002460	adaptive immune response based on somatic recombination of immune receptors built from immunoglobulin superfamily domains	6/184	87/6899	0.0282048	0.0282048	0.418436	C2/C6/C9/IRF7/NTN1/RSAD2	6	BP
GO:0006874	cellular calcium ion homeostasis	6/184	87/6899	0.0282048	0.0282048	0.418436	CALCB/CALCB/CASQ1/CXCL11/GPER1/HRC	6	BP
GO:0006873	cellular ion homeostasis	9/184	162/6899	0.0288729	0.0288729	0.418436	ATP1A2/CALCB/CALCB/CASQ1/CXCL11/GPER1/HRC/MT1A/RAB38	9	BP
GO:0050796	regulation of insulin secretion	4/184	44/6899	0.0289954	0.0289954	0.418436	CHGA/GHRL/GIP/GPER1	4	BP
GO:1903531	negative regulation of secretion by cell	4/184	44/6899	0.0289954	0.0289954	0.418436	CHGA/GAL/GHRL/RSAD2	4	BP
GO:0070588	calcium ion transmembrane transport	5/184	65/6899	0.029087	0.029087	0.418436	CACNA1D/CASQ1/CXCL11/GPER1/HRC	5	BP
GO:0051241	negative regulation of multicellular organismal process	13/184	272/6899	0.029499	0.029499	0.418436	ANGPTL7/APOD/ASPN/BMP7/CALR/CLDN5/DHX58/DNAJB11/EPHA7/GHRL/KCNMA1/THBD/THBS2	13	BP
GO:0055080	cation homeostasis	10/184	190/6899	0.0303181	0.0303181	0.418436	ATP1A2/CALCB/CALCB/CASQ1/CXCL11/GPER1/HRC/MT1A/RAB38/RHBG	10	BP
GO:0006096	glycolytic process	3/184	26/6899	0.0309281	0.0309281	0.418436	ALDOC/ENO2/OGT	3	BP
GO:0006757	ATP generation from ADP	3/184	26/6899	0.0309281	0.0309281	0.418436	ALDOC/ENO2/OGT	3	BP
GO:0018107	peptidyl-threonine phosphorylation	3/184	26/6899	0.0309281	0.0309281	0.418436	BMP7/CAMK2A/CLK1	3	BP
GO:0051784	negative regulation of nuclear division	3/184	26/6899	0.0309281	0.0309281	0.418436	BMP7/GEN1/ZWINT	3	BP
GO:0051051	negative regulation of transport	7/184	113/6899	0.0309486	0.0309486	0.418436	APOD/CHGA/DERL3/GAL/GHRL/RSAD2/SPINK1	7	BP
GO:0042886	amide transport	6/184	89/6899	0.031087	0.031087	0.418436	CHGA/GAL/GHRL/GIP/GPER1/VIP	6	BP
GO:0006261	DNA-templated DNA replication	4/184	45/6899	0.0311825	0.0311825	0.418436	GEN1/MCM2/MCM3/POLE2	4	BP
GO:0048167	regulation of synaptic plasticity	4/184	45/6899	0.0311825	0.0311825	0.418436	CDC20/CHRDL1/LZTS1/SYP	4	BP
GO:0006875	cellular metal ion homeostasis	8/184	139/6899	0.0319982	0.0319982	0.418436	ATP1A2/CALCB/CALCB/CASQ1/CXCL11/GPER1/HRC/MT1A	8	BP
GO:0009615	response to virus	8/184	139/6899	0.0319982	0.0319982	0.418436	BST2/DHX58/IFITM3/IRF7/ISG15/MX1/OASL/RSAD2	8	BP
GO:0055074	calcium ion homeostasis	6/184	90/6899	0.0325978	0.0325978	0.418436	CALCB/CALCB/CASQ1/CXCL11/GPER1/HRC	6	BP
GO:0099536	synaptic signaling	9/184	166/6899	0.0330607	0.0330607	0.418436	CDC20/CHRDL1/CHRM1/CHRM2/GPER1/LZTS1/RAB26/SYP/TAC1	9	BP
GO:0010460	positive regulation of heart rate	2/184	11/6899	0.0332163	0.0332163	0.418436	ADM5/HRC	2	BP
GO:0044000	movement in host	3/184	27/6899	0.0341296	0.0341296	0.418436	IFITM3/TMPRSS4/TRIM59	3	BP
GO:0098771	inorganic ion homeostasis	10/184	194/6899	0.0342891	0.0342891	0.418436	ATP1A2/CALCB/CALCB/CASQ1/CXCL11/GPER1/HRC/MT1A/RAB38/RHBG	10	BP
GO:0003015	heart process	5/184	68/6899	0.0344617	0.0344617	0.418436	ADM5/CHGA/CHRM2/GJA5/HRC	5	BP
GO:0009725	response to hormone	10/184	195/6899	0.0353363	0.0353363	0.418436	BMP7/CALR/CAMK2A/EPM2AIP1/FIBIN/GHRL/GPER1/KRT19/OGT/SLC2A4	10	BP
GO:0010975	regulation of neuron projection development	6/184	92/6899	0.0357609	0.0357609	0.418436	BMP7/CNTN1/EPHA7/ISLR2/LZTS1/NTN1	6	BP
GO:0010927	cellular component assembly involved in morphogenesis	4/184	47/6899	0.0358411	0.0358411	0.418436	CASQ1/CNTN1/FLNC/KRT19	4	BP
GO:0030856	regulation of epithelial cell differentiation	4/184	47/6899	0.0358411	0.0358411	0.418436	BMP7/CLDN5/ETV4/NKX2-2	4	BP
GO:0051048	negative regulation of secretion	4/184	47/6899	0.0358411	0.0358411	0.418436	CHGA/GAL/GHRL/RSAD2	4	BP
GO:0050801	ion homeostasis	10/184	196/6899	0.0364056	0.0364056	0.418436	ATP1A2/CALCB/CALCB/CASQ1/CXCL11/GPER1/HRC/MT1A/RAB38/RHBG	10	BP
GO:0120035	regulation of plasma membrane bounded cell projection organization	8/184	143/6899	0.0369602	0.0369602	0.418436	BMP7/CNTN1/EPHA7/ISLR2/LZTS1/NTN1/PODXL/WRAP73	8	BP
GO:0046879	hormone secretion	6/184	93/6899	0.0374141	0.0374141	0.418436	CHGA/GAL/GHRL/GIP/GPER1/VIP	6	BP
GO:0046888	negative regulation of hormone secretion	3/184	28/6899	0.0374961	0.0374961	0.418436	CHGA/GAL/GHRL	3	BP
GO:0051304	chromosome separation	3/184	28/6899	0.0374961	0.0374961	0.418436	GEN1/RMI1/ZWINT	3	BP
GO:1901343	negative regulation of vasculature development	3/184	28/6899	0.0374961	0.0374961	0.418436	ANGPTL7/CLDN5/THBS2	3	BP
GO:0000278	mitotic cell cycle	12/184	253/6899	0.0375804	0.0375804	0.418436	BMP7/CCNB2/GEN1/IQGAP3/KIF20A/LZTS1/MCM3/NLE1/NUF2/SKA1/WRAP73/ZWINT	12	BP
GO:0051707	response to other organism	18/184	431/6899	0.0381705	0.0381705	0.418436	BST2/C2/C6/C9/CFB/CFP/CHGA/CXCL11/DHX58/HMGB3/IFITM3/IRF7/ISG15/MX1/OASL/REG4/RSAD2/TRIM59	18	BP
GO:0006937	regulation of muscle contraction	4/184	48/6899	0.0383133	0.0383133	0.418436	CASQ1/GJA5/GPER1/KCNMA1	4	BP
GO:0008361	regulation of cell size	4/184	48/6899	0.0383133	0.0383133	0.418436	EPHA7/IQGAP3/ISLR2/NTN1	4	BP
GO:0051783	regulation of nuclear division	4/184	48/6899	0.0383133	0.0383133	0.418436	BMP7/CALR/GEN1/ZWINT	4	BP
GO:0031396	regulation of protein ubiquitination	5/184	70/6899	0.0383655	0.0383655	0.418436	BAG2/CDC20/FANCI/ISG15/OGT	5	BP
GO:0051962	positive regulation of nervous system development	5/184	70/6899	0.0383655	0.0383655	0.418436	GHRL/GPER1/ISLR2/NKX2-2/NTN1	5	BP
GO:0098662	inorganic cation transmembrane transport	9/184	171/6899	0.038866	0.038866	0.418436	ATP1A2/CACNA1D/CASQ1/CXCL11/GPER1/HRC/KCNK1/KCNN3/RHBG	9	BP
GO:0043207	response to external biotic stimulus	18/184	432/6899	0.0389144	0.0389144	0.418436	BST2/C2/C6/C9/CFB/CFP/CHGA/CXCL11/DHX58/HMGB3/IFITM3/IRF7/ISG15/MX1/OASL/REG4/RSAD2/TRIM59	18	BP
GO:0009069	serine family amino acid metabolic process	2/184	12/6899	0.039172	0.039172	0.418436	DCTPP1/MTHFD1	2	BP
GO:0030212	hyaluronan metabolic process	2/184	12/6899	0.039172	0.039172	0.418436	ITIH4/SPAM1	2	BP
GO:0032387	negative regulation of intracellular transport	2/184	12/6899	0.039172	0.039172	0.418436	APOD/DERL3	2	BP
GO:0032392	DNA geometric change	2/184	12/6899	0.039172	0.039172	0.418436	MCM2/MCM3	2	BP
GO:0043303	mast cell degranulation	2/184	12/6899	0.039172	0.039172	0.418436	CHGA/PTGDS	2	BP
GO:0045823	positive regulation of heart contraction	2/184	12/6899	0.039172	0.039172	0.418436	ADM5/HRC	2	BP
GO:0070613	regulation of protein processing	2/184	12/6899	0.039172	0.039172	0.418436	BAG2/CLEC3B	2	BP
GO:0095500	acetylcholine receptor signaling pathway	2/184	12/6899	0.039172	0.039172	0.418436	CHRM1/CHRM2	2	BP
GO:0098926	postsynaptic signal transduction	2/184	12/6899	0.039172	0.039172	0.418436	CHRM1/CHRM2	2	BP
GO:1903524	positive regulation of blood circulation	2/184	12/6899	0.039172	0.039172	0.418436	ADM5/HRC	2	BP
GO:1905144	response to acetylcholine	2/184	12/6899	0.039172	0.039172	0.418436	CHRM1/CHRM2	2	BP
GO:1905145	cellular response to acetylcholine	2/184	12/6899	0.039172	0.039172	0.418436	CHRM1/CHRM2	2	BP
GO:0031344	regulation of cell projection organization	8/184	145/6899	0.039626	0.039626	0.420796	BMP7/CNTN1/EPHA7/ISLR2/LZTS1/NTN1/PODXL/WRAP73	8	BP
GO:0016064	immunoglobulin mediated immune response	4/184	49/6899	0.040881	0.040881	0.428663	C2/C6/C9/IRF7	4	BP
GO:0030239	myofibril assembly	3/184	29/6899	0.0410262	0.0410262	0.428663	CASQ1/FLNC/KRT19	3	BP
GO:0044419	biological process involved in interspecies interaction between organisms	19/184	467/6899	0.0421769	0.0421769	0.428663	BST2/C2/C6/C9/CFB/CFP/CHGA/CXCL11/DHX58/HMGB3/IFITM3/IRF7/ISG15/MX1/OASL/REG4/RSAD2/TMPRSS4/TRIM59	19	BP
GO:0009914	hormone transport	6/184	96/6899	0.0426644	0.0426644	0.428663	CHGA/GAL/GHRL/GIP/GPER1/VIP	6	BP
GO:0010721	negative regulation of cell development	4/184	50/6899	0.0435443	0.0435443	0.428663	BMP7/CCNB2/DNAJB11/EPHA7	4	BP
GO:0001701	in utero embryonic development	7/184	122/6899	0.044091	0.044091	0.428663	ASF1B/BMP7/CCNB2/KRT19/NLE1/PLPP4/RCN1	7	BP
GO:2000026	regulation of multicellular organismal development	16/184	378/6899	0.0444181	0.0444181	0.428663	ANGPTL7/ASPN/BMP7/CLDN5/DNAJB11/EPHA7/ETV4/GHRL/GPER1/ISG15/ISLR2/ITGA5/NKX2-2/NTN1/PTPRZ1/THBS2	16	BP
GO:0009135	purine nucleoside diphosphate metabolic process	3/184	30/6899	0.0447178	0.0447178	0.428663	ALDOC/ENO2/OGT	3	BP
GO:0009179	purine ribonucleoside diphosphate metabolic process	3/184	30/6899	0.0447178	0.0447178	0.428663	ALDOC/ENO2/OGT	3	BP
GO:0009185	ribonucleoside diphosphate metabolic process	3/184	30/6899	0.0447178	0.0447178	0.428663	ALDOC/ENO2/OGT	3	BP
GO:0046031	ADP metabolic process	3/184	30/6899	0.0447178	0.0447178	0.428663	ALDOC/ENO2/OGT	3	BP
GO:0048709	oligodendrocyte differentiation	3/184	30/6899	0.0447178	0.0447178	0.428663	CNTN1/NKX2-2/PTPRZ1	3	BP
GO:0055002	striated muscle cell development	3/184	30/6899	0.0447178	0.0447178	0.428663	CASQ1/FLNC/KRT19	3	BP
GO:1904064	positive regulation of cation transmembrane transport	3/184	30/6899	0.0447178	0.0447178	0.428663	CASQ1/CXCL11/GPER1	3	BP
GO:2001251	negative regulation of chromosome organization	3/184	30/6899	0.0447178	0.0447178	0.428663	GEN1/MCM2/ZWINT	3	BP
GO:0002115	store-operated calcium entry	2/184	13/6899	0.0454974	0.0454974	0.428663	CASQ1/SPINK1	2	BP
GO:0002279	mast cell activation involved in immune response	2/184	13/6899	0.0454974	0.0454974	0.428663	CHGA/PTGDS	2	BP
GO:0002448	mast cell mediated immunity	2/184	13/6899	0.0454974	0.0454974	0.428663	CHGA/PTGDS	2	BP
GO:0014003	oligodendrocyte development	2/184	13/6899	0.0454974	0.0454974	0.428663	CNTN1/NKX2-2	2	BP
GO:0032094	response to food	2/184	13/6899	0.0454974	0.0454974	0.428663	GAST/GHRL	2	BP
GO:1903047	mitotic cell cycle process	10/184	204/6899	0.0457814	0.0457814	0.428663	BMP7/CCNB2/GEN1/IQGAP3/KIF20A/LZTS1/MCM3/NUF2/WRAP73/ZWINT	10	BP
GO:0000724	double-strand break repair via homologous recombination	4/184	51/6899	0.0463031	0.0463031	0.428663	FIGNL1/GEN1/MCM3/RMI1	4	BP
GO:0000725	recombinational repair	4/184	51/6899	0.0463031	0.0463031	0.428663	FIGNL1/GEN1/MCM3/RMI1	4	BP
GO:0008016	regulation of heart contraction	4/184	51/6899	0.0463031	0.0463031	0.428663	ADM5/CHRM2/GJA5/HRC	4	BP
GO:0050769	positive regulation of neurogenesis	4/184	51/6899	0.0463031	0.0463031	0.428663	GPER1/ISLR2/NKX2-2/NTN1	4	BP
GO:0031346	positive regulation of cell projection organization	5/184	74/6899	0.0469565	0.0469565	0.432494	BMP7/CNTN1/ISLR2/NTN1/WRAP73	5	BP
GO:0061564	axon development	7/184	124/6899	0.0474348	0.0474348	0.434682	APOD/BMP7/CNTN1/EPHA7/ISLR2/NTN1/PTPRZ1	7	BP
GO:0062207	regulation of pattern recognition receptor signaling pathway	3/184	31/6899	0.0485689	0.0485689	0.442826	DHX58/IRF7/RSAD2	3	BP
GO:1903320	regulation of protein modification by small protein conjugation or removal	5/184	75/6899	0.049269	0.049269	0.446952	BAG2/CDC20/FANCI/ISG15/OGT	5	BP
GO:0099503	secretory vesicle	12/203	148/7848	0.000432723	0.000432723	0.0933771	CALR/CFP/CHGA/GAL/RAB26/SCG2/SCG5/SPAM1/SYNGR3/SYP/SYT13/TMPRSS4	12	CC
GO:0099512	supramolecular fiber	15/203	246/7848	0.00173978	0.00173978	0.102873	ACTN2/BAG2/CASQ1/GPER1/HRC/INA/KIF18B/KIF20A/KIF2C/KIFC1/KRT19/MX1/MYOM1/PRPH/SKA1	15	CC
GO:0099081	supramolecular polymer	15/203	247/7848	0.00181068	0.00181068	0.102873	ACTN2/BAG2/CASQ1/GPER1/HRC/INA/KIF18B/KIF20A/KIF2C/KIFC1/KRT19/MX1/MYOM1/PRPH/SKA1	15	CC
GO:0030141	secretory granule	8/203	88/7848	0.00190692	0.00190692	0.102873	CALR/CFP/CHGA/GAL/SCG2/SCG5/SPAM1/TMPRSS4	8	CC
GO:0045202	synapse	17/203	312/7848	0.00290723	0.00290723	0.107065	CAMK2A/CHRDL1/CHRM1/CHRM2/CNTN1/EPHA7/GPER1/INA/ITGA5/KCNK1/LZTS1/PTPRZ1/RAB26/SYNGR3/SYP/SYT13/TAC1	17	CC
GO:0043005	neuron projection	16/203	288/7848	0.00317407	0.00317407	0.107065	APOD/BAG2/CAMK2A/CHRM1/CNTN1/EPHA7/GHRL/KCNK1/KCNN3/LZTS1/PNLIPRP2/PRPH/STMN4/SYP/SYT13/TAC1	16	CC
GO:0031225	anchored component of membrane	5/203	40/7848	0.00347307	0.00347307	0.107065	CNTN1/GFRA1/GPC1/RAB26/RHBG	5	CC
GO:0048471	perinuclear region of cytoplasm	10/203	153/7848	0.00622477	0.00622477	0.167905	APOD/ATP2C2/CALR/FIGNL1/GPER1/MCM3/MX1/PTGDS/S100A4/SLC2A4	10	CC
GO:0099513	polymeric cytoskeletal fiber	11/203	183/7848	0.00778702	0.00778702	0.186706	BAG2/GPER1/INA/KIF18B/KIF20A/KIF2C/KIFC1/KRT19/MX1/PRPH/SKA1	11	CC
GO:0030863	cortical cytoskeleton	3/203	18/7848	0.0104459	0.0104459	0.221643	ACTN2/CLDN5/KRT19	3	CC
GO:0030018	Z disc	4/203	35/7848	0.0121523	0.0121523	0.221643	ACTN2/CASQ1/HRC/KRT19	4	CC
GO:0099080	supramolecular complex	17/203	363/7848	0.012743	0.012743	0.221643	ACTN2/BAG2/CASQ1/GPER1/HRC/INA/KIF18B/KIF20A/KIF2C/KIFC1/KRT19/MX1/MYOM1/NUF2/PRPH/SKA1/ZWINT	17	CC
GO:0031674	I band	4/203	37/7848	0.0147284	0.0147284	0.221643	ACTN2/CASQ1/HRC/KRT19	4	CC
GO:0036477	somatodendritic compartment	9/203	153/7848	0.017575	0.017575	0.221643	APOD/BAG2/CAMK2A/CHRM1/ENO2/KCNK1/KCNN3/LZTS1/TAC1	9	CC
GO:0030312	external encapsulating structure	8/203	128/7848	0.017716	0.017716	0.221643	ANGPTL7/ASPN/COL8A1/GPC1/LTBP2/NTN1/PTPRZ1/TNXB	8	CC
GO:0031012	extracellular matrix	8/203	128/7848	0.017716	0.017716	0.221643	ANGPTL7/ASPN/COL8A1/GPC1/LTBP2/NTN1/PTPRZ1/TNXB	8	CC
GO:0046658	anchored component of plasma membrane	3/203	22/7848	0.0182783	0.0182783	0.221643	CNTN1/GPC1/RHBG	3	CC
GO:0062023	collagen-containing extracellular matrix	5/203	60/7848	0.0190495	0.0190495	0.221643	ANGPTL7/GPC1/NTN1/PTPRZ1/TNXB	5	CC
GO:0005788	endoplasmic reticulum lumen	3/203	23/7848	0.0206277	0.0206277	0.221643	CALR/CASQ1/PDIA3	3	CC
GO:0005874	microtubule	7/203	108/7848	0.0216208	0.0216208	0.221643	BAG2/KIF18B/KIF20A/KIF2C/KIFC1/MX1/SKA1	7	CC
GO:0030017	sarcomere	5/203	62/7848	0.0216614	0.0216614	0.221643	ACTN2/CASQ1/HRC/KRT19/MYOM1	5	CC
GO:0005882	intermediate filament	4/203	42/7848	0.0225968	0.0225968	0.221643	GPER1/INA/KRT19/PRPH	4	CC
GO:0030672	synaptic vesicle membrane	3/203	26/7848	0.0286237	0.0286237	0.257362	RAB26/SYNGR3/SYP	3	CC
GO:0099501	exocytic vesicle membrane	3/203	26/7848	0.0286237	0.0286237	0.257362	RAB26/SYNGR3/SYP	3	CC
GO:0005685	U1 snRNP	2/203	11/7848	0.031404	0.031404	0.270514	PRPF39/SNRPF	2	CC
GO:0043025	neuronal cell body	5/203	69/7848	0.0325937	0.0325937	0.270514	APOD/ENO2/KCNK1/KCNN3/TAC1	5	CC
GO:0030016	myofibril	5/203	72/7848	0.0381674	0.0381674	0.294148	ACTN2/CASQ1/HRC/KRT19/MYOM1	5	CC
GO:0043292	contractile fiber	5/203	72/7848	0.0381674	0.0381674	0.294148	ACTN2/CASQ1/HRC/KRT19/MYOM1	5	CC
GO:0045111	intermediate filament cytoskeleton	4/203	51/7848	0.0422285	0.0422285	0.309718	GPER1/INA/KRT19/PRPH	4	CC
GO:0005921	gap junction	2/203	13/7848	0.0430584	0.0430584	0.309718	GJA5/GJB1	2	CC
GO:0016529	sarcoplasmic reticulum	2/203	14/7848	0.0493968	0.0493968	0.343849	CALR/CASQ1	2	CC
GO:0005179	hormone activity	10/176	83/7135	3.31008e-05	3.31008e-05	0.00930307	ADM5/CALCB/CALCB/GAL/GAST/GHRL/GIP/PYY/SST/VIP	10	MF
GO:0003777	microtubule motor activity	4/176	16/7135	0.000516257	0.000516257	0.0537905	KIF18B/KIF20A/KIF2C/KIFC1	4	MF
GO:0005509	calcium ion binding	16/176	257/7135	0.000574169	0.000574169	0.0537905	ACTN2/ASPN/CABP1/CALR/CASQ1/CLEC3B/HRC/KCNIP2/LTBP2/PLCB4/RCN1/S100A2/S100A4/SYT13/THBD/THBS2	16	MF
GO:0005227	calcium activated cation channel activity	3/176	10/7135	0.00155832	0.00155832	0.0750529	KCNMA1/KCNMB1/KCNN3	3	MF
GO:0140358	P-type transmembrane transporter activity	3/176	10/7135	0.00155832	0.00155832	0.0750529	ATP1A2/ATP1A3/ATP2C2	3	MF
GO:0140657	ATP-dependent activity	13/176	205/7135	0.00160225	0.00160225	0.0750529	ATP1A2/ATP1A3/ATP2C2/ATP6V1C2/DHX58/FIGNL1/HELLS/KIF18B/KIF20A/KIF2C/KIFC1/MCM2/MCM3	13	MF
GO:0022839	ion gated channel activity	3/176	12/7135	0.00275479	0.00275479	0.110419	KCNMA1/KCNMB1/KCNN3	3	MF
GO:0008017	microtubule binding	7/176	79/7135	0.00320737	0.00320737	0.110419	KIF18B/KIF20A/KIF2C/KIFC1/LZTS1/MX1/SKA1	7	MF
GO:0015079	potassium ion transmembrane transporter activity	6/176	63/7135	0.00438751	0.00438751	0.110419	ATP1A2/ATP1A3/KCNK1/KCNMA1/KCNMB1/KCNN3	6	MF
GO:0003774	cytoskeletal motor activity	4/176	28/7135	0.00461102	0.00461102	0.110419	KIF18B/KIF20A/KIF2C/KIFC1	4	MF
GO:0019829	ATPase-coupled cation transmembrane transporter activity	4/176	28/7135	0.00461102	0.00461102	0.110419	ATP1A2/ATP1A3/ATP2C2/ATP6V1C2	4	MF
GO:0048018	receptor ligand activity	15/176	287/7135	0.00471452	0.00471452	0.110419	ADM5/BMP7/CALCB/CALCB/CCL21/CXCL11/EPHA7/GAL/GAST/GHRL/GIP/NTN1/PYY/SST/VIP	15	MF
GO:0030546	signaling receptor activator activity	15/176	291/7135	0.00535317	0.00535317	0.115733	ADM5/BMP7/CALCB/CALCB/CCL21/CXCL11/EPHA7/GAL/GAST/GHRL/GIP/NTN1/PYY/SST/VIP	15	MF
GO:0015631	tubulin binding	8/176	111/7135	0.00595851	0.00595851	0.119618	KIF18B/KIF20A/KIF2C/KIFC1/LZTS1/MX1/SKA1/STMN4	8	MF
GO:0030545	signaling receptor regulator activity	15/176	300/7135	0.00704876	0.00704876	0.132071	ADM5/BMP7/CALCB/CALCB/CCL21/CXCL11/EPHA7/GAL/GAST/GHRL/GIP/NTN1/PYY/SST/VIP	15	MF
GO:0016462	pyrophosphatase activity	13/176	258/7135	0.0111426	0.0111426	0.185776	ATP1A2/ATP1A3/ATP2C2/DCTPP1/DHX58/DIRAS3/FIGNL1/GPN2/MCM3/MX1/PLPP4/RAB26/RAB38	13	MF
GO:0016818	hydrolase activity, acting on acid anhydrides, in phosphorus-containing anhydrides	13/176	261/7135	0.0121925	0.0121925	0.185776	ATP1A2/ATP1A3/ATP2C2/DCTPP1/DHX58/DIRAS3/FIGNL1/GPN2/MCM3/MX1/PLPP4/RAB26/RAB38	13	MF
GO:0005178	integrin binding	4/176	37/7135	0.0125281	0.0125281	0.185776	CALR/ISG15/ITGA5/PTPRZ1	4	MF
GO:0016817	hydrolase activity, acting on acid anhydrides	13/176	262/7135	0.012559	0.012559	0.185776	ATP1A2/ATP1A3/ATP2C2/DCTPP1/DHX58/DIRAS3/FIGNL1/GPN2/MCM3/MX1/PLPP4/RAB26/RAB38	13	MF
GO:0016887	ATP hydrolysis activity	6/176	80/7135	0.0137797	0.0137797	0.193641	ATP1A2/ATP1A3/ATP2C2/DHX58/FIGNL1/MCM3	6	MF
GO:0042626	ATPase-coupled transmembrane transporter activity	4/176	41/7135	0.0178069	0.0178069	0.238318	ATP1A2/ATP1A3/ATP2C2/ATP6V1C2	4	MF
GO:0046873	metal ion transmembrane transporter activity	9/176	164/7135	0.019878	0.019878	0.249544	ATP1A2/ATP1A3/ATP2C2/CACNA1D/KCNK1/KCNMA1/KCNMB1/KCNN3/SLC5A8	9	MF
GO:0030246	carbohydrate binding	7/176	112/7135	0.0204215	0.0204215	0.249544	CALR/CLEC3B/CNTN1/EMC7/GALNT16/REG4/SELP	7	MF
GO:0016645	oxidoreductase activity, acting on the CH-NH group of donors	2/176	10/7135	0.0239038	0.0239038	0.279927	BLVRB/MTHFD1	2	MF
GO:0017111	ribonucleoside triphosphate phosphatase activity	11/176	230/7135	0.0266038	0.0266038	0.299083	ATP1A2/ATP1A3/ATP2C2/DHX58/DIRAS3/FIGNL1/GPN2/MCM3/MX1/RAB26/RAB38	11	MF
GO:0004867	serine-type endopeptidase inhibitor activity	4/176	47/7135	0.0280044	0.0280044	0.299251	ITIH4/SERPINA1/SPINK1/SPINK4	4	MF
GO:0051787	misfolded protein binding	2/176	11/7135	0.0287482	0.0287482	0.299251	DERL3/DNAJB11	2	MF
GO:0008092	cytoskeletal protein binding	14/176	326/7135	0.0302134	0.0302134	0.30327	ACTN2/BAG2/FLNC/IQGAP3/KIF18B/KIF20A/KIF2C/KIFC1/LZTS1/MX1/RHBG/SKA1/STMN4/TAGLN	14	MF
GO:0022890	inorganic cation transmembrane transporter activity	11/176	239/7135	0.0339125	0.0339125	0.328662	ATP1A2/ATP1A3/ATP2C2/ATP6V1C2/CACNA1D/KCNK1/KCNMA1/KCNMB1/KCNN3/RHBG/SLC5A8	11	MF
GO:0005267	potassium channel activity	4/176	51/7135	0.0363948	0.0363948	0.340962	KCNK1/KCNMA1/KCNMB1/KCNN3	4	MF
GO:0022829	wide pore channel activity	2/176	13/7135	0.0394797	0.0394797	0.34964	GJA5/GJB1	2	MF
GO:0050839	cell adhesion molecule binding	5/176	77/7135	0.0409996	0.0409996	0.34964	CALR/CNTN1/ISG15/ITGA5/PTPRZ1	5	MF
GO:0008201	heparin binding	4/176	53/7135	0.0410776	0.0410776	0.34964	CLEC3B/CXCL11/REG4/THBS2	4	MF
GO:0001664	G protein-coupled receptor binding	7/176	131/7135	0.0428381	0.0428381	0.34964	CALCB/CALCB/CCL21/CXCL11/GAL/GHRL/TAC1	7	MF
GO:0004386	helicase activity	4/176	54/7135	0.0435414	0.0435414	0.34964	DHX58/HELLS/MCM2/MCM3	4	MF
