# Supplementary material for: The Metabolic Pathway of Bile Secretion Is Vulnerable to Salmonella enterica Exposure in Porcine Intestinal Epithelial Cells
Source: Animals (Basel). 2024 Mar 3;14(5):789. doi: 10.3390/ani14050789 (PMC10931422; doi:10.3390/ani14050789)
Supplement: Supplementary file 1 [file animals-14-00789-s001.zip › Table S13. Signaling pathway associate with up and DOWN-regulated genes between Salmonella infection and LPS treated .xlsx]

## Sheet: Up-regulated genes enriched
ID	Description	GeneRatio	BgRatio	pvalue	p.adjust	qvalue	geneID	Count
ssc05340	Primary immunodeficiency	7/218	36/9206	1.76409e-05	1.76409e-05	0.00217707	CD3D/CD8A/ICOS/IL2RG/IL7R/LCK/TNFRSF13C	7
ssc05208	Chemical carcinogenesis - reactive oxygen species	17/218	227/9206	2.62189e-05	2.62189e-05	0.00217707	CAT/COX3/CYTB/EPHX2/GSTA1/LOC100153094/MAP2K1/NCF2/ND3/ND4/ND4L/NRAS/PTEN/RAF1/SDHC/SLC25A5/SOD2	17
ssc05132	Salmonella infection	18/218	253/9206	3.01196e-05	3.01196e-05	0.00217707	ARPC5/CASP3/CASP7/CTNNB1/CYTH4/DYNLT3/LOC733637/LY96/MAP2K1/MRLC2/MYD88/NLRP3/PFN2/RAB5B/RAB7B/RAF1/TCF7/TUBAL3	18
ssc05235	PD-L1 expression and PD-1 checkpoint pathway in cancer	10/218	95/9206	7.86306e-05	7.86306e-05	0.00426261	CD3D/CD3G/LCK/MAP2K1/MYD88/NFATC3/NRAS/PTEN/RAF1/STAT3	10
ssc04145	Phagosome	12/218	145/9206	0.000162621	0.000162621	0.00698399	ATP6V1A/ATP6V1G1/CD209/FCGR3A/LOC100511343/MSR1/NCF2/OLR1/RAB5B/RAB7B/SLA-DRA/TUBAL3	12
ssc05417	Lipid and atherosclerosis	15/218	217/9206	0.000193246	0.000193246	0.00698399	CASP3/CASP7/CASP9/HSPA6/LOC100511343/LY96/MMP9/MYD88/NCF2/NFATC3/NLRP3/NRAS/OLR1/SOD2/STAT3	15
ssc04068	FoxO signaling pathway	11/218	130/9206	0.000250882	0.000250882	0.00704631	ATG12/CAT/CDKN2B/GABARAP/IL7R/MAP2K1/NRAS/PTEN/RAF1/SOD2/STAT3	11
ssc05166	Human T-cell leukemia virus 1 infection	15/218	225/9206	0.000286548	0.000286548	0.00704631	CD3D/CD3G/CDKN2B/CREB5/IL2RG/LCK/MAP2K1/NFATC3/NRAS/PTEN/SLA-DRA/SLC25A5/SPI1/TBP/TNFRSF13C	15
ssc04148	Efferocytosis	12/218	155/9206	0.000303476	0.000303476	0.00704631	ADAM10/CASP3/DUSP7/GPR132/LIPA/LOC100511343/LOC100513863/MAP2K1/NFATC3/P2RY12/RAB5B/RAB7B	12
ssc04658	Th1 and Th2 cell differentiation	9/218	93/9206	0.000340408	0.000340408	0.00704631	CD3D/CD3G/IL2RG/LCK/MAF/MAML1/NFATC3/SLA-DRA/TBX21	9
ssc05415	Diabetic cardiomyopathy	14/218	205/9206	0.000357446	0.000357446	0.00704631	COX3/CYTB/LOC100511343/LOC100515049/MMP9/NCF2/ND3/ND4/ND4L/PPARA/PPP1CC/PTEN/SDHC/SLC25A5	14
ssc05213	Endometrial cancer	7/218	58/9206	0.000408618	0.000408618	0.00719953	CASP9/CTNNB1/MAP2K1/NRAS/PTEN/RAF1/TCF7	7
ssc05215	Prostate cancer	9/218	96/9206	0.000431622	0.000431622	0.00719953	CASP9/CREB5/CTNNB1/MAP2K1/MMP9/NRAS/PTEN/RAF1/TCF7	9
ssc05134	Legionellosis	7/218	60/9206	0.000504282	0.000504282	0.00781069	CASP3/CASP7/CASP9/HSPA6/MYD88/RAB1A/RAB1B	7
ssc04660	T cell receptor signaling pathway	10/218	125/9206	0.000745065	0.000745065	0.0107708	CD3D/CD3G/CD8A/ICOS/LCK/MAP2K1/NFATC3/NRAS/PAK6/RAF1	10
ssc04810	Regulation of actin cytoskeleton	14/218	228/9206	0.00102814	0.00102814	0.0139339	ARPC5/C7/CXCR4/EZR/LOC733637/MAP2K1/MRLC2/NRAS/PAK6/PFN2/PIP4K2A/PPP1CC/RAF1/RDX	14
ssc05210	Colorectal cancer	8/218	89/9206	0.00118356	0.00118356	0.0145411	APPL1/CASP3/CASP9/CTNNB1/MAP2K1/NRAS/RAF1/TCF7	8
ssc05205	Proteoglycans in cancer	13/218	206/9206	0.00120705	0.00120705	0.0145411	CASP3/CBL/CTNNB1/EZR/HPSE2/MAP2K1/MMP9/NRAS/PDCD4/PPP1CC/RAF1/RDX/STAT3	13
ssc05216	Thyroid cancer	5/218	36/9206	0.00147357	0.00147357	0.0168175	CTNNB1/MAP2K1/NRAS/TCF7/TFG	5
ssc04144	Endocytosis	14/218	240/9206	0.00167709	0.00167709	0.0181832	ARPC5/CAPZA1/CBL/CHMP1B/CHMP5/CXCR4/CYTH4/HSPA6/IL2RG/PARD6G/RAB11A/RAB5B/SNX3/TSG101	14
ssc03320	PPAR signaling pathway	7/218	78/9206	0.00240964	0.00240964	0.0248815	ANGPTL4/FABP2/FABP5/LOC100511343/OLR1/PPARA/SCP2	7
ssc04962	Vasopressin-regulated water reabsorption	5/218	43/9206	0.00329082	0.00329082	0.0324359	AQP3/ARHGDIB/CREB5/RAB11A/RAB5B	5
ssc05145	Toxoplasmosis	8/218	106/9206	0.00359017	0.00359017	0.0338478	BIRC7/CASP3/CASP9/HSPA6/LY96/MYD88/SLA-DRA/STAT3	8
ssc05221	Acute myeloid leukemia	6/218	66/9206	0.00458153	0.00458153	0.0412004	MAP2K1/NRAS/RAF1/SPI1/STAT3/TCF7	6
ssc04659	Th17 cell differentiation	8/218	111/9206	0.00475469	0.00475469	0.0412004	CD3D/CD3G/IL2RG/LCK/NFATC3/SLA-DRA/STAT3/TBX21	8
ssc04210	Apoptosis	9/218	136/9206	0.00494445	0.00494445	0.0412004	CASP3/CASP7/CASP9/CSF2RB/ENDOG/MAP2K1/NRAS/RAF1/TUBAL3	9
ssc05020	Prion disease	14/218	272/9206	0.0052141	0.0052141	0.0412004	C7/CASP3/CASP9/COX3/CREB5/CYTB/HSPA6/NCF2/ND3/ND4/ND4L/SDHC/SLC25A5/TUBAL3	14
ssc05164	Influenza A	10/218	163/9206	0.00532005	0.00532005	0.0412004	CASP3/CASP9/MAP2K1/MYD88/NLRP3/RAB11A/RAF1/RNASEL/SLA-DRA/SLC25A5	10
ssc05170	Human immunodeficiency virus 1 infection	12/218	219/9206	0.00583231	0.00583231	0.0424951	CASP3/CASP9/CD3D/CD3G/CXCR4/GNA11/MAP2K1/MYD88/NFATC3/NRAS/PAK6/RAF1	12
ssc04670	Leukocyte transendothelial migration	8/218	115/9206	0.00587917	0.00587917	0.0424951	CTNNB1/CXCR4/EZR/F11R/LOC733637/MMP9/MRLC2/NCF2	8
ssc05161	Hepatitis B	10/218	167/9206	0.00629268	0.00629268	0.0440167	CASP3/CASP9/CREB5/MAP2K1/MMP9/MYD88/NFATC3/NRAS/RAF1/STAT3	10
ssc05162	Measles	9/218	145/9206	0.00746566	0.00746566	0.0495311	CASP3/CASP9/CD209/CD3D/CD3G/HSPA6/IL2RG/MYD88/STAT3	9
ssc05163	Human cytomegalovirus infection	12/218	228/9206	0.00795674	0.00795674	0.0495311	CASP3/CASP9/CCL4/CREB5/CTNNB1/CXCR4/GNA11/MAP2K1/NFATC3/NRAS/RAF1/STAT3	12
ssc01524	Platinum drug resistance	6/218	74/9206	0.0079947	0.0079947	0.0495311	CASP3/CASP9/GSTA1/LOC100153094/POLH/SLC31A1	6
ssc04115	p53 signaling pathway	6/218	74/9206	0.0079947	0.0079947	0.0495311	CASP3/CASP9/CCNG1/PTEN/TP53I3/ZNF385A	6
ssc05207	Chemical carcinogenesis - receptor activation	11/218	202/9206	0.00852831	0.00852831	0.0513693	CREB5/EPHX2/GSTA1/KLF5/LOC100153094/LOC100623504/MAP2K1/NRAS/PPARA/RAF1/STAT3	11
ssc04215	Apoptosis - multiple species	4/218	35/9206	0.00901121	0.00901121	0.0528111	BIRC7/CASP3/CASP7/CASP9	4
ssc04218	Cellular senescence	9/218	154/9206	0.0108699	0.0108699	0.0620277	CDKN2B/MAP2K1/NFATC3/NRAS/PPP1CC/PTEN/RAF1/SLC25A5/ZFP36L2	9
ssc05160	Hepatitis C	9/218	158/9206	0.0127108	0.0127108	0.0706727	CASP3/CASP9/CTNNB1/MAP2K1/NRAS/PPARA/RAF1/RNASEL/STAT3	9
ssc05219	Bladder cancer	4/218	39/9206	0.0131556	0.0131556	0.0713172	MAP2K1/MMP9/NRAS/RAF1	4
ssc05016	Huntington disease	14/218	308/9206	0.0146912	0.0146912	0.0776994	CASP3/CASP9/COX3/CREB5/CYTB/GPX1/ND3/ND4/ND4L/SDHC/SLC25A5/SOD2/TBP/TUBAL3	14
ssc04061	Viral protein interaction with cytokine and cytokine receptor	6/218	85/9206	0.0152526	0.0152526	0.0787479	CCL11/CCL4/CCL8/CXCR4/IL2RG/LOC100516039	6
ssc00190	Oxidative phosphorylation	8/218	137/9206	0.0160175	0.0160175	0.0795486	ATP6V1A/ATP6V1G1/COX3/CYTB/ND3/ND4/ND4L/SDHC	8
ssc04650	Natural killer cell mediated cytotoxicity	7/218	111/9206	0.0161414	0.0161414	0.0795486	CASP3/FCGR3A/HCST/LCK/MAP2K1/NRAS/RAF1	7
ssc04146	Peroxisome	6/218	87/9206	0.0169441	0.0169441	0.0816486	AMACR/CAT/EPHX2/PEX7/SCP2/SOD2	6
ssc04640	Hematopoietic cell lineage	6/218	89/9206	0.0187606	0.0187606	0.0884366	CD3D/CD3G/CD8A/IL7R/LOC100511343/SLA-DRA	6
ssc05010	Alzheimer disease	16/218	384/9206	0.0200313	0.0200313	0.0924174	ADAM10/CASP3/CASP7/CASP9/COX3/CTNNB1/CYTB/MAP2K1/ND3/ND4/ND4L/NRAS/RAF1/SDHC/SLC25A5/TUBAL3	16
ssc05321	Inflammatory bowel disease	5/218	67/9206	0.0209462	0.0209462	0.0946256	IL2RG/MAF/SLA-DRA/STAT3/TBX21	5
ssc05211	Renal cell carcinoma	5/218	68/9206	0.0221874	0.0221874	0.0981868	EPAS1/MAP2K1/NRAS/PAK6/RAF1	5
ssc05165	Human papillomavirus infection	14/218	328/9206	0.0239104	0.0239104	0.103696	ATP6V1A/ATP6V1G1/CASP3/COL6A5/CREB5/CTNNB1/MAML1/MAP2K1/NRAS/PARD6G/PTEN/RAF1/TBP/TCF7	14
ssc05223	Non-small cell lung cancer	5/218	70/9206	0.0248106	0.0248106	0.10549	CASP9/MAP2K1/NRAS/RAF1/STAT3	5
ssc05014	Amyotrophic lateral sclerosis	15/218	364/9206	0.0260959	0.0260959	0.108821	CASP3/CASP9/CAT/COX3/CYTB/GPX1/ND3/ND4/ND4L/NUP62/PFN2/RAB1A/SDHC/SRSF3/TUBAL3	15
ssc04062	Chemokine signaling pathway	9/218	182/9206	0.0289428	0.0289428	0.117362	CCL11/CCL4/CCL8/CXCR4/LOC100516039/MAP2K1/NRAS/RAF1/STAT3	9
ssc04672	Intestinal immune network for IgA production	4/218	50/9206	0.0301538	0.0301538	0.117362	CXCR4/ICOS/SLA-DRA/TNFRSF13C	4
ssc04979	Cholesterol metabolism	4/218	50/9206	0.0301538	0.0301538	0.117362	ANGPTL4/LIPA/LOC100511343/MYLIP	4
ssc05133	Pertussis	5/218	74/9206	0.0306358	0.0306358	0.117362	CASP3/CASP7/LY96/MYD88/NLRP3	5
ssc04390	Hippo signaling pathway	8/218	155/9206	0.0308503	0.0308503	0.117362	BMP5/BMP8B/CTNNB1/PARD6G/PPP1CC/SAV1/SNAI2/TCF7	8
ssc05022	Pathways of neurodegeneration - multiple diseases	18/218	474/9206	0.0321374	0.0321374	0.120151	CASP3/CASP7/CASP9/CAT/COX3/CTNNB1/CYTB/GPX1/MAP2K1/ND3/ND4/ND4L/NRAS/RAB1A/RAF1/SDHC/SLC25A5/TUBAL3	18
ssc05310	Asthma	3/218	30/9206	0.0332401	0.0332401	0.122167	CCL11/MS4A2/SLA-DRA	3
ssc04623	Cytosolic DNA-sensing pathway	5/218	76/9206	0.0338449	0.0338449	0.122317	CASP3/CASP7/CCL4/NLRP3/POLR3K	5
ssc00052	Galactose metabolism	3/218	31/9206	0.036177	0.036177	0.128602	GLA/LOC100625897/UGP2	3
ssc01521	EGFR tyrosine kinase inhibitor resistance	5/218	78/9206	0.0372556	0.0372556	0.1303	MAP2K1/NRAS/PTEN/RAF1/STAT3	5
ssc05225	Hepatocellular carcinoma	8/218	163/9206	0.0397705	0.0397705	0.136888	CTNNB1/GSTA1/LOC100153094/MAP2K1/NRAS/PTEN/RAF1/TCF7	8
ssc04140	Autophagy - animal	8/218	165/9206	0.0422442	0.0422442	0.140845	ATG12/GABARAP/MAP2K1/NRAS/PTEN/RAB1A/RAB7B/RAF1	8
ssc04910	Insulin signaling pathway	7/218	136/9206	0.042573	0.042573	0.140845	CBL/MAP2K1/NRAS/PPP1CC/PRKAR2A/PRKAR2B/RAF1	7
ssc05167	Kaposi sarcoma-associated herpesvirus infection	9/218	196/9206	0.0432905	0.0432905	0.140845	CASP3/CASP9/CTNNB1/MAP2K1/NFATC3/NRAS/RAF1/STAT3/TCF7	9
ssc04530	Tight junction	8/218	166/9206	0.0435185	0.0435185	0.140845	ARPC5/EZR/F11R/LOC733637/MRLC2/PARD6G/RDX/TUBAL3	8
ssc00480	Glutathione metabolism	4/218	57/9206	0.0455816	0.0455816	0.143085	GPX1/GSTA1/LOC100153094/PRDX6	4
ssc04370	VEGF signaling pathway	4/218	57/9206	0.0455816	0.0455816	0.143085	CASP9/MAP2K1/NRAS/RAF1	4
ssc04931	Insulin resistance	6/218	110/9206	0.0462331	0.0462331	0.143085	CREB5/LOC100511343/PPARA/PPP1CC/PTEN/STAT3	6
ssc00980	Metabolism of xenobiotics by cytochrome P450	4/218	58/9206	0.0480856	0.0480856	0.143085	AKR7A2/GSTA1/LOC100153094/LOC100623504	4
ssc04510	Focal adhesion	9/218	200/9206	0.0481384	0.0481384	0.143085	COL6A5/CTNNB1/LOC733637/MAP2K1/MRLC2/PAK6/PPP1CC/PTEN/RAF1	9
ssc04012	ErbB signaling pathway	5/218	84/9206	0.0487177	0.0487177	0.143085	CBL/MAP2K1/NRAS/PAK6/RAF1	5
ssc04714	Thermogenesis	10/218	232/9206	0.0490343	0.0490343	0.143085	BMP8B/COX3/CREB5/CYTB/ND3/ND4/ND4L/NDUFAF1/NRAS/SDHC	10
ssc01200	Carbon metabolism	6/218	112/9206	0.0497113	0.0497113	0.143085	CAT/GPT2/IDH3A/MCEE/RPIA/SDHC	6

## Sheet: Down-regulated genes enriched
ID	Description	GeneRatio	BgRatio	pvalue	p.adjust	qvalue	geneID	Count
ssc04911	Insulin secretion	10/204	85/9206	1.68611e-05	1.68611e-05	0.00295395	ATP1A2/ATP1A3/CACNA1D/CAMK2A/GIP/KCNMA1/KCNMB1/KCNN3/PLCB4/SNAP25	10
ssc04512	ECM-receptor interaction	10/204	90/9206	2.79982e-05	2.79982e-05	0.00295395	COL4A6/FN1/FREM2/ITGA1/ITGA5/ITGA7/LAMC1/THBS2/THBS4/TNXB	10
ssc04024	cAMP signaling pathway	16/204	225/9206	3.80939e-05	3.80939e-05	0.00295395	ABCC4/ATP1A2/ATP1A3/CACNA1D/CAMK2A/CHRM1/CHRM2/CNGA3/GHRL/GIP/GIPR/GRIA1/MAPK10/NPR1/SST/VIP	16
ssc03030	DNA replication	6/204	35/9206	0.000104406	0.000104406	0.00607205	DNA2/LIG1/MCM2/MCM3/POLE/POLE2	6
ssc04080	Neuroactive ligand-receptor interaction	18/204	368/9206	0.00133994	0.00133994	0.0623425	CALCB/CALCB/CHRM1/CHRM2/GAL/GHRL/GIP/GIPR/GRIA1/GRP/LYPD6B/PENK/PYY/SST/TAC1/UCN3/VGF/VIP	18
ssc04610	Complement and coagulation cascades	7/204	80/9206	0.00191475	0.00191475	0.0742387	C2/C4BPB/C6/C9/CFB/SERPINA1/THBD	7
ssc04510	Focal adhesion	11/204	200/9206	0.004883	0.004883	0.162277	COL4A6/FLNC/FN1/ITGA1/ITGA5/ITGA7/LAMC1/MAPK10/THBS2/THBS4/TNXB	11
ssc04971	Gastric acid secretion	6/204	74/9206	0.00583329	0.00583329	0.163159	ATP1A2/ATP1A3/CAMK2A/GAST/PLCB4/SST	6
ssc05146	Amoebiasis	7/204	99/9206	0.00631225	0.00631225	0.163159	C9/COL4A6/FN1/LAMC1/LOC396781/MUC2/PLCB4	7
ssc04141	Protein processing in endoplasmic reticulum	9/204	165/9206	0.0110619	0.0110619	0.245327	BAG2/CALR/DERL3/DNAJB11/ERO1B/MAPK10/PDIA3/PDIA4/TUSC3	9
ssc04260	Cardiac muscle contraction	6/204	87/9206	0.0125638	0.0125638	0.245327	ATP1A2/ATP1A3/CACNA1D/CASQ2/COX5B/HRC	6
ssc04725	Cholinergic synapse	7/204	113/9206	0.0126549	0.0126549	0.245327	ACHE/CACNA1D/CAMK2A/CHRM1/CHRM2/PLCB4/SLC18A3	7
ssc05165	Human papillomavirus infection	14/204	328/9206	0.0142546	0.0142546	0.255082	ATP6V1C2/COL4A6/FN1/FZD2/ISG15/ITGA1/ITGA5/ITGA7/LAMC1/MX1/OASL/THBS2/THBS4/TNXB	14
ssc05150	Staphylococcus aureus infection	6/204	92/9206	0.0162101	0.0162101	0.256808	C2/CFB/KRT18/KRT19/LOC396781/SELP	6
ssc04925	Aldosterone synthesis and secretion	6/204	93/9206	0.0170185	0.0170185	0.256808	ATP1A2/ATP1A3/CACNA1D/CAMK2A/NPR1/PLCB4	6
ssc04924	Renin secretion	5/204	69/9206	0.018184	0.018184	0.256808	CACNA1D/CLCA2/KCNMA1/NPR1/PLCB4	5
ssc04950	Maturity onset diabetes of the young	3/204	26/9206	0.0191573	0.0191573	0.256808	NEUROG3/NKX2-2/RFX6	3
ssc04973	Carbohydrate digestion and absorption	4/204	47/9206	0.0198707	0.0198707	0.256808	ATP1A2/ATP1A3/CACNA1D/PLCB4	4
ssc04514	Cell adhesion molecules	8/204	155/9206	0.0218363	0.0218363	0.261218	CDH3/CLDN15/CLDN5/CNTN1/JAM2/L1CAM/NCAM1/SELP	8
ssc04972	Pancreatic secretion	6/204	99/9206	0.0224577	0.0224577	0.261218	ATP1A2/ATP1A3/CLCA2/KCNMA1/PLCB4/PNLIPRP2	6
ssc04961	Endocrine and other factor-regulated calcium reabsorption	4/204	50/9206	0.024382	0.024382	0.267368	ATP1A2/ATP1A3/PLCB4/TRPV5	4
ssc04721	Synaptic vesicle cycle	5/204	76/9206	0.0264344	0.0264344	0.267368	ATP6V1C2/CPLX1/SLC18A1/SLC18A3/SNAP25	5
ssc05412	Arrhythmogenic right ventricular cardiomyopathy	5/204	76/9206	0.0264344	0.0264344	0.267368	ACTN2/CACNA1D/ITGA1/ITGA5/ITGA7	5
ssc04810	Regulation of actin cytoskeleton	10/204	228/9206	0.030308	0.030308	0.293775	C6/C9/CHRM1/CHRM2/DIAPH3/FN1/IQGAP3/ITGA1/ITGA5/ITGA7	10
ssc04270	Vascular smooth muscle contraction	7/204	137/9206	0.032499	0.032499	0.302411	CACNA1D/CALCB/CALCB/KCNMA1/KCNMB1/NPR1/PLCB4	7
ssc05143	African trypanosomiasis	3/204	37/9206	0.0480064	0.0480064	0.419093	IDO2/LOC396781/PLCB4	3
ssc05322	Systemic lupus erythematosus	6/204	119/9206	0.0486413	0.0486413	0.419093	C2/C6/C9/LOC100525821/LOC110261735/LOC396781	6
